# Supplementary material for: TRPV1 drugs alter core body temperature via central projections of primary afferent sensory neurons
Source: eLife. 2022 Aug 15;11:e80139. doi: 10.7554/eLife.80139 (PMC9377796; doi:10.7554/eLife.80139)
Supplement: Figure 1—figure supplement 2—source data 1. [file elife-80139-fig1-figsupp2-data1.xlsx]

## Sheet: PirtCre
Genotype	Trpv1fl/fl	Trpv1fl/fl	Trpv1fl/fl	Trpv1fl/fl	Trpv1fl/fl	PirtCre; Trpv1fl/fl	PirtCre; Trpv1fl/fl	PirtCre; Trpv1fl/fl	PirtCre; Trpv1fl/fl	PirtCre; Trpv1fl/fl	PirtCre; Trpv1fl/fl	PirtCre; Trpv1fl/fl	PirtCre; Trpv1fl/fl
Mouse #	Q234	Q235	Q261	R274	S025	Q233	Q259	Q260	R275	R276	R277	S023	S024
Mean body temp	36.1	36.18	36.15	35.37	36.05	35.64	36.88	36.29	36.47	35.99	36.71	36.27	36.65

## Sheet: Tg(Myh11-CreERT2)
Genotype	Tg(Myh11-CreERT2)	Tg(Myh11-CreERT2)	Tg(Myh11-CreERT2)	Tg(Myh11-CreERT2)	Tg(Myh11-CreERT2)	Tg(Myh11-CreERT2)	Tg(Myh11-CreERT2)	Tg(Myh11-CreERT2)	Tg(Myh11-CreERT2); Trpv1fl/fl	Tg(Myh11-CreERT2); Trpv1fl/fl	Tg(Myh11-CreERT2); Trpv1fl/fl	Tg(Myh11-CreERT2); Trpv1fl/fl	Tg(Myh11-CreERT2); Trpv1fl/fl	Tg(Myh11-CreERT2); Trpv1fl/fl	Tg(Myh11-CreERT2); Trpv1fl/fl
Mouse #	S161	S562	T467	T751	U288	U893	U894	U896	S164	S166	S640	S558	T502	T506	T896
Mean body temp	35.62	35.79	36.61	37.28	36.42	35.8	36.1	35.13	35.99	35.09	35.76	34.74	35.21	35.88	36.11
