# Supplementary material for: TRPV1 drugs alter core body temperature via central projections of primary afferent sensory neurons
Source: eLife. 2022 Aug 15;11:e80139. doi: 10.7554/eLife.80139 (PMC9377796; doi:10.7554/eLife.80139)
Supplement: Figure 1—source data 1. [file elife-80139-fig1-data1.xlsx]

## Sheet: PirtCre
Genotype	Trpv1fl/fl	Trpv1fl/fl	Trpv1fl/fl	Trpv1fl/fl	Trpv1fl/fl	Trpv1fl/fl	Trpv1fl/fl	Trpv1fl/fl	Trpv1fl/fl	Trpv1fl/fl	Trpv1fl/fl	PirtCre; Trpv1fl/fl	PirtCre; Trpv1fl/fl	PirtCre; Trpv1fl/fl	PirtCre; Trpv1fl/fl	PirtCre; Trpv1fl/fl	PirtCre; Trpv1fl/fl	PirtCre; Trpv1fl/fl	PirtCre; Trpv1fl/fl	PirtCre; Trpv1fl/fl	PirtCre; Trpv1fl/fl	PirtCre; Trpv1fl/fl	PirtCre; Trpv1fl/fl
% responder	22.222	60	50	70	53.846	38.889	30	35	36.842	26.316	11.765	0	0	0	11.111	0	16.667	0	4	0	0	17.647	0

## Sheet: Tg(Myh11-CreERT2)
Genotype	Tg(Myh11-CreERT2)	Tg(Myh11-CreERT2)	Tg(Myh11-CreERT2)	Tg(Myh11-CreERT2)	Tg(Myh11-CreERT2)	Tg(Myh11-CreERT2)	Tg(Myh11-CreERT2)	Tg(Myh11-CreERT2); Trpv1fl/fl	Tg(Myh11-CreERT2); Trpv1fl/fl	Tg(Myh11-CreERT2); Trpv1fl/fl	Tg(Myh11-CreERT2); Trpv1fl/fl	Tg(Myh11-CreERT2); Trpv1fl/fl	Tg(Myh11-CreERT2); Trpv1fl/fl	Tg(Myh11-CreERT2); Trpv1fl/fl
% responder	64.4444	50	46.5753	56.7164	68.8889	45.4545	65.625	40.7407	34	46.9388	61.5385	34.4828	51.1111	52.1739
