# Supplementary material for: TRPV1 drugs alter core body temperature via central projections of primary afferent sensory neurons
Source: eLife. 2022 Aug 15;11:e80139. doi: 10.7554/eLife.80139 (PMC9377796; doi:10.7554/eLife.80139)
Supplement: Figure 2—figure supplement 1—source data 1. [file elife-80139-fig2-figsupp1-data1.xlsx]

## Sheet: PirtCre Cap
Time	Trpv1fl/fl-Cap						Trpv1fl/fl-Veh						PirtCre;Trpv1fl/fl-Cap						PirtCre;Trpv1fl/fl-Veh
	Q234	Q235	Q261	R274			Q234	Q235	Q261	R274			Q233	Q259	Q260	R275	R276	R277	Q233	Q259	Q260	R275	R276	R277
-1	35.78	35.6167	35.7367	34.9567			35.9833	35.5733	36.06	35.69			34.92	35.6933	35.3933	36.0867	36.5733	36.2933	34.9	36.0333	35.9067	35.96	36.2933	36.7833
-0.983333	35.59	35.5867	35.7567	35.0033			35.99	35.66	36.1133	35.6767			34.9133	35.8033	35.4633	36.09	36.5533	36.2733	34.9267	36.0167	35.9067	35.93	36.3067	36.83
-0.966667	35.54	35.6333	35.81	35.07			36.01	35.9667	36.1567	35.6733			34.8867	35.8233	35.5233	36.08	36.5267	36.2933	34.9067	35.99	35.91	35.9467	36.27	36.88
-0.95	35.47	35.6733	35.81	35.0933			36.0267	36.0367	36.19	35.7167			34.8667	35.8033	35.5733	36.0967	36.48	36.3333	34.8933	35.99	35.9	35.99	36.14	36.93
-0.933333	35.4467	35.6733	35.8	35.1133			36.0267	36.0267	36.2033	35.8167			34.8467	35.7833	35.5967	36.0833	36.4467	36.36	34.9567	35.9833	35.87	35.99	36.0667	36.9633
-0.916667	35.47	35.67	35.82	35.1067			36.0167	36.0133	36.1833	35.8167			34.8333	35.79	35.59	36.0133	36.43	36.3733	35.04	35.97	35.77	36.0233	36.08	36.9467
-0.9	35.44	35.6667	35.8867	35.1067			36.0033	35.9967	36.1533	35.81			34.82	35.8	35.58	35.98	36.4533	36.3567	35.07	35.9433	35.7867	36.07	36.13	36.9467
-0.883333	35.4133	35.6667	36.0067	35.1267			36	35.9533	36.1567	35.7933			34.8233	35.8033	35.5867	35.96	36.4933	36.34	35.0533	35.9033	35.8067	36.1033	36.12	37.05
-0.866667	35.53	35.6467	36.0967	35.2433			36.0267	35.9267	36.1633	35.7367			34.87	35.8167	35.6233	36.02	36.5033	36.3467	35.0833	35.8767	35.7167	36.1467	36.1567	37.0933
-0.85	35.73	35.62	36.1167	35.3467			36.02	35.9133	36.1133	35.69			34.9333	35.8333	35.6367	36.02	36.5	36.3933	35.25	35.87	35.63	36.13	36.34	37.11
-0.833333	35.9267	35.5967	36.11	35.2867			35.9667	35.8933	36.0867	35.6767			34.9533	35.84	35.66	36.0233	36.5133	36.4767	35.2667	35.8767	35.6133	36.06	36.41	37.12
-0.816667	35.9833	35.58	36.09	35.1233			35.94	35.86	36.0767	35.67			34.9767	35.83	35.63	36.0267	36.48	36.5333	35.1967	35.8533	35.7633	36	36.3867	37.1167
-0.8	35.9867	35.5767	36.0867	35.0533			35.9267	35.8467	36.1467	35.6633			34.99	35.8433	35.6833	36.02	36.3767	36.54	35.15	35.84	35.9867	35.9633	36.3633	37.1033
-0.783333	36.02	35.5667	36.06	34.9833			35.92	35.8367	36.2	35.6433			35.0033	35.8467	35.86	36.06	36.43	36.6133	35.1467	35.9233	36.0533	35.9433	36.3567	37.0633
-0.766667	36.0133	35.57	36.0233	34.84			35.91	35.8133	36.22	35.6233			35.0667	35.7967	35.9433	36.0933	36.4767	36.66	35.16	35.98	36.0833	35.9333	36.4433	37.0167
-0.75	35.99	35.57	36.0133	34.8067			35.9167	35.7767	36.23	35.6167			35.1267	35.7567	35.8333	36.1467	36.4633	36.66	35.17	36.04	36.1133	35.9267	36.4867	37.01
-0.733333	35.9833	35.56	36.0133	34.72			35.9133	35.7567	36.2267	35.6267			35.2633	35.7067	35.7967	36.18	36.4433	36.6533	35.1633	36.1067	36.12	35.91	36.62	37.0133
-0.716667	35.9433	35.52	35.9933	34.6733			35.91	35.73	36.1933	35.6567			35.33	35.6433	35.8567	36.2167	36.4567	36.6533	35.13	36.2033	36.0667	35.8967	36.65	37.0033
-0.7	35.94	35.52	35.9333	34.6433			35.9767	35.7067	36.1033	35.6533			35.42	35.5967	35.94	36.17	36.5	36.6967	35.12	36.4367	35.92	35.89	36.6433	36.9633
-0.683333	35.9233	35.6133	35.87	34.5667			36.0133	35.6867	36.0233	35.6333			35.3933	35.5867	36.01	36.12	36.5467	36.7233	35.1233	36.57	36.0333	35.8767	36.62	36.9333
-0.666667	35.87	35.6233	35.8333	34.6033			36.0333	35.6967	36.0767	35.68			35.3567	35.6967	36.0033	36.1033	36.5867	36.7267	35.1033	36.5533	36.1867	35.8667	36.4667	36.9133
-0.65	35.8333	35.6167	35.8033	34.67			36.05	35.7167	36.1267	35.73			35.32	35.69	35.9533	36.1233	36.5767	36.7067	35.0767	36.6933	36.24	35.8567	36.33	36.8767
-0.633333	35.8167	35.61	35.7933	34.7			36.0767	35.7267	36.1067	35.72			35.29	35.7333	35.8933	36.15	36.62	36.7	35.0633	36.76	36.31	35.86	36.3367	36.83
-0.616667	35.8033	35.73	35.8167	34.73			36.0733	35.7267	36.08	35.72			35.3367	35.7567	35.8867	36.1467	36.7567	36.6933	35.0533	36.7433	36.3767	35.8567	36.4333	36.7933
-0.6	35.81	35.8267	35.8867	34.8867			36.0767	35.7167	36.0833	35.6867			35.3667	35.75	35.95	36.1233	36.8167	36.6767	35.0567	36.6867	36.4133	35.81	36.52	36.7467
-0.583333	35.7867	35.8633	35.88	35.03			36.0767	35.6967	36.05	35.65			35.3533	35.74	35.9467	36.1133	36.8433	36.67	35.0833	36.65	36.4067	35.7767	36.5033	36.71
-0.566667	35.7433	35.8433	35.8533	35.1033			36.0567	35.6467	36.04	35.6367			35.3167	35.7567	35.9067	36.1133	36.85	36.6533	35.08	36.5933	36.3867	35.78	36.44	36.67
-0.55	35.7967	35.89	35.8267	35.15			36.03	35.58	36.08	35.64			35.2767	35.7933	35.8567	36.13	36.8667	36.6433	35.0733	36.5867	36.3867	35.7833	36.4333	36.63
-0.533333	35.9167	36.0267	35.8133	35.2133			36.0067	35.5633	36.0833	35.6333			35.23	35.81	35.7867	36.1	36.88	36.5933	35.0633	36.56	36.3867	35.7833	36.4767	36.58
-0.516667	35.93	36.1067	35.7967	35.22			35.9567	35.53	36.0633	35.59			35.05	35.7567	35.72	36.04	36.87	36.56	35.07	36.52	36.4167	35.7767	36.4667	36.5167
-0.5	35.8867	36.1567	35.7867	35.2033			35.9533	35.5733	36.02	35.52			34.95	35.6767	35.64	35.9867	36.8633	36.54	35.08	36.4667	36.44	35.7667	36.4367	36.48
-0.483333	35.7733	36.1867	35.8367	35.24			35.98	35.6767	35.9767	35.3767			34.9033	35.64	35.5733	35.9	36.8333	36.5367	35.0733	36.3733	36.4	35.7433	36.3867	36.4533
-0.466667	35.61	36.1867	35.8667	35.29			35.99	35.7067	35.9367	35.39			34.9033	35.6267	35.5567	35.8867	36.7967	36.5533	35.04	36.3067	36.3667	35.72	36.32	36.4333
-0.45	35.5533	36.1333	35.87	35.2967			36.01	35.6967	35.9033	35.5133			34.91	35.63	35.5233	35.9667	36.7567	36.5733	35.0033	36.27	36.4033	35.7267	36.26	36.42
-0.433333	35.5933	36.0833	35.8533	35.2933			36.0233	35.93	35.8833	35.5133			34.88	35.62	35.51	36.07	36.7067	36.5567	34.9867	36.2267	36.38	35.73	36.19	36.4067
-0.416667	35.6533	36.04	35.8467	35.1667			36.0033	36.0433	35.8367	35.46			34.8767	35.6367	35.4933	36.1633	36.67	36.53	34.9667	36.17	36.3633	35.71	36.1367	36.3933
-0.4	35.8133	35.9767	35.8333	35.1567			35.9667	36.0433	35.81	35.3767			34.91	35.6533	35.5033	36.2267	36.6533	36.51	34.95	36.1133	36.3633	35.6767	36.0967	36.4433
-0.383333	35.8467	35.9167	35.8467	35.19			35.9433	36.0467	35.9067	35.1933			34.92	35.66	35.63	36.2967	36.6467	36.5167	34.94	36.0567	36.3433	35.63	36.0933	36.4533
-0.366667	35.88	35.8867	35.8767	35.2567			35.93	36.0533	35.9833	35.1367			34.91	35.6767	35.6767	36.3567	36.6533	36.53	34.9367	35.9733	36.3167	35.62	36.1133	36.4267
-0.35	35.8967	35.9033	35.88	35.2133			35.9767	36.0467	36.0167	35.0733			34.89	35.6867	35.7033	36.4133	36.6767	36.5333	34.9267	35.8933	36.19	35.6267	36.1433	36.4133
-0.333333	35.8533	35.9667	35.8667	35.06			36.0567	36.0133	36.04	34.97			34.91	35.7	35.7467	36.4	36.69	36.55	34.9167	35.8367	36.0767	35.64	36.1533	36.3967
-0.316667	35.81	36.0167	35.8367	34.95			36.0933	35.99	36.0467	35.0167			35.0433	35.7	35.7567	36.3533	36.6667	36.5533	34.9333	35.8233	36.2333	35.6667	36.1667	36.37
-0.3	35.89	36.0167	35.8167	34.8467			36.1067	35.9867	36.0567	35.3267			35.0233	35.6967	35.72	36.3267	36.6533	36.5533	34.95	35.7967	36.2767	35.72	36.18	36.3333
-0.283333	35.9433	36.0367	35.8133	34.7767			36.0767	35.9633	36.0633	35.5867			34.99	35.6833	35.65	36.3133	36.6533	36.5567	34.9633	35.78	36.2433	35.71	36.1667	36.2933
-0.266667	36	36.05	35.8433	34.79			36.0433	35.95	36.05	35.6267			35.0733	35.6467	35.67	36.3767	36.6367	36.5533	34.98	35.76	36.2167	35.6967	36.1167	36.2667
-0.25	36.07	35.9867	35.8633	34.8033			36.0233	35.9167	35.9667	35.5533			35.0733	35.57	35.7433	36.4867	36.6433	36.5567	34.9967	35.76	36.2	35.7633	36.08	36.2433
-0.233333	36.16	35.9233	35.9033	34.8433			36.0033	35.87	35.95	35.49			35.0367	35.55	35.75	36.54	36.65	36.5567	34.9867	35.7667	36.15	35.8167	36.1033	36.2767
-0.216667	36.1067	35.9133	35.9133	34.8833			35.9833	35.8267	35.96	35.3233			35.0067	35.5533	35.71	36.56	36.62	36.54	34.99	35.7733	36.08	35.8533	36.1233	36.2833
-0.2	36.0267	35.9067	35.9067	34.8767			35.97	35.8067	36.0367	35.3733			34.9867	35.6267	35.68	36.5667	36.6133	36.5233	34.98	35.7933	35.9967	35.9	36.09	36.2867
-0.183333	36.0533	35.8933	35.8633	34.8233			36.02	35.8033	36.0333	35.5733			35.0067	35.67	35.66	36.5467	36.6367	36.5333	34.9533	35.7867	35.9033	35.9667	35.98	36.28
-0.166667	36.0967	35.8733	35.73	34.8733			36.05	35.7967	36.0133	35.6667			35.0333	35.6867	35.64	36.6	36.6367	36.5333	35.01	35.7667	35.8233	35.9667	35.9467	36.26
-0.15	36.0233	35.87	35.7267	34.9967			36.0267	35.77	36.0667	35.6567			35.0333	35.6767	35.6133	36.6433	36.6267	36.5333	35.0667	35.75	35.76	35.9233	36.1267	36.2467
-0.133333	35.8933	35.8967	35.7567	34.9933			35.9967	35.75	36.08	35.6533			35.09	35.6433	35.5833	36.6333	36.6	36.5267	35.0433	35.7533	35.6933	35.88	36.2033	36.2767
-0.116667	35.8433	35.9233	35.86	34.94			35.9933	35.7333	36.0867	35.6533			35.1467	35.54	35.5567	36.5533	36.5267	36.5233	35.04	35.74	35.6267	35.8933	36.21	36.28
-0.1	35.91	35.9033	35.89	34.9			36	35.7267	36.0733	35.6367			35.1767	35.44	35.5167	36.4833	36.49	36.5367	35.02	35.7033	35.5833	35.9567	36.15	36.2667
-0.0833333	35.9367	35.8633	35.8967	34.8767			36.0033	35.72	36.04	35.5933			35.1567	35.5333	35.4967	36.4567	36.51	36.55	34.9767	35.64	35.5467	35.9833	36.0133	36.2433
-0.0666667	36.0167	35.8867	35.91	34.9167			35.9733	35.7033	36.0167	35.5067			35.0233	35.69	35.45	36.4267	36.54	36.56	35.0067	35.5967	35.53	36.02	35.9567	36.23
-0.05	36.04	35.9	35.9833	34.9333			35.9	35.7267	36.0233	35.5133			34.9367	35.8933	35.4733	36.3967	36.54	36.5633	35.03	35.6633	35.51	36.1267	35.93	36.2133
-0.0333333	36.02	35.8833	35.9833	34.9333			35.8033	35.82	36.0367	35.5067			34.9167	36.0967	35.55	36.3567	36.5433	36.5133	35.0567	35.75	35.48	36.24	35.9533	36.2
-0.0166667	35.9	35.8667	35.97	35.0333			35.7633	35.9033	36.0367	35.4833			34.9133	36.22	35.57	36.3433	36.5433	36.5067	35.0733	35.81	35.4733	36.3333	35.96	36.1767
0	35.9133	35.8633	35.95	35.0767			35.7067	35.9167	36.0267	35.5133			34.91	36.2833	35.5833	36.3467	36.5433	36.5833	35.08	35.9267	35.4933	36.34	35.9233	36.15
0.0166667	35.89	35.8967	35.9033	35.0633			35.6767	35.9	35.9933	35.5133			34.9133	36.3133	35.6367	36.3533	36.5233	36.64	35.2067	35.9533	35.5367	36.2667	35.91	36.15
0.0333333	35.8567	36.0133	35.8767	35.0333			35.71	35.8733	35.9333	35.4533			34.94	36.37	35.7267	36.3733	36.4967	36.7067	35.2933	35.9467	35.64	36.22	35.93	36.1533
0.05	35.75	36.0833	35.9067	34.065			35.14	35.9067	35.9167	34.5167			35.0033	35.2267	35.8633	36.4667	36.5967	36.76	35.2967	35.13	35.7267	36.3167	35.95	36.25
0.0666667	35.5767	36.1933	36.0667	34.0833			35.155	35.9633	36.0367	34.3967			35.15	35.13	35.95	36.6133	36.7333	36.8467	35.21	35.0667	35.7733	36.3933	36.0467	36.4967
0.0833333	35.665	36.2433	36.2567	33.7867			35.2267	36.03	36.1233	34.16			35.29	35.0567		36.6167	36.8833	37.01	35.08	34.97	35.495	36.235	36.22	36.85
0.1	35.1333	36.3433	36.4067	33.55			35.0667	36.1233	36.1667	33.8067			35.2	34.92	35.54	36.82	36.9667	37.23	35.18	35.02	35.5767	36.25	36.4133	37.1567
0.116667	34.9467	36.4133	36.36	33.6233			34.9767	36.2367	36.0867	33.8333			35.2467	34.79	35.6533	36.6533	37.03	37.46	35.1433	35.1967	35.4467	36.31	36.58	37.3933
0.133333	34.7467	36.5333	36.3	33.6133			34.89	36.2	36.1567	33.96			35.485	34.8767	35.7667	36.6667	36.9167	37.5667	35.02	35.2233	35.3533	36.5267	36.5767	37.5033
0.15	34.6067	36.75	36.23	33.6633			34.7333	36.345	36.15	33.9433			35.0467	34.8867	35.8167	36.6433	36.86	37.53	34.81	35.22	35.4733	36.71	36.5967	37.3333
0.166667	34.2833	36.3733	36.14	33.5933			34.57	36.24	36.19	33.9733			34.82	34.6533	35.8067	36.56	36.86	37.3767	34.7167	35.1567	35.52	36.8667	36.6467	37.0967
0.183333	34.04	36.2033	36.0167	33.42			34.5133	36.2367	36.18	33.9167			34.7433	34.55	35.83	36.4833	36.925	37.39	34.5567	35.05	35.2733	37.01	36.6733	37.1
0.2	33.8367	36.04	35.9033	33.2633			34.3667	36.22	36.0333	33.9467			34.7	34.49	35.85	36.4567	37.1333	37.3767	34.4733	34.9367	34.9767	37.1333	36.55	37.22
0.216667	33.69	35.8633	35.7467	33.1733			34.3333	36.15	36.0733	33.93			34.64	34.5433	35.7433	36.4333	37.0667	37.2833	34.53	34.9267	35.11	37.1633	36.52	37.3467
0.233333	33.5767	35.5833	35.3667	33.0567			34.3067	35.9933	36.1533	34.0467			34.57	34.4933	35.6	36.37	36.9633	36.965	34.5633	34.95	35.1933	37.1467	36.5167	37.3933
0.25	33.32	35.25	35.06	32.94			34.2967	35.9133	36.1533	34.2267			34.4767	34.4833	35.59	36.3433	36.8333	36.945	34.56	34.94	35.19	37.12	36.49	37.3667
0.266667	32.9867	34.9233	34.8833	32.81			34.49	35.86	36.1267	34.38			34.3167	34.5667	35.5767	36.3733	36.69	36.9533	34.49	34.91	35.3033	37.0933	36.4533	37.3067
0.283333	32.7633	34.6667	34.7033	32.6767			34.64	35.8267	36.1067	34.5433			34.13	34.4233	35.47	36.3133	36.5667	36.9767	34.5567	34.81	35.3033	37.1633	36.6233	37.2667
0.3	32.58	34.41	34.55	32.4967			34.5967	35.7667	36.03	34.57			34.04	34.4633	35.3967	36.2867	36.49	36.98	34.6967	34.6533	35.2067	37.2	36.81	37.22
0.316667	32.4333	34.2033	34.42	32.3067			34.5167	35.6933	35.9633	34.6333			34.0333	34.52	35.35	36.33	36.3567	36.95	34.7267	34.4667	35.26	37.22	36.7867	37.14
0.333333	32.25	34.0333	34.2733	32.15			34.3967	35.6667	35.8133	34.74			33.97	34.5	35.2933	36.31	36.25	36.8933	34.7133	34.3867	35.25	37.2433	36.7433	37.05
0.35	32.0967	33.8367	34.11	32.0267			34.34	35.6133	35.87	34.8567			33.95	34.48	35.2567	36.2133	36.1767	36.8233	34.7533	34.24	35.04	37.28	36.7533	36.9667
0.366667	31.8767	33.6033	33.9533	31.9533			34.42	35.5767	36.0133	34.96			33.9567	34.4167	35.1967	36.15	36.0767	36.7633	34.7767	34.2	34.79	37.2767	36.7667	36.9533
0.383333	31.6567	33.4267	33.7133	31.8433			34.5	35.5867	36.07	34.9233			33.9033	34.3533	35.07	36.13	35.9967	36.7267	34.8133	34.2667	34.62	37.24	36.7467	37.0233
0.4	31.46	33.2633	33.45	31.7267			34.47	35.6033	36.0767	34.7533			33.8	34.2033	34.9667	36.15	35.9533	36.6933	34.8233	34.28	34.56	37.1867	36.6667	37.0433
0.416667	31.3133	33.11	33.24	31.6067			34.42	35.61	36.0533	34.6867			33.7033	34.12	34.8133	36.1433	35.92	36.6667	34.8533	34.2233	34.4733	37.17	36.6	37.0867
0.433333	31.2	32.9667	33.0467	31.3833			34.42	35.64	36.0567	34.69			33.69	34.1933	34.6767	36.12	35.8833	36.65	34.7667	34.1933	34.44	37.1633	36.58	37.1133
0.45	31.11	32.82	32.8433	31.3133			34.44	35.7	36.13	34.6333			33.6667	34.31	34.65	36.11	35.86	36.6733	34.6067	34.12	34.47	37.16	36.6367	37.0733
0.466667	31.03	32.7033	32.6367	31.755			34.43	35.6933	36.17	34.55			33.6567	34.3467	34.66	36.1233	35.8267	36.7	34.5333	34.0167	34.5133	37.1467	36.6233	37.0967
0.483333	30.9667	32.5733	32.4667	31.595			34.3033	35.71	36.2833	34.5			33.6267	34.3033	34.7333	36.06	35.7733	36.6633	34.57	33.94	34.59	37.0767	36.5733	37.1267
0.5	30.92	32.42	32.33	31.485			34.1667	35.7333	36.33	34.4633			33.53	34.34	34.9267	35.9767	35.7333	36.64	34.6267	33.8533	34.65	36.97	36.5	37.1833
0.516667	30.84	32.2467	32.23	31.425			34.1667	35.7467	36.3	34.4633			33.42	34.3667	35.05	35.9467	35.7033	36.65	34.55	33.7967	34.6933	36.93	36.3633	37.2067
0.533333	30.7667	32.0733	32.11	31.35			34.1733	35.7067	36.3033	34.4233			33.3933	34.4067	35.0733	35.9467	35.6767	36.6967	34.3867	33.7033	34.68	37	36.28	37.2033
0.55	30.66	31.9167	31.99	31.18			34.1867	35.67	36.4	34.3067			33.3833	34.4333	34.9733	35.9633	35.7033	36.69	34.2533	33.6367	34.67	37.0167	36.18	37.2233
0.566667	30.5867	31.7967	31.8867	30.97			34.23	35.7467	36.4833	34.1667			33.4367	34.39	34.88	35.9233	35.7067	36.69	34.17	33.5533	34.6233	37.0033	36.1367	37.21
0.583333	30.5433	31.68	31.7667	31.62			34.3033	35.79	36.57	34.1067			33.4433	34.3667	34.88	35.88	35.73	36.72	34.1133	33.4667	34.65	36.97	36.1267	37.16
0.6	30.4933	31.5933	31.65	31.45			34.32	35.74	36.5333	34.1133			33.36	34.3533	34.8867	35.79	35.7233	36.7133	34.01	33.4933	34.7567	36.9533	36.1467	37.0867
0.616667	30.46	31.5167	31.5533	31.4			34.2433	35.7	36.49	34.11			33.2233	34.1533	34.9	35.6633	35.7567	36.6867	34.04	33.5133	34.7467	36.94	36.1167	37.0367
0.633333	30.4133	31.45	31.4767	31.44			34.2833	35.7967	36.5167	34.05			33.0833	34.0933	34.9233	35.58	35.7767	36.6867	34.1433	33.4967	34.7933	36.9367	36.1567	36.93
0.65	30.3567	31.3967	31.4067	31.44			34.4	35.97	36.48	33.9267			33.0067	34.14	34.8733	35.5833	35.71	36.67	34.1967	33.4267	34.8067	36.89	36.1533	36.8533
0.666667	30.2733	31.3367	31.36	31.43			34.4033	36.01	36.4133	33.88			32.9867	34.12	34.8	35.6167	35.64	36.65	34.2033	33.3933	34.78	36.8767	36.1133	36.8067
0.683333	30.16	31.2433	31.3233	31.38			34.42	35.9933	36.4033	34.0733			32.94	34.1767	34.8267	35.6467	35.5433	36.7367	34.1433	33.2933	34.81	36.91	36.0667	36.74
0.7	30.1	31.1067	31.3	31.28			34.56	35.95	36.3933	34.1933			32.8967	34.33	34.9633	35.6233	35.5267	36.7867	34.19	33.2667	34.7833	36.9067	36.08	36.6
0.716667	30.0533	31.0067	31.2633	31.18			34.6167	35.97	36.33	34.22			32.8833	34.3533	34.9033	35.5233	35.5667	36.8133	34.1633	33.2867	34.7767	36.8767	36.1	36.41
0.733333	30.0067	30.9733	31.2433	31.07			34.6033	35.95	36.1933	34.21			32.87	34.4367	34.77	35.48	35.5733	36.7533	34.1533	33.2867	34.8233	36.89	36.1133	36.2733
0.75	29.9467	30.9533	31.23	31.05			34.5733	35.92	36.1733	34.12			32.8633	34.48	34.69	35.4433	35.5467	36.7733	34.18	33.2567	34.8633	36.9	36.1067	36.1867
0.766667	29.8867	30.9167	31.2233	31.1			34.4933	35.89	36.3167	34.0967			32.8467	34.5	34.69	35.4	35.52	36.7967	34.2367	33.2567	34.8167	36.89	36.0867	36.1833
0.783333	29.84	30.88	31.2167	31.13			34.42	35.8633	36.3267	34.22			32.81	34.5167	34.7033	35.3467	35.4967	36.8267	34.3	33.3267	34.72	36.88	36.0467	36.31
0.8	29.7967	30.83	31.2133	31.14			34.3733	35.84	36.27	34.23			32.7367	34.5133	34.7967	35.2767	35.4533	36.8733	34.3867	33.41	34.6467	36.8733	35.9667	36.32
0.816667	29.7667	30.77	31.2333	31.14			34.3167	35.8333	36.3233	34.17			32.6167	34.43	34.9067	35.27	35.4067	36.8867	34.4533	33.3833	34.57	36.8567	35.8467	36.2767
0.833333	29.7067	30.7367	31.2367	31.15			34.2133	35.8367	36.3467	34.0367			32.5167	34.3167	34.9933	35.31	35.3967	36.8967	34.49	33.3067	34.53	36.8767	35.8	36.2267
0.85	29.6567	30.7067	31.2267	31.14			34.19	35.7933	36.2833	33.99			32.4367	34.25	35.0633	35.32	35.33	36.91	34.49	33.2233	34.6667	36.86	35.78	36.1533
0.866667	29.6067	30.6733	31.22	31.11			34.2233	35.7833	36.2833	33.92			32.3933	34.23	35.0333	35.23	35.31	36.91	34.4867	33.18	35.0367	36.8067	35.7467	36.1133
0.883333	29.52	30.6433	31.22	31.13			34.36	35.8167	36.2933	33.8833			32.3567	34.16	34.9433	35.1933	35.3167	36.8967	34.54	33.1233	35.1067	36.8233	35.67	36.09
0.9	29.4533	30.62	31.2233	31.12			34.4467	35.88	36.3	33.8867			32.3967	34.1167	34.9067	35.1267	35.2933	36.8533	34.6433	33.0667	35.01	36.8233	35.56	36.0367
0.916667	29.4267	30.6	31.23	30.99			34.4533	35.9167	36.2867	33.9033			32.46	34.11	34.98	35.1067	35.27	36.8833	34.64	33.0033	34.9567	36.7967	35.5167	35.9333
0.933333	29.4333	30.58	31.2433	30.85			34.4	35.9233	36.19	33.9033			32.5	34.17	34.9967	35.07	35.2367	36.9567	34.5433	32.9267	34.9867	36.75	35.5267	35.8367
0.95	29.4267	30.56	31.2567	30.64			34.3467	35.9367	36.0933	33.98			32.6433	34.4567	34.99	34.99	35.24	37.0233	34.47	32.87	34.98	36.71	35.51	35.79
0.966667	29.4067	30.5667	31.26	30.33			34.3233	35.9467	36.15	34.0167			32.68	34.6367	34.9967	34.9633	35.2533	37.1133	34.45	32.8467	34.9067	36.72	35.4867	35.7233
0.983333	29.3833	30.56	31.27	30.22			34.3267	35.9467	36.2267	34.02			32.66	34.64	35.0167	34.9567	35.37	37.1567	34.43	32.83	34.8367	36.7033	35.4567	35.6567
1	29.3767	30.5467	31.29	30.34			34.39	35.9633	36.28	34.11			32.6267	34.59	35.04	34.9267	35.4133	37.1333	34.3533	32.8533	34.7967	36.6467	35.4733	35.6133
1.01667	29.3433	30.56	31.3033	30.43			34.4567	35.9367	36.3233	34.0533			32.5933	34.5533	35.0267	34.8933	35.4067	37.04	34.2333	32.8333	34.8867	36.5933	35.45	35.5833
1.03333	29.3033	30.59	31.2733	30.34			34.2833	35.8733	36.33	34.11			32.5533	34.5333	35	34.8633	35.4	37.03	34.3	32.8033	34.9333	36.5967	35.4367	35.5833
1.05	29.2833	30.61	31.2833	30.39			34.1367	35.8533	36.3167	34.3067			32.51	34.4967	35.0667	37.27	35.3367	37.0433	34.4567	32.7467	34.9433	36.6133	35.4367	35.5667
1.06667	29.2733	30.6167	31.3033	30.45			34.13	35.8833	36.2533	34.4133			32.45	34.54	35.1767	37.335	35.3267	37.0033	34.4767	32.7067	34.8867	36.6267	35.3267	35.5167
1.08333	29.2567	30.6167	31.34	30.35			34.19	35.87	36.1933	34.3633			32.3433	34.5167	35.2067	37.32	35.3367	36.9733	34.4667	32.6167	34.8133	36.6633	35.2667	35.4733
1.1	29.2433	30.6133	31.37	30.22			34.3467	35.85	36.1833	34.2933			32.2867	34.4733	35.19	37.265	35.35	37	34.5067	32.5233	34.8133	36.6833	35.2433	35.4633
1.11667	29.2567	30.6167	31.4033	30.15			34.51	35.86	36.1633	34.23			32.24	34.6267	35.22	37.28	35.36	37	34.5333	32.4467	34.8167	36.68	35.2333	35.4467
1.13333	29.2867	30.6333	31.43	30.15			34.5933	35.8367	36.1667	34.1467			32.1867	34.6067	35.2167	34.8767	35.3767	37.0233	34.53	33.615	34.7333	36.6933	35.26	35.4133
1.15	29.3233	30.6867	31.5	30.16			34.5833	35.77	36.1733	33.8933			32.1367	34.45	35.3333	34.9667	35.3833	37	34.5333	33.605	34.69	36.74	35.3133	35.36
1.16667	29.3767	30.74	31.52	30.18			34.52	35.75	36.1833	33.7333			32.0867	34.4267	35.33	34.98	35.3933	36.93	34.4367	33.55	34.7467	36.7267	35.3333	35.29
1.18333	29.39	30.7867	31.5133	30.22			34.56	35.7567	36.19	33.6633			32.0467	34.46	35.27	34.9433	35.4467	36.8667	34.28	33.545	34.85	36.6633	35.31	35.2767
1.2	29.3333	30.8167	31.5233	30.27			34.6	35.7633	36.1533	33.6767			32	34.4633	35.2667	34.93	35.4667	36.82	34.27	33.605	34.88	36.6367	35.3033	35.25
1.21667	29.32	30.88	31.5333	30.3			34.55	35.81	36.0767	33.69			31.9733	34.42	35.1533	34.95	35.4733	36.8033	34.2533	33.6	35.0733	36.6533	35.3	35.2133
1.23333	29.3333	30.9333	31.57	30.35			34.6467	35.8033	36.0733	33.7			31.9667	34.3933	35.1833	34.9733	35.4633	36.8	34.24	33.53	35.7133	36.6567	35.28	35.1733
1.25	29.33	30.9267	31.61	30.41			34.7567	35.7733	36.07	33.7733			31.9433	34.3933	35.4133	34.95	35.4567	36.78	34.2467	33.48	35.7967	36.7133	35.2333	35.1333
1.26667	29.3	30.9567	31.6167	30.48			34.83	35.69	36.09	33.8433			31.9067	34.39	35.4933	34.9467	35.51	36.7267	34.25	33.52	35.5867	36.7733	35.15	35.11
1.28333	29.2967	31.0333	31.5467	30.55			34.88	35.49	36.0467	33.7633			31.8833	34.37	35.36	34.97	35.55	36.6867	34.1133	33.58	35.24	36.84	35.1367	35.0833
1.3	29.3	31.0767	31.5767	30.62			34.9633	35.44	36.0433	33.7933			31.86	34.3733	35.21	34.9767	35.6033	36.6667	34.1633	33.565	35.11	36.9233	35.13	35.0733
1.31667	29.3133	31.09	31.62	30.61			35.0033	35.4433	36.1167	33.83			31.8733	34.3667	35.3167	34.98	35.64	36.69	34.23	33.52	35.0567	36.9367	35.11	35.0433
1.33333	29.3167	31.1033	31.6567	30.54			34.9933	35.4133	36.1833	33.7233			31.8733	34.37	35.4267	34.9967	35.6733	36.7667	34.2333	33.5	35.0167	36.9433	35.0933	35.0167
1.35	29.3633	31.1333	31.68	30.72			35.12	35.5033	36.1767	33.6767			31.84	34.39	35.49	34.97	35.6133	36.79	34.21	33.52	35	36.9633	35.1067	35.0067
1.36667	29.47	31.1833	31.68	30.92			35.27	35.58	36.1467	33.62			31.8167	34.3667	35.6633	34.89	35.6333	36.7833	34.2233	33.495	35.0367	37.0333	35.11	34.9867
1.38333	29.52	31.23	31.6833	30.48			35.2733	35.5467	36.1733	33.6567			31.81	34.3767	36.1667	34.9	35.64	36.7933	34.2567	33.45	35.13	37.0567	35.0867	34.9733
1.4	29.5033	31.32	31.71	30.48			35.3433	35.59	36.12	33.7533			31.82	34.3967	36.39	34.9467	35.6067	36.8067	34.2333	33.46	35.1433	37.08	35.0867	34.9633
1.41667	29.5267	31.4033	31.7567	30.54			35.3533	35.64	36.1	33.8667			31.8133	34.4167	36.3433	34.9433	35.6333	36.8233	34.2267	33.465	35.0967	37.11	35.0933	34.9333
1.43333	29.5367	31.4733	31.8333	30.605			35.3333	35.6167	36.17	33.7367			31.8367	34.4433	36.3633	34.86	35.6633	36.8133	34.23	33.46	35.1267	37.08	35.06	34.91
1.45	29.5467	31.5267	31.89	30.675			35.3333	35.5967	36.3267	33.7733			31.8767	34.63	36.4633	34.7433	35.7167	36.7867	34.2267	33.495	35.1567	37.0133	35.0633	34.8767
1.46667	29.5867	31.5667	31.9333	30.5433			35.32	35.63	36.4133	34.1833			31.9133	34.6833	36.5533	34.73	35.8	36.7833	34.2233	33.495	35.1867	36.94	35.1067	34.8533
1.48333	29.6233	31.6367	31.97	30.5867			35.34	35.69	36.4333	34.2367			31.9133	34.6533	36.6833	34.75	35.82	36.78	34.2633	33.505	35.2867	36.9033	35.11	34.8367
1.5	29.6733	31.6767	32	30.7			35.3667	35.91	36.43	34.1533			31.85	34.65	36.7267	34.7933	35.75	36.7833	34.4133	33.59	35.67	36.9167	35.0667	34.8267
1.51667	29.65	31.7467	32.0133	30.7733			35.38	36.12	36.4667	34.1367			31.8267	34.71	36.7033	34.8233	35.75	36.7867	34.56	33.64	35.7867	36.8967	35.0767	34.82
1.53333	29.6567	31.8133	32.0467	30.7967			35.4	36.1733	36.4967	34.1233			31.88	34.7633	36.7433	34.8633	35.87	36.7933	34.6833	33.635	35.7867	36.9533	35.05	34.8233
1.55	29.7467	31.8967	32.0967	30.8367			35.4533	36.1567	36.46	34.0633			31.9767	34.8233	36.7633	34.89	36.0633	36.7833	34.7367	33.635	35.85	37.0267	35	34.8367
1.56667	29.8133	31.96	32.1533	30.9133			35.5633	36.0533	36.4533	34.1133			32.1	34.8567	36.8567	34.94	36.18	36.76	34.7367	33.655	35.92	36.9967	34.9667	34.8667
1.58333	29.86	32.06	32.2	31.0233			35.6867	35.9133	36.47	34.3767			32.2067	34.86	36.9133	34.9967	36.1967	36.7167	34.7633	33.695	36.01	36.92	34.9733	34.9367
1.6	29.8767	32.1467	32.2733	31.1567			35.9633	35.8567	36.4467	34.57			32.25	34.88	36.93	34.9933	36.1567	36.7067	34.7767	33.745	36.1033	36.91	34.9933	34.99
1.61667	29.8867	32.23	32.3433	31.2367			36.12	35.7367	36.4267	34.6967			32.2867	34.8733	36.9267	34.99	36.0767	36.7233	34.8567	33.8	36.1933	36.9033	35.0833	35.0167
1.63333	29.86	32.2733	32.4067	31.2667			36.1433	35.8867	36.4633	34.86			32.32	34.8567	36.88	34.9833	36.0733	36.72	35.0667	33.85	36.2467	36.8267	35.1133	35.02
1.65	29.82	32.32	32.5	31.4433			36.0567	35.9133	36.55	34.9167			32.3533	34.7733	36.89	35	36.1033	36.7367	35.2	33.9	36.3033	36.8	35.14	35.0433
1.66667	29.87	32.41	32.5867	31.5			36.06	35.83	36.5567	34.88			32.3667	34.7333	36.92	35.0067	36.1233	36.77	35.2433	33.96	36.3167	36.83	35.1433	35.1067
1.68333	29.93	32.4567	32.68	31.49			36.0767	35.8533	36.5467	34.9233			32.3933	34.7067	36.9433	35.03	36.15	36.8033	35.2467	34.03	36.31	36.8433	35.0833	35.13
1.7	29.9933	32.4033	32.77	31.5633			36.01	35.8867	36.5167	35.0067			32.39	34.67	37.0267	35.06	36.15	36.8267	35.2267	34.08	36.24	36.8667	35.0233	35.1133
1.71667	30.06	32.4333	32.87	31.7033			36.0267	35.9267	36.4733	35.0967			32.3667	34.65	37.0567	35.1067	36.1367	36.8167	35.2667	34.18	36.14	36.89	35.0233	35.0867
1.73333	30.1133	32.5933	32.9033	31.86			36.11	35.98	36.44	35.1467			32.4033	34.65	37.0433	35.13	36.1233	36.78	35.3033	34.24	36.3067	36.9	35.05	35.0867
1.75	30.17	32.7233	32.9667	32.0167			36.1233	35.9567	36.41	35.18			32.4333	34.63	37.0467	35.1767	36.1167	36.78	35.3667	34.31	36.38	36.92	35.1167	35.0867
1.76667	30.2267	32.8133	33.1233	32.0767			36.1267	35.8633	36.3733	35.1933			32.45	34.5633	37.1167	35.2533	36.1367	36.8033	35.42	34.39	36.43	36.8467	35.1733	35.0867
1.78333	30.2933	32.8867	33.2333	32.1767			36.11	35.7367	36.3467	35.1333			32.4733	34.49	37.1533	35.27	36.19	36.83	35.43	34.475	36.4467	36.8333	35.2333	35.0933
1.8	30.3533	32.9767	33.33	32.2633			36.1167	35.72	36.32	35.07			32.4933	34.49	37.0733	35.2367	36.21	36.8833	35.3433	34.535	36.44	36.8133	35.2633	35.1
1.81667	30.4133	33.0533	33.3667	32.35			36.11	35.7333	36.2867	34.98			32.51	34.4767	36.97	35.27	36.23	36.9033	35.2733	34.605	36.49	36.77	35.2767	35.1267
1.83333	30.4667	33.0967	33.41	32.46			35.9933	35.7533	36.26	34.93			32.54	34.45	36.9233	35.2667	36.2667	36.9267	35.05	34.775	36.5267	36.82	35.2933	35.1267
1.85	30.4967	33.1333	33.47	32.6067			35.8733	35.8533	36.2467	35.0767			32.5667	34.45	36.9033	35.2267	36.2867	36.94	34.9967	34.835	36.5367	36.8933	35.3167	35.14
1.86667	30.4933	33.24	33.5067	32.6967			35.8833	35.9	36.2267	35.11			32.64	34.4467	36.9	35.24	36.31	36.9667	35.08	34.85	36.5133	36.89	35.3367	35.17
1.88333	30.49	33.37	33.5333	32.8			35.8833	35.93	36.1967	35.1233			32.8033	34.5133	36.86	35.44	36.3333	37.0133	35.2	34.745	36.4	36.8633	35.3567	35.2
1.9	30.5567	33.5	33.57	32.8733			35.85	35.9367	36.16	35.0833			32.9	34.6	36.95	35.5633	36.3433	37.08	35.2533	34.72	36.3733	36.83	35.38	35.2167
1.91667	30.6167	33.6167	33.5967	32.8667			35.7533	35.9167	36.11	34.9467			32.8833	34.6567	36.9633	35.5133	36.3367	37.1067	35.38	34.92	36.3933	36.8033	35.41	35.2433
1.93333	30.7	33.6933	33.64	32.8467			35.6967	35.9033	36.06	34.91			32.79	34.7	36.93	35.4533	36.3033	37.1	35.4867	35.08	36.4067	36.7733	35.4367	35.2767
1.95	30.7667	33.7467	33.7	32.9933			35.6467	35.9867	36.0233	35.0567			32.82	34.7533	36.89	35.4467	36.3233	37.0833	35.5233	35.175	36.4133	36.76	35.46	35.34
1.96667	30.8133	33.79	33.7267	33.1633			35.66	36.0067	36.01	35.15			32.88	34.82	36.8667	35.4833	36.3667	37.0867	35.4433	35.18	36.4133	36.7533	35.4867	35.46
1.98333	30.7933	33.84	33.76	33.2867			35.73	35.98	36.01	35.1467			32.93	34.8367	36.8467	35.5133	36.3933	37.1	35.3867	35.215	36.4033	36.7533	35.4933	35.4733
2	30.8267	33.88	33.7967	33.4533			35.8	35.99	36.0033	35.1167			33	34.8433	36.8133	35.5267	36.4267	37.07	35.3833	35.36	36.38	36.73	35.4533	35.5433
2.01667	31.0233	33.96	33.8167	33.7			35.8533	36.0033	36.0067	35.1733			33.0933	34.83	36.8667	35.5767	36.4233	37.02	35.44	35.42	36.35	36.6767	35.4833	35.6433
2.03333	31.0833	34.06	33.8367	33.85			35.99	35.99	36.0233	35.1967			33.13	34.8533	36.9167	35.58	36.4033	36.97	35.5667	33.65	36.3133	36.65	35.58	35.71
2.05	31.0967	34.1233	33.86	33.91			36.06	35.9633	36.03	35.1433			33.1567	34.9233	36.8967	35.5533	36.3967	36.9433	35.61	33.71	36.2933	36.6267	35.66	35.7467
2.06667	31.1	34.1233	33.9	33.92			36.0833	36.0133	36.06	35.1667			33.21	34.9533	36.88	35.5133	36.3967	36.9333	35.6167	33.76	36.28	36.6233	35.69	35.7733
2.08333	31.2733	34.0867	33.9633	33.7633			36.1533	36.0267	36.12	35.2933			33.2233	34.9433	36.8567	35.5	36.4367	36.92	35.6133	33.8167	36.2733	36.5867	35.7567	35.7867
2.1	31.34	34.1033	34.0033	33.7367			36.2167	36.02	36.1367	35.29			33.1933	34.93	36.84	35.48	36.4467	36.8667	35.5967	33.8633	36.3067	36.57	35.8467	35.8033
2.11667	31.35	34.1333	34.0733	33.87			36.2567	35.9967	36.1233	35.29			33.1933	34.91	36.8367	35.5	36.4133	36.8533	35.5933	33.88	36.2833	36.6133	35.9	35.81
2.13333	31.3333	34.1733	34.1067	34.0167			36.2667	35.9333	36.1333	35.3233			33.2367	34.8867	36.79	35.5067	36.37	36.9067	35.5767	33.8133	36.09	36.6333	35.8933	35.8367
2.15	31.3567	34.2833	34.1233	33.98			36.2467	35.8667	36.1933	35.43			33.2767	34.8567	36.75	35.52	36.3667	37.05	35.57	33.81	35.9833	36.6467	35.92	35.87
2.16667	31.4267	34.3633	34.1667	33.9767			36.1833	35.86	36.1933	35.6033			33.2933	34.85	36.8067	35.51	36.3833	37.1367	35.5867	33.7967	35.8033	36.6933	35.9533	35.9233
2.18333	31.44	34.43	34.21	34.0367			36.1533	35.88	36.1867	35.6167			33.2867	34.87	36.82	35.5167	36.39	37.1667	35.61	33.8533	35.8867	36.7733	35.9933	35.9733
2.2	31.44	34.5067	34.2667	34.0833			36.1633	35.8967	36.2733	35.5933			33.29	34.91	36.7833	35.5733	36.41	37.2033	35.5867	33.94	36.14	36.7733	36.0533	36.01
2.21667	31.6667	34.5433	34.2933	34.06			36.1667	35.86	36.3333	35.6167			33.2667	34.94	36.7433	35.6133	36.43	37.2267	35.6067	34.0133	36.29	36.7367	36.06	36.0433
2.23333	31.7533	34.59	34.3033	34.0167			36.1633	35.7733	36.37	35.58			33.24	34.99	36.7533	35.6633	36.4533	37.1767	35.61	33.9633	36.3367	36.7467	35.9933	36.1167
2.25	31.7833	34.74	34.3133	34.0833			36.16	35.66	36.3567	35.6367			33.25	35.0667	36.7733	35.68	36.5033	37.2067	35.5933	34.08	36.3567	36.7133	35.9467	36.1267
2.26667	31.8433	34.84	34.3867	34.0967			36.16	35.6133	36.28	35.75			33.2633	35.08	36.7333	35.69	36.5067	37.2633	35.5833	34.1567	36.35	36.7033	36.0467	36.09
2.28333	31.93	34.9333	34.41	34.1167			36.16	35.7233	36.22	35.7067			33.2633	35.0367	36.6933	35.72	36.4667	37.3	35.5767	34.2867	36.3167	36.6967	36.13	36.1233
2.3	32.0167	35.0233	34.4367	34.25			36.17	35.78	36.3133	35.58			33.2833	35.0133	36.7767	35.7233	36.4533	37.2933	35.5767	34.4967	36.3333	36.6833	36.36	36.18
2.31667	32.1	35.0433	34.52	34.37			36.2133	36.0067	36.38	35.6167			33.32	35.13	36.8067	35.74	36.4333	37.3133	35.5833	34.66	36.4767	36.6533	36.43	36.1967
2.33333	32.0367	35.0333	34.57	34.51			36.2333	36.0733	36.4033	35.6233			33.3033	35.2033	36.78	35.74	36.4433	37.3467	35.5933	34.75	36.53	36.5867	36.45	36.23
2.35	31.97	35.04	34.5433	34.5867			36.2767	36.1233	36.4033	35.5033			33.2767	35.2233	36.7767	35.6767	36.4533	37.3667	35.5933	34.6433	36.5133	36.6333	36.5067	36.28
2.36667	32.0267	35.0567	34.5567	34.5967			36.31	36.12	36.4	35.5667			33.2767	35.1967	36.69	35.7	36.4533	37.3733	35.54	34.5533	36.4667	36.6733	36.5633	36.32
2.38333	32.1767	35.04	34.6	34.4733			36.36	36.02	36.37	35.7967			33.2767	35.17	36.6167	35.76	36.4667	37.4033	35.48	34.4967	36.4433	36.6367	36.57	36.36
2.4	32.2233	34.97	34.6533	34.4			36.3733	35.9833	36.34	35.8633			33.2833	35.2767	36.61	35.8433	36.5	37.4633	35.47	34.5167	36.45	36.6233	36.5933	36.39
2.41667	32.3533	34.8733	34.7067	34.37			36.3967	35.9933	36.3267	35.8433			33.3233	35.3133	36.6167	36.0033	36.5267	37.49	35.45	34.5233	36.46	36.6067	36.6067	36.42
2.43333	32.3067	34.8533	34.7567	34.38			36.4	35.9467	36.31	35.8033			33.3233	35.3233	36.66	36.0667	36.55	37.4867	35.4767	34.5767	36.45	36.5667	36.5733	36.47
2.45	32.34	34.8233	34.8233	34.49			36.39	35.8767	36.3067	35.8567			33.3167	35.3467	36.83	36.0933	36.55	37.51	35.4633	34.6233	36.4433	36.5467	36.59	36.49
2.46667	32.4567	34.8733	34.9267	34.5967			36.3633	35.8133	36.31	35.8667			33.3	35.3533	36.9067	36.07	36.5767	37.5333	35.4867	34.6967	36.43	36.5667	36.55	36.51
2.48333	32.5433	34.8967	34.9667	34.6267			36.35	35.7267	36.3367	35.87			33.28	35.2367	36.95	35.9967	36.6067	37.5167	35.5567	34.9533	36.4367	36.61	36.4967	36.52
2.5	32.5933	34.9467	34.9767	34.8433			36.3267	35.69	36.3367	35.9367			33.27	35.22	36.9433	35.96	36.5733	37.4767	35.6133	35.1933	36.4667	36.6367	36.51	36.52
2.51667	32.6767	35.01	35.0033	34.94			36.32	35.7467	36.3433	35.93			33.28	35.2233	36.93	35.9	36.4433	37.4433	35.6933	35.34	36.4567	36.6633	36.5467	36.5067
2.53333	32.76	34.9867	35.0267	34.7633			36.3267	35.79	36.3433	35.8567			33.3033	35.2067	36.9167	35.8967	36.4467	37.42	35.74	35.4267	36.4567	36.71	36.5933	36.49
2.55	32.8433	34.9633	35.0733	34.7633			36.3167	35.8067	36.3567	35.8167			33.3733	35.16	36.8767	36.0067	36.5733	37.43	35.7533	35.4833	36.5167	36.7333	36.6267	36.4467
2.56667	32.91	35.0133	35.12	34.86			36.3033	35.8133	36.3967	35.8367			33.44	35.1333	36.8367	36.0167	36.6133	37.46	35.7233	35.52	36.5267	36.7033	36.59	36.4467
2.58333	32.9533	35.06	35.15	34.8767			36.2133	35.8433	36.4133	35.8233			33.4867	35.1333	36.7933	35.9433	36.5733	37.4733	35.56	35.5833	36.53	36.65	36.55	36.5033
2.6	32.94	35.0833	35.1567	35.0333			36.1067	35.8433	36.42	35.8133			33.51	35.09	36.7733	35.8967	36.49	37.4767	35.4567	35.6767	36.5333	36.6267	36.62	36.5167
2.61667	32.9633	35.1567	35.1867	35.2333			36.0333	35.7933	36.4167	35.8667			33.5367	35.04	36.7667	35.92	36.42	37.4933	35.5533	35.75	36.51	36.6567	36.7667	36.5833
2.63333	33.0033	35.23	35.3267	35.2667			35.9667	35.7067	36.4233	35.9667			33.5633	35.2067	36.7633	35.9467	36.42	37.5233	35.6433	35.86	36.4767	36.65	36.7767	36.6667
2.65	33.03	35.2633	35.43	35.2			36.0067	35.7	36.4667	36.12			33.5733	35.26	36.7833	35.9667	36.4767	37.5233	35.65	35.89	36.4733	36.5633	36.6167	36.7167
2.66667	33.0667	35.2867	35.49	35.22			36.0467	35.7667	36.48	36.31			33.5833	35.25	36.8133	36.0067	36.5367	37.5	35.6333	35.74	36.5833	36.5433	36.47	36.8067
2.68333	33.1233	35.3767	35.4933	35.19			36.0833	35.78	36.4667	36.35			33.61	35.23	36.83	36.0767	36.5433	37.4933	35.6167	35.64	36.66	36.6133	36.4133	36.8667
2.7	33.13	35.4733	35.4833	35.09			36.17	35.7667	36.54	36.3533			33.6233	35.32	36.7933	36.06	36.5	37.4933	35.62	35.7267	36.6767	36.7	36.44	36.86
2.71667	33.1733	35.5267	35.5067	35.0367			36.3533	35.7733	36.5733	36.35			33.6233	35.3333	36.7567	36.0267	36.49	37.4567	35.6567	35.9133	36.63	36.74	36.4367	36.8567
2.73333	33.3167	35.4167	35.5133	35.14			36.3567	35.8133	36.5767	36.34			33.6533	35.3	36.6633	36.0067	36.5267	37.4333	35.7067	36.1167	36.6533	36.76	36.4333	36.8633
2.75	33.4967	35.3433	35.4667	35.25			36.3433	35.8467	36.5833	36.32			33.76	35.2933	36.6033	36.02	36.6667	37.4433	35.7233	36.1867	36.69	36.7533	36.41	36.8667
2.76667	33.7767	35.4333	35.4667	35.4067			36.31	35.88	36.57	36.25			33.8133	35.2967	36.6167	36.0467	36.71	37.4333	35.7267	36.1467	36.7	36.7733	36.3767	36.87
2.78333	34.02	35.4733	35.5	35.4033			36.0933	35.8833	36.5333	36.2167			33.8267	35.26	36.62	36.0567	36.7133	37.41	35.7233	36.1567	36.6933	36.77	36.3667	36.8467
2.8	34.1167	35.5067	35.5133	35.3233			36.0933	35.8633	36.4967	36.19			33.8133	35.1667	36.6167	36.0267	36.7067	37.3733	35.7167	36.1133	36.6833	36.7433	36.27	36.8533
2.81667	34.1667	35.53	35.51	35.2667			36.1367	35.8567	36.47	36.17			33.7967	35.0867	36.65	36.0367	36.7233	37.3467	35.7267	36.0767	36.6833	36.7733	36.1533	36.8867
2.83333	34.2767	35.54	35.5867	35.21			36.17	35.7933	36.44	36.1567			33.76	35.0233	36.66	36.16	36.74	37.38	35.7067	36.0633	36.6533	36.84	36.17	36.8767
2.85	34.3067	35.57	35.6167	35.17			36.1467	35.7167	36.3467	36.1333			33.7433	35.01	36.6633	36.2333	36.7467	37.3833	35.5433	36.0333	36.6033	36.8867	36.1967	36.86
2.86667	34.21	35.6333	35.63	35.2467			36.1467	35.7067	36.36	36.1333			33.7267	35.03	36.6633	36.2533	36.7433	37.34	35.39	36	36.5667	36.8933	36.2333	36.8567
2.88333	34.2367	35.69	35.6533	35.2567			36.2333	35.6833	36.4267	36.12			33.7133	35.1633	36.6367	36.2067	36.7567	37.3133	35.3467	36.03	36.5233	36.9067	36.2533	36.83
2.9	34.39	35.7233	35.6833	35.2533			36.2267	35.67	36.43	36.0267			33.7	35.3133	36.6433	36.1133	36.7933	37.2933	35.3467	36.0233	36.4533	36.97	36.2533	36.7667
2.91667	34.45	35.7567	35.7067	35.3533			36.2367	35.6733	36.4167	35.8933			33.6933	35.3467	36.6433	36.13	36.8067	37.28	35.4633	36.06	36.43	37.0333	36.2467	36.8667
2.93333	34.48	35.7833	35.7033	35.3867			36.2767	35.7067	36.3867	35.77			33.6767	35.3433	36.66	36.1967	36.8233	37.2667	35.4867	36.0967	36.3967	37.06	36.2633	36.8867
2.95	34.5467	35.8033	35.6867	35.43			36.3033	35.69	36.33	35.7133			33.6733	35.2967	36.67	36.2467	36.83	37.2867	35.5167	36.16	36.3833	37.08	36.2633	36.9367
2.96667	34.6233	35.8167	35.69	35.5067			36.2967	35.6833	36.2933	35.7933			33.6867	35.3233	36.6967	36.2733	36.8267	37.32	35.5333	36.2033	36.5433	37.06	36.3567	36.96
2.98333	34.66	35.83	35.7067	35.48			36.3	35.6733	36.35	36			33.7	35.34	36.6967	36.2867	36.8267	37.3267	35.5433	36.24	36.5767	37.0467	36.3467	36.9867
3	34.66	35.84	35.7133	35.3367			36.3	35.6533	36.3667	36.0867			33.7133	35.3067	36.68	36.29	36.8367	37.32	35.57	36.2267	36.5667	37.0167	36.33	37.0433
3.01667	34.5233	35.8433	35.71	35.2533			36.3667	35.6433	36.3433	36.0967			33.7133	35.2	36.68	36.2633	36.85	37.33	35.5933	36.15	36.5567	36.94	36.3633	37.1
3.03333	34.5033	35.8367	35.72	35.23			36.4133	35.7633	36.2467	36.02			33.7233	35.01	36.62	36.2833	36.8333	37.32	35.6033	36.1267	36.6033	36.8867	36.3967	37.15
3.05	34.6233	35.8733	35.71	35.1833			36.4033	35.8233	36.1167	35.9267			33.7267	34.9367	36.5333	36.2967	36.7767	37.3033	35.6067	36.1133	36.63	36.8967	36.4233	37.1633
3.06667	34.6867	35.9267	35.6667	35.14			36.3733	35.8667	36.0467	36.0033			33.7233	34.92	36.3433	36.27	36.76	37.34	35.6	36.09	36.67	36.9033	36.41	37.1167
3.08333	34.7233	35.91	35.6567	35.0667			36.35	35.9067	36.04	36.06			33.71	34.9233	36.0833	36.2767	36.8	37.3633	35.59	36.01	36.71	36.9733	36.5233	37
3.1	34.8	35.9	35.73	35.09			36.34	35.8967	36.05	35.9833			33.71	35.0533	36.13	36.2833	36.81	37.3333	35.5967	36.0233	36.7767	37.1133	36.62	37.0133
3.11667	34.85	35.86	35.7433	35.3433			36.34	35.89	36.05	35.9233			33.72	35.1767	36.3633	36.33	36.76	37.29	35.6	36.1433	36.7633	37.16	36.6267	37.07
3.13333	34.8267	35.85	35.7967	35.3567			36.34	35.8533	36.06	35.93			33.79	35.33	36.5	36.37	36.7467	37.2367	35.5933	36.21	36.67	37.1467	36.6267	37.14
3.15	34.82	35.8467	35.8633	35.29			36.35	35.83	36.0833	35.9367			33.8533	35.41	36.5067	36.38	36.7533	37.1267	35.6033	36.24	36.43	37.1167	36.62	37.17
3.16667	34.8467	35.8733	35.8933	35.32			36.3533	35.8333	36.0833	35.9633			33.89	35.3967	36.5033	36.3567	36.72	37.1233	35.6367	36.2067	36.2667	37.1233	36.61	37.15
3.18333	34.8833	35.8933	35.9133	35.4767			36.3367	35.85	36.1033	35.95			33.93	35.3333	36.5867	36.3667	36.6633	37.1233	35.6533	36.1033	36.4533	37.1433	36.5967	37.1333
3.2	34.92	35.9067	35.9367	35.6			36.32	35.8433	36.14	35.9967			33.97	35.32	36.64	36.3833	36.5567	37.1	35.67	36.07	36.5533	37.13	36.6033	37.1
3.21667	34.86	35.8867	35.94	35.6067			36.3367	35.8433	36.1333	36.09			33.99	35.3233	36.6667	36.3667	36.5633	37.1067	35.6867	36.1033	36.5433	37.1167	36.62	37.05
3.23333	34.8333	35.8767	35.9367	35.6			36.3467	35.9467	36.12	36.1333			34.0133	35.26	36.6767	36.35	36.5967	37.0867	35.6867	36.12	36.6133	37.0967	36.5733	36.9967
3.25	34.86	35.9	35.9533	35.6133			36.3333	35.97	36.1067	36.2033			34.0467	35.2067	36.64	36.35	36.61	37.04	35.6933	36.14	36.6833	37.08	36.5733	36.9433
3.26667	34.9233	35.94	35.97	35.7333			36.3233	35.99	36.0967	36.25			34.0667	35.2233	36.6333	36.3367	36.6367	36.95	35.71	36.1567	36.68	37.0733	36.58	36.93
3.28333	34.9833	35.9367	35.99	35.7733			36.3167	35.9967	36.0967	36.3033			34.0733	35.15	36.67	36.3167	36.6533	36.95	35.7233	36.1733	36.6467	37.07	36.5867	37.01
3.3	35.04	35.92	36.02	35.75			36.3067	35.9733	36.0967	36.3333			34.09	35.1633	36.6633	36.32	36.68	36.9933	35.7467	36.1767	36.6067	37.0667	36.6	37.0467
3.31667	35.0933	35.8033	36.03	35.7433			36.2967	35.9433	36.12	36.2667			34.1067	35.38	36.6267	36.3333	36.6967	37.01	35.7567	36.17	36.5767	37.0767	36.5933	37.0533
3.33333	35.1567	35.74	36.0433	35.75			36.29	35.9067	36.22	36.1367			34.1467	35.4433	36.61	36.3167	36.6533	37.0133	35.74	36.1867	36.56	37.0967	36.5867	37.0633
3.35	35.2267	35.79	36.0667	35.7533			36.34	35.8333	36.3067	36.0933			34.22	35.4633	36.63	36.2833	36.6833	37.03	35.73	36.1767	36.5633	37.11	36.5667	37.0867
3.36667	35.1067	35.85	36.0733	35.75			36.4233	35.7567	36.3433	36.1			34.2867	35.4567	36.6867	36.2667	36.7	37.02	35.73	36.12	36.59	37.14	36.55	37.1133
3.38333	34.8733	35.85	36.0533	35.7267			36.43	35.76	36.3467	36.11			34.3333	35.44	36.69	36.2467	36.6667	37.0033	35.7267	36.1267	36.5767	37.1833	36.53	37.1133
3.4	34.8833	35.9933	36.0833	35.6467			36.4333	35.7867	36.34	36.0967			34.3733	35.3867	36.69	36.1933	36.6667	36.9567	35.7167	36.1167	36.5833	37.2667	36.51	37.0833
3.41667	34.92	36.0967	36.1467	35.7533			36.4367	35.7867	36.33	36.0733			34.4067	35.3133	36.68	36.15	36.6533	36.9267	35.6967	36.11	36.62	37.2867	36.5067	37.0667
3.43333	35.04	36.1367	36.16	35.8433			36.4167	35.7733	36.32	36.0567			34.4567	35.2733	36.6767	36.1767	36.6533	36.9333	35.67	36.1333	36.6133	37.29	36.4867	37.06
3.45	35.1033	36.13	36.14	35.8767			36.3833	35.7633	36.3167	36.1233			34.4767	35.2733	36.6667	36.2033	36.6567	36.9133	35.6567	36.13	36.51	37.2867	36.4667	37.0567
3.46667	35.1167	36.1367	36.1267	35.8833			36.3467	35.76	36.32	36.1767			34.4833	35.2933	36.6367	36.23	36.6667	36.8967	35.6367	36.12	36.3867	37.33	36.4567	37.0333
3.48333	35.2433	36.1367	36.1367	35.8833			36.3367	35.75	36.3167	36.2133			34.52	35.4067	36.6167	36.27	36.74	36.9033	35.6167	36.1567	36.3133	37.3167	36.4833	37
3.5	35.3967	36.13	36.1333	35.8933			36.4233	35.7333	36.2567	36.2			34.5067	35.4267	36.5967	36.3233	36.8133	36.91	35.5867	36.2267	36.2467	37.2733	36.6867	36.9633
3.51667	35.4967	36.1133	36.12	35.8233			36.49	35.7133	36.1267	36.1633			34.42	35.4233	36.56	36.37	36.8233	36.9067	35.5767	36.2733	36.25	37.2633	36.7767	36.9233
3.53333	35.5633	36.11	36.1033	35.6633			36.4867	35.6833	36.12	36.08			34.51	35.4467	36.4567	36.38	36.8033	36.8967	35.5733	36.2833	36.2367	37.26	36.7833	36.8967
3.55	35.5767	36.12	36.0967	35.5933			36.4667	35.7067	36.19	36.09			34.6133	35.48	36.3867	36.4367	36.8033	36.9167	35.57	36.2833	36.2333	37.2267	36.77	36.8833
3.56667	35.5733	36.13	36.0933	35.5967			36.4467	35.8233	36.2	36.2967			34.6667	35.4967	36.42	36.49	36.8267	36.95	35.57	36.2767	36.2767	37.2267	36.75	36.88
3.58333	35.6367	36.11	36.08	35.5367			36.4433	35.8433	36.19	36.4267			34.77	35.5167	36.5633	36.4533	36.8367	37	35.6667	36.2633	36.3067	37.2367	36.7233	36.8733
3.6	35.6933	36.1033	36.0667	35.38			36.4467	35.8433	36.1067	36.5			34.7933	35.5233	36.5833	36.4367	36.8367	37.08	35.72	36.2	36.3467	37.23	36.7	36.88
3.61667	35.7367	36.1133	36.0533	35.3367			36.4667	35.85	35.9867	36.4767			34.7533	35.5267	36.54	36.4833	36.8333	37.1367	35.7333	36.14	36.5067	37.24	36.6733	36.8867
3.63333	35.7667	36.1133	36.0567	35.4933			36.4367	35.8433	35.9667	36.4			34.7233	35.5267	36.53	36.53	36.9067	37.1533	35.7167	36.05	36.7267	37.2133	36.65	36.89
3.65	35.8167	36.13	36.0933	35.4733			36.43	35.85	35.9833	36.3467			34.6833	35.53	36.5167	36.55	36.9067	37.13	35.7	35.9333	36.75	37.2533	36.63	36.87
3.66667	35.8567	36.1633	36.12	35.47			36.44	35.9367	36.1	36.3333			34.6133	35.5267	36.56	36.48	36.9133	37.07	35.7133	35.8833	36.7433	37.3067	36.5967	36.84
3.68333	35.9867	36.2067	36.14	35.52			36.4133	35.9767	36.2167	36.3967			34.58	35.4967	36.59	36.48	36.9733	37.0367	35.76	35.85	36.7133	37.3033	36.6067	36.8333
3.7	36.09	36.2233	36.15	35.4767			36.2667	35.9767	36.23	36.39			34.62	35.46	36.58	36.61	37.0433	37.0067	35.79	35.8367	36.69	37.28	36.6467	36.8367
3.71667	36.1767	36.25	36.1567	35.3333			36.14	35.96	36.1833	36.4			34.6633	35.46	36.59	36.6433	37.0467	36.98	35.79	35.8367	36.6433	37.23	36.66	36.8333
3.73333	36.2033	36.27	36.1667	35.3367			36.1	35.95	36.1433	36.4367			34.77	35.4733	36.62	36.6467	37.0067	36.96	35.7733	35.82	36.6067	37.1767	36.66	36.8167
3.75	36.23	36.2433	36.18	35.3467			36.1667	35.9467	36.13	36.46			34.7733	35.4867	36.55	36.6267	36.9933	37.0067	35.7467	35.7967	36.58	37.1333	36.6633	36.8067
3.76667	36.2767	36.1967	36.1867	35.3233			36.3033	35.9333	36.12	36.48			34.6933	35.5	36.5433	36.5767	36.9733	37.0433	35.72	35.7767	36.54	37.11	36.7033	36.7967
3.78333	36.3167	36.1767	36.19	35.3933			36.3233	35.8833	36.12	36.52			34.6067	35.5233	36.52	36.55	36.9433	37.0633	35.7133	35.7633	36.5	37.1267	36.7967	36.7867
3.8	36.2633	36.0533	36.2	35.46			36.2967	35.8767	36.1367	36.54			34.6567	35.5567	36.51	36.5333	36.9833	37.05	35.69	35.8167	36.46	37.1367	36.8233	36.7767
3.81667	36.12	35.93	36.2033	35.34			36.22	35.87	36.12	36.51			34.7067	35.5767	36.5833	36.58	37.0367	37.0267	35.6567	35.85	36.46	37.0767	36.8267	36.76
3.83333	35.9267	35.8867	36.19	35.2			36.1	35.8667	36.0933	36.4833			34.7333	35.5867	36.5833	36.6933	37.06	37.01	35.7067	35.8133	36.4667	37.01	36.82	36.7467
3.85	35.8933	36.0367	36.18	35.06			36.08	35.8567	36.0833	36.4967			34.7533	35.5767	36.64	36.74	37.0567	37.0167	35.71	35.6567	36.4667	36.9933	36.8833	36.7433
3.86667	35.9467	36.1567	36.1633	35.0733			36.0967	35.7967	36.1	36.4867			34.7533	35.56	36.6567	36.7267	37.04	37	35.7167	35.6267	36.4733	36.9833	36.96	36.74
3.88333	35.87	36.25	36.1033	35.16			36.27	35.7667	36.11	36.4867			34.76	35.5733	36.63	36.7333	37.0133	36.9833	35.7633	35.6433	36.4667	36.96	36.98	36.73
3.9	35.76	36.3233	36.0767	35.2867			36.3067	35.82	36.11	36.4733			34.7767	35.5733	36.5967	36.7333	37.01	36.9467	35.7967	35.6333	36.48	36.94	36.98	36.72
3.91667	35.72	36.3467	36.0767	35.3533			36.3367	35.8533	36.1	36.5133			34.7867	35.57	36.5433	36.7	37.0267	36.8633	35.8067	35.71	36.5033	36.9133	36.95	36.7133
3.93333	35.7167	36.33	36.0867	35.2267			36.4333	35.8467	36.12	36.5767			34.8033	35.56	36.4567	36.6667	37.04	36.8167	35.8067	35.85	36.5033	36.8867	36.79	36.7233
3.95	35.7233	36.3033	36.0933	35.04			36.4367	35.82	36.1233	36.57			34.8233	35.5767	36.38	36.6767	37.04	36.78	35.82	36.0233	36.47	36.8367	36.6967	36.7033
3.96667	35.8167	36.2867	36.1433	35.1033			36.3867	35.8333	36.1567	36.4567			34.8333	35.6633	36.4233	36.7133	37.0633	36.7767	35.8	36.08	36.4267	36.7467	36.73	36.67
3.98333	35.9533	36.28	36.1533	34.9667			36.4133	35.8433	36.22	36.3867			34.85	35.6667	36.4667	36.73	37.0733	36.81	35.8	36.07	36.4067	36.74	36.8633	36.64
4	36.0267	36.2767	36.1667	34.8133			36.4167	35.8267	36.2667	36.3967			34.87	35.6533	36.4733	36.7433	37.05	36.81	35.8533	36	36.3833	36.7733	36.9333	36.61
4.01667	36.05	36.2467	36.1867	34.8			36.42	35.8	36.2933	36.36			34.9	35.66	36.4667	36.7933	37.0633	36.7967	35.7967	35.9667	36.3667	36.7833	36.96	36.5767
4.03333	36.0733	36.21	36.2	34.93			36.4367	35.8033	36.3467	36.3033			34.9067	35.6567	36.7233	36.8	37.0533	36.8	35.7967	36.02	36.3467	36.77	36.9367	36.5567
4.05	36.0967	36.1967	36.2033	35.0533			36.4367	35.82	36.3733	36.1533			34.9233	35.6367	36.8867	36.8033	37.0067	36.7933	35.8833	36.0267	36.3167	36.76	36.9267	36.55
4.06667	36.12	36.1933	36.21	35.01			36.4167	35.83	36.3533	35.9867			34.9267	35.6267	36.8967	36.8067	37.01	36.7633	35.92	36.2233	36.2833	36.7267	36.9367	36.5533
4.08333	36.1233	36.22	36.2167	35.05			36.39	35.8333	36.3033	36.01			34.9267	35.5767	36.88	36.79	37.02	36.7333	35.92	36.3367	36.1233	36.73	36.92	36.5533
4.1	36.13	36.2967	36.2733	35.1633			36.3733	35.8533	36.26	36.0633			34.9167	35.46	36.8267	36.7467	36.9833	36.7233	35.8933	36.4	35.9067	36.72	36.75	36.5633
4.11667	36.1133	36.31	36.2967	35.5			36.37	35.8833	36.2533	36.0567			34.9167	35.3767	36.7933	36.7267	36.8867	36.7067	35.9033	36.3733	35.8767	36.67	36.87	36.5633
4.13333	36.0533	36.3133	36.31	35.5733			36.36	35.9433	36.2367	36.0367			34.9233	35.3633	36.75	36.73	36.8333	36.6767	35.96	36.3567	35.9667	36.6233	37.1767	36.58
4.15	35.9333	36.3133	36.3133	35.38			36.3467	36.01	36.2067	36.02			34.93	35.36	36.7033	36.72	36.9033	36.6367	35.97	36.3367	36.2667	36.62	37.2367	36.5867
4.16667	35.81	36.3033	36.3233	35.14			36.32	36.06	36.1867	35.98			34.99	35.3633	36.6867	36.6867	36.93	36.6	36.0133	36.2633	36.4133	36.63	37.2033	36.5833
4.18333	35.72	36.3	36.3233	34.9767			36.2967	36.0767	36.2167	35.9133			35.0367	35.36	36.7167	36.66	36.9767	36.56	36.1133	36.25	36.4767	36.6133	37.1667	36.57
4.2	35.7267	36.3	36.3167	34.93			36.2833	36.0867	36.25	35.85			35.0433	35.36	36.73	36.6767	36.9867	36.5233	36.1467	36.23	36.6667	36.5733	37.1267	36.54
4.21667	35.74	36.2933	36.31	35.0267			36.2667	36.0767	36.2533	35.79			35.05	35.25	36.6967	36.6967	36.9567	36.5067	36.0933	36.1433	36.7967	36.52	36.99	36.4933
4.23333	35.6867	36.29	36.3167	35.1933			36.2433	35.9967	36.23	35.7167			35.0433	35.2633	36.6867	36.71	36.94	36.5033	36.0267	36.0933	36.81	36.5133	36.8133	36.4733
4.25	35.67	36.24	36.31	35.42			36.25	35.8967	36.23	35.6967			35.0367	35.33	36.7467	36.6833	36.94	36.52	35.98	36.0567	36.6967	36.5267	36.7567	36.4733
4.26667	35.6533	36.2333	36.3067	35.6233			36.25	35.84	36.2133	35.7033			35.0033	35.3533	36.79	36.6333	36.9633	36.5233	35.95	36.0033	36.5367	36.5467	36.7467	36.4767
4.28333	35.6733	36.26	36.3267	35.73			36.2333	35.84	36.18	35.71			34.9767	35.3333	36.7933	36.6333	36.98	36.5233	35.9533	35.9467	36.4933	36.57	36.8667	36.47
4.3	35.72	36.27	36.3233	35.6967			36.22	35.8567	36.1467	35.75			34.99	35.36	36.7933	36.6133	36.9867	36.5933	35.9533	35.8967	36.4567	36.5633	36.9367	36.4567
4.31667	35.8467	36.27	36.2867	35.6667			36.1967	35.8667	36.1167	35.82			34.9933	35.4667	36.7967	36.61	36.9833	36.6233	35.9167	35.85	36.3867	36.5433	36.9633	36.4367
4.33333	35.87	36.2733	36.2367	35.61			36.1733	35.87	36.0967	35.8367			34.95	35.5567	36.7967	36.63	36.97	36.6033	35.9033	35.8	36.52	36.53	36.9433	36.4133
4.35	35.91	36.3567	36.2933	35.3867			36.1667	35.89	36.0633	35.8433			34.9567	35.5833	36.8167	36.6733	36.9533	36.6133	35.9033	35.7667	36.6033	36.5333	36.92	36.4133
4.36667	35.94	36.35	36.3233	35.15			36.17	35.89	36.0367	35.8533			35.0167	35.5867	36.8033	36.71	36.9233	36.6333	35.95	35.7367	36.64	36.57	36.9333	36.4267
4.38333	35.95	36.3467	36.2867	35.1067			36.17	35.9	36.0167	35.9067			35.06	35.63	36.78	36.7267	36.9	36.66	35.9433	35.7267	36.6467	36.61	36.9133	36.4333
4.4	35.9733	36.3567	36.2533	35.0267			36.1433	35.8933	35.98	35.9133			35.0533	35.6167	36.81	36.69	36.88	36.6933	35.9233	35.87	36.6667	36.6667	36.87	36.4633
4.41667	36.0167	36.32	36.25	35.0533			36.1	35.89	35.9433	35.9333			35.05	35.58	36.8467	36.62	36.86	36.7967	35.9467	35.9467	36.73	36.7267	36.8533	36.5267
4.43333	36.0367	36.2467	36.2667	35.22			36.09	35.8967	35.9433	35.94			35.0433	35.55	36.8133	36.5767	36.8567	36.8667	36.0067	35.96	36.75	36.7833	36.79	36.5467
4.45	36.06	36.2367	36.2933	35.36			36.0833	35.9133	35.98	35.9333			35.0533	35.57	36.8	36.58	36.87	36.9567	36.03	35.95	36.76	36.7967	36.74	36.5733
4.46667	36.0833	36.2433	36.29	35.37			36.0267	35.9	35.98	35.8633			35.1067	35.5967	36.8033	36.6	36.8833	36.9567	36.03	35.95	36.7667	36.79	36.8133	36.61
4.48333	36.12	36.2433	36.2433	35.2067			35.95	35.88	35.9367	35.7467			35.1233	35.5967	36.78	36.6233	36.8867	36.9833	36.01	35.9367	36.7733	36.73	36.9533	36.62
4.5	36.1533	36.2533	36.1767	35.1733			35.9333	35.9	35.8933	35.7367			35.11	35.5833	36.7267	36.6233	36.8767	37.0633	35.9867	35.9667	36.7867	36.6633	36.98	36.58
4.51667	36.1833	36.22	36.1167	35.1533			35.9133	35.9	35.7967	35.8267			35.11	35.5733	36.6967	36.6267	36.8433	37.12	35.9933	35.95	36.77	36.63	36.99	36.5533
4.53333	36.23	36.08	36.0867	35.1767			35.9467	35.87	35.7533	35.8967			35.0667	35.5533	36.68	36.6033	36.8567	37.1367	36	35.95	36.76	36.65	37.0467	36.5233
4.55	36.2633	36.0233	36.1767	35.3			36.0367	35.92	35.7767	36.0033			35.0533	35.56	36.6633	36.63	36.8567	37.1433	35.9967	36	36.7567	36.66	37.0967	36.46
4.56667	36.2833	36.05	36.3533	35.4333			36.0633	35.94	35.93	36.07			35.0133	35.5867	36.6367	36.65	36.8467	37.14	35.99	36.1767	36.75	36.6433	37.19	36.4067
4.58333	36.2933	36.2267	36.41	35.5			36.07	35.9233	35.9967	36.08			34.9333	35.5867	36.61	36.6367	36.85	37.1567	35.9733	36.3433	36.76	36.7133	37.1967	36.3767
4.6	36.31	36.31	36.4133	35.4367			35.9433	35.9133	35.9633	35.9633			34.89	35.5933	36.5967	36.6467	36.8433	37.17	35.95	36.43	36.7367	36.7633	37.1733	36.3533
4.61667	36.3267	36.33	36.4033	35.34			35.9967	35.8967	35.88	35.7633			34.9667	35.6367	36.5967	36.6333	36.83	37.1933	35.9767	36.4567	36.7567	36.7567	37.08	36.3767
4.63333	36.3267	36.3067	36.4733	35.3233			36.0533	35.8667	35.9667	35.64			34.97	35.66	36.59	36.63	36.8	37.2167	36.01	36.4433	36.7567	36.7167	36.9633	36.4433
4.65	36.3433	36.2933	36.5533	35.4333			36.0867	35.9	36.0533	35.64			34.91	35.6833	36.5733	36.61	36.7567	37.2133	36.0067	36.4267	36.7133	36.67	36.9367	36.51
4.66667	36.37	36.3033	36.5567	35.6967			36.1133	35.9133	36.11	35.75			34.8767	35.6633	36.5933	36.6067	36.7667	37.2133	35.9867	36.4433	36.6433	36.6	36.9167	36.55
4.68333	36.39	36.28	36.56	35.7767			36.1433	35.8867	36.18	35.7567			34.8567	35.5933	36.6667	36.61	36.7867	37.2067	35.9733	36.47	36.61	36.5433	36.8633	36.5167
4.7	36.4033	36.2467	36.61	35.74			36.1767	35.83	36.19	35.7167			34.8433	35.5633	36.68	36.5933	36.7867	37.1867	36.0233	36.48	36.58	36.49	36.81	36.4433
4.71667	36.4167	36.28	36.5567	35.78			36.1567	35.8167	36.17	35.7833			34.8467	35.57	36.6933	36.5367	36.7767	37.1767	36.0067	36.47	36.5767	36.4633	36.7633	36.45
4.73333	36.41	36.3667	36.5567	35.8267			36.1	35.84	36.1533	35.9233			34.84	35.5433	36.7433	36.48	36.7467	37.1633	35.9633	36.4367	36.6233	36.4667	36.7333	36.53
4.75	36.3733	36.4367	36.7167	35.8433			36.02	35.8733	36.19	35.8933			34.8267	35.4867	36.7467	36.4667	36.73	37.1333	35.98	36.39	36.6367	36.4733	36.7	36.69
4.76667	36.34	36.4567	36.8833	35.8233			35.9833	35.87	36.21	35.9133			34.8133	35.4733	36.7167	36.49	36.7133	37.12	36	36.3367	36.61	36.47	36.6733	36.77
4.78333	36.3167	36.3967	36.9267	35.8267			35.93	35.8667	36.23	35.9033			34.8033	35.49	36.7133	36.5167	36.6767	37.1133	36.0167	36.3033	36.5633	36.4733	36.6567	36.7933
4.8	36.31	36.2733	36.9133	35.83			36.1067	35.87	36.2233	35.8333			34.7967	35.52	36.7333	36.55	36.6467	37.09	36.0067	36.2767	36.5233	36.4633	36.6667	36.8067
4.81667	36.3067	36.2567	36.9533	35.78			36.2333	35.87	36.1933	35.7867			34.7967	35.5367	36.76	36.58	36.6333	37.0833	36.0367	36.2533	36.4667	36.4433	36.6633	36.8233
4.83333	36.27	36.2233	37.0433	35.8833			36.24	35.85	36.11	35.77			34.7967	35.5333	36.73	36.6267	36.6267	37.08	36.0467	36.2333	36.4467	36.4	36.6533	36.8
4.85	36.2367	36.2233	37.1	35.98			36.2233	35.8533	36	35.8267			34.8133	35.5233	36.6633	36.6433	36.6	37.0833	36.0533	36.2133	36.47	36.3633	36.6433	36.7533
4.86667	36.2667	36.2833	37.0467	36.02			36.2167	35.9	35.97	35.8433			34.82	35.5067	36.5833	36.67	36.62	37.08	36.0233	36.1867	36.54	36.3367	36.6467	36.7133
4.88333	36.2767	36.2467	36.92	36.0567			36.1933	35.8833	36.0367	35.8467			34.7967	35.4033	36.5367	36.6833	36.6833	37.0867	36.0133	36.19	36.5967	36.3467	36.6667	36.72
4.9	36.31	36.1667	36.8467	36.0833			36.1567	35.8233	36.2867	35.89			34.8	35.3167	36.5367	36.6867	36.6933	37.0567	36.0233	36.2033	36.64	36.39	36.6833	36.7267
4.91667	36.3433	36.1533	36.8167	36.0667			36.2467	35.84	36.4267	35.8967			34.8	35.3367	36.5333	36.6667	36.6633	37.0233	36.0333	36.19	36.69	36.45	36.68	36.7
4.93333	36.3633	36.1533	36.8033	36.1067			36.26	35.8767	36.3667	35.9067			34.79	35.48	36.5133	36.6733	36.7067	37.01	36.07	36.1567	36.6867	36.4833	36.6233	36.71
4.95	36.3933	36.1633	36.7967	36.1267			36.25	35.8567	36.2967	35.8867			34.78	35.5167	36.45	36.6767	36.78	37.0067	36.0567	36.14	36.66	36.5067	36.5567	36.7167
4.96667	36.4133	36.2233	36.82	36.1267			36.2467	35.84	36.3033	35.9			34.7867	35.5133	36.4033	36.7167	36.7667	36.9867	36.03	36.1267	36.6133	36.5	36.53	36.6967
4.98333	36.43	36.2633	36.9767	36.1267			36.21	35.8633	36.37	35.9733			34.7833	35.5033	36.3867	36.7633	36.74	36.94	35.99	36.11	36.6067	36.4933	36.53	36.66
5	36.46	36.2633	36.9867	36.11			36.08	35.8533	36.3933	36.2533			34.78	35.5033	36.4267	36.8133	36.71	36.9033	35.94	36.0967	36.6433	36.51	36.5267	36.6267
5.01667	36.47	36.2633	36.96	36.0967			36.0233	35.85	36.3567	36.41			34.7833	35.49	36.4533	36.79	36.6867	36.87	35.9133	36.08	36.6433	36.51	36.52	36.5867
5.03333	36.4833	36.2833	36.9567	36.0733			36.0367	35.7733	36.2833	36.4467			34.7367	35.4467	36.45	36.7267	36.67	36.8233	35.87	36.06	36.6367	36.4867	36.5133	36.54
5.05	36.4867	36.2833	36.95	36.0633			36.0133	35.7067	36.26	36.3767			34.7233	35.47	36.4367	36.69	36.68	36.7633	35.7167	36.0433	36.6067	36.4533	36.5067	36.4833
5.06667	36.4633	36.2767	36.93	36.0567			36.0067	35.6967	36.25	36.3433			34.7567	35.49	36.4333	36.6167	36.73	36.7167	35.64	36.0567	36.56	36.4467	36.5	36.42
5.08333	36.3	36.2667	36.89	35.9567			36.0033	35.7367	36.23	36.32			34.9767	35.5967	36.4167	36.6033	36.82	36.6867	35.63	36.0567	36.5167	36.4067	36.4967	36.39
5.1	36.2	36.2367	36.8133	35.7633			35.9667	35.8133	36.1967	36.21			35.07	35.6	36.3967	36.5933	36.86	36.67	35.62	36.0633	36.4967	36.3567	36.4867	36.3833
5.11667	36.2233	36.22	36.78	35.5			35.9133	35.8367	36.18	36.0833			35.0733	35.5633	36.4067	36.57	36.8833	36.6333	35.6067	36.07	36.6067	36.3867	36.48	36.3567
5.13333	36.3	36.2133	36.7833	35.3			35.8867	35.7767	36.1667	36.0167			35.1233	35.5967	36.43	36.57	36.8733	36.6033	35.6	36.0533	36.64	36.4233	36.47	36.3233
5.15	36.2833	36.25	36.75	35.3233			35.85	35.6733	36.1567	36.1367			35.1633	35.63	36.4367	36.5667	36.8433	36.5733	35.5933	36.04	36.62	36.4333	36.4433	36.29
5.16667	36.3033	36.28	36.7367	35.46			35.7933	35.6633	36.1333	36.0933			35.1667	35.6267	36.4533	36.5733	36.8333	36.5367	35.6133	36.0333	36.5933	36.47	36.4533	36.2833
5.18333	36.2667	36.2967	36.71	35.5633			35.73	35.7433	36.0933	35.9967			35.17	35.6133	36.45	36.6133	36.8467	36.53	35.6267	36.0067	36.56	36.4833	36.47	36.29
5.2	36.2667	36.3133	36.6667	35.5633			35.7733	35.7367	36.0733	35.9067			35.18	35.63	36.4633	36.6267	36.8567	36.52	35.5733	36.0133	36.5167	36.5033	36.4733	36.2967
5.21667	36.2833	36.35	36.6233	35.64			35.9	35.75	36.0633	35.9367			35.19	35.7133	36.48	36.6867	36.85	36.5033	35.5367	36.0333	36.4767	36.54	36.47	36.3033
5.23333	36.2733	36.35	36.6133	35.7067			35.9167	35.88	36.0567	36.02			35.18	35.78	36.4967	36.78	36.8	36.5033	35.52	36.0167	36.4567	36.5967	36.4833	36.3067
5.25	36.3667	36.3633	36.61	35.7533			35.9433	35.93	36.0467	36.0533			35.1233	35.6467	36.58	36.7933	36.78	36.4867	35.5067	35.99	36.4433	36.64	36.5367	36.3167
5.26667	36.4833	36.3933	36.61	35.79			36.2033	35.93	36.0333	36.0367			35.0833	35.6833	36.6267	36.7433	36.7433	36.47	35.47	35.98	36.4233	36.65	36.54	36.32
5.28333	36.53	36.39	36.6033	35.8133			36.3933	35.9167	36.0133	36.02			35.13	35.78	36.6133	36.6267	36.6733	36.4633	35.4333	36.0333	36.3933	36.6733	36.4867	36.3233
5.3	36.5667	36.3967	36.6133	35.7867			36.4733	35.8867	36.01	36.04			35.1367	35.7567	36.6	36.6033	36.6467	36.4567	35.3167	36.0433	36.3567	36.7033	36.3967	36.32
5.31667	36.59	36.4067	36.62	35.7533			36.4833	35.8433	36.0133	36.0633			35.1633	35.6033	36.6033	36.59	36.6867	36.45	35.27	36.0733	36.32	36.72	36.3167	36.3467
5.33333	36.6267	36.4233	36.6233	35.7267			36.49	35.8467	36.01	36.0867			35.2267	35.4933	36.59	36.5967	36.7367	36.44	35.2567	36.1667	36.2967	36.73	36.3067	36.3533
5.35	36.66	36.4467	36.6333	35.69			36.5267	35.8667	36.0133	36.11			35.2533	35.4733	36.5767	36.63	36.7667	36.4233	35.26	36.2167	36.2833	36.6933	36.29	36.3167
5.36667	36.6833	36.4633	36.63	35.6567			36.4833	35.8667	36.0233	36.1133			35.2933	35.46	36.56	36.7233	36.78	36.41	35.2567	36.2233	36.2833	36.6233	36.2833	36.2633
5.38333	36.7	36.46	36.6267	35.6167			36.4667	35.8667	36.0333	36.0867			35.32	35.49	36.52	36.79	36.8	36.39	35.2367	36.2233	36.3133	36.5833	36.28	36.2567
5.4	36.7067	36.4233	36.6133	35.5267			36.6133	35.86	36.0367	36.1033			35.3167	35.6467	36.4733	36.8567	36.8433	36.3633	35.2267	36.24	36.2967	36.5167	36.2767	36.2433
5.41667	36.6967	36.3467	36.5867	35.36			36.6833	35.8633	36.0367	36.1467			35.2867	35.67	36.46	36.9067	36.8767	36.35	35.2333	36.2867	36.2867	36.47	36.2667	36.2533
5.43333	36.6733	36.2433	36.5633	35.3333			36.6533	35.8767	36.0367	36.1667			35.34	35.69	36.45	36.93	36.8567	36.36	35.2233	36.28	36.3033	36.4667	36.26	36.2733
5.45	36.67	36.2233	36.5267	35.3467			36.66	35.8733	36.03	36.1667			35.28	35.75	36.42	36.9467	36.85	36.3667	35.2133	36.22	36.3167	36.4533	36.2667	36.3167
5.46667	36.66	36.2867	36.5167	35.3867			36.72	35.8533	36.0233	36.1333			35.2267	35.7967	36.3967	36.9733	36.89	36.36	35.2067	36.2367	36.3633	36.4333	36.2767	36.3467
5.48333	36.6467	36.3233	36.5467	35.4933			36.7167	35.77	36.0233	36.1233			35.2167	35.6833	36.3867	36.9667	36.8967	36.3533	35.2167	36.23	36.37	36.68	36.2667	36.3933
5.5	36.6333	36.39	36.5933	35.5433			36.6933	35.7267	35.99	36.0967			35.2	35.5467	36.3933	36.9167	36.87	36.3433	35.2067	36.1367	36.3633	36.635	36.2533	36.3933
5.51667	36.62	36.4467	36.6167	35.5567			36.6833	35.7067	36.0133	36.0333			35.1767	35.5567	36.3867	36.8067	36.8033	36.3367	35.2	36	36.3633	36.565	36.24	36.3733
5.53333	36.5933	36.4833	36.6367	35.5333			36.6533	35.6767	36.0267	35.9667			35.1567	35.48	36.3667	36.75	36.8033	36.3333	35.2	35.9767	36.3567	36.485	36.2267	36.3933
5.55	36.5367	36.5167	36.6433	35.48			36.5267	35.7233	36.0067	35.87			35.1233	35.45	36.36	36.7433	36.8	36.32	35.19	36.0567	36.3167	36.44	36.2133	36.4467
5.56667	36.48	36.5333	36.6467	35.55			36.4367	35.7633	36	35.8733			35.1	35.4467	36.3633	36.7133	36.79	36.33	35.22	36.13	36.2833	36.415	36.1967	36.4867
5.58333	36.5333	36.5367	36.6467	35.59			36.3967	35.76	36.0033	35.8767			35.1	35.4267	36.4133	36.6733	36.7433	36.33	35.27	36.2467	36.2433	36.22	36.17	36.4833
5.6	36.5567	36.5667	36.63	35.63			36.38	35.7633	36	35.8633			35.0833	35.4	36.4333	36.6633	36.7067	36.3333	35.2833	36.3233	36.2333	36.2233	36.1467	36.46
5.61667	36.5067	36.6033	36.5833	35.6933			36.38	35.8433	35.9633	35.8533			35.07	35.3767	36.43	36.67	36.7267	36.33	35.2867	36.3367	36.17	36.24	36.1067	36.45
5.63333	36.4967	36.56	36.5667	35.63			36.4233	35.94	35.91	35.8733			35.0567	35.3867	36.4733	36.6833	36.74	36.3133	35.3333	36.3967	36.15	36.2933	36.0667	36.4333
5.65	36.53	36.57	36.6133	35.6033			36.4567	35.9367	35.8567	35.8567			35.0433	35.4133	36.46	36.7233	36.8633	36.3267	35.34	36.42	36.1533	36.3433	36.0667	36.4267
5.66667	36.6067	36.53	36.6633	35.6933			36.43	35.8967	35.86	35.73			35.0367	35.4233	36.4833	36.7533	36.9533	36.3533	35.2967	36.4233	36.1833	36.37	36.13	36.43
5.68333	36.6467	36.49	36.7033	35.59			36.39	35.8733	35.8833	35.6867			35.0233	35.4267	36.5467	36.7633	36.9433	36.4167	35.3133	36.5033	36.2033	36.3667	36.1533	36.3633
5.7	36.6733	36.4833	36.71	35.3733			36.39	35.8933	35.89	35.6633			35.02	35.42	36.5567	36.7633	36.9067	36.43	35.41	36.6633	36.2133	36.34	36.1533	36.3133
5.71667	36.68	36.4267	36.7067	35.2867			36.41	35.9	35.8933	35.6467			35.0467	35.4167	36.5367	36.75	36.8733	36.4333	35.4167	36.6967	36.2033	36.3433	36.1133	36.2833
5.73333	36.6833	36.3433	36.6933	35.38			36.43	35.8933	35.9867	35.69			35.04	35.4033	36.4633	36.78	36.85	36.4067	35.4133	36.6767	36.18	36.3333	36.15	36.2633
5.75	36.6933	36.3167	36.6767	35.6067			36.4467	35.91	36.0333	35.7033			35.0267	35.4267	36.36	36.8	36.82	36.3867	35.4067	36.6933	36.16	36.3467	36.1933	36.25
5.76667	36.7067	36.3767	36.65	35.6567			36.4433	35.92	36.04	35.68			35.0333	35.4467	36.3233	36.8533	36.7933	36.4	35.4467	36.6967	36.15	36.3567	36.24	36.2533
5.78333	36.73	36.3767	36.6267	35.73			36.42	35.9433	36.0367	35.6367			35.07	35.4433	36.2767	36.9433	36.7467	36.44	35.4633	36.6667	36.15	36.39	36.2833	36.2733
5.8	36.7367	36.3533	36.6167	35.6633			36.3833	35.9967	36.0433	35.6633			35.1	35.4467	36.2033	36.9533	36.7067	36.49	35.4467	36.6467	36.15	36.3933	36.2733	36.3
5.81667	36.7367	36.4467	36.62	35.5833			36.3533	35.9633	36.0433	35.7133			35.1233	35.5933	36.1933	36.9533	36.6667	36.5067	35.4367	36.6033	36.1333	36.3833	36.26	36.31
5.83333	36.7433	36.5	36.6167	35.5367			36.34	35.9667	36.0233	35.9133			35.14	35.6467	36.2	37.0233	36.67	36.57	35.44	36.5533	36.1033	36.3967	36.28	36.29
5.85	36.7633	36.5033	36.61	35.5			36.3233	36.0167	35.9933	36			35.15	35.6533	36.22	37.0167	36.6967	36.62	35.43	36.5	36.08	36.4167	36.2667	36.2667
5.86667	36.78	36.4867	36.6033	35.4033			36.2967	36.0467	35.9733	35.9667			35.1667	35.64	36.36	36.9733	36.79	36.6467	35.4233	36.4633	36.0667	36.43	36.24	36.25
5.88333	36.78	36.45	36.6	35.3067			36.2733	36.0733	35.9567	35.9833			35.1567	35.6	36.49	37.01	36.8033	36.6767	35.43	36.39	36.06	36.4333	36.21	36.2667
5.9	36.77	36.44	36.5967	35.3833			36.2567	36.0833	35.9367	35.9933			35.1367	35.5767	36.49	36.9933	36.8167	36.6833	35.4333	36.3867	36.0567	36.4433	36.1833	36.3
5.91667	36.7633	36.42	36.5833	35.4067			36.2333	36.06	35.9133	36			35.1533	35.5833	36.46	36.9467	36.83	36.72	35.4367	36.4033	36.04	36.4233	36.14	36.26
5.93333	36.7567	36.43	36.5467	35.4567			36.21	36.0367	35.89	36.0667			35.1567	35.5833	36.4633	36.8667	36.8433	36.8	35.46	36.3667	36.0267	36.4167	36.1567	36.1667
5.95	36.73	36.4633	36.52	35.53			36.1767	36	35.8767	36.1267			35.1533	35.5733	36.4933	36.84	36.85	36.8167	35.5133	36.3667	36	36.42	36.1733	36.09
5.96667	36.6733	36.4967	36.5067	35.6533			36.1633	35.97	35.8667	36.17			35.1767	35.5833	36.4833	36.8033	36.8533	36.7967	35.5267	36.3733	35.9633	36.3833	36.1833	36.2
5.98333	36.64	36.5133	36.5	35.6433			36.16	35.9467	35.89	36.2			35.1633	35.6167	36.48	36.79	36.85	36.7567	35.5267	36.3633	35.94	36.3167	36.1867	36.29
6	36.63	36.5267	36.4733	35.6933			36.1567	35.9433	35.9133	36.1867			35.1933	35.6033	36.4733	36.8833	36.8467	36.74	35.5067	36.3433	35.97	36.2667	36.2033	36.31

## Sheet: PirtCre AMG517
Time	Trpv1fl/fl-AMG							Trpv1fl/fl-Veh							PirtCre;Trpv1fl/fl-AMG							PirtCre;Trpv1fl/fl-Veh
	Q234	Q235	Q261	R274	S025			Q234	Q235	Q261	R274	S025			Q233	Q259	Q260	R275	R277	S023	S024	Q233	Q259	Q260	R275	R277	S023	S024
-1	36.5133	34.9967	35.2867	35.02	35.9833			35.4867	34.87	35.2167	35.54	34.6233			34.7767	35.7867	35.12	35.4533	36.16	35.5933	35.93	35.5067	35.83	35.4167	35.1733	36.33	35.36	36.5567
-0.983333	36.3767	34.9733	35.3033	35.03	35.97			35.4367	34.8333	35.1833	35.4667	34.6133			34.7733	35.82	35.1433	35.3733	36.1333	35.6133	35.9067	35.5033	35.84	35.3667	35.1533	36.3567	35.3333	36.69
-0.966667	36.3133	34.95	35.3067	34.98	35.96			35.44	34.7833	35.1833	35.4633	34.59			34.7533	35.92	35.0933	35.2933	36.1333	35.6167	35.8567	35.4267	35.8467	35.5067	35.1467	36.3433	35.3	36.75
-0.95	36.2833	34.9533	35.3167	34.93	35.9367			35.5433	34.7	35.2333	35.5567	34.5733			34.7233	36.01	35.0533	35.17	36.1533	35.6167	35.71	35.2867	35.84	35.59	35.0967	36.29	35.2667	36.7867
-0.933333	36.2567	34.93	35.3167	34.8767	35.9133			35.6	34.6733	35.25	35.4867	34.5667			34.69	36.0767	35.02	35.1067	36.13	35.6067	35.6333	35.1767	35.7833	35.5867	35.04	36.2233	35.36	36.8067
-0.916667	36.22	34.8867	35.3067	34.8367	35.9033			35.62	34.6633	35.25	35.4067	34.55			34.6633	36.1267	35.0267	35.0433	36.0633	35.5867	35.7367	35.1167	35.7267	35.53	35.0633	36.2133	35.3767	36.76
-0.9	36.2067	34.8867	35.3033	34.7967	35.8433			35.6433	34.6667	35.2433	35.5	34.5533			34.6467	36.17	35.0533	35.0833	35.99	35.61	35.8667	35.09	35.7133	35.4533	35.14	36.2667	35.3567	36.6933
-0.883333	36.1767	34.8967	35.2933	34.7533	35.7267			35.66	34.6767	35.23	35.5867	34.5033			34.6267	36.1667	35.11	35.2033	35.95	35.6967	35.9767	35.0733	35.7433	35.3267	35.2133	36.2867	35.3467	36.69
-0.866667	36.2833	34.93	35.3067	34.7	35.7667			35.6667	34.6533	35.2133	35.64	34.3267			34.6133	36.1367	35.1167	35.2533	35.9933	35.72	36.0167	35.0833	35.7467	35.3533	35.3	36.2333	35.3633	36.57
-0.85	36.3	35.0033	35.3167	34.65	35.79			35.6567	34.63	35.22	35.6233	34.3867			34.62	36.09	35.1533	35.24	35.94	35.7167	36.0233	35.12	35.7367	35.4733	35.37	36.2067	35.3533	36.4867
-0.833333	36.3067	35.03	35.2833	34.5967	35.77			35.6367	34.61	35.23	35.5767	34.4433			34.6267	36.0433	35.2033	35.1933	35.86	35.69	36.07	35.1067	35.7367	35.5933	35.43	36.1767	35.3367	36.45
-0.816667	36.3267	35.0467	35.2467	34.57	35.7133			35.6033	34.5833	35.2333	35.5533	34.5333			34.6233	35.9833	35.2067	35.1633	35.8733	35.6433	35.9567	35.0733	35.7367	35.7367	35.5467	36.1633	35.3067	36.32
-0.8	36.2733	35.0567	35.2167	34.5667	35.6567			35.5667	34.5533	35.2333	35.5767	34.6733			34.6233	35.9267	35.22	35.1467	35.8567	35.6033	36.01	35.0833	35.6767	35.7933	35.6033	36.18	35.2833	36.21
-0.783333	36.2167	35.0533	35.1933	34.6133	35.83			35.55	34.4933	35.2467	35.61	34.7267			34.62	35.8833	35.2	35.1133	35.82	35.5833	36.05	35.0667	35.6233	35.8067	35.63	36.1567	35.2733	36.2233
-0.766667	36.1967	35.0567	35.17	34.82	36.0233			35.5267	34.4433	35.2767	35.6267	34.7567			34.62	35.8333	35.18	35.1067	35.83	35.6033	36.01	35.0133	35.57	35.8033	35.7	36.09	35.27	36.2133
-0.75	36.1933	35.0333	35.15	34.8867	36.1033			35.5033	34.4467	35.2867	35.6667	34.8533			34.67	35.81	35.1633	35.0933	35.86	35.6233	36.0667	34.9767	35.5167	35.7633	35.7267	36.0067	35.27	36.1867
-0.733333	36.2167	34.98	35.1333	34.8933	36.1767			35.4467	34.4333	35.29	35.63	34.86			34.7733	35.8	35.1433	35.0433	35.89	35.6433	36.0767	34.9467	35.4767	35.74	35.67	35.9533	35.3467	36.1633
-0.716667	36.1967	34.96	35.1033	34.8933	36.18			35.4267	34.4333	35.2767	35.5833	34.9167			34.7933	35.79	35.13	34.9133	35.91	35.7033	36.1	34.87	35.4367	35.6767	35.57	35.9833	35.3767	36.28
-0.7	36.1567	34.9433	35.0833	34.9533	36.1067			35.5867	34.4333	35.2967	35.6	34.9667			34.8133	35.7667	35.1333	34.7933	35.9367	35.7367	36.1033	34.8367	35.4133	35.6767	35.4767	36.01	35.3833	36.4267
-0.683333	36.1433	34.9333	35.0633	34.9733	36.0533			35.6033	34.5433	35.3033	35.6033	34.98			34.8167	35.7467	35.1233	34.7333	36	35.7367	36.0767	34.82	35.38	35.7467	35.4367	36.0133	35.3567	36.4467
-0.666667	36.1267	34.93	35.0433	34.9967	35.98			35.5633	34.8967	35.28	35.5933	34.9567			34.8367	35.7333	35.0933	34.76	36.0833	35.7467	35.9667	34.82	35.37	35.7267	35.39	35.99	35.3433	36.3933
-0.65	36.0867	34.92	35.02	35.03	35.97			35.5767	34.9867	35.3133	35.6267	34.9833			34.95	35.73	35.0733	34.78	36.1033	35.74	35.8667	34.8267	35.3667	35.69	35.3533	35.9467	35.35	36.4033
-0.633333	36.0467	34.9033	35.0033	35.0033	36.0467			35.6467	35.0033	35.3433	35.6133	35.02			35.08	35.7267	35.06	34.8333	36.09	35.7067	35.79	34.8333	35.36	35.64	35.32	35.8967	35.3533	36.3967
-0.616667	36.03	34.88	34.9967	35.0133	36.06			35.65	34.98	35.3567	35.61	35.0833			35.14	35.7333	35.0533	34.9033	36.09	35.6267	35.7733	34.8333	35.3467	35.7	35.26	35.8433	35.3467	36.39
-0.6	36.0167	34.92	34.9867	35.0267	36.0133			35.6167	34.9267	35.3567	35.62	35.1167			35.2133	35.7167	35.09	34.95	36.0933	35.6333	35.7567	34.84	35.3167	35.6433	35.2533	35.8	35.34	36.4133
-0.583333	36.0033	34.8833	34.9967	35.11	35.89			35.6033	34.8833	35.3367	35.6633	35.04			35.2633	35.76	35.1133	35.04	36.0867	35.64	35.76	34.87	35.2967	35.3933	35.19	35.76	35.31	36.4333
-0.566667	35.98	34.8533	35.0067	35.3967	35.8433			35.69	34.8533	35.28	35.6633	35.0067			35.3033	35.7667	35.0433	35.0733	36.0633	35.6533	35.74	34.89	35.2833	35.3767	35.1167	35.73	35.2767	36.4233
-0.55	35.9433	34.83	34.9733	35.5433	35.9367			35.7167	34.8033	35.2567	35.6667	35.0233			35.3267	35.7967	34.9067	35.0767	36.04	35.69	35.7333	34.8933	35.2767	35.49	35.03	35.68	35.25	36.4
-0.533333	35.8967	34.87	34.9667	35.6067	35.9667			35.64	34.8033	35.2467	35.6233	35.1467			35.34	35.84	34.8767	35.0733	36.0667	35.72	35.8	34.8867	35.27	35.48	34.9867	35.6567	35.2367	36.29
-0.516667	35.85	34.8733	34.9533	35.65	35.9567			35.58	34.7733	35.2533	35.5967	35.2033			35.3667	35.89	34.93	35.2167	36.0967	35.7433	35.8767	34.91	35.2767	35.4433	34.9667	35.6367	35.2167	36.15
-0.5	35.8133	34.89	34.9267	35.61	36.07			35.5667	34.67	35.2533	35.7	35.1867			35.4067	35.96	35.09	35.3733	36.1067	35.7467	35.92	34.9667	35.29	35.41	34.95	35.61	35.1833	36.02
-0.483333	35.78	34.9433	34.8967	35.56	36.09			35.69	34.6033	35.2367	35.7233	35.1667			35.37	36.0167	35.2133	35.4533	36.09	35.7633	35.9367	34.9933	35.28	35.3933	34.9867	35.6267	35.1433	35.9633
-0.466667	35.7533	34.96	34.8867	35.52	36.0433			35.6767	34.55	35.2267	35.7033	35.2033			35.2733	36.0367	35.2867	35.49	36.08	35.76	35.9467	34.98	35.28	35.3567	35.0567	35.6633	35.0767	35.96
-0.45	35.7933	34.9967	34.87	35.4467	35.8933			35.54	34.5633	35.2267	35.64	35.1933			35.22	36.1067	35.4233	35.5367	36.0767	35.75	35.97	34.9633	35.28	35.3167	35.0667	35.6733	35.1033	35.9633
-0.433333	35.7933	35.0433	34.8533	35.4267	35.9867			35.3833	34.6233	35.2233	35.6067	35.2533			35.22	36.1367	35.5767	35.5233	36.0833	35.7767	35.9733	34.9567	35.28	35.28	35.0833	35.6733	35.1467	35.96
-0.416667	35.78	35.0267	34.8467	35.3967	36.23			35.4567	34.6267	35.21	35.6433	35.32			35.29	36.13	35.5833	35.4933	36.12	35.8133	35.96	34.9633	35.2833	35.2433	35.12	35.6967	35.1667	36.0067
-0.4	35.78	34.99	34.92	35.3167	36.3467			35.5233	34.5967	35.2033	35.6633	35.3067			35.2767	36.1433	35.5833	35.38	36.1667	35.8367	35.9433	34.9533	35.26	35.24	35.13	35.7333	35.1767	36.1733
-0.383333	35.8133	35.2067	34.97	35.35	36.3733			35.68	34.5933	35.2133	35.6433	35.2933			35.2733	36.1833	35.5967	35.34	36.19	35.8633	35.92	34.95	35.2533	35.31	35.1167	35.7367	35.2233	36.2167
-0.366667	35.8633	35.35	34.97	35.3533	36.3533			35.7533	34.5967	35.2167	35.5667	35.26			35.39	36.23	35.5733	35.3967	36.1933	35.86	35.8967	34.9333	35.24	35.2767	35.0933	35.71	35.2633	36.24
-0.35	35.8967	35.4133	34.9467	35.31	36.3167			35.7367	34.5467	35.2333	35.4667	35.2367			35.4367	36.22	35.53	35.4633	36.1467	35.8567	35.8733	34.94	35.22	35.2267	35.1233	35.6767	35.2667	36.25
-0.333333	35.94	35.4467	34.9333	35.2767	36.3133			35.79	34.5333	35.2667	35.4033	35.1967			35.4467	36.1767	35.4867	35.5433	36.1567	35.8967	35.8633	34.9567	35.1867	35.2167	35.1533	35.63	35.2767	36.25
-0.316667	35.9733	35.4867	34.9233	35.2633	36.2867			35.7867	34.5367	35.3367	35.3867	35.16			35.44	36.1567	35.4833	35.6067	36.2333	35.92	35.8567	34.95	35.1133	35.21	35.1833	35.6	35.26	36.24
-0.3	35.96	35.5233	34.9067	35.2467	36.21			35.7367	34.51	35.3867	35.4033	35.1567			35.4367	36.1667	35.5567	35.64	36.23	35.9267	35.8033	34.95	35.0767	35.2167	35.2733	35.59	35.31	36.2267
-0.283333	35.9367	35.5567	34.9067	35.1733	36.0767			35.61	34.45	35.4267	35.3233	35.1667			35.4233	36.1333	35.61	35.6267	36.1933	35.9233	35.7433	34.9367	35.0233	35.2133	35.3767	35.5733	35.46	36.2233
-0.266667	35.9367	35.5833	34.9067	35.0533	36.04			35.4767	34.4367	35.45	35.24	35.1333			35.41	36.17	35.62	35.59	36.1467	35.9867	35.7133	34.8867	35.0067	35.18	35.42	35.5833	35.4667	36.1967
-0.25	35.9567	35.5833	34.8833	35.02	35.99			35.4533	34.4467	35.4767	35.24	35.0833			35.4	36.2233	35.6167	35.5733	36.1033	36.07	35.7067	34.8433	35.01	35.1267	35.4967	35.6833	35.4333	36.1567
-0.233333	35.9767	35.5133	34.8733	35.0567	35.9067			35.45	34.4533	35.4367	35.2267	35.0233			35.3867	36.3967	35.6433	35.5867	36.08	36.1267	35.7067	34.83	35.0133	35.1133	35.6133	35.7733	35.4067	36.17
-0.216667	36.0033	35.4767	34.8467	35.09	35.7667			35.51	34.4733	35.3133	35.2333	35.0067			35.4467	36.49	35.68	35.54	36.06	36.2467	35.73	34.86	35.0233	35.1067	35.6867	35.8367	35.4233	36.16
-0.2	36	35.4633	34.8533	35.1133	35.6567			35.5467	34.4733	35.26	35.22	34.9833			35.4833	36.51	35.6733	35.4433	36.0333	36.32	35.77	34.89	35.0233	35.1333	35.7333	35.8367	35.46	36.1367
-0.183333	36.0067	35.4667	34.8567	35.15	35.75			35.67	34.4567	35.2967	35.26	34.97			35.5	36.4967	35.6667	35.39	35.9933	36.32	35.83	34.89	35.01	35.1467	35.8233	35.8267	35.4367	36.1033
-0.166667	36.0333	35.4733	34.8567	35.1933	35.8067			35.73	34.4733	35.3533	35.27	34.9933			35.47	36.4533	35.7167	35.3833	35.95	36.37	35.8667	34.9	34.9933	35.1533	35.9567	35.8133	35.5	36.07
-0.15	36.0367	35.4733	34.8767	35.23	35.74			35.7567	34.51	35.4633	35.25	34.97			35.4367	36.4233	35.78	35.3933	35.9067	36.38	35.8767	35.02	35.0133	35.2	36.09	35.7867	35.52	36.06
-0.133333	36.0333	35.47	34.95	35.28	35.7			35.7733	34.5	35.4667	35.15	34.83			35.4033	36.48	35.76	35.3567	35.8967	36.3167	35.8733	35.0667	35.0167	35.2433	36.2033	35.7767	35.5167	36.0467
-0.116667	35.9867	35.45	35.0833	35.2967	35.88			35.7333	34.5333	35.52	35.1267	34.7133			35.3933	36.5133	35.7167	35.2733	35.8967	36.29	35.87	35.0767	35.0433	35.2533	36.3733	35.8133	35.4767	36.0233
-0.1	35.9433	35.41	35.1533	35.2667	35.95			35.68	34.62	35.5233	35.1967	34.69			35.4133	36.5533	35.6433	35.2	35.8567	36.2733	35.8733	35.06	35.0633	35.2567	36.5467	35.8433	35.46	36.0233
-0.0833333	35.91	35.37	35.1933	35.2767	36.0467			35.6267	34.6433	35.4733	35.2833	34.6567			35.44	36.5933	35.57	35.1667	35.8333	36.21	35.8567	35.0333	35.0733	35.2667	36.6367	35.8533	35.4067	36.0333
-0.0666667	35.8367	35.3267	35.2667	35.3	36.09			35.5867	34.6167	35.5067	35.2933	34.5767			35.4633	36.68	35.5133	35.18	35.8167	36.14	35.8267	35.0333	35.0867	35.2533	36.68	35.8467	35.3267	36.03
-0.05	35.79	35.29	35.4733	35.28	36.1067			35.53	34.5533	35.51	35.29	34.5633			35.4633	36.6933	35.4533	35.1633	35.8067	36.0833	35.8067	35.0367	35.1233	35.2433	36.6933	35.8433	35.2933	36.03
-0.0333333	35.74	35.2733	35.5833	35.25	36.1133			35.4567	34.5333	35.5667	35.27	34.6367			35.4433	36.78	35.42	35.0667	35.7767	36.03	35.79	35.02	35.1233	35.2133	36.6567	35.8067	35.3433	36.0033
-0.0166667	35.8233	35.2367	35.7567	35.2533	36.1367			35.4667	34.5533	35.7367	35.2533	34.69			35.4533	36.7867	35.4333	35.0067	35.7167	36	35.7833	34.99	35.1233	35.1467	36.6	35.7567	35.4533	35.9267
0	35.9633	35.4267	35.78	35.33	36.1767			35.5733	34.6067	35.9367	35.2533	34.7667			35.4533	36.7467	35.4567	34.9367	35.7033	35.9967	35.7633	35.0267	35.1233	35.1467	36.5767	35.7233	35.59	35.8867
0.0166667	35.8	35.55	35.76	35.3	36.1867			35.2533	34.6067	35.9567	35.29	34.7867			35.48	36.71	35.4633	34.94	35.7267	35.9933	35.7433	35.1333	35.1233	35.2133	36.5833	35.7167	35.6867	35.8867
0.0333333	35.6867	35.5933	35.7333	35.0967	36.18			35.3133	34.6433	35.9233	35.2967	34.77			35.4967	36.4733	35.5267	34.99	35.8033	35.7367	35.7533	35.26	35.09	35.41	36.5633	35.78	35.3733	35.98
0.05	35.7133	35.6667	35.7267	34.4233	36.1567			34.98	34.65	35.92	34.79	34.76			35.4633	35.7367	35.6467	35.0267	35.9367	35.4967	35.7433	35.3033	34.5133	35.5	36.6333	35.88	35.04	36.0033
0.0666667	35.8833	35.7	35.7967	34.3833	36.16			35.2433	34.59	35.93	34.6833	34.7333			35.3433	35.8133	35.65	35.21	36.1233	35.6733	35.6267	35.57	34.6467	35.3767	36.7033	36.0167	35.0367	35.6567
0.0833333	36.0533	35.7867	35.8033	34.42	36.0667			35.4733	34.4867	35.9033	34.7933	34.68			35.4967	35.9167	35.6433	35.3833	36.2833	36.0533	35.5467	35.6867	34.7933	35.4567	37.28	36.2333	35.36	35.7433
0.1	36.2367	35.58	35.8067	34.6233	36.0633			35.63	34.7467	35.61	35.02	34.7733			35.6867	36.1133	35.8867	35.6767	36.3233	36.3667	35.66	35.8933	34.93	35.6267	36.9167	36.38	35.79	35.9
0.116667	35.9167	35.53	35.85	34.87	36			35.6967	35.1367	35.93	35.33	34.89			35.9167	36.43	36.2533	36.0333	36.41	36.5167	35.84	36.06	35.0367	35.9033	37.1033	36.1767	36.0167	36.0733
0.133333	35.9333	35.7	36.19	35.0333	36.0733			35.75	35.1667	36.2133	35.5233	34.9			36.09	36.86	36.5633	36.3867	36.5433	36.5433	35.8433	36.2567	35.1	36.3933	37.3433	36.2033	36.2867	36.2567
0.15	36.0933	35.9	36.43	35.15	36.1567			35.78	35.0633	36.3167	35.74	34.7433			35.9833	37.0233	36.8867	36.6867	36.43	36.6767	35.8833	36.4433	35.22	36.6333	37.56	36.3833	36.4567	36.36
0.166667	36.2533	36.07	36.71	35.28	36.3433			35.7533	34.85	36.4633	35.8167	34.8033			36.0233	37.1267	37.1533	36.88	36.49	36.7633	35.9433	36.5967	35.47	36.56	37.75	36.6867	36.7167	36.3533
0.183333	36.3433	36.1267	36.96	35.3833	36.4533			35.6667	34.7933	36.6367	35.85	34.92			36.0467	37.13	37.2533	37.1433	36.62	36.74	35.9567	36.6333	35.6267	36.6367	37.8467	36.93	36.7367	36.4267
0.2	36.5933	36.11	37.0733	35.6033	36.55			35.84	34.8033	36.7433	35.8	35.0133			36.18	37.1633	37.2333	37.33	36.7633	36.8367	36.1167	36.6233	35.76	36.7867	37.8467	37.0633	36.7567	36.6
0.216667	36.77	36.1467	37.09	35.6567	36.7933			36.0233	34.7767	36.8333	35.86	35.1167			36.3833	37.2567	37.28	37.4067	36.8	37.0133	36.2267	36.61	35.8333	36.7233	37.82	37.0967	36.7033	36.7133
0.233333	36.8633	36.26	36.9633	35.8933	36.7967			36.1533	34.79	36.8933	35.9133	35.3333			36.3967	37.3933	37.2233	37.4867	36.8	37.09	36.37	36.6533	35.81	36.6433	37.7733	37.17	36.68	36.72
0.25	36.88	36.2867	36.8633	36.28	36.73			36.1367	34.95	36.96	35.8667	35.46			36.39	37.5067	37.0533	37.5367	36.7933	37.1467	36.4467	36.6167	35.7733	36.6967	37.7567	37.2433	36.7833	36.68
0.266667	37.0167	36.29	37.07	36.23	36.76			36.15	34.9933	36.9533	35.92	35.5667			36.69	37.5033	37.03	37.5667	36.7167	37.1267	36.54	36.7067	35.7633	37.12	37.8	37.26	36.8367	36.7067
0.283333	37.1967	36.3833	37.2633	36.05	36.8367			36.28	35.0667	36.8433	36.0233	35.9			36.8433	37.51	37.26	37.5467	36.6733	37.15	36.6	36.7467	35.9267	37.24	37.7967	37.19	36.7967	36.8067
0.3	37.21	36.6633	37.55	35.88	36.8967			36.35	35.11	36.84	35.9533	36.0633			36.89	37.5333	37.37	37.5267	36.63	37.1733	36.67	36.8067	35.9567	37.22	37.7333	37.18	36.76	36.9167
0.316667	37.2867	36.8	37.63	36.0467	36.83			36.39	35.0567	36.8933	35.88	36.1333			36.9033	37.5233	37.4467	37.52	36.61	37.1667	36.7967	36.86	35.9067	37.13	37.6667	37.16	36.85	36.99
0.333333	37.3633	36.8867	37.61	36.1567	36.7233			36.3867	35.08	36.98	35.9133	36.2033			36.8567	37.4833	37.51	37.5167	36.6433	37.1667	36.88	36.8733	35.88	37.09	37.6267	37.1867	36.9033	37.0267
0.35	37.3567	36.9367	37.5767	36.1133	36.7467			36.3667	35.2033	37.0033	36.0567	36.2767			36.7567	37.53	37.5	37.4867	36.6467	37.17	36.7967	36.8733	35.99	37.0267	37.49	37.2233	36.85	37.0467
0.366667	37.3667	36.9033	37.54	36.07	36.72			36.4067	35.3867	37.0167	36.1233	36.3067			36.7233	37.4733	37.5267	37.46	36.66	37.13	36.6967	36.8433	36.0667	36.9567	37.3567	37.1567	36.8167	37.1133
0.383333	37.3767	36.8733	37.4133	36.1133	36.7333			36.41	35.4767	37.0467	36.1667	36.31			36.7433	37.3467	37.4633	37.4033	36.6167	37.1	36.75	36.7333	36.0767	36.8267	37.35	37.13	36.7233	37.1133
0.4	37.3567	36.85	37.2633	36.0567	36.9067			36.3867	35.4667	37.0767	36.2833	36.31			36.76	37.2467	37.37	37.3733	36.4433	37.13	36.8933	36.7533	36.1367	36.7533	37.3067	37.1333	36.7133	37.1233
0.416667	37.3933	36.84	37.2567	36.0267	37.08			36.4167	35.3667	37.0933	36.3067	36.3067			36.81	37.15	37.3033	37.3767	36.3667	37.1467	37.0133	36.76	36.2533	36.8067	37.2533	37.1333	36.6233	37.1833
0.433333	37.44	36.81	37.29	36.08	37.1767			36.3967	35.3167	37.1067	36.2667	36.2967			36.8233	36.94	37.2833	37.2867	36.4633	37.1733	36.9467	36.77	36.3233	36.8967	37.2567	37.1433	36.4267	37.17
0.45	37.44	36.7	37.4033	36.1267	37.1533			36.3033	35.3533	37.0467	36.21	36.3			36.8467	36.85	37.2633	37.1867	36.6367	37.26	36.9167	36.7533	36.4233	36.87	37.18	37.11	36.32	37.2167
0.466667	37.3933	36.6	37.46	36.0067	37.1833			36.1233	35.37	36.97	36.1533	36.24			36.8533	36.8633	37.2167	37.09	36.72	37.27	36.92	36.68	36.4567	36.82	37.1	37.0333	36.2467	37.2367
0.483333	37.3933	36.5633	37.4767	36.0367	37.1933			36.04	35.2767	36.9267	36.2067	36.4067			36.8233	36.8367	37.18	36.95	36.71	37.2533	37.0033	36.6033	36.4867	36.7767	37.0867	36.9533	36.2867	37.0833
0.5	37.4167	36.53	37.4967	36.0667	37.18			35.86	35.2433	36.8033	36.3833	36.43			36.8	36.7467	37.0633	36.8833	36.66	37.2567	37.0167	36.62	36.4433	36.72	37.08	36.8467	36.3867	37
0.516667	37.3	36.5167	37.5367	36.0233	37.1467			35.7433	35.2933	36.7267	36.3833	36.3767			36.7633	36.62	36.8133	36.84	36.6333	37.2133	36.9767	36.67	36.3433	36.7	37.0833	36.8467	36.34	36.9733
0.533333	37.12	36.55	37.54	36.11	37.19			35.98	35.3967	36.7967	36.24	36.3733			36.7167	36.5467	36.6133	36.76	36.6067	37.11	36.9933	36.7133	36.38	36.6333	37.1067	36.85	36.3733	37.01
0.55	36.9967	36.6433	37.5067	36.0433	37.16			36.08	35.5167	36.7967	36.12	36.3667			36.6567	36.5067	36.53	36.7367	36.55	36.9967	36.9233	36.71	36.4333	36.53	37.1	36.8033	36.3867	37.0433
0.566667	37.0033	36.6433	37.4367	35.87	37.1333			36.1533	35.7033	36.77	36.01	36.3267			36.5367	36.5133	36.4833	36.7233	36.52	37.0267	36.98	36.6567	36.4333	36.39	37.0767	36.7733	36.42	37.0833
0.583333	36.9833	36.6267	37.3867	35.91	37.12			36.16	35.8067	36.6933	35.9733	36.3033			36.4	36.5067	36.4433	36.6867	36.52	37.0567	37.0667	36.62	36.4433	36.3667	37.0233	36.82	36.4533	37.0633
0.6	36.99	36.6067	37.3067	36.1433	37.1333			36.16	35.8833	36.7	36.04	36.2667			36.3833	36.4633	36.3833	36.6467	36.6	36.9833	37.06	36.6667	36.4767	36.4133	36.9367	36.8767	36.4633	36.9933
0.616667	36.9033	36.5867	37.24	36.5133	37.24			36.18	35.95	36.72	35.98	36.2367			36.4233	36.3933	36.3467	36.65	36.6133	36.8567	37.04	36.6733	36.4333	36.41	36.92	36.9833	36.3967	36.9433
0.633333	36.6533	36.6	37.1833	36.6233	37.22			36.1667	35.9133	36.6567	35.9367	36.2033			36.3967	36.3733	36.3333	36.6167	36.6033	36.8733	37.0033	36.67	36.2767	36.3633	36.9367	37.1967	36.35	36.9167
0.65	36.5633	36.5367	37.1267	36.6733	37.1967			36.11	35.8767	36.6667	35.9067	36.2667			36.4033	36.37	36.38	36.53	36.56	36.92	36.9667	36.6267	36.27	36.32	36.93	37.2233	36.3967	36.8967
0.666667	36.6767	36.4767	37.1233	36.6433	37.1833			36.0667	35.8433	36.7333	35.9267	36.3067			36.4233	36.33	36.37	36.5367	36.4767	36.9233	36.94	36.59	36.4	36.27	36.87	37.1	36.4133	36.8633
0.683333	36.73	36.4733	37.1167	36.6033	37.22			36.0033	35.8467	36.7767	35.99	36.3			36.4533	36.3133	36.34	36.5	36.4433	36.9433	36.95	36.6133	36.45	36.1367	36.84	36.9167	36.4567	36.8033
0.7	36.7867	36.4633	37.0933	36.41	37.23			35.9	35.8433	36.7667	36.11	36.3467			36.4733	36.46	36.3133	36.46	36.4433	36.9967	36.9433	36.61	36.4167	36.0033	36.81	36.91	36.4733	36.72
0.716667	36.9033	36.4767	37.0667	36.15	37.1767			35.8067	35.83	36.7533	36.1667	36.4533			36.4433	36.48	36.2767	36.41	36.4667	37.06	36.8433	36.5567	36.3833	36.0333	36.7467	36.9	36.54	36.7167
0.733333	36.9533	36.4433	37.0233	36.1333	37.1733			35.7433	35.86	36.7533	35.95	36.5933			36.4033	36.4133	36.1567	36.3467	36.4567	37.07	36.7233	36.4533	36.3767	36.1667	36.6767	36.86	36.6	36.7367
0.75	36.9633	36.3967	36.99	36.1967	37.11			35.72	35.86	36.7333	35.7633	36.5833			36.3333	36.3733	36.0167	36.29	36.4433	37.0533	36.6533	36.3	36.3367	36.21	36.5833	36.8	36.6567	36.7
0.766667	36.9333	36.3367	36.95	36.2467	37.1067			35.74	35.7233	36.6833	35.7033	36.4067			36.27	36.3667	36.0633	36.2333	36.4667	37.0133	36.5833	36.1733	36.1967	36.2267	36.5233	36.73	36.6967	36.6667
0.783333	36.8967	36.3767	36.93	36.26	37.06			35.8633	35.59	36.58	35.76	36.21			36.2267	36.4033	36.17	36.1433	36.44	36.9767	36.5767	36.1133	36.0133	36.2033	36.51	36.74	36.73	36.63
0.8	36.86	36.39	36.8967	36.2567	37.0433			35.86	35.56	36.4133	35.8067	36.1667			36.1967	36.4367	36.1967	36.07	36.3733	36.9533	36.69	36.08	35.98	36.14	36.53	36.7567	36.8167	36.55
0.816667	36.8	36.4	36.8633	36.2033	37.1033			35.8267	35.6033	36.4267	35.86	36.1233			36.17	36.4233	36.18	36.0267	36.3267	36.93	36.6333	36.0767	36.0133	36.0533	36.5967	36.7367	36.8233	36.5267
0.833333	36.7633	36.4133	36.84	36.1733	37.1567			35.9067	35.5933	36.4033	35.8933	36.0233			36.1233	36.36	36.1667	35.94	36.3367	36.8733	36.58	36.0567	36.05	35.9067	36.6033	36.6733	36.7933	36.5567
0.85	36.7367	36.5067	36.8467	36.2033	37.16			35.97	35.63	36.3467	35.9033	36.0867			36.0867	36.3333	36.1833	35.8933	36.2833	36.8033	36.5667	36.05	36.0467	35.8	36.56	36.6	36.7533	36.5767
0.866667	36.7067	36.62	36.84	36.1833	37.1833			36.01	35.7	36.3667	35.8967	36.1533			36.06	36.3067	36.1833	35.87	36.2533	36.7367	36.55	36.0733	36.0067	35.8833	36.54	36.5367	36.6933	36.5667
0.883333	36.6667	36.6	36.81	36.2567	37.25			36.04	35.7367	36.3333	35.8867	36.1367			36.0267	36.2867	36.16	35.8133	36.2367	36.7033	36.52	36.15	35.97	35.98	36.55	36.4633	36.6367	36.5933
0.9	36.6333	36.5633	36.7733	36.3467	37.2767			36.0333	35.7167	36.28	35.8933	36.08			35.9933	36.2933	36.12	35.7133	36.2833	36.68	36.51	36.16	35.9567	36.01	36.5433	36.4067	36.6067	36.6133
0.916667	36.6133	36.5467	36.8	36.33	37.2933			36	35.6567	36.2733	35.8933	35.9633			35.9533	36.28	36.0633	35.67	36.3267	36.6967	36.5233	36.11	35.9267	36.0067	36.5233	36.36	36.6167	36.5867
0.933333	36.65	36.5267	36.9367	36.2933	37.2467			35.96	35.6167	36.2967	35.8867	35.8733			35.9167	36.25	36.0233	35.7367	36.31	36.7133	36.5467	36.15	35.8933	36.03	36.4867	36.32	36.6133	36.5733
0.95	36.6467	36.5	36.9533	36.23	37.2333			35.9433	35.56	36.2967	35.85	35.8633			35.9	36.2233	35.99	35.75	36.3	36.6967	36.62	36.17	35.85	36.0167	36.4433	36.3067	36.5967	36.5967
0.966667	36.6133	36.4967	36.8633	36.19	37.2267			35.9167	35.5267	36.2533	35.8133	35.9467			35.8833	36.1867	35.95	35.72	36.2967	36.6633	36.6333	36.1967	35.9567	36.0033	36.4	36.3067	36.5533	36.59
0.983333	36.6167	36.5733	36.78	36.1333	37.16			35.89	35.5033	36.1967	35.7767	35.96			35.8667	36.1467	35.88	35.6833	36.3133	36.6067	36.6033	36.1733	35.9533	35.99	36.3567	36.3067	36.4333	36.5867
1	36.6	36.6033	36.7833	36.1033	37.0933			35.8967	35.48	36.16	35.76	35.95			35.84	36.0767	35.8433	35.63	36.2733	36.53	36.5667	36.0967	35.91	35.9833	36.3	36.3067	36.3133	36.56
1.01667	36.5267	36.57	36.87	36.09	37.0367			35.9	35.4433	36.15	35.75	36.0833			35.8267	36.0067	35.8167	35.5733	36.22	36.4433	36.5	36.0567	35.8667	35.9933	36.2967	36.3167	36.3133	36.5367
1.03333	36.4833	36.5067	36.9367	36.07	37			35.9033	35.4133	36.1367	35.7167	36.0433			35.84	36.0133	35.8	35.5433	36.2367	36.3733	36.4767	36.0233	35.8267	36	36.2767	36.3433	36.31	36.53
1.05	36.4767	36.4733	37.0467	36.0467	36.96			35.9033	35.3833	36.1	35.7033	35.8767			35.8867	36.0533	35.7967	35.52	36.2633	36.3067	36.4933	36.0133	35.7967	35.9667	36.2667	36.3633	36.28	36.5233
1.06667	36.5167	36.5	37.1233	36.0333	36.9567			35.97	35.3633	36.0367	35.6833	35.8833			35.8967	36.1	35.7833	35.5333	36.2367	36.2567	36.49	36.06	35.7767	35.9633	36.29	36.3633	36.21	36.5233
1.08333	36.5267	36.4733	37.1333	36.0233	37.0367			35.9767	35.3933	35.9633	35.6567	35.92			35.8867	36.19	35.7567	35.6	36.1067	36.22	36.4767	36.0933	35.8133	35.96	36.3167	36.3533	36.1633	36.52
1.1	36.53	36.4633	37.1233	36	37.0433			35.98	35.4667	35.9367	35.7167	35.9233			35.8867	36.23	35.74	35.61	36.0767	36.17	36.4633	36.1333	35.9233	35.9533	36.3933	36.3133	36.1233	36.5133
1.11667	36.5333	36.4733	37.1267	35.9767	37.0333			35.9833	35.47	35.9467	35.72	35.91			35.8833	36.2433	35.7233	35.5733	36.09	36.1233	36.45	36.0967	35.9167	35.9367	36.5367	36.28	36.11	36.52
1.13333	36.5233	36.4833	37.19	35.9667	36.94			35.9967	35.45	35.9333	35.6833	35.8567			35.8833	36.23	35.7067	35.5133	36.08	36.0767	36.42	36.01	35.8867	35.9133	36.5833	36.2567	36.09	36.5233
1.15	36.5167	36.48	37.3967	35.9567	36.6967			36.0167	35.4267	36.0033	35.62	35.8533			35.8767	36.1767	35.69	35.4667	36.21	36.0367	36.4067	36.0133	35.8467	35.94	36.58	36.21	36.0633	36.5233
1.16667	36.5167	36.4733	37.46	35.9267	36.7			36.0067	35.4167	36.0433	35.5733	35.83			35.8833	36.1233	35.6833	35.4367	36.2967	35.9933	36.39	35.9933	35.8	35.87	36.5567	36.1767	36.0533	36.52
1.18333	36.5067	36.4233	37.4867	35.9	36.9367			35.9933	35.4133	36.0267	35.5367	35.77			35.8967	36.0433	35.67	35.4267	36.3	35.9567	36.3733	35.93	35.8033	35.7233	36.4867	36.1333	36.1333	36.5167
1.2	36.4833	36.3933	37.4733	35.8667	36.9567			35.9767	35.4467	36.02	35.4767	35.6567			35.9	36.01	35.6367	35.49	36.2233	35.9233	36.3867	35.8967	35.8	35.5567	36.4833	36.08	36.17	36.5133
1.21667	36.4367	36.37	37.4367	35.86	36.8467			35.9633	35.4533	36.01	35.4033	35.6867			35.88	35.9733	35.6433	35.53	36.1867	35.9	36.4367	35.87	35.7967	35.61	36.51	36.0267	36.16	36.5
1.23333	36.46	36.34	37.3767	35.8633	36.6867			35.9433	35.45	35.9633	35.34	35.7067			35.8433	35.9333	35.6833	35.55	36.1833	35.88	36.4733	35.8433	35.8133	35.63	36.5067	35.9733	36.1467	36.5033
1.25	36.5767	36.31	37.2367	35.8867	36.7967			35.9167	35.4467	35.8867	35.3	35.5833			35.7933	35.9033	35.6867	35.58	36.19	35.8567	36.4867	35.8133	35.8067	35.65	36.4767	35.9333	36.1267	36.5067
1.26667	36.5833	36.2833	37.1667	35.9033	36.83			35.8933	35.4467	35.8433	35.28	35.4433			35.7467	35.89	35.6767	35.59	36.2367	35.84	36.47	35.8167	35.7733	35.6967	36.4433	35.89	36.1167	36.49
1.28333	36.62	36.2567	37.11	35.9267	36.8267			35.91	35.4333	35.8167	35.2933	35.43			35.7333	35.89	35.64	35.5267	36.2233	35.8267	36.4367	35.8133	35.75	35.7333	36.4133	35.9367	36.1167	36.4633
1.3	36.6433	36.2167	37.05	35.94	36.8233			35.9333	35.3933	35.7867	35.3733	35.4433			35.76	35.9167	35.59	35.41	36.2133	35.8267	36.3967	35.8	35.7333	35.86	36.3367	36.0233	36.1167	36.4233
1.31667	36.6467	36.1733	37.04	35.9333	36.7833			35.94	35.37	35.7633	35.46	35.5467			35.77	36.0033	35.6233	35.4133	36.22	35.8233	36.35	35.77	35.7167	35.8967	36.2967	36.0033	36.1333	36.3667
1.33333	36.6467	36.14	37.06	35.9033	36.7833			35.9467	35.3567	35.75	35.5	35.5767			35.72	36.0533	35.6533	35.41	36.2533	35.8233	36.41	35.7433	35.6967	35.8767	36.26	35.9933	36.14	36.3367
1.35	36.64	36.1167	37.0467	35.9033	36.81			35.9433	35.34	35.77	35.52	35.56			35.6533	36.08	35.6567	35.4367	36.25	35.8067	36.4167	35.7267	35.7567	35.85	36.2233	36.0067	36.1133	36.29
1.36667	36.6433	36.1167	36.99	35.91	36.75			35.93	35.31	35.7933	35.52	35.5367			35.7767	36.1067	35.65	35.4	36.2967	35.82	36.42	35.7033	35.7533	35.8367	36.2267	36.0267	36.12	36.2367
1.38333	36.6433	36.13	36.9267	35.8967	36.7567			35.93	35.2433	35.7933	35.5067	35.5433			35.95	36.1367	35.6167	35.2967	36.2967	35.91	36.4133	35.6833	35.74	35.8	36.1867	36.0267	36.1033	36.2167
1.4	36.6367	36.15	36.94	35.9067	36.8133			35.95	34.9833	35.7767	35.4967	35.51			35.99	36.13	35.6433	35.2433	36.25	35.96	36.42	35.75	35.6933	35.76	36.11	36.0267	36.0667	36.24
1.41667	36.64	36.1633	37	35.93	36.84			35.9767	34.87	35.78	35.5167	35.49			36.02	36.09	35.6367	35.27	36.2	35.9633	36.4167	35.8633	35.68	35.7633	36.08	36.0333	36.0567	36.2133
1.43333	36.6733	36.1667	37.01	35.93	36.8433			36.03	34.85	35.7933	35.6033	35.45			36.0167	36.0133	35.63	35.29	36.16	35.99	36.43	35.8867	35.69	35.7367	36.0533	36.0333	36.0533	36.19
1.45	36.72	36.15	37.0167	35.9067	36.84			36.03	34.8333	35.7867	35.6267	35.43			36	35.9433	35.6667	35.3067	36.12	36.0333	36.4433	35.8567	35.69	35.7033	36.03	36.0233	36.0633	36.1733
1.46667	36.75	36.1467	36.9933	35.88	36.8333			35.99	34.8267	35.81	35.64	35.4067			36.02	35.8867	35.6567	35.31	36.0967	36.05	36.4533	35.8233	35.6967	35.6833	35.98	36.02	36.06	36.14
1.48333	36.7533	36.15	36.93	35.9033	36.8267			35.8133	34.81	35.81	35.6233	35.37			36.0167	35.84	35.6233	35.28	36.0967	36.0733	36.4567	35.7933	35.7033	35.6667	35.93	36.0133	36.06	36.1067
1.5	36.7267	36.16	36.87	35.9333	36.8167			35.61	34.7933	35.8467	35.6033	35.3133			35.9133	35.7933	35.58	35.2533	36.0833	36.0733	36.45	35.76	35.7033	35.65	35.9167	35.9967	36.0533	36.09
1.51667	36.7467	36.17	36.8133	35.97	36.78			35.5267	34.8167	35.87	35.5967	35.2733			35.8467	35.7467	35.5633	35.2467	36.0567	36.0367	36.44	35.7333	35.71	35.63	35.9467	35.9767	36.0267	36.08
1.53333	36.79	36.1667	36.7567	35.9733	36.73			35.5833	34.83	35.8767	35.5833	35.2333			35.8233	35.7067	35.5533	35.2933	36.0433	36.02	36.4433	35.6833	35.7167	35.5733	35.9533	35.9567	36.0033	36.0967
1.55	36.7433	36.1667	36.7033	35.9233	36.71			35.7167	34.8267	35.8567	35.5267	35.1833			35.8467	35.6967	35.56	35.3467	36.04	36.0767	36.4433	35.6833	35.73	35.5467	35.98	35.94	35.9967	36.0933
1.56667	36.6933	36.1633	36.64	35.82	36.6867			36.05	34.8367	35.8533	35.48	35.1767			35.96	35.6967	35.53	35.3967	36.0467	36.1833	36.43	35.6867	35.7367	35.5533	35.9633	35.9033	35.9867	36.0967
1.58333	36.67	36.1433	36.58	35.8867	36.68			36.12	34.8367	35.91	35.4733	35.1633			36.0033	35.7133	35.5133	35.4533	36.05	36.2267	36.42	35.6867	35.73	35.5767	35.9767	35.87	35.9533	36.12
1.6	36.66	36.1133	36.52	35.9133	36.6733			36.1333	34.8233	35.92	35.47	35.1133			36.0033	35.7333	35.4933	35.5233	36.07	36.2433	36.4267	35.6933	35.73	35.5667	35.9767	35.8333	35.8967	36.1133
1.61667	36.6633	36.0533	36.4933	35.8967	36.6567			36.12	34.8	35.9067	35.41	35.06			35.97	35.77	35.45	35.5367	36.0733	36.2333	36.44	35.6967	35.7533	35.4967	35.96	35.82	35.85	36.1167
1.63333	36.67	36.03	36.4733	35.83	36.6533			36.25	34.79	35.8767	35.3433	35.0167			35.9733	35.8133	35.4067	35.54	36.0667	36.2267	36.4467	35.6833	35.7667	35.5033	35.9633	35.81	35.8133	36.0933
1.65	36.6667	36.04	36.4733	35.73	36.7			36.35	34.7533	35.82	35.29	34.98			36.0733	35.8367	35.3767	35.5867	36.0567	36.21	36.43	35.72	35.7533	35.5967	35.9833	35.8167	35.79	36.0833
1.66667	36.6433	36.02	36.46	35.61	36.7133			36.3333	34.6533	35.8133	35.2367	34.9733			36.1267	35.8567	35.3633	35.72	36.06	36.1767	36.41	35.7433	35.7333	35.61	36.0767	35.82	35.8067	36.0867
1.68333	36.6567	35.9867	36.4267	35.6167	36.6867			36.2733	34.6267	35.8667	35.2133	35.0033			36.1033	35.88	35.3833	35.89	36.0567	36.1333	36.39	35.7067	35.7133	35.44	36.18	35.81	35.8433	36.06
1.7	36.7433	36.0067	36.39	35.7867	36.5967			36.2133	34.88	35.84	35.2267	35.01			36.0233	35.89	35.3733	36	36.05	36.0933	36.3833	35.7133	35.7067	35.31	36.2433	35.79	35.8333	36.0167
1.71667	36.7033	36.0267	36.36	35.8667	36.5933			36.12	34.8633	35.82	35.2333	34.9867			35.9633	35.88	35.39	36.1567	36.0533	36.06	36.3567	35.6867	35.7	35.3333	36.32	35.7333	35.92	35.9967
1.73333	36.6633	36.0567	36.3333	35.9433	36.58			36.01	34.84	35.7833	35.2367	34.9233			35.97	35.8533	35.4233	36.3	36.05	36.0333	36.3267	35.6433	35.6633	35.3433	36.42	35.68	36	36.0433
1.75	36.6233	36.13	36.3033	36.0433	36.55			36.02	34.8633	35.74	35.23	34.8867			35.95	35.8167	35.42	36.36	36.05	36.0067	36.3133	35.6267	35.6367	35.3467	36.4433	35.6767	36.0267	36.1833
1.76667	36.6567	36.1633	36.28	36.0567	36.5133			36.0467	35.14	35.7767	35.2	34.85			35.9433	35.7967	35.3867	36.3733	36.0533	35.9867	36.3133	35.61	35.6333	35.36	36.47	35.7167	36.0733	36.2267
1.78333	36.7067	36.15	36.26	36.0333	36.5167			35.8567	35.2933	35.8267	35.0867	34.7833			35.94	35.7833	35.3367	36.36	36.06	35.97	36.3367	35.6133	35.6067	35.36	36.52	35.7067	36.1133	36.2133
1.8	36.7433	36.15	36.2533	35.98	36.5333			35.7433	35.3633	35.9167	34.92	34.79			35.9433	35.7667	35.28	36.42	36.0733	35.9433	36.3467	35.6167	35.5367	35.39	36.5333	35.6833	36.12	36.21
1.81667	36.77	36.1467	36.2567	35.8567	36.55			35.7967	35.3833	35.9167	34.8467	34.7967			35.92	35.7367	35.2433	36.4567	36.0433	35.9367	36.3	35.6	35.5233	35.3833	36.5267	35.6633	36.1333	36.1967
1.83333	36.7533	36.16	36.2533	35.8533	36.5667			35.8933	35.3633	35.93	34.9167	34.8133			35.8633	35.7133	35.21	36.4267	36.0033	35.9667	36.2867	35.57	35.55	35.3633	36.5167	35.6467	36.1533	36.18
1.85	36.7367	36.1567	36.25	35.9067	36.5733			35.93	35.28	35.8767	34.9	34.8167			35.81	35.7	35.1767	36.3967	35.9767	35.9633	36.3067	35.4933	35.55	35.3433	36.5133	35.6167	36.1467	36.1633
1.86667	36.75	36.16	36.2633	35.9933	36.5933			35.7967	35.1833	35.87	34.9067	34.8067			35.74	35.7	35.1833	36.4467	35.9633	35.9733	36.3167	35.4367	35.52	35.34	36.5333	35.5033	36.1133	36.1467
1.88333	36.63	36.16	36.2667	36.04	36.62			35.83	35.1167	35.8867	35	34.7833			35.6933	35.6967	35.29	36.5167	35.9467	36.01	36.31	35.3333	35.5233	35.35	36.5633	35.54	36.08	36.15
1.9	36.5633	36.1733	36.2467	36.0567	36.6533			35.8867	35.0567	35.9733	35.1133	34.7733			35.6833	35.71	35.3	36.6233	35.9333	36.03	36.2967	35.2667	35.5033	35.3167	36.6033	35.6	36.0667	36.21
1.91667	36.53	36.22	36.24	36.0333	36.67			35.88	35.0167	36	35.1033	34.7867			35.67	35.7233	35.3033	36.7333	35.9233	36.0233	36.28	35.3033	35.44	35.27	36.61	35.5433	36.05	36.2433
1.93333	36.52	36.2967	36.2167	35.91	36.68			35.91	35.0467	35.9833	35.14	34.7967			35.6533	35.7033	35.31	36.7933	35.92	36.0067	36.27	35.3767	35.3967	35.2367	36.6	35.5367	36.0867	36.2333
1.95	36.4867	36.3	36.1733	35.95	36.6833			35.9733	35.06	35.96	35.1867	34.7933			35.64	35.6933	35.3	36.8	35.9267	36.0467	36.2567	35.4	35.3633	35.1933	36.5833	35.5533	36.1167	36.2
1.96667	36.4667	36.25	36.1167	36.0033	36.6733			35.94	34.9633	35.9367	35.1867	34.8133			35.6333	35.7033	35.33	36.82	35.9067	36.06	36.2367	35.41	35.3533	35.1633	36.5667	35.5533	36.1067	36.1933
1.98333	36.5067	36.2167	36.0833	36.0967	36.6467			35.8133	34.8867	35.9133	35.17	34.83			35.63	35.6967	35.36	36.8533	35.8767	36.0667	36.2267	35.3833	35.3933	35.1333	36.5667	35.5333	36.0567	36.2
2	36.4867	36.2033	36.06	36.1233	36.5633			35.7067	34.8167	35.8533	35.2533	34.8267			35.6133	35.69	35.3767	36.9	35.8567	36.0633	36.22	35.36	35.45	35.1067	36.5567	35.6133	35.9967	36.2033
2.01667	36.46	36.2067	36.0533	36.11	36.54			35.67	34.7567	35.8	35.3767	34.79			35.6067	35.69	35.4167	36.9233	35.8233	36.05	36.2133	35.34	35.4667	35.1267	36.5867	35.81	35.9467	36.2
2.03333	36.3967	36.2067	36.0433	36.13	36.5167			35.7667	34.72	35.75	35.5167	34.77			35.61	35.6933	35.4533	36.9733	35.7933	36.0433	36.1733	35.3367	35.4567	35.14	36.67	35.89	35.9067	36.1733
2.05	36.3667	36.2067	36.0133	36.2033	36.4567			35.77	34.72	35.6967	35.5433	34.7867			35.6133	35.6833	35.4133	36.96	35.7433	36.0467	36.11	35.3367	35.4833	35.1233	36.7233	35.8867	35.8933	36.13
2.06667	36.37	36.2067	36	36.2133	36.4267			35.6667	34.7167	35.6667	35.5333	34.8333			35.6267	35.6533	35.38	36.99	35.7233	36.05	36.0833	35.3733	35.5367	35.0933	36.72	35.8333	35.89	36.08
2.08333	36.37	36.2067	36.01	36.21	36.42			35.57	34.7067	35.6233	35.51	34.8833			35.64	35.6167	35.42	36.99	35.71	36.0533	36.0567	35.4633	35.6133	35.0733	36.6633	35.82	35.8533	36.0433
2.1	36.4267	36.2067	36	36.1967	36.4033			35.5533	34.7133	35.5833	35.4967	34.9133			35.64	35.59	35.4167	36.97	35.7133	36.0833	36.0233	35.54	35.6633	35.0533	36.6033	35.86	35.7833	36
2.11667	36.4233	36.21	36.04	36.1833	36.3833			35.54	34.81	35.5533	35.45	34.91			35.6533	35.5833	35.3767	36.93	35.7067	36.1	35.9967	35.5733	35.6767	35.0767	36.5733	35.9	35.76	35.99
2.13333	36.27	36.21	36.04	36.2233	36.37			35.4133	35.0133	35.51	35.3733	34.8667			35.65	35.5867	35.37	36.9033	35.7033	36.13	35.9833	35.63	35.6967	35.0867	36.59	35.9133	35.7667	35.9967
2.15	36.2367	36.2233	36.0267	36.2233	36.3567			35.5267	35.2033	35.4633	35.3033	34.8733			35.6433	35.59	35.3667	36.97	35.6967	36.16	35.9833	35.6333	35.6933	35.0533	36.56	35.9167	35.7867	35.9933
2.16667	36.2167	36.2367	36.1067	36.17	36.37			35.6467	35.3567	35.3933	35.2633	34.8933			35.6733	35.5867	35.3933	36.9833	35.7	36.1667	36.0033	35.65	35.6167	35.02	36.5233	35.91	35.8267	35.9133
2.18333	36.2367	36.25	36.2867	36.1267	36.4133			35.7133	35.5967	35.3633	35.2533	34.9133			35.7033	35.5833	35.3867	36.91	35.7433	36.18	36.0367	35.6833	35.6033	35.02	36.51	35.8967	35.8767	35.94
2.2	36.2533	36.2467	36.36	36.0933	36.4433			35.7333	35.73	35.3567	35.2533	34.9633			35.76	35.5733	35.3733	36.82	35.8167	36.18	36.0567	35.6733	35.6233	35.0067	36.4633	35.88	35.92	36.0233
2.21667	36.24	36.23	36.3967	36.06	36.4533			35.7	35.8067	35.35	35.2533	34.93			35.7867	35.57	35.3733	36.7067	35.8033	36.18	36.0767	35.6367	35.66	34.98	36.4167	35.8667	35.9467	36.0733
2.23333	36.1833	36.21	36.4267	36.03	36.4233			35.6867	35.8167	35.37	35.2567	34.9067			35.8367	35.57	35.4633	36.6967	35.85	36.1767	36.1	35.59	35.7367	34.95	36.3767	35.8533	35.9667	36.1167
2.25	36.1733	36.1933	36.4667	36.01	36.3133			35.6967	35.7333	35.4167	35.2333	34.9033			36.06	35.58	35.4867	36.6967	35.89	36.17	36.1	35.5267	35.8333	34.9567	36.3	35.8167	35.9833	36.1167
2.26667	36.1933	36.0567	36.4667	35.9967	36.29			35.6867	35.5567	35.5033	35.26	34.92			36.12	35.5567	35.49	36.6533	36.0133	36.1567	36.1133	35.4667	35.9233	34.9833	36.2433	35.77	35.9867	36.1167
2.28333	36.1067	35.8633	36.4067	35.9733	36.2467			35.67	35.42	35.5167	35.3133	34.9433			36.17	35.5867	35.4833	36.59	36.08	36.0967	36.14	35.4233	36.0067	34.9833	36.25	35.7333	35.9867	36.11
2.3	36.0567	35.7933	36.38	35.9167	36.28			35.6367	35.4	35.5167	35.37	34.94			36.21	35.67	35.4733	36.5667	36.0867	36.0533	36.1433	35.4033	36.0467	34.9667	36.2533	35.7	35.9867	36.0833
2.31667	36.0667	35.7767	36.29	35.8967	36.3933			35.6067	35.3633	35.5	35.47	34.93			36.19	35.7667	35.46	36.5	36.0833	36.03	36.1233	35.4233	36.0567	34.9533	36.2233	35.6733	35.9867	36.0767
2.33333	36.08	35.76	36.2233	35.95	36.5633			35.5933	35.3267	35.4867	35.51	34.9067			36.1167	35.85	35.44	36.4033	36.0167	35.98	36.0667	35.43	36.0333	34.9967	36.2	35.65	35.9967	36.0967
2.35	36.1533	35.72	36.37	35.9633	36.5733			35.58	35.6	35.47	35.4967	34.9			35.9633	35.95	35.4267	36.37	35.9533	35.9267	35.99	35.4367	35.9833	35.0967	36.1767	35.6267	36.0133	36.1967
2.36667	36.22	35.8	36.5067	35.9967	36.5533			35.5733	35.7733	35.46	35.4967	34.9267			35.9467	36.0467	35.4167	36.37	35.9867	35.88	35.9167	35.4567	35.9633	35.13	36.13	35.6033	36.03	36.2333
2.38333	36.3367	35.8867	36.5967	36.0033	36.6633			35.5633	35.7733	35.48	35.4833	34.95			36.0733	36.12	35.4	36.35	36.0367	35.8467	36.05	35.4533	35.97	35.2267	36.0667	35.6067	36.0133	36.2367
2.4	36.39	35.87	36.7267	35.9967	36.8033			35.5567	35.76	35.4767	35.45	34.9633			36.1433	36.22	35.4267	36.2933	36.08	35.8367	36.24	35.46	35.9367	35.3167	35.9967	35.62	35.9833	36.25
2.41667	36.4267	35.8467	36.7233	35.98	36.8967			35.56	35.7633	35.4633	35.4233	34.96			36.19	36.2767	35.4667	36.2167	36.11	35.84	36.2767	35.45	35.87	35.33	35.88	35.6367	35.9433	36.2467
2.43333	36.4333	35.8033	36.7567	35.9467	37.0067			35.5633	35.76	35.45	35.3233	35.02			36.14	36.3367	35.4867	36.12	36.1267	35.84	36.2733	35.4833	35.81	35.1833	35.81	35.6667	35.91	36.2433
2.45	36.4967	35.6533	36.7633	35.9267	37.02			35.6033	35.7767	35.4167	35.3533	35.0733			36.1	36.4367	35.4967	36.06	36.1467	35.8567	36.2533	35.4833	35.7833	35.14	35.7667	35.6967	35.9	36.2233
2.46667	36.6767	35.53	36.6767	35.91	36.9833			35.63	35.8067	35.37	35.4833	35.0967			36.0767	36.4633	35.5633	35.9933	36.18	35.8533	36.2333	35.4567	35.7733	35.25	35.7333	35.69	35.8633	36.1967
2.48333	36.7167	35.48	36.6867	35.89	36.96			35.63	35.7967	35.38	35.4733	35.1			36.0267	36.47	35.5967	35.93	36.19	35.8533	36.2167	35.41	35.7533	35.56	35.73	35.6667	35.85	36.18
2.5	36.6867	35.45	36.7	35.89	36.9533			35.6867	35.7767	35.3933	35.4333	35.08			35.9833	36.3433	35.6033	35.86	36.2067	35.8433	36.21	35.5267	35.7367	35.7467	35.7267	35.6467	35.88	36.2133
2.51667	36.6533	35.44	36.81	35.9067	36.9533			35.7233	35.76	35.4633	35.4667	35.0833			35.9367	36.28	35.5933	35.7867	36.2233	35.8233	36.2733	35.5567	35.7367	35.8267	35.6667	35.6233	35.91	36.2167
2.53333	36.58	35.6067	36.8633	35.88	36.9433			35.7	35.7333	35.5467	35.46	35.1533			35.8533	36.2967	35.5633	35.72	36.21	35.7933	36.3067	35.54	35.74	35.79	35.6233	35.6433	35.91	36.1967
2.55	36.5467	35.7033	36.8667	35.8567	36.91			35.6867	35.7167	35.5733	35.3933	35.2			35.7667	36.3833	35.4733	35.62	36.1733	35.76	36.3267	35.5333	35.71	35.7933	35.6767	35.69	35.9033	36.1867
2.56667	36.53	35.73	36.86	35.8667	36.8433			35.6467	35.6867	35.5967	35.35	35.2767			35.6867	36.5	35.4833	35.5933	36.2167	35.72	36.3667	35.5267	35.7467	35.8833	35.7033	35.7267	35.8867	36.1733
2.58333	36.5033	35.7767	36.8867	35.9033	36.7833			35.6167	35.65	35.6033	35.3767	35.3167			35.6067	36.53	35.53	35.5833	36.2167	35.6933	36.39	35.5333	35.8067	36.0433	35.7167	35.7233	35.86	36.17
2.6	36.4833	35.79	36.88	35.9167	36.7533			35.5733	35.6067	35.5767	35.3633	35.3267			35.5533	36.5233	35.5233	35.5767	36.1867	35.6567	36.4167	35.5533	35.8267	36.0633	35.6933	35.7167	35.82	36.1533
2.61667	36.4667	35.8067	36.81	35.9167	36.73			35.5633	35.5767	35.5	35.3367	35.32			35.51	36.4867	35.5167	35.5533	36.13	35.6333	36.4433	35.5333	35.8233	35.9767	35.6767	35.7167	35.7567	36.13
2.63333	36.4467	35.8767	36.7467	35.9067	36.7133			35.5733	35.56	35.4033	35.3767	35.3067			35.46	36.4233	35.5067	35.54	36.0533	35.62	36.4533	35.49	35.8067	35.8667	35.6567	35.7367	35.7233	36.11
2.65	36.43	35.9333	36.7467	35.8967	36.6933			35.5867	35.53	35.32	35.3467	35.3033			35.4167	36.3633	35.42	35.5167	36.0133	35.62	36.45	35.46	35.8	35.8067	35.6233	35.7133	35.73	36.0667
2.66667	36.3967	35.9433	36.7367	35.89	36.68			35.62	35.51	35.3267	35.33	35.2767			35.3767	36.3	35.3767	35.4833	35.9867	35.62	36.4333	35.4567	35.7967	35.7633	35.64	35.7333	35.74	36.0333
2.68333	36.3733	35.94	36.6833	35.88	36.65			35.6433	35.4967	35.3667	35.34	35.2533			35.3433	36.2533	35.3567	35.5367	35.9667	35.61	36.4133	35.4333	35.7867	35.8167	35.6567	35.76	35.7133	36.0433
2.7	36.3733	35.9133	36.5833	35.9167	36.62			35.6567	35.5067	35.3467	35.4433	35.2433			35.3133	36.1867	35.3667	35.6167	35.95	35.61	36.3967	35.4133	35.7833	35.8267	35.6633	35.8033	35.73	36.0633
2.71667	36.3733	36.0067	36.5033	35.94	36.6			35.72	35.5367	35.3667	35.4367	35.2467			35.2767	36.1167	35.4833	35.6867	35.97	35.6267	36.3867	35.4167	35.7567	35.7833	35.6667	35.8167	35.7633	36.06
2.73333	36.3933	36.0533	36.4133	35.95	36.6033			35.82	35.52	35.3767	35.3967	35.2267			35.24	36.0667	35.6	35.7467	36.0133	35.63	36.37	35.4133	35.7133	35.6967	35.66	35.7967	35.7533	36.0567
2.75	36.3967	36.1433	36.3567	35.9233	36.6067			35.9033	35.48	35.3733	35.3833	35.2067			35.21	36.0267	35.6033	35.7433	36.04	35.6467	36.3633	35.4033	35.7333	35.56	35.6733	35.8167	35.8167	36.0933
2.76667	36.3933	36.22	36.3233	35.9067	36.5833			35.9067	35.4533	35.4033	35.4867	35.1867			35.17	35.99	35.5733	35.7167	36	35.6667	36.3433	35.4267	35.7267	35.5567	35.7133	35.8533	35.8733	36.1267
2.78333	36.39	36.26	36.2667	35.9033	36.55			35.89	35.44	35.3933	35.4933	35.1633			35.15	35.9733	35.52	35.67	35.9867	35.6933	36.31	35.4433	35.76	35.5767	35.8	35.9033	35.8967	36.1233
2.8	36.3867	36.2467	36.18	35.8767	36.53			35.87	35.42	35.3833	35.4733	35.1633			35.1533	35.9733	35.4667	35.6267	35.99	35.7067	36.2633	35.4833	35.81	35.5867	35.8567	35.9767	35.8833	36.11
2.81667	36.3833	36.1967	36.13	35.8367	36.4467			35.8433	35.4167	35.3767	35.5033	35.1533			35.1467	35.97	35.4333	35.6167	35.96	35.7367	36.26	35.5133	35.8133	35.5833	35.8867	36.02	35.88	36.0767
2.83333	36.3733	36.17	36.0767	35.7867	36.4167			35.8533	35.42	35.3633	35.4867	35.1133			35.14	35.96	35.3933	35.6033	35.92	35.7567	36.2567	35.56	35.81	35.6233	35.8833	36.01	35.8833	36.0567
2.85	36.3333	36.1133	36.0567	35.77	36.44			35.91	35.4167	35.3633	35.5067	35.08			35.1333	35.95	35.4033	35.58	35.8733	35.7567	36.2367	35.6	35.82	35.6367	35.8867	35.9333	35.88	36.0667
2.86667	36.3767	36.0633	36.0467	35.78	36.4467			36.0033	35.4233	35.3667	35.5233	35.0767			35.1367	35.9367	35.43	35.5167	35.86	35.7533	36.2267	35.6433	35.7233	35.6933	35.8833	35.8567	35.88	36.07
2.88333	36.4267	36.0133	36.04	35.8467	36.4867			35.97	35.4267	35.37	35.53	35.02			35.1367	35.93	35.4267	35.4533	35.8733	35.8067	36.23	35.7	35.6267	35.7833	35.8567	35.8467	35.8833	36.0667
2.9	36.41	35.9867	36.02	35.8667	36.5			35.8767	35.44	35.3567	35.5733	34.9067			35.1367	35.92	35.4233	35.4733	35.8733	35.8633	36.2233	35.7267	35.6033	35.77	35.8167	35.8167	35.87	36.0733
2.91667	36.37	35.97	36	35.8667	36.51			35.8533	35.4433	35.3367	35.5933	34.86			35.17	35.9133	35.4167	35.47	35.8567	35.8933	36.2033	35.7533	35.57	35.7167	35.75	35.7533	35.8467	36.0767
2.93333	36.3233	35.9533	35.9867	35.8333	36.5033			35.8667	35.44	35.3233	35.6	34.8233			35.2833	35.8967	35.41	35.4233	35.85	35.9	36.1867	35.79	35.5567	35.6433	35.7267	35.6733	35.86	36.0767
2.95	36.2267	35.96	35.98	35.8267	36.46			35.8767	35.4533	35.3067	35.63	34.8733			35.2867	35.87	35.3867	35.3967	35.8633	35.9	36.17	35.8367	35.55	35.6167	35.6833	35.66	35.9467	36.09
2.96667	36.08	35.9933	35.96	35.8133	36.4167			35.88	35.43	35.2967	35.6833	34.93			35.28	35.85	35.3667	35.3867	35.8667	35.8733	36.15	35.7833	35.59	35.6567	35.68	35.6033	35.9567	36.1
2.98333	35.9867	35.9767	35.9767	35.75	36.3967			35.8767	35.3767	35.3033	35.7167	34.98			35.25	35.83	35.34	35.3867	35.88	35.85	36.1367	35.7833	35.7133	35.6667	35.7067	35.5367	35.9467	36.1033
3	35.9467	35.9433	36	35.6833	36.3933			35.8567	35.33	35.2967	35.72	34.9933			35.2367	35.81	35.3167	35.3967	35.8767	35.8333	36.1233	35.8267	35.7233	35.6533	35.6933	35.58	35.96	36.0767
3.01667	35.9267	35.9167	35.9933	35.67	36.38			35.8467	35.29	35.3	35.71	35.0167			35.4133	35.8	35.3	35.3867	35.8867	35.8233	36.09	35.83	35.71	35.6533	35.6467	35.7067	35.9733	36.0967
3.03333	35.9167	35.8867	35.9867	35.6867	36.36			35.8467	35.2667	35.3033	35.6967	35.04			35.4633	35.79	35.3033	35.4033	35.8967	35.8133	36.0267	35.9133	35.69	35.6567	35.6167	35.7767	35.9833	36.1167
3.05	35.94	35.8467	35.9633	35.7033	36.3467			35.87	35.2733	35.3633	35.66	35.0333			35.5267	35.78	35.3033	35.4	35.9067	35.8033	36.0133	35.9233	35.75	35.6567	35.6167	35.8	36.0467	36.11
3.06667	35.9867	35.8133	35.9333	35.71	36.3333			35.95	35.29	35.39	35.6267	35.0133			35.55	35.7633	35.29	35.37	35.9033	35.79	35.9967	35.9067	35.7567	35.6633	35.6233	35.79	36.0633	36.0867
3.08333	36	35.7833	35.9067	35.7133	36.33			35.9733	35.2833	35.3333	35.6567	34.99			35.5667	35.7467	35.28	35.32	35.9033	35.7933	35.9933	35.8733	35.8033	35.66	35.6	35.84	36.0733	36.0433
3.1	36.0067	35.77	35.88	35.7033	36.3067			35.9567	35.3033	35.3167	35.6267	34.9633			35.5533	35.7267	35.2733	35.28	35.9033	35.8067	35.99	35.8267	35.84	35.65	35.5333	35.9033	36.09	35.9767
3.11667	36.0167	35.8	35.8967	35.7033	36.2567			35.8233	35.3867	35.3233	35.5767	34.95			35.57	35.6933	35.2633	35.2967	35.9033	35.8133	35.99	35.79	35.86	35.65	35.4833	35.93	36.0967	35.9033
3.13333	36.01	35.7833	35.9033	35.7733	36.17			35.7667	35.3967	35.29	35.5567	34.95			35.5833	35.6567	35.26	35.31	35.9	35.8067	35.96	35.7433	35.8367	35.6333	35.4667	35.9333	36.1167	35.83
3.15	36.01	35.74	35.9033	35.79	36.0933			35.72	35.3967	35.3067	35.5567	34.94			35.5667	35.6267	35.27	35.2867	35.8933	35.7833	35.9267	35.7033	35.8133	35.59	35.5067	35.9333	36.1233	35.8133
3.16667	36.02	35.7133	35.89	35.7767	36.09			35.6767	35.4267	35.3433	35.58	34.9233			35.5733	35.61	35.2567	35.2867	35.8833	35.78	36.0033	35.6467	35.8733	35.55	35.54	35.9133	36.09	35.8333
3.18333	36.0467	35.6933	35.8833	35.74	36.1167			35.6233	35.4467	35.4333	35.56	34.9233			35.55	35.6	35.2333	35.3067	35.88	35.83	36.1567	35.5833	35.8633	35.5467	35.5633	35.8867	36.05	35.8533
3.2	36.16	35.6733	35.8633	35.7067	36.1367			35.6033	35.4633	35.4667	35.5067	34.9467			35.4433	35.5833	35.2167	35.2733	35.87	35.88	36.1967	35.5233	35.8467	35.5133	35.6	35.8433	36.0033	35.8833
3.21667	36.22	35.68	35.8467	35.68	36.1667			35.62	35.48	35.3033	35.5367	34.96			35.3767	35.57	35.1933	35.2	35.8567	35.88	36.23	35.48	35.84	35.4867	35.6033	35.8033	35.9567	35.89
3.23333	36.22	35.6967	35.83	35.6733	36.1767			35.6733	35.5533	35.2367	35.6067	34.98			35.3367	35.5567	35.16	35.1733	35.8333	35.8367	36.27	35.4267	35.82	35.44	35.61	35.7867	35.9067	35.8833
3.25	36.19	35.6967	35.82	35.6867	36.17			35.7833	35.5633	35.5067	35.5367	35.0267			35.3133	35.54	35.13	35.1233	35.8133	35.8067	36.2567	35.4567	35.75	35.2967	35.61	35.7933	35.86	35.86
3.26667	36.3133	35.7267	35.8333	35.7033	36.1467			35.8533	35.5933	35.7533	35.4167	35.04			35.2933	35.52	35.1	35.1267	35.7933	35.77	36.2133	35.4867	35.68	35.2367	35.66	35.7833	35.8233	35.8367
3.28333	36.37	35.7633	35.84	35.7033	36.1367			36.05	35.62	35.8033	35.3867	35.03			35.2733	35.5467	35.0333	35.1333	35.78	35.7633	36.2333	35.4767	35.69	35.2067	35.7367	35.75	35.79	35.8
3.3	36.38	35.7167	35.84	35.67	36.1167			36.08	35.65	35.7933	35.39	34.98			35.25	35.55	34.9567	35.1167	35.7533	35.7667	36.2333	35.48	35.6967	35.2267	35.8033	35.7367	35.7633	35.7733
3.31667	36.41	35.67	35.8367	35.62	36.07			35.9767	35.6667	35.7833	35.4133	34.9533			35.22	35.5433	34.9633	35.0933	35.6867	35.8	36.2833	35.45	35.7167	35.34	35.7933	35.77	35.8033	35.7867
3.33333	36.4767	35.63	35.8367	35.61	36.02			35.96	35.7	35.7767	35.4633	34.9333			35.1567	35.5367	35.0367	35.0267	35.6033	35.83	36.3333	35.4167	35.65	35.5867	35.7867	35.7967	35.8233	35.7833
3.35	36.59	35.61	35.83	35.61	35.9767			35.9567	35.6667	35.7567	35.43	34.9267			35.1267	35.5233	35.2567	34.9733	35.5533	35.8467	36.3867	35.3867	35.5233	35.6567	35.7467	35.8267	35.86	35.75
3.36667	36.67	35.6067	35.82	35.5833	35.9733			35.96	35.6067	35.7367	35.3833	34.92			35.1567	35.51	35.4133	34.99	35.5133	35.8467	36.4467	35.34	35.48	35.7167	35.7167	35.8333	35.8733	35.75
3.38333	36.7367	35.64	35.8233	35.5533	35.9767			36.0133	35.6733	35.7267	35.37	34.9167			35.19	35.49	35.4467	35.0767	35.49	35.8667	36.5467	35.31	35.4733	35.71	35.6933	35.7967	35.8833	35.77
3.4	36.7233	35.6433	35.83	35.5967	35.9733			36.1367	35.6533	35.7567	35.3467	34.92			35.2367	35.4733	35.4267	35.1067	35.4667	35.9167	36.55	35.3	35.4967	35.6967	35.6367	35.8033	35.8867	35.74
3.41667	36.6967	35.6133	35.8367	35.61	35.9633			36.1767	35.6367	35.7433	35.3	34.9267			35.3	35.4533	35.3733	35.1233	35.4367	35.9833	36.54	35.2733	35.53	35.6733	35.5833	35.85	35.88	35.7367
3.43333	36.7133	35.61	35.83	35.7033	35.9533			36.1467	35.68	35.71	35.26	34.93			35.3767	35.4333	35.31	35.03	35.4133	36.03	36.4833	35.27	35.4833	35.6433	35.5467	35.89	35.8633	35.7467
3.45	36.7433	35.7433	35.86	35.72	35.9467			36.0167	35.69	35.6333	35.2033	34.9167			35.5467	35.3767	35.26	35.03	35.4167	36.0267	36.4633	35.29	35.42	35.63	35.4967	35.9	35.85	35.7567
3.46667	36.7667	35.9033	35.8633	35.6567	35.9433			35.8867	35.6833	35.5567	35.1167	34.8867			35.59	35.33	35.21	35.1567	35.3967	35.9967	36.49	35.3067	35.5733	35.63	35.45	35.9167	35.84	35.75
3.48333	36.79	35.9533	35.8467	35.4567	35.95			35.85	35.6867	35.5	34.9833	34.8867			35.6233	35.3567	35.1233	35.2567	35.38	35.9733	36.4733	35.3067	35.66	35.6333	35.3867	36	35.8167	35.7467
3.5	36.7833	35.9267	35.8267	35.26	35.9833			35.8467	35.7433	35.4667	34.78	34.89			35.6233	35.42	35.0167	35.2967	35.3633	35.9633	36.45	35.2967	35.7233	35.6033	35.3767	36.0633	35.79	35.7267
3.51667	36.7733	35.8967	35.8233	35.2	35.9933			35.9867	35.8233	35.4467	34.8033	34.8567			35.62	35.43	35.05	35.3833	35.3433	35.97	36.43	35.3033	35.7567	35.5667	35.39	36.07	35.77	35.7267
3.53333	36.7867	35.9	35.8233	35.3733	36.08			36.18	35.85	35.42	35	34.84			35.5833	35.48	35.1033	35.47	35.3267	35.9667	36.4233	35.3067	35.7667	35.54	35.3867	36.0867	35.78	35.7233
3.55	36.78	35.83	35.81	35.4767	36.1433			36.2567	36.07	35.3967	35.0133	34.8333			35.55	35.58	35.08	35.5433	35.3167	35.9367	36.4233	35.3	35.7533	35.4933	35.3767	36.1	35.7867	35.72
3.56667	36.78	35.8767	35.7933	35.52	36.14			36.26	36.1467	35.4	35.02	34.8233			35.4967	35.6633	35.16	35.5767	35.31	35.8233	36.4233	35.28	35.7267	35.4467	35.38	36.1367	35.7833	35.7267
3.58333	36.76	36.0967	35.8033	35.54	36.0967			36.26	36.1733	35.41	35.1167	34.7867			35.46	35.6767	35.2	35.5667	35.3133	35.67	36.4233	35.2567	35.7367	35.46	35.3567	36.1633	35.7867	35.7367
3.6	36.66	36.2567	35.7967	35.5467	36.16			36.25	36.1667	35.4033	35.17	34.7567			35.4	35.6667	35.2033	35.5367	35.3033	35.7767	36.42	35.22	35.7367	35.44	35.3467	36.15	35.8033	35.7433
3.61667	36.6433	36.3667	35.7733	35.52	36.18			36.1033	36.1467	35.4133	35.2067	34.7533			35.3133	35.6667	35.2067	35.5133	35.2833	35.8633	36.41	35.1867	35.69	35.4	35.34	36.1233	35.8233	35.7367
3.63333	36.73	36.38	35.76	35.4267	36.0733			35.9767	36.1267	35.4	35.2633	34.7633			35.29	35.6767	35.2067	35.4733	35.27	35.92	36.3733	35.1633	35.63	35.3567	35.33	36.0867	35.9067	35.7333
3.65	36.7833	36.3533	35.7367	35.38	36.0367			35.92	36.0667	35.38	35.2533	34.78			35.3033	35.69	35.1467	35.4667	35.3167	35.9667	36.25	35.1533	35.6233	35.3167	35.3	36.0733	35.93	35.74
3.66667	36.7833	36.35	35.7333	35.3833	36.03			35.8633	36.0033	35.38	35.2433	34.8			35.28	35.69	34.9433	35.46	35.4	35.9667	36.12	35.1467	35.64	35.2767	35.28	36.0467	35.9633	35.7467
3.68333	36.8467	36.3533	35.8433	35.4067	36.03			35.7467	35.9567	35.3633	35.38	34.87			35.2833	35.67	34.85	35.47	35.4267	35.9733	36.14	35.14	35.6567	35.23	35.29	36.0367	36.01	35.78
3.7	36.8433	36.37	35.9467	35.4633	36.0533			35.6033	35.8933	35.3367	35.5033	34.89			35.2733	35.66	34.91	35.4167	35.4133	35.98	36.29	35.1633	35.67	35.1967	35.31	36.0033	36.0767	35.8067
3.71667	36.7633	36.39	36.0333	35.4233	36.0733			35.51	35.8367	35.32	35.4867	34.84			35.2433	35.6567	35.06	35.3433	35.4067	36.0133	36.33	35.1767	35.68	35.1833	35.3767	35.9567	36.11	35.8333
3.73333	36.6467	36.38	36.0867	35.37	36.09			35.4933	35.8	35.32	35.4767	34.82			35.2167	35.6533	35.1333	35.2533	35.3967	36.03	36.3467	35.17	35.6833	35.1667	35.45	35.9367	36.1267	35.8467
3.75	36.6267	36.3367	36.12	35.34	36.14			35.5267	35.7533	35.31	35.5167	34.8233			35.18	35.6167	35.16	35.1967	35.4133	36.1233	36.3467	35.1733	35.7033	35.1233	35.5033	35.93	36.1633	35.8567
3.76667	36.62	36.3067	36.12	35.3233	36.1767			35.57	35.7067	35.28	35.6133	34.9267			35.14	35.5767	35.1533	35.1567	35.4367	36.2667	36.34	35.1733	35.7133	35.0933	35.4967	35.9333	36.2267	35.8733
3.78333	36.5967	36.2967	36.1	35.29	36.2			35.5067	35.5767	35.25	35.5933	35.0433			35.0933	35.5767	35.0667	35.0933	35.4033	36.3467	36.3367	35.18	35.7433	35.0633	35.4433	35.93	36.24	35.88
3.8	36.58	36.25	36.0667	35.3633	36.1933			35.4133	35.32	35.2333	35.52	35.13			35.15	35.5667	35	35.1	35.4	36.43	36.3367	35.1833	35.8033	35.1567	35.4367	35.96	36.2633	35.8967
3.81667	36.5433	36.1967	36.0933	35.4267	36.1933			35.25	35.25	35.2267	35.44	35.2067			35.1567	35.5467	35.0033	35.1433	35.38	36.5067	36.33	35.1633	35.8033	35.1867	35.4467	35.9633	36.3267	35.9033
3.83333	36.4967	36.21	36.1667	35.4333	36.2533			35.56	35.24	35.2167	35.4433	35.3867			35.1167	35.5333	35.05	35.16	35.2667	36.5367	36.32	35.0267	35.81	35.1767	35.4233	35.9433	36.3067	35.9133
3.85	36.46	36.1967	36.2067	35.3033	36.3567			35.7733	35.23	35.1967	35.4767	35.4567			35.0867	35.52	35.15	35.2	35.1633	36.5833	36.3	34.97	35.8267	35.14	35.3667	35.9167	36.27	35.92
3.86667	36.4333	36.1167	36.2867	35.4167	36.57			35.8533	35.1933	35.1867	35.5967	35.48			35.0633	35.4967	35.2	35.2067	35.1433	36.6567	36.26	34.9533	35.8	35.1	35.3067	35.8733	36.1933	35.93
3.88333	36.3933	36.1433	36.3567	35.6933	36.5733			35.8767	35.15	35.1733	35.6033	35.53			35.0233	35.4833	35.24	35.19	35.18	36.71	36.2167	35.0833	35.72	35.07	35.2933	35.8367	36.1833	35.93
3.9	36.31	36.1733	36.38	35.6833	36.51			35.94	35.1167	35.1533	35.6667	35.62			35.0133	35.4733	35.3867	35.1467	35.1533	36.79	36.2067	35.0767	35.6667	35.0567	35.2833	35.8133	36.2833	35.9267
3.91667	36.2233	36.1733	36.36	35.6333	36.46			35.9833	35.0933	35.1367	35.6633	35.7233			35.05	35.4633	35.4633	35.0933	35.2133	36.72	36.1933	35.0367	35.68	35.0533	35.3167	35.78	36.3133	35.9167
3.93333	36.2133	36.3167	36.3367	35.64	36.5167			36.0033	35.0567	35.1233	35.6433	35.7567			35.0333	35.4667	35.4133	35.02	35.2733	36.66	36.17	35.0533	35.67	35.0733	35.3133	35.7333	36.3033	35.9133
3.95	36.3133	36.41	36.2967	35.6433	36.72			35.9633	35.0367	35.1	35.6767	35.8033			34.9833	35.4667	35.35	34.92	35.2333	36.6467	36.1367	35.0767	35.65	35.11	35.27	35.6867	36.2767	35.9033
3.96667	36.3867	36.4367	36.2067	35.6767	36.79			35.8933	35.02	35.1233	35.7067	35.8367			34.9167	35.4567	35.4067	34.88	35.26	36.59	36.1067	35.11	35.6467	35.1067	35.2133	35.6867	36.2733	35.9067
3.98333	36.4033	36.46	36.0433	35.7067	36.77			35.7733	34.98	35.2033	35.7167	35.8533			35.0033	35.44	35.4333	34.8633	35.39	36.6567	36.0833	35.1833	35.64	35.0967	35.1633	35.6833	36.24	35.9033
4	36.3967	36.48	35.83	35.7033	36.71			35.81	34.97	35.23	35.7033	35.8533			35.0233	35.4367	35.3167	34.8733	35.4733	36.7	36.1033	35.1267	35.6367	35.08	35.1933	35.67	36.1633	35.8867
4.01667	36.47	36.4933	35.9767	35.5567	36.6567			36.05	34.9767	35.24	35.65	35.86			35.04	35.42	35.3233	34.8967	35.5933	36.6967	36.1267	35.1133	35.64	35.0667	35.2667	35.6567	36.1067	35.8633
4.03333	36.46	36.4867	36.2067	35.62	36.67			36.1633	34.9933	35.21	35.6267	35.83			35.1367	35.3833	35.36	34.9067	35.6833	36.68	36.1233	35.2733	35.6533	35.0567	35.37	35.6167	36.0767	35.86
4.05	36.38	36.4333	36.34	35.7033	36.68			36.11	35.05	35.2033	35.6067	35.82			35.32	35.4333	35.3433	34.9133	35.78	36.6333	36.1033	35.3333	35.65	35.12	35.4467	35.5467	36.0767	35.87
4.06667	36.3133	36.3733	36.36	35.7667	36.7067			35.9667	35.1467	35.2767	35.61	35.86			35.4167	35.4767	35.4533	34.9433	35.8767	36.63	36.1067	35.35	35.63	35.1233	35.4833	35.5133	36.0667	35.87
4.08333	36.41	36.3233	36.3333	35.7467	36.7467			35.8667	35.1967	35.34	35.5467	35.86			35.49	35.5367	35.51	34.9567	35.8967	36.6967	36.1067	35.36	35.6033	35.1267	35.5133	35.49	36.0633	35.8733
4.1	36.41	36.2533	36.35	35.6767	36.74			35.85	35.2267	35.3867	35.4167	35.9133			35.5033	35.6233	35.4833	35	35.9	36.8333	36.1033	35.38	35.5433	35.15	35.57	35.46	36.0667	35.8433
4.11667	36.3067	36.22	36.4133	35.72	36.7033			35.92	35.23	35.4167	35.3233	36.0467			35.4967	35.6633	35.4867	35.08	35.97	36.8433	36.09	35.3867	35.4833	35.1833	35.6233	35.4867	36.0633	35.8167
4.13333	36.2333	36.31	36.4533	35.7667	36.67			36.07	35.27	35.47	35.3	36.15			35.4967	35.6767	35.5067	35.0833	36.0367	36.8567	36.0867	35.4733	35.4767	35.2333	35.6367	35.5167	36.0733	35.83
4.15	36.1733	36.3367	36.4367	35.7333	36.6567			36.08	35.2633	35.5233	35.2567	36.1833			35.49	35.6767	35.5733	35.07	36.1133	36.8567	36.0967	35.5567	35.4733	35.24	35.6667	35.5333	36.1067	35.88
4.16667	36.1767	36.3333	36.3567	35.6833	36.65			35.9833	35.2733	35.5133	35.26	36.1633			35.4667	35.6833	35.57	35.1	36.1067	36.83	36.0967	35.7467	35.4567	35.23	35.74	35.53	36.15	35.94
4.18333	36.3433	36.3933	36.2133	35.66	36.61			35.8167	35.2767	35.4733	35.3267	36.07			35.4267	35.7167	35.5333	35.15	36.06	36.7933	36.0867	35.8433	35.43	35.2867	35.8067	35.5267	36.1733	35.9433
4.2	36.3533	36.49	36.08	35.6267	36.5533			35.7933	35.2633	35.4467	35.3533	36.01			35.32	35.7533	35.49	35.1333	36	36.76	36.0567	35.86	35.4267	35.2833	35.8333	35.5033	36.19	35.92
4.21667	36.22	36.51	35.9467	35.61	36.53			35.96	35.2633	35.39	35.4433	35.95			35.2567	35.78	35.3833	35.0533	35.9133	36.7433	36.0633	35.85	35.42	35.22	35.81	35.48	36.2033	35.9367
4.23333	36.1267	36.48	35.97	35.6333	36.5333			36.0667	35.23	35.3867	35.48	35.9167			35.1833	35.77	35.45	35.0267	35.89	36.7033	36.1	35.83	35.4133	35.21	35.8033	35.4867	36.2467	35.91
4.25	36.1367	36.4267	36	35.6267	36.53			36.09	35.1933	35.42	35.33	35.8967			35.1467	35.7567	35.4833	35.0333	35.9067	36.68	36.12	35.79	35.41	35.3367	35.8067	35.49	36.2433	35.9233
4.26667	36.3133	36.4167	36.0067	35.59	36.5033			36.1133	35.1833	35.5433	35.11	35.9467			35.1567	35.7433	35.42	35.0033	35.93	36.6667	36.1233	35.7767	35.45	35.4467	35.8433	35.4933	36.1967	35.9433
4.28333	36.2867	36.3433	35.99	35.5133	36.48			36.1033	35.1567	35.5967	35.0733	36.02			35.1467	35.72	35.4333	34.91	35.9867	36.6133	36.13	35.76	35.44	35.5233	35.92	35.55	36.1767	36.0033
4.3	36.1267	36.2	35.9533	35.4367	36.4733			36.1033	35.1367	35.6067	35.14	36.1467			35.12	35.7033	35.4467	34.91	36.1033	36.5567	36.14	35.68	35.3933	35.56	35.9733	35.5967	36.17	35.97
4.31667	36.0933	36.1033	35.8967	35.42	36.47			36.13	35.13	35.6167	35.1533	36.2833			35.08	35.71	35.46	34.9233	36.14	36.5433	36.1033	35.5133	35.3667	35.64	36.0033	35.6033	36.17	36.0033
4.33333	36.0767	36.03	35.8433	35.3833	36.47			36.1467	35.1533	35.61	35.1533	36.36			35.06	35.73	35.45	34.9533	36.1433	36.53	36.0567	35.55	35.45	35.6533	36.05	35.6	36.1633	36.06
4.35	36.0867	36.1133	35.7867	35.3167	36.4667			36.1333	35.17	35.61	35.1667	36.4067			35.03	35.7133	35.46	35.0067	36.1033	36.48	36.0533	35.8067	35.5233	35.63	36.0633	35.57	36.1967	36.12
4.36667	36.1033	36.2833	35.74	35.4933	36.4433			36.12	35.2167	35.6	35.1833	36.4533			34.9267	35.6833	35.55	35.0667	36.06	36.2933	36.08	35.89	35.5733	35.6167	36.07	35.51	36.2	36.2233
4.38333	36.1233	36.2633	35.7033	35.6167	36.45			36.12	35.2367	35.5667	35.18	36.51			34.8767	35.6567	35.5733	35.1233	36.0867	36.2867	36.1367	35.83	35.6233	35.6333	36.17	35.4867	36.1867	36.2767
4.4	36.1733	36.2667	35.6567	35.63	36.4567			36.1	35.2467	35.53	35.1967	36.56			34.8533	35.6533	35.58	35.1833	36.0933	36.3333	36.1533	35.63	35.6333	35.6767	36.33	35.5	36.14	36.2433
4.41667	36.2867	36.3933	35.6033	35.6733	36.45			36.08	35.2533	35.5033	35.2067	36.5667			34.8167	35.6567	35.5433	35.24	36.0733	36.3367	36.1367	35.4933	35.6333	35.73	36.44	35.47	36.1	36.2067
4.43333	36.32	36.3933	35.52	35.71	36.4567			36.0633	35.2567	35.4633	35.17	36.5667			34.77	35.6267	35.49	35.2733	36.0367	36.3467	36.1467	35.47	35.62	35.8433	36.57	35.4533	36.11	36.0733
4.45	36.2767	36.3667	35.4833	35.8333	36.46			36.0333	35.2533	35.42	35.1733	36.5567			34.7033	35.64	35.4733	35.3167	35.9233	36.31	36.1167	35.4733	35.6067	35.8933	36.6633	35.4767	36.1433	36.09
4.46667	36.2533	36.36	35.4667	35.9967	36.4567			35.9833	35.2533	35.3767	35.3067	36.53			34.6633	35.6867	35.4433	35.3467	35.84	36.2433	36.0967	35.44	35.5933	35.8133	36.7	35.44	36.13	36.1667
4.48333	36.2567	36.3367	35.4633	36.09	36.44			35.9167	35.2867	35.3	35.3233	36.5133			34.6333	35.6933	35.4033	35.3633	35.8067	36.1867	36.0633	35.41	35.5733	35.77	36.7533	35.4133	36.14	36.1233
4.5	36.2333	36.2967	35.4567	36.13	36.4067			35.8867	35.3133	35.19	35.3267	36.4833			34.6	35.71	35.39	35.35	35.8267	36.1633	36.06	35.4267	35.5633	35.7533	36.7867	35.4633	36.17	36.2133
4.51667	36.21	36.2567	35.4667	36.1367	36.4			35.87	35.3433	35.1433	35.3167	36.44			34.5633	35.77	35.37	35.3333	35.8333	36.12	36.07	35.4533	35.5367	35.7433	36.7533	35.4833	36.2233	36.26
4.53333	36.1833	36.22	35.47	36.1733	36.4033			35.8733	35.4033	35.1367	35.28	36.43			34.5067	35.83	35.3467	35.2967	35.8133	36.0133	36.1867	35.4633	35.54	35.77	36.6833	35.4767	36.2433	36.3733
4.55	36.1467	36.1867	35.4667	36.18	36.4167			35.8567	35.3733	35.1133	35.1367	36.49			34.4267	35.8733	35.32	35.24	35.7967	35.96	36.26	35.4467	35.56	35.76	36.62	35.46	36.23	36.4333
4.56667	36.0967	36.16	35.4567	36.18	36.4067			35.8167	35.2833	35.06	35.0467	36.5333			34.45	35.8967	35.3	35.1967	35.7967	35.93	36.2967	35.4333	35.5733	35.7267	36.58	35.51	36.2167	36.4267
4.58333	36.0667	36.1533	35.4567	36.1133	36.3733			35.77	35.31	35.0733	35.11	36.5533			34.49	35.9267	35.2767	35.1667	35.8133	35.9467	36.2867	35.4067	35.5767	35.6833	36.5567	35.6333	36.2233	36.4233
4.6	36.0367	36.1567	35.5233	35.9933	36.3333			35.7433	35.2767	35.1033	35.1267	36.55			34.4933	35.96	35.3067	35.1467	35.84	35.94	36.2667	35.3733	35.5833	35.62	36.61	35.6833	36.17	36.44
4.61667	36.0167	36.1567	35.55	35.9133	36.2933			35.6933	35.09	35.1367	35.1267	36.51			34.49	35.9267	35.2833	35.1233	35.85	35.9233	36.26	35.34	35.5667	35.55	36.6233	35.7033	36.0933	36.4333
4.63333	36.0967	36.1467	35.5567	35.8533	36.2767			35.6633	34.8567	35.1267	35.1233	36.49			34.63	35.93	35.2067	35.1233	35.86	35.9567	36.2433	35.3033	35.5633	35.5133	36.6167	35.7267	36.14	36.4033
4.65	36.1233	36.1433	35.55	35.8033	36.2767			35.6533	34.7533	35.0733	35.16	36.49			34.7367	35.9633	35.1567	35.1233	35.8633	35.97	36.19	35.2967	35.5633	35.48	36.5967	35.7233	36.18	36.3367
4.66667	36.0967	36.1	35.53	35.74	36.2433			35.66	34.8	35.0833	35.0833	36.4467			34.7767	35.9667	35.13	35.12	35.86	36.0867	36.1533	35.2933	35.5533	35.4533	36.5967	35.7167	36.1933	36.3467
4.68333	36.0633	36.0633	35.5067	35.84	36.23			35.6633	35.1433	35.2667	34.9567	36.3833			34.74	36.01	35.1167	35.1167	35.8567	36.2267	36.12	35.2733	35.5467	35.4267	36.56	35.7367	36.2033	36.3567
4.7	36.0267	36.0733	35.4767	35.8433	36.2133			35.6567	35.3033	35.3533	34.94	36.4267			34.6667	36.0033	35.11	35.1333	35.8533	36.2833	36.0733	35.24	35.5333	35.3833	36.55	35.7633	36.2267	36.3267
4.71667	35.99	36.1633	35.4533	35.7667	36.2167			35.67	35.4133	35.3867	34.9633	36.4733			34.65	36.01	35.11	35.1433	35.8667	36.2767	36.03	35.2033	35.52	35.3533	36.5033	35.7833	36.2333	36.3033
4.73333	35.97	36.2133	35.4667	35.73	36.2133			35.7233	35.4433	35.5467	34.9767	36.4867			34.63	36.0633	35.13	35.1333	35.84	36.24	35.99	35.1633	35.51	35.3367	36.4233	35.8	36.2267	36.2967
4.75	35.9767	36.2033	35.4533	35.7167	36.25			35.7267	35.3867	35.6	34.98	36.4533			34.7	36.1267	35.11	35.1267	35.84	36.1933	35.99	35.1133	35.51	35.3133	36.3567	35.8133	36.16	36.29
4.76667	36.0067	36.2167	35.56	35.7233	36.2333			35.7067	35.4533	35.6333	34.9767	36.4767			34.85	36.25	35.0867	35.1633	35.85	36.1533	35.9933	35.08	35.5067	35.32	36.2867	35.8067	36.1167	36.2633
4.78333	36.0267	36.1967	35.61	35.7333	36.1867			35.7	35.5033	35.7	34.9733	36.5833			34.8533	36.4033	35.07	35.2367	35.8433	36.1233	35.92	35.0667	35.5	35.36	36.24	35.7933	36.0967	36.2433
4.8	36.0167	36.14	35.6067	35.7233	36.2233			35.6733	35.4567	35.71	34.9967	36.61			34.77	36.4833	35.06	35.2433	35.8233	36.11	35.87	35.05	35.4933	35.3333	36.21	35.7833	36.0933	36.2267
4.81667	36.01	36.08	35.5933	35.63	36.25			35.6467	35.4233	35.77	34.99	36.63			34.74	36.5567	35.05	35.2267	35.8	36.0767	35.84	35.0167	35.4933	35.2933	36.15	35.78	36.1367	36.1833
4.83333	35.9867	36.0533	35.54	35.6267	36.2333			35.64	35.5067	35.8067	34.96	36.62			34.6933	36.6	35.07	35.2267	35.78	36.0367	35.85	34.99	35.4933	35.26	36.0467	35.77	36.1267	36.1567
4.85	35.9733	36.0367	35.5033	35.6233	36.2333			35.67	35.5267	35.86	34.9167	36.62			34.6833	36.5967	35.0833	35.3467	35.72	36.02	35.9033	34.9767	35.4867	35.2967	35.9667	35.7233	36.1233	36.1533
4.86667	36	36.01	35.5267	35.6167	36.2433			35.74	35.45	35.8867	34.8767	36.6267			34.7267	36.5833	35.0833	35.4	35.6533	36.03	35.9433	34.9667	35.4867	35.3267	35.91	35.6767	36.1067	36.13
4.88333	36.0167	36.0267	35.6333	35.69	36.2967			35.7767	35.4333	35.8533	34.97	36.6167			34.82	36.58	35.1033	35.43	35.6767	36.0333	35.9633	34.9533	35.46	35.33	35.87	35.6333	36.07	36.08
4.9	36.0167	36.0767	35.7267	35.6933	36.3433			35.7567	35.4067	35.7567	34.9933	36.5933			34.9533	36.5267	35.11	35.4667	35.71	36.04	35.9733	34.9367	35.3733	35.3333	35.7967	35.6067	36.0467	36.0533
4.91667	36.0267	36.2167	35.7867	35.6733	36.3767			35.74	35.24	35.6667	35.0067	36.5767			34.96	36.4267	35.1067	35.4567	35.7133	36.08	35.9933	34.9433	35.3833	35.32	35.7367	35.6033	36.0267	36
4.93333	36.0533	36.2667	35.8033	35.6333	36.3833			35.7167	35.0333	35.7067	35.0433	36.54			34.93	36.3533	35.0933	35.4767	35.7033	36.1167	36.0033	35.0167	35.46	35.3033	35.74	35.62	36.04	35.9733
4.95	36.0733	36.2733	35.7867	35.6533	36.3367			35.6467	34.9567	35.74	35.0733	36.5367			34.9467	36.2933	35.1	35.4367	35.69	36.1667	36.02	35.0467	35.5267	35.2733	35.7667	35.61	36.0867	35.9333
4.96667	36.07	36.27	35.7433	35.7233	36.3333			35.5867	34.9933	35.72	35.0633	36.56			35.07	36.21	35.11	35.39	35.68	36.1833	36.0267	35.04	35.5633	35.2667	35.7567	35.6	36.1733	35.9233
4.98333	36.0267	36.2467	35.6633	35.71	36.3067			35.52	35.0233	35.7067	35.0633	36.5933			35.21	36.1467	35.0667	35.4233	35.6567	36.22	36.03	35.0567	35.56	35.23	35.7467	35.59	36.2067	35.9667
5	36.0033	36.2367	35.6433	35.6533	36.3			35.45	35.0267	35.7033	35.0567	36.61			35.29	36.08	35.05	35.4667	35.66	36.25	35.9967	35.0567	35.49	35.1867	35.8067	35.58	36.1933	35.9733
5.01667	35.9867	36.2267	35.69	35.61	36.3633			35.38	35.0167	35.6833	35.0833	36.6433			35.3833	36.04	35.0467	35.48	35.6733	36.27	35.96	35.1133	35.44	35.19	35.86	35.5633	36.17	35.91
5.03333	35.9833	36.1933	35.79	35.62	36.39			35.3933	34.9833	35.6567	35.1067	36.6767			35.6467	36.02	35.05	35.4967	35.66	36.28	35.9333	35.13	35.4267	35.1767	35.87	35.61	36.08	35.86
5.05	35.9833	36.1667	35.9033	35.6467	36.4133			35.4833	34.9533	35.6233	35.1167	36.7067			35.7333	35.9933	35.0433	35.5633	35.6367	36.2667	35.9067	35.1267	35.4167	35.1667	35.8633	35.62	36.0767	35.84
5.06667	36.0467	36.15	35.9033	35.6433	36.4533			35.5867	34.94	35.58	35.1067	36.6733			35.83	35.95	35.08	35.6067	35.6233	36.2433	35.9133	34.98	35.41	35.1667	35.85	35.6067	36.1267	35.8267
5.08333	36.0533	36.13	35.9067	35.6533	36.46			35.6	34.9267	35.52	35.0933	36.6167			35.8233	35.92	35.13	35.6833	35.5767	36.1633	35.9133	34.88	35.4033	35.1667	35.8533	35.5933	36.15	35.8333
5.1	36.0867	36.1567	35.94	35.6933	36.3733			35.6633	34.9167	35.4967	35.1233	36.5933			35.7433	35.8933	35.1467	35.75	35.5333	36.1567	35.9233	34.8767	35.4033	35.1767	35.8467	35.5567	36.1533	35.84
5.11667	36.18	36.16	35.94	35.6967	36.22			35.7933	34.8967	35.4667	35.1267	36.5733			35.6867	35.8633	35.19	35.7633	35.5133	36.2	35.9433	34.9433	35.4233	35.1833	35.8633	35.5833	36.14	35.8467
5.13333	36.3	36.16	35.94	35.6867	36.1667			36.0133	34.83	35.45	35.1333	36.55			35.6267	35.83	35.2067	35.73	35.5433	36.2167	35.95	34.97	35.4567	35.17	35.85	35.6267	36.1333	35.8367
5.15	36.36	36.1467	35.97	35.6867	36.1767			36.11	34.75	35.4833	35.1367	36.5333			35.5733	35.8133	35.1533	35.6733	35.58	36.25	35.9467	35.3367	35.4633	35.1833	35.76	35.6667	36.1067	35.8433
5.16667	36.3767	36.1233	35.9833	35.68	36.3033			36.1433	34.7167	35.48	35.12	36.5067			35.5	35.79	35.0967	35.63	35.6133	36.3233	35.98	35.5833	35.45	35.2033	35.7067	35.6567	36.07	35.8967
5.18333	36.3367	36.0467	35.9833	35.68	36.36			36.1367	34.7	35.4567	35.09	36.48			35.44	35.7867	35.06	35.6333	35.63	36.3233	36.01	35.59	35.4233	35.22	35.6833	35.6067	35.9433	35.9033
5.2	36.2933	36.0267	35.9767	35.6833	36.3533			36.1233	34.6933	35.43	35.07	36.4833			35.3833	35.83	35.1467	35.6267	35.65	36.2967	36.0233	35.5233	35.4067	35.23	35.6833	35.5767	35.8467	35.9
5.21667	36.2867	36.02	35.97	35.6833	36.31			36.1033	34.6767	35.3867	35.0567	36.45			35.3233	35.84	35.1867	35.5633	35.6833	36.2967	36.0267	35.5233	35.4133	35.2233	35.6867	35.6033	35.7833	35.8967
5.23333	36.31	35.9967	35.9767	35.63	36.2833			36.0833	34.66	35.3533	35.0667	36.4167			35.27	35.8333	35.21	35.5533	35.6967	36.28	36.01	35.53	35.4033	35.2167	35.6733	35.6467	35.72	35.9133
5.25	36.4167	35.9833	35.98	35.5967	36.25			36.0567	34.67	35.3167	35.0133	36.3733			35.2233	35.83	35.2333	35.5467	35.7	36.24	35.9567	35.5733	35.3467	35.2033	35.6533	35.72	35.6933	35.92
5.26667	36.4333	35.9967	35.9767	35.59	36.2633			36.0233	34.6767	35.2867	34.9833	36.35			35.1767	35.83	35.2867	35.5133	35.7933	36.2433	35.9533	35.5867	35.3033	35.1967	35.6467	35.7233	35.6533	35.92
5.28333	36.36	36.0267	35.9433	35.5667	36.3367			35.98	34.6767	35.26	34.9733	36.3467			35.14	35.8133	35.34	35.4767	35.86	36.2333	35.9633	35.5467	35.2733	35.2	35.6767	35.7133	35.7533	35.9
5.3	36.2533	36.1	35.93	35.5567	36.4033			35.9567	34.6633	35.2267	34.9767	36.34			35.1067	35.8333	35.3533	35.45	35.8633	36.2167	35.97	35.5467	35.28	35.22	35.7233	35.7467	35.86	35.8867
5.31667	36.1133	36.2333	35.9067	35.5267	36.4967			35.95	34.6333	35.1833	34.99	36.3267			35.0733	35.83	35.3333	35.44	35.8167	36.2233	35.9833	35.6533	35.2867	35.2233	35.7667	35.7733	35.8933	35.89
5.33333	36.13	36.3233	35.8767	35.5367	36.5167			35.95	34.59	35.14	35.02	36.3133			35.0433	35.82	35.3033	35.4333	35.7667	36.2333	35.9933	35.7	35.2767	35.2067	35.7867	35.7967	36.12	35.92
5.35	36.14	36.3433	35.8833	35.6933	36.5133			35.9533	34.5633	35.0933	35.0433	36.33			35.0233	35.8167	35.2967	35.39	35.7567	36.23	35.9833	35.6433	35.2633	35.1933	35.8367	35.8533	36.2267	35.97
5.36667	36.1333	36.3833	35.9067	35.7767	36.4667			35.9467	34.56	35.0633	35.05	36.3567			34.9967	35.7933	35.2467	35.32	35.7767	36.21	35.94	35.5967	35.2067	35.1967	35.8333	35.9233	36.2433	36.0133
5.38333	36.13	36.3767	35.96	35.9267	36.3967			35.96	34.5867	35.0967	34.9967	36.3533			34.9733	35.7567	35.18	35.2367	35.7767	36.1633	35.9333	35.5833	35.16	35.1867	35.7933	35.9367	36.27	36.0533
5.4	36.1233	36.3	35.99	35.95	36.3033			35.9533	34.59	35.12	34.8267	36.3533			34.9633	35.7233	35.1833	35.2367	35.7567	36.1067	35.9533	35.6033	35.1533	35.1233	35.75	35.9067	36.2833	36.0833
5.41667	36.1267	36.26	35.9733	35.9367	36.24			35.93	34.5333	35.1267	34.7	36.34			34.9467	35.6967	35.21	35.27	35.7467	36.0567	35.97	35.61	35.1233	35.0767	35.72	35.8967	36.2567	36.1167
5.43333	36.1067	36.1933	35.9833	35.9267	36.2067			35.92	34.53	35.1367	34.77	36.3167			34.9333	35.69	35.1667	35.2767	35.74	35.98	35.9733	35.6167	35.0367	35.1533	35.65	35.8967	36.21	36.14
5.45	36.1167	36.15	36.0633	35.9333	36.2			35.92	34.52	35.1433	34.7867	36.29			34.9333	35.6833	35.11	35.2767	35.73	35.92	35.9967	35.64	35.0133	35.2033	35.62	35.8567	36.1533	36.1533
5.46667	36.1933	36.2	36.0367	35.9067	36.2367			35.8667	34.45	35.18	34.8267	36.2467			34.9267	35.6567	35.1267	35.2333	35.7	35.8667	36.0367	35.64	34.9933	35.2	35.64	35.8033	36.0933	36.16
5.48333	36.39	36.23	35.9067	35.84	36.2533			35.78	34.4033	35.17	34.81	36.2433			34.91	35.6233	35.1133	35.23	35.6633	35.8367	36.0667	35.6367	34.96	35.1833	35.68	35.77	36.03	36.1667
5.5	36.4233	36.2567	35.9633	35.7967	36.2267			35.74	34.3833	35.1267	34.7967	36.2767			34.93	35.6033	35.15	35.24	35.6633	35.8433	36.11	35.6567	34.9567	35.1833	35.72	35.78	35.97	36.1667
5.51667	36.41	36.2367	36.1067	35.8133	36.2367			35.6967	34.38	35.1133	34.8867	36.3733			34.96	35.58	35.3167	35.2767	35.7	35.8533	36.13	35.6867	35.09	35.1633	35.7667	35.8	35.91	36.1733
5.53333	36.36	36.23	36.15	35.84	36.29			35.6933	34.38	35.1367	34.9733	36.4567			35.0233	35.5233	35.35	35.2933	35.72	35.8567	36.1367	35.6633	35.22	35.1467	35.8133	35.8167	35.8867	36.1733
5.55	36.3067	36.22	36.1733	35.8267	36.2767			35.7033	34.41	35.1567	34.9467	36.5033			35.0567	35.47	35.34	35.31	35.76	35.8533	36.1333	35.6333	35.3033	35.1033	35.86	35.8133	35.88	36.1667
5.56667	36.3633	36.2033	36.22	35.8033	36.2467			35.79	34.46	35.1633	35.01	36.5567			35.1533	35.44	35.31	35.3467	35.8167	35.88	36.1067	35.6067	35.3	35.04	35.8833	35.8067	35.87	36.1633
5.58333	36.4	36.1867	36.26	35.7833	36.2367			35.8933	34.4467	35.15	35.09	36.59			35.3033	35.4133	35.3	35.4167	35.87	35.8933	36.0233	35.5033	35.2733	35.0267	35.94	35.8367	35.8567	36.1467
5.6	36.53	36.1933	36.2733	35.7567	36.2733			35.9033	34.4433	35.1467	35.04	36.5467			35.3633	35.4	35.29	35.4633	35.8733	35.89	35.9333	35.4167	35.2533	34.9867	35.9733	35.8933	35.8767	36.1467
5.61667	36.57	36.1733	36.2367	35.77	36.2733			35.9233	34.4667	35.16	34.8433	36.5267			35.3867	35.3933	35.3167	35.48	35.8767	35.89	35.8533	35.3	35.2967	34.9467	35.9933	35.89	35.8967	36.1367
5.63333	36.5567	36.1433	36.17	35.7567	36.26			35.94	34.4667	35.14	34.86	36.5733			35.4133	35.3933	35.2933	35.48	35.8833	35.9	35.7733	35.1533	35.3367	34.98	35.9833	35.87	35.9067	36.1267
5.65	36.5033	36.1233	36.12	35.7333	36.2333			35.9367	34.46	35.1267	35.04	36.61			35.45	35.41	35.2933	35.4967	35.8533	35.92	35.7633	35.1133	35.3467	34.9733	36.0033	35.8467	35.9167	36.1233
5.66667	36.4267	36.1233	36.0867	35.7067	36.23			35.9267	34.5333	35.14	35.17	36.63			35.4733	35.4267	35.31	35.6	35.84	35.9333	35.74	35.1733	35.3633	34.93	36.0233	35.8267	35.9267	36.14
5.68333	36.4167	36.1367	36.0067	35.7133	36.2133			35.92	34.6567	35.15	35.2533	36.64			35.4833	35.4633	35.2567	35.6733	35.8633	35.9567	35.7733	35.38	35.3733	34.96	36.0233	35.8133	35.9467	36.14
5.7	36.3567	36.12	35.88	35.7	36.2133			35.9567	34.67	35.1467	35.4267	36.59			35.5033	35.48	35.1933	35.65	35.8233	36.03	35.82	35.4367	35.3867	35.1767	36.09	35.8033	35.9567	36.0867
5.71667	36.2933	36.0933	35.8433	35.6667	36.2033			35.9667	34.66	35.1467	35.5167	36.3867			35.51	35.4833	35.1633	35.6833	35.77	36.0667	35.9433	35.4167	35.39	35.2733	36.14	35.8267	35.93	36.0067
5.73333	36.24	36.07	35.8267	35.65	36.1933			35.99	34.6767	35.1467	35.51	36.3067			35.5167	35.48	35.1533	35.7333	35.7133	36.07	36.03	35.48	35.47	35.3	36.13	35.8467	35.8667	35.9467
5.75	36.21	36.0533	35.8333	35.62	36.1967			36.0367	34.97	35.1367	35.4867	36.31			35.5133	35.4767	35.13	35.7333	35.7067	36.0667	36.1367	35.48	35.54	35.36	36.1267	35.84	35.8333	35.91
5.76667	36.2	36.03	35.9233	35.5667	36.1967			36.2233	35.0567	35.15	35.4433	36.28			35.4767	35.4867	35.1033	35.7433	35.7067	36.05	36.1933	35.4233	35.5533	35.38	36.15	35.8433	35.83	35.8767
5.78333	36.1933	35.9767	36.0233	35.46	36.1933			36.31	35.0633	35.1967	35.4467	36.19			35.45	35.4933	35.06	35.7233	35.73	36.02	36.23	35.4267	35.5433	35.3967	36.15	35.8233	35.8167	35.8633
5.8	36.1967	35.9133	36.1267	35.21	36.1867			36.3667	35.0567	35.2633	35.4133	36.23			35.4433	35.5067	35.04	35.7267	35.7767	36	36.2067	35.45	35.5367	35.38	36.1067	35.81	35.7967	35.8533
5.81667	36.1833	35.8067	36.14	35.03	36.1933			36.4167	35.11	35.27	35.3167	36.3433			35.4367	35.51	35.1333	35.7833	35.77	35.98	36.21	35.4267	35.53	35.3267	36.0233	35.7933	35.8033	35.78
5.83333	36.1333	35.8267	36.1567	34.8267	36.19			36.4367	35.1233	35.2667	35.31	36.2933			35.4267	35.5067	35.1667	35.7867	35.75	35.9433	36.2233	35.38	35.51	35.2967	35.9867	35.78	35.7967	35.6533
5.85	36.0867	35.8933	36.14	34.7267	36.1867			36.4167	35.12	35.29	35.3867	36.4933			35.4733	35.4933	35.16	35.7367	35.8167	35.93	36.2333	35.3367	35.49	35.3267	36.06	35.7667	35.8033	35.67
5.86667	36.0767	35.91	36.15	34.6633	36.1867			36.33	35.1333	35.3167	35.43	36.5433			35.5067	35.47	35.1333	35.7067	35.8667	35.9267	36.3733	35.32	35.4467	35.4033	36.0367	35.7967	35.81	35.73
5.88333	36.1567	35.9933	36.1367	34.6733	36.1667			36.1567	35.1533	35.33	35.4167	36.5867			35.5	35.4467	35.0967	35.6933	35.8933	35.8867	36.42	35.2533	35.43	35.39	35.9967	35.82	35.8167	35.7967
5.9	36.1767	36.1267	36.07	34.82	36.15			36.0533	35.1333	35.3433	35.3667	36.6067			35.4967	35.4233	35.07	35.68	35.9033	35.8467	36.43	35.17	35.4167	35.3767	36.0167	35.85	35.8167	35.9067
5.91667	36.1867	36.15	36.0733	34.8767	36.16			36.03	35.0967	35.3533	35.3333	36.6133			35.5067	35.4167	35.0567	35.71	35.89	35.8133	36.4333	35.13	35.3467	35.4033	36.0033	35.8367	35.8033	36.0067
5.93333	36.1833	36.1667	36.1433	34.88	36.1467			36.02	35.0767	35.3567	35.3333	36.59			35.5133	35.4633	35.0567	35.6867	35.8667	35.83	36.4133	35.0967	35.33	35.41	35.92	35.82	35.78	36.0367
5.95	36.1567	36.1733	36.15	34.9367	36.1467			36.0333	35	35.37	35.45	36.59			35.5	35.4867	35.0533	35.6633	35.79	35.86	36.3833	35.0667	35.3367	35.4033	35.83	35.8033	35.7667	36.0433
5.96667	36.1133	36.1867	36.1133	35.0533	36.1433			36.0567	34.8867	35.3667	35.47	36.56			35.48	35.4967	35.0667	35.6233	35.7333	35.92	36.33	35.0367	35.3467	35.4333	35.7167	35.73	35.7533	36.04
5.98333	36.08	36.21	36.12	35.0933	36.14			35.9867	34.8433	35.3433	35.4567	36.4267			35.47	35.49	35.07	35.61	35.71	35.9267	36.2933	34.99	35.3433	35.41	35.6033	35.64	35.7467	36.0633
6	36.11	36.1933	36.2133	35.1233	36.1233			36	34.89	35.32	35.43	36.26			35.4533	35.48	35.0667	35.6333	35.69	35.9133	36.2633	34.96	35.2967	35.35	35.5267	35.6067	35.7333	36.0967

## Sheet: Tg(Myh11-CreERT2) Cap
Time	Tg(Myh11-CreERT2)-Cap								Tg(Myh11-CreERT2)-Veh								Tg(Myh11-CreERT2);Trpv1fl/fl-Cap								Tg(Myh11-CreERT2);Trpv1fl/fl-Veh
	S161	S562	T467	T751	U288	U893	U894	U896	S161	S562	T467	T751	U288	U893	U894	U896	S640	S558	T502	T506	T896				S640	S558	T502	T506	T896
-1	35.85	36.85	35.93	38.23	35.35	36.17	35.45	34.33	36	36.69	36.12	39.23	35.36	35.49	36.11	33.88	36.39	35.44	36.01	34.47	35.29				35.21	34.88	35.67	36.3	35.75
-0.983333	35.83	36.8	35.93	38.32	35.35	36.09	35.48	34.5	36.01	36.63	36.18	39.28	35.45	35.53	36.06	33.84	36.4	35.38	35.87	34.49	35.26				35.21	34.83	35.67	36.3	35.73
-0.966667	35.78	36.81	35.92	38.45	35.33	36.01	35.39	34.62	36.02	36.56	36.15	39.13	35.54	35.54	36.02	33.82	36.39	35.31	35.87	34.56	35.23				35.19	34.79	35.69	36.32	35.7
-0.95	35.76	36.9	35.88	38.56	35.3	35.97	35.31	34.79	36.07	36.53	36.19	38.74	35.6	35.54	36	33.8	36.35	35.3	35.88	34.6	35.2				35.18	34.77	35.69	36.32	35.68
-0.933333	35.75	36.89	35.79	38.55	35.26	35.9	35.37	34.89	36.13	36.47	36.08	38.5	35.62	35.53	35.98	33.79	36.32	35.33	35.94	34.6	35.16				35.15	34.72	35.69	36.3	35.65
-0.916667	35.74	36.88	35.68	38.5	35.25	35.82	35.41	34.94	36.18	36.49	36.02	38.47	35.63	35.5	35.94	33.78	36.28	35.39	35.97	34.57	35.15				35.09	34.68	35.68	36.27	35.57
-0.9	35.8	36.94	35.64	38.61	35.24	35.73	35.41	34.99	36.18	36.49	36.01	38.46	35.63	35.48	35.89	33.79	36.23	35.42	35.97	34.48	35.14				35.01	34.63	35.64	36.23	35.48
-0.883333	35.82	36.95	35.71	38.83	35.22	35.63	35.38	35.03	36.15	36.49	36.05	38.45	35.64	35.56	35.89	33.97	36.18	35.41	35.93	34.4	35.12				34.99	34.59	35.61	36.19	35.41
-0.866667	35.76	36.89	35.76	39	35.2	35.59	35.47	34.97	35.97	36.46	36.2	38.44	35.77	35.65	35.88	34.14	36.08	35.41	35.88	34.37	35.11				34.96	34.55	35.58	36.15	35.39
-0.85	35.7	36.9	35.77	39.06	35.2	35.54	35.55	34.84	35.5	36.42	36.42	38.4	35.79	35.98	35.88	34.16	35.92	35.49	35.8	34.35	35.11				34.88	34.49	35.55	36.15	35.38
-0.833333	35.61	36.97	35.77	39.17	35.2	35.5	35.7	34.8	35.27	36.36	36.52	38.33	35.79	36.34	35.89	34.16	35.84	35.57	35.73	34.83	35.11				34.83	34.44	35.51	36.18	35.38
-0.816667	35.58	37.1	35.65	39.2	35.2	35.53	35.71	34.8	35.47	36.34	36.5	38.22	35.79	36.58	35.91	34.13	35.77	35.61	35.67	35.04	35.11				34.78	34.38	35.48	36.19	35.38
-0.8	35.58	37.12	35.22	39.2	35.19	35.6	35.67	34.7	36.03	36.31	36.42	38.17	35.76	36.74	35.91	34.11	35.74	35.61	35.62	35.11	35.11				34.73	34.37	35.4	36.16	35.37
-0.783333	35.53	37.22	35	39.18	35.18	35.75	35.62	34.42	36.09	36.28	36.39	38.14	35.74	36.84	35.95	34.1	35.73	35.58	35.56	35.15	35.11				34.7	34.37	35.25	36.14	35.34
-0.766667	35.5	37.3	34.94	39.12	35.16	35.9	35.58	34.52	35.97	36.26	36.38	38.25	35.71	36.95	36	34.11	35.74	35.48	35.55	35.17	35.11				34.77	34.37	35.19	36.13	35.25
-0.75	35.46	37.31	34.92	39.06	35.17	35.94	35.55	34.76	35.82	36.22	36.36	38.38	35.7	37.04	36.05	34.09	35.73	35.34	35.57	35.19	35.09				34.79	34.37	35.18	36.14	35.18
-0.733333	35.44	37.25	34.93	38.99	35.23	35.93	35.53	34.85	35.85	36.17	36.33	38.46	35.69	37.02	36.08	34.07	35.71	35.28	35.69	35.2	35.09				34.79	34.37	35.22	36.15	35.13
-0.716667	35.43	37.21	35.03	38.9	35.34	35.88	35.48	34.95	35.88	36.12	36.31	38.56	35.66	37.06	36.18	34.08	35.69	35.25	35.78	35.2	35.09				34.79	34.37	35.24	36.16	35.12
-0.7	35.4	37.15	35.1	38.76	35.42	35.8	35.39	35.07	35.88	36.07	36.27	38.64	35.64	37.12	36.36	34.02	35.66	35.26	35.88	35.21	35.08				34.75	34.37	35.25	36.15	35.11
-0.683333	35.4	37.1	35.26	38.68	35.46	35.73	35.18	35.08	35.88	36.04	36.23	38.67	35.64	37.22	36.39	33.87	35.62	35.3	35.97	35.22	35.07				34.73	34.36	35.28	36.13	35.39
-0.666667	35.32	37.06	35.33	38.61	35.48	35.67	35.16	35.08	35.9	36.01	36.19	38.68	35.63	37.31	36.31	33.8	35.59	35.34	36.02	35.22	35.04				34.68	34.34	35.31	36.11	35.53
-0.65	35.31	37.01	35.35	38.62	35.49	35.6	35.21	35.11	35.94	35.99	36.13	38.67	35.62	37.32	36.3	34.02	35.56	35.41	36.01	35.17	35.03				34.63	34.32	35.36	36.09	35.76
-0.633333	35.45	36.97	35.37	38.68	35.5	35.54	35.28	35.2	35.95	35.96	36.05	38.66	35.56	37.2	36.47	34.1	35.53	35.46	35.96	35.2	35.03				34.61	34.31	35.37	36.07	35.88
-0.616667	35.49	36.91	35.38	38.7	35.52	35.51	35.28	35.34	35.93	35.93	35.97	38.61	35.45	37.14	36.49	34.11	35.5	35.49	35.91	35.33	35.05				34.61	34.3	35.37	36.05	35.92
-0.6	35.51	36.82	35.42	38.71	35.52	35.48	35.3	35.34	35.88	35.9	35.91	38.54	35.42	37.14	36.64	34.18	35.49	35.48	35.86	35.53	35.05				34.61	34.3	35.37	36.01	35.93
-0.583333	35.28	36.54	35.45	38.73	35.52	35.46	35.33	35.29	35.84	35.87	35.86	38.52	35.42	37.14	36.79	34.36	35.56	35.37	35.87	35.76	35.06				34.61	34.29	35.37	35.99	35.91
-0.566667	35.27	36.56	35.52	38.77	35.52	35.46	35.31	35.27	35.82	35.86	35.82	38.49	35.4	37.04	36.81	34.52	35.55	35.33	35.9	35.89	35.09				34.63	34.27	35.4	35.96	35.82
-0.55	35.45	36.55	35.55	38.81	35.48	35.48	35.24	35.26	35.66	35.85	35.79	38.46	35.41	36.84	36.81	34.54	35.43	35.4	35.97	35.93	35.15				34.65	34.27	35.46	35.95	35.62
-0.533333	35.41	36.53	35.64	38.84	35.44	35.48	35.19	35.25	35.53	35.84	35.79	38.45	35.53	36.71	36.74	34.35	35.4	35.5	36.05	35.86	35.22				34.65	34.27	35.47	36.03	35.51
-0.516667	35.37	36.53	35.72	38.84	35.4	35.47	35.13	35.24	35.5	35.82	35.82	38.45	35.64	36.88	36.68	34.35	35.44	35.59	36.13	35.8	35.25				34.66	34.27	35.45	36.17	35.43
-0.5	35.62	36.52	35.96	38.84	35.39	35.45	35.09	35.21	35.5	35.81	35.87	38.45	35.81	36.96	36.62	34.97	35.37	35.67	36.17	35.89	35.33				34.71	34.26	35.43	36.28	35.36
-0.483333	35.94	36.49	36	38.86	35.37	35.44	35.05	35.16	35.59	35.81	35.93	38.45	35.96	36.9	36.55	35.15	35.19	35.59	36.19	35.88	35.33				34.73	34.28	35.43	36.32	35.29
-0.466667	35.94	36.46	36.02	38.9	35.43	35.43	35.01	35.2	35.65	35.78	35.99	38.45	36.29	36.82	36.53	35.17	35.24	35.53	36.2	35.63	35.23				34.74	34.61	35.46	36.36	35.26
-0.45	35.87	36.46	36.03	38.9	35.45	35.33	34.98	35.24	35.68	35.73	36.03	38.45	36.44	36.68	36.58	35.34	35.36	35.54	36.2	35.54	35.21				34.74	34.72	35.46	36.37	35.31
-0.433333	35.77	36.47	36.01	38.9	35.44	35.37	34.94	35.24	35.68	35.73	36.05	38.46	36.46	36.55	36.58	35.4	35.38	35.57	36.27	35.71	35.25				34.73	34.73	35.44	36.35	35.33
-0.416667	35.6	36.44	36.04	38.9	35.4	35.62	34.91	35.17	35.64	35.73	36.05	38.58	36.3	36.62	36.53	35.06	35.38	35.58	36.27	36.02	35.32				34.7	34.74	35.41	36.32	35.33
-0.4	35.39	36.4	36.24	38.86	35.35	35.84	34.84	35.08	35.61	35.73	36.04	38.64	36.4	36.67	36.46	34.7	35.36	35.56	36.21	36.02	35.35				34.65	34.75	35.42	36.29	35.33
-0.383333	35.36	36.37	36.31	38.81	35.34	35.9	34.83	35.03	35.6	35.72	35.97	38.69	36.74	36.74	36.39	34.72	35.34	35.51	36.14	35.91	35.36				34.61	34.73	35.42	36.31	35.31
-0.366667	35.37	36.34	36.34	38.8	35.34	35.91	34.82	34.99	35.53	35.69	35.84	38.72	36.75	36.75	36.32	34.74	35.27	35.5	36.07	35.81	35.47				34.59	34.74	35.4	36.31	35.29
-0.35	35.36	36.33	36.52	38.79	35.35	35.89	34.79	34.95	35.44	35.65	35.82	38.75	36.66	36.68	36.25	34.59	35.22	35.51	36.03	35.81	35.5				34.58	34.77	35.32	36.33	35.26
-0.333333	35.42	36.32	36.57	38.79	35.4	35.84	34.82	34.93	35.42	35.61	35.8	38.76	36.76	36.57	36.19	34.54	35.21	35.5	35.99	35.83	35.47				34.58	34.81	35.28	36.35	35.25
-0.316667	35.68	36.32	36.63	38.79	35.38	35.86	34.82	34.93	35.38	35.57	35.79	38.77	36.76	36.45	36.14	34.58	35.21	35.51	35.89	35.84	35.47				34.58	34.82	35.29	36.33	35.24
-0.3	35.77	36.34	36.62	38.79	35.3	35.86	34.79	34.92	35.36	35.57	35.78	38.77	36.73	36.31	36.08	34.81	35.23	35.5	35.8	35.83	35.52				34.58	34.82	35.31	36.27	35.21
-0.283333	35.81	36.48	36.55	38.79	35.22	35.79	34.75	34.89	35.33	35.55	35.77	38.78	36.73	36.12	36.03	34.96	35.29	35.54	35.71	35.82	35.6				34.6	34.81	35.37	36.2	35.19
-0.266667	35.83	36.52	36.6	38.79	35.17	35.68	34.68	34.91	35.3	35.55	35.77	38.78	36.65	35.93	35.99	35.02	35.31	35.59	35.63	35.77	35.57				34.64	34.79	35.36	36.15	35.15
-0.25	35.82	36.53	36.57	38.78	35.16	35.6	34.67	34.97	35.29	35.55	35.76	38.78	36.54	35.77	35.95	35.05	35.32	35.63	35.56	35.69	35.39				34.72	34.66	35.33	36.12	35.13
-0.233333	35.75	36.53	36.45	38.75	35.4	35.52	34.8	35.01	35.27	35.56	35.78	38.75	36.62	35.64	35.88	35.05	35.29	35.65	35.54	35.62	35.43				34.91	34.52	35.29	36.18	35.17
-0.216667	35.7	36.53	36.58	38.74	35.82	35.49	35.09	35.08	35.27	35.56	35.87	38.72	36.81	35.51	35.85	35.05	35.27	35.7	35.53	35.58	35.46				35.05	34.5	35.27	36.25	35.15
-0.2	35.82	36.52	36.87	38.73	36.06	35.47	35.1	35.18	35.26	35.49	35.92	38.82	37.01	35.43	35.85	35.07	35.27	35.75	35.54	35.57	35.46				35.07	34.49	35.24	36.24	35.07
-0.183333	36.1	36.51	36.93	38.73	36.21	35.45	35.06	35.16	35.21	35.47	36.02	38.85	37.05	35.41	35.86	35.07	35.27	35.82	35.55	35.55	35.43				35	34.49	35.21	36.2	34.98
-0.166667	36.04	36.53	36.57	38.69	36.33	35.45	35.01	35.09	35.16	35.47	36.04	38.7	37.05	35.38	35.93	35.01	35.25	35.85	35.59	35.5	35.38				34.98	34.5	35.17	36.15	34.87
-0.15	35.95	36.59	36.39	38.68	36.55	35.46	34.97	34.93	35.13	35.47	36.05	38.73	37.01	35.33	35.94	34.93	35.26	35.83	35.63	35.47	35.32				34.97	34.5	35.14	36.11	34.88
-0.133333	35.89	36.65	36.51	38.68	36.54	35.45	34.9	34.9	35.09	35.48	36.11	39.1	36.93	35.27	35.93	34.83	35.27	35.73	35.67	35.4	35.29				34.97	34.52	35.14	36.06	34.93
-0.116667	35.87	36.69	36.42	38.63	36.35	35.41	34.78	35.03	35.14	35.5	36.18	39.16	36.89	35.2	35.9	34.73	35.25	35.61	35.73	35.31	35.22				34.95	34.53	35.18	36.01	35.11
-0.1	35.87	36.72	36.23	38.55	36.28	35.38	34.67	35.17	35.25	35.51	36.2	39.14	36.84	35.13	35.83	34.66	35.22	35.57	35.79	35.25	35.14				34.91	34.53	35.26	35.96	35.31
-0.0833333	35.85	36.72	36.02	38.53	36.23	35.35	34.61	35.24	35.35	35.52	36.2	39.06	36.78	35.11	35.77	34.63	35.16	35.56	35.85	35.23	35.08				34.89	34.53	35.27	35.93	35.61
-0.0666667	35.86	36.71	36.21	38.52	36.25	35.34	34.58	35.14	35.43	35.52	36.17	39.13	36.73	35.1	35.72	34.61	35.08	35.62	35.92	35.23	34.98				34.83	34.52	35.27	35.88	35.76
-0.05	35.85	36.69	37.03	38.51	36.32	35.34	34.56	34.85	35.48	35.52	36.09	39.34	36.67	35.07	35.71	34.61	35.01	35.67	35.95	35.35	34.94				34.79	34.5	35.25	35.8	35.95
-0.0333333	35.78	36.64	37.17	38.51	36.33	35.3	34.55	34.81	35.51	35.55	35.93	39.52	36.6	35.02	35.71	34.63	34.97	35.71	35.99	35.39	34.93				34.78	34.46	35.16	35.75	36.35
-0.0166667	35.72	36.61	37.12	38.58	36.33	35.26	34.55	34.91	35.55	35.56	35.88	39.55	36.51	34.97	35.69	34.62	34.92	35.73	35.98	35.38	34.93				34.79	34.4	35.18	35.71	36.42
0	35.66	36.63	37	38.66	36.27	35.19	34.54	35.39	35.58	35.57	35.82	39.51	36.45	34.95	35.67	34.56	34.89	35.76	35.95	35.35	34.95				34.79	34.36	35.19	35.69	36.41
0.0166667	35.63	36.63	36.85	38.68	36.21	35.13	34.61	35.9	35.58	35.57	35.8	39.48	36.42	34.96	35.65	34.6	34.86	35.77	35.91	35.33	35.06				34.78	34.35	35.19	35.71	36.27
0.0333333	35.61	36.62	36.73	38.12	36.25	34.46	34.77	36.04	35.56	35.56	35.3	39.14	36.37	34.7	35.69	34.95	34.87	35.8	35.88	35.31	35.21				34.83	34.39	35.22	35.72	36.26
0.05		36.61	36.61	37.74	36.32	34.43	34.81	36.09	35.52	35.54	34.93	38.28	36.38	34.53	35.73	35.13	34.89	35.84	35.88	35.3	35.24				34.85	34.44	35.23	35.77	36.33
0.0666667		36.69	34.99	37.63	36.49	34.6	34.06	36.12	35.5	35.51	34.69	38.29	36.56	34.81	35.24	35.15	34.02	35.88	36.01	35.4	35.02				34.77	34.42	35.24	36.11	36.18
0.0833333	34.53	36.91	34.79	37.57	36.68	34.69	34.08	36.1	34.6	35.64	34.47	38.39	36.71	35.24	35.17	35.14	33.68	35.93	36.13	35.51	34.91				34.58	34.51	35.24	36.36	36.11
0.1	34.51	36.98	34.45	37.49	36.8	34.63	34.24	35.61	34.59	35.76	34.48	38.47	36.81	35.66	35.24	35.18	33.37	34.92	36.19	35.5	34.64				34.3	34.24	34.26	36.53	36.04
0.116667	34.43	36.92	33.96	37.55	36.22	34.4	34.35	35.62	34.58	35.46	34.51	38.57	36.71	36.02	35.35	34.92	33.18	34.81	34.93	35.4	34.28				34.24	33.95	34.42	36.62	36.07
0.133333	34.12	36.25	33.28	37.49	36.2	34.25	34.27	35.72	34.64	35.16	34.91	38.65	36.83	36.29	35.4	34.86	33.12	34.7	34.79	35.31	33.91				34.37	33.88	34.68	35.73	36.16
0.15	33.74	36.05	32.71	37.37	36.3	34.28	34.01	35.75	34.71	35.01	34.96	38.63	36.95	36.47	35.62	34.88	33.06	34.57	34.65	34.97	33.6				34.43	33.87	34.83	35.81	36.21
0.166667	33.62	35.89	32.34	37.23	36.42	34.17	33.63	35.62	34.71	35.01	34.77	38.72	37	36.46	35.8	34.91	32.94	34.33	34.49	34.9	33.33				34.21	33.65	35.17	35.83	36.18
0.183333	33.63	35.69	32.05	36.89	36.44	33.84	33.31	35.45	34.33	35.23	34.51	38.77	36.98	36.41	35.86	34.99	32.81	34.11	34.39	34.61	33.08				33.94	33.47	35.41	35.82	36.15
0.2	33.56	35.42	31.81	36.86	36.42	33.59	32.98	35.26	34.11	35.55	34.48	38.81	36.77	36.61	35.96	34.98	32.66	33.9	34.22	34.11	32.85				33.93	33.56	35.49	35.84	36.12
0.216667	33.45	35.27	31.59	36.87	36.25	33.23	32.61	35.04	34.23	35.74	34.76	38.85	36.7	36.78	36.03	34.91	32.5	33.71	34.02	34.15	32.63				33.91	33.59	35.77	35.88	35.98
0.233333	33.35	35.14	31.39	36.87	36.2	32.92	32.26	34.87	34.45	35.96	34.99	38.86	36.69	36.93	36.05	34.8	32.34	33.53	33.85	34.21	32.41				33.99	33.62	35.86	35.95	35.95
0.25	33.28	35	31.2	36.89	36.08	32.6	31.87	34.61	34.53	36.07	35.54	38.77	36.76	37	36.02	34.73	32.18	33.35	33.67	34.23	32.21				34.13	33.68	35.7	36.04	36
0.266667	33.19	34.84	31.04	36.96	35.87	32.36	31.62	34.29	34.66	36.13	35.65	38.59	36.9	37.11	35.99	34.63	32.02	33.18	33.48	34.2	32.01				34.3	33.67	35.62	36.16	36.01
0.283333	33.04	34.6	30.88	37.03	35.58	32.12	31.41	34.02	34.52	36.14	35.76	38.61	36.96	37.22	36.03	34.5	31.86	33.01	33.26	34.11	31.82				34.38	33.62	35.59	36.28	35.99
0.3	32.81	34.17	30.75	37.11	35.33	31.91	31.22	33.77	34.53	36.2	36.17	38.64	36.94	37.32	36.2	34.31	31.71	32.87	33	34	31.65				34.35	33.54	35.64	36.28	36.03
0.316667	32.64	33.81	30.63	37.07	35.12	31.67	30.98	33.59	34.62	36.26	36.42	38.64	36.94	37.31	36.17	34.1	31.57	32.79	32.89	33.88	31.5				34.49	33.6	35.74	36.29	36.18
0.333333	32.56	33.48	30.51	36.95	34.91	31.5	30.69	33.46	34.32	36.28	36.55	38.6	37.07	37.33	35.99	34	31.44	32.68	32.8	33.78	31.36				34.54	33.57	35.79	36.43	36.17
0.35	32.52	33.19	30.4	36.86	34.72	31.39	30.46	33.36	34.19	36.25	36.54	38.56	37.15	37.33	35.91	33.89	31.31	32.56	32.7	33.67	31.28				34.33	33.36	35.83	36.51	36.28
0.366667	32.37	32.92	30.31	36.73	34.53	31.32	30.26	33.27	34.3	36.24	36.46	38.55	37.22	37.42	36.08	33.84	31.19	32.42	32.61	33.55	31.21				34.17	33.32	35.83	36.53	36.36
0.383333	32.19	32.67	30.22	36.76	34.38	31.28	30.14	33.22	34.8	36.24	36.26	38.5	37.2	37.42	36.28	33.92	31.07	32.27	32.51	33.42	31.18				34.14	33.49	35.89	36.53	36.45
0.4	32.1	32.43	30.13	37.01	34.28	31.26	30.05	33.16	35	36.33	36.41	38.49	37.16	37.36	36.49	34.03	30.97	32.14	32.41	33.28	31.14				34.3	33.59	36.05	36.58	36.42
0.416667	32.04	32.21	30.11	37.11	34.25	31.26	29.88	33.15	35.15	36.39	36.45	38.49	37.04	37.42	36.53	34.03	30.86	32.03	32.31	33.12	31.11				34.47	33.76	36.06	36.65	36.23
0.433333	32.01	32	30.12	37.08	34.18	31.23	29.81	33.13	35.27	36.39	36.37	38.47	37	37.47	36.57	33.95	30.75	31.93	32.21	32.98	31.09				34.56	33.87	36.24	36.63	36.16
0.45	32	31.82	30.06	37.01	34.15	31.12	29.78	33.08	35.27	36.35	36.41	38.41	37.02	37.46	36.71	33.71	30.64	31.84	32.11	32.83	31.07				34.63	34	36.48	36.6	36.41
0.466667	32.04	31.66	29.96	37.05	34.12	31.06	29.75	33.02	35.22	36.37	36.44	38.41	36.86	37.42	36.87	33.55	30.53	31.69	31.98	32.68	31.04				34.64	34.14	36.52	36.53	36.52
0.483333	32.04	31.56	29.9	37.09	34.08	30.95	29.8	32.94	35.38	36.43	36.41	38.54	36.39	37.44	37	33.61	30.43	31.54	31.84	32.51	31.05				34.88	34.14	36.5	36.44	36.51
0.5	31.97	31.49	29.87	37.09	34.01	30.93	29.84	32.75	35.46	36.53	36.33	38.65	36.36	37.45	37.11	33.66	30.32	31.38	31.74	32.36	31.07				35.05	34.14	36.44	36.41	36.43
0.516667	31.96	31.44	29.85	37.07	33.93	30.94	29.87	32.58	35.53	36.91	36.31	38.87	36.78	37.49	37.13	33.7	30.22	31.21	31.64	32.2	31.11				35.14	34.2	36.44	36.42	36.38
0.533333	32.05	31.43	29.84	36.97	33.88	31.01	29.91	32.48	35.32	37.13	36.41	39.16	36.99	37.5	37.08	33.71	30.12	31.04	31.56	32.05	31.19				35.27	34.36	36.53	36.43	36.4
0.55	32.07	31.4	29.84	36.89	33.84	31.05	29.91	32.47	35.16	37.18	36.36	39.36	36.64	37.49	37.21	33.66	30.03	30.86	31.48	31.9	31.24				35.28	34.45	36.38	36.41	36.39
0.566667	31.99	31.32	29.85	36.94	33.78	31.09	29.81	32.42	35.16	37.12	36.03	39.52	36.32	37.5	37.35	33.56	29.94	30.69	31.4	31.75	31.29				35.22	34.51	36.27	36.34	36.28
0.583333	31.83	31.21	29.87	36.97	33.73	31.26	29.59	32.38	35.23	37.07	36.22	39.54	36.45	37.49	37.43	33.4	29.85	30.52	31.32	31.6	31.33				35.04	34.44	36.63	36.3	36.17
0.6	31.71	31.12	29.89	37	33.66	31.47	29.53	32.33	35.35	37.04	36.36	39.49	36.88	37.47	37.53	33.22	29.77	30.36	31.25	31.48	31.35				34.89	34.23	36.63	36.27	36.29
0.616667	31.63	31.07	29.91	37	33.6	31.63	29.47	32.26	35.51	36.89	36.53	39.31	37.21	37.47	37.55	33.2	29.68	30.22	31.18	31.37	31.36				34.85	34.18	36.46	36.26	36.37
0.633333	31.61	31.02	29.91	36.87	33.53	31.69	29.43	32.09	35.77	36.69	36.75	39.12	37.36	37.48	37.55	33.18	29.6	30.07	31.11	31.26	31.39				34.91	34.16	36.35	36.23	36.39
0.65	31.7	31	29.91	36.52	33.45	31.74	29.4	31.84	35.91	36.67	36.84	38.95	37.38	37.47	37.56	33.16	29.52	29.94	31.06	31.15	31.46				35.02	34.15	36.28	36.19	36.27
0.666667	31.73	30.98	29.9	36.36	33.4	31.74	29.43	31.76	35.97	36.64	36.88	38.82	37.44	37.48	37.58	33.22	29.45	29.8	31	31.05	31.52				35.36	34.18	36.27	36.15	36.34
0.683333	31.72	30.97	29.88	36.29	33.32	31.82	29.48	31.74	35.91	36.47	36.87	38.8	37.48	37.52	37.58	33.22	29.38	29.67	30.95	30.93	31.51				35.55	34.32	36.27	36.22	36.34
0.7	31.66	30.98	29.9	36.31	33.27	31.99	29.66	31.74	35.76	36.41	36.85	38.83	37.3	37.44	37.64	33.22	29.32	29.55	30.91	30.82	31.47				35.68	34.45	36.26	36.22	35.92
0.716667	31.56	31.02	29.93	36.38	33.23	32.08	29.72	31.76	35.65	36.6	36.62	38.85	36.67	37.45	37.74	33.2	29.26	29.45	30.86	30.71	31.42				35.94	34.58	36.3	36.16	35.62
0.733333	31.43	31.06	29.91	36.47	33.19	32.23	29.72	31.8	36.06	36.63	36.55	38.89	36.4	37.56	37.68	33.11	29.2	29.34	30.8	30.61	31.42				35.98	34.67	36.37	36.11	35.58
0.75	31.36	31.12	29.84	36.54	33.18	32.26	29.81	31.75	36.51	36.57	36.57	38.93	36.43	37.61	37.54	33.06	29.14	29.25	30.75	30.5	31.52				35.84	34.88	36.42	36.08	35.64
0.766667	31.33	31.21	29.76	36.6	33.28	32.23	29.98	31.7	36.3	36.5	36.56	38.97	37.17	37.57	37.52	33.05	29.08	29.17	30.69	30.41	31.57				35.74	34.84	36.43	36.08	35.83
0.783333	31.33	31.28	29.66	36.62	33.34	32.15	30.13	31.69	36.07	36.68	36.55	39.02	37.27	37.46	37.58	33.07	29.03	29.1	30.64	30.32	31.53				35.8	34.79	36.46	36.16	36.02
0.8	31.35	31.35	29.57	36.63	33.4	32.13	30.25	31.68	36.02	36.78	36.58	39.05	36.97	37.5	37.55	33.11	28.98	29.03	30.59	30.24	31.45				35.81	34.89	36.56	36.19	36.2
0.816667	31.38	31.43	29.49	36.64	33.41	32.19	30.36	31.67	35.98	36.78	36.55	39.09	36.42	37.49	37.48	33.23	28.94	28.97	30.54	30.15	31.42				35.92	34.69	36.64	36.14	36.22
0.833333	31.43	31.5	29.41	36.67	33.39	32.2	30.45	31.67	35.82	36.77	36.44	39.13	36.22	37.4	37.47	33.31	28.89	28.92	30.5	30.07	31.4				35.92	34.52	36.82	36.11	36.12
0.85	31.47	31.58	29.34	36.69	33.36	32.19	30.55	31.68	35.82	36.71	36.43	39.13	36.21	37.28	37.41	33.31	28.85	28.86	30.45	29.99	31.52				35.83	34.43	36.81	36.09	36
0.866667	31.52	31.69	29.28	36.72	33.35	32.19	30.71	31.7	35.82	36.69	36.51	39.13	36.31	37.11	37.39	33.28	28.8	28.79	30.41	29.93	31.61				35.82	34.31	36.64	36.05	36.06
0.883333	31.56	31.89	29.22	36.75	33.37	32.3	30.82	31.71	35.73	36.69	36.52	39.14	36.47	37.07	37.41	33.3	28.75	28.72	30.37	29.87	31.63				35.98	34.16	36.54	36.01	36.18
0.9	31.61	31.93	29.19	36.79	33.42	32.39	31.06	31.74	35.56	36.72	36.47	39.22	36.68	37.04	37.41	33.3	28.76	28.66	30.33	29.8	31.87				36.22	34.16	36.51	35.97	36.35
0.916667	31.68	31.93	29.16	36.84	33.47	32.53	31.16	31.76	35.54	36.74	36.4	39.31	36.72	36.94	37.46	33.37	28.75	28.6	30.29	29.74	31.97				36.23	34.29	36.5	35.96	36.37
0.933333	31.75	32.01	29.14	36.87	33.57	32.61	31.11	31.8	35.43	36.74	36.38	39.31	36.7	36.85	37.5	33.43	28.7	28.53	30.26	29.69	31.97				36	34.38	36.47	35.99	36.37
0.95	31.84	32.04	29.15	36.88	33.71	32.68	31.01	31.83	35.33	36.73	36.35	39.28	36.67	36.82	37.46	33.47	28.63	28.42	30.23	29.66	31.96				35.84	34.41	36.43	36.11	36.37
0.966667	31.91	32.09	29.22	36.73	33.82	32.61	31.26	31.85	35.33	36.69	36.35	39.25	36.74	36.85	37.42	33.52	28.57	28.33	30.19	29.61	31.94				35.82	34.44	36.42	36.15	36.37
0.983333	32	32.12	29.27	36.53	33.91	32.45	31.37	31.87	35.29	36.56	36.38	39.19	36.77	36.85	37.36	33.5	28.53	28.27	30.15	29.55	31.89				35.55	34.42	36.39	36.2	36.37
1	32.1	32.17	29.31	36.45	34.11	32.29	31.42	31.88	35.37	36.69	36.43	39.23	36.77	36.86	37.24	33.42	28.49	28.22	30.11	29.51	31.82				35.45	34.35	36.35	36.25	36.37
1.01667	32.18	32.23	29.34	36.43	34.16	31.9	31.81	31.9	35.43	36.77	36.42	39.31	36.73	36.87	37.19	33.4	28.46	28.17	30.08	29.47	31.83				35.4	34.7	36.31	36.25	36.36
1.03333	32.28	32.3	29.37	36.41	34.16	31.71	32.15	31.92	35.46	36.79	36.6	39.35	36.66	36.87	37.26	33.42	28.42	28.13	30.04	29.42	31.82				35.44	34.95	36.29	36.26	36.33
1.05	32.36	32.4	29.4	36.4	34.18	31.51	32.31	31.94	35.59	36.79	36.65	39.36	36.62	36.83	37.28	33.6	28.39	28.07	30.02	29.38	31.73				35.43	35.01	36.23	36.32	36.29
1.06667	32.43	32.49	29.43	36.4	34.19	31.34	32.44	31.94	35.72	36.76	36.64	39.37	36.55	36.71	37.26	33.84	28.37	28.02	30	29.33	31.73				35.45	34.91	36.17	36.3	36.26
1.08333	32.51	32.54	29.46	36.4	34.16	31.36	32.57	31.92	35.79	36.74	36.73	39.37	36.54	36.62	37.23	33.9	28.35	27.98	29.98	29.28	31.9				35.63	34.82	36.12	36.26	36.25
1.1	32.6	32.58	29.48	36.4	34.15	31.53	32.7	31.88	35.78	36.71	36.79	39.37	36.22	36.58	37.18	33.89	28.34	27.93	29.9	29.26	31.99				35.81	34.69	36.08	36.25	36.21
1.11667	32.71	32.59	29.5	36.41	34.22	31.99	32.82	31.86	35.8	36.69	36.82	39.38	36.04	36.58	37.18	33.94	28.33	27.89	29.85	29.24	32.05				35.67	34.35	36.04	36.25	36.18
1.13333	32.79	32.6	29.54	36.43	34.34	32.3	32.94	31.85	36.05	36.66	36.85	39.36	36.1	36.61	37.22	33.98	28.32	27.85	29.84	29.19	32.14				35.53	34.21	36	36.25	36.16
1.15	32.87	32.72	29.6	36.46	34.4	32.51	33.04	31.84	36.07	36.62	36.83	39.27	36.11	36.69	37.25	34.01	28.3	27.82	29.87	29.15	32.27				35.55	34.33	35.8	36.25	36.18
1.16667	32.88	32.82	29.62	36.56	34.37	32.55	33.16	31.77	36.07	36.6	36.64	39.21	36.05	36.79	37.22	34.03	28.29	27.83	29.91	29.1	32.36				35.49	34.78	35.81	36.23	36.23
1.18333	32.88	32.91	29.61	36.68	34.32	32.55	33.33	31.75	36.07	36.6	36.64	39.23	35.91	36.97	37.12	33.98	28.26	27.86	29.92	29.05	32.44				35.31	34.95	35.88	36.22	36.22
1.2	32.8	32.99	29.55	36.87	34.45	32.43	33.62	31.75	36.07	36.59	36.6	39.23	35.88	37.07	37.01	33.61	28.24	27.85	29.93	29	32.48				35.28	34.96	35.91	36.23	36.2
1.21667	32.64	33.08	29.47	36.89	34.53	32.25	33.69	31.77	36.06	36.57	36.43	39.24	35.9	37.1	36.96	33.19	28.22	27.82	29.92	28.96	32.52				35.37	34.84	35.92	36.25	36.19
1.23333	32.68	33.17	29.43	36.93	34.59	32.15	33.74	31.78	36.09	36.54	36.12	39.24	35.85	37.1	36.98	33.03	28.28	27.78	29.87	28.93	32.6				35.43	34.48	35.92	36.25	36.18
1.25	32.76	33.26	29.43	36.93	34.8	32.34	33.87	31.8	36.16	36.51	35.95	39.25	35.72	37.2	37.01	32.95	28.29	27.76	29.83	28.89	32.7				35.62	34.29	35.9	36.25	36.17
1.26667	32.76	33.37	29.44	36.89	34.87	32.77	33.97	31.82	36.17	36.5	36.28	39.26	35.6	37.29	37.06	32.95	28.22	27.77	29.8	28.86	32.73				35.85	34.21	35.87	36.23	36.17
1.28333	32.57	33.48	29.46	36.82	34.88	33.08	34.15	31.87	36.16	36.5	36.54	39.27	35.58	37.19	37.07	33.06	28.17	27.76	29.77	28.83	32.76				35.92	34.22	35.84	36.19	36.15
1.3	32.22	33.58	29.48	36.78	34.84	33.39	34.38	31.91	36.13	36.5	36.66	39.28	35.55	37.11	37.09	33.14	28.15	27.75	29.73	28.8	32.76				35.88	34.31	35.77	36.16	36.14
1.31667	32.22	33.67	29.53	36.77	34.89	33.66	34.51	31.95	36.13	36.5	36.71	39.29	35.69	37.1	37.12	33.22	28.04	27.76	29.73	28.77	32.76				35.8	34.31	35.74	36.19	36.12
1.33333	32.32	33.78	29.59	36.73	34.92	33.73	34.6	32.01	36.13	36.5	36.74	39.3	35.94	37.07	37.12	33.28	27.89	27.77	29.73	28.75	32.79				35.8	34.26	35.72	36.19	36.09
1.35	32.65	33.82	29.61	36.65	34.96	33.73	34.71	32.05	36.12	36.5	36.75	39.3	36.05	36.98	37.12	33.35	27.86	27.84	29.75	28.73	32.85				35.83	34.37	35.68	36.17	36.08
1.36667	32.91	33.76	29.65	36.66	34.97	33.78	34.79	32.1	36.07	36.51	36.71	39.3	36.14	36.84	37.12	33.39	27.84	27.97	29.77	28.69	32.84				35.85	34.43	35.59	36.17	36.13
1.38333	32.91	33.6	29.68	36.61	34.97	33.79	34.97	32.14	35.93	36.53	36.63	39.37	36.19	36.68	37.02	33.45	27.77	28	29.81	28.65	32.85				35.86	34.47	35.47	36.11	36.17
1.4	32.95	33.51	29.76	36.63	35.01	33.83	35.1	32.19	35.59	36.48	36.56	39.47	36.18	36.54	36.97	33.51	27.76	28.02	29.84	28.62	32.97				35.86	34.54	35.41	36.06	36.18
1.41667	33.12	33.54	29.98	36.68	35.06	34.09	35.29	32.23	35.61	36.4	36.65	39.51	36.14	36.39	36.98	33.55	27.77	28.05	29.89	28.59	32.99				35.95	34.59	35.37	36.03	36.18
1.43333	33.09	33.62	30.04	36.68	35.13	34.19	35.41	32.28	35.68	36.39	36.66	39.52	36.1	36.26	37.02	33.64	27.79	28.1	29.98	28.56	33				36.13	34.6	35.35	36.01	36.17
1.45	33.14	33.61	30.02	36.68	35.19	34.2	35.44	32.33	35.64	36.38	36.6	39.53	35.95	36.15	37	33.64	27.8	28.16	30.11	28.53	33.08				36.22	34.7	35.36	36	36.14
1.46667	33.54	33.59	29.93	36.67	35.24	34.24	35.43	32.38	35.51	36.36	36.56	39.52	35.8	36.08	36.84	33.25	27.8	28.21	30.13	28.5	33.21				36.29	35.01	35.47	36.01	36.1
1.48333	33.74	33.59	29.85	36.67	35.28	34.4	35.49	32.43	35.48	36.42	36.56	39.49	35.74	35.98	36.74	33.08	27.75	28.27	30.24	28.48	33.32				36.33	35.12	35.5	36.01	36.08
1.5	33.82	33.81	29.82	36.67	35.33	34.51	35.59	32.48	35.42	36.52	36.54	39.44	35.73	35.87	36.82	33.17	27.59	28.34	30.41	28.45	33.46				36.34	35.18	35.48	36.01	36.05
1.51667	33.91	33.84	29.82	36.66	35.37	34.71	35.83	32.53	35.37	36.55	36.54	39.39	35.74	35.78	36.85	33.25	27.56	28.35	30.46	28.42	33.55				36.34	35.13	35.47	36.18	36.03
1.53333	34.01	34.04	29.86	36.77	35.42	34.7	35.94	32.88	35.7	36.52	36.57	39.36	35.75	35.77	36.82	33.38	27.56	28.36	30.52	28.39	33.69				36.3	34.89	35.5	36.24	35.95
1.55	34.09	34.17	29.86	37.08	35.46	34.89	35.98	33.19	35.81	36.42	36.56	39.36	35.75	35.88	36.8	33.49	27.47	28.38	30.62	28.37	33.81				35.99	34.93	35.44	36.26	35.89
1.56667	34.19	34.19	29.87	37.22	35.49	35.21	36.07	33.31	35.79	36.48	36.55	39.32	35.74	35.86	36.78	33.53	27.43	28.51	30.66	28.35	33.96				35.8	35.17	35.41	36.24	35.87
1.58333	34.27	34.17	29.95	37.33	35.51	35.33	36.16	33.38	35.7	36.48	36.55	39.32	35.72	35.8	36.76	33.6	27.41	28.56	30.71	28.33	34.07				35.81	35.26	35.41	36.2	35.86
1.6	34.37	34.18	30.06	37.44	35.58	35.46	36.18	33.5	35.67	36.45	36.54	39.32	35.71	35.79	36.77	33.71	27.39	28.65	30.79	28.3	34.09				35.91	35.32	35.46	36.16	35.86
1.61667	34.45	34.22	30.2	37.44	35.69	35.61	36.18	33.56	35.65	36.46	36.53	39.32	35.7	35.76	36.79	33.77	27.36	28.71	30.86	28.29	34.19				35.92	35.2	35.51	36.12	35.92
1.63333	34.5	34.44	30.44	37.41	35.71	35.65	36.18	33.57	35.64	36.45	36.63	39.36	35.68	35.69	36.81	33.83	27.33	28.7	30.92	28.28	34.28				35.78	35.17	35.46	36.1	35.93
1.65	34.55	34.6	30.42	37.46	35.73	35.66	36.25	33.61	35.61	36.4	36.79	39.41	35.68	35.61	36.79	33.87	27.31	28.79	31.01	28.28	34.31				35.71	35.35	35.45	36.07	35.94
1.66667	34.6	34.91	30.35	37.54	35.75	35.69	36.41	33.59	35.59	36.38	37.01	39.49	35.66	35.54	36.73	33.92	27.31	28.88	31.25	28.27	34.57				35.93	35.4	35.45	36.03	36.06
1.68333	34.47	35	30.37	37.62	35.75	35.73	36.56	33.64	35.59	36.32	37.08	39.52	35.64	35.47	36.64	33.96	27.31	28.95	31.51	28.25	34.69				35.94	35.41	35.45	36.02	36.14
1.7	34.34	35.05	30.59	37.63	35.76	35.75	36.61	33.89	35.59	36.37	37.15	39.54	35.63	35.42	36.55	33.97	27.31	29.06	31.74	28.24	34.73				35.85	35.38	35.44	36.02	36.1
1.71667	34.5	35.15	30.69	37.5	35.83	35.83	36.62	33.98	35.59	36.47	37.16	39.61	35.63	35.39	36.47	34.02	27.3	29.2	31.92	28.22	34.91				35.68	35.23	35.5	35.92	36.04
1.73333	34.64	35.28	30.7	37.44	35.86	35.93	36.67	34.17	35.58	36.46	37.08	39.67	35.63	35.34	36.38	34.05	27.29	29.24	32.09	28.21	34.94				35.5	35.07	35.64	35.83	36.02
1.75	34.67	35.45	30.76	37.46	35.86	35.98	36.75	34.24	35.61	36.49	36.84	39.71	35.63	35.3	36.28	34.05	27.28	29.28	32.3	28.19	34.89				35.72	34.95	35.65	35.82	35.98
1.76667	34.63	35.56	30.86	37.56	35.85	36.07	36.77	34.3	35.63	36.86	36.55	39.73	35.55	35.29	36.19	34.11	27.27	29.4	32.48	28.18	34.97				35.79	34.9	35.64	35.82	35.96
1.78333	34.52	35.62	31.11	37.71	35.94	36.15	36.86	34.33	35.64	37	36.32	39.73	35.47	35.29	36.19	34.1	27.24	29.53	32.66	28.17	35.18				35.64	34.93	35.62	35.74	35.99
1.8	34.39	35.67	31.15	37.62	35.98	36.2	36.86	34.46	35.65	37.05	36.34	39.72	35.37	35.28	36.23	33.93	27.18	29.65	32.8	28.16	35.23				35.46	34.89	35.6	35.68	36.22
1.81667	34.34	35.72	31.15	37.36	35.98	36.27	36.8	34.59	35.69	37.04	36.48	39.68	35.41	35.27	36.24	33.81	27.16	29.68	33	28.15	35.31				35.55	34.81	35.6	35.69	36.34
1.83333	34.32	35.76	31.18	37.26	35.98	36.31	36.62	34.68	35.72	37.01	36.49	39.65	36.24	35.24	36.21	33.97	27.16	29.73	33.18	28.14	35.43				35.62	34.96	35.64	35.74	36.35
1.85	34.34	35.8	31.23	37.36	35.98	36.36	36.56	34.7	35.74	36.99	36.46	39.57	36.33	35.21	36.23	34.1	27.15	29.83	33.33	28.13	35.62				35.68	35.29	35.64	35.73	36.37
1.86667	34.41	35.84	31.27	37.45	35.96	36.34	36.57	34.56	35.77	36.91	36.43	39.54	36.03	35.19	36.25	34.51	27.11	29.88	33.51	28.13	35.67				35.68	35.36	35.61	35.71	36.38
1.88333	34.46	35.88	31.36	37.96	35.93	36.19	36.54	34.51	35.79	36.86	36.38	39.55	36.07	35.19	36.23	34.91	27.12	29.91	33.64	28.14	35.66				35.67	35.37	35.6	35.71	36.32
1.9	34.4	35.94	31.44	37.99	35.92	36.28	36.46	34.58	35.86	36.86	36.33	39.63	36.17	35.19	36.29	34.88	27.15	30.01	33.79	28.16	35.67				35.65	35.37	35.57	35.69	36.3
1.91667	34.4	35.95	31.5	37.86	35.93	36.39	36.36	34.73	35.83	36.83	36.33	39.7	36.21	35.18	36.37	34.27	27.18	30.08	33.93	28.19	35.77				35.68	35.37	35.55	35.68	36.28
1.93333	34.41	35.87	31.53	37.89	35.96	36.47	36.4	34.78	35.75	36.75	36.51	39.75	36.22	35.13	36.53	34.04	27.18	30.1	34.05	28.19	35.93				35.72	35.36	35.52	35.66	36.24
1.95	34.44	35.91	31.53	37.97	35.94	36.63	36.35	34.88	35.74	36.69	36.59	39.76	36.24	35.06	36.55	34.02	27.19	30.15	34.22	28.2	35.93				35.84	35.31	35.53	35.72	36.2
1.96667	34.51	36	31.49	37.9	35.89	36.8	36.18	35.01	35.79	36.62	36.64	39.77	36.26	35.06	36.53	34.01	27.2	30.17	34.42	28.23	35.75				35.87	35.27	35.63	36.05	36.08
1.98333	34.51	36.04	31.52	37.75	35.92	36.89	36.19	35.05	36.07	36.56	36.64	39.75	36.26	35.1	36.47	33.99	27.25	30.2	34.58	28.24	35.69				35.86	35.23	35.65	36.19	36.03
2	34.55	36.07	31.58	37.72	36	36.88	36.28	35	36.19	36.52	36.61	39.7	36.27	35.13	36.24	33.95	27.3	30.27	34.72	28.26	35.65				35.88	35.17	35.63	36.24	36.04
2.01667	34.66	36.08	31.66	37.66	36	36.89	36.38	35.04	36.32	36.48	36.6	39.63	36.28	35.2	36.24	33.95	27.34	30.4	34.85	28.26	35.64				35.92	35.13	35.7	36.25	36.05
2.03333	34.51	36.07	31.68	37.58	35.95	36.91	36.41	35.28	36.34	36.47	36.58	39.56	36.29	35.29	36.41	33.96	27.38	30.57	34.91	28.27	35.64				35.93	35.12	35.73	36.25	36.05
2.05	34.27	36.03	31.73	37.73	35.91	36.9	36.39	35.3	36.34	36.48	36.54	39.55	36.43	35.38	36.46	33.98	27.42	30.61	34.95	28.3	35.68				35.93	35.12	35.74	36.17	36.06
2.06667	34.45	36.02	31.77	37.85	35.88	36.88	36.34	35.24	36.34	36.48	36.51	39.55	36.48	35.47	36.37	34.01	27.4	30.71	34.98	28.34	35.72				35.94	35.16	35.77	36.05	36.09
2.08333	34.64	36.03	31.81	38.04	35.85	36.88	36.3	35.31	36.32	36.47	36.49	39.55	36.49	35.7	36.26	34.02	27.32	30.77	35.06	28.38	35.63				35.95	35.16	35.8	36.05	36.09
2.1	34.71	36.05	32.01	38.17	35.82	36.94	36.25	35.44	36.29	36.45	36.53	39.56	36.49	35.81	36.2	34.1	27.35	30.8	35.15	28.4	35.59				35.94	35.17	35.94	36.09	36.09
2.11667	34.75	36.05	32.15	38.17	35.77	36.94	36.2	35.58	36.34	36.43	36.53	39.67	36.54	35.83	36.14	34.2	27.41	30.91	35.19	28.39	35.58				35.91	35.16	35.98	36.1	36.09
2.13333	34.75	36.03	32.24	38.37	35.76	36.88	36.14	35.77	36.37	36.42	36.5	39.92	36.62	35.81	36.11	34.27	27.49	30.92	35.27	28.41	35.56				35.91	35.14	35.9	36.15	36.08
2.15	34.73	36.02	32.34	38.45	35.73	36.85	36.17	35.81	36.38	36.4	36.47	40.04	36.63	35.92	36.04	34.28	27.56	31.02	35.33	28.41	35.55				35.92	35.08	35.83	36.21	36.06
2.16667	34.74	36.03		38.52	35.7	36.81	36.4	35.75	36.38	36.39	36.45	40.1	36.63	36.05	35.95	34.31	27.63	31.18	35.37	28.39	35.53				35.96	34.88	35.8	36.22	36.05
2.18333	34.75	36.03	32.53	38.54	35.65	36.8	36.52	35.7	36.38	36.4	36.44	40.15	36.64	36.05	35.89	34.35	27.63	31.18	35.4	28.36	35.51				35.98	34.72	35.84	36.24	36.05
2.2	34.76	36.03	32.82	38.48	35.6	36.89	36.4	35.64	36.38	36.4	36.44	40.19	36.64	36.06	35.8	34.36	27.58	31.21	35.45	28.5	35.48				35.99	34.65	35.99	36.29	36.02
2.21667	34.78	36.03	33.03	38.43	35.57	36.9	36.32	35.56	36.38	36.4	36.45	40.24	36.62	36.25	35.76	34.44	27.57	31.23	35.48	28.63	35.43				35.99	34.6	36.07	36.3	35.98
2.23333	34.85	36.07	33.19	38.42	35.56	36.81	36.28	35.73	36.26	36.37	36.46	40.29	36.59	36.27	35.76	34.65	27.6	31.24	35.53	28.63	35.41				35.99	34.64	36.1	36.3	35.96
2.25	34.9	36.18	33.33	38.44	35.69	36.55	36.25	35.97	35.97	36.35	36.46	40.29	36.54	36.29	35.73	34.68	27.65	31.25	35.55	28.67	35.38				35.98	34.82	36.11	36.31	35.95
2.26667	34.94	36.21	33.38	38.51	35.81	36.39	36.2	35.93	36.08	36.34	36.47	40.29	36.46	36.37	35.66	34.67	27.67	31.26	35.55	28.77	35.38				35.97	34.79	36.12	36.32	35.95
2.28333	34.97	36.21	33.38	38.57	35.82	36	36.14	35.95	36.32	36.31	36.46	40.22	36.42	36.37	35.6	34.65	27.66	31.28	35.54	28.86	35.38				35.99	34.73	36.13	36.32	35.95
2.3	35.04	36.21	33.44	38.6	35.82	35.94	36.14	36.06	36.45	36.31	36.45	40.19	36.38	36.42	35.6	34.61	27.69	31.35	35.52	29.05	35.38				35.99	34.73	36.13	36.29	35.95
2.31667	35.17	36.28	33.49	38.49	35.82	36.05	36.18	36.07	36.6	36.39	36.38	40.19	36.34	36.54	35.58	34.39	27.77	31.35	35.5	29.14	35.37				35.98	34.68	36.14	36.23	35.95
2.33333	35.21	36.35	33.5	38.3	35.82	36.24	36.21	36.01	36.61	36.44	36.32	40.21	36.34	36.75	35.55	34.26	27.89	31.34	35.48	29.2	35.34				35.97	34.79	36.13	36.21	35.95
2.35	35.27	36.5	33.6	38.3	35.82	36.49	36.24	35.98	36.29	36.53	36.32	40.25	36.4	36.87	35.5	34.24	28.06	31.36	35.47	29.36	35.31				35.97	35.09	36.11	36.24	35.93
2.36667	35.42	36.53	33.61	38.33	35.82	36.56	36.32	35.9	35.9	36.67	36.32	40.25	36.46	36.76	35.45	34.26	28.18	31.42	35.46	29.57	35.29				35.95	35.13	36.08	36.24	35.91
2.38333	35.65	36.54	33.64	38.35	35.82	36.67	36.38	35.81	36.13	36.88	36.31	40.25	36.62	36.14	35.48	34.29	28.36	31.58	35.46	29.63	35.29				35.94	35.1	36.07	36.24	35.91
2.4	35.68	36.61	33.69	38.38	35.83	36.66	36.39	35.86	36.31	36.94	36.27	40.25	36.65	35.8	35.48	34.34	28.47	31.56	35.46	29.67	35.29				36.05	34.89	35.98	36.22	35.91
2.41667	35.73	36.63	33.74	38.25	35.87	36.61	36.38	35.92	36.38	36.91	36.17	40.26	36.65	36.14	35.48	34.38	28.54	31.52	35.46	29.83	35.29				36.38	34.72	35.85	36.17	35.91
2.43333	35.87	36.59	33.91	38.06	35.99	36.61	36.38	35.95	36.44	36.91	36	40.34	36.65	36.22	35.46	34.4	28.59	31.5	35.45	30	35.29				36.46	34.72	35.89	36.13	35.91
2.45	35.9	36.51	34.16	37.99	35.99	36.58	36.33	35.96	36.44	36.96	35.94	40.4	36.64	36.3	35.44	34.4	28.71	31.43	35.45	30.04	35.28				36.48	34.76	35.93	36.09	35.91
2.46667	35.91	36.56	34.38	37.87	35.98	36.47	36.31	35.94	36.24	36.99	35.94	40.46	36.6	36.5	35.42	34.36	28.77	31.36	35.44	30.2	35.28				36.49	34.8	35.92	36.06	35.89
2.48333	35.97	36.62	34.41	37.89	35.95	36.39	36.28	35.92	36.05	36.95	35.93	40.54	36.6	36.53	35.4	34.4	29	31.32	35.4	30.24	35.27				36.49	35.04	35.89	36.03	35.85
2.5	36.08	36.61	34.34	38.01	35.95	36.43	36.22	36	35.97	36.79	35.98	40.6	36.66	36.53	35.39	34.87	29.24	31.28	35.39	30.22	35.26				36.47	35.22	35.85	36.01	35.82
2.51667	36.18	36.57	34.21	38.12	35.98	36.42	36.19	36.12	35.88	36.73	36.21	40.62	36.82	36.41	35.36	35.01	29.32	31.23	35.37	30.2	35.25				36.4	35.39	35.83	36	35.82
2.53333	36.22	36.52	34.2	38.43	36.1	36.44	36.17	36.1	35.77	36.58	36.37	40.65	36.9	36.18	35.3	35.05	29.45	31.27	35.36	30.47	35.23				36.41	35.41	35.81	35.99	35.81
2.55	36.1	36.65	34.22	38.59	36.32	36.51	36.17	35.84	35.8	36.6	36.45	40.68	36.96	35.92	35.2	35.07	29.62	31.25	35.34	30.62	35.2				36.39	35.25	35.8	35.98	35.81
2.56667	35.85	36.77	34.27	38.66	36.36	36.55	36.13	35.76	35.82	36.69	36.48	40.7	36.97	35.88	35.22	35.08	29.63	31.2	35.31	30.63	35.17				36.19	34.87	35.79	35.96	35.8
2.58333	36.05	36.84	34.32	38.7	36.32	36.53	36.1	35.85	35.86	36.62	36.48	40.71	36.96	36.04	35.23	35.07	29.66	31.21	35.28	30.65	35.16				36.07	34.49	35.76	35.95	35.77
2.6	36.23	36.91	34.4	38.74	36.33	36.45	36.07	36.07	35.87	36.45	36.47	40.7	36.94	35.99	35.23	34.96	29.95	31.15	35.38	30.73	35.15				36.09	34.4	35.71	35.94	35.72
2.61667	36.25	36.88	34.44	38.77	36.46	36.36	36.07	36.11	35.85	36.5	36.43	40.69	36.89	35.84	35.22	34.84	30.16	30.99	35.44	30.95	35.15				36.2	34.31	35.72	35.93	35.67
2.63333	36.26	36.8	34.46	38.82	36.59	36.29	36.28	35.99	35.86	36.62	36.44	40.68	36.84	35.74	35.21	34.84	30.29	31.04	35.47	31.03	35.15				36.52	34.34	35.74	35.92	35.72
2.65	36.34	36.76	34.53	38.83	36.57	36.24	36.47	35.62	35.95	36.64	36.45	40.68	36.79	35.86	35.17	34.84	30.43	31.18	35.48	31.08	35.13				36.62	34.43	35.73	35.9	35.78
2.66667	36.36	36.82	34.7	38.83	36.52	36.17	36.5	35.65	35.98	36.69	36.46	40.68	36.75	35.97	35.09	34.85	30.65	31.2	35.48	31.16	35.12				36.57	34.48	35.72	35.86	35.78
2.68333	36.05	36.93	34.75	38.82	36.6	36.14	36.52	35.74	36.09	36.72	36.45	40.68	36.79	35.98	35.16	34.98	30.72	31.28	35.47	31.27	35.12				36.43	34.58	35.7	35.83	35.81
2.7	35.59	36.93	34.75	38.78	36.71	36.1	36.53	35.79	36.17	36.88	36.42	40.63	36.81	35.96	35.35	35.25	30.78	31.39	35.46	31.39	35.11				36.41	34.66	35.68	35.8	35.85
2.71667	35.35	36.89	34.8	38.78	36.76	36.07	36.51	35.77	36.23	36.93	36.41	40.52	36.84	35.94	35.38	35.32	30.82	31.4	35.44	31.54	35.11				36.47	34.7	35.65	35.78	35.9
2.73333	35.28	36.86	34.88	38.8	36.77	36.04	36.45	35.67	36.26	37.02	36.46	40.57	36.84	36.4	35.38	35.33	30.85	31.38	35.42	31.61	35.12				36.57	34.73	35.62	35.75	36.06
2.75	35.41	36.89	35.05	38.81	36.75	35.99	36.39	35.76	36.29	37.09	36.49	40.48	36.84	36.48	35.39	35.33	30.86	31.34	35.41	31.69	35.17				36.66	34.74	35.6	35.71	36.23
2.76667	35.39	36.91	35.02	38.8	36.67	35.99	36.29	35.99	36.29	37.05	36.49	40.32	36.83	36.44	35.41	35.32	30.91	31.28	35.38	31.74	35.23				36.67	34.71	35.59	35.68	36.3
2.78333	35.18	36.99	34.95	38.78	36.64	36.06	36.3	36.12	36.3	37	36.38	40.23	36.78	36.36	35.41	35.31	31	31.26	35.37	31.78	35.28				36.69	34.63	35.61	35.67	36.31
2.8	35.15	37.03	34.98	38.78	36.51	36.08	36.31	36.08	36.35	37.06	36.27	40.16	36.73	36.23	35.4	35.3	31.1	31.2	35.38	32.03	35.32				36.72	34.57	35.82	35.68	36.29
2.81667	35.22	37.04	34.99	38.77	36.44	36.02	36.29	36.05	36.35	37.2	36.22	40.12	36.67	36.09	35.38	35.28	31.17	31.16	35.4	32.22	35.33				36.73	34.52	35.84	35.63	36.24
2.83333	35.28	37.02	35.03	38.77	36.42	35.98	36.25	35.98	36.35	37.31	36.22	40.16	36.63	36	35.35	35.25	31.27	31.2	35.41	32.33	35.34				36.77	34.45	36.04	35.61	36.19
2.85	35.33	36.97	35.23	38.76	36.41	36.11	36.13	35.86	36.34	37.31	36.2	40.52	36.59	35.97	35.32	35.22	31.4	31.34	35.44	32.42	35.37				36.92	34.43	36.14	35.66	36.14
2.86667	35.5	36.97	35.28	38.87	36.39	36.27	35.97	35.78	36.35	37.27	36.11	40.6	36.54	35.94	35.34	35.13	31.39	31.39	35.45	32.45	35.39				37	34.42	36.08	35.77	36.09
2.88333	35.61	37	35.29	38.94	36.35	36.31	35.83	35.8	36.35	37.21	36.06	40.54	36.52	35.84	35.4	35.1	31.38	31.39	35.46	32.44	35.39				37.01	34.4	35.99	35.82	36.05
2.9	35.62	36.99	35.31	38.98	36.27	36.28	35.79	36	36.38	37.16	36.11	40.35	36.46	35.71	35.42	35.1	31.38	31.41	35.47	32.4	35.4				36.98	34.39	35.98	35.82	36.03
2.91667	35.57	36.93	35.34	39.02	36.2	36.22	35.94	36.02	36.38	37.1	36.14	40.18	36.22	35.48	35.43	35.1	31.4	31.36	35.47	32.31	35.4				36.94	34.34	36	35.78	36
2.93333	35.52	36.79	35.34	39.07	36.12	36.18	35.99	36.04	36.38	37.03	36.26	40.11	36.06	35.45	35.43	35.1	31.47	31.29	35.45	32.32	35.41				36.9	34.29	35.99	35.84	35.99
2.95	35.46	36.75	35.33	39.08	36.05	36.06	36	36.08	36.36	36.9	36.34	40.28	36.13	35.53	35.42	35.1	31.68	31.27	35.5	32.38	35.44				36.84	34.24	35.95	35.85	35.98
2.96667	35.44	36.77	35.34	39.12	36	35.89	36	36.09	36.31	36.78	36.37	40.4	36.46	35.68	35.43	35.1	31.76	31.3	35.56	32.44	35.45				36.82	34.2	35.9	35.85	35.96
2.98333	35.46	36.82	35.36	39.17	35.97	35.89	36	36.26	36.36	36.68	36.35	40.23	36.55	35.78	35.48	35.09	31.76	31.43	35.58	32.52	35.46				36.82	34.18	35.86	35.97	35.96
3	35.5	36.92	35.39	39.15	36.05	35.89	36.08	36.42	36.42	36.61	36.31	40.12	36.6	35.8	35.52	35.08	31.66	31.52	35.59	32.58	35.45				36.78	34.18	35.83	36.04	35.96
3.01667	35.51	36.91	35.39	38.98	36.1	36.02	36.13	36.5	36.46	36.56	36.27	40.11	36.89	35.76	35.64	35.11	31.66	31.58	35.6	32.61	35.47				36.69	34.18	35.8	36.05	35.96
3.03333	35.52	36.8	35.38	38.69	36.21	36.07	36.17	36.56	36.55	36.52	36.21	40.11	36.97	35.71	35.74	35.1	31.98	31.64	35.6	32.64	35.52				36.59	34.2	35.77	36.06	35.96
3.05	35.56	36.75	35.38	38.64	36.23	36.06	36.21	36.56	36.58	36.5	36.15	40.12	36.95	35.71	35.86	35.06	32.1	31.69	35.59	32.69	35.63				36.55	34.25	35.7	36.05	35.95
3.06667	35.57	36.77	35.41	38.69	36.28	36.05	36.28	36.49	36.58	36.5	36.11	40.13	36.8	35.69	36.07	35.04	32.18	31.73	35.58	32.81	35.79				36.52	34.43	35.66	36.05	35.94
3.08333	35.64	36.83	35.47	38.71	36.37	36.04	36.29	36.53	36.58	36.5	36.08	40.13	36.62	35.46	36.21	35.01	32.3	31.76	35.53	33.2	35.83				36.47	34.57	35.62	36.09	35.93
3.1	35.69	36.83	35.47	38.72	36.38	36.04	36.26	36.6	36.58	36.5	36.06	40.12	36.5	35.42	36.31	35	32.35	31.75	35.49	33.34	35.93				36.43	34.59	35.61	36.09	35.91
3.11667	35.74	36.85	35.44	38.72	36.38	36.03	36.22	36.73	36.58	36.46	36.05	40.28	36.47	35.86	36.42	34.94	32.39	31.76	35.51	33.49	36.05				36.4	34.59	35.75	36.07	35.89
3.13333	35.77	36.85	35.42	38.68	36.37	36.03	36.14	36.83	36.55	36.42	36.08	40.3	36.54	35.96	36.56	34.91	32.38	31.84	35.5	33.6	36.08				36.35	34.63	35.92	36.04	35.86
3.15	35.78	36.74	35.4	38.62	36.35	36.02	36.09	36.85	36.52	36.36	36.05	40.28	36.66	35.93	36.69	34.91	32.31	31.92	35.47	33.67	36.41				36.31	34.66	35.94	36	35.82
3.16667	35.79	36.74	35.39	38.57	36.33	36.06	36.07	36.79	36.48	36.38	36.01	40.26	36.63	36.06	36.71	34.91	32.3	31.91	35.46	33.73	36.62				36.28	34.64	35.88	35.99	35.79
3.18333	35.78	36.69	35.34	38.52	36.3	36.02	36.04	36.63	36.37	36.4	36.02	40.27	36.59	36.22	36.73	34.9	32.35	31.96	35.46	33.76	36.75				36.24	34.59	35.89	36	35.79
3.2	35.75	36.59	35.29	38.52	36.27	35.8	36.05	36.65	36.31	36.41	36.1	40.29	36.61	36.27	36.73	34.8	32.43	32.04	35.46	33.77	36.83				36.21	34.58	35.98	35.98	35.78
3.21667	35.74	36.57	35.3	38.52	36.39	35.98	36.11	36.84	36.25	36.45	36.07	40.31	36.76	36.39	36.73	34.63	32.4	32.05	35.46	33.79	36.91				36.19	34.59	36.1	35.94	35.75
3.23333	35.74	36.61	35.29	38.54	36.45	36.07	36.2	36.91	36.2	36.49	36	40.32	36.8	36.42	36.89	34.54	32.43	32.07	35.47	33.79	36.99				36.16	34.59	36.16	35.91	35.73
3.25	35.74	36.62	35.28	38.53	36.59	36.06	36.22	36.81	36.15	36.51	35.87	40.32	36.8	36.44	36.89	34.61	32.46	32.16	35.47	33.81	37.06				36.14	34.59	36.17	35.86	35.7
3.26667	35.7	36.63	35.27	38.58	36.7	35.95	36.24	36.79	36.1	36.54	35.73	40.32	36.76	36.62	36.88	34.64	32.46	32.21	35.46	33.83	37.09				36.13	34.58	36.16	35.82	35.68
3.28333	35.67	36.63	35.27	38.66	36.75	35.89	36.27	37.02	36.13	36.57	35.61	40.32	36.75	36.74	36.92	34.64	32.48	32.22	35.43	33.83	37.15				36.13	34.55	36.13	35.77	35.66
3.3	35.67	36.6	35.28	38.67	36.83	35.91	36.29	37.04	36.21	36.6	35.57	40.31	36.72	36.78	36.97	34.58	32.53	32.19	35.49	33.87	37.18				36.13	34.51	36.1	35.7	35.64
3.31667	35.73	36.54	35.28	38.68	36.92	36.13	36.33	36.92	36.24	36.64	35.95	40.31	36.68	36.78	37.01	34.57	32.55	32.14	35.57	33.91	37.17				36.13	34.5	36.07	35.7	35.6
3.33333	36.01	36.5	35.3	38.69	36.96	36.36	36.35	36.96	36.18	36.65	36.04	40.31	36.59	36.79	37.03	34.63	32.59	31.99	35.62	33.94	37.15				36.1	34.49	36.03	35.73	35.57
3.35	36.34	36.5	35.39	38.68	36.96	36.48	36.39	36.96	36.01	36.65	36.14	40.31	36.53	36.77	37.02	34.63	32.65	31.82	35.66	33.96	37.14				36.09	34.47	35.98	35.75	35.52
3.36667	36.45	36.44	35.4	38.63	36.96	36.52	36.42	36.86	35.97	36.65	36.19	40.31	36.47	36.71	36.99	34.61	32.66	31.77	35.69	33.98	37.01				36.08	34.32	35.93	35.76	35.51
3.38333	36.46	36.38	35.4	38.58	36.96	36.51	36.44	36.9	36.05	36.61	36.36	40.31	36.42	36.57	36.99	34.57	32.66	31.7	35.69	34	36.85				36.05	34.26	35.88	35.76	35.51
3.4	36.47	36.31	35.49	38.58	36.97	36.44	36.44	37.02	36.02	36.55	36.53	40.31	36.4	36.42	36.99	34.51	32.69	31.6	35.69	34.03	36.87				36.03	34.27	35.84	35.75	35.5
3.41667	36.47	36.25	35.54	38.58	37	36.4	36.42	37.03	35.97	36.53	36.55	40.31	36.36	36.4	36.94	34.5	32.72	31.51	35.69	34.06	36.91				36.03	34.42	35.82	35.74	35.5
3.43333	36.46	36.34	35.63	38.33	37.03	36.35	36.4	37.02	36.14	36.51	36.58	40.31	36.34	36.49	36.9	34.45	32.76	31.49	35.72	34.08	36.91				36.03	34.45	35.81	35.73	35.5
3.45	36.49	36.51	35.71	38.1	37.08	36.3	36.4	37.03	36.22	36.46	36.65	40.31	36.33	36.51	36.86	34.39	32.84	31.5	35.76	34.11	36.77				36.03	34.46	35.82	35.71	35.49
3.46667	36.52	36.52	35.66	38.08	37.14	36.21	36.38	37.09	36.4	36.45	36.79	40.31	36.33	36.43	36.93	34.37	32.89	31.51	35.79	34.13	36.68				36.03	34.42	35.84	35.73	35.47
3.48333	36.52	36.51	35.42	38.18	37.19	36.13	36.39	37.07	36.69	36.45	36.77	40.31	36.33	36.52	36.94	34.2	33.01	31.55	35.82	34.17	36.64				36.03	34.18	35.89	35.73	35.47
3.5	36.5	36.5	35.35	38.23	37.25	36.09	36.39	37.12	36.71	36.45	36.61	40.31	36.33	36.59	36.96	34.06	33.02	31.6	35.83	34.18	36.61				36.01	34.07	35.89	35.7	35.47
3.51667	36.56	36.47	35.39	38.25	37.3	36.02	36.39	37.27	36.6	36.44	36.52	40.31	36.33	36.63	36.97	33.91	33.18	31.64	35.82	34.13	36.44				35.99	34.08	35.79	35.67	35.47
3.53333	36.61	36.45	35.39	38.29	37.32	35.96	36.38	37.26	36.38	36.41	36.54	40.3	36.31	36.62	36.97	33.86	33.23	31.68	35.79	33.92	36.33				35.98	34.14	35.72	35.65	35.47
3.55	36.63	36.41	35.38	38.46	37.39	35.9	36.34	37.13	36.24	36.38	36.55	40.3	36.28	36.61	37.04	33.96	33.2	31.73	35.7	33.85	36.28				35.95	34.18	35.74	35.62	35.47
3.56667	36.63	36.38	35.52	38.52	37.39	35.85	36.31	37.01	36.17	36.36	36.55	40.3	36.23	36.62	37.01	34	33.21	31.78	35.39	33.9	36.26				35.94	34.52	35.75	35.59	35.47
3.58333	36.67	36.3	35.92	38.54	37.37	35.84	36.3	36.91	36.1	36.36	36.54	40.3	36.18	36.6	36.73	34.06	33.26	31.83	35.28	33.87	36.19				35.94	34.7	35.96	35.56	35.49
3.6	36.7	36.11	35.94	38.47	37.35	35.84	36.32	36.92	36.19	36.35	36.51	40.3	36.23	36.52	36.39	34.11	33.41	31.88	35.43	33.9	36.08				35.94	34.89	35.99	35.55	35.56
3.61667	36.71	36.1	35.9	38.35	37.24	35.81	36.32	36.9	36.31	36.34	36.43	40.3	36.24	36.45	36.23	34.15	33.68	31.95	35.52	33.94	36.01				35.95	34.97	35.95	35.62	35.59
3.63333	36.7	36.1	35.92	38.32	37.12	35.8	36.31	36.89	36.38	36.32	36.38	40.31	36.24	36.45	36.19	34.14	33.75	32	35.62	33.98	35.98				35.98	35	35.94	35.7	35.57
3.65	36.66	36.24	35.96	38.29	37.11	35.79	36.26	36.83	36.42	36.31	36.36	40.31	36.26	36.46	36.25	34	33.77	32.06	35.74	34.02	35.91				35.99	35.02	35.94	35.76	35.55
3.66667	36.66	36.28	35.99	38.3	37.17	35.78	36.2	36.75	36.42	36.3	36.35	40.32	36.3	36.43	36.34	34.02	33.76	32.1	35.83	34.06	35.8				35.99	35.05	35.96	35.85	35.57
3.68333	36.66	36.23	36	38.39	37.2	35.79	36.14	36.66	36.41	36.3	36.44	40.33	36.32	36.3	36.48	34.08	33.81	32.14	36	34.1	35.68				35.99	35.06	35.95	35.86	35.6
3.7	36.66	36.24	36	38.42	37.25	35.77	36.1	36.49	36.37	36.29	36.45	40.33	36.42	36.22	36.6	34.15	33.92	32.18	36	34.2	35.64				35.99	35.04	35.88	35.89	35.64
3.71667	36.64	36.45	35.99	38.37	37.28	35.76	36.09	36.37	36.3	36.27	36.44	40.33	36.54	36.14	36.58	34.21	33.93	32.22	36	34.22	35.63				35.99	35	35.82	35.97	35.89
3.73333	36.62	36.59	35.98	38.24	37.32	35.78	36.07	36.32	36.26	36.26	36.43	40.33	36.58	36.06	36.5	34.32	33.88	32.27	36.11	34.16	35.61				35.99	34.97	35.75	36.06	36.04
3.75	36.7	36.59	36	38.27	37.33	35.75	36.02	36.36	36.2	36.25	36.48	40.32	36.58	35.98	36.71	34.39	33.78	32.31	36.16	34.08	35.7				35.99	35.04	35.67	36.11	36.1
3.76667	36.76	36.49	35.99	38.47	37.35	35.71	35.99	36.35	36.11	36.22	36.52	40.31	36.58	35.96	36.86	34.41	33.74	32.35	36.2	34.1	35.87				35.99	35.05	35.62	36.22	36.13
3.78333	36.77	36.53	35.98	38.54	37.39	35.68	35.98	36.3	36.08	36.2	36.5	40.31	36.56	35.99	36.92	34.43	33.74	32.37	36.18	34.25	35.94				35.93	35.04	35.52	36.23	36.19
3.8	36.76	36.54	36	38.55	37.39	35.61	35.97	36.18	36.08	36.18	36.46	40.31	36.49	36.03	36.93	34.58	33.74	32.42	36.19	34.3	35.94				35.94	35	35.47	36.24	36.21
3.81667	36.74	36.56	36	38.41	37.39	35.57	35.97	36.16	36.05	36.18	36.41	40.31	36.29	36.07	36.89	34.6	33.73	32.55	36.23	34.32	35.89				35.97	35	35.67	36.26	36.18
3.83333	36.69	36.72	36.01	38.41	37.45	35.55	35.96	36.26	36	36.2	36.42	40.32	36.23	36.12	36.74	34.6	33.92	32.67	36.2	34.37	35.83				35.95	35.07	35.82	36.24	36.16
3.85	36.68	36.7	36.03	38.76	37.49	35.53	35.94	36.38	35.99	36.21	36.49	40.32	36.19	36.16	36.6	34.58	34.02	32.69	36.1	34.37	35.78				35.89	35.12	35.85	36.23	36.28
3.86667	36.69	36.67	36.03	38.73	37.47	35.5	35.94	36.37	35.99	36.23	36.52	40.32	36.2	36.11	36.49	34.52	34.09	32.69	36.04	34.37	35.85				35.92	35.17	35.85	36.22	36.35
3.88333	36.72	36.68	36.04	38.62	37.5	35.45	35.94	36.24	35.99	36.23	36.52	40.32	36.26	36.13	36.42	34.5	34.14	32.75	36.02	34.37	35.91				36.07	35.24	35.84	36.23	36.36
3.9	36.76	36.82	36.03	38.56	37.57	35.7	35.96	36.07	35.98	36.23	36.52	40.31	36.29	36.3	36.37	34.47	34.13	32.71	36.03	34.38	35.86				36.13	35.27	35.84	36.22	36.36
3.91667	36.79	36.93	36.05	38.51	37.56	36.02	35.97	35.98	35.98	36.21	36.5	40.29	36.29	36.42	36.28	34.47	34.08	32.61	35.96	34.32	35.79				36.14	35.29	35.82	36.17	36.35
3.93333	36.8	36.9	36.1	38.43	37.53	35.96	36.12	36.01	35.99	36.22	36.47	40.25	36.29	36.4	36.24	34.9	34.13	32.66	35.98	34.14	35.8				36.11	35.31	35.81	36.12	36.34
3.95	36.82	36.8	36.01	38.5	37.52	36.04	36.25	36.03	35.98	36.3	36.44	40.15	36.28	36.47	36.29	35.26	34.21	32.67	35.98	34.1	35.83				36.11	35.32	35.82	36.1	36.32
3.96667	36.82	36.78	36.01	38.92	37.54	36.17	36.27	36.02	35.96	36.34	36.41	39.93	36.25	36.48	36.32	35.15	34.27	32.69	35.9	34.09	35.87				36.25	35.32	35.82	36.15	36.31
3.98333	36.79	36.77	36.3	39.05	37.53	35.97	36.21	35.98	35.95	36.34	36.39	39.71	36.24	36.27	36.29	35.02	34.33	32.71	35.87	34.14	35.96				36.2	35.23	35.79	36.21	36.3
4	36.56	36.78	36.75	38.65	37.46	35.9	36.23	35.93	35.93	36.34	36.35	39.82	36.22	36.22	36.21	34.95	34.38	32.71	35.75	34.23	35.97				36.13	35.1	35.79	36.26	36.26
4.01667	36.09	36.77	36.82	38.39	37.42	36.13	36.28	35.87	35.87	36.34	36.32	40.01	36.19	36.58	36.11	34.9	34.44	32.71	35.63	34.26	35.98				36.15	35.08	35.8	36.29	36.18
4.03333	36.03	36.73	36.74	38.37	37.36	36.56	36.3	35.85	35.84	36.34	36.32	40.09	36.15	36.62	36.14	34.88	34.5	32.71	35.54	34.3	35.99				36.11	35.09	35.8	36.33	36.11
4.05	36.06	36.85	36.46	38.35	37.25	36.65	36.22	35.79	35.8	36.33	36.34	40.17	36.1	36.27	36.13	34.87	34.55	32.72	35.56	34.34	36.06				36.27	35.08	35.82	36.32	36.05
4.06667	36.07	37.06	36.51	38.17	37.22	36.62	36.08	35.7	35.82	36.3	36.34	40.13	36.1	35.88	36.11	34.86	34.62	32.74	35.66	34.36	36.08				36.39	35.08	35.82	36.3	36.03
4.08333	36.09	37.03	36.43	38.08	37.18	36.57	36.23	35.6	35.85	36.28	36.3	40.05	36.1	35.69	36.08	34.86	34.67	32.75	35.71	34.38	36.05				36.39	35.08	35.82	36.28	36.01
4.1	36.1	36.82	36.4	38.23	37.1	36.52	36.25	35.48	35.88	36.28	36.25	40.08	36.09	35.57	36.03	34.78	34.71	32.77	35.74	34.42	36				36.38	35.01	35.81	36.24	35.95
4.11667	36.04	36.9	36.45	38.38	37.09	36.42	36.39	35.48	35.9	36.34	36.16	40.11	36.06	35.42	35.98	34.58	34.86	32.79	35.76	34.45	35.95				36.38	34.98	35.77	36.18	35.92
4.13333	35.92	36.97	36.48	38.48	37.17	36.34	36.49	35.55	35.92	36.35	36.11	40.21	36.02	35.33	35.93	34.53	34.89	32.81	35.79	34.45	35.92				36.38	34.96	35.73	36.08	35.89
4.15	35.89	36.98	36.48	38.49	37.2	36.26	36.58	35.64	35.87	36.35	36.09	40.23	35.97	35.23	35.91	34.51	34.88	32.83	35.81	34.47	35.89				36.37	34.93	35.73	35.99	35.85
4.16667	36.12	36.95	36.46	38.53	37.13	36.16	36.77	36.09	35.81	36.35	36.06	40.19	35.94	35.11	35.88	34.5	34.85	32.85	35.82	34.52	35.87				36.35	34.89	35.71	35.93	35.82
4.18333	36.09	36.93	36.46	38.56	37	36.08	36.83	36.29	35.76	36.35	36.01	40.21	35.92	35.01	35.84	34.45	34.85	32.87	35.84	34.54	35.85				36.33	34.88	35.66	35.9	35.79
4.2	35.89	36.88	36.49	38.64	36.98	36	36.91	36.32	35.74	36.32	35.96	40.27	35.92	34.92	35.81	34.41	34.94	32.89	35.85	34.57	35.76				36.26	34.88	35.64	35.88	35.77
4.21667	35.75	36.78	36.51	38.73	36.98	35.92	36.95	36.31	35.71	36.28	35.94	40.28	35.91	34.89	35.76	34.41	35	32.92	35.85	34.59	35.7				36.25	34.88	35.58	35.87	35.74
4.23333	35.66	36.75	36.51	38.77	37.05	35.88	36.89	35.96	35.65	36.23	35.95	40.19	35.91	34.84	35.67	34.42	35.03	32.96	35.86	34.61	35.69				36.24	34.89	35.66	35.88	35.73
4.25	35.75	36.71	36.52	38.78	37.04	35.84	36.88	35.74	35.67	36.2	35.94	39.96	35.86	34.79	35.56	34.41	34.9	33	35.86	34.63	35.69				36.18	34.88	35.85	35.88	35.74
4.26667	35.86	36.7	36.51	38.81	37.04	35.82	37.09	35.84	35.78	36.19	35.91	39.71	35.83	34.72	35.48	34.38	34.68	33.03	35.86	34.66	35.69				36.07	34.86	35.94	35.86	35.72
4.28333	35.9	36.68	36.48	38.84	37.1	35.81	37.21	35.88	35.82	36.18	35.9	39.55	35.81	34.67	35.45	34.31	34.62	33.06	35.85	34.66	35.67				36.05	34.83	35.96	35.83	35.69
4.3	35.93	36.68	36.47	38.86	37.18	35.8	37.22	36.05	35.83	36.18	35.91	39.52	35.81	34.66	35.41	34.26	34.63	33.09	35.86	34.64	35.66				36.09	34.82	35.98	35.75	35.68
4.31667	35.96	36.7	36.47	38.91	37.22	35.79	37.27	36.08	35.82	36.18	35.92	39.61	35.81	34.65	35.35	34.21	34.7	33.11	35.86	34.65	35.64				36.12	34.79	35.99	35.62	35.66
4.33333	35.97	36.7	36.54	38.94	37.23	35.8	37.34	36.06	35.81	36.18	35.92	39.6	35.81	34.65	35.29	34.15	34.74	33.13	35.87	34.65	35.66				36.15	34.75	35.98	35.58	35.66
4.35	35.96	36.69	36.56	38.97	37.24	35.8	37.38	35.98	35.8	36.17	35.94	39.51	35.83	34.68	35.31	34.08	34.79	33.15	35.88	34.62	35.7				36.15	34.71	35.97	35.59	35.66
4.36667	35.93	36.65	36.55	39.03	37.24	35.79	37.41	35.73	35.82	36.16	35.97	39.5	35.86	34.67	35.37	34.02	34.82	33.16	35.88	34.6	35.73				36.15	34.56	35.96	35.56	35.65
4.38333	35.93	36.6	36.5	39.03	37.23	35.78	37.37	35.41	35.86	36.14	36.09	39.47	35.89	34.63	35.38	33.98	34.85	33.18	35.9	34.6	35.74				36.15	34.49	35.93	35.52	35.63
4.4	35.93	36.57	36.5	39.03	37.16	35.77	37.38	35.52	35.88	36.12	36.07	39.47	35.89	34.6	35.43	33.94	34.88	33.21	35.91	34.62	35.72				36.15	34.55	35.87	35.51	35.62
4.41667	35.94	36.54	36.64	39.03	37.1	35.78	37.39	35.59	35.86	36.11	36.07	39.54	35.89	34.58	35.51	33.91	34.95	33.22	35.9	34.63	35.72				36.15	34.47	35.84	35.5	35.61
4.43333	35.93	36.52	36.65	39.03	37.07	35.78	37.37	35.76	35.67	36.1	36.09	39.71	35.89	34.66	35.53	33.88	35.03	33.23	35.88	34.64	35.77				36.17	34.43	35.8	35.48	35.6
4.45	35.91	36.5	36.64	39.04	37.03	35.78	37.16	36.16	35.56	36.09	36.13	39.75	35.9	34.69	35.54	33.85	35.01	33.26	35.86	34.65	35.85				36.23	34.43	35.75	35.46	35.6
4.46667	35.91	36.49	36.64	39.04	37	35.8	36.91	36.38	35.51	36.09	36.17	39.74	35.91	34.66	35.54	33.82	35	33.28	35.85	34.66	35.85				36.25	34.46	35.65	35.44	35.6
4.48333	35.88	36.47	36.64	39.08	36.91	35.79	37.15	36.46	35.49	36.07	36.27	39.66	35.7	34.56	35.53	33.88	35	33.3	35.85	34.71	35.83				36.24	34.52	35.64	35.42	35.6
4.5	35.87	36.46	36.67	39.23	36.91	35.76	37.26	36.45	35.4	36.05	36.25	39.61	35.52	34.49	35.52	33.98	35	33.31	35.85	34.74	35.79				36.21	34.54	35.57	35.4	35.6
4.51667	35.91	36.46	36.66	39.43	37.04	35.73	37.24	36.35	35.45	36	36.09	39.61	35.57	34.3	35.5	34.03	35.03	33.31	35.87	34.74	35.75				36.19	34.55	35.49	35.35	35.6
4.53333	35.9	36.47	36.6	39.55	37.15	35.69	37.15	36.27	35.77	35.98	36.04	39.61	35.92	34.25	35.49	34.05	35.05	33.31	35.89	34.74	35.71				36.19	34.55	35.51	35.34	35.6
4.55	35.78	36.46	36.6	39.6	37.19	35.64	37.11	36.43	35.71	35.98	36	39.58	36.12	34.27	35.49	34.06	35.07	33.33	35.94	34.79	35.65				36.19	34.55	35.56	35.35	35.6
4.56667	35.75	36.44	36.61	39.55	37.17	35.6	37.13	36.61	35.68	35.98	35.96	39.51	36.29	34.24	35.49	34.08	35.09	33.35	35.95	34.68	35.64				36.19	34.51	35.59	35.35	35.6
4.58333	35.75	36.42	36.6	39.2	37.13	35.56	37.29	36.57	35.74	36.03	36	39.45	36.39	34.21	35.49	34.08	35.11	33.36	35.94	34.59	35.64				36.19	34.47	35.59	35.33	35.56
4.6	35.75	36.4	36.58	38.96	37.12	35.54	37.3	36.5	35.77	36.05	36.01	39.43	36.39	34.17	35.47	34.06	35.13	33.37	35.92	34.43	35.69				36.14	34.43	35.47	35.32	35.55
4.61667	35.75	36.38	36.62	38.95	37.11	35.53	37.17	36.36	35.78	36.05	35.99	39.42	36.47	34.12	35.45	34.06	35.18	33.38	35.92	34.46	35.72				36.1	34.39	35.41	35.36	35.53
4.63333	35.72	36.36	36.62	39.03	37.1	35.5	36.85	36.35	35.83	36.05	35.97	39.42	36.61	34.12	35.49	34.18	35.22	33.41	35.92	34.73	35.72				36.09	34.36	35.43	35.49	35.57
4.65	35.67	36.38	36.59	39.12	37.1	35.49	36.87	36.51	35.85	36.03	35.95	39.43	36.68	34.16	35.64	34.52	35.25	33.44	35.92	35.03	35.72				36.06	34.32	35.42	35.5	35.63
4.66667	35.68	36.4	36.6	39.19	37.1	35.51	36.96	36.58	35.86	36.01	35.99	39.43	36.74	34.14	35.68	34.74	35.27	33.45	35.94	35.09	35.74				36.03	34.31	35.38	35.5	35.65
4.68333	35.73	36.27	36.62	39.22	37.11	35.52	36.89	36.51	35.94	36.02	36.03	39.42	36.83	34.06	35.69	34.85	35.27	33.47	35.93	35.04	35.85				36	34.3	35.37	35.57	35.68
4.7	35.76	36.19	36.61	39.22	37.12	35.58	36.77	36.5	35.96	35.99	36.02	39.41	36.85	33.98	35.69	34.92	35.27	33.49	35.92	35.04	35.89				35.98	34.3	35.44	35.8	35.75
4.71667	35.79	36.2	36.65	39.22	37.17	35.63	36.76	36.56	35.95	35.91	35.91	39.41	36.75	33.88	35.68	34.95	35.25	33.5	35.92	35.12	35.88				35.94	34.3	35.46	36.07	35.81
4.73333	35.86	36.26	36.66	39.19	37.18	35.65	36.82	36.55	35.93	35.87	35.66	39.41	36.73	33.78	35.66	34.77	35.24	33.5	35.94	35.12	35.83				35.93	34.3	35.5	36.3	35.86
4.75	35.85	36.38	36.66	39.15	37.23	35.68	36.86	36.45	35.89	35.83	35.45	39.4	36.85	33.7	35.62	34.48	35.24	33.51	35.95	35.11	35.84				35.98	34.3	35.57	36.44	35.9
4.76667	35.75	36.48	36.66	39.12	37.29	35.7	36.86	36.29	35.89	35.81	35.59	39.41	36.9	33.64	35.58	34.4	35.26	33.52	35.96	35.11	35.87				36.16	34.3	35.58	36.52	35.91
4.78333	35.56	36.58	36.67	39.12	37.38	35.7	36.84	36.23	35.89	35.79	35.77	39.81	36.84	33.59	35.55	34.33	35.28	33.53	35.95	35.12	35.86				36.26	34.29	35.62	36.54	35.91
4.8	35.59	36.62	36.66	39.11	37.38	35.69	36.78	36.21	35.9	35.75	35.76	39.93	36.79	33.52	35.54	34.35	35.28	33.55	35.95	35.15	35.84				36.39	34.28	35.67	36.6	35.89
4.81667	35.63	36.63	36.64	39.11	37.39	35.65	36.78	36.01	35.9	35.72	35.77	39.94	36.72	33.45	35.53	34.74	35.22	33.55	35.95	35.2	35.85				36.5	34.27	35.68	36.7	35.84
4.83333	35.64	36.62	36.64	39.1	37.39	35.58	36.75	35.89	35.89	35.74	35.88	39.91	36.71	33.38	35.51	34.92	35.17	33.55	35.94	35.24	35.86				36.55	34.2	35.7	36.79	35.78
4.85	35.63	36.6	36.64	39.07	37.33	35.54	36.68	35.84	35.84	35.77	35.92	39.7	36.72	33.32	35.49	34.97	35.19	33.57	35.92	35.13	35.84				36.57	34.17	35.66	36.86	35.68
4.86667	35.65	36.61	36.38	39.06	37.31	35.53	36.61	35.85	35.77	35.8	35.98	39.5	36.73	33.25	35.49	34.97	35.23	33.59	35.92	34.79	35.83				36.58	34.48	35.52	36.88	35.58
4.88333	35.7	36.61	36.21	39.1	37.36	35.53	36.55	35.84	35.73	35.81	35.99	39.35	36.86	33.18	35.52	34.96	35.3	33.63	35.91	34.76	35.83				36.58	34.6	35.46	36.76	35.51
4.9	35.69	36.6	36.25	39.14	37.38	35.5	36.49	35.75	35.8	35.82	36.01	39.26	36.7	33.13	35.51	34.96	35.36	33.65	35.9	34.83	35.83				36.58	34.59	35.56	36.61	35.5
4.91667	35.6	36.57	36.29	39.21	37.38	35.53	36.41	35.61	35.83	35.81	36.09	39.24	36.52	33.08	35.49	35	35.52	33.68	35.91	35.04	35.84				36.58	34.59	35.69	36.65	35.48
4.93333	35.63	36.54	36.19	39.24	37.38	35.62	36.35	35.52	35.84	35.82	36.14	39.24	36.42	33.05	35.47	34.92	35.53	33.69	35.9	35.12	35.83				36.58	34.59	35.72	36.8	35.44
4.95	35.74	36.53	36.13	39.26	37.36	35.71	36.29	35.5	35.84	35.82	36.15	39.24	36.46	33.13	35.44	34.83	35.66	33.75	35.89	34.99	35.51				36.59	34.59	35.72	36.84	35.42
4.96667	35.79	36.52	36.14	39.29	37.37	35.87	36.26	35.52	35.84	35.83	36.13	39.24	36.44	33.28	35.41	34.9	35.67	33.78	35.84	34.78	35.28				36.6	34.62	35.73	36.9	35.39
4.98333	35.78	36.51	36.29	39.3	37.5	36.15	36.18	35.5	35.81	35.85	36.12	39.27	36.35	33.31	35.4	34.99	35.69	33.8	35.82	34.75	35.21				36.6	34.65	35.79	36.89	35.38
5	35.76	36.49	36.36	39.3	37.64	36.24	36.1	35.44	35.78	35.85	36.14	39.28	36.32	33.43	35.39	35.11	35.77	33.82	35.8	35.01	35.26				36.58	34.65	35.8	36.78	35.38
5.01667	35.71	36.45	36.35	39.3	37.65	36.21	36.02	35.43	35.76	35.85	36.16	39.28	36.34	34.02	35.43	35.13	35.84	33.84	35.78	35.02	35.45				36.55	34.65	35.77	36.74	35.39
5.03333	35.64	36.38	36.24	39.3	37.62	36.19	35.94	35.44	35.74	35.85	36.18	39.28	36.32	34.39	35.43	35.12	35.88	33.85	35.78	34.99	35.48				36.52	34.63	35.73	36.74	35.41
5.05	35.72	36.35	36.23	39.32	37.63	36.2	35.84	35.49	35.72	35.88	36.19	39.24	36.12	34.91	35.43	35.12	35.91	33.86	35.78	35.7	35.41				36.47	34.63	35.73	36.77	35.42
5.06667	35.79	36.32	36.32	39.34	37.63	36.23	35.76	35.52	35.7	35.95	36.2	39.23	36.08	35.08	35.42	35.15	35.97	33.87	35.78	35.76	35.44				36.42	34.63	35.72	36.92	35.41
5.08333	35.86	36.33	36.38	39.35	37.62	36.23	35.68	35.51	35.71	35.92	36.2	39.2	36.47	35.18	35.42	35.18	36.01	33.88	35.76	35.21	35.51				36.39	34.6	35.69	37.06	35.38
5.1	36.36	36.35	36.77	39.35	37.6	36.21	35.63	35.5	35.73	35.85	36.2	39.19	36.76	35.3	35.4	35.21	36.06	33.89	35.73	35.02	35.53				36.35	34.6	35.59	37.11	35.37
5.11667	36.65	36.36	36.81	39.35	37.58	36.18	35.58	35.5	35.61	35.82	36.2	39.17	36.81	35.35	35.4	35.2	36.17	33.95	35.71	35.39	35.53				36.34	34.56	35.56	37.11	35.35
5.13333	36.95	36.37	36.81	39.35	37.51	36.1	35.53	35.45	35.7	35.67	36.21	39.13	36.81	35.32	35.42	35.09	36.24	34.05	35.75	35.42	35.52				36.3	34.54	35.58	37.09	35.34
5.15	37.03	36.49	36.8	39.35	37.47	36.03	35.47	35.39	36.07	35.48	36.24	39.17	36.81	35.26	35.44	35.1	36.29	34.01	35.79	34.96	35.52				36.3	34.54	35.62	37.05	35.34
5.16667	36.95	36.49	36.87	39.32	37.49	35.94	35.43	35.35	36.25	35.26	36.3	39.18	36.77	35.21	35.44	35.2	36.34	33.91	35.81	34.8	35.51				36.3	34.52	35.63	36.99	35.32
5.18333	36.88	36.47	36.94	39.26	37.56	35.86	35.41	35.33	36.27	35.2	36.25	39.18	36.71	35.13	35.44	35.26	36.33	33.81	35.82	34.67	35.51				36.3	34.52	35.64	36.92	35.31
5.2	36.7	36.43	37	39.09	37.57	35.8	35.46	35.33	36.25	35.23	36.09	39.18	36.63	35.05	35.44	35.28	36.31	33.67	35.82	34.87	35.47				36.3	34.55	35.65	36.85	35.31
5.21667	36.63	36.31	37.03	38.81	37.52	35.75	35.5	35.35	36.22	35.31	36	39.17	36.56	34.97	35.43	35.27	36.28	33.65	35.83	35.77	35.43				36.29	34.55	35.65	36.79	35.31
5.23333	36.57	36.23	37.05	38.71	37.5	35.72	35.51	35.35	36.19	35.38	35.99	39.13	36.47	34.9	35.42	35.14	36.28	33.7	35.86	36.12	35.39				36.28	34.53	35.66	36.76	35.31
5.25	36.56	36.16	37.08	38.77	37.47	35.65	35.51	35.29	36.19	35.58	36.04	39.08	36.39	34.82	35.39	35.06	36.27	33.8	35.88	36.21	35.38				36.25	34.49	35.66	36.74	35.31
5.26667	36.52	36.13	37.06	38.77	37.44	35.6	35.5	35.44	36.19	35.81	36.05	39.05	36.33	34.72	35.35	35.21	36.26	33.84	35.89	36.23	35.38				36.23	34.46	35.67	36.69	35.31
5.28333	36.3	36.09	37.09	38.73	37.43	35.57	35.48	35.68	36.18	35.9	36.05	38.98	36.3	34.65	35.33	35.25	36.24	33.88	35.9	36.2	35.37				36.17	34.45	35.68	36.64	35.31
5.3	36.1	36.1	37.24	38.68	37.43	35.54	35.43	35.8	36.15	35.91	36.05	38.88	36.25	34.58	35.3	35.29	36.23	33.88	35.9	35.92	35.37				35.99	34.45	35.67	36.61	35.31
5.31667	36.45	36.13	37.2	38.68	37.51	35.51	35.44	35.79	36.13	35.9	36.09	38.78	36.2	34.56	35.28	35.28	36.23	33.86	35.88	35.96	35.34				35.95	34.45	35.58	36.61	35.32
5.33333	36.56	36.15	37.12	38.68	37.51	35.54	35.47	35.76	36.14	35.84	36.07	38.7	36.15	34.53	35.27	35.22	36.21	33.89	35.87	36.06	35.26				35.9	34.44	35.5	36.59	35.33
5.35	36.68	36.21	37.2	38.65	37.49	35.59	35.47	35.69	36.14	35.78	36.04	38.68	36.11	34.5	35.27	35.15	36.17	33.91	35.87	36.07	35.11				35.82	34.45	35.53	36.59	35.33
5.36667	36.68	36.3	37.18	38.65	37.51	35.61	35.47	35.6	36.14	35.71	36.04	38.67	36.07	34.49	35.27	34.99	36.1	33.91	35.83	35.95	35.08				35.79	34.47	35.7	36.59	35.33
5.38333	36.65	36.23	37.07	38.65	37.52	35.59	35.49	35.53	36.14	35.65	36.01	38.65	36.04	34.48	35.3	34.81	36.01	33.9	35.72	35.9	35.09				35.76	34.48	35.77	36.56	35.33
5.4	37.11	36.29	36.99	38.68	37.52	35.5	35.54	35.51	36.14	35.6	35.99	38.63	36.02	34.47	35.37	34.78	35.95	33.9	35.72	35.9	35.11				35.76	34.48	35.78	36.58	35.32
5.41667	37.15	36.61	36.97	38.77	37.54	35.47	35.62	35.48	36.14	35.54	35.99	38.63	35.99	34.47	35.42	34.76	35.94	33.91	35.71	35.89	35.26				35.83	34.48	35.78	36.6	35.31
5.43333	37.17	36.81	37.17	38.78	37.55	35.55	35.64	35.43	36.14	35.51	36.11	38.61	35.97	34.56	35.42	34.77	35.92	33.94	35.71	35.9	35.54				35.96	34.48	35.74	36.59	35.3
5.45	37.18	36.79	37.24	38.78	37.56	35.76	35.64	35.39	36.14	35.52	36.16	38.59	35.95	34.55	35.46	34.96	35.91	33.97	35.71	35.91	35.61				36.11	34.47	35.7	36.59	35.3
5.46667	37.18	36.55	37.2	38.78	37.56	35.79	35.62	35.3	36.12	35.54	36.19	38.56	35.96	34.49	35.51	35.37	35.89	33.99	35.71	35.91	35.63				36.4	34.45	35.71	36.59	35.3
5.48333	37.16	36.5	37.19	38.78	37.57	35.83	35.64	35.19	36.08	35.57	36.22	38.56	35.99	34.45	35.53	35.53	35.88	34.01	35.7	35.89	35.63				36.45	34.43	35.77	36.56	35.29
5.5	37.14	36.57	37.15	38.76	37.54	35.97	35.68	35.16	35.95	35.6	36.29	38.56	36.02	34.43	35.55	35.57	35.9	34.04	35.71	35.88	35.63				36.44	34.4	35.82	36.52	35.28
5.51667	37.13	36.63	37.08	38.69	37.43	36.09	35.68	35.12	35.36	35.63	36.34	38.56	36.04	34.39	35.65	35.57	35.92	34.03	35.74	35.91	35.61				36.3	34.39	35.73	36.51	35.28
5.53333	37.08	36.69	37.05	38.64	37.34	36.3	35.66	35.12	35.24	35.65	36.32	38.56	36.05	34.33	35.68	35.56	35.92	33.99	35.79	35.91	35.6				36.36	34.39	35.63	36.51	35.28
5.55	37	36.67	37.02	38.64	37.31	36.28	35.65	35.13	35.27	35.66	36.19	38.55	36.08	34.29	35.63	35.63	35.92	33.99	35.83	35.9	35.61				36.46	34.35	35.57	36.48	35.28
5.56667	36.95	36.67	36.99	38.67	37.2	35.94	35.66	35.09	35.27	35.67	35.9	38.54	36.09	34.28	35.61	35.66	35.92	33.99	35.85	35.89	35.63				36.48	34.3	35.4	36.45	35.28
5.58333	36.94	36.8	36.99	38.7	37.16	35.75	35.66	35	35.27	35.67	35.64	38.56	36.09	34.27	35.63	35.68	35.93	34.01	35.86	35.94	35.62				36.47	34.37	35.29	36.49	35.3
5.6	36.93	36.91	36.98	38.72	37.11	35.99	35.58	35.23	35.31	35.66	35.48	38.61	36.08	34.33	35.7	35.71	35.95	34.04	35.87	35.95	35.59				36.44	34.45	35.25	36.51	35.32
5.61667	36.92	37	36.93	38.75	37.13	36.42	35.55	35.25	35.46	35.64	35.54	38.56	36.05	34.42	35.71	35.74	35.94	34.05	35.89	35.95	35.52				36.36	34.38	35.43	36.51	35.33
5.63333	36.92	37.09	36.87	38.88	37.13	36.63	35.55	35.17	35.47	35.64	35.99	38.42	36.03	34.44	35.69	35.74	35.91	34.1	35.92	35.96	35.55				36.34	34.19	35.75	36.51	35.34
5.65	36.88	37.19	36.87	38.98	37.11	36.68	35.52	35.24	35.41	35.62	36.06	38.51	36.04	34.46	35.66	35.74	35.87	34.15	35.94	35.97	35.58				36.33	34.07	35.81	36.51	35.34
5.66667	36.82	37.22	36.92	39.02	37.12	36.73	35.52	35.32	35.71	35.6	36.08	38.76	36.09	34.45	35.72	35.75	35.86	34.16	35.97	36.01	35.61				36.3	33.98	35.81	36.51	35.34
5.68333	36.83	37.19	37.06	39.03	37.13	36.77	35.51	35.38	36.13	35.56	36.11	38.78	36.09	34.42	35.75	35.77	35.86	34.17	36.01	36.02	35.61				36.23	33.92	35.78	36.51	35.34
5.7	36.86	37.13	37.07	39.03	37.13	36.84	35.6	35.34	35.94	35.49	36.58	38.73	36.08	34.42	35.77	35.72	35.87	34.19	36.03	36.04	35.6				36.13	33.89	35.75	36.51	35.34
5.71667	36.86	37.13	37.04	39.04	37.13	36.98	35.6	35.45	35.7	35.35	36.78	38.79	36.05	34.43	35.81	35.53	35.86	34.21	36.03	36.06	35.58				36.04	33.86	35.71	36.51	35.34
5.73333	36.84	37.32	36.98	39.1	37.1	37.18	35.58	35.75	35.65	35.34	36.92	38.95	36.01	34.43	35.83	35.45	35.87	34.23	36.09	36.08	35.55				35.94	34.01	35.75	36.53	35.33
5.75	36.86	37.38	36.97	39.15	37.03	37.23	35.54	35.91	35.69	35.51	37.01	38.99	35.95	34.41	35.85	35.4	35.95	34.24	36.11	36.1	35.47				35.86	34.03	35.81	36.56	35.32
5.76667	36.86	37.35	36.98	39.22	37	37.25	35.54	36.07	35.82	35.64	37.04	39.04	35.91	34.37	35.91	35.36	35.95	34.26	36.11	36.12	35.46				35.85	34	35.8	36.66	35.32
5.78333	36.82	37.24	36.97	39.25	36.95	37.26	35.71	36.33	35.88	35.67	37.03	39.15	35.88	34.33	35.92	35.33	35.93	34.26	36.06	36.14	35.46				35.85	33.95	35.75	36.67	35.29
5.8	36.79	37.1	36.97	39.26	36.91	37.27	35.7	36.41	36.05	35.68	36.98	39.19	35.84	34.27	35.94	35.32	35.9	34.25	36.02	36.15	35.47				35.85	33.92	35.7	36.63	35.29
5.81667	36.81	36.83	36.96	39.27	36.87	37.27	35.64	36.5	36	35.68	36.97	39.19	35.81	34.2	35.95	35.34	35.86	34.24	36.01	36.15	35.49				35.85	33.92	35.72	36.54	35.29
5.83333	36.84	36.81	37.05	39.27	36.87	37.25	35.63	36.59	35.67	35.67	36.95	39.17	35.77	34.22	35.98	35.34	35.82	34.24	36	36.15	35.49				35.85	33.97	35.73	36.5	35.28
5.85	36.87	36.78	37.51	39.27	36.87	37.35	35.63	36.65	35.32	35.66	36.91	39.12	35.74	34.25	36.07	35.36	35.76	34.25	36.02	36.15	35.49				35.84	34.04	35.71	36.5	35.26
5.86667	36.87	36.78	37.84	39.27	36.94	37.38	35.65	36.74	35.33	35.66	36.9	38.93	35.74	34.25	36.15	35.32	35.69	34.27	36.06	36.14	35.51				35.83	34.08	35.71	36.49	35.24
5.88333	36.87	36.77	37.93	39.22	37.01	37.33	35.7	36.79	35.54	35.66	36.86	38.77	35.74	34.21	36.24	34.86	35.67	34.29	36.11	36.11	35.54				35.81	34.12	35.69	36.47	35.24
5.9	36.88	36.76	37.91	39.02	37.04	37.12	35.77	36.78	35.68	35.65	36.84	38.67	35.8	34.16	36.23	34.63	35.69	34.37	36.12	36.15	35.54				35.79	34.01	35.76	36.44	35.24
5.91667	36.9	36.73	37.64	38.96	37.08	37.09	35.79	36.71	35.72	35.64	36.82	38.6	35.84	34.15	36.13	34.58	35.69	34.42	36.07	36.17	35.54				35.75	33.96	35.88	36.41	35.24
5.93333	36.88	36.76	37.5	38.87	37.09	36.82	35.81	36.67	35.76	35.62	36.81	38.55	35.84	34.14	36.06	34.51	35.68	34.48	36.04	36.18	35.54				35.71	34	35.9	36.39	35.21
5.95	36.8	36.76	37.51	38.84	37.09	36.68	35.81	36.67	35.83	35.62	36.76	38.53	35.84	34.14	36.03	34.55	35.69	34.51	35.98	36.18	35.54				35.73	34.06	35.8	36.35	35.2
5.96667	36.75	36.75	37.48	38.8	37.11	36.65	35.79	36.58	35.91	35.62	36.73	38.52	35.84	34.15	35.99	34.69	35.69	34.53	35.94	36.18	35.52				35.77	34.13	35.76	36.28	35.2
5.98333	36.68	36.71	37.44	38.83	37.14	36.49	35.78	36.38	36.25	35.62	36.69	38.49	35.84	34.14	35.96	34.98	35.69	34.55	35.96	36.17	35.49				35.96	34.12	35.7	36.26	35.2
6	36.55	36.66	37.44	38.82	37.16	36.12	35.75	36.26	36.45	35.61	36.64	38.44	35.84	34.14	35.91	34.98	35.68	34.58	35.93	36.15	35.46				36.1	34.16	35.55	36.27	35.2

## Sheet: Tg(Myh11-CreERT2) AMG517
Time	Tg(Myh11-CreERT2)-AMG						Tg(Myh11-CreERT2)-Veh						Tg(Myh11-CreERT2);Trpv1fl/fl-AMG						Tg(Myh11-CreERT2);Trpv1fl/fl-Veh
	S161	T751	U288	U893	U894	U896	S161	T751	U288	U893	U894	U896	S164	S166	T502	T506	T896		S164	S166	T502	T506	T896
-1	35.06	37.8133	35.9967	36	36.3233	34.9267	35.3567	38.1933	35.89	35.3667	35.6433	34.66	35.4067	36.1467	34.9233	35.7533			35.3333	35.61	35.3567	36.2833
-0.983333	35.0933	37.8067	36.0867	36.0367	36.2967	34.9367	35.2167	38.1667	35.8633	35.39	35.5933	34.69	35.4	36.17	34.9933	35.7267			35.3367	35.62	35.3567	36.2333
-0.966667	35.17	37.81	36.13	36.16	36.2433	34.9767	35.2267	38.17	35.8633	35.3367	35.5367	34.7467	35.3967	36.16	35.0567	35.7067			35.32	35.6267	35.3633	36.23
-0.95	35.26	37.8033	36.15	36.19	36.2	35.0167	35.26	38.24	35.89	35.35	35.46	34.8	35.3867	36.1433	35.0367	35.6567			35.3633	35.5933	35.3267	36.23
-0.933333	35.3633	37.8033	36.1467	36.2	36.1833	35.1433	35.2933	38.2933	35.92	35.4	35.4333	34.8167	35.3733	36.06	34.9667	35.6333			35.5067	35.56	35.32	36.2133
-0.916667	35.4533	37.81	36.1433	36.2067	36.1533	35.2867	35.29	38.3067	35.9733	35.4133	35.4367	34.7567	35.36	36.0233	34.79	35.62			35.5567	35.5333	35.34	36.1867
-0.9	35.4867	37.83	36.1467	36.19	36.0967	35.3033	35.2933	38.3167	35.9867	35.59	35.41	34.68	35.3533	35.9833	34.7433	35.6067			35.5733	35.5067	35.3433	36.1667
-0.883333	35.54	37.81	36.1367	36.0467	36.1067	35.2833	35.3033	38.3167	35.9933	35.7333	35.43	34.63	35.35	35.93	34.7433	35.5967			35.6467	35.4567	35.3333	36.13
-0.866667	35.56	37.7133	36.0967	35.8333	36.17	35.2533	35.28	38.3233	36.01	35.7767	35.4833	34.61	35.35	35.91	34.75	35.5867			35.7533	35.3967	35.2933	36.06
-0.85	35.5667	37.6933	36.0433	35.8167	36.2033	35.1867	35.27	38.32	36.04	35.88	35.5067	34.54	35.3533	35.8967	34.89	35.5533			35.8933	35.3	35.29	35.9533
-0.833333	35.6933	37.6633	36.0333	36.0367	36.1967	35.16	35.24	38.2433	36.03	35.9667	35.5467	34.5	35.3633	35.9233	34.9233	35.52			36.09	35.24	35.2933	35.9
-0.816667	35.8	37.6133	36.03	36.3167	36.2133	35.13	35.1667	38.22	36	36.0967	35.5667	34.4767	35.3567	35.96	34.9367	35.5133			36.33	35.1767	35.2733	35.8467
-0.8	35.8	37.65	35.9767	36.3767	36.2267	35.1333	35.1333	38.2133	35.9	36.2133	35.55	34.4633	35.3367	35.98	34.93	35.47			36.4067	35.1167	35.2533	35.78
-0.783333	35.7433	37.7667	35.9367	36.3767	36.2233	35.0767	35.1267	38.2167	35.7367	36.2233	35.5667	34.4667	35.3633	35.9967	34.8967	35.4967			36.3233	35.1067	35.2433	35.7267
-0.766667	35.6633	37.88	35.9233	36.39	36.2367	35.0267	35.1233	38.2133	35.6867	36.31	35.57	34.4567	35.3967	36.0067	34.84	35.5167			36.23	35.13	35.1967	35.6967
-0.75	35.6467	37.92	35.8967	36.44	36.2333	35.0133	35.1233	38.2267	35.77	36.4	35.5767	34.46	35.4167	36.02	34.8	35.4833			36.1967	35.0867	35.15	35.6633
-0.733333	35.6367	37.9367	35.88	36.4933	36.2133	34.9267	35.1	38.23	35.97	36.5033	35.5967	34.5833	35.3267	36.05	34.7233	35.41			36.17	35.05	35.14	35.7767
-0.716667	35.6233	37.9533	35.8633	36.52	36.1767	34.82	35.08	38.2333	36.0733	36.5733	35.5933	34.62	35.3167	35.92	34.6633	35.4167			36.1333	35.02	35.17	35.8267
-0.7	35.6367	37.9367	35.8333	36.6467	36.1	34.7867	35.07	38.2233	36.1633	36.5967	35.63	34.6267	35.3867	35.9567	34.7833	35.46			36.0833	34.9967	35.2767	35.8367
-0.683333	35.5633	37.92	35.8233	36.7133	36.0767	34.83	35.0533	38.1933	36.21	36.55	35.67	34.7133	35.48	36.0033	34.8133	35.48			36.0767	34.9867	35.29	35.81
-0.666667	35.3933	37.86	35.83	36.7567	36.0667	34.8333	35.0367	38.1567	36.1833	36.5067	35.68	35	35.5167	35.9633	34.8	35.5233			36.0733	35.0033	35.3	35.7833
-0.65	35.3633	37.8133	35.8633	36.77	36.08	34.8267	35.04	38.12	36.1533	36.4933	35.6533	35.0933	35.5533	35.9233	34.7967	35.51			36.0267	35.0133	35.3167	35.7667
-0.633333	35.32	37.8533	35.8667	36.72	36.06	34.8433	35.0467	38.11	36.1067	36.4667	35.6533	35.0933	35.5933	35.84	34.7967	35.5			35.99	35.0267	35.34	35.7833
-0.616667	35.2733	37.8533	35.8567	36.6933	36.04	34.82	35.0467	38.1067	35.9633	36.4533	35.6367	35.0733	35.5967	35.8433	34.87	35.5067			35.9633	35.0467	35.36	35.7967
-0.6	35.2867	37.87	35.85	36.6567	36.0633	34.7333	35.03	38.1033	35.8533	36.54	35.5867	34.95	35.5733	35.8133	34.8767	35.51			35.93	35.0567	35.3667	35.7633
-0.583333	35.2867	37.92	35.84	36.63	36.0133	34.6633	35.03	38.11	35.7833	36.4533	35.5333	34.9067	35.5567	35.77	34.85	35.5267			35.8867	35.0267	35.3633	35.7233
-0.566667	35.27	38.0033	35.82	36.6733	36.05	34.6733	35.05	38.0967	35.7467	36.21	35.52	34.92	35.53	35.8433	34.8567	35.54			35.86	34.95	35.3533	35.6833
-0.55	35.2267	38.05	35.8133	36.6633	36.2667	34.6733	35.0467	38.0367	35.6933	36.1233	35.6033	34.9233	35.5	35.9033	34.8233	35.5467			35.8467	34.9467	35.3433	35.66
-0.533333	35.21	38.0867	35.87	36.55	36.3433	34.6267	35.0533	38.0133	35.7433	36.14	35.7133	35.1467	35.4567	35.9333	34.8033	35.5533			35.81	35.0633	35.32	35.6133
-0.516667	35.2	38.1267	35.8967	36.5	36.3833	34.5833	35.0633	38.01	35.8	36.1267	35.7267	35.27	35.4267	35.92	34.8233	35.63			35.8167	35.12	35.2967	35.6067
-0.5	35.21	38.1533	35.9133	36.4933	36.3933	34.6033	35.0867	37.9967	35.87	36.1433	35.7533	35.2567	35.3967	35.91	34.8233	35.62			35.8233	35.1567	35.2767	35.6367
-0.483333	35.33	38.0867	35.9233	36.4133	36.3667	34.5967	35.1267	37.9833	35.8667	36.1267	35.7833	35.19	35.37	35.9	34.7933	35.57			35.8267	35.1933	35.2633	35.65
-0.466667	35.5033	38.0033	35.93	36.21	36.24	34.6467	35.18	37.98	35.8567	36.11	35.79	35.13	35.35	35.88	34.7467	35.5833			35.81	35.17	35.2533	35.65
-0.45	35.5533	38.0833	35.9367	36.09	36.2133	34.6833	35.3433	38	35.8367	36.1667	35.81	35.05	35.3467	35.86	34.69	35.58			35.8	35.09	35.2267	35.6433
-0.433333	35.51	38.0933	35.91	36.0633	36.2967	34.5967	35.6	38.0233	35.8167	36.1767	35.8267	34.9633	35.3067	35.84	34.7233	35.5433			35.8067	35.06	35.1933	35.6367
-0.416667	35.4167	38.08	35.89	36.17	36.3133	34.5567	35.63	38.0133	35.78	36.1333	35.8567	34.9233	35.2967	35.83	34.72	35.4267			35.8233	35.0467	35.1767	35.6267
-0.4	35.4033	38.09	35.8833	36.34	36.33	34.51	35.55	37.9667	35.7333	36.0833	35.8133	34.9367	35.29	35.83	34.6933	35.3833			35.8567	35.0133	35.1667	35.6067
-0.383333	35.4267	38.1033	35.8667	36.3267	36.3333	34.4633	35.4067	37.9433	35.68	36.0333	35.7933	34.9433	35.2267	35.82	34.64	35.3767			35.8833	35	35.22	35.5833
-0.366667	35.53	38.0567	35.8567	36.19	36.3133	34.4767	35.3	37.9467	35.63	35.99	35.7433	34.9033	35.1333	35.7967	34.6233	35.36			35.8633	34.9833	35.2367	35.5767
-0.35	35.56	38.02	35.82	36.0367	36.25	34.4867	35.33	37.9433	35.58	36.0267	35.69	34.86	35.11	35.75	34.72	35.4467			35.8167	34.97	35.2367	35.5667
-0.333333	35.7333	37.94	35.7967	35.8633	36.22	34.5467	35.4967	37.9333	35.5367	36.0333	35.6767	34.7833	35.0967	35.7433	34.7333	35.8133			35.8033	34.95	35.2233	35.5533
-0.316667	35.7367	37.89	35.7933	35.6367	36.1733	34.61	35.5733	37.92	35.5067	35.9467	35.7567	34.7333	35.1233	35.81	34.6933	35.9667			35.81	34.9433	35.21	35.5367
-0.3	35.67	37.9167	35.7933	35.6033	36.2367	34.62	35.55	37.9133	35.4967	35.8767	35.71	34.7433	35.1133	35.8533	34.6333	36.0333			35.82	34.96	35.21	35.5033
-0.283333	35.68	37.9467	35.8	35.7367	36.28	34.63	35.44	37.9233	35.5233	35.8467	35.7167	34.7733	35.11	35.9233	34.58	36.0567			35.87	34.97	35.1967	35.5
-0.266667	35.6667	38.02	35.8133	35.8533	36.3367	34.6367	35.3933	37.93	35.5267	35.85	35.7867	34.78	35.2567	35.9367	34.57	36.0833			35.9233	34.9567	35.18	35.4867
-0.25	35.6667	38.1233	35.8467	35.88	36.33	34.6133	35.43	37.9	35.4933	35.8433	35.8067	34.76	35.5533	35.92	34.57	36.08			35.95	34.93	35.1667	35.4767
-0.233333	35.6867	38.1367	35.8833	35.87	36.2833	34.5533	35.48	37.89	35.4633	35.7967	35.82	34.73	35.5167	35.92	34.5733	36.0667			35.9533	34.89	35.1667	35.4767
-0.216667	35.6667	38.15	35.9167	35.9633	36.2533	34.4733	35.4867	37.8933	35.44	35.79	35.84	34.76	35.4133	35.92	34.6333	36.07			35.95	34.8467	35.24	35.54
-0.2	35.5467	38.1767	35.9233	36.21	36.22	34.4267	35.4667	37.91	35.43	35.7767	35.86	34.8433	35.4533	35.8967	34.71	36.0567			35.96	34.83	35.3133	35.5567
-0.183333	35.4	38.17	35.9433	36.2267	36.18	34.4333	35.5	37.9267	35.4367	35.7567	35.8267	34.8533	35.4933	35.85	34.79	35.9967			35.95	34.84	35.3067	35.5833
-0.166667	35.3267	38.09	35.94	36.17	36.13	34.5267	35.5333	37.9767	35.44	35.7367	35.77	34.9533	35.4867	35.8233	34.83	36.0733			35.9233	34.9167	35.2833	35.57
-0.15	35.2467	37.9633	35.9167	36.11	36.0833	34.7733	35.5433	38.1033	35.4333	35.7167	35.66	34.9767	35.5233	35.8133	34.8633	36.08			35.8967	34.9067	35.2667	35.5567
-0.133333	35.4	37.94	35.89	36.0333	36.0733	34.8833	35.55	38.1567	35.58	35.73	35.5867	34.9733	35.57	35.8533	34.8567	36.0367			35.8667	34.9033	35.2467	35.5633
-0.116667	35.4333	37.9367	35.8667	36.0133	36.0833	34.8933	35.55	38.1833	35.7267	35.7267	35.5967	35.02	35.5033	35.9133	34.8333	36.0367			35.8433	34.9167	35.2067	35.6733
-0.1	35.48	37.8967	35.8367	36.04	36.1033	34.9167	35.58	38.1433	35.8567	35.7633	35.62	35.0733	35.47	35.91	34.82	36.02			35.82	34.9267	35.1467	35.6433
-0.0833333	35.65	37.85	35.81	35.9967	36.18	34.94	35.5867	38.0767	35.89	35.89	35.6433	35.1267	35.4833	35.8733	34.79	36.06			35.7867	34.9133	35.1267	35.5367
-0.0666667	35.6067	37.86	35.7867	35.95	36.1967	34.8433	35.5733	38.1	35.8667	35.9633	35.6767	35.0767	35.5233	35.8567	34.76	36.0733			35.7533	34.8867	35.1	35.52
-0.05	35.62	37.9267	35.7767	35.8933	36.16	34.7133	35.5467	38.1133	35.88	36.0633	35.6733	35	35.5467	35.8933	34.7333	36.03			35.7167	34.8967	35.1	35.48
-0.0333333	35.56	37.9767	35.7533	35.8167	36.0933	34.7267	35.5	38.0867	35.88	36.0967	35.6567	34.9967	35.55	35.9333	34.7033	35.92			35.69	35.0267	35.11	35.3633
-0.0166667	35.5633	38.03	35.7267	35.79	36.08	34.6967	35.4567	38.04	35.8933	36.0567	35.61	35.0133	35.53	35.9633	34.6333	35.8533			35.6867	35.1	35.1133	35.42
0	35.65	38.0433	35.7233	35.7767	36.0533	34.68	35.4267	37.745	35.89	36	35.5467	35.05	35.5067	35.9533	34.6267	35.8033			35.69	35.1633	35.11	35.53
0.0166667	35.67	38.0333	35.7267	35.74	35.98	34.66	35.41	37.74	35.8333	35.9333	35.5533	34.98	35.4467	35.93	34.64	35.7533			35.7267	35.2233	35.14	35.5633
0.0333333	35.3233	37.55	35.7867	35.53	35.82	34.6133	35.11	37.2533	35.8633	35.8333	35.7367	34.84	35.4067	35.91	34.65	35.69			35.7733	35.2567	35.25	35.7133
0.05	35.2433	36.7967	35.8767	35.5267	35.84	34.5567	35.01	37.15	35.9467	35.55	35.86	34.86	35.38	35.9667	34.65	35.69			35.7967	35.3567	35.36	35.7333
0.0666667	35.36	36.86	36.0433	35.46	35.7133	34.5467	35.2233	37.34	36.0833	35.43	35.6967	34.83	34.9467	36.04	34.61	35.8167			35.42	35.4633	35.4367	35.5533
0.0833333	35.6233	37.0367	36.18	35.81	35.6267	34.4633	35.56	37.68	36.2167	35.7433	35.4367	34.6333	34.8467	35.8667	34.7333	35.86			35.4433	35.5433	34.94	35.47
0.1	35.7833	37.1833	35.89	36.3067	35.4767	34.58	35.7867	37.9333	36.2967	36.11	35.5333	35.0533	34.8733	35.61	34.7	35.8133			35.56	34.8067	34.9767	35.5467
0.116667	35.89	37.36	36.0767	36.64	35.7467	34.8233	36.01	38.14	35.86	36.4	35.83	35.1767	34.9633	35.6167	34.7033	35.8533			35.6467	34.8633	35.2367	35.6233
0.133333	36.1467	37.6933	36.2267	37.0067	35.9	34.7867	36.11	38.4433	35.9967	36.6333	35.93	35.1367	35.1633	35.71	34.67	35.98			35.7567	34.9867	35.41	35.5833
0.15	36.3967	37.9333	36.39	37.3033	36.05	34.6433	36.1533	38.6267	36.15	36.9233	36.05	35.22	35.3133	35.8533	34.68	36.1467			35.92	35.0533	35.55	35.6867
0.166667	36.7467	38.0133	36.4933	37.6467	36.31	34.84	36.2767	38.8067	36.1267	37.1467	36.21	35.2633	35.41	36.04	34.7567	36.1967			36.0333	34.9733	35.5467	36.0833
0.183333	37.04	38.2733	36.5733	37.9	36.63	35.1867	36.42	38.9533	36.1067	37.23	36.2733	35.1367	35.59	36.18	34.81	36.28			36.06	34.9733	35.54	36.23
0.2	36.9967	38.3667	36.6433	37.98	36.7933	35.3567	36.47	39.0133	36.2233	37.26	36.3367	34.9867	35.86	36.3633	34.87	36.2533			36.0767	35.0167	35.57	36.2267
0.216667	36.87	38.6867	36.7333	37.8967	36.8967	35.3467	36.5633	38.9833	36.34	37.2767	36.42	34.9467	35.9633	36.3967	35.07	36.3133			36.03	35.1433	35.6367	36.3067
0.233333	36.7233	38.89	36.8933	37.8	37.0033	35.2833	36.7233	39.03	36.38	37.4	36.4667	34.8433	36.12	36.3633	35.0967	36.4233			35.9367	35.2733	35.7467	36.4733
0.25	36.8633	38.8767	37.0733	37.9067	37	35.15	36.88	39.1667	36.47	37.4667	36.48	35.02	36.2367	36.51	35.1233	36.6933			35.9733	35.3033	35.86	36.4567
0.266667	37.1267	38.8567	37.23	37.9333	37.01	35.2767	36.9733	39.2267	36.7967	37.4467	36.51	35.1633	36.2733	36.5967	35.2267	36.83			36.1567	35.34	36.0267	36.3
0.283333	37.07	38.9033	37.3033	37.8667	36.9767	35.4133	36.9633	39.18	36.8733	37.3667	36.51	35.1333	36.41	36.6567	35.3533	36.88			36.25	35.3567	36.26	36.2
0.3	36.9967	39	37.3233	37.86	37.11	35.5533	37.0067	39.1267	36.9133	37.23	36.52	35.1133	36.5667	36.8167	35.5233	36.89			36.2333	35.4933	36.3567	36.1933
0.316667	36.9767	39.1667	37.2967	37.9933	37.3267	35.61	36.9767	39.1033	36.9533	37.0267	36.5967	35.16	36.7333	37.1633	35.61	36.9233			36.31	35.7	36.3233	36.15
0.333333	36.9467	39.32	37.3067	38.1033	37.32	35.5067	36.82	39.1067	36.8967	37.1167	36.65	35.1233	36.79	37.27	35.7133	36.9233			36.3667	35.76	36.39	36.06
0.35	36.81	39.3867	37.3633	38.13	37.34	35.3933	36.74	39.03	36.8533	37.3667	36.67	35.1067	36.7833	37.2067	35.7533	36.8567			36.3233	35.69	36.57	36.0333
0.366667	36.8233	39.41	37.41	38.1433	37.4033	35.42	36.7033	38.9133	36.8667	37.4567	36.7033	35.1367	36.76	37.0733	35.7567	36.85			36.29	35.8333	36.6367	36.0967
0.383333	36.85	39.42	37.4267	38	37.4167	35.52	36.5467	38.9133	36.9033	37.4333	36.7533	35.2267	36.7967	37.0567	35.8767	36.9167			36.34	35.9367	36.65	36.1633
0.4	36.8233	39.48	37.4033	37.6733	37.45	35.6733	36.3933	38.9767	36.8233	37.3633	36.7767	35.33	36.91	37.0633	35.88	36.9567			36.2933	36	36.6333	36.1333
0.416667	36.8133	39.46	37.4	37.4433	37.4433	35.9333	36.45	39.0367	36.7467	37.1933	36.7333	35.24	36.8967	37.05	35.8067	36.9267			36.2367	36.17	36.5267	36.1367
0.433333	36.81	39.3633	37.3633	37.2967	37.4667	36.0267	36.58	39.11	36.7567	37.0067	36.5367	35.2033	36.8933	37.08	35.7233	36.8667			36.2367	36.19	36.35	36.1033
0.45	36.7833	39.3033	37.34	37.3067	37.5167	35.9867	36.5233	39.1433	36.7533	36.9	36.5667	35.27	36.8033	37.21	35.85	36.77			36.2567	36.08	36.23	36.06
0.466667	36.7033	39.2133	37.3733	37.5367	37.5267	35.8733	36.5133	39.13	36.7133	36.8933	36.6867	35.3433	36.71	37.2533	35.9667	36.7767			36.2367	36.1133	36.13	36.1867
0.483333	36.67	39.2	37.3333	37.62	37.4533	35.8267	36.4167	39.0867	36.6967	36.81	36.7033	35.21	36.68	37.2267	35.9733	36.74			36.23	36.1367	36.03	36.2
0.5	36.67	39.2333	37.2233	37.49	37.32	35.8567	36.2167	39.0733	36.6733	36.68	36.6367	35.1	36.8133	37.1933	36.0067	36.6933			36.2533	36.0967	35.9133	36.22
0.516667	36.6867	39.205	37.1367	37.3567	37.3467	35.9967	36.0933	39.0733	36.7233	36.5633	36.53	35.0567	36.7433	37.08	35.8833	36.7667			36.2933	36.1033	35.8833	36.2533
0.533333	36.6733	39.24	37.0533	37.3633	37.3367	35.9933	36.17	39.0533	36.7533	36.6067	36.4167	35.0267	36.6267	36.9967	35.66	36.8033			36.3033	36.1567	35.91	36.2533
0.55	36.61	39.3533	37.0467	37.2267	37.36	35.9933	36.1867	39.0167	36.7467	36.7333	36.4133	35.0233	36.4033	36.95	35.4	36.7667			36.3	36.1333	35.9367	36.18
0.566667	36.5433	39.2333	37.09	36.9833	37.3667	36.0067	36.1567	38.9533	36.7067	36.71	36.5167	35	36.32	36.7833	35.3	36.6667			36.27	36.1167	35.9667	36.1367
0.583333	36.5267	39.1567	37.0833	36.8833	37.3167	35.96	36.0667	38.9033	36.63	36.7433	36.59	34.91	36.2033	36.6667	35.27	36.5767			36.2633	36.0767	35.9967	36.1633
0.6	36.6367	39.1867	37.0833	36.87	37.29	35.8933	35.9567	38.9167	36.5733	36.7733	36.58	34.86	36.1833	36.7367	35.3267	36.6067			36.28	36.0167	35.9733	36.1833
0.616667	36.7933	39.1633	37.1167	37.07	37.3633	35.8433	35.9433	38.9167	36.57	36.8133	36.5533	34.7733	36.1967	37.1067	35.3967	36.6967			36.28	36.0767	35.9133	36.1933
0.633333	36.9	39.0767	37.18	37.1333	37.3367	35.8667	35.93	38.9033	36.5767	36.8633	36.5233	34.59	36.1733	37.18	35.4533	36.7867			36.16	36.2967	35.86	36.2067
0.65	36.8333	39.0333	37.17	37.11	37.2067	35.8767	35.91	38.85	36.55	36.8733	36.4867	34.4933	36.13	37.23	35.47	36.8067			36.0533	36.41	35.8767	36.1667
0.666667	36.6533	39.0267	37.1333	37.1367	37.0967	35.8833	35.8967	38.8133	36.5	36.8267	36.4233	34.4467	36.0867	37.21	35.4567	36.86			36.1467	36.36	35.9467	36.14
0.683333	36.57	38.98	37.1033	37.1733	37.0433	35.8233	35.8933	38.78	36.4667	36.8067	36.3533	34.4267	36.0567	37.1833	35.47	36.86			36.21	36.26	35.9667	36.17
0.7	36.5933	38.9133	37.03	37.0267	36.9833	35.78	35.8467	38.7367	36.4067	36.74	36.32	34.4333	36.02	37.1833	35.5267	36.85			36.1967	36.22	35.9667	36.25
0.716667	36.6267	38.8833	36.92	36.8333	36.8967	35.79	35.7833	38.7267	36.34	36.6	36.33	34.47	36.0433	37.16	35.6833	36.85			36.13	36.2233	36.02	36.3867
0.733333	36.5933	38.93	36.79	36.71	36.83	35.8667	35.7267	38.7333	36.2967	36.5867	36.3167	34.57	36.0333	37.1267	35.8033	36.8367			36.0833	36.1433	36.0733	36.4267
0.75	36.55	38.99	36.66	36.65	36.76	35.9067	35.6533	38.74	36.2533	36.5733	36.24	34.6167	36.0367	37.0833	35.7733	36.81			36.05	36.06	36.0267	36.3967
0.766667	36.5167	38.9633	36.6	36.85	36.6733	35.8667	35.58	38.7433	36.2133	36.45	36.2067	34.6733	36.0167	37.0467	35.7367	36.8267			35.9967	36.0233	35.8433	36.3533
0.783333	36.47	38.98	36.5667	36.9	36.5933	35.7	35.4933	38.7733	36.1567	36.27	36.17	34.6633	35.9967	37.0133	35.7033	36.9133			35.97	36.06	35.7733	36.3133
0.8	36.42	39.0367	36.4733	36.8767	36.57	35.5833	35.41	38.79	36.12	36.0067	36.13	34.6267	36.0667	37.0133	35.6833	36.9			35.9367	36.0667	35.84	36.31
0.816667	36.41	39.06	36.4067	36.83	36.54	35.5967	35.35	38.7667	36.0933	35.82	36.14	34.72	36.1333	36.9767	35.6867	36.96			35.8967	36.03	35.8867	36.3433
0.833333	36.3933	39.03	36.3667	36.7067	36.4867	35.62	35.31	38.73	36.0567	35.79	36.1233	34.8367	36.18	36.93	35.6567	37.0067			35.9	35.95	35.8833	36.3367
0.85	36.3833	38.9867	36.3533	36.5833	36.4267	35.65	35.3	38.7067	36.0167	35.7167	36.1	34.9767	36.1933	36.8967	35.6133	37.0667			35.8867	35.8267	35.8467	36.2033
0.866667	36.3633	38.96	36.3933	36.5433	36.4067	35.6633	35.2867	38.6933	35.98	35.62	36.0667	35.0567	36.19	36.8667	35.5067	37.06			35.88	35.7367	35.82	36.15
0.883333	36.3367	38.9633	36.4933	36.5	36.4333	35.6833	35.2767	38.6667	35.9467	35.5567	36.0367	35.06	36.12	36.8333	35.4333	37.0067			35.8567	35.6767	35.81	36.1767
0.9	36.2967	38.94	36.61	36.43	36.43	35.7067	35.2733	38.6633	35.9233	35.46	36.0267	35.0533	36.04	36.8133	35.39	36.9633			35.8333	35.62	35.7767	36.17
0.916667	36.2733	38.9167	36.6867	36.3467	36.4367	35.72	35.2733	38.6533	35.9067	35.44	36.0233	35.0267	36.0033	36.79	35.35	36.9433			35.8033	35.5467	35.7367	36.1467
0.933333	36.26	38.9033	36.74	36.2933	36.4767	35.6767	35.2967	38.63	35.8867	35.4133	36.0133	34.9633	35.97	36.76	35.2733	36.99			35.8	35.4433	35.73	36.1567
0.95	36.2833	38.8667	36.73	36.2167	36.57	35.4567	35.32	38.6	35.86	35.39	35.9867	34.9033	35.96	36.7333	35.22	37.0133			35.8133	35.3333	35.7433	36.1767
0.966667	36.2933	38.8233	36.7067	36.1733	36.58	35.3067	35.4033	38.59	35.8633	35.3533	35.9833	34.8033	36.0533	36.7367	35.22	37			35.8333	35.36	35.7767	36.2033
0.983333	36.2933	38.8133	36.68	36.0967	36.57	35.1733	35.4233	38.5633	35.87	35.2833	35.9833	34.73	36.0833	36.8	35.2367	36.9433			36.0067	35.4	35.7933	36.1433
1	36.2867	38.8167	36.66	36.0433	36.5567	35.0967	35.4733	38.54	35.9	35.1633	35.9767	34.6833	36.07	36.82	35.21	36.9167			35.9833	35.4033	35.7833	36.07
1.01667	36.26	38.8233	36.62	36.0167	36.5467	35.14	35.51	38.5333	35.9033	35.15	35.9867	34.65	36.0433	36.8267	35.21	36.91			35.91	35.38	35.75	36.1367
1.03333	36.2567	38.8167	36.6067	35.9867	36.5533	35.18	35.5067	38.52	35.8967	35.17	35.9833	34.6	36.1067	36.8467	35.2767	36.85			35.8633	35.3133	35.69	36.19
1.05	36.26	38.81	36.62	36.0033	36.55	35.1	35.48	38.4967	35.8633	35.2733	35.96	34.56	36.2	36.8533	35.26	36.75			35.8267	35.2633	35.6467	36.16
1.06667	36.2533	38.7667	36.67	36.23	36.5167	35.1433	35.43	38.48	35.8233	35.28	35.9267	34.5067	36.2467	36.84	35.23	36.72			35.8	35.2167	35.6267	36.2867
1.08333	36.2467	38.7333	36.7167	36.3633	36.4833	35.4433	35.3867	38.4733	35.7933	35.2333	35.8733	34.4367	36.21	36.8733	35.2467	36.7833			35.7933	35.1767	35.6	36.3533
1.1	36.2333	38.7167	36.7267	36.3133	36.4467	35.4633	35.3633	38.47	35.7767	35.2733	35.8233	34.4033	36.1767	36.9133	35.2533	36.7833			35.7967	35.18	35.55	36.3633
1.11667	36.22	38.73	36.7267	36.24	36.3767	35.36	35.37	38.48	35.7567	35.2367	35.7867	34.3233	36.17	36.9733	35.26	36.76			35.7767	35.16	35.52	36.35
1.13333	36.1933	38.7867	36.6967	36.4033	36.3233	35.4467	35.41	38.4967	35.73	35.27	35.76	34.2467	36.2033	37	35.3	36.7367			35.7567	35.1167	35.48	36.3767
1.15	36.1767	38.82	36.65	36.3467	36.2967	35.4267	35.44	38.4933	35.7133	35.3833	35.73	34.23	36.2033	36.9867	35.32	36.7267			35.74	35.07	35.4367	36.4267
1.16667	36.1933	38.85	36.6033	36.1967	36.3167	35.2033	35.5	38.4933	35.71	35.5267	35.7033	34.1567	36.1767	36.98	35.32	36.72			35.68	35.02	35.4533	36.4467
1.18333	36.1967	38.87	36.5767	36.2733	36.3233	35.2267	35.52	38.4833	35.7633	35.56	35.6833	34.1233	36.1933	36.9633	35.35	36.7267			35.6167	34.9833	35.4867	36.4533
1.2	36.1567	38.82	36.4933	36.3	36.2967	35.2267	35.51	38.4767	35.7967	35.58	35.6567	34.1067	36.23	36.9133	35.36	36.7233			35.5733	34.95	35.47	36.39
1.21667	36.07	38.82	36.46	36.3133	36.2467	35.3567	35.4833	38.4633	35.86	35.5767	35.6433	34.1433	36.2067	36.8567	35.4533	36.7033			35.5433	34.9167	35.4533	36.3467
1.23333	36.0167	38.8433	36.4467	36.3	36.2333	35.5733	35.4333	38.4633	35.9433	35.5467	35.6167	34.1933	36.19	36.8133	35.5367	36.67			35.5	34.8867	35.43	36.3333
1.25	36.0667	38.8333	36.44	36.3033	36.29	35.68	35.4233	38.4667	35.9767	35.53	35.61	34.2733	36.16	36.7667	35.5033	36.6333			35.4667	34.86	35.3967	36.3533
1.26667	36.2733	38.8233	36.44	36.2967	36.31	35.7533	35.4267	38.5033	35.99	35.4867	35.6067	34.3333	36.2067	36.73	35.4467	36.59			35.44	34.8167	35.3633	36.3467
1.28333	36.26	38.82	36.5667	36.3067	36.3967	35.7733	35.4167	38.5133	35.97	35.4233	35.58	34.41	36.3167	36.7067	35.4067	36.59			35.42	34.71	35.3367	36.29
1.3	36.2267	38.8033	36.6467	36.32	36.4567	35.68	35.4067	38.5133	35.9133	35.4133	35.58	34.4533	36.36	36.7033	35.3867	36.5767			35.3933	34.67	35.3133	36.25
1.31667	36.2533	38.7867	36.6633	36.4567	36.47	35.44	35.4067	38.52	35.8767	35.4033	35.59	34.5167	36.3633	36.6767	35.4067	36.5533			35.3567	34.6667	35.3167	36.2267
1.33333	36.3133	38.7867	36.65	36.4833	36.45	35.31	35.4067	38.5133	35.8533	35.38	35.6167	34.54	36.3333	36.6633	35.3	36.54			35.1933	34.6267	35.32	36.21
1.35	36.32	38.8033	36.6167	36.4367	36.4667	35.24	35.4167	38.5067	35.83	35.3567	35.6267	34.5733	36.32	36.67	35.28	36.5			35.1067	34.56	35.3233	36.2
1.36667	36.2867	38.7867	36.6033	36.39	36.5433	35.2133	35.4167	38.51	35.8367	35.3267	35.66	34.6567	36.32	36.62	35.3167	36.4533			35.0933	34.59	35.3167	36.1667
1.38333	36.2733	38.7767	36.6067	36.3967	36.58	35.24	35.38	38.52	35.8133	35.2967	35.67	34.7033	36.3033	36.5967	35.33	36.4067			35.2633	34.62	35.3067	36.1267
1.4	36.2867	38.75	36.5833	36.3867	36.6333	35.2533	35.3467	38.55	35.7767	35.2133	35.7033	34.7133	36.2933	36.5767	35.32	36.36			35.3567	34.63	35.2867	36.1067
1.41667	36.24	38.72	36.5767	36.39	36.6867	35.3333	35.33	38.5767	35.73	35.0867	35.7967	34.77	36.2833	36.6133	35.3233	36.3233			35.37	34.6167	35.2667	36.0767
1.43333	36.1867	38.6967	36.5867	36.39	36.61	35.3467	35.3133	38.5867	35.7033	35.0833	35.8467	34.78	36.2567	36.62	35.41	36.3133			35.38	34.6133	35.2633	36.0533
1.45	36.14	38.69	36.5933	36.44	36.5367	35.33	35.2933	38.6067	35.68	35.1133	35.9167	34.7367	36.26	36.6133	35.4467	36.2967			35.3367	34.6	35.2533	35.9733
1.46667	36.0867	38.6967	36.5667	36.5133	36.4733	35.3133	35.28	38.6233	35.6733	35.15	35.9733	34.69	36.3833	36.61	35.45	36.27			35.3033	34.5767	35.2433	35.81
1.48333	36.05	38.6933	36.5167	36.5633	36.4967	35.2733	35.2633	38.6333	35.6533	35.18	35.9967	34.7	36.4433	36.5867	35.45	36.25			35.2433	34.55	35.2367	35.7867
1.5	36.0067	38.6967	36.4867	36.5567	36.53	35.1467	35.2633	38.6	35.6567	35.2733	36.0667	34.6867	36.46	36.57	35.4333	36.23			35.1933	34.5833	35.2367	35.7267
1.51667	35.96	38.7133	36.4833	36.5433	36.55	35.0467	35.2967	38.5533	35.67	35.36	36.11	34.6833	36.42	36.55	35.3567	36.2167			35.17	34.6533	35.25	35.7267
1.53333	35.9067	38.7	36.48	36.5567	36.6467	34.99	35.28	38.54	35.7033	35.44	36.0733	34.67	36.4067	36.5867	35.2933	36.2133			35.12	34.68	35.2733	35.7367
1.55	35.8833	38.6667	36.4767	36.5533	36.6133	34.96	35.1767	38.5433	35.74	35.5467	36.0567	34.6067	36.4567	36.5933	35.2733	36.2167			34.98	34.6833	35.36	35.7767
1.56667	35.87	38.6467	36.4767	36.5367	36.58	35.0533	35.1867	38.5433	35.76	35.6167	36.02	34.5767	36.4433	36.6033	35.2533	36.19			34.9033	34.6833	35.4133	35.7933
1.58333	35.8333	38.64	36.5233	36.5167	36.5433	34.9067	35.24	38.5367	35.7433	35.7133	36.0833	34.5667	36.4867	36.5867	35.2067	36.1267			34.83	34.68	35.4133	35.7933
1.6	35.82	38.6267	36.5367	36.4833	36.5167	34.7733	35.26	38.5767	35.72	35.92	36.1567	34.5367	36.5167	36.5833	35.1733	36.0933			34.82	34.66	35.39	35.78
1.61667	35.8033	38.6133	36.5167	36.5167	36.4833	34.7367	35.2633	38.6233	35.6867	36.0567	36.1467	34.5067	36.4533	36.59	35.1333	36.0933			34.83	34.6133	35.3533	35.7667
1.63333	35.7867	38.61	36.4867	36.6833	36.4567	34.77	35.2833	38.62	35.7067	36.1133	36.0933	34.5033	36.4267	36.51	35.1033	36.09			34.97	34.59	35.31	35.7967
1.65	35.79	38.6033	36.5133	36.89	36.43	34.8467	35.2967	38.59	35.78	36.1067	36.0633	34.5767	36.4167	36.4133	35.1	36.17			35	34.59	35.2733	35.8667
1.66667	35.7833	38.6	36.5233	37.1133	36.4167	34.8867	35.2867	38.51	35.7867	36.0567	36.0567	34.6233	36.4233	36.3933	35.1	36.2267			34.9933	34.59	35.2533	35.86
1.68333	35.77	38.5833	36.52	37.2	36.4067	34.88	35.28	38.48	35.77	35.9867	35.9333	34.6433	36.4433	36.4333	35.09	36.2633			35.0533	34.5733	35.2267	35.8167
1.7	35.77	38.5467	36.4933	37.2467	36.3967	34.96	35.2567	38.4233	35.7633	35.9467	35.79	34.6767	36.42	36.42	35.0933	36.28			35.12	34.5533	35.2267	35.77
1.71667	35.7567	38.5367	36.4567	37.3933	36.41	35.08	35.31	38.3867	35.7633	36.01	35.5733	34.7033	36.37	36.44	35.0733	36.26			35.0967	34.52	35.2367	35.7433
1.73333	35.7233	38.5167	36.5033	37.5067	36.4233	35.1733	35.42	38.3933	35.7667	36.0133	35.4633	34.7067	36.22	36.47	34.91	36.1767			34.9433	34.4933	35.2633	35.7367
1.75	35.67	38.49	36.5833	37.5333	36.41	35.25	35.4167	38.3867	35.7867	35.9933	35.45	34.6867	36.1933	36.48	34.94	36.1667			35.0667	34.48	35.31	35.8333
1.76667	35.62	38.47	36.6733	37.63	36.42	35.3167	35.4067	38.4	35.7933	35.94	35.5	34.6633	36.2133	36.4633	35.1367	36.14			35.1867	34.4867	35.33	35.8967
1.78333	35.5867	38.47	36.7233	37.6567	36.43	35.3267	35.3967	38.4067	35.79	35.86	35.51	34.66	36.15	36.4667	35.1233	36.1333			35.12	34.49	35.34	35.9267
1.8	35.51	38.4533	36.73	37.6367	36.4233	35.35	35.4033	38.4367	35.8033	35.78	35.5867	34.6567	35.96	36.4867	35.0567	36.1933			35.0867	34.49	35.36	35.9233
1.81667	35.3933	38.52	36.7367	37.6	36.4133	35.3533	35.4067	38.4833	35.8067	35.7133	35.5633	34.6633	35.8733	36.4467	35.0367	36.3			35.12	34.49	35.3933	35.9167
1.83333	35.4	38.58	36.72	37.4667	36.4033	35.3367	35.4133	38.49	35.8033	35.7033	35.55	34.7667	35.85	36.38	34.9833	36.37			35.1333	34.4367	35.3933	35.9067
1.85	35.4067	38.6	36.68	37.31	36.3833	35.3067	35.4133	38.4733	35.79	35.65	35.6067	34.7767	35.8267	36.3367	34.8467	36.4167			35.08	34.3667	35.39	35.8967
1.86667	35.4433	38.625	36.67	37.2133	36.3667	35.2567	35.3967	38.47	35.79	35.59	35.7067	34.8567	35.7967	36.3033	34.76	36.41			35.05	34.3467	35.4	35.8467
1.88333	35.5067	38.665	36.6767	37.1067	36.36	35.19	35.38	38.4567	35.8467	35.5233	35.7233	34.89	35.8067	36.28	34.7667	36.35			35.1067	34.35	35.4033	35.8233
1.9	35.7267	38.6567	36.68	36.9533	36.35	35.1867	35.3867	38.43	35.9033	35.5067	35.7133	34.87	35.8833	36.3067	34.7967	36.2433			35.2	34.4967	35.3867	35.8633
1.91667	35.7567	38.66	36.6733	36.8667	36.3433	35.2267	35.3733	38.4067	35.9167	35.55	35.7267	34.8533	35.8867	36.33	34.8167	36.2067			35.3	34.5467	35.3367	35.9167
1.93333	35.76	38.6233	36.6533	36.9967	36.3433	35.2267	35.3667	38.3867	35.9267	35.5367	35.7267	34.9933	35.8167	36.3533	34.8933	36.1367			35.4433	34.63	35.3467	35.9667
1.95	35.76	38.5133	36.6267	37.0533	36.32	35.2767	35.37	38.38	35.9233	35.5133	35.7133	35.1567	35.74	36.41	34.9667	36.08			35.51	34.6733	35.35	36.0033
1.96667	35.75	38.4933	36.59	37.04	36.2867	35.3233	35.4033	38.3867	35.8967	35.4867	35.6767	35.24	35.6533	36.5233	35.0433	36.0433			35.5733	34.6733	35.31	35.9833
1.98333	35.7367	38.61	36.58	36.9233	36.27	35.3367	35.4133	38.39	35.89	35.4467	35.6367	35.2533	35.65	36.54	35.0767	36.0033			35.5133	34.69	35.1867	35.94
2	35.7367	38.67	36.58	36.88	36.27	35.3133	35.4133	38.3733	35.9233	35.4	35.5933	35.26	35.67	36.6067	35.1467	35.98			35.34	34.71	35.1733	35.8867
2.01667	35.74	38.7033	36.57	36.8333	36.27	35.15	35.4067	38.34	35.9333	35.3333	35.57	35.3033	35.6367	36.76	35.1967	35.9567			35.1933	34.7167	35.2567	35.8333
2.03333	35.72	38.7067	36.55	36.7533	36.2333	35.0133	35.4033	38.4167	35.9233	35.28	35.58	35.3133	35.6267	36.84	35.22	35.9367			35.2133	34.72	35.3367	35.7933
2.05	35.7	38.6967	36.5367	36.63	36.0733	34.9533	35.4	38.4933	35.9267	35.2467	35.5767	35.26	35.61	36.92	35.31	35.9167			35.2433	34.7167	35.3367	35.7633
2.06667	35.6933	38.6333	36.53	36.5433	36.03	34.9333	35.4	38.5333	35.95	35.2367	35.5767	35.1133	35.5867	36.9667	35.3367	35.9033			35.2367	34.71	35.35	35.7333
2.08333	35.69	38.58	36.5167	36.47	36.0767	35.03	35.3867	38.5867	35.95	35.1933	35.5733	35.0267	35.5933	36.9467	35.3467	35.9033			35.19	34.69	35.3533	35.72
2.1	35.69	38.55	36.49	36.4233	36.1133	35.03	35.38	38.6167	35.9633	35.16	35.5667	35.0133	35.6433	36.9233	35.3733	35.9167			35.0467	34.67	35.33	35.7233
2.11667	35.6767	38.5633	36.4667	36.38	36.1167	34.98	35.38	38.62	35.99	35.1333	35.5667	34.94	35.75	36.8433	35.35	35.92			35.0967	34.6633	35.3233	35.7333
2.13333	35.67	38.5667	36.44	36.32	36.0933	35.02	35.4233	38.5867	35.99	35.1833	35.5667	34.8867	35.7833	36.7267	35.29	35.9167			35.1767	34.66	35.33	35.7667
2.15	35.6533	38.4233	36.4167	36.2367	36.12	35.0633	35.43	38.53	35.9933	35.27	35.51	34.8833	35.8033	36.6067	35.37	35.8967			35.15	34.6533	35.3567	35.7767
2.16667	35.65	38.3567	36.39	36.18	36.15	35.1867	35.43	38.5067	36.0333	35.2567	35.49	34.89	35.8133	36.5167	35.5167	35.8733			34.9467	34.6433	35.36	35.77
2.18333	35.6533	38.39	36.3633	36.1167	36.1567	35.31	35.5967	38.4633	36.1467	35.1967	35.4933	34.9333	35.7667	36.52	35.4967	35.88			34.85	34.6567	35.3567	35.7667
2.2	35.6533	38.43	36.3333	36.0733	36.1967	35.33	35.6267	38.36	36.1433	35.1967	35.5067	35.0033	35.7933	36.4867	35.43	35.8833			34.8733	34.6667	35.3467	35.7467
2.21667	35.67	38.6433	36.2933	36.0467	36.2067	35.27	35.5467	38.1867	36.14	35.2267	35.5033	34.98	36.05	36.44	35.4033	35.8733			34.9233	34.6533	35.3333	35.7167
2.23333	35.6667	38.7067	36.2367	36.0467	36.22	35.2067	35.49	38.08	36.1767	35.2167	35.5	35.0167	36.1333	36.39	35.4	35.96			34.9333	34.6433	35.3667	35.7267
2.25	35.7167	38.6633	36.1633	36	36.2333	35.2367	35.4267	38.0967	36.16	35.2133	35.4967	35.0433	36.1233	36.3433	35.38	36.0767			35.0267	34.58	35.3833	35.7267
2.26667	35.7767	38.5967	36.1133	35.9433	36.22	35.2733	35.3433	38.19	36.16	35.21	35.47	35.1333	36.1467	36.3067	35.4133	36.1067			35.1067	34.54	35.3567	35.7333
2.28333	35.8367	38.4467	36.08	35.87	36.2067	35.32	35.32	38.2567	36.1933	35.22	35.41	35.14	36.1067	36.2867	35.4767	36.1567			35.1533	34.5167	35.3167	35.73
2.3	35.8767	38.4567	36.0267	35.8133	36.2233	35.4067	35.3367	38.2467	36.1733	35.2567	35.3533	35.1267	36.1733	36.2767	35.4867	36.17			35.24	34.5133	35.2933	35.7233
2.31667	35.87	38.53	35.9833	35.7367	36.22	35.5	35.3333	38.2567	36.1367	35.2667	35.3	35.13	36.4233	36.2467	35.5067	36.1833			35.3467	34.5	35.2467	35.7033
2.33333	35.8567	38.61	35.9867	35.69	36.18	35.52	35.3233	38.3633	36.13	35.2533	35.2633	35.1633	36.5133	36.1733	35.4533	36.22			35.43	34.4933	35.2333	35.6767
2.35	35.8533	38.69	36.0067	35.65	36.2033	35.46	35.3567	38.4667	36.13	35.2567	35.23	35.18	36.56	36.0967	35.39	36.2567			35.4767	34.5067	35.2167	35.6733
2.36667	35.8967	38.73	36.0933	35.63	36.2567	35.4933	35.46	38.4833	36.1433	35.3133	35.2133	35.1567	36.44	36.14	35.3767	36.28			35.4533	34.5567	35.1733	35.67
2.38333	35.9167	38.7567	36.1367	35.7333	36.2533	35.7133	35.5433	38.5033	36.1667	35.3333	35.1833	35.1767	36.36	36.1467	35.4	36.3167			35.4	34.5833	35.0867	35.6533
2.4	35.8933	38.7867	36.19	35.76	36.2	35.7133	35.47	38.5	36.1567	35.3433	35.1933	35.2233	36.3167	36.1767	35.4233	36.3167			35.42	34.59	35.0633	35.6433
2.41667	35.8733	38.7633	36.1967	35.7667	36.1767	35.7233	35.46	38.4433	36.1533	35.32	35.21	35.2567	36.28	36.2033	35.6033	36.2833			35.4033	34.62	35.0967	35.6267
2.43333	35.8767	38.7333	36.1967	35.8067	36.1533	35.7567	35.55	38.4333	36.1433	35.2133	35.21	35.33	36.27	36.21	35.67	36.2867			35.36	34.6767	35.1267	35.61
2.45	35.9333	38.7167	36.1967	35.8	36.13	35.7833	35.57	38.4333	36.1267	35.1767	35.21	35.3567	36.2733	36.2267	35.6233	36.29			35.31	34.74	35.1867	35.5733
2.46667	35.9733	38.6833	36.2433	35.7933	36.1033	35.7867	35.5833	38.4267	36.1067	35.2567	35.1833	35.2733	36.3067	36.2133	35.4967	36.2933			35.2333	34.7933	35.1933	35.54
2.48333	36.0133	38.6267	36.4	35.7867	36.07	35.79	35.6133	38.45	36.0667	35.2533	35.18	35.0433	36.3867	36.1133	35.5567	36.3			35.2067	34.8267	35.21	35.5167
2.5	36.01	38.6233	36.3867	35.7533	36.0633	35.7933	35.6067	38.4733	35.96	35.3367	35.23	34.8167	36.44	36.0233	35.6333	36.3467			35.1933	34.8267	35.3033	35.5133
2.51667	35.9833	38.7133	36.38	35.6867	36.0933	35.8267	35.5933	38.4967	35.8933	35.4333	35.2767	34.7067	36.45	36.0767	35.6	36.3333			35.2167	34.8	35.3233	35.51
2.53333	35.96	38.7433	36.4033	35.5967	36.1633	35.8067	35.61	38.53	35.9033	35.53	35.3067	34.66	36.4067	36.2267	35.52	36.2867			35.3267	34.7767	35.3133	35.5
2.55	35.97	38.7633	36.3633	35.5233	36.19	35.7667	35.6633	38.55	35.94	35.54	35.3367	34.71	36.3467	36.1967	35.4633	36.3067			35.39	34.71	35.2633	35.49
2.56667	35.98	38.7633	36.33	35.4867	36.22	35.72	35.6633	38.63	36.0067	35.56	35.4067	34.9233	36.27	36.1367	35.42	36.3467			35.3933	34.6633	35.2433	35.4767
2.58333	35.8967	38.8	36.5133	35.48	36.2233	35.68	35.6067	38.6233	36.0067	35.6433	35.4367	34.96	36.17	36.1067	35.33	36.36			35.2367	34.6833	35.2667	35.4933
2.6	35.8867	38.8033	36.7633	35.46	36.23	35.6333	35.5433	38.57	36.0233	35.6633	35.4467	34.9567	36.08	36.1	35.3733	36.4033			35.0767	34.7267	35.2667	35.5267
2.61667	35.9	38.72	37.0467	35.42	36.2367	35.6167	35.5	38.51	36.0233	35.6567	35.4367	34.94	35.9967	36.16	35.48	36.3867			35.0667	34.74	35.3033	35.54
2.63333	35.84	38.6933	37.2467	35.3733	36.23	35.6	35.47	38.4833	36.0533	35.6267	35.42	34.94	35.9233	36.1533	35.51	36.3367			35.0167	34.73	35.2867	35.54
2.65	35.8267	38.7433	37.3067	35.34	36.2467	35.6067	35.4367	38.48	36.1067	35.5567	35.4167	34.88	35.8867	36.0433	35.5267	36.3067			34.9867	34.7167	35.2567	35.5333
2.66667	35.8367	38.7433	37.22	35.3133	36.26	35.5967	35.4567	38.4967	36.1167	35.49	35.4233	34.8767	35.87	36.02	35.5333	36.3167			34.9867	34.7333	35.2267	35.5267
2.68333	35.81	38.7067	37.14	35.22	36.25	35.57	35.43	38.48	36.12	35.4133	35.4233	34.8267	35.8567	36.0633	35.5767	36.2467			34.9567	34.73	35.23	35.5167
2.7	35.7267	38.6567	37.14	35.2967	36.1967	35.53	35.3133	38.4233	36.1233	35.3633	35.42	34.78	35.8367	36.1233	35.57	36.1633			34.98	34.7133	35.2033	35.5067
2.71667	35.62	38.6733	37.0967	35.3233	36.1367	35.4767	35.2667	38.36	36.0967	35.3367	35.4067	34.8067	35.8633	36.1467	35.56	36.2			35.01	34.6833	35.15	35.4833
2.73333	35.6567	38.72	37.0567	35.3433	36.1633	35.4333	35.2267	38.31	36.03	35.3167	35.3767	34.8	35.8967	36.1433	35.6167	36.19			34.9733	34.6433	35.1433	35.4533
2.75	35.79	38.6933	37.1333	35.5333	36.2367	35.4	35.22	38.3133	35.9733	35.3233	35.3533	34.9033	35.8967	36.1367	35.5967	36.1533			34.97	34.6133	35.1667	35.4367
2.76667	35.84	38.6833	37.1867	35.88	36.2633	35.3833	35.22	38.28	36.0067	35.2733	35.3367	35.16	35.88	36.12	35.5033	36.1167			34.98	34.5867	35.2233	35.4267
2.78333	35.85	38.6667	37.1333	36.1	36.35	35.35	35.28	38.28	36.0267	35.2467	35.3267	35.4067	35.8567	36.0867	35.48	36.0767			34.9867	34.57	35.2567	35.43
2.8	35.98	38.5633	37.08	36.2	36.4067	35.3	35.3467	38.3367	36.0233	35.2133	35.2967	35.57	35.8233	36.0467	35.4633	36.0567			34.9933	34.5567	35.2967	35.45
2.81667	35.91	38.4867	37.0433	36.32	36.42	35.26	35.3833	38.39	36.0533	35.1967	35.2733	35.5833	35.78	35.9933	35.4467	36.0667			34.9833	34.5267	35.5033	35.48
2.83333	35.9267	38.4833	37	36.4333	36.41	35.2467	35.3833	38.3567	36.1033	35.1867	35.27	35.56	35.7767	35.9767	35.4267	36.0967			34.98	34.5233	35.6033	35.4733
2.85	35.9433	38.5133	36.99	36.52	36.3367	35.28	35.3967	38.3667	36.1033	35.2067	35.2633	35.5667	35.7933	35.9633	35.39	36.1			34.9767	34.54	35.6333	35.5333
2.86667	35.94	38.5267	36.9367	36.4967	36.29	35.3167	35.43	38.59	36.0633	35.2933	35.27	35.5967	35.8	35.9333	35.3167	36.0967			34.93	34.54	35.65	35.6133
2.88333	35.9067	38.5333	36.8433	36.5367	36.29	35.39	35.4433	38.69	36.0233	35.2933	35.2833	35.6833	35.7967	35.9067	35.2733	36.0867			34.9433	34.49	35.67	35.6533
2.9	35.7433	38.52	36.7667	36.52	36.28	35.4267	35.4067	38.355	36.03	35.2567	35.3367	35.7233	35.7833	35.9	35.2533	36.0633			34.99	34.44	35.6633	35.5767
2.91667	35.4467	38.5167	36.7067	36.4267	36.22	35.3867	35.3333	38.36	36.0467	35.3633	35.3567	35.7533	35.7733	35.8933	35.22	36.0367			35	34.4033	35.6333	35.5367
2.93333	35.3567	38.5533	36.65	36.3733	36.1967	35.35	35.2733	38.355	36.0567	35.4133	35.2567	35.7533	35.7233	35.8667	35.1633	36.0133			34.97	34.3833	35.56	35.54
2.95	35.3067	38.5767	36.5833	36.3033	36.2033	35.33	35.22	38.33	36.05	35.56	35.17	35.7133	35.5933	35.8467	35.18	36.0167			34.9467	34.3633	35.55	35.5733
2.96667	35.4067	38.5833	36.54	36.3067	36.3533	35.32	35.18	38.6267	36.05	35.6233	35.1533	35.7167	35.5267	35.8567	35.21	36.0167			34.9467	34.3433	35.6	35.6233
2.98333	35.44	38.59	36.5367	36.4033	36.3933	35.3433	35.1433	38.55	36.1133	35.6433	35.1767	35.78	35.5367	35.8433	35.2033	35.9			34.94	34.35	35.5967	35.6833
3	35.6033	38.5633	36.5267	36.42	36.38	35.3867	35.0933	38.4833	36.1367	35.71	35.26	35.7833	35.6	35.8033	35.2367	35.85			34.93	34.4933	35.5467	35.7
3.01667	35.58	38.55	36.5067	36.3933	36.3433	35.5533	35.0167	38.4667	36.1433	35.7333	35.3733	35.7533	35.6367	35.77	35.2833	35.9433			34.9967	34.53	35.51	35.7167
3.03333	35.43	38.6	36.5067	36.4133	36.31	35.5867	34.9767	38.4833	36.15	35.74	35.3933	35.7333	35.72	35.7567	35.31	36.0333			35.0867	34.53	35.4933	35.7267
3.05	35.35	38.65	36.53	36.4233	36.2867	35.6333	34.95	38.5533	36.1467	35.7767	35.42	35.7167	35.7267	35.7467	35.3467	36.11			35.1433	34.5767	35.45	35.7133
3.06667	35.3033	38.6633	36.6133	36.3467	36.27	35.5867	34.9367	38.5933	36.14	35.7733	35.45	35.7267	35.7167	35.74	35.35	36.1633			35.1367	34.6233	35.4167	35.7
3.08333	35.3067	38.6567	36.67	36.2033	36.0833	35.5433	34.8967	38.58	36.1267	35.7433	35.47	35.73	35.7067	35.7	35.2833	36.1767			35.1433	34.66	35.4433	35.7433
3.1	35.3533	38.64	36.7033	36.1	35.8767	35.49	34.8867	38.54	36.1233	35.7267	35.4333	35.7333	35.6967	35.6667	35.26	36.1967			35.1867	34.7633	35.4833	35.81
3.11667	35.4	38.6267	36.71	36.1067	35.9733	35.5933	34.9233	38.4933	36.1	35.72	35.4233	35.6267	35.6967	35.6733	35.2467	36.2467			35.1933	35.0333	35.4867	35.7667
3.13333	35.4167	38.6433	36.73	36.08	36.1	35.61	35.0067	38.4933	36.0733	35.7	35.4167	35.5333	35.6967	35.6967	35.2567	36.2933			35.1733	35.11	35.5133	35.74
3.15	35.4233	38.62	36.7533	36.06	36.18	35.6367	35.0367	38.5567	36.0433	35.69	35.4033	35.57	35.7033	35.73	35.3	36.4033			35.1667	35.1467	35.53	35.7667
3.16667	35.45	38.6	36.7567	36.1033	36.1033	35.6467	35.2667	38.5633	36.0133	35.72	35.4133	35.5933	35.7133	35.7367	35.3067	36.4833			35.1633	35.18	35.5	35.7867
3.18333	35.4333	38.5867	36.7567	36.14	36.1367	35.62	35.29	38.5367	35.97	35.7333	35.4967	35.52	35.7833	35.77	35.27	36.5667			35.1367	35.2333	35.5	35.8333
3.2	35.4167	38.57	36.7667	36.1333	36.3267	35.5767	35.2667	38.4967	35.9333	35.7367	35.4967	35.4833	35.8233	35.86	35.2933	36.5933			35.0933	35.2767	35.4967	35.9033
3.21667	35.3933	38.55	36.7433	36.0433	36.4433	35.5167	35.2367	38.45	35.91	35.7433	35.49	35.5667	35.8933	35.89	35.3567	36.6233			35.0667	35.3033	35.46	35.9033
3.23333	35.38	38.5467	36.72	35.99	36.47	35.4733	35.2167	38.47	35.88	35.7267	35.48	35.5567	35.9033	35.8933	35.4467	36.5767			35.0567	35.32	35.4267	35.9033
3.25	35.3733	38.5533	36.7033	35.9633	36.5233	35.4767	35.2	38.5933	35.8167	35.7567	35.46	35.44	35.8633	35.8867	35.5233	36.43			35.0333	35.3367	35.3933	35.88
3.26667	35.37	38.5233	36.6767	35.8433	36.53	35.5633	35.2133	38.6967	35.7767	35.78	35.4533	35.3833	35.85	35.88	35.5633	36.46			35.0233	35.3567	35.37	35.8767
3.28333	35.34	38.51	36.61	35.7967	36.5167	35.6133	35.2367	38.7033	35.7433	35.7533	35.48	35.4133	35.8333	35.9033	35.5533	36.53			35.02	35.36	35.37	35.8667
3.3	35.2967	38.5533	36.56	35.8833	36.5033	35.6333	35.2333	38.69	35.6933	35.7067	35.5033	35.37	35.8233	35.99	35.5367	36.55			35.0133	35.3633	35.3333	35.8233
3.31667	35.3033	38.5467	36.5167	35.87	36.4867	35.6167	35.2267	38.6833	35.66	35.6533	35.5133	35.31	35.81	36.0067	35.4533	36.6			35.06	35.3867	35.3	35.7933
3.33333	35.29	38.4467	36.4867	35.8533	36.48	35.58	35.21	38.6833	35.6633	35.6067	35.5267	35.3067	35.8	36	35.4267	36.6033			35.0667	35.3867	35.3	35.78
3.35	35.2767	38.4467	36.4367	35.8333	36.4333	35.55	35.19	38.67	35.6833	35.59	35.5167	35.4333	35.7833	36.0167	35.3833	36.6067			35.0567	35.3767	35.3167	35.7667
3.36667	35.2633	38.4367	36.3367	35.7633	36.3933	35.5233	35.1867	38.64	35.6733	35.59	35.5267	35.4833	35.7733	36.06	35.3533	36.65			35.0233	35.3867	35.2967	35.7333
3.38333	35.24	38.3167	36.2867	35.6767	36.35	35.5167	35.1767	38.6267	35.6633	35.5933	35.5267	35.4733	35.7367	36.0033	35.35	36.6667			34.9867	35.38	35.24	35.7033
3.4	35.2067	38.2833	36.28	35.6333	36.32	35.5067	35.0867	38.57	35.6567	35.5867	35.49	35.4467	35.7167	35.8733	35.3	36.6533			34.9767	35.3633	35.26	35.67
3.41667	35.1867	38.37	36.29	35.5967	36.3	35.4933	35.0933	38.43	35.6433	35.5567	35.44	35.49	35.7067	35.8767	35.2367	36.6167			34.96	35.35	35.26	35.68
3.43333	35.18	38.4467	36.3	35.5467	36.3567	35.4533	35.09	38.3567	35.65	35.5267	35.35	35.5433	35.7233	35.86	35.2733	36.5867			34.92	35.3333	35.2733	35.6967
3.45	35.16	38.5133	36.33	35.4867	36.34	35.4233	35.0867	38.34	35.6467	35.52	35.2967	35.55	35.71	35.86	35.3	36.5333			34.9067	35.33	35.29	35.7833
3.46667	35.14	38.5433	36.34	35.4167	36.3067	35.44	35.17	38.3267	35.6333	35.52	35.2333	35.5467	35.6733	35.8533	35.27	36.49			34.8467	35.3367	35.2733	35.8467
3.48333	35.1333	38.5533	36.3067	35.3667	36.2833	35.5133	35.2567	38.3133	35.61	35.51	35.2467	35.5367	35.6833	35.8367	35.2733	36.4633			34.83	35.3633	35.2567	35.8667
3.5	35.2233	38.56	36.2933	35.3433	36.2867	35.5733	35.2933	38.31	35.6	35.52	35.2333	35.5033	35.6833	35.82	35.3067	36.4333			34.84	35.3833	35.2567	35.87
3.51667	35.34	38.5667	36.2833	35.3367	36.2867	35.62	35.29	38.32	35.66	35.52	35.1733	35.4633	35.6667	35.8	35.28	36.4167			34.9233	35.37	35.3	35.86
3.53333	35.3333	38.57	36.29	35.3033	36.28	35.6967	35.2667	38.3367	35.6367	35.5233	35.1833	35.4067	35.6667	35.7067	35.1867	36.42			34.9867	35.36	35.3333	35.84
3.55	35.3267	38.5767	36.3067	35.2667	36.2733	35.7667	35.2367	38.3567	35.66	35.5833	35.3633	35.35	35.6233	35.47	34.9933	36.4167			34.9967	35.3567	35.3267	35.8
3.56667	35.3167	38.57	36.3167	35.24	36.2533	35.8133	35.2267	38.3767	35.8467	35.6433	35.3667	35.3167	35.7767	35.39	34.8833	36.41			34.9333	35.3533	35.2967	35.7367
3.58333	35.28	38.5733	36.3233	35.23	36.2133	35.8367	35.23	38.3967	35.9467	35.64	35.2433	35.2833	35.8467	35.3233	34.8833	36.4			34.87	35.3567	35.27	35.73
3.6	35.13	38.58	36.3167	35.25	36.1767	35.8533	35.2133	38.4	35.9633	35.62	35.1633	35.3	35.86	35.4067	34.9267	36.39			34.83	35.3933	35.2567	35.73
3.61667	35.06	38.5967	36.3	35.2467	36.14	35.83	35.16	38.38	35.96	35.4967	35.1533	35.2767	35.8667	35.5567	34.9533	36.37			34.79	35.4	35.21	35.6833
3.63333	35.0433	38.6167	36.2867	35.2333	36.1233	35.7933	35.1367	38.37	35.92	35.3367	35.1667	35.25	35.9433	35.5833	34.9433	36.35			34.7567	35.4233	35.1933	35.63
3.65	35.0333	38.5733	36.35	35.1833	36.12	35.88	35.13	38.3567	35.8367	35.2333	35.1733	35.26	35.9667	35.59	34.9033	36.33			34.72	35.4433	35.1767	35.5967
3.66667	35.0267	38.51	36.3467	35.1733	36.1	35.9533	35.12	38.3333	35.8233	35.2567	35.1933	35.24	35.95	35.63	34.83	36.31			34.71	35.4467	35.1367	35.5867
3.68333	35.03	38.52	36.32	35.1633	36.09	35.9333	35.1133	38.3167	35.8367	35.2867	35.2	35.13	35.9033	35.6167	34.79	36.3133			34.8967	35.4767	35.11	35.57
3.7	35.0433	38.5067	36.3033	35.21	36.0767	35.8533	35.11	38.3033	35.8567	35.26	35.22	35.0733	35.8567	35.5967	34.78	36.33			34.8767	35.4867	35.08	35.5433
3.71667	35.0567	38.45	36.2967	35.27	36.05	35.8567	35.1067	38.3	35.8633	35.18	35.31	35.0167	35.7667	35.5733	34.9033	36.3333			34.7733	35.4933	35.0567	35.5067
3.73333	35.06	38.39	36.2967	35.3333	36.02	35.87	35.0833	38.31	35.8533	35.21	35.3167	34.93	35.71	35.6567	35.0567	36.3267			34.6933	35.5	35.0333	35.53
3.75	35.1533	38.36	36.3	35.3633	35.9967	35.89	35.0633	38.3467	35.8133	35.3367	35.3167	34.8867	35.6067	35.71	35.0533	36.3167			34.6667	35.55	35.0433	35.56
3.76667	35.2067	38.35	36.3	35.37	35.9933	35.9	35.0333	38.3133	35.79	35.3833	35.3833	34.8733	35.66	35.7333	35.02	36.28			34.6367	35.5933	35.0167	35.5867
3.78333	35.0867	38.3733	36.29	35.3567	35.97	35.85	35.0067	38.2867	35.81	35.3767	35.44	34.91	35.7	35.7933	35.01	36.2433			34.62	35.59	34.9967	35.63
3.8	35.1267	38.4	36.2967	35.32	35.94	35.9233	34.99	38.2767	35.8433	35.3767	35.4667	35.15	35.74	35.9033	35.0933	36.23			34.68	35.55	35.01	35.6367
3.81667	35.2567	38.41	36.31	35.2633	35.9433	35.92	34.9967	38.2633	35.86	35.5267	35.46	35.27	35.7233	36.0067	35.0867	36.2267			34.76	35.52	35.0133	35.61
3.83333	35.3	38.4167	36.3133	35.2233	35.9333	35.8333	35.0133	38.26	35.9067	35.6233	35.4533	35.2733	35.6967	36.1233	35.0167	36.2367			34.8767	35.47	34.9933	35.58
3.85	35.2967	38.4067	36.32	35.2	35.91	35.6433	35.03	38.24	35.91	35.6333	35.37	35.33	35.6867	36.3267	35.01	36.26			34.9867	35.4233	34.94	35.5267
3.86667	35.3633	38.3967	36.3333	35.17	35.9033	35.6033	35.06	38.2633	35.9	35.64	35.1533	35.4067	35.64	36.3567	35.0267	36.2567			35.0567	35.4367	34.9167	35.48
3.88333	35.5567	38.3867	36.35	35.1567	35.8767	35.6367	35.0567	38.2533	35.88	35.5933	35.0933	35.47	35.6067	36.3733	34.9833	36.2167			35.0133	35.5067	34.9133	35.4467
3.9	35.8067	38.4333	36.3567	35.17	35.86	35.6967	35.0667	38.2433	35.8533	35.5767	35.1867	35.46	35.65	36.3933	34.94	36.1933			34.9067	35.55	34.93	35.44
3.91667	35.9467	38.4667	36.3633	35.1933	35.87	35.6967	35.0933	38.22	35.8233	35.59	35.3533	35.39	35.66	36.41	34.91	36.1833			34.8933	35.5933	34.96	35.4467
3.93333	36.02	38.3833	36.3267	35.2467	35.8833	35.7633	35.1233	38.19	35.8033	35.58	35.3333	35.4433	35.6567	36.41	34.8967	36.1167			34.8933	35.6033	34.9733	35.4367
3.95	36.1067	38.3067	36.3433	35.2967	35.88	35.82	35.1433	38.1767	35.7967	35.5467	35.1667	35.47	35.6433	36.4	34.88	36.0567			34.8667	35.6367	34.96	35.4867
3.96667	36.1667	38.3	36.37	35.31	35.8467	35.8433	35.1367	38.1633	35.7633	35.54	35.07	35.52	35.6133	36.3667	34.82	36.1033			34.8433	35.69	34.8967	35.5367
3.98333	36.2367	38.3267	36.4133	35.3567	35.8233	35.74	35.1433	38.17	35.7433	35.5233	35.01	35.5633	35.5767	36.3333	34.81	36.14			34.8533	35.6833	34.83	35.5533
4	36.34	38.3633	36.4867	35.46	35.8133	35.63	35.1733	38.1533	35.7367	35.53	35.0433	35.6	35.5667	36.37	34.8	36.19			34.89	35.64	34.7867	35.5967
4.01667	36.42	38.39	36.52	35.5067	35.8267	35.59	35.1833	38.08	35.72	35.53	35.1	35.5733	35.8633	36.4067	34.7967	36.2667			34.9267	35.5633	34.77	35.6233
4.03333	36.4267	38.41	36.5533	35.4933	35.83	35.5733	35.2	38.0667	35.7067	35.47	35.1433	35.4633	36.03	36.3867	34.79	36.3333			35.05	35.5733	34.7833	35.7233
4.05	36.3867	38.41	36.5567	35.4933	35.8	35.5833	35.2233	38.1233	35.69	35.4367	35.2033	35.3933	36.0433	36.2667	34.79	36.3633			35.0633	35.6933	34.79	35.7667
4.06667	36.42	38.3967	36.51	35.5	35.7567	35.5733	35.24	38.12	35.6667	35.42	35.24	35.3333	36.0333	36.1767	34.9167	36.3733			35.03	35.7933	34.8133	35.7633
4.08333	36.4867	38.3867	36.49	35.52	35.7467	35.55	35.28	38.1233	35.6367	35.4533	35.2333	35.1233	36.0633	36.0967	34.9633	36.3467			34.96	35.8533	34.8833	35.7333
4.1	36.4733	38.3733	36.5233	35.5633	35.75	35.48	35.2767	38.11	35.6133	35.58	35.2467	34.8267	36.08	36.0433	34.9533	36.3367			34.9567	35.87	34.9033	35.7367
4.11667	36.4433	38.41	36.5567	35.6033	35.7667	35.35	35.2733	38.0933	35.5967	35.5833	35.2933	34.7967	36.1233	36.0633	34.88	36.3633			34.9667	35.9133	34.8967	35.7233
4.13333	36.4267	38.4367	36.5667	35.5767	35.7467	35.33	35.2733	38.0833	35.6367	35.5567	35.3367	34.9833	36.11	36.1867	34.7867	36.39			34.95	36.0133	34.87	35.69
4.15	36.4433	38.4233	36.52	35.5467	35.7333	35.4267	35.3433	38.1033	35.6433	35.5633	35.37	35.0133	35.9933	36.22	34.7233	36.3867			34.9167	36.1067	34.85	35.6833
4.16667	36.3767	38.3933	36.4367	35.5667	35.7233	35.3633	35.3467	38.15	35.64	35.59	35.4033	34.9767	35.9	36.2667	34.69	36.3467			34.8867	36.17	34.8333	35.6633
4.18333	36.2567	38.38	36.4133	35.5867	35.7267	35.26	35.27	38.1367	35.62	35.6533	35.4433	35.1	35.8633	36.2267	34.6967	36.3167			34.8567	36.19	34.8167	35.6267
4.2	36.2733	38.35	36.46	35.62	35.73	35.1633	35.2367	38.1367	35.62	35.6467	35.47	35.1767	35.8367	36.0933	34.72	36.2733			34.84	36.11	34.78	35.6367
4.21667	36.31	38.2667	36.51	35.6333	35.7267	35.1567	35.2233	38.1367	35.68	35.62	35.49	35.2333	35.9033	35.9967	34.7533	36.2467			34.8633	36.03	34.76	35.6533
4.23333	36.35	38.22	36.5167	35.6033	35.74	35.22	35.2333	38.12	35.67	35.54	35.51	35.3	35.93	35.91	34.7767	36.2433			34.8833	36.0167	34.75	35.7167
4.25	36.3767	38.16	36.51	35.5233	35.7367	35.2267	35.2133	38.03	35.6933	35.4967	35.5133	35.3967	35.9167	35.91	34.78	36.2433			34.9467	36.1267	34.7367	35.7667
4.26667	36.4067	38.14	36.5233	35.46	35.7267	35.2533	35.0733	37.9333	35.7567	35.5133	35.5067	35.4533	35.8867	35.8833	34.8333	36.2467			35.2733	36.2733	34.7333	35.7
4.28333	36.5167	38.1533	36.58	35.3733	35.74	35.4033	34.9067	37.8733	35.8167	35.5633	35.4467	35.4533	35.8833	35.83	34.86	36.2567			35.55	36.2867	34.7433	35.63
4.3	36.7367	38.1633	36.5833	35.3467	35.7667	35.7167	34.9333	37.7967	35.83	35.6633	35.3467	35.5067	35.8667	35.8367	34.8533	36.2567			35.61	36.3467	34.7433	35.5867
4.31667	36.73	38.25	36.5633	35.2767	35.83	35.8167	35.1233	37.7267	35.83	35.75	35.28	35.51	35.8333	35.86	34.84	36.2433			35.5967	36.3833	34.74	35.6833
4.33333	36.67	38.1967	36.5467	35.2467	35.8533	35.8133	35.23	37.7133	35.8967	35.8967	35.2933	35.3633	35.7933	35.85	34.8267	36.1533			35.5233	36.3533	34.73	35.79
4.35	36.5367	38.1633	36.5167	35.2533	35.89	35.75	35.2633	37.7667	35.99	35.96	35.35	35.2833	35.7767	35.8467	34.7967	36.05			35.46	36.3667	34.7367	35.83
4.36667	36.4533	38.09	36.49	35.3667	35.9533	35.67	35.2833	37.9133	35.9767	35.98	35.33	35.2233	35.7933	35.8033	34.7633	36.17			35.43	36.4167	34.7333	35.8333
4.38333	36.4067	38.15	36.4533	35.5167	36	35.65	35.3533	37.8967	35.9	35.97	35.2767	35.22	35.7533	35.84	34.76	36.2167			35.4133	36.3067	34.7633	35.83
4.4	36.3733	38.2133	36.42	35.6033	36.18	35.6	35.58	37.8533	35.8967	35.9367	35.2933	35.2133	35.63	35.8767	34.7833	36.21			35.3967	36.2333	34.82	35.8167
4.41667	36.35	38.2333	36.3867	35.6167	36.2267	35.6267	35.6333	37.91	35.91	35.9	35.3933	35.1933	35.5467	35.9367	34.7867	36.2133			35.36	36.1733	34.84	35.78
4.43333	36.3233	38.33	36.36	35.6533	36.23	35.6467	35.6367	37.9967	35.92	35.89	35.62	35.1767	35.4733	36.0567	34.7933	36.21			35.3567	36.15	34.8733	35.7467
4.45	36.2833	38.375	36.3233	35.7233	36.2667	35.6333	35.6433	38.05	35.94	35.83	35.6833	35.13	35.4633	36.0667	34.78	36.1833			35.3067	36.1467	34.94	35.7067
4.46667	36.2467	38.47	36.2433	35.7533	36.3	35.54	35.6333	38.16	35.9367	35.71	35.7167	35.09	35.45	36.0267	34.7567	36.1567			35.2867	36.14	34.97	35.67
4.48333	36.1967	38.54	36.24	35.75	36.31	35.2433	35.6133	38.2567	35.9467	35.6433	35.7233	35.06	35.4367	36.0167	34.74	36.15			35.3267	36.1733	34.98	35.6633
4.5	36.1433	38.4833	36.28	35.73	36.2733	35.0367	35.58	38.2833	35.9867	35.61	35.7	35.0167	35.4067	36.01	34.7267	36.1367			35.35	36.2133	35.0367	35.6467
4.51667	36.1367	38.5433	36.3933	35.72	36.3133	34.9233	35.5567	38.2933	35.9733	35.5733	35.6667	35.05	35.4333	35.9933	34.7333	36.11			35.3533	36.2	35.0767	35.6267
4.53333	36.2067	38.5667	36.4233	35.7133	36.3467	34.8933	35.51	38.3667	35.94	35.5433	35.5933	35.04	35.4567	35.98	34.74	36.0767			35.3333	36.1467	35.1	35.6133
4.55	36.2233	38.53	36.3967	35.6967	36.4	34.98	35.49	38.3967	35.8733	35.52	35.5267	35.02	35.48	35.9767	34.7433	36.0767			35.29	36.11	35.1167	35.5833
4.56667	36.2167	38.4567	36.35	35.71	36.5	35.11	35.45	38.3833	35.8633	35.4933	35.5833	35.0533	35.5033	35.9833	34.74	36.1033			35.28	36.06	35.16	35.5533
4.58333	36.1733	38.3433	36.3167	35.69	36.5433	35.2367	35.4367	38.3933	35.8367	35.49	35.5667	35.0833	35.5267	35.9767	34.7133	36.1233			35.27	36.0167	35.2333	35.5133
4.6	36.0067	38.3767	36.31	35.6533	36.58	35.2833	35.5	38.3733	35.8433	35.4967	35.5533	35.1133	35.5367	35.9767	34.7467	36.13			35.2833	35.96	35.21	35.46
4.61667	35.9467	38.4967	36.2867	35.6067	36.6633	35.2167	35.49	38.36	35.9033	35.4867	35.5433	35.1467	35.5067	35.9633	34.7733	36.11			35.2533	35.8833	35.1933	35.4267
4.63333	35.9567	38.4967	36.2933	35.5933	36.7033	35.2667	35.3167	38.36	35.91	35.4867	35.54	35.1533	35.4967	35.9533	34.8	36.11			35.2367	35.7967	35.1833	35.4133
4.65	35.9733	38.47	36.2933	35.48	36.7733	35.3067	35.2533	38.36	35.8867	35.48	35.53	35.11	35.5167	35.9367	34.8033	36.1567			35.23	35.7067	35.1433	35.3967
4.66667	35.9533	38.4233	36.2467	35.3567	36.85	35.31	35.2133	38.36	35.8433	35.4633	35.4733	35.0867	35.6033	35.9167	34.8	36.1767			35.2167	35.61	35.09	35.3733
4.68333	35.9067	38.45	36.19	35.4433	36.91	35.2067	35.2567	38.3567	35.8033	35.4467	35.4167	35.09	35.78	35.89	34.73	36.15			35.1933	35.5133	35.0333	35.34
4.7	35.86	38.5633	36.2433	35.6367	36.9133	35.0533	35.3733	38.35	35.7733	35.4067	35.3833	35.1133	35.8533	35.86	34.69	36.1			35.1567	35.4333	34.99	35.3567
4.71667	35.7967	38.5933	36.2667	35.6733	36.92	35.0233	35.38	38.31	35.7533	35.39	35.35	35.12	35.8833	35.84	34.67	36.1033			35.1033	35.4	34.9467	35.44
4.73333	35.7467	38.6133	36.2767	35.6333	36.9233	34.9933	35.3233	38.2367	35.7367	35.3833	35.32	35.0733	35.9133	35.8433	34.68	36.0967			35.0933	35.3367	34.9	35.4467
4.75	35.71	38.6133	36.3033	35.7333	36.9733	34.9667	35.3133	38.1033	35.7133	35.3567	35.2933	34.9233	35.9733	35.84	34.7533	36.09			35.2	35.2667	34.86	35.44
4.76667	35.7067	38.6	36.32	35.7933	36.9733	35.0133	35.31	38.0067	35.6933	35.3033	35.28	34.99	35.9667	35.8233	34.9367	36.0533			35.23	35.19	34.81	35.46
4.78333	35.71	38.5867	36.37	35.83	36.95	35.01	35.2833	38.0033	35.69	35.2467	35.2567	35.0867	35.9833	35.7933	35.03	36.0633			35.2567	35.1233	34.8	35.5167
4.8	35.69	38.58	36.4133	35.9033	36.8867	35.0033	35.2433	38.0667	35.6867	35.22	35.24	35.2667	36.0167	35.79	35.0567	36.0467			35.25	35.0733	34.8033	35.52
4.81667	35.65	38.5867	36.4233	36.0567	36.8267	35.0467	35.14	38.1167	35.6767	35.1967	35.28	35.3267	36.0333	35.87	35.1	36.0367			35.2267	35.0333	34.8667	35.5167
4.83333	35.6167	38.5767	36.43	36.23	36.8133	35.13	35.1367	38.16	35.6667	35.1633	35.2933	35.3367	36.0533	35.86	35.1667	36.04			35.19	34.9867	34.8867	35.5867
4.85	35.6667	38.5733	36.44	36.2567	36.78	35.21	35.1567	38.2267	35.64	35.1367	35.3167	35.3167	36.0867	35.8033	35.22	36.0633			35.1233	34.9533	34.8267	35.6333
4.86667	35.7333	38.57	36.4267	36.3067	36.7333	35.2467	35.1567	38.27	35.6133	35.1133	35.3267	35.2933	36.14	35.6967	35.33	36.13			35.06	34.9167	34.8233	35.66
4.88333	35.76	38.5633	36.44	36.35	36.64	35.2567	35.1667	38.2933	35.59	35.1067	35.35	35.3033	36.1667	35.6833	35.5	36.1533			35.04	34.8833	34.91	35.62
4.9	35.7733	38.54	36.4867	36.3367	36.54	35.2667	35.15	38.3167	35.5567	35.0867	35.3633	35.3033	36.14	35.7033	35.5567	36.15			35.0333	34.8567	34.97	35.5667
4.91667	35.78	38.5267	36.4867	36.2267	36.42	35.2833	35.14	38.3333	35.53	35.09	35.3667	35.28	36.0967	35.71	35.5433	36.1267			35.02	34.8267	34.9633	35.63
4.93333	35.7867	38.5367	36.4733	36.2367	36.3733	35.26	35.1267	38.4267	35.5167	35.12	35.3633	35.3133	36.0733	35.7033	35.48	36.0833			35.0067	34.79	34.9067	35.74
4.95	35.78	38.54	36.4767	36.3833	36.3633	35.22	35.1967	38.4533	35.5233	35.1167	35.3833	35.37	36.0633	35.71	35.3667	36.07			35.05	34.78	34.9133	35.7633
4.96667	35.7633	38.5467	36.46	36.51	36.44	35.1733	35.2233	38.46	35.53	35.12	35.4033	35.3233	36.04	35.7	35.25	36.0433			35.0533	34.7667	35.0267	35.76
4.98333	35.7133	38.54	36.4333	36.45	36.52	35.0733	35.29	38.4267	35.5467	35.21	35.4033	35.12	35.91	35.6733	35.1867	36.03			35.0333	34.75	35.12	35.7433
5	35.7633	38.5233	36.43	36.3867	36.6233	34.97	35.2233	38.4233	35.5667	35.3367	35.4533	35.0333	35.9033	35.66	35.1467	36.0867			35.0133	34.72	35.1433	35.7233
5.01667	35.7567	38.5267	36.4333	36.4033	36.6667	34.9867	35.1467	38.4767	35.6033	35.39	35.45	34.9833	35.87	35.6567	35.1333	36.17			34.9933	34.71	35.1433	35.6767
5.03333	35.7067	38.54	36.4367	36.4067	36.7333	35.1633	35.11	38.47	35.62	35.3467	35.5333	34.9333	35.82	35.6533	35.1767	36.2467			34.9433	34.6933	35.1333	35.6267
5.05	35.6467	38.53	36.4267	36.4267	36.7733	35.22	35.1633	38.4433	35.63	35.3333	35.5533	34.8967	35.77	35.6267	35.1633	36.3667			34.9133	34.6667	35.1	35.6367
5.06667	35.63	38.5033	36.43	36.4033	36.8067	35.21	35.17	38.3833	35.6367	35.3433	35.5533	34.8867	35.6433	35.63	35.1133	36.4433			34.8867	34.6233	35.0633	35.6467
5.08333	35.6667	38.4833	36.4467	36.1567	36.8133	35.17	35.1933	38.34	35.6533	35.35	35.5433	34.9333	35.53	35.6667	35.0633	36.4667			34.8333	34.6067	35.02	35.6167
5.1	35.6567	38.46	36.45	36.1067	36.7767	35.1333	35.15	38.32	35.6667	35.3633	35.5167	35	35.51	35.6833	35.0533	36.47			34.8033	34.6433	34.9767	35.6233
5.11667	35.6567	38.4433	36.4367	36.1067	36.7633	35.0867	35.1667	38.3033	35.65	35.3767	35.4567	35.0167	35.52	35.6933	35.0267	36.4567			34.7867	34.6667	34.9267	35.66
5.13333	35.6433	38.4367	36.42	36.3733	36.7633	35.0233	35.17	38.3033	35.6533	35.3633	35.3233	35.0033	35.54	35.7	35.0133	36.4167			34.7733	34.6633	34.8733	35.65
5.15	35.5933	38.4333	36.3667	36.4033	36.74	35.0567	35.1967	38.32	35.69	35.3467	35.2333	34.97	35.5733	35.7333	34.96	36.3967			34.7633	34.67	34.8233	35.63
5.16667	35.46	38.4267	36.32	36.4067	36.6833	35.1033	35.3333	38.3	35.7433	35.3067	35.21	34.9533	35.54	35.81	34.9	36.3467			34.7433	34.67	34.8133	35.5967
5.18333	35.42	38.4333	36.27	36.4	36.6167	35.1467	35.4967	38.33	35.75	35.22	35.36	34.97	35.49	35.8	34.8833	36.32			34.69	34.67	34.8133	35.5567
5.2	35.44	38.4333	36.23	36.26	36.5633	35.1733	35.4733	38.3833	35.7867	35.16	35.38	34.9567	35.4467	35.72	34.8667	36.32			34.6767	34.68	34.8	35.5267
5.21667	35.4	38.4067	36.2067	36.2	36.5233	35.2433	35.55	38.3767	35.82	35.15	35.4167	34.9433	35.4333	35.7567	34.86	36.32			34.68	34.68	34.8033	35.5267
5.23333	35.4633	38.38	36.18	36.2267	36.48	35.3	35.8267	38.33	35.87	35.13	35.4067	34.97	35.5033	35.7833	34.8333	36.38			34.68	34.6767	34.8067	35.53
5.25	35.57	38.3533	36.1767	36.24	36.5	35.2867	35.9033	38.4167	35.8733	35.1333	35.3833	34.92	35.5767	35.73	34.79	36.4067			34.7633	34.68	34.82	35.52
5.26667	35.7733	38.36	36.1867	36.23	36.5433	35.2	35.94	38.4767	35.83	35.2133	35.3067	34.86	35.5733	35.7	34.77	36.4067			34.89	34.6733	34.8267	35.5
5.28333	35.85	38.3567	36.2067	36.1967	36.5833	35.25	36.0533	38.4833	35.8067	35.3	35.2567	34.92	35.6	35.7	34.7167	36.3833			34.9267	34.66	34.83	35.4633
5.3	35.8633	38.3467	36.2267	36.1567	36.5233	35.3333	36.1733	38.4733	35.81	35.27	35.3	35.1	35.6167	35.69	34.6767	36.37			34.8467	34.6233	34.8267	35.4433
5.31667	35.8633	38.2733	36.2333	36.0033	36.4433	35.2833	36.2	38.4667	35.81	35.24	35.4033	35.0433	35.6233	35.6633	34.71	36.35			34.8167	34.6167	34.82	35.45
5.33333	35.84	38.23	36.2367	35.9767	36.37	35.25	36.1133	38.4433	35.8	35.22	35.5633	34.9933	35.6367	35.69	34.7933	36.3367			34.81	34.62	34.8067	35.4733
5.35	35.7933	38.2	36.2433	36.0933	36.26	35.2533	36.1033	38.4167	35.88	35.16	35.5733	34.98	35.61	35.79	34.8167	36.3433			34.8433	34.6033	34.7967	35.4733
5.36667	35.71	38.2567	36.2467	36.06	36.1767	35.2267	36.0733	38.3933	35.9267	35.1233	35.5833	34.99	35.58	35.8333	34.8067	36.3833			34.89	34.59	34.7867	35.46
5.38333	35.7033	38.3867	36.2433	35.9433	36.14	35.0967	36.06	38.39	35.92	35.0667	35.5833	35.0067	35.57	35.8867	34.7967	36.38			34.8833	34.5767	34.77	35.4533
5.4	35.74	38.4567	36.2367	35.9233	36.13	35.0967	36.1067	38.4233	35.87	35.02	35.58	35.0167	35.58	35.88	34.7933	36.3067			34.9167	34.57	34.7533	35.4167
5.41667	35.81	38.46	36.23	35.7467	36.1567	35.0833	36.1133	38.4267	35.8033	35.02	35.6067	35.0367	35.5867	35.84	34.96	36.19			34.9533	34.5733	34.75	35.3833
5.43333	35.8433	38.4533	36.2467	35.6867	36.1833	35.0967	36.14	38.4367	35.8433	35.1167	35.6333	35.1	35.5633	35.78	35.0267	36.0267			34.9367	34.5767	34.7333	35.3333
5.45	35.8667	38.49	36.2767	35.7733	36.1833	35.1133	36.22	38.45	35.86	35.17	35.6133	35.1467	35.5667	35.7467	34.93	35.9933			34.9433	34.5767	34.7033	35.29
5.46667	35.8767	38.5133	36.29	35.9767	36.1533	35.13	36.2433	38.46	35.89	35.1033	35.6	35.1767	35.6233	35.7333	34.8333	36.11			34.8867	34.58	34.6867	35.25
5.48333	35.8933	38.4733	36.28	36.1267	36.11	35.13	36.3	38.4467	35.9267	35.0167	35.7233	35.1967	35.6367	35.7367	34.8933	36.15			34.8633	34.5933	34.76	35.2267
5.5	35.8767	38.41	36.2667	36.1667	36.07	35.1233	36.2833	38.39	35.9433	35.0367	35.7633	35.23	35.64	35.7433	34.9267	36.1567			34.8867	34.6367	34.8133	35.2267
5.51667	35.83	38.33	36.2633	36.1533	36.0033	35.1433	36.1833	38.3167	35.9733	35.25	35.74	35.26	35.6567	35.7333	34.9767	36.1367			34.9467	34.6767	34.92	35.2233
5.53333	35.7633	38.3033	36.2533	36.1733	35.9733	35.1467	36.12	38.2567	35.9967	35.4033	35.71	35.2167	35.6733	35.7533	34.97	36.0933			35.0367	34.69	34.9867	35.2033
5.55	35.71	38.2333	36.24	36.1733	35.9567	35.1367	36	38.1767	36.03	35.47	35.66	35.1867	35.67	35.7867	34.9667	36.05			34.99	34.72	34.9933	35.1733
5.56667	35.6567	38.1167	36.2233	36.13	35.9267	35.1367	36.01	38.1267	36.04	35.4767	35.5933	35.12	35.6933	35.7867	34.9533	36			34.9467	34.74	34.9633	35.1767
5.58333	35.65	38.1333	36.2133	36.1067	35.8967	35.14	36.0133	38.1	36.0067	35.4533	35.53	34.9067	35.69	35.69	34.97	35.96			34.8567	34.74	34.9767	35.1567
5.6	35.6333	38.24	36.2267	36.0933	35.89	35.1367	35.9967	38.09	35.8767	35.44	35.4633	34.7967	35.6467	35.65	34.9233	35.92			34.6967	34.7367	34.9767	35.1467
5.61667	35.6	38.2933	36.26	36.08	35.88	35.1667	35.9833	38.08	35.8167	35.43	35.4967	34.7933	35.5933	35.67	34.8633	35.9033			34.6533	34.74	34.9533	35.15
5.63333	35.5967	38.36	36.27	36.1233	35.8733	35.2633	35.9333	38.0767	35.8867	35.4067	35.6033	34.7633	35.5567	35.7067	34.84	35.8967			34.6233	34.7933	34.9567	35.1367
5.65	35.6733	38.4633	36.28	36.16	35.8633	35.3167	35.9033	38.0867	36.06	35.39	35.64	34.6667	35.5133	35.71	34.8333	35.8967			34.7167	34.8133	35.0333	35.09
5.66667	35.7333	38.51	36.2633	36.1067	35.8533	35.3367	35.8367	38.16	36.2133	35.3467	35.6567	34.55	35.4433	35.6933	34.83	36.0133			34.9033	34.8433	35.0867	35.0567
5.68333	35.7533	38.5567	36.2533	36.0667	35.85	35.38	35.81	38.2267	36.22	35.29	35.6467	34.6333	35.39	35.6667	34.8	36.05			35.1533	34.8733	35.12	35.0533
5.7	35.7467	38.5833	36.2367	36.0667	35.9067	35.42	35.8267	38.2533	36.1367	35.2567	35.6233	34.7933	35.36	35.6333	34.8167	36.0767			35.1967	34.9067	35.16	35.04
5.71667	35.7367	38.5967	36.1567	36.0733	35.9267	35.3967	35.8	38.26	36.0833	35.2267	35.61	34.9933	35.4	35.6033	34.87	36.1233			35.2633	34.9567	35.25	35.0367
5.73333	35.71	38.6133	36.2467	36.0467	35.95	35.4167	35.7333	38.2767	36.1333	35.2	35.5867	35.0733	35.4533	35.63	34.92	36.0967			35.31	34.99	35.3	35.0833
5.75	35.67	38.62	36.32	35.9967	35.97	35.4067	35.7433	38.35	36.2233	35.1867	35.5667	35.0833	35.47	35.7533	34.9233	36.05			35.3233	34.9867	35.31	35.0867
5.76667	35.6533	38.6267	36.3633	35.98	35.9767	35.3833	35.7333	38.4233	36.2633	35.1933	35.4967	34.99	35.46	35.81	34.9167	35.9967			35.5167	34.94	35.31	35.0267
5.78333	35.66	38.6267	36.4033	36.02	35.98	35.4267	35.72	38.46	36.24	35.2133	35.4433	34.9167	35.4333	35.8367	34.9267	35.97			35.55	34.9267	35.3033	35.01
5.8	35.6133	38.61	36.4833	36.1233	35.9733	35.3867	35.6933	38.4933	36.2567	35.21	35.38	34.8333	35.4167	35.8433	35.0267	35.95			35.4633	34.86	35.2733	35.0167
5.81667	35.6233	38.5967	36.5033	36.2533	35.9567	35.3733	35.65	38.5233	36.3167	35.1933	35.3367	34.81	35.49	35.8233	35.1133	35.92			35.4633	34.8133	35.22	35.0533
5.83333	35.6533	38.5833	36.4967	36.37	35.94	35.41	35.6033	38.53	36.33	35.17	35.3433	34.8233	35.58	35.7967	35.0433	35.9167			35.4333	34.82	35.1967	35.0967
5.85	35.65	38.5833	36.4833	36.4033	35.9	35.41	35.5633	38.5333	36.32	35.1533	35.3733	34.85	35.6067	35.78	35.03	35.92			35.43	34.8133	35.16	35.11
5.86667	35.5967	38.5967	36.47	36.4467	35.89	35.4333	35.4867	38.5467	36.2933	35.1533	35.37	34.9333	35.6033	35.92	35.1067	35.9033			35.54	34.8033	35.1033	35.1533
5.88333	35.6433	38.6067	36.46	36.4933	35.9133	35.59	35.4033	38.54	36.2567	35.19	35.37	35.1033	35.5833	36.0467	35.13	35.92			35.5767	34.7933	35.1033	35.2367
5.9	35.6867	38.6067	36.4333	36.3733	35.92	35.6967	35.4233	38.5133	36.2167	35.23	35.3667	35.1433	35.6167	36.0833	35.0967	35.9333			35.5433	34.8533	35.08	35.3
5.91667	35.6367	38.6167	36.41	36.25	35.9067	35.7033	35.48	38.4467	36.18	35.2833	35.3667	35.3067	35.65	36.0933	35.03	35.94			35.54	34.94	35.0433	35.3233
5.93333	35.5467	38.6733	36.36	36.18	35.89	35.6433	35.5033	38.4033	36.1367	35.28	35.3667	35.3367	35.6533	36.1533	34.8533	35.94			35.53	34.9933	35.05	35.31
5.95	35.4567	38.6933	36.3433	36.1533	35.9667	35.62	35.4933	38.4	36.09	35.29	35.36	35.2567	35.6667	36.2	34.7667	35.9367			35.5133	34.9733	35.07	35.26
5.96667	35.5833	38.6833	36.3433	36.18	35.9833	35.59	35.4733	38.3967	36.0733	35.4067	35.3467	35.11	35.64	36.2633	34.7433	35.94			35.4767	34.9767	35.1167	35.1767
5.98333	35.6667	38.6533	36.3433	36.1533	35.9667	35.58	35.45	38.39	36.1	35.4333	35.3467	35.0733	35.5833	36.2867	34.73	35.9467			35.4133	35.0033	35.1233	35.1333
6	35.7033	38.62	36.3467	36.05	35.9533	35.5667	35.43	38.3567	36.0933	35.43	35.3033	35.08	35.5467	36.28	34.71	35.9567			35.43	35.0167	35.0767	35.1167

## Sheet: Tg(Avil-CreERT2) Cap
Time	Trpv1fl/fl-Cap					Trpv1fl/fl-Veh					Tg(Avil-CreERT2); Trpv1fl/fl-Cap					Tg(Avil-CreERT2); Trpv1fl/fl-Veh
	U013	U015	U345	U747	U016	U013	U015	U345	U747	U016	U011	U012	U343			U011	U012	U343
-1	34.54	35	35.75	35.23	35.73	33.47	35.42	35.05	34.05	36.98	33.15	35.01	35.63			34.47	34.02	35.15
-0.983333	34.7	35	35.71	35.23	35.79	33.45	35.31	35.06	34.01	36.94	33.12	34.92	35.46			34.4	34.12	35.22
-0.966667	34.86	34.99	35.67	35.2	35.82	33.4	35.22	35.08	33.99	36.88	33.12	35	35.34			34.35	34.18	35.21
-0.95	34.98	34.94	35.59	35.12	35.81	33.39	35.17	35.08	33.97	36.86	33.28	35.03	35.25			34.3	34.18	35.16
-0.933333	35.07	34.91	35.53	35.01	35.75	33.37	35.09	35.06	33.97	36.9	33.35	35.09	35.2			34.26	34.17	35.22
-0.916667	35.09	34.92	35.49	34.89	35.75	33.4	35.04	35.02	33.99	36.93	33.52	35.22	35.17			34.22	34.08	35.31
-0.9	35.07	34.97	35.44	34.79	35.75	33.46	34.97	35	34.02	36.94	33.57	35.25	35.14			34.16	33.97	35.41
-0.883333	35.02	34.97	35.43	34.73	35.75	33.57	34.73	34.96	34.03	36.96	33.54	35.07	35.11			34.1	34.08	35.57
-0.866667	34.95	34.95	35.43	34.68	35.78	33.63	34.59	34.91	34.1	37	33.54	35.11	35.1			34.05	34.14	35.65
-0.85	34.85	34.95	35.41	34.65	35.8	33.68	34.51	34.88	34.37	37	33.59	35.39	35.09			33.97	34.11	35.62
-0.833333	34.76	34.94	35.42	34.64	35.79	33.67	34.43	34.87	34.61	37.01	33.72	35.34	35.06			33.93	33.91	35.59
-0.816667	34.65	34.94	35.44	34.6	35.74	33.72	34.38	34.87	34.76	37.04	33.75	35.22	35.03			33.9	33.73	35.46
-0.8	34.51	34.9	35.43	34.57	35.84	33.85	34.52	34.89	34.85	37.03	33.5	35.21	35.01			33.89	33.75	35.39
-0.783333	34.4	34.8	35.42	34.53	35.9	33.92	34.56	34.96	34.91	36.99	33.46	35.23	35			33.84	33.86	35.4
-0.766667	34.33	34.64	35.39	34.51	36.02	33.86	34.58	35.04	34.93	36.95	33.44	35.15	35.01			33.81	33.99	35.34
-0.75	34.27	34.57	35.35	34.56	36.21	33.8	34.58	35.06	34.91	36.94	33.33	34.92	35.05			33.8	34.04	35.28
-0.733333	34.21	34.57	35.3	34.53	36.26	33.77	34.59	35.08	34.86	36.95	33.25	34.88	35.06			33.97	34.08	35.33
-0.716667	34.16	34.58	35.28	34.39	36.21	33.69	34.62	35.08	34.78	36.99	33.31	34.91	35.06			33.97	34.09	35.37
-0.7	34.12	34.64	35.29	34.15	36.1	33.53	34.63	35.05	34.72	37	33.44	34.99	35.04			33.82	34.15	35.42
-0.683333	34.14	34.77	35.29	34.12	36.02	33.57	34.68	35.05	34.69	37.01	33.49	34.96	35.01			33.77	34.33	35.51
-0.666667	34.14	34.83	35.26	34.15	36	33.7	34.76	35.07	34.65	37.03	33.58	34.88	34.99			33.73	34.42	35.62
-0.65	34.09	34.97	35.24	34.14	35.98	33.84	34.77	35.06	34.63	37.05	33.7	34.89	34.99			33.66	34.48	35.65
-0.633333	34.05	35.07	35.24	34.07	35.98	33.98	34.74	35.03	34.55	37.06	33.75	34.88	34.98			33.69	34.56	35.65
-0.616667	34.08	35.16	35.24	33.99	35.97	34.1	34.68	35.01	34.49	37.05	33.83	34.77	34.98			33.73	34.6	35.75
-0.6	34.11	35.17	35.23	33.91	35.97	34.06	34.62	34.99	34.41	37.02	33.84	34.83	34.98			33.73	34.67	35.95
-0.583333	34.12	35.13	35.21	33.87	35.95	33.92	34.57	34.96	34.36	36.98	33.9	34.98	34.97			33.67	34.87	36.3
-0.566667	34.11	35.05	35.18	33.83	35.91	33.96	34.54	34.95	34.31	36.94	34.02	35.03	34.97			33.64	34.97	36.69
-0.55	34.12	34.95	35.15	33.77	35.84	34.07	34.56	34.92	34.27	36.87	34.08	35.04	34.96			33.58	34.97	36.8
-0.533333	34.13	35.04	35.13	33.76	35.78	34.1	34.8	34.83	34.26	36.81	34.15	35.06	34.96			33.57	34.92	36.98
-0.516667	34.04	35.13	35.11	33.92	35.77	34.16	35	34.72	34.33	36.77	34.38	35.13	34.94			33.62	34.98	37.03
-0.5	33.89	35.17	35.14	33.93	35.74	34.21	35.25	34.57	34.38	36.77	34.53	35.16	34.92			33.67	35.42	37.09
-0.483333	33.88	35.19	35.16	33.79	35.72	34.22	35.31	34.89	34.44	36.8	34.65	35.1	34.91			33.7	35.62	37.09
-0.466667	33.88	35.29	35.17	33.78	35.86	34.21	35.33	35.29	34.48	36.81	34.72	34.97	34.89			33.73	35.7	37
-0.45	33.87	35.37	35.16	33.8	36.04	34.18	35.33	35.3	34.5	36.8	34.71	34.96	35.02			33.85	35.77	37.02
-0.433333	33.84	35.45	35.15	33.79	36.07	34.13	35.33	35.24	34.49	36.79	34.71	34.97	35.06			33.94	35.86	37.05
-0.416667	33.82	35.58	35.12	33.76	36.11	34.05	35.31	35.25	34.49	36.78	34.7	35.39	35.52			33.88	35.91	37.06
-0.4	33.78	35.71	35.07	33.73	36.17	33.99	35.27	35.26	34.49	36.78	34.66	35.55	35.74			33.78	35.91	37.06
-0.383333	33.71	35.73	35	33.72	35.87	34	35.19	35.22	34.44	36.78	34.63	35.55	35.8			33.73	35.86	36.96
-0.366667	33.65	35.75	34.92	33.73	35.69	34.07	35.15	35.22	34.41	36.79	34.59	35.62	35.82			33.6	35.76	36.8
-0.35	33.6	35.75	34.84	33.74	35.73	34.08	35.2	35.22	34.41	36.8	34.54	35.81	35.8			33.54	35.65	36.66
-0.333333	33.58	35.76	34.81	33.74	35.82	34.06	35.23	35.18	34.42	36.78	34.49	35.93	35.77			33.52	35.55	36.57
-0.316667	33.58	35.82	34.8	33.74	35.96	34.03	35.23	35.15	34.44	36.75	34.44	36	35.76			33.5	35.43	36.47
-0.3	33.56	35.87	34.87	33.73	35.98	33.99	35.22	35.12	34.44	36.72	34.4	36.01	35.76			33.44	35.31	36.35
-0.283333	33.55	35.9	35.07	33.71	35.96	33.98	35.2	35.05	34.42	36.69	34.35	35.99	35.77			33.49	35.21	36.24
-0.266667	33.54	36	35.18	33.7	35.89	33.96	34.94	35.02	34.45	36.64	34.3	35.94	35.78			33.58	35.1	36.13
-0.25	33.54	36	35.13	33.69	35.79	33.91	34.73	35.01	34.49	36.61	34.21	35.88	35.78			33.58	34.97	36.03
-0.233333	33.55	36.03	35.14	33.68	35.63	33.85	34.68	34.98	34.49	36.59	34.15	35.81	35.78			33.55	34.85	35.94
-0.216667	33.57	36.11	35.21	33.66	35.5	33.8	34.64	34.95	34.48	36.56	34.16	35.72	35.79			33.52	34.71	35.85
-0.2	33.61	36.1	35.35	33.7	35.44	33.78	34.62	34.92	34.43	36.56	34.41	35.57	35.8			33.5	34.55	35.81
-0.183333	33.63	36.05	35.56	33.97	35.46	33.78	34.61	34.92	34.26	36.57	34.56	35.43	35.8			33.48	34.43	35.77
-0.166667	33.64	36.01	35.59	34.17	35.5	33.77	34.6	34.92	34.23	36.57	34.65	35.32	35.79			33.46	34.33	35.72
-0.15	33.65	35.95	35.57	34.24	35.46	33.75	34.67	34.93	34.29	36.55	34.68	35.24	35.75			33.45	34.4	35.56
-0.133333	33.64	35.98	35.66	34.34	35.36	33.71	34.98	34.94	34.31	36.49	34.7	35.17	35.72			33.44	34.49	35.51
-0.116667	33.63	36.07	35.86	34.41	35.41	33.67	35.01	34.99	34.29	36.46	34.71	35.09	35.71			33.42	34.51	35.48
-0.1	33.68	36.13	35.88	34.41	35.42	33.67	34.64	35.05	34.28	36.54	34.73	35.03	35.7			33.39	34.5	35.44
-0.0833333	33.81	36.12	35.87	34.4	35.36	33.69	34.41	35.08	34.25	36.56	34.72	35.01	35.72			33.41	34.44	35.38
-0.0666667	33.89	36.05	35.87	34.3	35.39	33.78	34.38	35.11	34.23	36.57	34.71	34.96	35.76			33.65	34.34	35.33
-0.05	33.94	35.97	35.79	33.92	35.39	33.87	34.39	35.12	34.22	36.71	34.67	34.92	35.81			33.77	34.28	35.3
-0.0333333	33.95	35.91	35.77	33.92	35.37	33.91	34.52	35.13	34.23	36.74	34.63	34.87	35.84			33.9	34.23	35.28
-0.0166667	33.92	35.9	35.73	34.17	35.38	33.93	34.75	35.12	34.24	36.72	34.63	34.81	35.78			33.98	34.23	35.24
0	33.89	35.87	35.82	34.4	35.39	33.95	34.99	35.11	34.24	36.69	34.63	34.74	35.71			33.96	34.24	35.21
0.0166667	33.86	35.82	36.18	34.29	35.38	33.96	34.96	35.09	33.86	36.67	34.63	34.65	35.69			33.9	34.27	35.19
0.0333333	33.98	35.95	36.18	32.71	35.21	34.01	34.93	35.06	28.85	35.95	33.96	34.59	35.22			33.39	34.31	35.17
0.05	34.25	36.15	35.84	33.82	35.02	34.11	34.91	35.08	32.73	35.54	33.35	34.55	28.23			33.16	33.8	34.35
0.0666667	34.38	36.39	35.84	33.72	34.92	34.12	34.76	35.06	32.74	35.59	33.05	33.6	33.69			32.91	33.13	33.77
0.0833333	34.43	36.49	35.89	33.34	34.7	33.56	34.89	35.01	32.5	35.78	32.63	33.46	34.51			32.86	33.03	34.28
0.1	33.62	36.5	35.85	33.39	34.47	33.02	34.77	34.6	32.1	36.01	32.4	33.35	34.32			32.9	33.18	34.28
0.116667	33.17	36.06	35.4	33.59	34.29	32.95	34.42	34.39	31.85	36.21	32.33	33.54	34.11			33.23	33.41	34.34
0.133333	32.32	35.89	35.2	33.5	33.93	32.99	34.35	34.33	31.68	36.45	32.47	33.62	33.98			33.83	33.77	34.28
0.15	31.63	35.83	34.99	33.47	33.7	32.95	34.32	34.29	31.84	36.87	32.6	33.75	33.97			34.12	33.99	34.28
0.166667	31.52	35.84	34.59	33.35	33.59	32.97	34.33	34.18	31.95	37.21	32.74	34.1	33.99			34.11	34.06	34.32
0.183333	31.58	36.06	34.29	33.13	33.56	32.97	34.56	33.89	31.98	37.42	32.78	34.34	33.93			33.91	34.1	34.3
0.2	31.4	36.04	34.01	32.76	33.81	32.97	34.65	33.88	32.11	37.51	32.74	34.47	33.81			34.09	34.08	34.4
0.216667	30.94	35.81	33.72	32.23	34.07	32.99	34.63	34.14	32.35	37.59	32.61	34.49	33.97			34.36	34.05	34.4
0.233333	30.68	35.71	33.41	31.69	34.09	32.94	34.57	34.14	32.4	37.63	32.62	34.5	34			34.69	34.16	34.08
0.25	30.46	35.59	33.12	31.51	33.98	33.19	34.56	33.97	32.4	37.68	32.78	34.55	33.96			34.8	34.3	33.99
0.266667	30.4	35.36	32.96	31.46	33.76	33.94	35.09	33.87	32.42	37.65	33.03	34.64	33.97			34.85	34.36	34.09
0.283333	30.42	34.91	32.73	31.44	33.6	34.28	35.26	33.89	32.51	37.54	33.51	34.68	33.97			34.8	34.38	34.23
0.3	30.3	34.68	32.48	31.42	33.44	34.45	35.32	33.98	32.8	37.72	33.73	34.65	34			34.66	34.43	34.61
0.316667	30.07	34.46	32.3	31.42	33.34	34.52	35.45	34.05	33.01	37.89	33.84	34.56	34.12			34.53	34.55	34.51
0.333333	29.96	34.25	32.13	31.41	33.27	34.24	35.56	34.18	33.02	37.86	34.03	34.51	34.26			34.4	34.7	34.34
0.35	29.88	34.07	31.95	31.38	33.21	34.1	35.62	34.28	33.07	37.8	34.11	34.51	34.31			34.41	34.93	34.38
0.366667	29.8	33.78	31.83	31.31	33.14	34.53	35.54	34.38	33.16	37.74	34.14	34.49	34.24			34.8	35	34.38
0.383333	29.77	33.51	31.72	31.26	33.09	34.56	35.48	34.48	33.29	37.67	34.1	34.48	34.11			35.1	35.08	34
0.4	29.71	33.23	31.58	31.19	33.05	34.59	35.34	34.54	33.59	37.66	33.96	34.45	34.06			35.16	35.11	33.68
0.416667	29.58	33.19	31.43	31.03	33	34.84	35.33	34.71	33.82	37.61	33.83	34.43	33.99			34.94	34.84	33.5
0.433333	29.45	33.21	31.38	30.86	32.95	34.93	35.41	34.76	33.94	37.81	33.77	34.41	33.85			34.84	34.3	33.36
0.45	29.41	33.19	31.39	30.87	32.91	34.94	35.45	34.69	34	38.06	33.73	34.26	33.76			35.11	34.09	33.14
0.466667	29.31	33.17	31.31	31.23	32.92	34.91	35.48	34.51	34.03	38.07	33.68	34.15	33.72			35.4	34.09	33.15
0.483333	29.17	33.17	31.15	31	32.95	34.73	35.46	34.4	34.15	38	33.65	34.18	33.76			35.49	34.23	33.17
0.5	29.04	33.14	31.07	30.65	32.99	34.26	35.49	34.37	34.39	38	33.53	34.11	33.85			35.46	34.31	32.93
0.516667	28.91	33.12	31.1	30.49	33	34.16	35.63	34.35	34.41	38.02	33.45	34.02	33.93			35.3	34.26	32.73
0.533333	28.78	33.12	31.18	30.48	33	34.08	35.63	34.36	34.34	38.06	33.31	33.95	33.94			35.01	34.23	32.61
0.55	28.72	33.14	31.22	30.7	33.08	34.06	35.59	34.4	34.32	38.01	33.31	33.94	33.94			34.88	34.14	32.42
0.566667	28.63	33.17	31.21	30.79	33.17	34.08	35.6	34.41	34.35	37.95	33.28	34	34.15			34.8	33.95	32.21
0.583333	28.51	33.24	31.04	30.72	33.24	34.14	35.7	34.41	34.35	38.02	33.25	34.04	34.29			34.91	34.18	31.97
0.6	28.43	33.28	31.06	30.37	33.13	34.15	35.69	34.4	34.22	38.03	33.39	34	34.32			35.01	34.34	31.84
0.616667	28.38	33.32	31.11	30.06	33.02	34.35	35.41	34.42	34.18	37.98	33.48	33.9	34.25			35.07	34.41	31.73
0.633333	28.29	33.37	31.2	30.01	32.97	34.64	35.43	34.73	34.35	37.89	33.55	33.93	34.24			35.04	34.55	31.72
0.65	28.22	33.43	31.28	30	32.95	34.8	35.89	34.76	34.34	37.86	33.6	33.94	34.2			34.87	34.64	31.73
0.666667	28.16	33.47	31.4	30.02	32.93	34.78	35.98	34.6	34.03	37.88	33.66	33.97	34.24			34.73	34.71	31.76
0.683333	28.14	33.52	31.58	30.03	33.04	34.65	35.99	34.57	34.08	37.83	33.82	34.03	34.33			34.71	34.78	31.77
0.7	28.09	33.52	31.64	30.15	33.12	34.67	35.99	34.57	34.09	37.63	34.05	34.01	34.35			34.68	34.8	31.72
0.716667	28.03	33.34	31.63	30.16	33.13	34.69	35.99	34.75	34	37.57	34.25	33.84	34.48			34.61	34.83	31.68
0.733333	27.96	33.27	31.58	30	33.09	34.7	35.99	34.93	33.86	37.53	34.32	33.73	34.83			34.62	34.85	32
0.75	27.94	33.25	31.46	29.87	33.15	34.72	35.96	34.96	33.69	37.61	34.48	33.76	35.06			34.52	34.86	32.06
0.766667	27.94	33.21	31.51	29.64	33.51	34.73	35.91	35.01	33.66	37.6	34.65	33.88	35.2			33.97	34.86	31.84
0.783333	27.95	33.13	31.66	29.64	33.46	34.73	35.86	35.11	33.81	37.38	34.79	34.1	35.22			33.76	34.85	31.86
0.8	27.99	33.02	31.72	29.64	33.28	34.71	35.82	35.14	34.14	37.29	34.87	34.15	35.15			33.84	34.92	31.92
0.816667	28.02	33	31.81	29.65	33.31	34.64	35.8	35.04	34.5	37.25	34.81	34.22	35.18			34.06	34.92	31.93
0.833333	27.95	33	31.82	29.67	33.41	34.61	35.91	34.65	34.42	37.27	34.6	34.23	35.19			34.26	34.75	31.87
0.85	27.91	33	31.89	29.67	33.5	34.55	35.94	34.57	33.89	37.34	34.42	34.22	35.04			34.37	34.72	31.79
0.866667	27.92	33.04	32.04	29.68	33.58	34.53	35.97	34.57	33.89	37.22	34.24	34.37	35.06			34.22	34.73	31.65
0.883333	27.93	33.09	32.2	29.66	33.7	34.74	36	34.54	34.02	36.96	34.22	34.54	35.15			34.32	34.78	31.61
0.9	27.95	33.11	32.43	29.57	33.79	34.94	35.99	34.52	33.99	36.71	34.34	34.64	35.3			34.51	34.78	31.48
0.916667	27.95	33.03	32.59	29.52	33.8	35.06	35.86	34.46	33.84	36.5	34.55	34.75	35.44			34.58	34.79	31.21
0.933333	27.95	32.94	32.69	29.48	33.77	35.1	35.6	34.48	33.95	36.56	34.66	34.78	35.47			34.63	34.8	31.1
0.95	27.95	33.14	32.7	29.48	33.73	35.11	35.49	34.57	34.12	36.62	34.84	34.81	35.64			34.64	34.73	31.06
0.966667	28.03	33.16	32.74	29.52	33.68	35.05	35.45	34.69	34.06	36.67	34.99	34.91	35.72			34.63	34.73	31.06
0.983333	28.2	33.17	32.86	29.69	33.71	34.81	35.44	34.61	34.07	36.78	34.98	34.87	35.75			34.62	34.8	31.05
1	28.34	33.21	32.92	29.98	33.77	34.52	35.42	34.5	34.35	36.8	34.97	34.7	35.61			34.58	34.98	31.03
1.01667	28.4	33.23	33.04	30.12	33.89	34.36	35.42	34.49	34.52	36.76	35.13	34.63	35.91			34.54	35.1	31.02
1.03333	28.34	33.25	33.21	29.97	34.04	34.26	35.44	34.53	34.73	36.73	35.23	34.58	36.2			34.5	35.13	31.07
1.05	28.28	33.28	33.31	29.47	34.17	34.35	35.48	34.83	34.81	36.73	35.29	34.63	36.21			34.4	35.14	31.17
1.06667	28.28	33.34	33.38	29.25	34.27	34.56	35.47	35.31	34.68	36.73	35.35	34.63	36.18			34.34	35.12	31.19
1.08333	28.27	33.35	33.44	29.24	34.38	34.53	35.44	35.41	34.41	36.78	35.37	34.61	36.16			34.2	35.07	31.18
1.1	28.27	33.31	33.53	29.52	34.48	34.48	35.29	35.41	34.45	36.78	35.37	34.46	36.15			34.07	34.99	31.16
1.11667	28.28	33.36	33.64	29.98	34.58	34.42	35.03	35.52	34.59	36.68	35.33	34.3	36.2			34.06	34.85	31.14
1.13333	28.48	33.57	33.74	30.2	34.56	34.41	34.97	35.77	34.65	36.64	35.14	34.33	36.36			34.06	34.67	31.15
1.15	28.58	33.64	33.82	30.43	34.14	34.47	34.97	35.8	34.67	36.62	35	34.33	36.48			34.1	34.63	31.15
1.16667	28.62	33.63	33.88	30.51	33.85	34.28	35.05	35.78	34.84	36.6	34.99	34.16	36.46			34.13	34.63	31.17
1.18333	28.62	33.5	34.04	30.65	33.78	34.15	35.03	35.73	34.82	36.52	35.02	33.97	36.21			34.17	34.63	31.19
1.2	28.65	33.43	34.13	30.8	33.85	34.2	35.24	35.69	34.58	36.51	35.03	33.8	36.06			34.37	34.66	31.22
1.21667	28.67	33.61	34.12	30.92	34.03	34.66	35.37	35.65	34.51	36.5	35.03	34.08	35.96			34.45	34.79	31.22
1.23333	28.67	33.87	34.14	30.97	34.19	34.94	35.17	35.6	34.51	36.49	35.02	34.29	35.96			34.47	34.9	31.18
1.25	28.72	34.03	34.22	31.06	34.32	35.04	35.1	35.59	34.43	36.48	34.99	34.42	36.16			34.47	34.91	31.18
1.26667	28.76	34.15	34.24	31.16	34.31	35.07	35.24	35.6	34.38	36.44	34.96	34.44	36.34			34.46	34.87	31.22
1.28333	28.77	34.25	34.24	31.22	34.18	35.07	35.33	35.6	34.48	36.36	34.95	34.27	36.36			34.46	34.81	31.27
1.3	28.8	34.31	34.27	31.16	34.27	35.07	35.27	35.61	34.55	36.28	34.89	34.06	36.23			34.45	34.92	31.28
1.31667	28.82	34.32	34.24	31.16	34.33	35.1	35.24	35.62	34.59	36.24	34.82	33.97	36.12			34.44	35.19	31.29
1.33333	28.85	34.36	34.21	31.64	34.57	35.25	35.34	35.61	34.59	36.46	34.75	33.88	36.1			34.38	35.19	31.33
1.35	28.9	34.35	34.24	31.7	34.77	35.29	35.54	35.59	34.58	36.57	34.7	34.05	36.08			34.23	34.92	31.39
1.36667	28.92	34.15	34.37	31.7	34.83	35.28	35.5	35.57	34.54	36.62	34.68	34.2	36.05			34.13	34.91	31.46
1.38333	28.82	34.04	34.41	31.92	34.85	35.01	35.34	35.54	34.52	36.68	34.68	34.32	36.16			34.22	34.95	31.49
1.4	28.81	34.04	34.43	31.98	34.85	34.77	35.29	35.52	34.47	36.64	34.72	34.42	36.38			34.33	34.97	31.56
1.41667	28.91	34.14	34.43	32.25	34.77	34.64	35.31	35.52	34.42	36.34	34.73	34.34	36.48			34.42	34.96	31.7
1.43333	28.93	34.15	34.42	32.31	34.97	34.56	35.56	35.52	34.39	36.39	34.69	33.94	36.72			34.41	34.93	31.84
1.45	29.02	34.12	34.47	32.2	35.2	34.51	35.89	35.52	34.36	36.52	34.59	33.84	36.79			34.31	34.88	31.91
1.46667	29.14	34.36	34.44	32.2	35.36	34.51	35.85	35.5	34.29	36.63	34.6	34.15	36.79			34.3	34.86	31.93
1.48333	29.22	34.5	34.48	32.51	35.29	34.51	35.6	35.5	34.35	36.68	34.66	34.22	36.78			34.33	34.96	31.96
1.5	29.3	34.58	34.76	32.7	35.28	34.51	35.92	35.5	34.39	36.68	34.69	34.21	36.8			34.33	35.03	32.05
1.51667	29.4	34.67	35.13	32.85	35.37	34.51	36.27	35.49	34.27	36.66	34.7	34.23	36.75			34.19	35.03	32.19
1.53333	29.54	34.8	35.21	32.98	35.54	34.5	36.33	35.47	34.15	36.65	34.72	34.4	36.67			33.92	35.01	33.12
1.55	29.65	34.82	35.13	33.02	35.59	34.5	36.32	35.43	34.23	36.61	34.72	34.56	36.67			33.72	34.97	33.04
1.56667	29.75	34.84	35.13	32.67	35.35	34.5	36.28	35.41	34.36	36.59	34.72	34.65	36.68			33.58	34.94	32.54
1.58333	29.77	34.85	35.19	32.41	35.18	34.52	36.22	35.31	34.39	36.56	34.7	34.69	36.68			33.5	34.93	32.74
1.6	29.48	34.89	35.21	32.29	35.39	34.53	36.17	35.21	34.2	36.5	34.68	34.73	36.66			33.5	34.93	32.73
1.61667	29.42	34.93	35.25	32.36	35.76	34.53	36.04	35.18	33.87	36.43	34.65	34.72	36.65			33.43	34.91	32.71
1.63333	29.52	34.87	35.28	32.38	35.84	34.5	35.94	35.2	33.85	36.34	34.64	34.71	36.65			33.36	34.84	32.82
1.65	29.6	34.78	35.28	32.25	35.84	34.42	35.86	35.2	33.9	36.23	34.63	34.75	36.64			33.37	34.72	33.16
1.66667	29.69	34.79	35.22	32.15	35.76	34.45	35.82	35.23	33.81	36.16	34.62	34.85	36.61			33.36	34.76	33.38
1.68333	29.82	34.89	35.17	32.3	35.66	34.56	35.73	35.35	33.62	36.1	34.59	34.87	36.52			33.31	34.96	33.44
1.7	29.82	34.92	35.1	32.43	35.64	34.66	35.38	35.32	33.54	36.06	34.56	34.83	36.47			33.38	35.02	33.7
1.71667	29.7	34.94	35.02	32.5	35.76	34.73	35.31	35.25	33.49	36.03	34.55	34.87	36.49			33.61	35.08	33.9
1.73333	29.57	35.01	34.95	32.53	35.95	34.78	35.3	35.21	33.53	35.95	34.54	34.92	36.47			33.88	35.13	34.05
1.75	29.61	35.08	34.9	32.63	36	34.81	35.27	35.2	33.54	35.79	34.55	34.9	36.28			34.1	35.14	34.16
1.76667	29.75	35.11	34.9	32.76	36.1	34.82	35.23	35.23	33.55	35.68	34.55	34.93	36.13			34.12	35.12	34.19
1.78333	29.88	35.13	34.92	32.86	36.15	34.82	35.2	35.36	33.55	35.68	34.54	35.04	35.94			34.15	35.09	34.2
1.8	30.01	35.15	34.91	32.89	36.17	34.83	35.18	35.45	33.48	35.69	34.52	35.06	35.7			34.29	35.06	34.28
1.81667	30.15	35.11	34.96	32.85	36.2	34.84	34.93	35.48	33.48	35.69	34.48	35.02	35.67			34.44	35.01	34.46
1.83333	30.27	35.05	35.01	32.78	36.22	34.84	34.82	35.49	33.54	35.69	34.46	34.99	35.68			34.65	34.97	34.56
1.85	30.35	35.06	35.05	32.57	36.26	34.68	34.8	35.48	33.55	35.68	34.48	35	36.03			34.7	34.94	34.6
1.86667	30.37	35.02	35.07	32.5	36.38	34.28	34.79	35.45	33.56	35.69	34.48	35.1	36.14			34.72	34.92	34.6
1.88333	30.4	34.97	35.07	32.63	36.5	34.18	34.77	35.43	33.65	35.71	34.46	35.16	36.1			34.72	34.98	34.55
1.9	30.45	34.96	35.07	33.16	36.39	33.93	34.79	35.38	33.81	35.7	34.45	35.14	36.09			34.69	34.94	34.55
1.91667	30.54	35.06	35.19	33.3	36.15	33.9	34.83	35.36	34.21	35.69	34.45	35.09	36.19			34.69	34.82	34.56
1.93333	30.66	35.15	35.22	33.21	36.1	33.97	34.82	35.34	34.24	35.66	34.43	35.26	36.27			34.66	34.75	34.54
1.95	30.79	35.24	35.18	32.92	36.06	34.23	34.88	35.35	34.21	35.63	34.4	35.42	36.36			34.64	34.68	34.53
1.96667	30.91	35.29	35.17	32.92	35.91	34.79	34.92	35.36	34.33	35.61	34.36	35.47	36.4			34.64	34.61	34.53
1.98333	30.93	35.31	35.25	33	35.71	34.99	34.86	35.37	34.51	35.88	34.32	35.56	36.34			34.63	34.46	34.57
2	30.7	35.29	35.39	33.2	35.68	35.07	34.83	35.37	34.58	36.05	34.31	35.63	36.25			34.63	34.33	34.61
2.01667	30.54	35.24	35.39	33.25	35.65	35.11	34.83	35.36	34.67	36.22	34.3	35.6	36.15			34.63	34.25	34.63
2.03333	30.56	35.12	35.3	33.16	35.67	35.14	34.84	35.34	34.82	36.24	34.28	35.59	36.06			34.62	34.17	34.66
2.05	30.79	35.07	35.33	33.04	35.74	35.16	34.85	35.3	34.92	36.27	34.27	35.61	36.09			34.54	34.17	34.71
2.06667	30.86	34.94	35.46	33.17	35.82	35.16	34.85	35.25	34.93	36.35	34.26	35.6	36.16			34.4	34.31	34.72
2.08333	30.93	34.9	35.57	33.4	35.97	35.17	34.84	35.15	34.97	36.4	34.27	35.48	36.24			34.32	34.47	34.71
2.1	31.03	34.93	35.62	33.55	36.14	35.18	34.88	35.11	35.04	36.98	34.3	35.37	36.32			34.3	34.57	34.71
2.11667	30.92	34.97	35.63	33.57	36.25	35.18	35.06	35.09	35.04	37.46	34.31	35.35	36.39			34.27	34.74	34.71
2.13333	30.84	35	35.63	33.51	36.25	35.19	35.17	35.2	35.02	37.55	34.32	35.36	36.48			34.27	34.88	34.69
2.15	30.79	34.99	35.64	33.04	36.24	35.19	35.14	35.33	35.02	37.52	34.32	35.4	36.49			34.29	35.17	34.69
2.16667	30.74	34.96	35.62	32.87	36.29	35.19	34.97	35.33	34.99	37.47	34.32	35.47	36.33			34.3	35.29	34.69
2.18333	30.69	35.08	35.63	33.04	36.45	35.18	34.96	35.22	34.92	37.42	34.32	35.52	36.23			34.31	35.31	34.67
2.2	30.75	35.26	35.65	33.23	36.52	35.17	35.04	35.16	34.97	37.34	34.32	35.55	36.22			34.32	35.25	34.67
2.21667	31.09	35.43	35.66	33.22	36.58	35.17	35.19	35.19	34.98	37.31	34.33	35.55	36.39			34.32	35.24	34.68
2.23333	31.31	35.52	35.63	33.14	36.44	35.05	35.35	35.24	34.77	37.45	34.32	35.64	36.53			34.29	35.23	34.66
2.25	31.35	35.54	35.52	33.09	36.19	34.75	35.44	35.23	34.63	37.47	34.24	35.98	36.62			34.3	35.21	34.61
2.26667	31.39	35.54	35.43	33.12	36.26	34.66	35.5	35.2	34.58	37.46	34.22	36.14	36.7			34.33	35.24	34.61
2.28333	31.47	35.48	35.49	33.13	36.6	34.64	35.5	35.14	34.47	37.38	34.23	36.22	36.73			34.32	35.29	34.62
2.3	31.51	35.33	35.52	33.12	36.75	34.63	35.26	35.08	34.43	37.21	34.23	36.27	36.73			34.13	35.29	34.62
2.31667	31.84	35.25	35.31	33.14	36.77	34.61	35.24	35.05	34.43	37.08	34.25	36.27	36.69			33.93	35.25	34.64
2.33333	31.96	35.19	35.17	33.15	36.81	34.61	35.43	35.03	34.43	36.98	34.25	36.12	36.63			33.84	35.23	34.66
2.35	31.92	35.18	35.37	33.12	36.83	34.62	35.44	34.99	34.41	36.87	34.24	35.79	36.58			33.89	35.29	34.7
2.36667	32.05	35.2	35.46	33.06	36.82	34.63	35.14	34.98	34.4	36.8	34.24	35.65	36.53			34.1	35.31	34.76
2.38333	32.26	35.23	35.54	33.02	36.85	34.64	35.06	34.95	34.4	36.81	34.21	35.71	36.47			34.24	35.36	34.83
2.4	32.58	35.25	35.65	33.11	36.94	34.65	35.09	34.89	34.4	36.8	34.17	35.78	36.41			34.32	35.38	34.88
2.41667	32.76	35.23	35.85	33.72	37.03	34.62	35.12	34.86	34.35	36.74	34.12	35.82	36.35			34.37	35.32	34.92
2.43333	32.79	35.1	36.01	34.08	37.06	34.57	35.13	34.84	34.32	36.69	34.1	35.95	36.3			34.41	35.25	35.03
2.45	32.79	34.94	36.18	34.24	37.01	34.55	35.13	34.83	34.43	36.66	34.09	35.93	36.2			34.49	35.21	35.3
2.46667	32.98	34.85	36.33	34.33	37.04	34.5	35.13	34.83	34.45	36.64	34.08	35.77	35.99			34.52	35.17	35.39
2.48333	33.3	34.88	36.34	34.43	37.07	34.25	35.12	34.82	34.35	36.59	34.03	35.67	35.78			34.48	35.26	35.42
2.5	33.56	34.93	36.3	34.49	36.9	34.13	35.12	34.8	34.34	36.57	34.05	35.64	35.67			34.45	35.22	35.43
2.51667	33.76	35.01	36.29	34.5	36.71	34.16	35.23	34.81	34.48	36.57	34.07	35.72	35.6			34.48	34.93	35.41
2.53333	33.9	35.05	36.28	34.53	36.63	34.19	35.47	34.82	34.54	36.56	34.07	35.94	35.53			34.51	34.73	35.4
2.55	33.96	35.08	36.31	34.55	36.64	34.45	35.46	34.8	34.56	36.54	34.08	35.95	35.46			34.53	34.66	35.4
2.56667	33.97	35.03	36.52	34.56	36.66	34.62	35.17	34.78	34.57	36.51	34.1	35.88	35.41			34.52	34.61	35.4
2.58333	34	34.98	36.57	34.55	36.72	34.59	35.25	34.76	34.58	36.47	34.11	35.85	35.41			34.49	34.55	35.4
2.6	34.04	35.07	36.56	34.56	36.71	34.62	35.81	34.75	34.57	36.22	34.11	35.93	35.43			34.47	34.49	35.41
2.61667	34.08	35.09	36.51	34.58	36.69	34.94	36.17	34.73	34.54	36.32	34.14	36.05	35.44			34.43	34.44	35.49
2.63333	34.16	35.07	36.39	34.59	36.58	35.14	36.2	34.73	34.56	36.69	34.13	36.12	35.47			34.36	34.38	35.73
2.65	34.22	35.11	36.32	34.64	36.52	35.21	36.15	34.73	34.45	36.78	34.1	36.09	35.49			34.32	34.32	35.84
2.66667	34.25	35.12	36.31	34.7	36.65	35.23	36.04	34.69	34.3	36.6	34.06	35.78	35.49			34.24	34.26	35.88
2.68333	34.25	35.19	36.34	34.68	36.79	35.23	35.86	34.63	34.17	36.32	34.03	35.71	35.55			34.18	34.21	35.93
2.7	34.23	35.24	36.32	34.78	36.84	35.22	35.86	34.62	34.19	36.28	34.01	35.73	35.61			34.16	34.2	35.97
2.71667	34.18	35.46	36.29	34.87	36.9	35.18	35.9	34.62	34.18	36.44	33.99	35.65	35.64			34.15	34.17	36
2.73333	34.17	35.5	36.44	34.68	36.97	35.13	36.08	34.75	34.18	36.47	33.97	35.58	35.64			34.12	34.15	36.01
2.75	34.18	35.53	36.48	34.6	36.95	35.1	36.18	35.14	34.26	36.5	33.95	35.51	35.61			34.11	34.17	35.98
2.76667	34.16	35.53	36.36	34.57	36.91	35.08	36.16	35.19	34.31	36.67	33.94	35.49	35.57			34.11	34.16	35.99
2.78333	34.15	35.52	36.21	34.56	36.83	35.03	36.12	35.18	34.34	36.54	33.92	35.49	35.53			34.11	34.09	36.1
2.8	34.11	35.67	36.14	34.55	36.75	35.03	36.05	35.16	34.36	36.43	33.88	35.56	35.5			34.12	34.08	36.09
2.81667	34.05	35.73	36.08	34.54	36.63	35.03	35.96	35.15	34.36	36.5	33.89	35.67	35.47			34.12	34.08	35.71
2.83333	33.98	35.74	36.03	34.53	36.72	35.06	35.91	35.13	34.38	36.58	33.89	35.83	35.44			34.11	34.09	35.59
2.85	33.93	35.71	36	34.54	36.83	35.13	35.83	35.12	34.4	36.51	33.9	35.91	35.42			34.1	34.12	35.67
2.86667	33.87	35.7	35.99	34.54	36.81	35.19	35.76	35.11	34.4	36.36	33.91	35.91	35.41			34	34.13	35.78
2.88333	33.85	35.83	35.95	34.56	36.83	35.23	35.68	35.09	34.35	36.24	33.91	35.95	35.39			33.96	34.13	35.95
2.9	33.87	35.95	35.84	34.55	36.76	34.95	35.62	35.12	34.32	36.09	33.89	36.04	35.39			34.07	34.13	36.04
2.91667	33.89	35.98	35.82	34.53	36.66	34.83	35.43	35.15	34.35	36.03	33.89	35.94	35.41			34.14	34.15	35.98
2.93333	33.94	36.04	35.77	34.52	36.54	34.82	34.99	35.15	34.29	35.99	33.88	35.79	35.42			34.25	34.23	35.68
2.95	34.01	36.06	35.7	34.64	36.62	34.79	34.84	35.14	34.24	35.95	33.85	35.75	35.42			34.35	34.26	35.76
2.96667	34.05	35.99	35.65	34.64	36.8	34.77	35.06	35.13	34.23	35.88	33.84	35.62	35.38			34.4	34.23	35.93
2.98333	34.06	35.95	35.59	34.33	36.95	34.67	35.12	35.14	34.23	35.79	33.86	35.55	35.31			34.41	34.07	36.05
3	34.06	35.82	35.57	34.32	37.05	34.67	35.02	35.15	34.22	35.71	33.93	35.61	35.3			34.33	34.07	36.19
3.01667	34.08	35.79	35.51	34.37	37.15	34.7	34.93	35.15	34.21	35.65	33.95	35.79	35.29			34.3	34.06	36.43
3.03333	34.1	35.64	35.46	34.36	37.13	34.72	34.86	35.14	34.2	35.58	33.91	35.81	35.28			34.3	33.97	36.55
3.05	34.16	35.59	35.43	34.14	36.81	34.75	34.9	34.96	34.15	35.52	33.82	35.78	35.26			34.42	33.88	36.53
3.06667	34.22	35.66	35.41	33.9	36.65	34.92	34.92	34.68	34.11	35.48	33.8	35.73	35.21			34.43	33.81	36.54
3.08333	34.26	35.63	35.37	33.83	36.71	35.05	34.93	34.66	34.17	35.47	33.8	35.65	35.11			34.22	33.76	36.57
3.1	34.3	35.56	35.32	33.82	36.78	35.13	34.94	34.68	34.14	35.47	33.76	35.73	35.05			34	33.72	36.69
3.11667	34.31	35.7	35.33	33.72	36.91	35.2	34.94	34.69	34.05	35.53	33.75	35.88	35.03			33.84	33.69	36.95
3.13333	34.3	35.77	35.35	33.76	37.1	35.23	34.92	34.69	34.04	35.98	33.86	35.89	35.04			33.68	33.68	37.1
3.15	34.29	35.88	35.32	34.01	37.17	35.26	34.91	34.68	34.09	36.22	34.05	35.7	35.1			33.56	33.86	37.15
3.16667	34.28	35.98	35.31	34.13	37.22	35.26	34.88	34.67	34.21	36.29	34.16	35.38	35.29			33.53	33.91	37.05
3.18333	34.27	35.99	35.28	34.13	37.34	35.26	34.85	34.64	34.24	36.27	34.27	35.27	35.34			33.66	33.88	36.9
3.2	34.28	35.96	35.23	33.98	37.35	35.27	34.81	34.63	34.2	36.21	34.37	35.18	35.34			33.78	33.82	36.97
3.21667	34.29	36.03	35.21	33.79	37.41	35.27	34.8	34.63	34.19	36.15	34.45	35.12	35.33			33.85	33.78	37.01
3.23333	34.28	36.48	35.25	33.81	37.48	35.28	34.79	34.6	34.43	36.1	34.52	35.08	35.31			33.95	33.73	36.98
3.25	34.26	36.6	35.22	33.94	37.53	35.31	34.77	34.59	34.53	36.03	34.55	35.01	35.29			34.09	33.78	36.88
3.26667	34.25	36.61	35.18	34.04	37.57	35.32	34.66	34.59	34.29	35.98	34.57	34.98	35.25			34.21	33.94	36.78
3.28333	34.3	36.58	35.1	34.09	37.55	35.31	34.53	34.59	34.23	35.99	34.56	34.98	35.22			34.32	34	36.69
3.3	34.41	36.55	35.11	34.12	37.45	35	34.49	34.57	34.25	36.03	34.5	34.97	35.17			34.4	34.04	36.6
3.31667	34.43	36.55	35.21	34.13	37.41	34.76	34.46	34.53	34.08	36.09	34.43	34.97	35.1			34.45	34.07	36.5
3.33333	34.36	36.6	35.24	34.12	37.38	34.69	34.4	34.51	33.98	36.19	34.41	34.95	35.05			34.47	34.07	36.54
3.35	34.28	36.62	35.24	34.18	37.39	34.56	34.39	34.49	34	36.2	34.4	34.94	35.03			34.47	34.07	36.58
3.36667	34.29	36.61	35.21	34.31	37.38	34.67	34.38	34.45	33.98	36.2	34.39	34.92	35.02			34.45	34.06	36.55
3.38333	34.18	36.59	35.17	34.8	37.23	34.93	34.47	34.41	33.97	36.19	34.32	34.9	34.98			34.44	34.02	36.56
3.4	34.12	36.57	35.09	35.38	37.13	34.9	34.68	34.39	33.92	36.18	34.24	34.93	34.99			34.42	34	36.55
3.41667	34.06	36.54	34.96	35.67	37.08	34.85	34.64	34.36	33.93	36.17	34.19	34.93	34.99			34.41	33.99	36.44
3.43333	33.99	36.48	34.9	35.79	37.06	34.91	34.56	34.32	34.08	36.16	34.15	34.87	34.94			34.4	33.95	36.39
3.45	33.92	36.39	34.95	35.86	37.13	35.27	34.58	34.3	34.22	36.15	34.11	34.76	34.9			34.42	33.9	36.4
3.46667	33.9	36.42	35	35.88	37.24	35.38	34.58	34.27	34.23	36.17	34.09	34.69	34.87			34.42	33.81	36.41
3.48333	33.88	36.44	35.04	35.89	37.39	35.43	34.58	34.25	34.18	36.21	34.1	34.6	34.82			34.42	33.75	36.43
3.5	33.86	36.44	35.08	35.93	37.47	35.44	34.58	34.23	34.26	36.2	34.1	34.68	34.75			34.41	34.1	36.45
3.51667	33.91	36.41	35.24	35.93	37.48	35.44	34.71	34.23	34.27	36.09	34.15	34.79	34.7			34.49	34.33	36.47
3.53333	34.1	36.33	35.52	35.92	37.25	35.49	34.7	34.34	34.26	36.01	34.17	34.86	34.69			34.57	34.47	36.49
3.55	34.19	36.2	35.51	35.93	36.93	35.51	34.73	34.36	34.22	36.04	34.16	34.89	34.76			34.62	34.54	36.51
3.56667	34.23	36.25	35.35	35.93	36.71	35.5	34.89	34.38	34.17	36.11	34.2	34.91	34.84			34.65	34.55	36.52
3.58333	34.25	36.31	35.35	35.9	36.55	35.43	34.92	34.39	34.19	36.1	34.23	35.01	34.89			34.66	34.43	36.5
3.6	34.26	36.3	35.36	35.85	36.42	35.3	34.91	34.39	34.24	36.04	34.26	35.02	34.92			34.7	34.33	36.49
3.61667	34.26	36.24	35.37	35.86	36.34	35.25	34.92	34.39	34.27	36.13	34.27	34.97	34.95			34.73	34.29	36.49
3.63333	34.25	36.08	35.39	35.89	36.36	35.24	34.93	34.4	34.3	36.16	34.29	35	34.98			34.73	34.27	36.52
3.65	34.25	36.07	35.45	35.88	36.44	35.34	34.98	34.49	34.38	36.13	34.32	34.99	35.01			34.74	34.25	36.55
3.66667	34.23	36.04	35.48	35.84	36.45	35.41	34.98	34.62	34.43	35.97	34.35	34.92	35.04			34.74	34.2	36.58
3.68333	34.21	36.03	35.5	35.82	36.51	35.43	34.95	34.61	34.45	35.95	34.35	34.89	35.05			34.75	34.18	36.56
3.7	34.2	36.02	35.5	35.8	36.84	35.45	34.93	34.61	34.46	35.99	34.35	34.96	35.07			34.76	34.18	36.51
3.71667	34.22	35.99	35.47	35.54	37	35.49	34.92	34.63	34.47	36.05	34.33	35.01	35.15			34.74	34.17	36.46
3.73333	34.25	35.89	35.45	34.79	36.99	35.5	34.9	34.64	34.49	36.18	34.29	35.1	35.19			34.71	34.14	36.41
3.75	34.37	35.86	35.39	34.73	36.85	35.42	34.87	34.65	34.5	36.21	34.24	35.12	35.2			34.68	34.1	36.33
3.76667	34.47	35.74	35.35	34.78	36.76	35.29	34.85	34.67	34.52	36.14	34.21	35.08	35.2			34.66	34.09	36.29
3.78333	34.58	35.7	35.49	34.72	36.75	35.14	34.8	34.69	34.59	36.1	34.17	34.93	35.15			34.65	34.08	36.25
3.8	34.56	35.7	35.41	34.49	36.81	35.1	34.77	34.69	34.63	36.1	34.14	34.91	35.11			34.6	34.09	36.2
3.81667	34.53	35.67	35.18	34.31	36.84	35.08	34.73	34.7	34.64	36.04	34.11	34.94	35.09			34.54	34.12	36.15
3.83333	34.46	35.64	35.24	34.22	36.83	35.05	34.7	34.81	34.65	35.97	34.02	34.96	35.09			34.51	34.14	36.14
3.85	34.37	35.61	35.26	34.15	36.93	35.1	34.68	34.9	34.6	36.39	33.96	34.98	35.09			34.51	34.09	36.13
3.86667	34.29	35.58	35.26	34.4	37.17	35.28	34.65	34.97	34.45	36.45	33.92	35.06	35.15			34.54	34.07	36.12
3.88333	34.26	35.53	35.26	34.55	37.2	35.32	34.61	35.02	34.44	36.39	33.93	35.12	35.32			34.56	34.18	36.11
3.9	34.18	35.48	35.29	34.85	37.1	35.32	34.57	35.05	34.46	36.37	33.93	35.1	35.62			34.58	34.19	36.05
3.91667	34.05	35.47	35.28	34.99	37.07	35.18	34.54	35.09	34.49	36.35	33.99	34.97	35.6			34.57	34.06	36
3.93333	33.91	35.54	35.24	35.12	37.14	34.92	34.53	35.13	34.5	36.32	34.13	34.95	35.56			34.55	34.01	36.01
3.95	34.03	35.7	35.19	35.29	37.16	34.93	34.56	35.16	34.5	36.3	34.24	34.95	35.6			34.55	34.51	36.03
3.96667	34.16	35.74	35.16	35.25	37.16	35.01	34.6	35.16	34.41	36.33	34.34	34.96	35.57			34.55	34.64	36.05
3.98333	34.24	35.82	35.13	35.14	37.22	35.03	34.63	35.18	34.31	36.37	34.41	34.88	35.56			34.54	34.62	36.1
4	34.27	35.83	35.08	35.02	37.14	35.06	34.65	35.19	34.33	36.39	34.48	34.84	35.67			34.51	34.63	36.13
4.01667	34.28	35.9	35.07	34.57	36.8	35.08	34.67	35.21	34.43	36.37	34.55	34.85	35.64			34.48	34.68	36.13
4.03333	34.29	35.97	35.09	34.06	36.61	35.07	34.67	35.23	34.48	36.3	34.63	34.83	35.64			34.53	34.83	36.13
4.05	34.31	35.99	35.14	34.05	36.51	34.79	34.67	35.25	34.46	36.23	34.69	34.83	35.76			34.54	34.94	36.14
4.06667	34.35	35.97	35.17	34.42	36.44	34.68	34.67	35.26	34.42	36.16	34.72	34.9	35.88			34.52	35.16	36.14
4.08333	34.36	35.98	35.14	34.73	36.43	34.69	34.74	35.26	34.39	36.11	34.74	34.9	35.97			34.5	35.28	36.1
4.1	34.36	35.98	35.13	34.93	36.44	34.68	34.88	35.24	34.32	36.05	34.75	34.83	36.1			34.44	35.38	36.05
4.11667	34.4	35.98	35.15	34.94	36.43	34.66	34.9	35.21	34.37	36.03	34.76	34.75	36.45			34.36	35.41	36.27
4.13333	34.5	35.96	35.14	34.88	36.41	34.66	34.85	35.21	34.44	36.02	34.75	34.67	36.54			34.37	35.38	36.41
4.15	34.56	35.94	35.27	34.9	36.35	34.58	34.73	35.21	34.48	36	34.71	34.63	36.42			34.39	35.35	36.43
4.16667	34.58	35.96	35.28	35.02	36.25	34.52	34.71	35.22	34.48	35.98	34.63	34.58	36.32			34.38	35.34	36.43
4.18333	34.58	35.92	35.23	35.3	36.35	34.5	34.69	35.21	34.46	35.97	34.55	34.5	36.31			34.34	35.35	36.43
4.2	34.56	35.76	35.54	35.38	36.56	34.5	34.67	35.2	34.43	35.98	34.4	34.48	36.19			34.47	35.37	36.32
4.21667	34.51	35.66	35.75	35.38	36.62	34.54	34.69	35.21	34.4	35.99	34.33	34.46	36.02			34.68	35.38	36.2
4.23333	34.48	35.67	35.77	35.4	36.63	34.67	34.81	35.23	34.37	36	34.31	34.4	35.91			34.68	35.37	36.17
4.25	34.54	35.71	35.79	35.4	36.61	34.76	34.77	35.24	34.36	36.02	34.43	34.37	36.05			34.47	35.35	36.12
4.26667	34.56	36.05	35.92	35.39	36.59	34.79	34.56	35.24	34.38	36.05	34.48	34.38	36.11			34.36	35.29	35.99
4.28333	34.47	36.15	36.03	35.42	36.55	34.81	34.45	35.24	34.38	36.08	34.44	34.48	36.06			34.48	35.36	35.99
4.3	34.24	36.15	36.08	35.42	36.5	34.81	34.41	35.25	34.35	36.12	34.22	34.62	36.06			34.48	35.46	35.98
4.31667	34.09	36.21	36.25	35.41	36.44	34.8	34.44	35.25	34.34	36.17	33.98	34.63	36.06			34.34	35.54	35.95
4.33333	33.94	36.28	36.42	35.39	36.43	34.79	34.71	35.25	34.26	36.2	33.71	34.56	36.06			34.44	35.56	35.9
4.35	33.61	36.27	36.43	35.38	36.42	34.78	34.8	35.25	34	36.23	33.55	34.53	36.04			34.58	35.54	35.89
4.36667	33.22	36.21	36.39	35.37	36.45	34.75	34.82	35.26	33.89	36.23	33.51	34.46	36			34.66	35.55	35.87
4.38333	33.02	36.15	36.4	35.27	36.52	34.67	34.81	35.27	33.88	36.24	33.5	34.31	35.94			34.7	35.61	35.81
4.4	33.11	36.09	36.41	34.99	36.57	34.59	34.75	35.24	33.9	36.24	33.64	34.23	35.89			34.73	35.65	35.86
4.41667	33.32	36.04	36.35	35.01	36.59	34.58	34.72	34.79	33.9	36.23	33.72	34.26	35.95			34.74	35.79	35.86
4.43333	33.35	36.04	36.28	35.07	36.62	34.61	34.7	34.57	33.91	36.2	33.81	34.28	36.03			34.74	35.8	35.84
4.45	33.27	36.08	36.22	35.09	36.61	34.6	34.67	34.46	33.95	36.16	34	34.39	36.01			34.73	35.76	35.84
4.46667	33.35	36.06	36.18	35.06	36.56	34.56	34.62	34.37	33.97	36.12	34.11	34.44	35.95			34.75	35.81	35.84
4.48333	33.52	35.99	36.08	35.03	36.57	34.51	34.56	34.29	33.99	36.09	34.33	34.55	35.91			34.93	35.93	35.79
4.5	33.68	35.94	36.02	34.99	36.43	34.55	34.55	34.24	34.01	36.05	34.43	34.67	35.91			34.97	36.03	35.77
4.51667	34.08	35.87	36.03	34.89	36.29	34.61	34.56	34.28	34.09	36.12	34.63	34.82	35.93			34.92	36.03	35.8
4.53333	34.41	35.82	36.22	34.84	36.41	34.64	34.65	34.58	34.22	36.44	34.65	34.89	35.94			34.91	36.03	35.89
4.55	34.68	35.71	36.26	34.82	36.6	34.66	34.67	34.66	34.24	36.59	34.62	34.83	35.95			34.88	36.12	36.08
4.56667	34.81	35.69	36.2	34.79	36.6	34.67	34.67	34.76	34.21	36.66	34.64	34.78	35.97			34.67	36.16	36.18
4.58333	35	35.68	36.11	34.78	36.78	34.67	34.66	34.9	34.1	36.7	34.75	34.82	35.99			34.59	36.16	36.21
4.6	35.08	35.66	36.05	34.77	36.89	34.66	34.64	34.98	34.15	36.71	35.04	35.12	35.98			34.59	36.11	36.22
4.61667	35.26	35.62	36.04	34.76	37.15	34.66	34.57	34.93	34.29	36.7	35.5	35.33	35.99			34.59	36.07	36.23
4.63333	35.34	35.82	36.07	34.75	37.21	34.64	34.53	34.81	34.28	36.68	35.74	35.46	35.99			34.75	36.01	36.23
4.65	35.4	35.87	36.12	34.78	37.22	34.46	34.52	34.79	34.12	36.67	35.88	35.55	36			34.81	35.94	36.09
4.66667	35.49	35.87	36.1	34.79	37.25	34.45	34.52	34.82	33.89	36.7	35.93	35.68	36.01			34.79	35.86	35.96
4.68333	35.57	35.87	36.11	34.7	37.3	34.7	34.51	35.09	33.76	36.78	35.93	35.66	36			34.8	35.76	35.95
4.7	35.59	35.86	36.12	34.55	37.34	34.68	34.49	35.26	33.75	36.8	35.79	35.33	35.98			34.83	35.66	35.93
4.71667	35.58	36.01	36.13	34.34	37.34	34.62	34.42	35.28	33.85	36.74	35.45	35.22	35.97			34.74	35.53	35.76
4.73333	35.55	36.17	36.12	34.16	37.47	34.64	34.47	35.29	33.94	36.51	35.33	35.12	35.95			34.31	35.32	35.71
4.75	35.52	36.18	36.07	34.21	37.56	34.73	34.51	35.34	33.99	36.23	35.32	35.18	35.94			33.92	35.15	35.8
4.76667	35.49	36.14	36.01	34.31	37.53	34.93	34.54	35.4	33.98	36.07	35.3	35.21	36.1			33.57	35.06	36.01
4.78333	35.44	36.1	35.95	34.5	37.42	35.01	34.69	35.3	33.92	35.97	35.27	35.2	36.18			33.47	34.99	36.13
4.8	35.38	36.04	35.87	34.52	37.38	35.02	35.13	35.2	33.74	35.91	35.21	35.15	36.19			33.34	34.93	36.18
4.81667	35.32	36.01	35.84	34.36	37.36	34.94	35.16	35.21	33.78	35.86	35.13	35.09	36.2			33.17	34.88	36.07
4.83333	35.24	35.98	35.86	34.15	37.36	34.91	35.16	35.26	34.14	35.84	35.07	35.01	36.2			33.11	34.83	35.86
4.85	35.16	35.92	35.86	33.91	37.34	34.84	35.06	35.39	34.48	35.82	35.02	34.9	36.18			33.07	34.79	35.82
4.86667	35.1	35.89	35.73	33.81	37.28	34.7	35	35.46	34.78	35.78	34.97	34.83	36.21			33.06	34.76	36.01
4.88333	35.09	35.85	35.63	33.75	37.04	34.7	35.01	35.45	34.94	35.73	34.91	34.77	36.22			33.07	34.74	36.3
4.9	35.09	35.81	35.36	33.61	36.75	34.68	34.95	35.52	35.01	35.69	34.85	34.76	36.21			33.19	34.74	36.43
4.91667	35.08	35.89	35.25	33.57	36.76	34.67	34.64	35.71	35.03	35.65	34.8	34.76	36.19			33.37	34.87	36.48
4.93333	35.07	35.89	35.39	33.54	36.82	34.66	34.64	35.83	35.01	35.56	34.75	34.74	36.15			33.7	34.89	36.45
4.95	35.07	35.91	35.45	33.54	36.84	34.71	34.71	35.86	34.88	35.35	34.72	34.65	36.11			33.97	34.86	36.44
4.96667	35.05	35.98	35.53	33.59	36.97	34.72	34.77	35.85	34.41	35.23	34.7	34.59	36.1			34.24	34.87	36.42
4.98333	35.03	36.02	35.71	33.63	37.22	34.62	34.84	35.81	34.09	35.21	34.69	34.53	36.1			34.44	34.91	36.33
5	35.02	36.03	35.97	33.72	37.28	34.29	34.87	35.78	33.97	35.21	34.68	34.49	36.1			34.58	34.93	36.31
5.01667	34.99	36.08	36.11	33.83	37.27	34.2	34.89	35.73	34.03	35.19	34.62	34.44	36.1			34.67	34.93	36.35
5.03333	34.95	36.15	36.37	33.87	37.27	34.08	34.9	35.7	34.16	35.17	34.59	34.38	36.14			34.79	34.93	36.36
5.05	34.91	36.23	36.46	33.85	37.28	34.19	34.89	35.66	34.25	35.16	34.57	34.36	36.15			34.85	34.93	36.33
5.06667	34.88	36.3	36.43	33.85	37.38	34.21	34.89	35.64	34.29	35.14	34.55	34.34	36.15			34.85	34.97	36.31
5.08333	34.84	36.38	36.52	33.94	37.42	34.18	34.91	35.6	34.3	35.16	34.53	34.33	36.13			34.84	34.99	36.43
5.1	34.8	36.46	36.71	34	37.44	34.25	34.95	35.52	34.32	35.43	34.49	34.29	36.12			34.81	35	36.48
5.11667	34.78	36.47	36.68	34.07	37.42	34.23	35.19	35.39	34.33	35.57	34.44	34.26	36.12			34.74	34.99	36.08
5.13333	34.79	36.43	36.55	34.08	37.38	34.06	35.12	35.32	34.4	35.7	34.4	34.26	36.13			34.69	34.94	36.05
5.15	34.86	36.31	36.42	34.09	37.36	35.1	34.85	35.26	34.52	35.72	34.38	34.27	36.14			34.75	34.81	36.08
5.16667	34.87	36.12	36.35	34.12	37.4	35.92	34.82	35.17	34.54	35.77	34.34	34.31	36.11			34.85	34.74	36.06
5.18333	34.87	36	36.31	34.2	37.41	36.04	34.82	35.1	34.54	35.92	34.31	34.31	36.07			34.96	34.77	36.03
5.2	34.87	35.92	36.41	34.19	37.36	36.17	34.83	35.08	34.54	36.18	34.31	34.29	36.06			35.06	34.82	36.03
5.21667	34.85	35.83	36.48	34.12	37.32	36.51	34.85	35.03	34.55	36.37	34.28	34.25	36.05			35.13	34.85	36.02
5.23333	34.84	35.79	36.51	33.99	37.26	36.63	34.84	35.02	34.55	36.44	34.24	34.21	35.98			35.08	34.87	36.01
5.25	34.84	35.78	36.58	33.91	37.14	36.69	34.82	35.02	34.55	36.45	34.21	34.19	35.91			35.03	34.87	35.96
5.26667	34.84	35.72	36.64	33.86	37.21	36.77	34.81	35.01	34.53	36.57	34.19	34.19	35.87			35.02	34.85	35.88
5.28333	34.83	35.68	36.57	33.8	37.31	36.8	34.71	35	34.42	36.72	34.16	34.21	35.83			35.01	34.79	35.86
5.3	34.8	35.63	36.56	33.77	37.43	36.78	34.64	34.98	34.41	36.65	34.16	34.41	35.9			34.99	34.71	35.84
5.31667	34.75	35.58	36.56	33.73	37.61	36.69	34.65	34.96	34.42	36.48	34.14	34.47	35.98			34.85	34.7	35.82
5.33333	34.72	35.54	36.61	33.68	37.69	36.66	34.67	34.97	34.44	36.5	34.14	34.48	36.01			34.72	34.71	35.81
5.35	34.71	35.5	36.7	33.76	37.74	36.64	34.69	34.97	34.4	36.5	34.12	34.47	36.03			34.65	34.72	35.79
5.36667	34.69	35.45	36.57	34.07	37.75	36.61	34.7	34.94	34.26	36.46	34.11	34.4	36.03			34.61	34.72	35.75
5.38333	34.68	35.38	36.42	34.16	37.74	36.59	34.68	34.9	34.14	36.37	34.11	34.32	36.06			34.54	34.7	35.71
5.4	34.68	35.4	36.47	33.99	37.78	36.56	34.64	34.87	34.12	36.18	34.11	34.28	36.07			34.47	34.55	35.68
5.41667	34.67	35.41	36.44	33.9	37.8	36.53	34.59	34.86	34.27	36.27	34.13	34.26	36.09			34.41	34.1	35.66
5.43333	34.67	35.38	36.4	33.93	37.78	36.51	34.58	34.9	34.31	36.26	34.17	34.25	36.14			34.4	33.96	35.62
5.45	34.68	35.35	36.36	34.13	37.73	36.48	34.55	35.12	34.31	36.27	34.22	34.27	36.13			34.37	33.94	35.59
5.46667	34.67	35.31	36.38	34.27	37.66	36.47	34.39	35.22	34.36	36.32	34.25	34.27	36.11			34.35	33.93	35.59
5.48333	34.65	35.29	36.41	34.37	37.58	36.47	34.49	35.21	34.38	36.36	34.26	34.26	36.19			34.34	33.94	35.65
5.5	34.64	35.24	36.46	34.4	37.45	36.47	34.47	35.2	34.4	36.4	34.2	34.26	36.24			34.31	33.95	35.86
5.51667	34.62	35.24	36.47	34.49	37.41	36.47	34.36	35.19	34.38	36.24	34.15	34.26	36.23			34.3	33.94	35.85
5.53333	34.61	35.35	36.42	34.6	37.41	36.46	34.48	35.18	34.33	36.17	34.2	34.12	36.26			34.28	33.91	35.68
5.55	34.6	35.4	36.35	34.68	37.36	36.45	34.53	35.15	34.29	36.31	34.19	34.1	36.3			34.25	33.86	35.7
5.56667	34.58	35.44	36.28	34.73	37.29	36.44	34.49	35.12	34.25	36.57	34.14	34.17	36.25			34.24	33.83	35.76
5.58333	34.53	35.46	36.19	34.69	37.22	36.46	34.47	35.09	34.18	36.7	34.11	34.17	36.2			34.23	33.8	35.84
5.6	34.37	35.46	36.16	34.58	37.14	36.45	34.56	35.06	34.13	36.78	34.22	34.15	36.18			34.21	33.74	35.96
5.61667	34.32	35.45	36.13	34.74	37.12	36.43	34.75	35.02	34.08	36.83	34.26	34.12	36.19			34.18	33.67	36.11
5.63333	34.37	35.44	36.02	34.91	37.24	36.37	35.05	35	34.04	36.84	34.27	34.06	36.19			34.17	33.64	36.15
5.65	34.4	35.45	35.87	35.05	37.31	36.28	35.21	34.97	34.01	36.84	34.27	33.93	36.23			34.14	33.64	36.21
5.66667	34.4	35.47	35.79	35.13	37.34	36.21	35.25	34.95	33.99	36.82	34.26	33.9	36.28			34.11	33.66	36.31
5.68333	34.42	35.49	35.81	35.08	37.39	36.19	35.13	34.93	34	36.8	34.24	33.91	36.27			34.1	33.68	36.33
5.7	34.57	35.57	35.8	35.02	37.46	36.15	35.09	34.94	34	36.79	34.22	33.92	36.26			34.11	33.7	36.22
5.71667	34.82	35.61	35.8	35.01	37.59	36.13	35.1	34.97	34	36.8	34.16	33.9	36.28			34.08	33.7	36.18
5.73333	34.98	35.65	35.81	34.74	37.65	36.14	34.98	34.97	33.99	36.79	34.12	33.87	36.25			34.07	33.7	36.16
5.75	35.07	35.68	35.8	34.36	37.7	36.09	34.89	34.96	34	36.73	34.1	33.77	36.19			34.07	33.68	36.1
5.76667	35.03	35.69	35.81	34.17	37.7	36.04	35.04	34.97	34.02	36.68	34.09	33.72	36.14			34.07	33.67	36.17
5.78333	34.72	35.7	35.74	34.34	37.7	36.03	35.18	34.98	34.1	36.64	34.08	33.75	36.07			34.08	33.66	36.25
5.8	34.58	35.71	35.66	34.46	37.77	36.03	35.5	34.97	34.12	36.61	34.08	34.09	35.97			34.17	33.66	36.22
5.81667	34.5	35.72	35.69	34.43	37.82	36.03	35.64	34.96	34.1	36.56	34.04	34.16	35.87			34.27	33.65	36.13
5.83333	34.49	35.72	35.69	34.22	37.88	36.01	35.55	34.96	34.01	36.51	34.03	34.14	35.8			34.34	33.65	36.13
5.85	34.5	35.72	35.64	34.22	37.92	35.96	35.49	34.97	33.95	36.47	33.99	34.22	35.73			34.39	33.65	36.14
5.86667	34.48	35.72	35.57	34.26	38	35.92	35.59	34.97	33.94	36.46	33.95	34.21	35.7			34.42	33.65	36.14
5.88333	34.47	35.72	35.54	34.36	38.01	35.89	35.99	34.95	33.96	36.49	33.94	34.15	35.69			34.44	33.62	36.15
5.9	34.46	35.73	35.53	34.41	37.92	35.88	36.14	34.75	34	36.51	33.93	34.13	35.58			34.45	33.62	36.15
5.91667	34.5	35.72	35.55	34.56	37.78	35.92	36.34	34.67	34.01	36.55	33.94	34.13	35.44			34.44	33.66	36.15
5.93333	34.59	35.7	35.54	34.7	37.74	36.02	36.54	34.67	34.1	36.7	33.96	34.04	35.38			34.41	33.74	36.15
5.95	34.62	35.71	35.5	34.56	37.74	36.04	36.6	34.67	34.27	36.82	33.97	34.04	35.35			34.42	33.84	36.16
5.96667	34.61	35.72	35.47	34.39	37.74	36.05	36.68	34.59	34.29	36.85	33.95	34.18	35.33			34.42	33.91	36.14
5.98333	34.58	35.74	35.46	34.34	37.67	36.05	36.88	34.55	34.29	36.92	33.92	34.36	35.31			34.42	34.02	36.11
6	34.5	35.75	35.46	34.28	37.58	36.05	36.91	34.75	34.29	37.03	33.91	34.46	35.3			34.42	34.09	36.09

## Sheet: Tg(Avil-CreERT2) AMG517
Time	Trpv1fl/fl-AMG				Trpv1fl/fl-Veh				Tg(Avil-CreERT2); Trpv1fl/fl-AMG				Tg(Avil-CreERT2); Trpv1fl/fl-Veh
	U015	U342	U345	U747	U015	U342	U345	U747	U012	U343	U748		U012	U343	U748
-1		33.87	35.11	34.18		34.3133	35.24	34.49		35.43	35.27			35.02	34.7333
-0.983333		33.8967	35.0967	34.19		34.41	35.2967	34.4767		35.3733	35.2367			35	34.7733
-0.966667		33.9033	35.0833	34.2733		34.4667	35.3167	34.46		35.29	35.21			34.89	34.74
-0.95		33.9167	35.0633	34.3933		34.5067	35.3133	34.52		35.27	35.19			34.86	34.69
-0.933333		33.8967	35.0333	34.5567		34.5333	35.2933	34.49		35.2433	35.16			34.8933	34.65
-0.916667		33.84	35	34.5767		34.5267	35.29	34.35		35.1967	35.1633			34.9033	34.63
-0.9		33.8067	34.96	34.6133		34.5267	35.31	34.33		35.17	35.2067			34.9	34.6233
-0.883333		33.8133	34.9067	34.7833		34.5733	35.27	34.3433		35.1467	35.28			34.8867	34.6233
-0.866667		33.8	34.8867	34.8967		34.5967	35.1967	34.3767		35.1367	35.3033			34.92	34.6133
-0.85		33.7667	34.93	34.9233		34.61	35.2367	34.3933		35.1267	35.34			35	34.58
-0.833333		33.7367	34.94	34.9333		34.61	35.2767	34.4267		35.1433	35.3533			35.0233	34.5733
-0.816667		33.7167	34.9533	34.9267		34.64	35.3167	34.4633		35.1633	35.34			35.08	34.5433
-0.8		33.7	34.9733	34.9567		34.6933	35.3533	34.5033		35.1967	35.3367			35.0733	34.4867
-0.783333		33.6733	34.9767	34.96		34.7467	35.4067	34.5533		35.18	35.36			35.0567	34.4767
-0.766667		33.6167	34.9867	34.9433		34.77	35.4367	34.5933		35.0767	35.3933			35.0233	34.4433
-0.75		33.5467	34.9533	34.9233		34.79	35.4	34.61		35.1033	35.4733			35.0533	34.4133
-0.733333		33.5433	34.9767	34.88		34.8333	35.35	34.6033		35.1767	35.5067			35.2133	34.41
-0.716667		33.54	35.0067	34.8		34.8633	35.3467	34.5933		35.2833	35.5267			35.2967	34.4133
-0.7		33.5367	34.9767	34.7733		34.8733	35.3667	34.5767		35.36	35.5333			35.3067	34.4167
-0.683333		33.5267	34.9867	34.7667		34.8733	35.3733	34.5633		35.39	35.51			35.2933	34.3933
-0.666667		33.5067	35.03	34.72		34.8767	35.32	34.5433		35.4233	35.52			35.3467	34.3767
-0.65		33.4933	34.9533	34.65		34.8833	35.2033	34.5233		35.4533	35.5533			35.37	34.3467
-0.633333		33.5	34.8467	34.63		34.9167	35.2367	34.49		35.46	35.5667			35.3933	34.3267
-0.616667		33.5167	34.9	34.6133		34.9467	35.4167	34.45		35.47	35.6			35.41	34.34
-0.6		33.5267	34.9267	34.47		34.9467	35.51	34.3467		35.5667	35.6167			35.52	34.35
-0.583333	34.5467	33.5333	34.8867	34.39	34.5067	34.9433	35.5333	34.2967	34.6033	35.5533	35.5933		34.31	35.4433	34.32
-0.566667	34.5967	33.5433	34.84	34.38	34.55	34.9267	35.55	34.2467	34.5633	35.4767	35.58		34.36	35.3067	34.3367
-0.55	34.6133	33.5767	34.81	34.37	34.5533	34.91	35.5333	34.1833	34.6367	35.47	35.5633		34.4833	35.2433	34.3367
-0.533333	34.6667	33.6567	34.8233	34.3533	34.5567	34.9	35.4733	34.2233	34.7567	35.57	35.5533		34.6067	35.3033	34.34
-0.516667	34.73	33.7167	34.9133	34.3633	34.5567	34.8933	35.34	34.3	34.85	35.5867	35.54		34.7	35.3	34.3333
-0.5	34.7633	33.7933	34.9633	34.3733	34.5467	34.87	35.34	34.3933	34.9267	35.63	35.5367		34.78	35.2967	34.3067
-0.483333	34.8433	33.83	34.97	34.3667	34.5367	34.8533	35.33	34.4133	34.98	35.65	35.5367		34.84	35.28	34.2767
-0.466667	34.9333	33.86	34.97	34.3633	34.6267	34.8433	35.3	34.4167	35.0733	35.6267	35.5567		34.9033	35.23	34.28
-0.45	34.9433	33.8833	35.0133	34.3533	34.7033	34.79	35.3333	34.4133	35.1633	35.59	35.58		34.9633	35.1867	34.32
-0.433333	34.9567	33.8933	35.11	34.34	34.7567	34.7667	35.3267	34.41	35.2167	35.5533	35.5933		35	35.1567	34.36
-0.416667	34.9933	33.9	35.1567	34.3433	34.8867	34.75	35.2833	34.4267	35.25	35.55	35.5833		35.09	35.13	34.3667
-0.4	35.04	33.9033	35.1867	34.3367	35	34.73	35.26	34.4267	35.27	35.5333	35.5633		35.1633	35.1233	34.3933
-0.383333	35.0467	33.8967	35.2	34.3367	35.07	34.6967	35.2667	34.4033	35.27	35.4767	35.5567		35.2133	35.0867	34.4033
-0.366667	35.03	33.98	35.22	34.32	35.1133	34.69	35.27	34.4033	35.25	35.3667	35.5533		35.2233	34.9933	34.4
-0.35	35.05	34.15	35.2267	34.37	35.12	34.7467	35.22	34.4367	35.29	35.3633	35.5767		35.2233	35.01	34.41
-0.333333	35.11	34.2167	35.2233	34.4833	35.12	34.76	35.1833	34.4567	35.4467	35.3533	35.6		35.2133	35.0267	34.44
-0.316667	35.13	34.3	35.21	34.52	35.1133	34.7667	35.15	34.4633	35.4733	35.35	35.57		35.2033	35.0533	34.44
-0.3	35.1467	34.3767	35.21	34.5267	35.1033	34.7767	35.11	34.3933	35.4467	35.43	35.5033		35.1833	35.1633	34.4067
-0.283333	35.1333	34.37	35.21	34.5567	35.11	34.7533	35.0733	34.3433	35.4633	35.4667	35.4333		35.1433	35.2367	34.38
-0.266667	35.1167	34.3633	35.2067	34.5767	35.1033	34.75	35.07	34.3333	35.52	35.46	35.44		35.12	35.2567	34.4033
-0.25	35.1167	34.3667	35.1967	34.57	35.07	34.75	35.0467	34.3667	35.6433	35.44	35.45		35.1	35.25	34.4267
-0.233333	35.1033	34.3833	35.1867	34.52	35.0633	34.74	35.0133	34.3867	35.69	35.5033	35.4367		35.08	35.2667	34.4433
-0.216667	35.0833	34.43	35.1333	34.4467	35.1433	34.7267	35.03	34.3967	35.7033	35.6433	35.4667		35.0633	35.37	34.4167
-0.2	35.0633	34.5	35.0533	34.33	35.17	34.7133	35.04	34.36	35.6667	35.73	35.44		35.0533	35.4533	34.41
-0.183333	35.0433	34.54	34.9967	34.2733	35.19	34.74	34.9967	34.3067	35.6067	35.7567	35.4033		35.0467	35.4667	34.42
-0.166667	35.04	34.5333	34.9633	34.2267	35.2767	34.74	34.9633	34.2	35.5667	35.8167	35.34		35.0433	35.5133	34.4167
-0.15	35.03	34.6	34.9867	34.1767	35.3667	34.7367	35.0067	34.1233	35.55	35.87	35.3067		35.04	35.5567	34.4233
-0.133333	35.0233	34.6167	35.0933	34.16	35.3767	34.73	35.0567	34.0733	35.4933	35.91	35.3833		35.0467	35.5733	34.4567
-0.116667	35.0167	34.6167	35.0933	34.25	35.3433	34.7	35.0867	34.07	35.4433	35.91	35.43		35.05	35.5667	34.49
-0.1	35.0067	34.62	35.0833	34.22	35.3233	34.6633	35.1033	34.0833	35.39	35.87	35.5267		35.0567	35.55	34.4967
-0.0833333	34.99	34.5933	35.1133	34.1767	35.4067	34.6733	35.1	34.0667	35.3333	35.8	35.5033		35.0667	35.5233	34.4967
-0.0666667	35.0067	34.5733	35.17	34.21	35.3933	34.7	35.13	34.0133	35.2533	35.7567	35.4467		35.07	35.43	34.4833
-0.05	35.01	34.5933	35.2167	34.36	35.3267	34.6833	35.1967	34.05	35.2033	35.7333	35.4033		35.06	35.37	34.46
-0.0333333	34.99	34.62	35.2467	34.5	35.33	34.68	35.2633	34.1233	35.12	35.73	35.32		35.0533	35.3333	34.4267
-0.0166667	34.9767	34.6333	35.26	34.5	35.33	34.68	35.3	34.1333	35.05	35.7333	35.2733		35.0567	35.2967	34.39
0	34.9567	34.67	35.2567	34.47	35.3	34.6667	35.3133	34.1233	35	35.7467	35.2967		35.0567	35.2633	34.4333
0.0166667	34.95	34.6967	35.2033	34.32	35.21	34.6267	35.31	34.06	34.9433	35.75	35.3333		35.06	35.25	34.45
0.0333333	34.9333	34.5767	35.1333	33.5133	35.1633	34.5167	35.32	33.56	34.9767	35.7233	35.3467		35.05	35.2467	34.4267
0.05	34.9467	34.3567	35.0767	33.7133	35.23	34.3133	35.28	33.59	34.99	35.3433	34.6967		35.0067	34.9333	34.01
0.0666667	34.9533	34.28	35.03	33.5767	35.3033	34.2533	35.1967	33.3567	34.7367	35.0033	34.3667		34.7233	34.7	33.78
0.0833333	34.8033	34.4333	34.6933	33.48	35.0533	34.3867	34.92	33.1567	34.3967	34.8967	34.3733		34.0833	34.56	33.7967
0.1	34.54	34.62	34.18	33.5067	34.9367	34.53	34.8433	33.0867	34.43	34.9933	34.51		34.1067	34.45	33.8633
0.116667	34.7133	34.8033	34.54	33.6533	35.0467	34.6767	34.9767	33.11	34.41	35.06	34.7167		34.2033	34.46	34.0933
0.133333	34.8967	34.9633	34.4833	33.8067	35.0933	34.8033	35.14	33.1967	34.3933	35.2133	34.9633		34.3033	34.6767	34.3567
0.15	34.9867	35.0333	34.5767	33.9567	35.16	34.9667	35.1833	33.3567	34.4867	35.3233	35.2333		34.28	34.8467	34.73
0.166667	35.0567	35.17	34.5267	34.0933	35.2833	35.1467	35.1467	33.4533	34.69	35.3733	35.47		34.3933	35	35.1667
0.183333	35.13	35.3567	34.51	34.1467	35.4233	35.3	35.17	33.61	34.8967	35.5567	35.6633		34.6367	35.2033	35.31
0.2	35.2233	35.4467	34.6533	34.2867	35.5567	35.4067	35.23	33.6533	35.1167	35.6933	35.8467		35.06	35.3833	35.55
0.216667	35.37	35.5	34.88	34.6367	35.6967	35.5	35.29	33.6567	35.3233	35.7067	35.9933		35.45	35.5467	35.8233
0.233333	35.4633	35.5033	34.9067	34.8467	35.7667	35.6167	35.2633	33.5967	35.54	35.6933	36.1033		35.46	35.58	35.9033
0.25	35.58	35.5267	34.85	34.8467	35.77	35.6933	35.2933	33.5367	35.61	35.7633	36.1967		35.4567	35.6467	35.86
0.266667	35.77	35.6933	34.9233	34.8333	35.8067	35.8767	35.4033	33.5533	35.7	35.88	36.2333		35.82	35.7467	35.81
0.283333	35.92	35.83	35.07	35.0233	35.8833	35.9367	35.53	33.64	35.83	36.0233	36.23		36.04	35.8067	35.88
0.3	35.9833	35.9533	35.17	35.2433	35.8867	35.9767	35.5867	33.74	35.9333	36.0733	36.23		36.04	35.7367	35.9967
0.316667	36.0133	35.9967	35.26	35.37	35.84	36.03	35.6067	33.8133	36.0267	35.9333	36.2267		36.1433	35.6533	35.95
0.333333	36.0367	36.0167	35.3567	35.3367	35.81	36.04	35.6367	33.8233	36.1333	35.7533	36.16		36.22	35.66	35.7967
0.35	36.16	36.03	35.3433	35.33	35.82	36.03	35.6367	33.9233	36.0933	35.76	36.0367		36.2467	35.74	35.62
0.366667	36.27	36.1	35.4633	35.2967	35.79	36.0367	35.69	33.9933	36.0533	35.82	36.0833		36.3367	35.84	35.6367
0.383333	36.34	36.2633	35.5667	35.2933	35.7633	36.0933	35.7833	33.9233	35.9833	35.8067	36.1		36.4667	35.9133	35.6867
0.4	36.3933	36.3667	35.6333	35.35	35.7467	36.1633	35.84	33.8967	35.8833	35.7933	35.99		36.4867	35.9867	35.72
0.416667	36.3867	36.38	35.7	35.3533	35.7767	36.2533	35.82	33.8933	35.97	35.8933	36.0033		36.42	36.03	35.82
0.433333	36.4233	36.33	35.7567	35.29	35.8767	36.26	35.82	33.94	36.15	35.94	36.0633		36.5333	36.01	35.8933
0.45	36.4533	36.3433	35.7333	35.2867	35.9367	36.2767	35.7433	34.0367	36.2333	36.02	36.27		36.6533	35.9733	35.8733
0.466667	36.47	36.3533	35.7	35.2867	35.99	36.29	35.7267	34.16	36.2433	36.0333	36.33		36.67	35.9867	35.9867
0.483333	36.4433	36.3533	35.6433	35.2733	36.01	36.2667	35.6833	34.14	36.2567	36.05	36.33		36.7	35.9733	36.09
0.5	36.4167	36.3667	35.77	35.3433	36.0233	36.26	35.69	34.1167	36.3633	35.9767	36.3267		36.6767	36.0133	36.0633
0.516667	36.4367	36.3567	35.83	35.5	35.9567	36.24	35.71	34.14	36.39	35.89	36.33		36.5833	35.9733	36.0267
0.533333	36.4033	36.38	35.7933	35.62	35.91	36.22	35.75	34.2533	36.3633	35.81	36.4333		36.5133	35.9967	36.02
0.55	36.3233	36.4233	35.6533	35.6333	35.8733	36.2867	35.6867	34.37	36.3033	35.73	36.47		36.4333	35.9833	35.98
0.566667	36.3667	36.4233	35.55	35.5233	35.9633	36.31	35.67	34.4067	36.2367	35.71	36.5		36.5667	36.02	35.93
0.583333	36.4667	36.44	35.6733	35.4733	35.9767	36.2933	35.7633	34.5	36.2133	35.65	36.4833		36.8133	36.0433	35.8333
0.6	36.45	36.4	35.8433	35.5333	35.99	36.2533	35.9233	34.54	36.2	35.59	36.4067		36.9033	36.0467	35.7467
0.616667	36.27	36.35	35.8667	35.5467	35.98	36.21	36.0067	34.5133	36.1467	35.62	36.3167		36.97	36.07	35.7
0.633333	36.0933	36.3067	35.79	35.6033	35.8933	36.19	35.9867	34.4833	36.08	35.61	36.1967		36.9667	36.09	35.6167
0.65	36.1	36.2933	35.6433	35.6767	35.86	36.1833	35.9233	34.5	36.0733	35.6267	36.1033		36.9467	36.0867	35.5233
0.666667	36.1367	36.3067	35.5567	35.7033	35.84	36.2033	35.9667	34.4867	36.0967	35.6533	36.04		36.9433	36.1333	35.4933
0.683333	36.17	36.23	35.5333	35.7167	35.86	36.1967	35.9867	34.5033	36.08	35.6667	36.0067		36.91	36.29	35.5133
0.7	36.3267	36.1867	35.5067	35.7367	35.8433	36.1833	35.9633	34.5767	36.0567	35.7033	35.9533		36.81	36.4267	35.5667
0.716667	36.44	36.2267	35.4567	35.8367	35.8333	36.1533	36.0033	34.5567	36.0433	35.72	35.9167		36.7167	36.45	35.61
0.733333	36.3833	36.2933	35.44	35.81	35.7967	36.11	36.0533	34.51	36.06	35.8167	35.91		36.7633	36.4133	35.6133
0.75	36.33	36.2833	35.42	35.7667	35.73	36.0533	36.07	34.67	36.0833	35.9467	35.9333		36.7567	36.4	35.6333
0.766667	36.3467	36.2467	35.4467	35.72	35.7233	36.0033	36.0667	34.7967	36.1233	35.95	35.8467		36.5767	36.4	35.5933
0.783333	36.36	36.2767	35.4933	35.67	35.7267	35.9533	35.99	34.89	36.1967	35.9567	35.7733		36.2733	36.3533	35.5333
0.8	36.3067	36.2833	35.5467	35.6467	35.77	35.8967	35.91	34.8867	36.2433	35.9133	35.7833		36.08	36.2967	35.4667
0.816667	36.2467	36.2867	35.5467	35.69	35.8233	35.8467	35.8967	34.7633	36.2167	35.8933	35.7867		35.9233	36.26	35.4367
0.833333	36.1633	36.2733	35.5133	35.73	35.8	35.7933	35.9033	34.7233	36.2067	35.8633	35.7733		35.8	36.2267	35.45
0.85	36.1367	36.31	35.52	35.7467	35.72	35.7933	35.8533	34.68	36.2267	35.82	35.74		35.7767	36.1567	35.4467
0.866667	36.1133	36.3367	35.59	35.75	35.6167	35.7733	35.79	34.64	36.1233	35.8	35.7067		35.74	36.09	35.3733
0.883333	36.0967	36.3533	35.66	35.7633	35.5967	35.7333	35.75	34.6267	35.93	35.78	35.7367		35.6433	36.0267	35.3433
0.9	36.1167	36.3367	35.74	35.7633	35.6067	35.6667	35.7133	34.5967	35.88	35.7867	35.7733		35.52	35.9633	35.2633
0.916667	36.09	36.3233	35.7833	35.75	35.67	35.66	35.6733	34.5833	35.9033	35.83	35.7033		35.4	35.9067	35.2333
0.933333	36.0367	36.3067	35.8033	35.7667	35.75	35.7733	35.63	34.58	35.9133	35.88	35.6567		35.4767	35.8633	35.26
0.95	35.98	36.3	35.8033	35.8067	35.74	35.8067	35.5933	34.5667	35.8767	35.9767	35.66		35.5567	35.8467	35.2867
0.966667	35.93	36.2867	35.7867	35.85	35.73	35.8167	35.5633	34.5567	35.8367	35.98	35.6667		35.5767	35.8167	35.33
0.983333	35.8433	36.2367	35.79	35.7833	35.75	35.7933	35.5333	34.5667	35.7867	35.9567	35.6133		35.52	35.78	35.3367
1	35.7967	36.1833	35.7733	35.69	35.6967	35.7	35.5033	34.5933	35.74	35.9233	35.55		35.4967	35.7467	35.4067
1.01667	35.7333	36.1267	35.7567	35.6267	35.67	35.6333	35.4667	34.59	35.7067	35.9	35.5233		35.5733	35.71	35.35
1.03333	35.69	36.0633	35.7367	35.4733	35.6333	35.6133	35.4367	34.5567	35.6533	35.87	35.5167		35.7167	35.59	35.2433
1.05	35.58	36.0667	35.7333	35.3267	35.5833	35.6467	35.4667	34.5533	35.5433	35.86	35.4833		35.9067	35.4667	35.2667
1.06667	35.5533	36.1067	35.7367	35.2567	35.5367	35.6667	35.52	34.6	35.4867	35.8333	35.4333		35.95	35.4567	35.4767
1.08333	35.57	36.08	35.7233	35.1267	35.4967	35.66	35.5567	34.6633	35.4433	35.7267	35.3933		35.9833	35.46	35.5867
1.1	35.6067	36	35.7233	35.13	35.4467	35.6267	35.5733	34.72	35.4367	35.6933	35.37		36.05	35.36	35.67
1.11667	35.6933	35.9767	35.72	35.28	35.3633	35.61	35.59	34.7967	35.44	35.72	35.3333		36.07	35.2567	35.6667
1.13333	35.8	36	35.6133	35.4033	35.3	35.6333	35.6	34.81	35.4533	35.7333	35.3333		36.0367	35.37	35.6467
1.15	35.8	35.9433	35.48	35.56	35.2867	35.6133	35.58	34.84	35.4533	35.7933	35.3167		36.0133	35.4533	35.5967
1.16667	35.8	35.9633	35.4133	35.7167	35.2767	35.5833	35.5633	35.0133	35.44	35.82	35.2333		35.9867	35.4833	35.48
1.18333	35.89	35.94	35.35	35.7533	35.2833	35.5267	35.5567	35.1233	35.4533	35.8067	35.18		35.9533	35.4467	35.39
1.2	35.95	35.8767	35.32	35.6867	35.2933	35.4567	35.56	35.17	35.4433	35.79	35.1233		35.9033	35.4	35.3333
1.21667	35.9733	35.8267	35.33	35.53	35.3167	35.4233	35.5733	35.1467	35.45	35.8167	35.1133		35.7833	35.4133	35.3067
1.23333	35.9667	35.7867	35.3367	35.4933	35.3133	35.41	35.6067	35.1333	35.4567	35.84	35.15		35.6767	35.4667	35.2933
1.25	35.95	35.7133	35.3733	35.4933	35.2833	35.3867	35.7	35.0567	35.4567	35.74	35.2133		35.6167	35.3333	35.2667
1.26667	35.9233	35.71	35.53	35.5167	35.2733	35.3667	35.72	35.0867	35.4533	35.75	35.22		35.5733	35.2167	35.2367
1.28333	35.9	35.6933	35.6133	35.54	35.2433	35.3367	35.71	35.1433	35.4433	35.7867	35.21		35.5067	35.1567	35.2033
1.3	35.8933	35.68	35.6433	35.5633	35.22	35.2867	35.6933	35.18	35.43	35.7867	35.1967		35.44	35.1633	35.17
1.31667	35.8633	35.7533	35.7067	35.5533	35.19	35.23	35.69	35.1633	35.43	35.7867	35.18		35.31	35.16	35.1567
1.33333	35.8333	35.8033	35.7367	35.49	35.18	35.1733	35.6833	35.1367	35.4233	35.8567	35.1533		35.25	35.2367	35.1367
1.35	35.8167	35.8367	35.6567	35.3333	35.22	35.1433	35.6633	35.0867	35.4067	35.9067	35.1467		35.2233	35.2733	35.17
1.36667	35.8133	35.8367	35.6767	35.2433	35.2867	35.1533	35.63	35.05	35.4333	36	35.1867		35.19	35.35	35.2233
1.38333	35.83	35.82	35.8233	35.1867	35.2633	35.1767	35.6033	35.04	35.4367	36.0367	35.15		35.17	35.4067	35.22
1.4	35.8267	35.8067	35.6733	35.2	35.2333	35.17	35.5933	35.03	35.4133	36.0367	35.0867		35.14	35.6633	35.17
1.41667	35.8	35.7967	35.5733	35.2233	35.2367	35.1633	35.59	35.02	35.4067	36.0333	35.0267		35.1367	35.6867	35.1167
1.43333	35.78	35.7667	35.9033	35.2333	35.2367	35.1667	35.6667	35.0067	35.4367	36.0433	35.0167		35.18	35.6467	35.11
1.45	35.7767	35.7167	36.0333	35.22	35.16	35.1667	35.6833	35	35.5467	36.12	35.0067		35.1767	35.77	35.08
1.46667	35.77	35.6867	35.6467	35.2033	35.07	35.14	35.6767	35	35.5633	36.1167	34.9567		35.16	35.8967	35
1.48333	35.7467	35.6533	35.7267	35.19	35.01	35.1233	35.7433	34.97	35.55	36.0867	34.93		35.15	35.96	34.9133
1.5	35.7067	35.6567	35.82	35.1833	34.97	35.17	35.87	34.9567	35.5067	36.03	34.94		35.1433	35.9333	34.8867
1.51667	35.6633	35.63	35.7233	35.19	34.9433	35.1833	35.89	34.97	35.4967	35.9733	34.94		35.15	35.9333	34.87
1.53333	35.65	35.5833	35.67	35.2	34.93	35.16	35.9033	34.9567	35.5133	35.9333	34.9233		35.1833	35.9967	35.03
1.55	35.64	35.5233	35.6367	35.24	35.05	35.1167	35.91	34.9433	35.5067	35.9033	34.9333		35.2067	36.0233	35.3267
1.56667	35.6267	35.51	35.6067	35.3033	35.0833	35.1067	35.9067	34.96	35.49	35.8267	34.95		35.22	36	35.3867
1.58333	35.6133	35.4933	35.58	35.2933	35.11	35.2133	35.9267	34.88	35.5033	35.76	34.9		35.2267	35.93	35.39
1.6	35.59	35.44	35.5933	35.21	35.1333	35.2267	35.95	34.7867	35.5267	35.74	34.8567		35.22	35.8833	35.4033
1.61667	35.56	35.36	35.6167	35.1	35.1467	35.22	35.9633	34.7967	35.53	35.7733	34.9133		35.2167	35.8833	35.4433
1.63333	35.5267	35.38	35.58	34.9733	35.1433	35.22	35.9167	34.7967	35.5167	35.8133	35.0267		35.1967	35.8733	35.4733
1.65	35.49	35.37	35.5667	34.8633	35.1367	35.2	35.8833	34.7967	35.4967	35.8433	35.0633		35.1567	35.85	35.4767
1.66667	35.47	35.3333	35.57	34.79	35.14	35.1733	35.87	34.7867	35.47	35.84	35.0767		35.0967	35.7933	35.4733
1.68333	35.4467	35.4267	35.63	34.7767	35.1333	35.16	35.83	34.7967	35.4433	35.79	35.1067		35.0733	35.74	35.45
1.7	35.4167	35.4433	35.77	34.84	35.1367	35.18	35.78	34.79	35.3833	35.7533	35.1		35.1133	35.6733	35.4267
1.71667	35.3967	35.44	35.8167	34.84	35.1733	35.1867	35.76	34.7833	35.35	35.6767	35.0767		35.12	35.55	35.42
1.73333	35.3933	35.49	35.8333	34.8967	35.1567	35.1833	35.7433	34.8167	35.34	35.61	35.0433		35.1133	35.4867	35.42
1.75	35.39	35.56	35.82	35.1	35.07	35.1733	35.7067	34.8167	35.36	35.5633	35.0233		35.0967	35.4367	35.4233
1.76667	35.3933	35.6333	35.8067	35.21	35.0333	35.2	35.6833	34.7533	35.3533	35.5367	34.9667		35.0667	35.4133	35.43
1.78333	35.38	35.63	35.7733	35.3033	35.01	35.2533	35.6667	34.7333	35.3833	35.4933	34.92		35.0467	35.4467	35.4367
1.8	35.36	35.58	35.7433	35.4467	34.94	35.2667	35.6633	34.7467	35.4	35.43	34.9233		35.04	35.43	35.44
1.81667	35.3267	35.56	35.6967	35.5033	34.8933	35.2367	35.65	34.7433	35.4067	35.37	34.96		35.0267	35.4033	35.45
1.83333	35.2967	35.59	35.6833	35.26	34.8467	35.2233	35.6333	34.7433	35.41	35.31	34.9467		35.0033	35.4167	35.4267
1.85	35.3067	35.62	35.69	35.1833	34.86	35.2	35.6167	34.77	35.3933	35.41	34.9333		34.98	35.4333	35.4
1.86667	35.33	35.6067	35.6833	35.1633	34.8767	35.1767	35.59	34.7767	35.38	35.4967	34.9267		34.9567	35.4233	35.38
1.88333	35.33	35.5633	35.7433	35.1433	34.8833	35.1433	35.5767	34.7567	35.3533	35.5167	34.9133		34.9333	35.38	35.3667
1.9	35.3367	35.5133	35.8267	35.08	34.8767	35.1167	35.52	34.72	35.3567	35.5033	34.91		34.9667	35.3533	35.3567
1.91667	35.4033	35.5167	35.8233	35.05	34.8633	35.0867	35.5133	34.7	35.3733	35.5	34.8933		34.9733	35.3167	35.3533
1.93333	35.4933	35.5167	35.6767	35.1067	34.8433	35.05	35.52	34.7067	35.38	35.5067	34.83		34.9633	35.29	35.3467
1.95	35.5933	35.51	35.6133	35.1733	34.7667	35.01	35.5167	34.7167	35.3533	35.53	34.7633		34.96	35.3033	35.3267
1.96667	35.62	35.5067	35.5433	35.2133	34.7133	35.0067	35.52	34.71	35.2767	35.5433	34.77		34.9567	35.4167	35.29
1.98333	35.63	35.4867	35.5433	35.2633	34.71	35	35.5267	34.6267	35.2333	35.5667	34.83		34.9467	35.44	35.35
2	35.7367	35.49	35.57	35.3667	34.7167	34.9833	35.5233	34.5667	35.2267	35.5733	34.96		34.9367	35.4033	35.42
2.01667	35.78	35.5033	35.5633	35.3767	34.72	34.96	35.51	34.36	35.2567	35.5767	34.97		34.9333	35.32	35.4133
2.03333	35.8233	35.49	35.6233	35.2833	34.7167	34.9567	35.4967	34.31	35.2767	35.58	34.9167		34.92	35.2833	35.4767
2.05	35.82	35.4733	35.6767	35.12	34.7167	34.9533	35.4833	34.3333	35.29	35.55	34.8267		34.8933	35.3033	35.47
2.06667	35.8033	35.4467	35.5767	34.9867	34.7267	34.9367	35.49	34.3233	35.3567	35.4967	34.77		35.0533	35.32	35.5133
2.08333	35.7833	35.41	35.3867	34.9333	34.7533	34.92	35.5167	34.2867	35.3633	35.4433	34.7		35.11	35.3933	35.5467
2.1	35.77	35.3767	35.3733	34.9233	34.7467	34.91	35.5667	34.2367	35.3333	35.4433	34.6467		35.13	35.3367	35.5733
2.11667	35.7567	35.34	35.4233	34.9167	34.7333	34.8867	35.5667	34.2467	35.2667	35.46	34.6067		35.1333	35.19	35.6133
2.13333	35.73	35.3167	35.51	34.9133	34.86	34.88	35.51	34.21	35.1967	35.43	34.5267		35.1267	35.01	35.6467
2.15	35.7367	35.3267	35.4933	34.9467	34.96	34.8767	35.47	34.1733	35.1667	35.4067	34.5233		35.1033	34.8733	35.62
2.16667	35.7733	35.33	35.4367	35.05	34.97	34.8767	35.4533	34.1967	35.1467	35.4133	34.5333		35.0467	34.8467	35.5567
2.18333	35.7433	35.3333	35.46	35.12	34.95	34.8867	35.4233	34.22	35.1233	35.43	34.52		35.01	34.9433	35.57
2.2	35.7	35.3133	35.4733	35.1533	34.9433	34.88	35.38	34.2367	35.1	35.4433	34.55		34.9967	35.0133	35.6167
2.21667	35.6767	35.3033	35.4667	35.1467	34.9133	34.8667	35.3933	34.2267	35.2067	35.4467	34.6067		34.9933	35.1367	35.6433
2.23333	35.6733	35.29	35.41	35.17	34.8733	34.8567	35.4267	34.3667	35.21	35.4667	34.65		34.9767	35.18	35.6433
2.25	35.69	35.29	35.37	35.1933	34.8567	34.8467	35.4733	34.5033	35.1867	35.51	34.6667		34.97	35.09	35.6233
2.26667	35.7	35.28	35.3767	35.2867	34.86	34.8267	35.53	34.7	35.1167	35.57	34.72		34.9533	35.08	35.5933
2.28333	35.7067	35.2667	35.37	35.3967	34.8767	34.8	35.4667	34.8167	35.05	35.6	34.7933		34.9367	35.13	35.5567
2.3	35.7133	35.3367	35.5033	35.48	34.9233	34.8667	35.4367	34.86	35.0167	35.59	34.86		34.9367	35.21	35.5667
2.31667	35.73	35.3967	35.5167	35.5067	34.9	35.0133	35.3567	34.8567	34.9933	35.5867	34.8733		34.9367	35.34	35.55
2.33333	35.76	35.4067	35.5933	35.5	34.8967	35.11	35.33	34.85	34.97	35.5933	34.87		34.95	35.4667	35.5133
2.35	35.7667	35.43	35.6167	35.49	34.9333	35.16	35.36	34.8667	34.9367	35.6467	34.8567		34.9633	35.51	35.49
2.36667	35.77	35.4433	35.59	35.4767	34.9967	35.2133	35.35	34.86	34.8933	35.75	34.85		34.9767	35.5167	35.4333
2.38333	35.7667	35.3967	35.61	35.51	35.0633	35.1967	35.4233	34.91	34.8467	35.78	35.0033		35.0233	35.51	35.4333
2.4	35.7533	35.33	35.66	35.5333	35.0767	35.1733	35.5267	34.95	34.81	35.7767	35.0067		35.06	35.5333	35.4633
2.41667	35.7167	35.2733	35.6067	35.53	35.0767	35.1567	35.5633	34.9667	34.7833	35.75	34.91		35.0667	35.4633	35.47
2.43333	35.67	35.2333	35.55	35.4467	35.07	35.0733	35.58	34.8967	34.76	35.7267	34.7733		35.09	35.39	35.46
2.45	35.6333	35.33	35.4967	35.37	35.0533	35.0967	35.5567	34.8333	34.7667	35.7267	34.7467		35.1567	35.5133	35.43
2.46667	35.5167	35.4267	35.4567	35.3633	35.0367	35.1267	35.5467	34.8267	34.7833	35.7167	34.7633		35.17	35.5333	35.38
2.48333	35.3733	35.4833	35.46	35.3433	35.0267	35.13	35.59	34.7967	34.7933	35.6833	34.77		35.17	35.6133	35.3167
2.5	35.3533	35.4833	35.5067	35.3067	35.0033	35.1033	35.6433	34.7467	34.8033	35.6667	34.84		35.1633	35.7933	35.3033
2.51667	35.36	35.4733	35.56	35.2833	34.9667	35.08	35.6933	34.7267	34.8433	35.7	34.9033		35.1567	35.86	35.2967
2.53333	35.3367	35.4567	35.5567	35.2667	34.9533	35.05	35.7133	34.69	34.9033	35.6867	35.01		35.17	35.8533	35.2833
2.55	35.3833	35.4533	35.5767	35.2867	34.96	35.01	35.74	34.63	34.8833	35.67	35.1767		35.15	35.9467	35.2633
2.56667	35.3433	35.43	35.5533	35.27	34.9533	34.9733	35.7067	34.59	34.88	35.6667	35.2133		35.13	35.9667	35.2333
2.58333	35.2733	35.42	35.4833	35.2533	34.9533	34.9633	35.6267	34.5967	34.94	35.64	35.22		35.13	35.8733	35.19
2.6	35.2633	35.3967	35.4833	35.3033	34.9633	34.9633	35.6367	34.6767	34.9833	35.5933	35.2133		35.15	35.8067	35.16
2.61667	35.2067	35.3433	35.5133	35.3933	34.9667	34.9533	35.6467	34.7633	35.0833	35.5633	35.2433		35.1733	35.7567	35.1667
2.63333	35.1833	35.3067	35.5	35.4233	34.97	34.9367	35.6233	34.82	35.21	35.57	35.3533		35.18	35.72	35.1733
2.65	35.1933	35.2867	35.48	35.4267	34.98	34.95	35.5867	34.86	35.2367	35.57	35.46		35.17	35.6867	35.16
2.66667	35.1667	35.27	35.5033	35.4433	34.9733	34.93	35.5833	34.9267	35.22	35.5567	35.4933		35.1667	35.6333	35.12
2.68333	35.1233	35.2433	35.57	35.4667	34.9633	34.9133	35.6167	35.06	35.2367	35.5433	35.49		35.17	35.5933	35.1067
2.7	35.1333	35.2233	35.64	35.4833	34.95	34.9	35.63	35.04	35.2633	35.5167	35.4567		35.1767	35.5467	35.0967
2.71667	35.1233	35.2033	35.67	35.4633	34.94	34.89	35.64	34.9133	35.2867	35.51	35.47		35.2067	35.4933	35.0933
2.73333	35.2167	35.1867	35.6833	35.4433	34.92	34.88	35.6467	34.8333	35.3067	35.4867	35.51		35.2333	35.4533	35.0967
2.75	35.23	35.1833	35.6767	35.3967	34.8933	34.8833	35.65	34.7467	35.4	35.4533	35.61		35.2333	35.42	35.1267
2.76667	35.1867	35.2	35.64	35.17	34.8767	34.9133	35.6433	34.5633	35.4233	35.4367	35.69		35.2033	35.4133	35.1567
2.78333	35.1133	35.1867	35.6167	35.0033	34.87	34.91	35.64	34.3767	35.4167	35.4367	35.72		35.1433	35.4433	35.1733
2.8	35.0667	35.1733	35.5967	34.9333	34.8767	34.9067	35.6333	34.3033	35.41	35.4567	35.7567		35.11	35.44	35.2167
2.81667	35.0167	35.15	35.58	34.93	34.8767	34.9167	35.6267	34.29	35.49	35.4733	35.8567		35.1233	35.4433	35.2933
2.83333	34.98	35.1367	35.54	34.9867	34.8733	34.95	35.5833	34.32	35.5233	35.48	35.9033		35.14	35.47	35.3433
2.85	34.9567	35.1267	35.52	35.0133	34.8933	34.9533	35.5567	34.3567	35.4767	35.4933	35.9233		35.13	35.4533	35.43
2.86667	34.95	35.11	35.5	34.9433	34.9167	34.9067	35.5767	34.38	35.46	35.55	35.9333		35.11	35.44	35.4933
2.88333	34.9333	35.08	35.4733	34.85	34.9833	34.8667	35.6067	34.4067	35.4733	35.5833	35.96		35.0733	35.46	35.5967
2.9	34.9967	35.0433	35.4567	34.7667	35.0333	34.84	35.58	34.4833	35.46	35.59	35.9567		35.05	35.4667	35.6667
2.91667	34.99	35.01	35.4533	34.6833	35.07	34.7733	35.5067	34.5033	35.4467	35.59	35.98		35.05	35.46	35.75
2.93333	34.9833	34.9867	35.4867	34.6933	35.1633	34.7133	35.3633	34.5633	35.48	35.52	36.0467		35.06	35.4567	35.8133
2.95	34.9833	34.9567	35.5667	34.6933	35.1633	34.7	35.3367	34.64	35.4933	35.4967	36.0667		35.14	35.4667	35.89
2.96667	34.95	34.9433	35.5767	34.7433	35.16	34.66	35.39	34.6733	35.4467	35.52	36.05		35.2167	35.4867	35.9233
2.98333	34.89	34.9267	35.5267	34.92	35.1367	34.6	35.3867	34.73	35.4633	35.52	36.1367		35.3033	35.4833	35.9233
3	34.8433	34.89	35.3867	35.0133	35.1067	34.6133	35.3633	34.7433	35.5133	35.52	36.1033		35.3667	35.4633	35.8733
3.01667	34.8167	34.88	35.3067	35.01	35.09	34.6767	35.3433	34.7067	35.51	35.5233	36.11		35.4233	35.45	35.8367
3.03333	34.9233	34.8467	35.2533	35.04	35.0833	34.77	35.3567	34.6967	35.5	35.51	36.1467		35.4433	35.4933	35.8467
3.05	34.9433	34.9	35.1867	35.08	35.0433	34.7633	35.3833	34.7133	35.5067	35.5367	36.2067		35.4433	35.49	35.8633
3.06667	34.9467	35.0433	35.21	35.1167	35	34.7833	35.4133	34.7433	35.5067	35.5867	36.21		35.4067	35.4867	35.8733
3.08333	34.96	35.1367	35.3567	35.09	35.0433	34.85	35.4367	34.7433	35.5033	35.57	36.1767		35.4033	35.4733	35.8567
3.1	35.0033	35.18	35.3833	35.0467	35.1333	34.8833	35.4333	34.7233	35.4867	35.57	36.1		35.4267	35.4667	35.74
3.11667	35.0767	35.2	35.4	35.03	35.1433	34.8733	35.4233	34.6967	35.47	35.61	36.0233		35.44	35.5033	35.54
3.13333	35.0733	35.19	35.4633	35	35.15	34.8633	35.46	34.6833	35.4467	35.64	35.9933		35.4733	35.5433	35.41
3.15	35.0133	35.17	35.5233	34.83	35.19	34.8333	35.4333	34.6733	35.44	35.6967	35.9667		35.5067	35.6067	35.4333
3.16667	34.9667	35.14	35.4967	34.7233	35.2733	34.78	35.3433	34.6767	35.4567	35.7167	36.0033		35.52	35.65	35.4867
3.18333	34.9633	35.15	35.5833	34.6467	35.31	34.7333	35.35	34.6567	35.5733	35.7	36.04		35.51	35.6467	35.4033
3.2	35	35.21	35.71	34.7733	35.3267	34.75	35.6	34.6133	35.61	35.6567	36.0467		35.5067	35.59	35.3533
3.21667	35.05	35.2	35.6067	34.8467	35.3267	34.7667	35.5667	34.5767	35.63	35.6267	35.97		35.4833	35.5033	35.26
3.23333	35.04	35.1867	35.5033	34.8933	35.3067	34.75	35.4767	34.5933	35.6967	35.62	35.8367		35.4267	35.4767	35.2867
3.25	35.0267	35.1967	35.54	34.98	35.3167	34.7	35.46	34.6233	35.8	35.5967	35.88		35.3667	35.48	35.55
3.26667	35.0167	35.1833	35.54	35.0633	35.3267	34.75	35.4533	34.6367	35.8367	35.5067	35.9533		35.3367	35.42	35.78
3.28333	35.0133	35.0967	35.54	35.1467	35.3333	34.7767	35.4333	34.6633	35.8567	35.4067	35.8967		35.29	35.3733	35.92
3.3	35.0367	35.06	35.5867	35.2067	35.3467	34.7967	35.43	34.69	35.9067	35.44	35.7367		35.2467	35.51	35.88
3.31667	35.0267	35.1133	35.63	35.2767	35.3367	34.8033	35.4267	34.72	35.9833	35.51	35.6567		35.2133	35.6733	35.92
3.33333	35.02	35.15	35.67	35.4067	35.3167	34.8	35.4233	34.7333	36.0433	35.5033	35.6433		35.1667	35.7	35.9533
3.35	35.0433	35.1567	35.6967	35.52	35.2667	34.7867	35.41	34.74	36.07	35.51	35.6233		35.1333	35.73	35.9567
3.36667	35.0433	35.0967	35.6867	35.5867	35.23	34.79	35.3667	34.76	36.06	35.5333	35.61		35.1033	35.7567	35.9033
3.38333	35.0333	34.9267	35.6733	35.6233	35.2067	34.82	35.3267	34.7933	36.0367	35.54	35.5767		35.0733	35.7967	35.8767
3.4	35	34.9867	35.65	35.67	35.17	34.81	35.31	34.84	36.0133	35.6133	35.5567		35.0433	35.8333	35.9033
3.41667	34.97	35.1	35.6167	35.69	35.1067	34.7967	35.2833	34.8733	35.9867	35.6267	35.5733		34.9933	35.83	35.89
3.43333	34.96	35.0733	35.6	35.6833	35.07	34.76	35.2867	34.9333	35.9533	35.6233	35.62		34.9133	35.7833	35.8967
3.45	34.94	34.9867	35.5967	35.6467	35.09	34.72	35.3333	34.9567	35.9233	35.6167	35.6433		34.8533	35.73	35.92
3.46667	34.88	35.0433	35.5967	35.62	35.13	34.6933	35.3967	34.94	35.94	35.5967	35.6833		34.8	35.6867	35.92
3.48333	34.8633	35.1733	35.5933	35.57	35.14	34.68	35.42	34.9167	35.9933	35.5733	35.7267		34.7767	35.6367	35.9467
3.5	34.8633	35.2533	35.62	35.52	35.1167	34.6633	35.45	34.8	35.9967	35.59	35.7667		34.74	35.59	35.9567
3.51667	34.8933	35.32	35.6067	35.47	35.11	34.6267	35.4567	34.7467	35.9867	35.6067	35.7867		34.7167	35.5133	35.95
3.53333	34.98	35.4033	35.5967	35.4333	35.22	34.5967	35.4333	34.73	35.9567	35.51	35.82		34.6867	35.4033	35.85
3.55	35.0167	35.51	35.58	35.4167	35.28	34.5867	35.3067	34.7267	35.9467	35.46	35.8167		34.7	35.34	35.75
3.56667	35.02	35.4867	35.55	35.3767	35.2933	34.58	35.2	34.7333	35.9533	35.4533	35.7933		34.7233	35.34	35.6533
3.58333	35.0133	35.43	35.51	35.3767	35.2833	34.5867	35.1633	34.76	36.0567	35.4167	35.76		34.6833	35.3367	35.5833
3.6	35.0067	35.3967	35.4733	35.37	35.2567	34.5833	35.1833	34.8167	36.0767	35.5	35.7333		34.6867	35.3367	35.5467
3.61667	34.9533	35.41	35.4667	35.34	35.22	34.5733	35.2367	34.8267	36.04	35.5667	35.7267		34.7	35.4133	35.53
3.63333	34.9	35.4733	35.4467	35.3467	35.21	34.5633	35.2433	34.87	36	35.66	35.6667		34.7133	35.5133	35.4067
3.65	34.86	35.48	35.37	35.39	35.2433	34.5167	35.23	34.94	35.9733	35.71	35.5633		34.7533	35.5533	35.3133
3.66667	34.8367	35.46	35.2833	35.39	35.2767	34.5	35.22	34.9633	35.94	35.6767	35.5067		34.76	35.56	35.2067
3.68333	34.8067	35.44	35.27	35.3633	35.2933	34.49	35.2033	34.9433	35.9133	35.6033	35.46		34.7533	35.5767	35.1467
3.7	34.7967	35.43	35.3	35.2967	35.27	34.51	35.1733	34.83	35.9333	35.6233	35.4133		34.78	35.6067	35.1233
3.71667	34.77	35.3933	35.3167	35.2333	35.24	34.6367	35.1767	34.7367	35.9333	35.6733	35.38		34.8367	35.62	35.1333
3.73333	34.7233	35.35	35.32	35.1967	35.2067	34.7133	35.18	34.7	35.91	35.6967	35.34		34.89	35.6733	35.1233
3.75	34.7033	35.36	35.3367	35.1767	35.1633	34.8133	35.1533	34.6433	35.8933	35.6667	35.28		34.9433	35.7067	35.1567
3.76667	34.7967	35.3567	35.3533	35.1733	35.12	34.9633	35.1367	34.56	35.8933	35.7	35.23		35	35.72	35.1767
3.78333	34.8267	35.29	35.3467	35.1667	35.0867	35.0367	35.11	34.6167	35.9067	35.6833	35.2067		35.08	35.69	35.2
3.8	34.84	35.2533	35.3533	35.1533	35.0533	35.0467	35.0933	34.67	35.9267	35.5933	35.1867		35.1133	35.6733	35.32
3.81667	34.8467	35.2433	35.3633	35.1467	35.01	35.1067	35.0767	34.6733	35.88	35.5633	35.18		35.0867	35.77	35.4967
3.83333	34.86	35.25	35.3567	35.1367	34.9733	35.1533	35.0633	34.6833	35.84	35.5933	35.17		35.05	35.84	35.5
3.85	34.9033	35.2667	35.35	35.1467	34.9133	35.07	35.06	34.66	35.8633	35.5833	35.1367		35.04	35.8833	35.4633
3.86667	34.9333	35.2567	35.3333	35.1667	34.9233	34.9867	35.03	34.58	35.8467	35.6533	35.0433		35.0567	35.9	35.51
3.88333	34.9467	35.2367	35.33	35.1667	34.8967	34.99	35.0667	34.55	35.8833	35.6467	35.03		35.09	35.87	35.5933
3.9	34.9833	35.2833	35.3433	35.1533	34.8733	35.04	35.1367	34.5233	35.8333	35.58	35.0433		35.14	35.8033	35.7167
3.91667	35.06	35.31	35.3267	35.1267	34.8533	35.08	35.1433	34.4767	35.7733	35.6567	35.06		35.16	35.8233	35.8933
3.93333	35.1133	35.35	35.2633	35.0167	34.8267	35.0833	35.1267	34.46	35.78	35.7833	35.0633		35.25	35.8633	35.8767
3.95	35.1233	35.3533	35.27	34.88	34.79	35.02	35.1633	34.43	35.8033	35.9133	35.06		35.2867	35.8867	35.79
3.96667	35.11	35.33	35.3733	34.84	34.7433	34.9533	35.19	34.4533	35.89	35.9133	35.0533		35.1567	35.8967	35.7667
3.98333	35.1133	35.3567	35.39	34.8133	34.7033	35.0367	35.2	34.4933	35.9933	36.0067	35.0433		34.9467	35.99	35.68
4	35.19	35.4133	35.3167	34.8467	34.67	35.0667	35.23	34.5733	36	36.1467	35.03		34.8767	36.0833	35.7433
4.01667	35.2633	35.4133	35.3067	34.8333	34.6533	35.0733	35.2633	34.6033	35.9367	36.1933	35.0167		34.8433	36.1467	35.77
4.03333	35.3333	35.44	35.3867	34.8267	34.6733	35.1033	35.2767	34.5533	35.9867	36.1333	35.0333		34.8133	36.1667	35.7533
4.05	35.3667	35.47	35.45	34.8367	34.7	35.14	35.2933	34.51	36.04	36.05	35.0167		34.7933	36.0733	35.7067
4.06667	35.4167	35.4267	35.4633	34.7867	34.6733	35.2633	35.3233	34.4333	36.0533	35.9933	34.97		34.8033	35.9633	35.6533
4.08333	35.47	35.39	35.5733	34.7767	34.6567	35.2967	35.34	34.5233	36.05	35.9567	34.9533		34.7867	35.91	35.59
4.1	35.49	35.3767	35.6433	34.8367	34.66	35.2433	35.34	34.5467	36.0433	35.9067	34.9667		34.8433	35.8633	35.5933
4.11667	35.52	35.3567	35.5667	34.9467	34.69	35.19	35.3633	34.6533	36.0133	35.8167	34.9833		34.8967	35.81	35.7233
4.13333	35.56	35.36	35.5967	34.9933	34.7533	35.19	35.4	34.8133	35.9733	35.7667	34.9967		34.9	35.7533	35.7567
4.15	35.5867	35.35	35.6	35.08	34.8467	35.18	35.43	34.91	35.9533	35.74	35.0133		34.94	35.6767	35.79
4.16667	35.5767	35.2833	35.56	35.12	34.9067	35.0467	35.4733	34.9733	35.9267	35.7067	35.0267		35.0767	35.6033	35.9
4.18333	35.58	35.2333	35.56	35.13	34.9767	34.99	35.51	34.95	35.9167	35.65	35.0367		35.2033	35.54	36.0667
4.2	35.6567	35.1567	35.56	35.1467	35.0167	34.9367	35.5167	34.92	36.0033	35.5633	35.0667		35.3067	35.4933	36.1267
4.21667	35.66	35.0267	35.54	35.1633	35.0033	34.8367	35.52	34.9233	36.1267	35.5533	35.12		35.4567	35.4967	36.15
4.23333	35.6567	34.95	35.5333	35.1233	35.02	34.8	35.54	34.9533	36.1433	35.5133	35.1467		35.5	35.4767	36.2433
4.25	35.63	34.8933	35.5233	35.12	35.0567	34.7567	35.55	34.9667	36.1267	35.44	35.1533		35.4433	35.44	36.26
4.26667	35.61	34.85	35.4833	35.1667	35.0733	34.6967	35.4933	34.9967	36.11	35.35	35.12		35.4333	35.41	36.21
4.28333	35.6567	34.78	35.4733	35.1533	35.0733	34.6467	35.46	35.0733	36.1133	35.2867	35.05		35.57	35.3967	36.1633
4.3	35.69	34.7067	35.4733	35.1333	35.05	34.5933	35.44	35.1233	36.0767	35.2633	34.9833		35.7367	35.3833	36.1167
4.31667	35.6933	34.7033	35.4833	35.1533	34.9967	34.55	35.4267	35.1667	35.9867	35.3067	34.94		35.81	35.39	36.01
4.33333	35.6767	34.7267	35.54	35.1433	34.9533	34.52	35.45	35.1533	35.9733	35.3367	34.92		35.9	35.3867	35.98
4.35	35.6933	34.74	35.51	35.1067	34.9633	34.52	35.4333	35.0933	35.97	35.39	34.8867		36	35.3967	36.01
4.36667	35.7	34.7267	35.44	35.0633	35.01	34.56	35.4133	34.98	35.93	35.46	34.8633		36.07	35.47	36.0033
4.38333	35.72	34.69	35.44	35.0567	35.07	34.5767	35.3833	34.8967	35.87	35.52	34.8533		36.17	35.4733	35.9233
4.4	35.7833	34.6533	35.4267	35.0733	35.0933	34.57	35.3167	34.8833	35.8467	35.5667	34.8633		36.2133	35.4633	35.7367
4.41667	35.78	34.7133	35.4133	35.0367	35.1133	34.5533	35.2233	34.8667	35.8333	35.6033	34.8767		36.2333	35.5267	35.6033
4.43333	35.7767	34.79	35.4833	34.99	35.1233	34.54	35.17	34.8333	35.7967	35.6433	34.89		36.2333	35.4733	35.49
4.45	35.7767	34.8467	35.5333	34.98	35.1067	34.56	35.1533	34.82	35.74	35.6467	34.8933		36.2767	35.3	35.47
4.46667	35.7633	34.85	35.4833	34.9933	35.1	34.6367	35.16	34.82	35.67	35.6667	34.87		36.2733	35.2967	35.45
4.48333	35.7933	34.8433	35.4433	35.0233	35.1133	34.77	35.19	34.84	35.6767	35.6533	34.8467		36.22	35.2967	35.4667
4.5	35.81	34.8333	35.6233	35.0233	35.1367	34.7833	35.0733	34.89	35.7233	35.6067	34.86		36.15	35.2667	35.6567
4.51667	35.77	34.8233	35.7167	35.05	35.1533	34.7833	34.9933	34.8567	35.72	35.5967	34.91		36.16	35.2733	35.6967
4.53333	35.6867	34.7967	35.7133	35.0967	35.1967	34.77	35.0433	34.76	35.68	35.5833	35.0133		36.1867	35.2467	35.6867
4.55	35.65	34.79	35.6667	35.14	35.2267	34.7667	35.0867	34.7133	35.5667	35.5333	35.1133		36.1667	35.23	35.67
4.56667	35.5667	34.7767	35.7367	35.13	35.26	34.8133	35.0033	34.6767	35.5133	35.46	35.2233		36.08	35.22	35.65
4.58333	35.5067	34.7367	35.83	35.0967	35.3233	34.7933	34.9933	34.6467	35.5533	35.3967	35.2967		36.0133	35.23	35.6467
4.6	35.5267	34.7133	35.8467	35.03	35.36	34.7533	35.01	34.6333	35.5667	35.35	35.3667		35.9867	35.27	35.63
4.61667	35.59	34.7133	35.8733	34.9733	35.37	34.7267	35.0167	34.6533	35.5933	35.2933	35.3767		35.9967	35.2367	35.6133
4.63333	35.6067	34.6567	35.9133	34.9267	35.4167	34.69	35.0733	34.69	35.6267	35.2467	35.36		35.96	35.1867	35.5833
4.65	35.58	34.46	35.8833	34.8933	35.4467	34.6467	35.0967	34.72	35.6767	35.1933	35.36		35.89	35.1833	35.5433
4.66667	35.4967	34.3967	35.8733	34.9133	35.4933	34.6433	35.11	34.7433	35.6967	35.14	35.42		35.8133	35.1767	35.5233
4.68333	35.5	34.4	35.92	34.96	35.55	34.63	35.12	34.76	35.71	35.1067	35.4767		35.72	35.18	35.49
4.7	35.5067	34.43	35.93	34.9167	35.5867	34.6033	35.1067	34.76	35.7167	35.13	35.4667		35.64	35.1867	35.4133
4.71667	35.4533	34.4533	35.9033	34.7267	35.6033	34.5767	35.0667	34.7567	35.7067	35.1233	35.4567		35.6433	35.1567	35.38
4.73333	35.3667	34.4967	35.9033	34.66	35.62	34.6	35.17	34.77	35.6933	35.1	35.4633		35.6267	35.1867	35.3567
4.75	35.3367	34.5033	35.9067	34.6933	35.6267	34.59	35.27	34.8633	35.6733	35.08	35.4333		35.5767	35.2433	35.3067
4.76667	35.4867	34.4633	35.91	34.7533	35.6533	34.5833	35.2967	34.9467	35.6433	35.0567	35.39		35.4967	35.3533	35.2733
4.78333	35.51	34.4233	35.9067	34.8167	35.69	34.5667	35.3333	35.02	35.61	35.0333	35.3767		35.4933	35.43	35.2433
4.8	35.4033	34.3733	35.87	34.8233	35.7067	34.5567	35.3067	35.0567	35.5767	35.0133	35.36		35.4833	35.44	35.2067
4.81667	35.3533	34.3233	35.8667	34.82	35.7233	34.57	35.3133	35.0467	35.5533	34.9867	35.3833		35.48	35.4567	35.1767
4.83333	35.3133	34.37	35.93	34.8967	35.7333	34.5733	35.4167	35.07	35.5333	34.9233	35.4167		35.4867	35.5333	35.16
4.85	35.3267	34.3733	35.94	34.9833	35.72	34.5433	35.4833	35.06	35.5167	34.9033	35.4867		35.4733	35.56	35.19
4.86667	35.45	34.3867	35.94	35.02	35.7333	34.5967	35.5167	35.03	35.4933	34.8933	35.5167		35.44	35.58	35.18
4.88333	35.4567	34.4233	35.9567	35.0367	35.7533	34.68	35.5067	34.9933	35.4567	34.8967	35.5167		35.3833	35.6067	35.1667
4.9	35.52	34.3867	35.94	35.03	35.74	34.6633	35.4867	34.94	35.4333	34.9467	35.55		35.32	35.5533	35.1533
4.91667	35.5933	34.3067	35.88	35.0233	35.7033	34.61	35.5767	34.9067	35.4067	34.9333	35.64		35.2333	35.4067	35.1433
4.93333	35.61	34.2567	35.8233	35.0233	35.6833	34.5567	35.6267	34.8933	35.39	34.9067	35.6733		35.1933	35.3067	35.13
4.95	35.6367	34.4533	35.7267	35.0167	35.7067	34.7267	35.6	34.89	35.3767	34.92	35.6767		35.2	35.28	35.1133
4.96667	35.6267	34.6933	35.6533	35	35.7267	34.94	35.56	34.8667	35.3533	35.06	35.66		35.1867	35.3667	35.1067
4.98333	35.58	34.79	35.6233	34.99	35.73	35.09	35.5267	34.82	35.3333	35.1067	35.64		35.14	35.3867	35.0767
5	35.62	34.8933	35.6	34.9533	35.7267	35.1833	35.5	34.7867	35.3167	35.13	35.6567		35.1267	35.3967	35.0633
5.01667	35.6633	34.9367	35.5933	34.9433	35.72	35.24	35.4933	34.7433	35.2967	35.1267	35.6467		35.1333	35.4	35.05
5.03333	35.6567	34.9733	35.5833	34.96	35.7	35.2667	35.4733	34.69	35.2567	35.0967	35.59		35.12	35.37	35.0367
5.05	35.64	35.0367	35.5733	35.0167	35.68	35.3233	35.45	34.65	35.2733	35.09	35.5733		35.1033	35.3167	35.01
5.06667	35.6333	35.0767	35.5767	35.0467	35.6333	35.3667	35.43	34.6433	35.26	35.07	35.6333		35.0933	35.2967	34.98
5.08333	35.6767	35.0067	35.5067	35.0567	35.6	35.29	35.39	34.6433	35.2433	35.0167	35.6067		35.0967	35.2533	34.9567
5.1	35.6967	34.7033	35.4567	34.9667	35.59	34.99	35.4133	34.6133	35.2267	34.9767	35.5633		35.09	35.1733	34.94
5.11667	35.71	34.6367	35.39	34.8133	35.62	34.9133	35.46	34.6	35.2167	34.9533	35.47		35.0833	35.1267	34.9333
5.13333	35.76	34.66	35.3	34.76	35.6033	34.9033	35.4967	34.6133	35.2367	34.9367	35.4133		35.0467	35.1133	34.9167
5.15	35.7333	34.7567	35.2367	34.8633	35.5433	34.9367	35.5333	34.6033	35.28	34.91	35.3633		35.0233	35.09	34.92
5.16667	35.6367	34.8333	35.2233	34.9133	35.5533	34.98	35.4833	34.61	35.27	34.8933	35.3233		34.99	35.1767	34.91
5.18333	35.54	34.8333	35.34	34.8767	35.6033	34.9833	35.41	34.5967	35.2467	34.8967	35.2533		34.97	35.1867	34.8733
5.2	35.5667	34.8633	35.26	34.86	35.6433	35.02	35.2767	34.54	35.2133	34.9033	35.2333		35.0267	35.1567	34.9
5.21667	35.6333	34.8767	35.27	34.8933	35.7	35.03	35.3067	34.5033	35.21	34.9067	35.2767		35.07	35.2167	34.9633
5.23333	35.6467	34.9133	35.3733	34.88	35.7467	35.03	35.41	34.48	35.1933	34.9267	35.27		35.15	35.2533	34.98
5.25	35.6433	34.9667	35.51	34.8933	35.77	35.05	35.5067	34.4767	35.1733	34.99	35.2033		35.1667	35.3267	34.97
5.26667	35.6267	34.9867	35.5833	34.91	35.79	35.0567	35.58	34.4767	35.1667	35.09	35.15		35.1933	35.4267	34.9867
5.28333	35.6067	34.9533	35.5933	34.88	35.8	34.97	35.7	34.46	35.2067	35.1	35.09		35.2367	35.5067	35.0167
5.3	35.5767	34.9633	35.6733	34.8033	35.7933	34.87	35.76	34.4267	35.3233	35.0867	35.0367		35.26	35.5467	35.0233
5.31667	35.5467	35.0533	35.6967	34.73	35.7767	34.87	35.74	34.4	35.3767	35.13	35.0133		35.2467	35.59	35.0567
5.33333	35.52	35.12	35.75	34.6633	35.75	34.9033	35.6867	34.3733	35.3833	35.1733	34.99		35.1833	35.66	35.04
5.35	35.4967	35.1733	35.8433	34.6833	35.7133	34.92	35.63	34.37	35.3867	35.2	34.9567		35.0767	35.7167	34.9667
5.36667	35.4833	35.1933	35.91	34.76	35.6733	34.95	35.58	34.37	35.3233	35.2267	34.9133		35.0333	35.73	34.9333
5.38333	35.4633	35.21	35.9333	34.8733	35.63	34.9433	35.6367	34.3433	35.2367	35.2433	34.87		35.02	35.7333	34.91
5.4	35.4333	35.2233	35.87	34.9567	35.58	34.9233	35.7833	34.3133	35.1967	35.2533	34.8367		34.9933	35.73	34.8833
5.41667	35.4167	35.18	35.8	34.9767	35.5333	34.8867	35.7333	34.3	35.1767	35.25	34.7867		34.96	35.71	34.8833
5.43333	35.3533	35.1467	35.8733	35.01	35.5033	34.8533	35.6467	34.32	35.2567	35.2233	34.7567		34.9367	35.7033	34.88
5.45	35.3267	35.15	35.93	35.0633	35.4667	34.8633	35.5567	34.3467	35.2933	35.1333	34.7667		34.9033	35.64	34.8933
5.46667	35.3167	35.1833	35.9767	35.0967	35.4567	34.86	35.5633	34.3533	35.34	35.1167	34.7867		34.8633	35.5533	34.9267
5.48333	35.2933	35.1933	35.9333	35.04	35.4467	35.0767	35.6433	34.3267	35.37	35.2867	34.7767		34.86	35.4933	34.9533
5.5	35.2767	35.2	35.8367	34.98	35.44	35.1067	35.6667	34.2633	35.3667	35.28	34.7667		34.8567	35.4567	34.9467
5.51667	35.2733	35.1967	35.8133	34.95	35.4267	35.06	35.5333	34.2833	35.3967	35.24	34.7967		34.8333	35.4233	34.9033
5.53333	35.2433	35.1533	35.8	34.9633	35.41	34.9567	35.4533	34.28	35.51	35.3233	34.7767		34.7967	35.4533	34.8767
5.55	35.2	35.09	35.79	35.0467	35.4	34.8567	35.4567	34.3167	35.5167	35.4533	34.75		34.77	35.5233	34.8633
5.56667	35.1633	35.0933	35.8167	35.17	35.3633	34.81	35.48	34.4033	35.5467	35.4967	34.73		34.75	35.52	34.8433
5.58333	35.12	35.0867	35.8967	35.1467	35.3333	34.7467	35.57	34.4267	35.58	35.44	34.7233		34.7233	35.45	34.8033
5.6	35.1267	35.09	35.92	35.1	35.3067	34.7133	35.5767	34.4067	35.5967	35.34	34.75		34.7	35.33	34.76
5.61667	35.1967	35.1133	35.8767	35.0633	35.31	34.68	35.53	34.4067	35.66	35.35	34.7533		34.7	35.3067	34.75
5.63333	35.24	35.1433	35.88	35.05	35.29	34.6733	35.5067	34.42	35.6867	35.2867	34.7467		34.7333	35.2767	34.74
5.65	35.2567	35.1633	35.9733	35.0367	35.2667	34.68	35.58	34.4167	35.6967	35.2967	34.7367		34.8067	35.2667	34.75
5.66667	35.2467	35.1833	36.0333	34.9633	35.2333	34.6767	35.61	34.43	35.6833	35.41	34.72		34.8533	35.2567	34.7533
5.68333	35.2233	35.1833	36.08	34.84	35.1933	34.6567	35.63	34.4433	35.67	35.4567	34.6967		34.9033	35.24	34.7467
5.7	35.2033	35.18	36.1167	34.7467	35.15	34.6367	35.6533	34.47	35.6433	35.4633	34.65		34.96	35.2233	34.7
5.71667	35.1767	35.18	36.1333	34.7	35.1167	34.63	35.6833	34.4467	35.6467	35.5267	34.61		35.0733	35.2633	34.6667
5.73333	35.1633	35.18	36.16	34.72	35.09	34.5967	35.7133	34.46	35.69	35.59	34.5967		35.29	35.3133	34.7133
5.75	35.1467	35.1667	36.1933	34.76	35.05	34.6067	35.7567	34.59	35.71	35.6533	34.63		35.3467	35.3267	34.7433
5.76667	35.17	35.1667	36.1767	34.74	35.0267	34.66	35.81	34.76	35.71	35.6467	34.6133		35.38	35.32	34.7233
5.78333	35.1667	35.18	36.1333	34.68	35.0067	34.7067	35.8	34.79	35.72	35.63	34.6067		35.39	35.3567	34.7167
5.8	35.19	35.1933	36.0833	34.6033	34.9867	34.7567	35.7667	34.7133	35.74	35.69	34.62		35.3933	35.43	34.7233
5.81667	35.2433	35.1733	36.0267	34.5667	35	34.75	35.7333	34.5233	35.7667	35.7267	34.6167		35.37	35.4633	34.71
5.83333	35.22	35.1733	35.9767	34.54	35.0133	34.7033	35.6967	34.3133	35.7633	35.75	34.6233		35.34	35.4333	34.7067
5.85	35.22	35.1667	35.9567	34.5	35.0067	34.6833	35.7067	34.1533	35.75	35.8567	34.7267		35.31	35.41	34.79
5.86667	35.2567	35.13	35.9267	34.5267	35.0167	34.68	35.6667	34.2033	35.75	35.8667	34.7867		35.29	35.4	34.8233
5.88333	35.2833	35.1233	35.8533	34.6467	35.01	34.69	35.6	34.3133	35.7067	35.8167	34.81		35.2733	35.3933	34.8333
5.9	35.27	35.1267	35.7567	34.7833	34.9933	34.7067	35.6	34.3833	35.6233	35.9133	34.84		35.2467	35.45	34.8633
5.91667	35.2733	35.1067	35.8133	34.9	34.9667	34.7067	35.7167	34.53	35.58	35.9767	34.82		35.1967	35.5033	34.8533
5.93333	35.2867	35.0667	35.79	34.92	34.94	34.6933	35.7267	34.5767	35.5833	35.97	34.75		35.12	35.5	34.7867
5.95	35.28	35.0567	35.7833	34.94	34.91	34.6967	35.6667	34.6167	35.57	35.9967	34.7267		35.0733	35.4767	34.7833
5.96667	35.2667	35.0567	35.8467	34.99	34.8867	34.7267	35.5667	34.6667	35.5433	36.0567	34.85		35.0433	35.4467	34.8933
5.98333	35.28	35.0333	35.7367	35.1	34.8667	34.7233	35.48	34.7267	35.5267	36.0633	34.93		35.0433	35.4267	34.9167
6	35.2733	35.0267	35.58	35.1867	34.8633	34.72	35.4433	34.8567	35.5067	36.08	34.9833		35.0467	35.48	34.9

## Sheet: CapIT Cap
Time	Veh-IT-Cap							Veh-IT-Veh							Cap-IT-Cap							Cap-IT-Veh
	4214	4244	4248	4249	4246			4214	4244	4248	4249	4246			4223	4229	42XX	4258	4241	4261	4273	4223	4229	42XX	4258	4241	4261	4273
-1	35.72	36.59	35.72	36.3	35.2			35.97	35.69	35.58	35.75	35.62			36.35	35.89	36.02	35.68	34.89	35.68	34.69	36.7	35.76	35.6	34.71	35.44	35.34	34.97
-0.983333	35.75	36.44	35.74	36.22	35.19			35.94	35.65	35.57	35.77	35.61			36.37	35.93	35.97	35.72	34.85	35.65	34.7	36.65	35.73	35.59	34.68	35.49	35.35	34.93
-0.966667	35.76	36.55	35.74	36.13	35.18			35.93	35.63	35.59	35.72	35.59			36.36	35.94	35.91	35.76	34.81	35.67	34.72	36.61	35.7	35.53	34.67	35.5	35.33	34.89
-0.95	35.74	36.72	35.74	35.99	35.15			35.91	35.59	35.74	35.7	35.54			36.32	35.92	35.92	35.77	34.78	35.68	34.73	36.61	35.69	35.46	34.67	35.52	35.35	34.85
-0.933333	35.65	36.74	35.74	35.9	35.12			36.02	35.55	35.78	35.66	35.46			36.26	35.9	35.93	35.78	34.78	35.68	34.73	36.59	35.7	35.49	34.71	35.48	35.56	34.79
-0.916667	35.64	36.66	35.74	35.83	35.1			36.27	35.51	35.77	35.59	35.4			36.18	35.88	35.93	35.78	34.77	35.66	34.75	36.53	35.75	35.64	34.82	35.36	35.71	34.73
-0.9	35.66	36.59	35.7	35.79	35.07			36.25	35.49	35.76	35.61	35.29			36.12	35.87	35.94	35.78	34.76	35.64	34.77	36.46	35.78	35.66	34.95	35.32	35.81	34.71
-0.883333	35.67	36.55	35.7	35.84	35.05			36.1	35.46	35.72	35.64	35.26			36.04	35.84	35.96	35.79	34.73	35.63	34.77	36.39	35.8	35.64	35.17	35.28	35.89	34.7
-0.866667	35.68	36.52	35.7	35.87	35.04			35.95	35.43	35.61	35.58	35.25			35.94	35.8	35.96	35.84	34.71	35.58	34.75	36.31	35.81	35.58	35.29	35.25	35.91	34.7
-0.85	35.7	36.46	35.71	35.9	35.04			36.32	35.45	35.53	35.65	35.25			35.84	35.77	35.96	35.91	34.69	35.58	34.8	36.26	35.79	35.43	35.36	35.23	35.91	34.81
-0.833333	35.69	36.39	35.72	35.93	35.05			36.59	35.46	35.5	35.81	35.25			35.75	35.76	35.95	36.01	34.68	35.57	34.83	36.23	35.81	35.36	35.38	35.2	35.88	34.88
-0.816667	35.64	36.34	35.73	35.96	35.01			36.78	35.46	35.48	35.95	35.24			35.77	35.71	35.92	36.11	34.66	35.54	34.8	36.21	35.91	35.4	35.34	35.18	35.84	34.94
-0.8	35.63	36.31	35.77	35.99	34.94			36.85	35.46	35.5	36.17	35.25			35.78	35.72	35.88	36.17	34.7	35.5	34.78	36.18	35.95	35.45	35.23	35.17	35.81	35.01
-0.783333	35.62	36.26	35.78	35.99	35.04			36.85	35.46	35.54	36.47	35.26			35.76	35.81	35.9	36.19	34.78	35.48	34.74	36.15	35.98	35.49	35.2	35.15	35.77	35.06
-0.766667	35.6	36.19	35.77	35.96	35.24			36.74	35.46	35.55	36.71	35.29			35.77	35.85	35.95	36.21	34.76	35.43	34.7	36.12	36	35.49	35.18	35.11	35.75	35.08
-0.75	35.6	36.14	35.76	35.93	35.65			36.45	35.45	35.56	36.89	35.34			35.79	35.92	35.99	36.23	34.7	35.4	34.69	36.13	36.02	35.47	35.12	35.06	35.75	35.09
-0.733333	35.6	36.08	35.74	35.91	35.74			36.58	35.42	35.59	36.93	35.37			35.8	36.09	36	36.24	34.63	35.43	34.75	36.13	36.01	35.42	35.07	35.01	35.75	35.09
-0.716667	35.58	36.03	35.72	35.9	35.74			36.71	35.4	35.59	37.02	35.37			35.85	36.19	35.95	36.24	34.65	35.47	34.81	36.13	35.98	35.37	35.04	35	35.73	35.07
-0.7	35.57	35.97	35.69	35.9	35.71			36.71	35.43	35.53	37.2	35.35			35.89	36.19	35.92	36.21	34.63	35.52	34.85	36.12	35.94	35.4	35	35.01	35.73	35.01
-0.683333	35.56	35.94	35.72	35.89	35.66			36.75	35.46	35.46	37.3	35.36			35.89	36.21	35.94	36.17	34.77	35.57	34.87	36.11	35.89	35.46	35.02	35.01	35.78	34.95
-0.666667	35.55	35.99	35.72	35.87	35.62			36.83	35.48	35.42	37.27	35.38			35.88	36.28	36.06	36.11	35.04	35.59	34.87	36.11	35.87	35.5	35.11	35.03	35.85	34.89
-0.65	35.55	36	35.66	35.86	35.6			36.83	35.5	35.36	37.34	35.36			35.84	36.37	36.14	36.03	35.23	35.59	34.86	36.1	35.86	35.53	35.24	35.06	35.9	34.82
-0.633333	35.55	36	35.66	35.83	35.58			36.77	35.53	35.31	37.46	35.31			35.78	36.56	36.15	35.96	35.56	35.58	34.86	36.07	35.86	35.56	35.35	35.09	35.92	34.78
-0.616667	35.55	35.99	35.66	35.8	35.55			36.7	35.53	35.3	37.48	35.3			35.68	36.71	36.1	35.92	35.92	35.59	34.82	36.03	35.83	35.56	35.39	35.12	35.93	34.83
-0.6	35.55	35.96	35.65	35.8	35.41			36.6	35.55	35.31	37.49	35.27			35.65	36.83	36.04	35.88	35.92	35.63	34.65	35.97	35.74	35.54	35.41	35.16	35.92	34.87
-0.583333	35.58	35.94	35.6	35.79	35.34			36.5	35.57	35.32	37.48	35.23			35.67	36.86	36.04	35.82	35.98	35.66	34.61	35.98	35.73	35.5	35.42	35.19	35.9	34.88
-0.566667	35.59	35.95	35.52	35.78	35.33			36.44	35.59	35.31	37.41	35.19			35.75	36.86	36.07	35.77	36.45	35.65	34.64	35.96	35.74	35.47	35.4	35.22	35.92	34.86
-0.55	35.59	35.96	35.58	35.77	35.44			36.38	35.6	35.3	37.35	35.15			35.8	36.88	36.05	35.71	36.56	35.64	34.65	35.93	35.77	35.48	35.38	35.37	36.02	34.81
-0.533333	35.71	35.96	35.67	35.76	35.48			36.32	35.6	35.3	37.29	35.15			35.83	36.84	35.99	35.64	36.6	35.65	34.63	35.9	35.84	35.52	35.35	35.45	36.12	34.78
-0.516667	35.82	35.93	35.72	35.75	35.48			36.26	35.61	35.3	37.28	35.15			35.83	36.78	35.87	35.56	36.65	35.66	34.55	35.85	35.9	35.53	35.34	35.48	36.21	34.77
-0.5	36.07	35.91	35.77	35.75	35.47			36.26	35.58	35.27	37.26	35.15			35.83	36.7	35.75	35.47	36.67	35.64	34.53	35.81	35.94	35.53	35.29	35.74	36.38	34.81
-0.483333	36.25	35.91	35.82	35.76	35.46			36.26	35.57	35.24	37.27	35.15			35.79	36.66	35.66	35.41	36.64	35.65	34.53	35.8	35.98	35.52	35.23	35.97	36.44	34.91
-0.466667	36.33	35.92	35.8	35.75	35.52			36.26	35.56	35.2	37.27	35.15			35.77	36.65	35.6	35.39	36.59	35.73	34.55	35.75	36.11	35.54	35.17	36.06	36.45	35.01
-0.45	36.31	35.94	35.73	35.73	35.55			36.25	35.53	35.17	37.26	35.19			35.78	36.67	35.53	35.32	36.53	35.85	34.54	35.75	36.16	35.54	35.1	36.36	36.45	35.09
-0.433333	36.03	35.94	35.63	35.7	35.55			36.23	35.5	35.16	37.27	35.31			35.79	36.56	35.44	34.93	36.47	35.88	34.52	35.78	36.15	35.58	35.04	36.54	36.44	35.11
-0.416667	35.77	35.97	35.59	35.71	35.54			36.22	35.48	35.19	37.32	35.43			35.79	36.56	35.38	34.68	36.43	35.88	34.48	35.79	36.1	35.61	34.97	36.68	36.41	35.11
-0.4	35.73	36.01	35.6	35.77	35.52			36.21	35.47	35.34	37.47	35.62			35.77	36.6	35.36	34.59	36.38	35.85	34.43	35.75	36.06	35.62	34.95	36.84	36.34	35.09
-0.383333	35.76	36.03	35.59	35.8	35.48			36.19	35.45	35.43	37.5	35.65			35.75	36.62	35.38	34.54	36.31	35.79	34.37	35.68	35.99	35.62	34.93	37.27	36.27	35.08
-0.366667	36.04	36.07	35.57	35.81	35.34			36.18	35.44	35.48	37.4	35.57			35.73	36.64	35.43	34.49	36.21	35.73	34.27	35.63	35.92	35.66	34.88	37.59	36.2	35.03
-0.35	36.09	36.1	35.5	35.81	35.34			36.18	35.45	35.51	37.34	35.63			35.74	36.67	35.49	34.43	36.14	35.69	34.28	35.59	35.84	35.7	34.85	37.76	36.12	34.97
-0.333333	36.07	36.13	35.37	35.8	35.38			36.17	35.5	35.51	37.34	35.79			35.74	36.69	35.54	34.38	36.08	35.67	34.3	35.56	35.78	35.73	34.84	37.89	36.04	34.92
-0.316667	36.03	36.14	35.28	35.77	35.39			36.15	35.52	35.5	37.36	35.82			35.79	36.68	35.61	34.33	36.03	35.62	34.32	35.51	35.73	35.73	34.84	37.91	35.95	34.86
-0.3	35.98	36.11	35.44	35.73	35.43			36.17	35.54	35.48	37.4	35.82			35.86	36.66	35.69	34.29	35.98	35.58	34.35	35.46	35.7	35.62	34.84	37.93	35.87	34.81
-0.283333	36	36	35.57	35.7	35.44			36.21	35.55	35.45	37.5	35.84			36.09	36.69	35.74	34.26	35.92	35.53	34.38	35.39	35.76	35.6	34.83	37.89	35.81	34.82
-0.266667	35.99	35.95	35.64	35.68	35.45			36.24	35.55	35.42	37.5	35.83			36.47	36.72	35.75	34.22	35.86	35.45	34.4	35.32	35.84	35.56	34.82	37.77	35.78	34.83
-0.25	35.94	35.95	35.6	35.66	35.48			36.27	35.52	35.39	37.32	35.77			36.62	36.8	35.76	34.17	35.8	35.39	34.4	35.25	35.92	35.52	34.83	37.57	35.73	34.84
-0.233333	35.96	35.95	35.44	35.65	35.48			36.37	35.46	35.34	37.17	35.74			36.88	36.81	35.76	34.14	35.75	35.36	34.39	35.19	36.11	35.53	34.84	37.41	35.66	34.85
-0.216667	36.02	35.93	35.59	35.63	35.46			36.42	35.52	35.3	37.14	35.72			37.14	36.8	35.75	34.12	35.68	35.36	34.38	35.12	36.23	35.54	34.87	37.28	35.59	34.84
-0.2	36.06	35.94	36.05	35.62	35.45			36.43	35.62	35.32	37.16	35.67			37.37	36.79	35.75	34.11	35.62	35.38	34.38	35.03	36.28	35.54	34.95	37.17	35.54	34.83
-0.183333	36.07	35.97	36.3	35.63	35.45			36.43	35.63	35.31	37.1	35.63			37.59	36.77	35.75	34.11	35.58	35.39	34.37	35.01	36.31	35.55	34.98	37.14	35.56	34.81
-0.166667	36.06	35.98	36.5	35.63	35.45			36.42	35.7	35.28	36.95	35.58			37.68	36.73	35.75	34.1	35.55	35.4	34.33	35.09	36.46	35.55	35.03	37.11	35.59	34.88
-0.15	36.03	35.93	36.73	35.65	35.44			36.41	35.85	35.28	36.8	35.59			37.74	36.76	35.76	34.09	35.53	35.42	34.29	35.23	36.61	35.56	35.07	37.13	35.59	35.06
-0.133333	36	35.73	36.77	35.75	35.42			36.38	35.88	35.29	36.79	35.6			37.83	36.82	35.76	34.09	35.5	35.44	34.27	35.39	36.63	35.58	35.1	37.31	35.61	35.19
-0.116667	35.98	35.68	36.65	35.9	35.41			36.37	35.86	35.28	36.76	35.59			37.85	36.85	35.74	34.12	35.55	35.45	34.29	35.58	36.55	35.86	35.13	37.38	35.7	35.5
-0.1	35.97	35.72	36.6	35.97	35.4			36.37	35.83	35.27	36.67	35.59			37.83	36.85	35.67	34.16	35.63	35.47	34.29	35.85	36.42	36.01	35.14	37.42	35.79	35.77
-0.0833333	36	35.75	36.69	36.03	35.4			36.35	35.79	35.22	36.58	35.53			37.83	36.85	35.74	34.18	35.69	35.47	34.25	36.03	36.59	36.16	35.12	37.46	35.85	35.92
-0.0666667	36	35.75	36.73	36.03	35.4			36.33	35.72	35.17	36.51	35.47			37.86	36.84	35.84	34.21	35.7	35.46	34.22	36.13	36.7	36.33	35.08	37.44	35.87	36.02
-0.05	35.98	35.75	36.72	36.01	35.4			36.32	35.69	35.24	36.44	35.41			37.82	36.82	35.87	34.35	35.68	35.47	34.3	36.13	37.04	36.56	35.03	37.38	35.88	36.2
-0.0333333	35.98	35.73	36.66	36.11	35.38			36.29	35.69	35.46	36.35	35.36			37.73	36.78	35.89	34.57	35.64	35.5	34.37	35.99	37.28	36.67	34.95	37.31	35.89	36.46
-0.0166667	35.98	35.74	36.63	36.32	35.33			36.26	35.67	35.5	36.32	35.31			37.69	36.75	35.92	34.68	35.59	35.51	34.4	36.14	37.4	36.72	34.91	37.34	35.89	36.76
0	35.97	35.71	36.58	36.56	35.24			36.25	35.63	35.49	36.3	35.26			37.55	36.7	35.95	34.75	35.56	35.5	34.46	36.22	37.43	36.75	34.86	37.37	35.87	36.89
0.0166667	35.95	35.65	36.55	36.67	35.04			36.23	35.53	35.78	36.32	35.21			37.46	36.65	35.95	34.77	35.51	35.46	34.49	36.1	37.29	36.89	34.82	37.37	35.85	37.15
0.0333333	35.93	35.62	36.55	36.82	34.8			36.25	35.51	36	36.44	35.22			37.45	36.65	35.81	34.8	35.49	35.24	34.51	35.96	37.18	37.04	34.76	37.36	35.81	37.15
0.05	35.96	35.64	36.68	36.89	34.66			36.35	35.52	36.3	36.5	35.26			37.41	36.66	35.73	34.95	35.47	35.13	34.59	35.87	37.09	37.17	34.79	37.3	35.83	37.14
0.0666667	36.09	35.2	36.67	36.89	34.65			36.53	34.69	36.44	36.5	35.3			35.95	36.64	35.68	35.5	35.5	35.18	34.72	35.53	37.05	37.32	34.87	37.26	35.98	37.36
0.0833333	36.12	34.92	35.77	36.86	34.69			36.72	34.61	35.85	36.43	35.37			35.29	36.64	35.56	35.56	35.62	35.32	34.92	35.23	36.93	36.87	34.94	37.19	36.18	37.51
0.1	36.11	34.62	35.61	36.49	34.81			36.83	34.44	35.67	32.96	35.36			34.77	35.75	35.55	35.11	35.73	35.55	35.12	35.16		36.48	34.65	37.09	36.38	37.74
0.116667	36.2	34.28	35.27	34.78	34.81			36.85	34.31	35.65	33.58	35.32			34.51	35.8	36.01	34.5	35.08	35.77	35.2	35.1	35.93	36.43	34.35	34.5	36.53	37.79
0.133333	36.41	33.86	34.57	36.69	34.75			36.8	34.25	35.65	35.5	34.87			34.41	35.98	35.89	34.88	31.99	36.01	35.31	35.04	36.04	36.42	34.17	32.36	36.61	37.65
0.15	36.55	33.35	33.75	36.4	35.18			36.78	34.23	35.44	35.68	34.6			34.25	36.17	35.82	34.85	35.19	36.02	35.38	34.93	36.05	36.34	33.96	35.64	36.69	37.46
0.166667	36.64	32.86	33.46	35.72	35.05			35.7	34.26	35.26	35.84	34.23			33.97	36.38	35.69	34.89	35.37	35.87	35.34	34.69	35.91	36.32	33.85	35.87	35.67	37.37
0.183333		32.62	33.32	35.03	34.97			35.51	34.27	35.31	35.93	33.96			33.95	36.56	35.44	34.87	35.54	35.72	35.01	34.44	35.88	36.37	33.73	35.92	35.56	36.33
0.2	36.37	32.42	33.26	34.51	34.94			35.1	34.42	35.45	36.08	33.84			33.94	36.68	35.17	34.82	35.51	35.67	34.82	34.54	35.94	36.43	33.47	35.96	35.53	36.18
0.216667	36.23	32.21	33.27	34.12	34.8			35.17	34.48	35.61	36.16	33.75			33.85	36.76	35.06	35.03	35.53	35.68	34.71	34.53	36.01	36.48	33.49	35.94	35.61	36.07
0.233333	35.97	32.06	33.21	33.97	34.66			35.1	34.79	35.68	36.27	33.62			33.66	36.81	34.96	35.35	35.86	35.53	34.61	34.59	36.11	36.74	33.62	36.13	35.85	35.96
0.25	35.64	31.95	32.85	34	34.53			34.67	34.78	35.45	36.48	33.59			33.6	36.82	34.84	35.56	36.05	35.36	34.48	34.61	36.16	36.8	33.81	36.29	36	36.02
0.266667	35.19	31.67	32.48	33.95	34.54			34.78	34.97	35.29	36.73	33.73			33.59	36.72	34.79	36.02	36.17	35.56	34.42	34.54	36.2	36.81	34.13	36.27	36.2	36.07
0.283333	34.78	31.24	31.99	33.82	34.47			34.86	35.12	35.38	36.87	33.81			33.53	36.67	34.71	36.17	36.29	35.86	34.33	34.61	36.16	36.87	34.35	36.25	36.49	36.08
0.3	34.49	30.95	31.96	33.48	34.32			34.96	35.33	35.49	36.93	33.84			33.47	36.55	34.59	36.28	36.36	35.88	34.44	34.69	36.15	36.98	34.6	36.24	36.75	36.29
0.316667	34.26	30.8	32.02	32.95	34.23			34.94	35.52	35.56	37.06	33.83			33.41	36.45	34.5	36.37	36.33	35.7	34.87	34.78	36.28	37.16	34.84	36.18	37.07	36.63
0.333333	34.04	30.76	31.86	32.63	34.07			34.97	35.77	35.66	37.35	33.83			33.34	36.41	34.76	36.38	36.21	35.77	35.14	35.21	36.36	37.4	34.73	36.21	37.5	36.87
0.35	33.76	30.68	31.66	32.32	33.86			35.19	36	35.8	37.41	33.87			33.25	36.43	34.83	36.29	36.29	36.01	35.42	35.37	36.36	37.62	34.51	36.29	37.8	37.11
0.366667	33.49	30.59	31.58	31.87	33.81			35.17	36.27	35.81	37.48	33.96			33.16	36.38	34.7	36.05	36.46	36.08	35.62	35.32	36.44	37.91	35.22	36.45	37.91	37.27
0.383333	33.29	30.49	31.53	31.49	33.78			35.1	36.45	35.95	37.58	34.03			33.07	36.21	34.64	35.87	36.49	36.04	35.77	35.21	36.53	38.26	35.35	36.43	38.04	37.38
0.4	33.11	30.39	31.44	31.31	33.66			35.15	36.55	36.29	37.72	34.03			32.92	36.13	34.76	35.7	36.43	35.95	35.96	35.2	36.52	38.4	35.5	36.45	38.19	37.38
0.416667	32.92	30.21	31.37	31.13	33.52			35.09	36.59	36.37	37.74	34.06			32.81	36.15	34.71	35.53	36.33	36.07	36.18	35.44	36.51	38.39	35.9	36.55	38.36	37.46
0.433333	32.72	29.83	31.3	30.92	33.48			34.98	36.71	36.14	37.71	34.17			32.74	36.14	34.74	35.33	36.28	36.27	36.3	35.63	36.46	38.27	36.09	36.56	38.49	37.59
0.45	32.53	29.4	31.2	30.77	33.33			34.97	36.85	35.97	37.78	34.25			32.67	36.08	34.73	35.17	36.49	36.34	36.3	35.81	36.33	38.19	36.24	36.51	38.61	37.59
0.466667	32.35	29.14	31.12	30.63	33.29			35.18	36.86	36	37.77	34.26			32.63	35.97	34.37	35.12	36.59	36.42	35.98	35.75	36.31	38.18	36.4	36.45	38.68	37.53
0.483333	32.16	28.97	31.1	30.51	33.26			35.39	36.91	36.22	37.63	34.25			32.6	35.88	34.24	35.14	36.66	36.39	36.03	35.31	36.32	38.16	36.52	36.39	38.67	37.52
0.5	31.99	28.85	31.05	30.49	33.09			35.56	36.98	36.26	37.63	34.29			32.57	35.81	34.35	35.15	36.63	36.42	36.19	35.19	36.42	38.12	36.56	36.34	38.67	37.61
0.516667	31.82	28.73	31.01	30.48	32.75			35.63	37.03	36.3	37.67	34.46			32.54	35.75	34.41	35.16	36.59	36.55	36.62	35.17	36.61	38.1	36.48	36.28	38.68	37.71
0.533333	31.67	28.62	30.98	30.47	32.44			35.63	37.04	36.3	37.7	34.66			32.52	35.67	34.44	35.17	36.74	36.7	36.63	35.26	36.65	38.02	36.2	36.23	38.66	37.71
0.55	31.53	28.5	30.97	30.51	32.05			35.5	36.98	36.24	37.76	34.73			32.51	35.54	34.48	35.15	36.83	36.79	36.58	35.37	36.68	37.99	36.04	36.17	38.72	37.76
0.566667	31.42	28.4	30.97	30.56	31.72			35.23	37.02	36.13	37.59	34.73			32.51	35.47	34.45	35.15	36.79	36.84	36.61	35.51	36.61	37.97	36.37	36.16	38.72	37.79
0.583333	31.33	28.34	30.98	30.58	31.48			35.23	36.91	35.66	37.52	34.77			32.51	35.45	34.53	35.18	36.75	36.82	36.67	35.62	36.4	37.99	36.44	36.16	38.62	37.64
0.6	31.25	28.28	31.01	30.64	31.25			35.55	36.6	35.65	37.64	34.82			32.51	35.45	34.58	35.25	36.74	36.73	36.79	35.69	36.34	38.08	36.41	36.1	38.57	37.55
0.616667	31.16	28.23	31.04	30.73	30.99			35.75	36.62	35.62	37.64	34.87			32.5	35.48	34.54	35.23	36.69	36.56	36.86	35.73	36.27	38.12	35.77	36	38.51	37.5
0.633333	31.07	28.18	31.07	30.76	30.88			35.88	36.66	35.51	37.69	35.02			32.47	35.45	34.48	35.2	36.67	36.52	36.91	35.75	36.26	38.18	35.48	36.32	38.21	37.38
0.65	30.99	28.07	31.1	30.75	30.82			35.97	36.74	35.31	37.71	35.12			32.42	35.32	34.49	35.18	36.57	36.53	36.98	35.75	36.26	38.18	35.67	36.49	37.85	37.33
0.666667	30.93	27.96	31.14	30.69	30.69			35.94	36.77	35.71	37.76	35.25			32.39	35.2	34.72	35.2	36.51	36.53	36.95	35.75	36.28	38.08	36.15	36.5	37.67	37.25
0.683333	30.88	27.91	31.16	30.62	30.67			35.77	36.74	36.07	37.75	35.36			32.37	35.12	34.94	35.26	36.59	36.46	36.82	35.74	36.27	38.07	36.22	36.47	37.52	37.26
0.7	30.85	27.89	31.19	30.67	30.71			35.73	36.7	36.13	37.63	35.39			32.36	35.05	35.06	35.4	36.56	36.39	36.76	35.71	36.2	38.08	36.33	36.4	37.42	37.29
0.716667	30.83	27.9	31.18	30.8	30.75			35.57	36.75	36.09	37.68	35.46			32.33	35	35.23	35.5	36.5	36.37	36.63	35.68	36.19	38	36.41	36.33	37.39	37.25
0.733333	30.81	27.93	31.13	30.84	30.8			35.54	36.9	35.98	37.78	35.44			32.31	34.97	35.12	35.58	36.48	36.6	36.64	35.65	36.22	37.9	36.42	36.24	37.31	37.12
0.75	30.8	27.97	30.99	30.85	30.83			35.52	36.86	35.9	37.79	35.33			32.29	34.93	34.97	35.65	36.54	36.76	36.72	35.62	36.21	37.79	36.45	36.14	37.15	37.03
0.766667	30.82	28.03	30.89	30.88	30.88			35.49	36.79	36.02	37.69	35.29			32.29	34.92	34.89	35.79	36.55	36.73	36.74	35.59	36.23	37.69	36.46	36.06	37.01	37.02
0.783333	30.85	28.05	30.89	30.91	31.03			35.51	36.81	35.96	37.5	35.32			32.3	34.93	34.83	35.85	36.54	36.63	36.66	35.57	36.3	37.59	36.5	35.84	36.98	36.98
0.8	30.86	28.04	30.99	30.92	31.17			35.83	36.61	35.73	37.34	35.35			32.31	34.96	34.79	35.87	36.55	36.61	36.56	35.55	36.37	37.45	36.71	35.78	37.05	36.82
0.816667	30.84	28.06	31.19	30.97	31.27			35.99	36.44	35.98	37.28	35.36			32.32	34.97	34.67	35.87	36.61	36.42	36.49	35.55	36.36	37.34	36.77	35.79	37.05	36.77
0.833333	30.85	28.14	31.42	31.02	31.27			36.03	36.49	36.17	37.5	35.38			32.32	34.98	34.6	35.86	36.61	36.39	36.45	35.56	36.38	37.26	36.75	35.72	37.02	36.71
0.85	30.95	28.25	31.62	31.03	31.14			35.96	36.59	36.19	37.62	35.41			32.3	34.99	34.7	35.85	36.53	36.3	36.44	35.56	36.39	37.15	36.71	35.5	36.94	36.68
0.866667	31.06	28.3	31.8	31.05	31.1			35.99	36.67	36.02	37.68	35.5			32.08	35	34.7	35.99	36.5	36.2	36.45	35.55	36.38	37.09	36.65	35.4	36.88	36.63
0.883333	31.11	28.35	31.94	31.11	31.17			36.08	36.69	36.09	37.68	35.54			31.77	35.08	34.7	35.99	36.5	36.26	36.55	35.53	36.35	37.01	36.66	35.31	36.82	36.61
0.9	31.16	28.47	32.05	31.11	31.34			36.1	36.72	36.22	37.42	35.54			31.82	35.11	34.75	36	36.48	36.47	36.62	35.52	36.35	36.96	36.7	35.43	36.75	36.64
0.916667	31.24	28.5	32.12	31.11	31.65			36.19	36.68	36.02	37.13	35.53			32	35.13	34.76	36.01	36.43	36.58	36.6	35.49	36.35	36.97	36.63	35.55	36.67	36.6
0.933333	31.31	28.53	32.27	31.15	31.84			36.18	36.62	35.46	37	35.62			32.01	35.25	34.76	36.02	36.36	36.62	36.57	35.46	36.35	36.97	36.44	35.6	36.63	36.47
0.95	31.37	28.59	32.41	31.18	31.95			36.21	36.71	35.57	36.99	35.62			31.95	35.39	34.75	36.11	36.3	36.46	36.48	35.43	36.33	36.9	36.17	35.62	36.56	36.36
0.966667	31.4	28.68	32.5	31.19	32.07			36.25	36.72	35.67	37.09	35.54			31.86	35.45	34.63	36.18	36.22	36.19	36.48	35.39	36.28	36.78	36.01	35.6	36.48	36.25
0.983333	31.43	28.74	32.57	31.25	32.39			36.19	36.65	35.62	37.16	35.56			31.77	35.53	34.46	36.23	36.15	36	36.45	35.55	36.21	36.67	36.07	35.57	36.42	36.16
1	31.48	28.8	32.63	31.33	32.57			35.88	36.67	35.19	37.1	35.68			31.71	35.57	34.35	36.29	36.07	35.98	36.48	35.64	36.27	36.59	36.08	35.54	36.34	36.06
1.01667	31.58	28.87	32.71	31.39	32.68			35.75	36.73	34.86	37.01	35.78			31.69	35.55	34.37	36.32	36.04	36.12	36.56	35.75	36.31	36.52	36.04	35.53	36.26	35.97
1.03333	31.67	28.95	32.74	31.48	32.7			35.78	36.67	34.66	37.02	35.85			31.69	35.6	34.4	36.31	36	36.09	36.6	35.79	36.31	36.46	35.94	35.62	36.24	35.9
1.05	31.72	29.04	32.71	31.55	32.72			35.9	36.61	34.6	37.04	35.81			31.73	35.71	34.32	36.22	35.94	36.11	36.7	35.86	36.24	36.42	35.92	35.66	36.26	35.84
1.06667	31.74	29.14	32.68	31.58	32.87			36.05	36.48	34.73	37	35.86			31.77	35.68	34.24	36.23	35.89	36.22	36.69	35.88	36.23	36.4	35.92	35.59	36.29	35.82
1.08333	31.79	29.22	32.84	31.64	32.95			36.08	36.46	34.86	36.95	35.95			31.81	35.64	34.27	36.22	35.86	36.21	36.51	35.85	36.31	36.41	35.89	35.35	36.43	35.84
1.1	31.85	29.27	33.06	31.71	33.01			36.1	36.51	35.03	37.04	35.97			31.84	35.62	34.29	36.18	35.82	36.15	36.52	35.84	36.31	36.41	35.84	35.1	36.49	35.83
1.11667	31.94	29.28	33.2	31.77	33.04			36.13	36.69	35.15	37.01	35.9			31.88	35.59	34.26	36.14	36.01	36.04	36.54	35.83	36.23	36.38	35.83	35.09	36.47	35.8
1.13333	31.99	29.27	33.3	31.85	33.12			36.13	36.74	35.23	36.7	35.75			31.91	35.56	34.33	36.27	36.19	35.96	36.53	35.8	36.19	36.38	35.83	35.14	36.41	35.76
1.15	32.04	29.47	33.38	31.96	33.24			36.09	36.7	35.4	36.58	35.75			31.92	35.55	34.35	36.35	36.33	35.97	36.64	35.81	36.14	36.44	35.89	35.17	36.35	35.73
1.16667	32.09	29.61	33.45	31.98	33.23			36.03	36.63	35.97	36.46	35.94			31.95	35.57	34.29	36.37	36.32	35.97	36.88	35.86	36.11	36.53	35.99	35.22	36.29	35.7
1.18333	32.09	29.71	33.54	31.97	33.23			35.96	36.54	36.1	36.42	36.13			32.01	35.63	34.46	36.32	36.31	35.97	36.88	35.87	36.05	36.53	36.02	35.32	36.25	35.68
1.2	32.03	29.71	33.59	32.05	33.45			35.87	36.55	36.15	36.65	36.32			32.06	35.64	34.64	36.29	36.41	35.97	36.9	35.84	36	36.51	36.01	35.42	36.18	35.68
1.21667	31.91	29.65	33.61	32.13	33.63			35.87	36.57	36.18	36.67	36.52			32.1	35.66	34.75	36.28	36.39	35.94	36.94	35.79	35.95	36.51	35.95	35.45	36.11	35.66
1.23333	31.7	29.64	33.64	32.17	33.77			35.88	36.62	36.18	36.64	36.55			32.16	35.71	34.81	36.27	36.22	35.84	36.9	35.75	35.91	36.51	35.88	35.23	36.03	35.64
1.25	31.54	29.73	33.72	32.23	33.84			35.88	36.67	36.18	36.51	36.53			32.22	35.75	34.64	36.27	36.05	35.75	36.81	35.73	35.88	36.51	35.78	35.27	35.95	35.65
1.26667	31.45	29.81	33.79	32.27	33.84			35.85	36.67	36.18	36.53	36.38			32.3	35.79	34.8	36.29	35.95	35.67	36.89	35.71	35.86	36.5	35.67	35.43	35.87	35.65
1.28333	31.41	29.91	33.78	32.31	33.73			35.81	36.71	36.16	36.61	36.28			32.37	35.84	34.91	36.39	35.94	35.55	36.91	35.66	35.85	36.48	35.57	35.49	35.77	35.65
1.3	31.41	30.07	33.72	32.46	33.63			35.76	36.75	36.14	36.34	36.25			32.45	35.86	34.9	36.6	35.97	35.43	36.82	35.57	35.84	36.42	35.48	35.49	35.7	35.64
1.31667	31.45	30.22	33.72	32.76	33.81			35.73	36.73	36.18	36.3	36.18			32.55	35.86	34.9	36.78	35.97	35.42	36.67	35.26	35.83	36.35	35.39	35.47	35.63	35.62
1.33333	31.51	30.34	33.84	32.92	33.89			35.71	36.68	36.19	36.31	36.17			32.66	35.87	34.99	36.79	35.98	35.56	36.59	35.06	35.83	36.29	35.31	35.44	35.57	35.63
1.35	31.59	30.44	33.9	32.97	33.89			35.69	36.63	36.18	36.4	36.32			32.78	35.89	35.15	36.75	36	35.79	36.48	34.99	35.81	36.29	35.22	35.43	35.54	35.66
1.36667	31.7	30.53	33.88	33.07	33.98			35.67	36.62	36.16	36.48	36.35			32.87	35.9	35.25	36.72	36.01	36.03	36.42	34.95	35.8	36.28	35.12	35.39	35.52	35.68
1.38333	31.83	30.66	33.9	33.13	34.14			35.66	36.63	36.24	36.59	36.34			32.93	35.91	35.28	36.59	36.02	36.1	36.42	34.92	35.84	36.29	35.1	35.35	35.5	35.73
1.4	31.94	30.81	34.03	33.17	34.17			35.69	36.62	36.44	36.64	36.31			33	35.89	35.25	36.43	36.02	36.09	36.51	34.95	35.89	36.31	35.13	35.33	35.49	35.77
1.41667	32.11	30.89	34.26	33.35	34.09			35.69	36.58	36.48	36.41	36.26			33.02	35.88	35.27	36.49	36.04	36.11	36.64	35.07	35.9	36.4	35.19	35.26	35.47	35.79
1.43333	32.18	30.94	34.4	33.45	34.1			35.67	36.52	36.45	36.39	36.21			32.73	35.87	35.28	36.48	36.04	36.12	36.83	35.13	35.9	36.46	35.24	35.18	35.44	35.81
1.45	32.34	31.08	34.46	33.51	34.27			35.64	36.53	36.38	36.47	36.17			32.04	35.85	35.24	36.37	35.99	36.02	36.84	35.12	35.91	36.46	35.28	35.11	35.41	35.83
1.46667	32.64	31.21	34.51	33.59	34.35			35.61	36.54	36.32	36.48	36.13			31.78	35.87	35.29	36.42	35.93	35.91	36.84	35.06	35.91	36.44	35.32	35.05	35.38	35.82
1.48333	32.8	31.33	34.56	33.73	34.4			35.6	36.54	36.25	36.38	36.08			31.64	35.9	35.25	36.5	35.88	35.77	36.87	35.05	35.9	36.48	35.32	34.98	35.35	35.8
1.5	32.88	31.46	34.6	33.77	34.49			35.6	36.51	36.17	36.51	36.11			31.53	35.91	34.9	36.58	35.81	35.72	36.83	35.03	35.89	36.49	35.32	35	35.33	35.77
1.51667	32.85	31.57	34.62	33.8	34.66			35.6	36.49	36.09	36.69	36.16			31.44	35.94	34.78	36.61	35.77	35.68	36.79	35.04	35.86	36.49	35.28	35.08	35.31	35.75
1.53333	32.77	31.62	34.63	33.87	34.73			35.59	36.45	35.92	36.75	36.16			31.34	35.97	34.79	36.6	35.72	35.64	36.76	35.09	35.84	36.48	35.22	35.13	35.39	35.79
1.55	32.73	31.67	34.65	34.06	34.77			35.58	36.36	35.93	36.76	36.15			31.27	35.99	34.87	36.59	35.68	35.6	36.56	35.17	35.83	36.43	35.19	35.17	35.52	35.88
1.56667	32.64	31.72	34.71	34.19	34.78			35.57	36.27	35.94	36.74	36.22			31.23	36.01	34.86	36.52	35.67	35.7	36.67	35.26	35.86	36.4	35.19	35.24	35.53	35.96
1.58333	32.58	31.78	34.69	34.28	34.74			35.57	36.18	35.92	36.68	36.3			31.36	36.02	34.76	36.41	35.63	35.82	36.68	35.32	35.91	36.39	35.19	35.4	35.55	36
1.6	32.53	31.89	34.46	34.29	34.82			35.57	36.11	35.92	36.61	36.3			31.48	36.03	34.71	36.34	35.59	35.9	36.59	35.36	35.9	36.37	35.17	35.55	35.58	36.01
1.61667	32.52	32.28	34.21	34.3	35.05			35.55	36.06	35.86	36.55	36.26			31.56	36.04	34.65	36.27	35.58	35.94	36.61	35.41	35.88	36.36	35.22	35.64	35.62	35.98
1.63333	32.52	32.49	34.21	34.32	35.17			35.52	36.02	35.73	36.5	36.16			31.64	36.04	34.56	36.29	35.58	35.92	36.67	35.43	35.88	36.38	35.26	35.68	35.7	35.9
1.65	32.54	32.53	34.37	34.34	35.32			35.49	35.99	35.82	36.45	36.17			31.69	36.03	34.52	36.39	35.58	35.87	36.65	35.43	35.88	36.38	35.27	35.68	35.77	35.81
1.66667	32.59	32.41	34.57	34.6	35.51			35.45	35.96	36.11	36.41	36.32			31.75	36.07	34.52	36.47	35.57	35.77	36.68	35.43	35.88	36.38	35.26	35.67	35.82	35.81
1.68333	32.67	32.3	34.72	34.76	35.57			35.42	35.97	36.11	36.38	36.35			31.82	36.03	34.53	36.46	35.54	35.69	36.79	35.44	35.88	36.4	35.22	35.64	35.85	35.84
1.7	32.77	32.41	34.83	34.75	35.57			35.4	36.01	35.95	36.28	36.35			31.9	36.02	34.6	36.38	35.5	35.63	36.82	35.44	35.88	36.41	35.18	35.61	35.87	35.85
1.71667	32.86	32.55	34.89	34.81	35.46			35.37	36	35.87	36.09	36.3			31.98	36.12	34.6	36.32	35.51	35.73	36.78	35.45	35.87	36.4	35.13	35.57	35.87	35.82
1.73333	32.93	32.73	34.9	34.84	35.26			35.35	35.94	35.88	35.98	36.24			32.06	36.13	34.56	36.31	35.51	35.82	36.66	35.49	35.84	36.39	35.09	35.52	35.85	35.75
1.75	33.02	32.9	34.91	34.89	35.12			35.39	36.07	35.91	36.02	36.18			32.13	36.26	34.55	36.36	35.5	35.88	36.57	35.54	35.81	36.37	35.07	35.5	35.82	35.68
1.76667	33.11	33.05	34.94	34.93	34.81			35.4	36.1	35.92	36.4	36.13			32.22	36.3	34.59	36.39	35.47	35.89	36.27	35.53	35.78	36.35	35.05	35.55	35.77	35.62
1.78333	33.18	33.18	34.96	35.05	34.82			35.4	36.14	35.92	36.48	36.09			32.36	36.28	34.59	36.39	35.44	35.87	36.27	35.52	35.76	36.35	35.05	35.61	35.74	35.57
1.8	33.26	33.3	34.97	35.21	34.84			35.4	36.21	35.92	36.62	36.08			32.49	36.2	34.59	36.37	35.4	35.78	36.51	35.52	35.73	36.35	35.18	35.66	35.74	35.52
1.81667	33.33	33.33	34.99	35.32	34.79			35.4	36.19	35.91	36.74	36.06			32.62	36.12	34.64	36.36	35.36	35.67	36.54	35.53	35.69	36.34	35.3	35.68	35.72	35.53
1.83333	33.41	33.42	35	35.37	34.79			35.41	36.01	35.9	36.55	36.04			32.73	36.09	34.67	36.36	35.33	35.66	36.55	35.54	35.69	36.3	35.4	35.67	35.7	35.63
1.85	33.51	33.52	34.98	35.47	34.91			35.41	35.99	35.92	36.46	36.01			32.83	36.06	34.68	36.37	35.32	35.63	36.63	35.55	35.71	36.23	35.68	35.64	35.65	35.74
1.86667	33.57	33.61	34.88	35.48	34.99			35.42	36.13	35.99	36.45	35.98			32.94	36	34.69	36.4	35.32	35.54	36.65	35.57	35.72	36.17	35.83	35.59	35.62	35.83
1.88333	33.51	33.69	34.74	35.46	35.15			35.44	36.19	36.01	36.39	35.97			32.84	35.96	34.68	36.41	35.34	35.57	36.64	35.56	35.72	36.19	35.95	35.53	35.7	35.85
1.9	33.47	33.84	34.72	35.48	35.42			35.44	36.29	36	36.34	35.95			32.48	36.02	34.66	36.43	35.53	35.94	36.58	35.46	35.72	36.19	36.06	35.49	35.76	35.83
1.91667	33.6	33.97	34.82	35.51	35.6			35.43	36.29	35.98	36.3	35.92			32.32	36.03	34.65	36.56	35.72	36.13	36.48	35.45	35.71	36.17	36.17	35.46	35.87	35.79
1.93333	33.73	33.99	35.01	35.51	35.55			35.43	36.24	35.94	36.29	35.9			32.19	35.99	34.69	36.58	35.88	36.22	36.37	35.47	35.69	36.18	36.28	35.48	36.11	35.78
[truncated: 244 more rows]

## Sheet: CapIT AMG517
Time	Veh-IT-AMG					Veh-IT-Veh					Cap-IT-AMG					Cap-IT-Veh
[truncated: 422 more rows]

[truncated: 4 more sheets: CalcaKO Cap, CalcaKO AMG517, AUC Cap, AUC AMG517]
