# Supplementary material for: TRPV1 drugs alter core body temperature via central projections of primary afferent sensory neurons
Source: eLife. 2022 Aug 15;11:e80139. doi: 10.7554/eLife.80139 (PMC9377796; doi:10.7554/eLife.80139)
Supplement: Figure 2—source data 1. [file elife-80139-fig2-data1.xlsx]

## Sheet: PirtCre Cap
Time	Trpv1fl/fl	Trpv1fl/fl	Trpv1fl/fl	Trpv1fl/fl	Trpv1fl/fl	Trpv1fl/fl	PirtCre;Trpv1fl/fl	PirtCre;Trpv1fl/fl	PirtCre;Trpv1fl/fl	PirtCre;Trpv1fl/fl	PirtCre;Trpv1fl/fl	PirtCre;Trpv1fl/fl
	Q234	Q235	Q261	R274			Q233	Q259	Q260	R275	R276	R277
-1	-0.05803	0.041858	-0.14874	-0.16377			0.015301	-0.0106	-0.16388	-0.20809	-0.08284	-0.4235
-0.98333	-0.2547	-0.07481	-0.18208	-0.10377			-0.01803	0.116066	-0.09388	-0.17475	-0.11617	-0.49016
-0.96667	-0.3247	-0.33481	-0.17208	-0.03377			-0.0247	0.162732	-0.03721	-0.20142	-0.10617	-0.52016
-0.95	-0.41137	-0.36481	-0.20541	-0.05377			-0.03137	0.142732	0.022787	-0.22809	-0.02284	-0.53016
-0.93333	-0.4347	-0.35481	-0.22874	-0.13377			-0.1147	0.129399	0.076121	-0.24142	0.017158	-0.53683
-0.91667	-0.40137	-0.34481	-0.18874	-0.14044			-0.21137	0.149399	0.169454	-0.34475	-0.01284	-0.50683
-0.9	-0.41803	-0.33148	-0.09208	-0.13377			-0.2547	0.186066	0.142787	-0.42475	-0.03951	-0.5235
-0.88333	-0.44137	-0.28814	0.02459	-0.0971			-0.2347	0.229399	0.129454	-0.47809	0.010491	-0.6435
-0.86667	-0.35137	-0.28148	0.107923	0.07623			-0.21803	0.269399	0.25612	-0.46142	-0.01617	-0.68016
-0.85	-0.1447	-0.29481	0.177923	0.22623			-0.32137	0.292732	0.35612	-0.44475	-0.20284	-0.65016
-0.83333	0.105301	-0.29814	0.197923	0.179563			-0.31803	0.292732	0.39612	-0.37142	-0.25951	-0.57683
-0.81667	0.188634	-0.28148	0.187923	0.022896			-0.2247	0.306066	0.216121	-0.30809	-0.26951	-0.51683
-0.8	0.205301	-0.27148	0.11459	-0.04044			-0.1647	0.332732	0.046121	-0.27809	-0.34951	-0.49683
-0.78333	0.245301	-0.27148	0.03459	-0.09044			-0.14803	0.252732	0.156121	-0.21809	-0.28951	-0.3835
-0.76667	0.248634	-0.24481	-0.02208	-0.21377			-0.09803	0.146066	0.209454	-0.17475	-0.32951	-0.29016
-0.75	0.218634	-0.20814	-0.04208	-0.24044			-0.04803	0.046066	0.069454	-0.11475	-0.38617	-0.2835
-0.73333	0.215301	-0.19814	-0.03874	-0.3371			0.095301	-0.0706	0.026121	-0.06475	-0.53951	-0.2935
-0.71667	0.178634	-0.21148	-0.02541	-0.41377			0.195301	-0.2306	0.139454	-0.01475	-0.55617	-0.2835
-0.7	0.108634	-0.18814	0.00459	-0.44044			0.295301	-0.5106	0.369454	-0.05475	-0.50617	-0.20016
-0.68333	0.055301	-0.07481	0.021257	-0.49711			0.265301	-0.65393	0.32612	-0.09142	-0.43617	-0.1435
-0.66667	-0.01803	-0.07481	-0.06874	-0.50711			0.248634	-0.52727	0.166121	-0.09809	-0.24284	-0.12016
-0.65	-0.07137	-0.10148	-0.14874	-0.49044			0.238634	-0.67393	0.062787	-0.06809	-0.11617	-0.1035
-0.63333	-0.1147	-0.11814	-0.13874	-0.45044			0.221968	-0.69727	-0.06721	-0.04475	-0.07951	-0.0635
-0.61667	-0.1247	0.001858	-0.08874	-0.42044			0.278634	-0.65727	-0.14055	-0.04475	-0.03951	-0.0335
-0.6	-0.12137	0.108525	-0.02208	-0.23044			0.305301	-0.60727	-0.11388	-0.02142	-0.06617	-0.0035
-0.58333	-0.1447	0.165192	0.00459	-0.05044			0.265301	-0.5806	-0.11055	0.001913	-0.02284	0.026503
-0.56667	-0.16803	0.195192	-0.01208	0.03623			0.231968	-0.50727	-0.13055	-0.00142	0.047158	0.049836
-0.55	-0.08803	0.308525	-0.07874	0.079563			0.198634	-0.46393	-0.18055	0.011913	0.070491	0.079836
-0.53333	0.055301	0.461858	-0.09541	0.149563			0.161968	-0.4206	-0.25055	-0.01809	0.040491	0.079836
-0.51667	0.118634	0.575192	-0.09208	0.199563			-0.0247	-0.43393	-0.34721	-0.07142	0.040491	0.109836
-0.5	0.078634	0.581858	-0.05874	0.252896			-0.1347	-0.4606	-0.45055	-0.11475	0.063825	0.126503
-0.48333	-0.06137	0.508525	0.03459	0.432896			-0.1747	-0.40393	-0.47721	-0.17809	0.083825	0.149836
-0.46667	-0.2347	0.478525	0.10459	0.469563			-0.14137	-0.3506	-0.46055	-0.16809	0.113825	0.186503
-0.45	-0.31137	0.435192	0.141257	0.352896			-0.09803	-0.3106	-0.53055	-0.09475	0.133825	0.219836
-0.43333	-0.2847	0.151858	0.14459	0.349563			-0.11137	-0.27727	-0.52055	0.005246	0.153825	0.216503
-0.41667	-0.2047	-0.00481	0.18459	0.27623			-0.0947	-0.20393	-0.52055	0.118579	0.170491	0.20317
-0.4	-0.00803	-0.06814	0.197923	0.349563			-0.0447	-0.1306	-0.51055	0.215246	0.193825	0.133169
-0.38333	0.048634	-0.13148	0.11459	0.56623			-0.0247	-0.06727	-0.36388	0.331913	0.190491	0.129836
-0.36667	0.095301	-0.16814	0.067923	0.689563			-0.03137	0.032732	-0.29055	0.401913	0.177158	0.169836
-0.35	0.065301	-0.14481	0.037923	0.709563			-0.04137	0.122732	-0.13721	0.451913	0.170491	0.186503
-0.33333	-0.05803	-0.04814	0.001257	0.659563			-0.01137	0.192732	0.019454	0.425246	0.173825	0.219836
-0.31667	-0.13803	0.025191	-0.03541	0.502896			0.105301	0.206066	-0.12721	0.351913	0.137158	0.249836
-0.3	-0.07137	0.028525	-0.06541	0.089563			0.068634	0.229399	-0.20721	0.271913	0.110491	0.286503
-0.28333	0.011968	0.071858	-0.07541	-0.24044			0.021967	0.232732	-0.24388	0.268579	0.123825	0.329836
-0.26667	0.101967	0.098525	-0.03208	-0.2671			0.088634	0.216066	-0.19721	0.345246	0.157158	0.35317
-0.25	0.191967	0.068525	0.071257	-0.18044			0.071967	0.139399	-0.10721	0.388579	0.200491	0.379836
-0.23333	0.301968	0.051858	0.127923	-0.0771			0.045301	0.112732	-0.05055	0.388579	0.183825	0.346503
-0.21667	0.268634	0.085191	0.127923	0.129563			0.011967	0.109399	-0.02055	0.371913	0.133825	0.32317
-0.2	0.201967	0.098525	0.04459	0.072896			0.001967	0.162732	0.032787	0.331913	0.160491	0.30317
-0.18333	0.178634	0.088525	0.00459	-0.18044			0.048634	0.212732	0.106121	0.245246	0.293825	0.319836
-0.16667	0.191967	0.075191	-0.10874	-0.22377			0.018634	0.249399	0.166121	0.298579	0.327158	0.339836
-0.15	0.141967	0.098525	-0.16541	-0.09044			-0.03803	0.256066	0.202787	0.385246	0.137158	0.35317
-0.13333	0.041968	0.145192	-0.14874	-0.09044			0.041967	0.219399	0.239454	0.418579	0.033825	0.316503
-0.11667	-0.0047	0.188525	-0.05208	-0.14377			0.101968	0.129399	0.279454	0.325246	-0.04617	0.309836
-0.1	0.055301	0.175192	-0.00874	-0.1671			0.151968	0.066066	0.282787	0.191913	-0.02284	0.336503
-0.08333	0.078634	0.141858	0.031257	-0.1471			0.175301	0.222732	0.299454	0.138579	0.133825	0.37317
-0.06667	0.188634	0.181858	0.067923	-0.02044			0.011967	0.422732	0.269454	0.071913	0.220491	0.396503
-0.05	0.285301	0.171858	0.13459	-0.01044			-0.09803	0.559399	0.312787	-0.06475	0.247158	0.416503
-0.03333	0.361968	0.061858	0.121257	-0.00377			-0.1447	0.676066	0.419454	-0.21809	0.227158	0.379836
-0.01667	0.281968	-0.03814	0.107923	0.119563			-0.1647	0.739399	0.44612	-0.32475	0.220491	0.396503
0	0.351968	-0.05481	0.097923	0.132896			-0.1747	0.686066	0.439454	-0.32809	0.257158	0.499836
0.016667	0.358634	-0.00481	0.08459	0.119563			-0.29803	0.689399	0.449454	-0.24809	0.250491	0.556503
0.033333	0.291968	0.138525	0.117923	0.149563			-0.35803	0.752732	0.43612	-0.18142	0.203825	0.619836
0.05	0.755301	0.175192	0.16459	0.117896			-0.29803	0.426066	0.486121	-0.18475	0.283825	0.576503
0.066667	0.566968	0.228525	0.20459	0.25623			-0.0647	0.392732	0.526121	-0.11475	0.323825	0.416503
0.083333	0.438333	0.213333	0.133333	-0.37333			0.21	0.086667		0.381667	0.663333	0.16
0.1	0.066667	0.22	0.24	-0.25667			0.02	-0.1	-0.03667	0.57	0.553333	0.073333
0.116667	-0.03	0.176667	0.273333	-0.21			0.103333	-0.40667	0.206667	0.343333	0.45	0.066667
0.133333	-0.14333	0.333333	0.143333	-0.34667			0.465	-0.34667	0.413333	0.14	0.34	0.063333
0.15	-0.12667	0.405	0.08	-0.28			0.236667	-0.33333	0.343333	-0.06667	0.263333	0.196667
0.166667	-0.28667	0.133333	-0.05	-0.38			0.103333	-0.50333	0.286667	-0.30667	0.213333	0.28
0.183333	-0.47333	-0.03333	-0.16333	-0.49667			0.186667	-0.5	0.556667	-0.52667	0.251667	0.29
0.2	-0.53	-0.18	-0.13	-0.68333			0.226667	-0.44667	0.873333	-0.67667	0.583333	0.156667
0.216667	-0.64333	-0.28667	-0.32667	-0.75667			0.11	-0.38333	0.633333	-0.73	0.546667	-0.06333
0.233333	-0.73	-0.41	-0.78667	-0.99			0.006667	-0.45667	0.406667	-0.77667	0.446667	-0.42833
0.25	-0.97667	-0.66333	-1.09333	-1.28667			-0.08333	-0.45667	0.4	-0.77667	0.343333	-0.42167
0.266667	-1.50333	-0.93667	-1.24333	-1.57			-0.17333	-0.34333	0.273333	-0.72	0.236667	-0.35333
0.283333	-1.87667	-1.16	-1.40333	-1.86667			-0.42667	-0.38667	0.166667	-0.85	-0.05667	-0.29
0.3	-2.01667	-1.35667	-1.48	-2.07333			-0.65667	-0.19	0.19	-0.91333	-0.32	-0.24
0.316667	-2.08333	-1.49	-1.54333	-2.32667			-0.69333	0.053333	0.09	-0.89	-0.43	-0.19
0.333333	-2.14667	-1.63333	-1.54	-2.59			-0.74333	0.113333	0.043333	-0.93333	-0.49333	-0.15667
0.35	-2.24333	-1.77667	-1.76	-2.83			-0.80333	0.24	0.216667	-1.06667	-0.57667	-0.14333
0.366667	-2.54333	-1.97333	-2.06	-3.00667			-0.82	0.216667	0.406667	-1.12667	-0.69	-0.19
0.383333	-2.84333	-2.16	-2.35667	-3.08			-0.91	0.086667	0.45	-1.11	-0.75	-0.29667
0.4	-3.01	-2.34	-2.62667	-3.02667			-1.02333	-0.07667	0.406667	-1.03667	-0.71333	-0.35
0.416667	-3.10667	-2.5	-2.81333	-3.08			-1.15	-0.10333	0.34	-1.02667	-0.68	-0.42
0.433333	-3.22	-2.67333	-3.01	-3.30667			-1.07667	0	0.236667	-1.04333	-0.69667	-0.46333
0.45	-3.33	-2.88	-3.28667	-3.32			-0.94	0.19	0.18	-1.05	-0.77667	-0.4
0.466667	-3.4	-2.99	-3.53333	-2.795			-0.87667	0.33	0.146667	-1.02333	-0.79667	-0.39667
0.483333	-3.33667	-3.13667	-3.81667	-2.905			-0.94333	0.363333	0.143333	-1.01667	-0.8	-0.46333
0.5	-3.24667	-3.31333	-4	-2.97833			-1.09667	0.486667	0.276667	-0.99333	-0.76667	-0.54333
0.516667	-3.32667	-3.5	-4.07	-3.03833			-1.13	0.57	0.356667	-0.98333	-0.66	-0.55667
0.533333	-3.40667	-3.63333	-4.19333	-3.07333			-0.99333	0.703333	0.393333	-1.05333	-0.60333	-0.50667
0.55	-3.52667	-3.75333	-4.41	-3.12667			-0.87	0.796667	0.303333	-1.05333	-0.47667	-0.53333
0.566667	-3.64333	-3.95	-4.59667	-3.19667			-0.73333	0.836667	0.256667	-1.08	-0.43	-0.52
0.583333	-3.76	-4.11	-4.80333	-2.48667			-0.67	0.9	0.23	-1.09	-0.39667	-0.44
0.6	-3.82667	-4.14667	-4.88333	-2.66333			-0.65	0.86	0.13	-1.16333	-0.42333	-0.37333
0.616667	-3.78333	-4.18333	-4.93667	-2.71			-0.81667	0.64	0.153333	-1.27667	-0.36	-0.35
0.633333	-3.87	-4.34667	-5.04	-2.61			-1.06	0.596667	0.13	-1.35667	-0.38	-0.24333
0.65	-4.04333	-4.57333	-5.07333	-2.48667			-1.19	0.713333	0.066667	-1.30667	-0.44333	-0.18333
0.666667	-4.13	-4.67333	-5.05333	-2.45			-1.21667	0.726667	0.02	-1.26	-0.47333	-0.15667
0.683333	-4.26	-4.75	-5.08	-2.69333			-1.20333	0.883333	0.016667	-1.26333	-0.52333	-0.00333
0.7	-4.46	-4.84333	-5.09333	-2.91333			-1.29333	1.06333	0.18	-1.28333	-0.55333	0.186667
0.716667	-4.56333	-4.96333	-5.06667	-3.04			-1.28	1.06667	0.126667	-1.35333	-0.53333	0.403333
0.733333	-4.59667	-4.97667	-4.95	-3.14			-1.28333	1.15	-0.05333	-1.41	-0.54	0.48
0.75	-4.62667	-4.96667	-4.94333	-3.07			-1.31667	1.22333	-0.17333	-1.45667	-0.56	0.586667
0.766667	-4.60667	-4.97333	-5.09333	-2.99667			-1.39	1.24333	-0.12667	-1.49	-0.56667	0.613333
0.783333	-4.58	-4.98333	-5.11	-3.09			-1.49	1.19	-0.01667	-1.53333	-0.55	0.516667
0.8	-4.57667	-5.01	-5.05667	-3.09			-1.65	1.10333	0.15	-1.59667	-0.51333	0.553333
0.816667	-4.55	-5.06333	-5.09	-3.03			-1.83667	1.04667	0.336667	-1.58667	-0.44	0.61
0.833333	-4.50667	-5.1	-5.11	-2.88667			-1.97333	1.01	0.463333	-1.56667	-0.40333	0.67
0.85	-4.53333	-5.08667	-5.05667	-2.85			-2.05333	1.02667	0.396667	-1.54	-0.45	0.756667
0.866667	-4.61667	-5.11	-5.06333	-2.81			-2.09333	1.05	-0.00333	-1.57667	-0.43667	0.796667
0.883333	-4.84	-5.17333	-5.07333	-2.75333			-2.18333	1.03667	-0.16333	-1.63	-0.35333	0.806667
0.9	-4.99333	-5.26	-5.07667	-2.76667			-2.24667	1.05	-0.10333	-1.69667	-0.26667	0.816667
0.916667	-5.02667	-5.31667	-5.05667	-2.91333			-2.18	1.10667	0.023333	-1.69	-0.24667	0.95
0.933333	-4.96667	-5.34333	-4.94667	-3.05333			-2.04333	1.24333	0.01	-1.68	-0.29	1.12
0.95	-4.92	-5.37667	-4.83667	-3.34			-1.82667	1.58667	0.01	-1.72	-0.27	1.23333
0.966667	-4.91667	-5.38	-4.89	-3.68667			-1.77	1.79	0.09	-1.75667	-0.23333	1.39
0.983333	-4.94333	-5.38667	-4.95667	-3.8			-1.77	1.81	0.18	-1.74667	-0.08667	1.5
1	-5.01333	-5.41667	-4.99	-3.77			-1.72667	1.73667	0.243333	-1.72	-0.06	1.52
1.01667	-5.11333	-5.37667	-5.02	-3.62333			-1.64	1.72	0.14	-1.7	-0.04333	1.45667
1.03333	-4.98	-5.28333	-5.05667	-3.77			-1.74667	1.73	0.066667	-1.73333	-0.03667	1.44667
1.05	-4.85333	-5.24333	-5.03333	-3.91667			-1.94667	1.75	0.123333	0.656667	-0.1	1.47667
1.06667	-4.85667	-5.26667	-4.95	-3.96333			-2.02667	1.83333	0.29	0.708333	0	1.48667
1.08333	-4.93333	-5.25333	-4.85333	-4.01333			-2.12333	1.9	0.393333	0.656667	0.07	1.5
1.1	-5.10333	-5.23667	-4.81333	-4.07333			-2.22	1.95	0.376667	0.581667	0.106667	1.53667
1.11667	-5.25333	-5.24333	-4.76	-4.08			-2.29333	2.18	0.403333	0.6	0.126667	1.55333
1.13333	-5.30667	-5.20333	-4.73667	-3.99667			-2.34333	0.991667	0.483333	-1.81667	0.116667	1.61
1.15	-5.26	-5.08333	-4.67333	-3.73333			-2.39667	0.845	0.643333	-1.77333	0.07	1.64
1.16667	-5.14333	-5.01	-4.66333	-3.55333			-2.35	0.876667	0.583333	-1.74667	0.06	1.64
1.18333	-5.17	-4.97	-4.67667	-3.44333			-2.23333	0.915	0.42	-1.72	0.136667	1.59
1.2	-5.26667	-4.94667	-4.63	-3.40667			-2.27	0.858333	0.386667	-1.70667	0.163333	1.57
1.21667	-5.23	-4.93	-4.54333	-3.39			-2.28	0.82	0.08	-1.70333	0.173333	1.59
1.23333	-5.31333	-4.87	-4.50333	-3.35			-2.27333	0.863333	-0.53	-1.68333	0.183333	1.62667
1.25	-5.42667	-4.84667	-4.46	-3.36333			-2.30333	0.913333	-0.38333	-1.76333	0.223333	1.64667
1.26667	-5.53	-4.73333	-4.47333	-3.36333			-2.34333	0.87	-0.09333	-1.82667	0.36	1.61667
1.28333	-5.58333	-4.45667	-4.5	-3.21333			-2.23	0.79	0.12	-1.87	0.413333	1.60333
1.3	-5.66333	-4.36333	-4.46667	-3.17333			-2.30333	0.808333	0.1	-1.94667	0.473333	1.59333
1.31667	-5.69	-4.35333	-4.49667	-3.22			-2.35667	0.846667	0.26	-1.95667	0.53	1.64667
1.33333	-5.67667	-4.31	-4.52667	-3.18333			-2.36	0.87	0.41	-1.94667	0.58	1.75
1.35	-5.75667	-4.37	-4.49667	-2.95667			-2.37	0.87	0.49	-1.99333	0.506667	1.78333
1.36667	-5.8	-4.39667	-4.46667	-2.7			-2.40667	0.871667	0.626667	-2.14333	0.523333	1.79667
1.38333	-5.75333	-4.31667	-4.49	-3.17667			-2.44667	0.926667	1.03667	-2.15667	0.553333	1.82
1.4	-5.84	-4.27	-4.41	-3.27333			-2.41333	0.936667	1.24667	-2.13333	0.52	1.84333
1.41667	-5.82667	-4.23667	-4.34333	-3.32667			-2.41333	0.951667	1.24667	-2.16667	0.54	1.89
1.43333	-5.79667	-4.14333	-4.33667	-3.13167			-2.39333	0.983333	1.23667	-2.22	0.603333	1.90333
1.45	-5.78667	-4.07	-4.43667	-3.09833			-2.35	1.135	1.30667	-2.27	0.653333	1.91
1.46667	-5.73333	-4.06333	-4.48	-3.64			-2.31	1.18833	1.36667	-2.21	0.693333	1.93
1.48333	-5.71667	-4.05333	-4.46333	-3.65			-2.35	1.14833	1.39667	-2.15333	0.71	1.94333
1.5	-5.69333	-4.23333	-4.43	-3.45333			-2.56333	1.06	1.05667	-2.12333	0.683333	1.95667
1.51667	-5.73	-4.37333	-4.45333	-3.36333			-2.73333	1.07	0.916667	-2.07333	0.673333	1.96667
1.53333	-5.74333	-4.36	-4.45	-3.32667			-2.80333	1.12833	0.956667	-2.09	0.82	1.97
1.55	-5.70667	-4.26	-4.36333	-3.22667			-2.76	1.18833	0.913333	-2.13667	1.06333	1.94667
1.56667	-5.75	-4.09333	-4.3	-3.2			-2.63667	1.20167	0.936667	-2.05667	1.21333	1.89333
1.58333	-5.82667	-3.85333	-4.27	-3.35333			-2.55667	1.165	0.903333	-1.92333	1.22333	1.78
1.6	-6.08667	-3.71	-4.17333	-3.41333			-2.52667	1.135	0.826667	-1.91667	1.16333	1.71667
1.61667	-6.23333	-3.50667	-4.08333	-3.46			-2.57	1.07333	0.733333	-1.91333	0.993333	1.70667
1.63333	-6.28333	-3.61333	-4.05667	-3.59333			-2.74667	1.00667	0.633333	-1.84333	0.96	1.7
1.65	-6.23667	-3.59333	-4.05	-3.47333			-2.84667	0.873333	0.586667	-1.8	0.963333	1.69333
1.66667	-6.19	-3.42	-3.97	-3.38			-2.87667	0.773333	0.603333	-1.82333	0.98	1.66333
1.68333	-6.14667	-3.39667	-3.86667	-3.43333			-2.85333	0.676667	0.633333	-1.81333	1.06667	1.67333
1.7	-6.01667	-3.48333	-3.74667	-3.44333			-2.83667	0.59	0.786667	-1.80667	1.12667	1.71333
1.71667	-5.96667	-3.49333	-3.60333	-3.39333			-2.9	0.47	0.916667	-1.78333	1.11333	1.73
1.73333	-5.99667	-3.38667	-3.53667	-3.28667			-2.9	0.41	0.736667	-1.77	1.07333	1.69333
1.75	-5.95333	-3.23333	-3.44333	-3.16333			-2.93333	0.32	0.666667	-1.74333	1	1.69333
1.76667	-5.9	-3.05	-3.25	-3.11667			-2.97	0.173333	0.686667	-1.59333	0.963333	1.71667
1.78333	-5.81667	-2.85	-3.11333	-2.95667			-2.95667	0.015	0.706667	-1.56333	0.956667	1.73667
1.8	-5.76333	-2.74333	-2.99	-2.80667			-2.85	-0.045	0.633333	-1.57667	0.946667	1.78333
1.81667	-5.69667	-2.68	-2.92	-2.63			-2.76333	-0.12833	0.48	-1.5	0.953333	1.77667
1.83333	-5.52667	-2.65667	-2.85	-2.47			-2.51	-0.325	0.396667	-1.55333	0.973333	1.8
1.85	-5.37667	-2.72	-2.77667	-2.47			-2.43	-0.385	0.366667	-1.66667	0.97	1.8
1.86667	-5.39	-2.66	-2.72	-2.41333			-2.44	-0.40333	0.386667	-1.65	0.973333	1.79667
1.88333	-5.39333	-2.56	-2.66333	-2.32333			-2.39667	-0.23167	0.46	-1.42333	0.976667	1.81333
1.9	-5.29333	-2.43667	-2.59	-2.21			-2.35333	-0.12	0.576667	-1.26667	0.963333	1.86333
1.91667	-5.13667	-2.3	-2.51333	-2.08			-2.49667	-0.26333	0.57	-1.29	0.926667	1.86333
1.93333	-4.99667	-2.21	-2.42	-2.06333			-2.69667	-0.38	0.523333	-1.32	0.866667	1.82333
1.95	-4.88	-2.24	-2.32333	-2.06333			-2.70333	-0.42167	0.476667	-1.31333	0.863333	1.74333
1.96667	-4.84667	-2.21667	-2.28333	-1.98667			-2.56333	-0.36	0.453333	-1.27	0.88	1.62667
1.98333	-4.93667	-2.14	-2.25	-1.86			-2.45667	-0.37833	0.443333	-1.24	0.9	1.62667
2	-4.97333	-2.11	-2.20667	-1.66333			-2.38333	-0.51667	0.433333	-1.20333	0.973333	1.52667
2.01667	-4.83	-2.04333	-2.19	-1.47333			-2.34667	-0.59	0.516667	-1.1	0.94	1.37667
2.03333	-4.90667	-1.93	-2.18667	-1.34667			-2.43667	1.20333	0.603333	-1.07	0.823333	1.26
2.05	-4.96333	-1.84	-2.17	-1.23333			-2.45333	1.21333	0.603333	-1.07333	0.736667	1.19667
2.06667	-4.98333	-1.89	-2.16	-1.24667			-2.40667	1.19333	0.6	-1.11	0.706667	1.16
2.08333	-4.88	-1.94	-2.15667	-1.53			-2.39	1.12667	0.583333	-1.08667	0.68	1.13333
2.1	-4.87667	-1.91667	-2.13333	-1.55333			-2.40333	1.06667	0.533333	-1.09	0.6	1.06333
2.11667	-4.90667	-1.86333	-2.05	-1.42			-2.4	1.03	0.553333	-1.11333	0.513333	1.04333
2.13333	-4.93333	-1.76	-2.02667	-1.30667			-2.34	1.07333	0.7	-1.12667	0.476667	1.07
2.15	-4.89	-1.58333	-2.07	-1.45			-2.29333	1.04667	0.766667	-1.12667	0.446667	1.18
2.16667	-4.75667	-1.49667	-2.02667	-1.62667			-2.29333	1.05333	1.00333	-1.18333	0.43	1.21333
2.18333	-4.71333	-1.45	-1.97667	-1.58			-2.32333	1.01667	0.933333	-1.25667	0.396667	1.19333
2.2	-4.72333	-1.39	-2.00667	-1.51			-2.29667	0.97	0.643333	-1.2	0.356667	1.19333
2.21667	-4.5	-1.31667	-2.04	-1.55667			-2.34	0.926667	0.453333	-1.12333	0.37	1.18333
2.23333	-4.41	-1.18333	-2.06667	-1.56333			-2.37	1.02667	0.416667	-1.08333	0.46	1.06
2.25	-4.37667	-0.92	-2.04333	-1.55333			-2.34333	0.986667	0.416667	-1.03333	0.556667	1.08
2.26667	-4.31667	-0.77333	-1.89333	-1.65333			-2.32	0.923333	0.383333	-1.01333	0.46	1.17333
2.28333	-4.23	-0.79	-1.81	-1.59			-2.31333	0.75	0.376667	-0.97667	0.336667	1.17667
2.3	-4.15333	-0.75667	-1.87667	-1.33			-2.29333	0.516667	0.443333	-0.96	0.093333	1.11333
2.31667	-4.11333	-0.96333	-1.86	-1.24667			-2.26333	0.47	0.33	-0.91333	0.003333	1.11667
2.33333	-4.19667	-1.04	-1.83333	-1.11333			-2.29	0.453333	0.25	-0.84667	-0.00667	1.11667
2.35	-4.30667	-1.08333	-1.86	-0.91667			-2.31667	0.58	0.263333	-0.95667	-0.05333	1.08667
2.36667	-4.28333	-1.06333	-1.84333	-0.97			-2.26333	0.643333	0.223333	-0.97333	-0.11	1.05333
2.38333	-4.18333	-0.98	-1.77	-1.32333			-2.20333	0.673333	0.173333	-0.87667	-0.10333	1.04333
2.4	-4.15	-1.01333	-1.68667	-1.46333			-2.18667	0.76	0.16	-0.78	-0.09333	1.07333
2.41667	-4.04333	-1.12	-1.62	-1.47333			-2.12667	0.79	0.156667	-0.60333	-0.08	1.07
2.43333	-4.09333	-1.09333	-1.55333	-1.42333			-2.15333	0.746667	0.21	-0.5	-0.02333	1.01667
2.45	-4.05	-1.05333	-1.48333	-1.36667			-2.14667	0.723333	0.386667	-0.45333	-0.04	1.02
2.46667	-3.90667	-0.94	-1.38333	-1.27			-2.18667	0.656667	0.476667	-0.49667	0.026667	1.02333
2.48333	-3.80667	-0.83	-1.37	-1.24333			-2.27667	0.283333	0.513333	-0.61333	0.11	0.996667
2.5	-3.73333	-0.74333	-1.36	-1.09333			-2.34333	0.026667	0.476667	-0.67667	0.063333	0.956667
2.51667	-3.64333	-0.73667	-1.34	-0.99			-2.41333	-0.11667	0.473333	-0.76333	-0.10333	0.936667
2.53333	-3.56667	-0.80333	-1.31667	-1.09333			-2.43667	-0.22	0.46	-0.81333	-0.14667	0.93
2.55	-3.47333	-0.84333	-1.28333	-1.05333			-2.38	-0.32333	0.36	-0.72667	-0.05333	0.983333
2.56667	-3.39333	-0.8	-1.27667	-0.97667			-2.28333	-0.38667	0.31	-0.68667	0.023333	1.01333
2.58333	-3.26	-0.78333	-1.26333	-0.94667			-2.07333	-0.45	0.263333	-0.70667	0.023333	0.97
2.6	-3.16667	-0.76	-1.26333	-0.78			-1.94667	-0.58667	0.24	-0.73	-0.13	0.96
2.61667	-3.07	-0.63667	-1.23	-0.63333			-2.01667	-0.71	0.256667	-0.73667	-0.34667	0.91
2.63333	-2.96333	-0.47667	-1.09667	-0.7			-2.08	-0.65333	0.286667	-0.70333	-0.35667	0.856667
2.65	-2.97667	-0.43667	-1.03667	-0.92			-2.07667	-0.63	0.31	-0.59667	-0.14	0.806667
2.66667	-2.98	-0.48	-0.99	-1.09			-2.05	-0.49	0.23	-0.53667	0.066667	0.693333
2.68333	-2.96	-0.40333	-0.97333	-1.16			-2.00667	-0.41	0.17	-0.53667	0.13	0.626667
2.7	-3.04	-0.29333	-1.05667	-1.26333			-1.99667	-0.40667	0.116667	-0.64	0.06	0.633333
2.71667	-3.18	-0.24667	-1.06667	-1.31333			-2.03333	-0.58	0.126667	-0.71333	0.053333	0.6
2.73333	-3.04	-0.39667	-1.06333	-1.2			-2.05333	-0.81667	0.01	-0.75333	0.093333	0.57
2.75	-2.84667	-0.50333	-1.11667	-1.07			-1.96333	-0.89333	-0.08667	-0.73333	0.256667	0.576667
2.76667	-2.53333	-0.44667	-1.10333	-0.84333			-1.91333	-0.85	-0.08333	-0.72667	0.333333	0.563333
2.78333	-2.07333	-0.41	-1.03333	-0.81333			-1.89667	-0.89667	-0.07333	-0.71333	0.346667	0.563333
2.8	-1.97667	-0.35667	-0.98333	-0.86667			-1.90333	-0.94667	-0.06667	-0.71667	0.436667	0.52
2.81667	-1.97	-0.32667	-0.96	-0.90333			-1.93	-0.99	-0.03333	-0.73667	0.57	0.46
2.83333	-1.89333	-0.25333	-0.85333	-0.94667			-1.94667	-1.04	0.006667	-0.68	0.57	0.503333
2.85	-1.84	-0.14667	-0.73	-0.96333			-1.8	-1.02333	0.06	-0.65333	0.55	0.523333
2.86667	-1.93667	-0.07333	-0.73	-0.88667			-1.66333	-0.97	0.096667	-0.64	0.51	0.483333
2.88333	-1.99667	0.006667	-0.77333	-0.86333			-1.63333	-0.86667	0.113333	-0.7	0.503333	0.483333
2.9	-1.83667	0.053333	-0.74667	-0.77333			-1.64667	-0.71	0.19	-0.85667	0.54	0.526667
2.91667	-1.78667	0.083333	-0.71	-0.54			-1.77	-0.71333	0.213333	-0.90333	0.56	0.413333
2.93333	-1.79667	0.076667	-0.68333	-0.38333			-1.81	-0.75333	0.263333	-0.86333	0.56	0.38
2.95	-1.75667	0.113333	-0.64333	-0.28333			-1.84333	-0.86333	0.286667	-0.83333	0.566667	0.35
2.96667	-1.67333	0.133333	-0.60333	-0.28667			-1.84667	-0.88	0.153333	-0.78667	0.47	0.36
2.98333	-1.64	0.156667	-0.64333	-0.52			-1.84333	-0.9	0.12	-0.76	0.48	0.34
3	-1.64	0.186667	-0.65333	-0.75			-1.85667	-0.92	0.113333	-0.72667	0.506667	0.276667
3.01667	-1.84333	0.2	-0.63333	-0.84333			-1.88	-0.95	0.123333	-0.67667	0.486667	0.23
3.03333	-1.91	0.073333	-0.52667	-0.79			-1.88	-1.11667	0.016667	-0.60333	0.436667	0.17
3.05	-1.78	0.05	-0.40667	-0.74333			-1.88	-1.17667	-0.09667	-0.6	0.353333	0.14
3.06667	-1.68667	0.06	-0.38	-0.86333			-1.87667	-1.17	-0.32667	-0.63333	0.35	0.223333
3.08333	-1.62667	0.003333	-0.38333	-0.99333			-1.88	-1.08667	-0.62667	-0.69667	0.276667	0.363333
3.1	-1.54	0.003333	-0.32	-0.89333			-1.88667	-0.97	-0.64667	-0.83	0.19	0.32
3.11667	-1.49	-0.03	-0.30667	-0.58			-1.88	-0.96667	-0.4	-0.83	0.133333	0.22
3.13333	-1.51333	-0.00333	-0.26333	-0.57333			-1.80333	-0.88	-0.17	-0.77667	0.12	0.096667
3.15	-1.53	0.016667	-0.22	-0.64667			-1.75	-0.83	0.076667	-0.73667	0.133333	-0.04333
3.16667	-1.50667	0.04	-0.19	-0.64333			-1.74667	-0.81	0.236667	-0.76667	0.11	-0.02667
3.18333	-1.45333	0.043333	-0.19	-0.47333			-1.72333	-0.77	0.133333	-0.77667	0.066667	-0.01
3.2	-1.4	0.063333	-0.20333	-0.39667			-1.7	-0.75	0.086667	-0.74667	-0.04667	0
3.21667	-1.47667	0.043333	-0.19333	-0.48333			-1.69667	-0.78	0.123333	-0.75	-0.05667	0.056667
3.23333	-1.51333	-0.07	-0.18333	-0.53333			-1.67333	-0.86	0.063333	-0.74667	0.023333	0.09
3.25	-1.47333	-0.07	-0.15333	-0.59			-1.64667	-0.93333	-0.04333	-0.73	0.036667	0.096667
3.26667	-1.4	-0.05	-0.12667	-0.51667			-1.64333	-0.93333	-0.04667	-0.73667	0.056667	0.02
3.28333	-1.33333	-0.06	-0.10667	-0.53			-1.65	-1.02333	0.023333	-0.75333	0.066667	-0.06
3.3	-1.26667	-0.05333	-0.07667	-0.58333			-1.65667	-1.01333	0.056667	-0.74667	0.08	-0.05333
3.31667	-1.20333	-0.14	-0.09	-0.52333			-1.65	-0.79	0.05	-0.74333	0.103333	-0.04333
3.33333	-1.13333	-0.16667	-0.17667	-0.38667			-1.59333	-0.74333	0.05	-0.78	0.066667	-0.05
3.35	-1.11333	-0.04333	-0.24	-0.34			-1.51	-0.71333	0.066667	-0.82667	0.116667	-0.05667
3.36667	-1.31667	0.093333	-0.27	-0.35			-1.44333	-0.66333	0.096667	-0.87333	0.15	-0.09333
3.38333	-1.55667	0.09	-0.29333	-0.38333			-1.39333	-0.68667	0.113333	-0.93667	0.136667	-0.11
3.4	-1.55	0.206667	-0.25667	-0.45			-1.34333	-0.73	0.106667	-1.07333	0.156667	-0.12667
3.41667	-1.51667	0.31	-0.18333	-0.32			-1.29	-0.79667	0.06	-1.13667	0.146667	-0.14
3.43333	-1.37667	0.363333	-0.16	-0.21333			-1.21333	-0.86	0.063333	-1.11333	0.166667	-0.12667
3.45	-1.28	0.366667	-0.17667	-0.24667			-1.18	-0.85667	0.156667	-1.08333	0.19	-0.14333
3.46667	-1.23	0.376667	-0.19333	-0.29333			-1.15333	-0.82667	0.25	-1.1	0.21	-0.13667
3.48333	-1.09333	0.386667	-0.18	-0.33			-1.09667	-0.75	0.303333	-1.04667	0.256667	-0.09667
3.5	-1.02667	0.396667	-0.12333	-0.30667			-1.08	-0.8	0.35	-0.95	0.126667	-0.05333
3.51667	-0.99333	0.4	-0.00667	-0.34			-1.15667	-0.85	0.31	-0.89333	0.046667	-0.01667
3.53333	-0.92333	0.426667	-0.01667	-0.41667			-1.06333	-0.83667	0.22	-0.88	0.02	0
3.55	-0.89	0.413333	-0.09333	-0.49667			-0.95667	-0.80333	0.153333	-0.79	0.033333	0.033333
3.56667	-0.87333	0.306667	-0.10667	-0.7			-0.90333	-0.78	0.143333	-0.73667	0.076667	0.07
3.58333	-0.80667	0.266667	-0.11	-0.89			-0.89667	-0.74667	0.256667	-0.78333	0.113333	0.126667
3.6	-0.75333	0.26	-0.04	-1.12			-0.92667	-0.67667	0.236667	-0.79333	0.136667	0.2
3.61667	-0.73	0.263333	0.066667	-1.14			-0.98	-0.61333	0.033333	-0.75667	0.16	0.25
3.63333	-0.67	0.27	0.09	-0.90667			-0.99333	-0.52333	-0.19667	-0.68333	0.256667	0.263333
3.65	-0.61333	0.28	0.11	-0.87333			-1.01667	-0.40333	-0.23333	-0.70333	0.276667	0.26
3.66667	-0.58333	0.226667	0.02	-0.86333			-1.1	-0.35667	-0.18333	-0.82667	0.316667	0.23
3.68333	-0.42667	0.23	-0.07667	-0.87667			-1.18	-0.35333	-0.12333	-0.82333	0.366667	0.203333
3.7	-0.17667	0.246667	-0.08	-0.91333			-1.17	-0.37667	-0.11	-0.67	0.396667	0.17
3.71667	0.036667	0.29	-0.02667	-1.06667			-1.12667	-0.37667	-0.05333	-0.58667	0.386667	0.146667
3.73333	0.103333	0.32	0.023333	-1.1			-1.00333	-0.34667	0.013333	-0.53	0.346667	0.143333
3.75	0.063333	0.296667	0.05	-1.11333			-0.97333	-0.31	-0.03	-0.50667	0.33	0.2
3.76667	-0.02667	0.263333	0.066667	-1.15667			-1.02667	-0.27667	0.003333	-0.53333	0.27	0.246667
3.78333	-0.00667	0.293333	0.07	-1.12667			-1.10667	-0.24	0.02	-0.57667	0.146667	0.276667
3.8	-0.03333	0.176667	0.063333	-1.08			-1.03333	-0.26	0.05	-0.60333	0.16	0.273333
3.81667	-0.1	0.06	0.083333	-1.17			-0.95	-0.27333	0.123333	-0.49667	0.21	0.266667
3.83333	-0.17333	0.02	0.096667	-1.28333			-0.97333	-0.22667	0.116667	-0.31667	0.24	0.263333
3.85	-0.18667	0.18	0.096667	-1.43667			-0.95667	-0.08	0.173333	-0.25333	0.173333	0.273333
3.86667	-0.15	0.36	0.063333	-1.41333			-0.96333	-0.06667	0.183333	-0.25667	0.08	0.26
3.88333	-0.4	0.483333	-0.00667	-1.32667			-1.00333	-0.07	0.163333	-0.22667	0.033333	0.253333
3.9	-0.54667	0.503333	-0.03333	-1.18667			-1.02	-0.06	0.116667	-0.20667	0.03	0.226667
3.91667	-0.61667	0.493333	-0.02333	-1.16			-1.02	-0.14	0.04	-0.21333	0.076667	0.15
3.93333	-0.71667	0.483333	-0.03333	-1.35			-1.00333	-0.29	-0.04667	-0.22	0.25	0.093333
3.95	-0.71333	0.483333	-0.03	-1.53			-0.99667	-0.44667	-0.09	-0.16	0.343333	0.076667
3.96667	-0.57	0.453333	-0.01333	-1.35333			-0.96667	-0.41667	-0.00333	-0.03333	0.333333	0.106667
3.98333	-0.46	0.436667	-0.06667	-1.42			-0.95	-0.40333	0.06	-0.01	0.21	0.17
4	-0.39	0.45	-0.1	-1.58333			-0.98333	-0.34667	0.09	-0.03	0.116667	0.2
4.01667	-0.37	0.446667	-0.10667	-1.56			-0.89667	-0.30667	0.1	0.01	0.103333	0.22
4.03333	-0.36333	0.406667	-0.14667	-1.37333			-0.89	-0.36333	0.376667	0.03	0.116667	0.243333
4.05	-0.34	0.376667	-0.17	-1.1			-0.96	-0.39	0.57	0.043333	0.08	0.243333
4.06667	-0.29667	0.363333	-0.14333	-0.97667			-0.99333	-0.59667	0.613333	0.08	0.073333	0.21
4.08333	-0.26667	0.386667	-0.08667	-0.96			-0.99333	-0.76	0.756667	0.06	0.1	0.18
4.1	-0.24333	0.443333	0.013333	-0.9			-0.97667	-0.94	0.92	0.026667	0.233333	0.16
4.11667	-0.25667	0.426667	0.043333	-0.55667			-0.98667	-0.99667	0.916667	0.056667	0.016667	0.143333
4.13333	-0.30667	0.37	0.073333	-0.46333			-1.03667	-0.99333	0.783333	0.106667	-0.34333	0.096667
4.15	-0.41333	0.303333	0.106667	-0.64			-1.04	-0.97667	0.436667	0.1	-0.33333	0.05
4.16667	-0.51	0.243333	0.136667	-0.84			-1.02333	-0.9	0.273333	0.056667	-0.27333	0.016667
4.18333	-0.57667	0.223333	0.106667	-0.93667			-1.07667	-0.89	0.24	0.046667	-0.19	-0.01
4.2	-0.55667	0.213333	0.066667	-0.92			-1.10333	-0.87	0.063333	0.103333	-0.14	-0.01667
4.21667	-0.52667	0.216667	0.056667	-0.76333			-1.04333	-0.89333	-0.1	0.176667	-0.03333	0.013333
4.23333	-0.55667	0.293333	0.086667	-0.52333			-0.98333	-0.83	-0.12333	0.196667	0.126667	0.03
4.25	-0.58	0.343333	0.08	-0.27667			-0.94333	-0.72667	0.05	0.156667	0.183333	0.046667
4.26667	-0.59667	0.393333	0.093333	-0.08			-0.94667	-0.65	0.253333	0.086667	0.216667	0.046667
4.28333	-0.56	0.42	0.146667	0.02			-0.97667	-0.61333	0.3	0.063333	0.113333	0.053333
4.3	-0.5	0.413333	0.176667	-0.05333			-0.96333	-0.53667	0.336667	0.05	0.05	0.136667
4.31667	-0.35	0.403333	0.17	-0.15333			-0.92333	-0.38333	0.41	0.066667	0.02	0.186667
4.33333	-0.30333	0.403333	0.14	-0.22667			-0.95333	-0.24333	0.276667	0.1	0.026667	0.19
4.35	-0.25667	0.466667	0.23	-0.45667			-0.94667	-0.18333	0.213333	0.14	0.033333	0.2
4.36667	-0.23	0.46	0.286667	-0.70333			-0.93333	-0.15	0.163333	0.14	-0.01	0.206667
4.38333	-0.22	0.446667	0.27	-0.8			-0.88333	-0.09667	0.133333	0.116667	-0.01333	0.226667
4.4	-0.17	0.463333	0.273333	-0.88667			-0.87	-0.25333	0.143333	0.023333	0.01	0.23
4.41667	-0.08333	0.43	0.306667	-0.88			-0.89667	-0.36667	0.116667	-0.10667	0.006667	0.27
4.43333	-0.05333	0.35	0.323333	-0.72			-0.96333	-0.41	0.063333	-0.20667	0.066667	0.32
4.45	-0.02333	0.323333	0.313333	-0.57333			-0.97667	-0.38	0.04	-0.21667	0.13	0.383333
4.46667	0.056667	0.343333	0.31	-0.49333			-0.92333	-0.35333	0.036667	-0.19	0.07	0.346667
4.48333	0.17	0.363333	0.306667	-0.54			-0.88667	-0.34	0.006667	-0.10667	-0.06667	0.363333
4.5	0.22	0.353333	0.283333	-0.56333			-0.87667	-0.38333	-0.06	-0.04	-0.10333	0.483333
4.51667	0.27	0.32	0.32	-0.67333			-0.88333	-0.37667	-0.07333	-0.00333	-0.14667	0.566667
4.53333	0.283333	0.21	0.333333	-0.72			-0.93333	-0.39667	-0.08	-0.04667	-0.19	0.613333
4.55	0.226667	0.103333	0.4	-0.70333			-0.94333	-0.44	-0.09333	-0.03	-0.24	0.683333
4.56667	0.22	0.11	0.423333	-0.63667			-0.97667	-0.59	-0.11333	0.006667	-0.34333	0.733333
4.58333	0.223333	0.303333	0.413333	-0.58			-1.04	-0.75667	-0.15	-0.07667	-0.34667	0.78
4.6	0.366667	0.396667	0.45	-0.52667			-1.06	-0.83667	-0.14	-0.11667	-0.33	0.816667
4.61667	0.33	0.433333	0.523333	-0.42333			-1.01	-0.82	-0.16	-0.12333	-0.25	0.816667
4.63333	0.273333	0.44	0.506667	-0.31667			-1.04	-0.78333	-0.16667	-0.08667	-0.16333	0.773333
4.65	0.256667	0.393333	0.5	-0.20667			-1.09667	-0.74333	-0.14	-0.06	-0.18	0.703333
4.66667	0.256667	0.39	0.446667	-0.05333			-1.11	-0.78	-0.05	0.006667	-0.15	0.663333
4.68333	0.246667	0.393333	0.38	0.02			-1.11667	-0.87667	0.056667	0.066667	-0.07667	0.69
4.7	0.226667	0.416667	0.42	0.023333			-1.18	-0.91667	0.1	0.103333	-0.02333	0.743333
4.71667	0.26	0.463333	0.386667	-0.00333			-1.16	-0.9	0.116667	0.073333	0.013333	0.726667
4.73333	0.31	0.526667	0.403333	-0.09667			-1.12333	-0.89333	0.12	0.013333	0.013333	0.633333
4.75	0.353333	0.563333	0.526667	-0.05			-1.15333	-0.90333	0.11	-0.00667	0.03	0.443333
4.76667	0.356667	0.586667	0.673333	-0.09			-1.18667	-0.86333	0.106667	0.02	0.04	0.35
4.78333	0.386667	0.53	0.696667	-0.07667			-1.21333	-0.81333	0.15	0.043333	0.02	0.32
4.8	0.203333	0.403333	0.69	-0.00333			-1.21	-0.75667	0.21	0.086667	-0.02	0.283333
4.81667	0.073333	0.386667	0.76	-0.00667			-1.24	-0.71667	0.293333	0.136667	-0.03	0.26
4.83333	0.03	0.373333	0.933333	0.113333			-1.25	-0.7	0.283333	0.226667	-0.02667	0.28
4.85	0.013333	0.37	1.1	0.153333			-1.24	-0.69	0.193333	0.28	-0.04333	0.33
4.86667	0.05	0.383333	1.07667	0.176667			-1.20333	-0.68	0.043333	0.333333	-0.02667	0.366667
4.88333	0.083333	0.363333	0.883333	0.21			-1.21667	-0.78667	-0.06	0.336667	0.016667	0.366667
4.9	0.153333	0.343333	0.56	0.193333			-1.22333	-0.88667	-0.10333	0.296667	0.01	0.33
4.91667	0.096667	0.313333	0.39	0.17			-1.23333	-0.85333	-0.15667	0.216667	-0.01667	0.323333
4.93333	0.103333	0.276667	0.436667	0.2			-1.28	-0.67667	-0.17333	0.19	0.083333	0.3
4.95	0.143333	0.306667	0.5	0.24			-1.27667	-0.62333	-0.21	0.17	0.223333	0.29
4.96667	0.166667	0.383333	0.516667	0.226667			-1.24333	-0.61333	-0.21	0.216667	0.236667	0.29
4.98333	0.22	0.4	0.606667	0.153333			-1.20667	-0.60667	-0.22	0.27	0.21	0.28
5	0.38	0.41	0.593333	-0.14333			-1.16	-0.59333	-0.21667	0.303333	0.183333	0.276667
5.01667	0.446667	0.413333	0.603333	-0.31333			-1.13	-0.59	-0.19	0.28	0.166667	0.283333
5.03333	0.446667	0.51	0.673333	-0.37333			-1.13333	-0.61333	-0.18667	0.24	0.156667	0.283333
5.05	0.473333	0.576667	0.69	-0.31333			-0.99333	-0.57333	-0.17	0.236667	0.173333	0.28
5.06667	0.456667	0.58	0.68	-0.28667			-0.88333	-0.56667	-0.12667	0.17	0.23	0.296667
5.08333	0.296667	0.53	0.66	-0.36333			-0.65333	-0.46	-0.1	0.196667	0.323333	0.296667
5.1	0.233333	0.423333	0.616667	-0.44667			-0.55	-0.46333	-0.1	0.236667	0.373333	0.286667
5.11667	0.31	0.383333	0.6	-0.58333			-0.53333	-0.50667	-0.2	0.183333	0.403333	0.276667
5.13333	0.413333	0.436667	0.616667	-0.71667			-0.47667	-0.45667	-0.21	0.146667	0.403333	0.28
5.15	0.433333	0.576667	0.593333	-0.81333			-0.43	-0.41	-0.18333	0.133333	0.4	0.283333
5.16667	0.51	0.616667	0.603333	-0.63333			-0.44667	-0.40667	-0.14	0.103333	0.38	0.253333
5.18333	0.536667	0.553333	0.616667	-0.43333			-0.45667	-0.39333	-0.11	0.13	0.376667	0.24
5.2	0.493333	0.576667	0.593333	-0.34333			-0.39333	-0.38333	-0.05333	0.123333	0.383333	0.223333
5.21667	0.383333	0.6	0.56	-0.29667			-0.34667	-0.32	0.003333	0.146667	0.38	0.2
5.23333	0.356667	0.47	0.556667	-0.31333			-0.34	-0.23667	0.04	0.183333	0.316667	0.196667
5.25	0.423333	0.433333	0.563333	-0.3			-0.38333	-0.34333	0.136667	0.153333	0.243333	0.17
5.26667	0.28	0.463333	0.576667	-0.24667			-0.38667	-0.29667	0.203333	0.093333	0.203333	0.15
5.28333	0.136667	0.473333	0.59	-0.20667			-0.30333	-0.25333	0.22	-0.04667	0.186667	0.14
5.3	0.093333	0.51	0.603333	-0.25333			-0.18	-0.28667	0.243333	-0.1	0.25	0.136667
5.31667	0.106667	0.563333	0.606667	-0.31			-0.10667	-0.47	0.283333	-0.13	0.37	0.103333
5.33333	0.136667	0.576667	0.613333	-0.36			-0.03	-0.67333	0.293333	-0.13333	0.43	0.086667
5.35	0.133333	0.58	0.62	-0.42			-0.00667	-0.74333	0.293333	-0.06333	0.476667	0.106667
5.36667	0.2	0.596667	0.606667	-0.45667			0.036667	-0.76333	0.276667	0.1	0.496667	0.146667
5.38333	0.233333	0.593333	0.593333	-0.47			0.083333	-0.73333	0.206667	0.206667	0.52	0.133333
5.4	0.093333	0.563333	0.576667	-0.57667			0.09	-0.59333	0.176667	0.34	0.566667	0.12
5.41667	0.013333	0.483333	0.55	-0.78667			0.053333	-0.61667	0.173333	0.436667	0.61	0.096667
5.43333	0.02	0.366667	0.526667	-0.83333			0.116667	-0.59	0.146667	0.463333	0.596667	0.086667
5.45	0.01	0.35	0.496667	-0.82			0.066667	-0.47	0.103333	0.493333	0.583333	0.05
5.46667	-0.06	0.433333	0.493333	-0.74667			0.02	-0.44	0.033333	0.54	0.613333	0.013333
5.48333	-0.07	0.553333	0.523333	-0.63			0	-0.54667	0.016667	0.286667	0.63	-0.04
5.5	-0.06	0.663333	0.603333	-0.55333			-0.00667	-0.59	0.03	0.281667	0.616667	-0.05
5.51667	-0.06333	0.74	0.603333	-0.47667			-0.02333	-0.44333	0.023333	0.241667	0.563333	-0.03667
5.53333	-0.06	0.806667	0.61	-0.43333			-0.04333	-0.49667	0.01	0.265	0.576667	-0.06
5.55	0.01	0.793333	0.636667	-0.39			-0.06667	-0.60667	0.043333	0.303333	0.586667	-0.12667
5.56667	0.043333	0.77	0.646667	-0.32333			-0.12	-0.68333	0.08	0.298333	0.593333	-0.15667
5.58333	0.136667	0.776667	0.643333	-0.28667			-0.17	-0.82	0.17	0.453333	0.573333	-0.15333
5.6	0.176667	0.803333	0.63	-0.23333			-0.2	-0.92333	0.2	0.44	0.56	-0.12667
5.61667	0.126667	0.76	0.62	-0.16			-0.21667	-0.96	0.26	0.43	0.62	-0.12
5.63333	0.073333	0.62	0.656667	-0.24333			-0.27667	-1.01	0.323333	0.39	0.673333	-0.12
5.65	0.073333	0.633333	0.756667	-0.25333			-0.29667	-1.00667	0.306667	0.38	0.796667	-0.1
5.66667	0.176667	0.633333	0.803333	-0.03667			-0.26	-1	0.3	0.383333	0.823333	-0.07667
5.68333	0.256667	0.616667	0.82	-0.09667			-0.29	-1.07667	0.343333	0.396667	0.79	0.053333
5.7	0.283333	0.59	0.82	-0.29			-0.39	-1.24333	0.343333	0.423333	0.753333	0.116667
5.71667	0.27	0.526667	0.813333	-0.36			-0.37	-1.28	0.333333	0.406667	0.76	0.15
5.73333	0.253333	0.45	0.706667	-0.31			-0.37333	-1.27333	0.283333	0.446667	0.7	0.143333
5.75	0.246667	0.406667	0.643333	-0.09667			-0.38	-1.26667	0.2	0.453333	0.626667	0.136667
5.76667	0.263333	0.456667	0.61	-0.02333			-0.41333	-1.25	0.173333	0.496667	0.553333	0.146667
5.78333	0.31	0.433333	0.59	0.093333			-0.39333	-1.22333	0.126667	0.553333	0.463333	0.166667
5.8	0.353333	0.356667	0.573333	0			-0.34667	-1.2	0.053333	0.56	0.433333	0.19
5.81667	0.383333	0.483333	0.576667	-0.13			-0.31333	-1.01	0.06	0.57	0.406667	0.196667
5.83333	0.403333	0.533333	0.593333	-0.37667			-0.3	-0.90667	0.096667	0.626667	0.39	0.28
5.85	0.44	0.486667	0.616667	-0.5			-0.28	-0.84667	0.14	0.6	0.43	0.353333
5.86667	0.483333	0.44	0.63	-0.56333			-0.25667	-0.82333	0.293333	0.543333	0.55	0.396667
5.88333	0.506667	0.376667	0.643333	-0.67667			-0.27333	-0.79	0.43	0.576667	0.593333	0.41
5.9	0.513333	0.356667	0.66	-0.61			-0.29667	-0.81	0.433333	0.55	0.633333	0.383333
5.91667	0.53	0.36	0.67	-0.59333			-0.28333	-0.82	0.42	0.523333	0.69	0.46
5.93333	0.546667	0.393333	0.656667	-0.61			-0.30333	-0.78333	0.436667	0.45	0.686667	0.633333
5.95	0.553333	0.463333	0.643333	-0.59667			-0.36	-0.79333	0.493333	0.42	0.676667	0.726667
5.96667	0.51	0.526667	0.64	-0.51667			-0.35	-0.79	0.52	0.42	0.67	0.596667
5.98333	0.48	0.566667	0.61	-0.55667			-0.36333	-0.74667	0.54	0.473333	0.663333	0.466667
6	0.473333	0.583333	0.56	-0.49333			-0.31333	-0.74	0.503333	0.616667	0.643333	0.43

## Sheet: PirtCre AMG517
Time	Trpv1fl/fl	Trpv1fl/fl	Trpv1fl/fl	Trpv1fl/fl	Trpv1fl/fl	Trpv1fl/fl	Trpv1fl/fl	PirtCre;Trpv1fl/fl	PirtCre;Trpv1fl/fl	PirtCre;Trpv1fl/fl	PirtCre;Trpv1fl/fl	PirtCre;Trpv1fl/fl	PirtCre;Trpv1fl/fl	PirtCre;Trpv1fl/fl
	Q234	Q235	Q261	R274	S025			Q233	Q259	Q260	R275	R277	S023	S024
-1	0.591369	-0.39082	0.303989	-0.15776	0.268962			-0.86792	-0.82847	-0.21754	0.550656	-0.29984	-0.28279	-0.23874
-0.98333	0.504699	-0.37749	0.353989	-0.07443	0.265632			-0.86792	-0.80514	-0.14421	0.490656	-0.35317	-0.23612	-0.39541
-0.96667	0.438032	-0.35082	0.357322	-0.12109	0.278962			-0.81126	-0.7118	-0.33421	0.417323	-0.33984	-0.19945	-0.50541
-0.95	0.304699	-0.26415	0.317322	-0.26443	0.272292			-0.70126	-0.61514	-0.45754	0.343989	-0.2665	-0.16612	-0.68875
-0.93333	0.221366	-0.26082	0.300656	-0.24776	0.255632			-0.62459	-0.4918	-0.48754	0.337322	-0.22317	-0.26945	-0.78541
-0.91667	0.164699	-0.29415	0.290656	-0.20776	0.262292			-0.59126	-0.38514	-0.42421	0.250656	-0.27984	-0.30612	-0.63541
-0.9	0.128032	-0.29749	0.293989	-0.34109	0.198962			-0.58126	-0.32847	-0.32087	0.213989	-0.4065	-0.26279	-0.43874
-0.88333	0.081366	-0.29749	0.297322	-0.47109	0.132292			-0.58459	-0.3618	-0.13754	0.260656	-0.4665	-0.16612	-0.32541
-0.86667	0.181366	-0.24082	0.327322	-0.57776	0.348962			-0.60792	-0.39514	-0.15754	0.223989	-0.36984	-0.15945	-0.16541
-0.85	0.208032	-0.14415	0.330656	-0.61109	0.312292			-0.63792	-0.4318	-0.24087	0.140656	-0.3965	-0.15279	-0.07541
-0.83333	0.234699	-0.09749	0.287322	-0.61776	0.235632			-0.61792	-0.47847	-0.31087	0.033989	-0.4465	-0.16279	0.007923
-0.81667	0.288032	-0.05415	0.247322	-0.62109	0.088962			-0.58792	-0.53847	-0.45087	-0.11268	-0.41984	-0.17945	0.02459
-0.8	0.271366	-0.01415	0.217322	-0.64776	-0.10771			-0.59792	-0.53514	-0.49421	-0.18601	-0.45317	-0.19612	0.187923
-0.78333	0.231366	0.042514	0.180656	-0.63443	0.012292			-0.58459	-0.52514	-0.52754	-0.24601	-0.4665	-0.20612	0.21459
-0.76667	0.234699	0.095847	0.127322	-0.44443	0.175632			-0.53126	-0.5218	-0.54421	-0.32268	-0.38984	-0.18279	0.18459
-0.75	0.254699	0.069181	0.097322	-0.41776	0.158962			-0.44459	-0.4918	-0.52087	-0.36268	-0.2765	-0.16279	0.267923
-0.73333	0.334699	0.029181	0.077322	-0.37443	0.225632			-0.31126	-0.4618	-0.51754	-0.35601	-0.19317	-0.21945	0.301257
-0.71667	0.334699	0.009181	0.060656	-0.32776	0.172292			-0.21459	-0.4318	-0.46754	-0.38601	-0.20317	-0.18945	0.207923
-0.7	0.134699	-0.00749	0.020656	-0.28443	0.048962			-0.16126	-0.4318	-0.46421	-0.41268	-0.20317	-0.16279	0.06459
-0.68333	0.104699	-0.12749	-0.00601	-0.26776	-0.01771			-0.14126	-0.41847	-0.54421	-0.43268	-0.14317	-0.13612	0.017923
-0.66667	0.128032	-0.48415	-0.00268	-0.23443	-0.06771			-0.12126	-0.4218	-0.55421	-0.35934	-0.0365	-0.11279	-0.03874
-0.65	0.074699	-0.58415	-0.05934	-0.23443	-0.10437			-0.01459	-0.4218	-0.53754	-0.30268	0.026831	-0.12612	-0.14874
-0.63333	-0.0353	-0.61749	-0.10601	-0.24776	-0.06437			0.108743	-0.41847	-0.50087	-0.21601	0.063497	-0.16279	-0.21874
-0.61667	-0.0553	-0.61749	-0.12601	-0.23443	-0.11437			0.168743	-0.39847	-0.56754	-0.08601	0.116831	-0.23612	-0.22874
-0.6	-0.0353	-0.52415	-0.13601	-0.23109	-0.19437			0.235409	-0.38514	-0.47421	-0.03268	0.163497	-0.22279	-0.26874
-0.58333	-0.0353	-0.51749	-0.10601	-0.19109	-0.24104			0.255409	-0.3218	-0.20087	0.120656	0.196831	-0.18612	-0.28541
-0.56667	-0.1453	-0.51749	-0.03934	0.095573	-0.25437			0.275409	-0.3018	-0.25421	0.227322	0.203497	-0.13945	-0.29541
-0.55	-0.20863	-0.49082	-0.04934	0.238907	-0.17771			0.295409	-0.26514	-0.50421	0.317322	0.230164	-0.07612	-0.27874
-0.53333	-0.17863	-0.45082	-0.04601	0.345574	-0.27104			0.315409	-0.21514	-0.52421	0.357322	0.280164	-0.03279	-0.10208
-0.51667	-0.1653	-0.41749	-0.06601	0.415574	-0.33771			0.318743	-0.1718	-0.43421	0.520656	0.330164	0.010547	0.11459
-0.5	-0.18863	-0.29749	-0.09268	0.27224	-0.20771			0.302076	-0.11514	-0.24087	0.693989	0.366831	0.047213	0.287923
-0.48333	-0.3453	-0.17749	-0.10601	0.198907	-0.16771			0.238743	-0.04847	-0.10087	0.737323	0.333497	0.10388	0.361257
-0.46667	-0.35863	-0.10749	-0.10601	0.178907	-0.25104			0.155409	-0.02847	0.009126	0.703989	0.286831	0.167213	0.37459
-0.45	-0.18197	-0.08415	-0.12268	0.168907	-0.39104			0.118743	0.041531	0.185793	0.740656	0.273497	0.130547	0.39459
-0.43333	-0.0253	-0.09749	-0.13601	0.18224	-0.35771			0.125409	0.071531	0.375793	0.710656	0.280164	0.11388	0.401257
-0.41667	-0.11197	-0.11749	-0.12934	0.115573	-0.18104			0.188743	0.061531	0.419126	0.643989	0.293497	0.130547	0.341257
-0.4	-0.17863	-0.12415	-0.04934	0.015573	-0.05104			0.185409	0.098197	0.422459	0.520656	0.303497	0.14388	0.157923
-0.38333	-0.30197	0.095847	-0.00934	0.068907	-0.01104			0.185409	0.144864	0.365793	0.493989	0.323497	0.12388	0.091256
-0.36667	-0.3253	0.235847	-0.01268	0.148907	0.002292			0.318743	0.204864	0.375793	0.573989	0.353497	0.080547	0.04459
-0.35	-0.2753	0.349181	-0.05268	0.205573	-0.01104			0.358743	0.214864	0.382459	0.610656	0.340164	0.07388	0.011256
-0.33333	-0.2853	0.395847	-0.09934	0.235573	0.025632			0.352076	0.204864	0.349126	0.660656	0.396831	0.10388	0.001256
-0.31667	-0.24863	0.432514	-0.17934	0.238907	0.035632			0.352076	0.258194	0.352459	0.693989	0.503497	0.14388	0.00459
-0.3	-0.21197	0.495844	-0.24601	0.205573	-0.03771			0.348743	0.304864	0.419126	0.637323	0.510164	0.100547	-0.03541
-0.28333	-0.10863	0.589184	-0.28601	0.21224	-0.18104			0.348743	0.324864	0.475793	0.520656	0.490164	-0.05279	-0.09208
-0.26667	0.024699	0.629184	-0.30934	0.175573	-0.18437			0.385409	0.378194	0.519126	0.440656	0.433497	0.00388	-0.09541
-0.25	0.068032	0.619184	-0.35934	0.14224	-0.18437			0.418743	0.428194	0.569126	0.347322	0.290164	0.120547	-0.06208
-0.23333	0.091366	0.542514	-0.32934	0.19224	-0.20771			0.418743	0.598194	0.609126	0.243989	0.176831	0.20388	-0.07541
-0.21667	0.058032	0.485844	-0.23268	0.218907	-0.33104			0.448743	0.681534	0.652459	0.123989	0.093497	0.307213	-0.04208
-0.2	0.018032	0.472514	-0.17268	0.255573	-0.41771			0.455409	0.701534	0.619126	-0.01934	0.066831	0.34388	0.021256
-0.18333	-0.09863	0.492514	-0.20601	0.25224	-0.31104			0.472076	0.701534	0.599126	-0.16268	0.036831	0.367213	0.11459
-0.16667	-0.13197	0.482514	-0.26268	0.285574	-0.27771			0.432076	0.674864	0.642459	-0.30268	0.006831	0.35388	0.18459
-0.15	-0.1553	0.445847	-0.35268	0.34224	-0.32104			0.278743	0.624864	0.659126	-0.42601	-0.00984	0.34388	0.20459
-0.13333	-0.1753	0.452514	-0.28268	0.49224	-0.22104			0.198743	0.678194	0.595793	-0.57601	-0.00984	0.28388	0.21459
-0.11667	-0.18197	0.399181	-0.20268	0.53224	0.075632			0.178743	0.684864	0.542459	-0.82934	-0.0465	0.297213	0.23459
-0.1	-0.17197	0.272514	-0.13601	0.43224	0.168962			0.215409	0.704864	0.465793	-1.07601	-0.1165	0.297213	0.237923
-0.08333	-0.15197	0.209181	-0.04601	0.355574	0.298962			0.268743	0.734864	0.382459	-1.19934	-0.14984	0.287213	0.211256
-0.06667	-0.1853	0.192514	-0.00601	0.368907	0.422292			0.292076	0.808194	0.339126	-1.22934	-0.15984	0.297213	0.18459
-0.05	-0.1753	0.219181	0.197322	0.35224	0.452292			0.288743	0.784864	0.289126	-1.25934	-0.1665	0.27388	0.16459
-0.03333	-0.15197	0.222514	0.250656	0.34224	0.385632			0.285409	0.871534	0.285793	-1.31934	-0.15984	0.170547	0.17459
-0.01667	-0.07863	0.165847	0.253989	0.36224	0.355632			0.325409	0.878194	0.365793	-1.32267	-0.16984	0.030547	0.24459
0	-0.0453	0.302514	0.077322	0.438907	0.318962			0.288743	0.838194	0.389126	-1.36934	-0.14984	-0.10945	0.26459
0.016667	0.111366	0.425847	0.037322	0.37224	0.308962			0.208743	0.801534	0.329126	-1.37267	-0.11984	-0.20945	0.24459
0.033333	-0.06197	0.432514	0.043989	0.16224	0.318962			0.098743	0.598194	0.195793	-1.30267	-0.1065	-0.15279	0.161256
0.05	0.298032	0.499184	0.040656	-0.00443	0.305632			0.022076	0.438194	0.225793	-1.33601	-0.07317	-0.05945	0.127923
0.066667	0.204699	0.592514	0.100656	0.06224	0.335632			-0.36459	0.381534	0.352459	-1.22267	-0.02317	0.120547	0.357923
0.083333	0.144699	0.782514	0.133989	-0.01109	0.295632			-0.32792	0.338194	0.265793	-1.62601	-0.07984	0.177213	0.191256
0.1	0.171366	0.315847	0.430656	-0.03443	0.198962			-0.34459	0.398194	0.339126	-0.96934	-0.1865	0.060547	0.147923
0.116667	-0.2153	-0.12415	0.153989	-0.09776	0.018962			-0.28126	0.608194	0.429126	-0.79934	0.103497	-0.01612	0.15459
0.133333	-0.25197	0.015847	0.210656	-0.12776	0.082292			-0.30459	0.974864	0.249126	-0.68601	0.210164	-0.25945	-0.02541
0.15	-0.12197	0.319181	0.347322	-0.22776	0.322292			-0.59792	1.01819	0.332459	-0.60268	-0.08317	-0.29612	-0.08874
0.166667	0.064699	0.702514	0.480656	-0.17443	0.448962			-0.71126	0.871534	0.672459	-0.59934	-0.3265	-0.46945	-0.02208
0.183333	0.241366	0.815844	0.557322	-0.10443	0.442292			-0.72459	0.718194	0.695793	-0.43268	-0.43984	-0.51279	-0.08208
0.2	0.318032	0.789184	0.563989	0.165573	0.445632			-0.58126	0.618194	0.525793	-0.24601	-0.42984	-0.43612	-0.09541
0.216667	0.311366	0.852514	0.490656	0.158907	0.585632			-0.36459	0.638194	0.635793	-0.14268	-0.4265	-0.20612	-0.09874
0.233333	0.274699	0.952514	0.303989	0.34224	0.372292			-0.39459	0.798194	0.659126	-0.01601	-0.49984	-0.10612	0.037923
0.25	0.308032	0.819184	0.137322	0.775573	0.178962			-0.36459	0.948194	0.435793	0.050656	-0.57984	-0.15279	0.15459
0.266667	0.431366	0.779184	0.350656	0.67224	0.102292			-0.15459	0.954864	-0.01087	0.037323	-0.67317	-0.22612	0.221256
0.283333	0.481366	0.799184	0.653989	0.388907	-0.15437			-0.04126	0.798194	0.099126	0.020656	-0.6465	-0.16279	0.181256
0.3	0.424699	1.03584	0.943989	0.288907	-0.25771			-0.05459	0.791534	0.229126	0.063989	-0.67984	-0.10279	0.141256
0.316667	0.461366	1.22584	0.970656	0.528907	-0.39437			-0.09459	0.831534	0.395793	0.123989	-0.67984	-0.19945	0.19459
0.333333	0.541366	1.28918	0.863989	0.605573	-0.57104			-0.15459	0.818194	0.499126	0.160656	-0.67317	-0.25279	0.241256
0.35	0.554699	1.21584	0.807322	0.418907	-0.62104			-0.25459	0.754864	0.552459	0.267322	-0.7065	-0.19612	0.137923
0.366667	0.524699	0.999184	0.757322	0.308907	-0.67771			-0.25792	0.621534	0.649126	0.373989	-0.6265	-0.20279	-0.02874
0.383333	0.531366	0.879184	0.600656	0.308907	-0.66771			-0.12792	0.484864	0.715793	0.323989	-0.64317	-0.13945	0.02459
0.4	0.534699	0.865844	0.420656	0.135573	-0.49437			-0.13126	0.324864	0.695793	0.337322	-0.81984	-0.09945	0.157923
0.416667	0.541366	0.955844	0.397322	0.08224	-0.31771			-0.08792	0.111531	0.575793	0.393989	-0.8965	0.007213	0.217923
0.433333	0.608029	0.975844	0.417322	0.175573	-0.21104			-0.08459	-0.16847	0.465793	0.300656	-0.80984	0.230547	0.16459
0.45	0.701369	0.829184	0.590656	0.278907	-0.23771			-0.04459	-0.35847	0.472459	0.277322	-0.60317	0.42388	0.087923
0.466667	0.834699	0.712514	0.723989	0.215573	-0.14771			0.035409	-0.37847	0.475793	0.260656	-0.44317	0.50721	0.071256
0.483333	0.918029	0.769184	0.783989	0.19224	-0.30437			0.082076	-0.43514	0.482459	0.133989	-0.37317	0.450547	0.307923
0.5	1.12137	0.769184	0.927322	0.045573	-0.34104			0.042076	-0.4818	0.422459	0.073989	-0.3165	0.35388	0.40459
0.516667	1.12137	0.705844	1.04399	0.00224	-0.32104			-0.04459	-0.50847	0.192459	0.027323	-0.34317	0.357213	0.391257
0.533333	0.704699	0.635844	0.977322	0.23224	-0.27437			-0.13459	-0.61847	0.059126	-0.07601	-0.37317	0.220547	0.371257
0.55	0.481366	0.609184	0.943989	0.285574	-0.29771			-0.19126	-0.7118	0.079126	-0.09268	-0.38317	0.09388	0.267923
0.566667	0.414699	0.422514	0.900656	0.22224	-0.28437			-0.25792	-0.70514	0.172459	-0.08268	-0.38317	0.090547	0.28459
0.583333	0.388032	0.302514	0.927322	0.298907	-0.27437			-0.35792	-0.7218	0.155792	-0.06601	-0.42984	0.087213	0.391257
0.6	0.394699	0.205847	0.840656	0.465573	-0.22437			-0.42126	-0.79847	0.049126	-0.01934	-0.4065	0.00388	0.45459
0.616667	0.288032	0.119181	0.753989	0.895573	-0.08771			-0.38792	-0.82514	0.015792	0.000656	-0.49984	-0.05612	0.48459
0.633333	0.051366	0.169181	0.760656	1.04891	-0.07437			-0.41126	-0.68847	0.049126	-0.04934	-0.72317	0.007213	0.47459
0.65	0.018032	0.142514	0.693989	1.12891	-0.16104			-0.36126	-0.68514	0.139126	-0.12934	-0.79317	0.007213	0.457923
0.666667	0.174699	0.115847	0.623989	1.07891	-0.21437			-0.30459	-0.85514	0.179126	-0.06268	-0.75317	-0.00612	0.46459
0.683333	0.291366	0.109181	0.573989	0.975573	-0.17104			-0.29792	-0.9218	0.282459	-0.06934	-0.60317	-0.02945	0.53459
0.7	0.451366	0.102514	0.560656	0.66224	-0.20771			-0.27459	-0.7418	0.389126	-0.07934	-0.5965	0.007213	0.611256
0.716667	0.661369	0.129181	0.547322	0.345574	-0.36771			-0.25126	-0.68847	0.322459	-0.06601	-0.56317	0.00388	0.51459
0.733333	0.774699	0.065847	0.503989	0.545573	-0.51104			-0.18792	-0.74847	0.069126	-0.05934	-0.53317	-0.04612	0.37459
0.75	0.808029	0.019181	0.490656	0.795573	-0.56437			-0.10459	-0.74847	-0.11421	-0.02268	-0.4865	-0.11945	0.341257
0.766667	0.758029	0.095847	0.500656	0.905573	-0.39104			-0.04126	-0.61514	-0.08421	-0.01934	-0.39317	-0.19945	0.30459
0.783333	0.598029	0.269181	0.583989	0.86224	-0.24104			-0.02459	-0.39514	0.045792	-0.09601	-0.42984	-0.26945	0.33459
0.8	0.564699	0.312514	0.717322	0.81224	-0.21437			-0.02126	-0.32847	0.135792	-0.18934	-0.51317	-0.37945	0.527923
0.816667	0.538032	0.279181	0.670656	0.705573	-0.11104			-0.04459	-0.37514	0.205793	-0.29934	-0.53984	-0.40945	0.49459
0.833333	0.421366	0.302514	0.670656	0.64224	0.042292			-0.07126	-0.47514	0.339126	-0.39268	-0.4665	-0.43612	0.411257
0.85	0.331366	0.359181	0.733989	0.66224	-0.01771			-0.10126	-0.49847	0.462459	-0.39601	-0.4465	-0.46612	0.377923
0.866667	0.261366	0.402514	0.707322	0.648907	-0.06104			-0.15126	-0.48514	0.379126	-0.39934	-0.41317	-0.47279	0.371257
0.883333	0.191366	0.345847	0.710656	0.73224	0.022292			-0.26126	-0.46847	0.259126	-0.46601	-0.3565	-0.44945	0.31459
0.9	0.164699	0.329181	0.727322	0.815573	0.105632			-0.30459	-0.44847	0.189126	-0.55934	-0.25317	-0.44279	0.28459
0.916667	0.178032	0.372514	0.760656	0.798907	0.238962			-0.29459	-0.4318	0.135792	-0.58268	-0.16317	-0.43612	0.32459
0.933333	0.254699	0.392514	0.873989	0.768907	0.282292			-0.37126	-0.42847	0.072459	-0.47934	-0.13984	-0.41612	0.361257
0.95	0.268032	0.422514	0.890656	0.74224	0.278962			-0.40792	-0.4118	0.052459	-0.42268	-0.1365	-0.41612	0.411257
0.966667	0.261366	0.452514	0.843989	0.738907	0.188962			-0.45126	-0.55514	0.025792	-0.40934	-0.13984	-0.40612	0.431257
0.983333	0.291366	0.552514	0.817322	0.718907	0.108962			-0.44459	-0.5918	-0.03087	-0.40268	-0.12317	-0.34279	0.40459
1	0.268032	0.605844	0.857322	0.705573	0.052292			-0.39459	-0.61847	-0.06087	-0.39934	-0.16317	-0.29945	0.39459
1.01667	0.191366	0.609184	0.953989	0.70224	-0.13771			-0.36792	-0.64514	-0.09754	-0.45268	-0.2265	-0.38612	0.351257
1.03333	0.144699	0.575844	1.03399	0.715573	-0.13437			-0.32126	-0.59847	-0.12087	-0.46268	-0.2365	-0.45279	0.33459
1.05	0.138032	0.572514	1.18066	0.705573	-0.00771			-0.26459	-0.52847	-0.09087	-0.47601	-0.22984	-0.48945	0.357923
1.06667	0.111366	0.619184	1.32066	0.71224	-0.01771			-0.30126	-0.4618	-0.10087	-0.48601	-0.2565	-0.46945	0.35459
1.08333	0.114699	0.562514	1.40399	0.728907	0.025632			-0.34459	-0.40847	-0.12421	-0.44601	-0.3765	-0.45945	0.34459
1.1	0.114699	0.479181	1.42066	0.645573	0.028962			-0.38459	-0.47847	-0.13421	-0.51268	-0.3665	-0.46945	0.337923
1.11667	0.114699	0.485844	1.41399	0.618907	0.032292			-0.35126	-0.45847	-0.13421	-0.69268	-0.31984	-0.50279	0.317923
1.13333	0.091366	0.515844	1.49066	0.645573	-0.00771			-0.26459	-0.4418	-0.12754	-0.79934	-0.3065	-0.52945	0.28459
1.15	0.064699	0.535844	1.62732	0.698907	-0.24771			-0.27459	-0.45514	-0.17087	-0.84267	-0.12984	-0.54279	0.271256
1.16667	0.074699	0.539184	1.65066	0.715573	-0.22104			-0.24792	-0.4618	-0.10754	-0.84934	-0.00984	-0.57612	0.257923
1.18333	0.078032	0.492514	1.69399	0.725573	0.075632			-0.17126	-0.54514	0.025792	-0.78934	0.036831	-0.69279	0.24459
1.2	0.071366	0.429181	1.68732	0.75224	0.208962			-0.13459	-0.57514	0.159126	-0.72268	0.013497	-0.76279	0.261256
1.21667	0.038032	0.399181	1.66066	0.818907	0.068962			-0.12792	-0.60847	0.112459	-0.70934	0.030164	-0.77612	0.32459
1.23333	0.081366	0.372514	1.64732	0.885573	-0.11104			-0.13792	-0.66514	0.132459	-0.68601	0.080164	-0.78279	0.357923
1.25	0.224699	0.345847	1.58399	0.948907	0.122292			-0.15792	-0.68847	0.115792	-0.62601	0.126831	-0.78612	0.367923
1.26667	0.254699	0.319181	1.55732	0.985573	0.295632			-0.20792	-0.66847	0.059126	-0.58268	0.216831	-0.79279	0.367923
1.28333	0.274699	0.305847	1.52732	0.995573	0.305632			-0.21792	-0.64514	-0.01421	-0.61601	0.156831	-0.80612	0.361257
1.3	0.274699	0.305847	1.49732	0.928907	0.288962			-0.17792	-0.6018	-0.19087	-0.65601	0.060164	-0.80612	0.361257
1.31667	0.271366	0.285847	1.51066	0.835573	0.145632			-0.13792	-0.49847	-0.19421	-0.61268	0.086831	-0.82612	0.371257
1.33333	0.264699	0.265847	1.54399	0.765573	0.115632			-0.16126	-0.42847	-0.14421	-0.57934	0.130164	-0.83279	0.461257
1.35	0.261366	0.259181	1.51066	0.745573	0.158962			-0.21126	-0.4618	-0.11421	-0.51601	0.113497	-0.82279	0.51459
1.36667	0.278032	0.289181	1.43066	0.75224	0.122292			-0.06459	-0.4318	-0.10754	-0.55601	0.140164	-0.81612	0.571256
1.38333	0.278032	0.369181	1.36732	0.75224	0.122292			0.128743	-0.38847	-0.10421	-0.61934	0.140164	-0.70945	0.58459
1.4	0.251366	0.649184	1.39732	0.77224	0.212292			0.102076	-0.34847	-0.03754	-0.59601	0.093497	-0.62279	0.567923
1.41667	0.228032	0.775844	1.45399	0.775573	0.258962			0.018743	-0.37514	-0.04754	-0.53934	0.036831	-0.60945	0.591256
1.43333	0.208032	0.799184	1.45066	0.688907	0.302292			-0.00792	-0.4618	-0.02754	-0.49268	-0.00317	-0.57945	0.627923
1.45	0.254699	0.799184	1.46399	0.64224	0.318962			0.005409	-0.5318	0.042459	-0.45268	-0.03317	-0.54612	0.657923
1.46667	0.324699	0.802514	1.41732	0.60224	0.335632			0.058743	-0.59514	0.052459	-0.39934	-0.05317	-0.52612	0.701256
1.48333	0.504699	0.822514	1.35399	0.64224	0.365632			0.085409	-0.64847	0.035792	-0.37934	-0.0465	-0.50279	0.737923
1.5	0.681369	0.849184	1.25732	0.69224	0.412292			0.015409	-0.69514	0.009126	-0.39268	-0.04317	-0.49612	0.747923
1.51667	0.784699	0.835844	1.17732	0.735573	0.415632			-0.02459	-0.74847	0.012459	-0.42934	-0.04984	-0.50612	0.747923
1.53333	0.771369	0.819184	1.11399	0.75224	0.405632			0.002076	-0.79514	0.059126	-0.38934	-0.04317	-0.49945	0.73459
1.55	0.591369	0.822514	1.08066	0.758907	0.435632			0.025409	-0.81847	0.092459	-0.36268	-0.02984	-0.43612	0.737923
1.56667	0.208032	0.809184	1.02066	0.70224	0.418962			0.135409	-0.82514	0.055792	-0.29601	0.013497	-0.31945	0.721256
1.58333	0.114699	0.789184	0.903989	0.775573	0.425632			0.178743	-0.8018	0.015792	-0.25268	0.050164	-0.24279	0.687923
1.6	0.091366	0.772514	0.833989	0.805573	0.468962			0.172076	-0.7818	0.005792	-0.18268	0.106831	-0.16945	0.701256
1.61667	0.108032	0.735844	0.820656	0.848907	0.505632			0.135409	-0.76847	0.032459	-0.15268	0.123497	-0.13279	0.711256
1.63333	-0.0153	0.722514	0.830656	0.848907	0.545632			0.152076	-0.73847	-0.01754	-0.15268	0.126831	-0.10279	0.741256
1.65	-0.11863	0.769184	0.887322	0.80224	0.628962			0.215409	-0.7018	-0.14087	-0.12601	0.110164	-0.09612	0.73459
1.66667	-0.1253	0.849184	0.880656	0.735573	0.648962			0.245409	-0.6618	-0.16754	-0.08601	0.110164	-0.14612	0.711256
1.68333	-0.05197	0.842514	0.793989	0.765573	0.592292			0.258743	-0.61847	0.022459	-0.01934	0.116831	-0.22612	0.717923
1.7	0.094699	0.609184	0.783989	0.92224	0.495632			0.172076	-0.6018	0.142459	0.027323	0.130164	-0.25612	0.75459
1.71667	0.148032	0.645844	0.773989	0.995573	0.515632			0.138743	-0.60514	0.135792	0.107323	0.190164	-0.37612	0.747923
1.73333	0.218032	0.699184	0.783989	1.06891	0.565632			0.188743	-0.59514	0.159126	0.150656	0.240164	-0.48279	0.671256
1.75	0.168032	0.749184	0.797322	1.17557	0.572292			0.185409	-0.60514	0.152459	0.187322	0.243497	-0.53612	0.517923
1.76667	0.174699	0.505844	0.737322	1.21891	0.572292			0.195409	-0.6218	0.105792	0.173989	0.206831	-0.60279	0.47459
1.78333	0.414699	0.339181	0.667322	1.30891	0.642292			0.188743	-0.60847	0.055792	0.110656	0.223497	-0.65945	0.511256
1.8	0.564699	0.269181	0.570656	1.42224	0.652292			0.188743	-0.55514	-0.03087	0.157323	0.260164	-0.69279	0.52459
1.81667	0.538032	0.245847	0.573989	1.37224	0.662292			0.182076	-0.5718	-0.06087	0.200656	0.250164	-0.71279	0.491256
1.83333	0.424699	0.279181	0.557322	1.29891	0.662292			0.155409	-0.6218	-0.07421	0.180656	0.226831	-0.70279	0.49459
1.85	0.371366	0.359181	0.607322	1.36891	0.665632			0.178743	-0.63514	-0.08754	0.153989	0.230164	-0.69945	0.531256
1.86667	0.518032	0.459181	0.627322	1.44891	0.695632			0.165409	-0.60514	-0.07754	0.183989	0.330164	-0.65612	0.557923
1.88333	0.364699	0.525844	0.613989	1.40224	0.745632			0.222076	-0.6118	0.019126	0.223989	0.276831	-0.58612	0.547923
1.9	0.241366	0.599184	0.507322	1.30557	0.788962			0.278743	-0.57847	0.062459	0.290656	0.203497	-0.55279	0.47459
1.91667	0.214699	0.685844	0.473989	1.29224	0.792292			0.228743	-0.5018	0.112459	0.393989	0.250164	-0.54279	0.42459
1.93333	0.174699	0.732514	0.467322	1.13224	0.792292			0.138743	-0.47847	0.152459	0.463989	0.253497	-0.59612	0.42459
1.95	0.078032	0.722514	0.447322	1.12557	0.798962			0.102076	-0.45514	0.185793	0.487323	0.243497	-0.58612	0.44459
1.96667	0.091366	0.769184	0.413989	1.17891	0.768962			0.085409	-0.43514	0.245793	0.523989	0.223497	-0.56279	0.431257
1.98333	0.258032	0.812514	0.403989	1.28891	0.725632			0.108743	-0.4818	0.305793	0.557323	0.213497	-0.50612	0.41459
2	0.344699	0.869184	0.440656	1.23224	0.645632			0.115409	-0.54514	0.349126	0.613989	0.113497	-0.44945	0.40459
2.01667	0.354699	0.932514	0.487322	1.09557	0.658962			0.128743	-0.5618	0.369126	0.607323	-0.1165	-0.41279	0.401257
2.03333	0.194699	0.969184	0.527322	0.975573	0.655632			0.135409	-0.54847	0.392459	0.573989	-0.2265	-0.37945	0.387923
2.05	0.161366	0.969184	0.550656	1.02224	0.578962			0.138743	-0.58514	0.369126	0.507323	-0.27317	-0.36279	0.367923
2.06667	0.268032	0.972514	0.567322	1.04224	0.502292			0.115409	-0.66847	0.365793	0.540656	-0.23984	-0.35612	0.391257
2.08333	0.364699	0.982514	0.620656	1.06224	0.445632			0.038743	-0.7818	0.425793	0.597323	-0.23984	-0.31612	0.401257
2.1	0.438032	0.975844	0.650656	1.06224	0.398962			-0.03792	-0.85847	0.442459	0.637323	-0.2765	-0.21612	0.411257
2.11667	0.448032	0.882514	0.720656	1.09557	0.382292			-0.05792	-0.87847	0.379126	0.627323	-0.32317	-0.17612	0.39459
2.13333	0.421366	0.679184	0.763989	1.21224	0.412292			-0.11792	-0.89514	0.362459	0.583989	-0.33984	-0.15279	0.37459
2.15	0.274699	0.502514	0.797322	1.28224	0.392292			-0.12792	-0.88847	0.392459	0.680656	-0.34984	-0.14279	0.377923
2.16667	0.134699	0.362514	0.947322	1.26891	0.385632			-0.11459	-0.81514	0.452459	0.730656	-0.33984	-0.17612	0.477923
2.18333	0.088032	0.135847	1.15732	1.23557	0.408962			-0.11792	-0.80514	0.445793	0.670656	-0.28317	-0.21279	0.48459
2.2	0.084699	-0.00082	1.23732	1.20224	0.388962			-0.05126	-0.83514	0.445793	0.627323	-0.19317	-0.25612	0.421257
2.21667	0.104699	-0.09415	1.28066	1.16891	0.432292			0.012076	-0.87514	0.472459	0.560656	-0.19317	-0.28279	0.391257
2.23333	0.061366	-0.12415	1.29066	1.13557	0.425632			0.108743	-0.9518	0.592459	0.590656	-0.13317	-0.30612	0.371257
2.25	0.041366	-0.05749	1.28399	1.13891	0.318962			0.395409	-1.03847	0.609126	0.667323	-0.0565	-0.32945	0.371257
2.26667	0.071366	-0.01749	1.19732	1.09891	0.278962			0.515409	-1.1518	0.585793	0.680656	0.113497	-0.34612	0.38459
2.28333	0.001366	-0.07415	1.12399	1.02224	0.212292			0.608743	-1.20514	0.579126	0.610656	0.216831	-0.40612	0.417923
2.3	-0.0153	-0.12415	1.09732	0.908907	0.248962			0.668743	-1.1618	0.585793	0.583989	0.256831	-0.44945	0.447923
2.31667	0.024699	-0.10415	1.02399	0.788907	0.372292			0.628743	-1.07514	0.585793	0.547323	0.280164	-0.47279	0.43459
2.33333	0.051366	-0.08415	0.970656	0.80224	0.565632			0.548743	-0.96847	0.522459	0.473989	0.236831	-0.53279	0.357923
2.35	0.138032	-0.39749	1.13399	0.828907	0.582292			0.388743	-0.81847	0.409126	0.463989	0.196831	-0.60279	0.181256
2.36667	0.211366	-0.49082	1.28066	0.86224	0.535632			0.352076	-0.7018	0.365793	0.510656	0.253497	-0.66612	0.071256
2.38333	0.338032	-0.40415	1.35066	0.88224	0.622292			0.482076	-0.63514	0.252459	0.553989	0.300164	-0.68279	0.201256
2.4	0.398032	-0.40749	1.48399	0.908907	0.748962			0.545409	-0.5018	0.189126	0.567323	0.330164	-0.66279	0.377923
2.41667	0.431366	-0.43415	1.49399	0.918907	0.845632			0.602076	-0.37847	0.215793	0.607323	0.343497	-0.61945	0.417923
2.43333	0.434699	-0.47415	1.54066	0.985573	0.895632			0.518743	-0.25847	0.382459	0.580656	0.330164	-0.58612	0.417923
2.45	0.458032	-0.64082	1.58066	0.935573	0.855632			0.478743	-0.1318	0.435793	0.563989	0.320164	-0.55945	0.417923
2.46667	0.611369	-0.79415	1.54066	0.788907	0.795632			0.482076	-0.09514	0.392459	0.530656	0.360164	-0.52612	0.42459
2.48333	0.651369	-0.83415	1.54066	0.778907	0.768962			0.478743	-0.06847	0.115792	0.470656	0.393497	-0.51279	0.42459
2.5	0.564699	-0.84415	1.54066	0.818907	0.782292			0.318743	-0.17847	-0.06421	0.403989	0.430164	-0.55279	0.38459
2.51667	0.494699	-0.83749	1.58066	0.80224	0.778962			0.242076	-0.2418	-0.15421	0.390656	0.470164	-0.60279	0.44459
2.53333	0.444699	-0.64415	1.55066	0.78224	0.698962			0.175409	-0.22847	-0.14754	0.367322	0.436831	-0.63279	0.497923
2.55	0.424699	-0.53082	1.52732	0.825573	0.618962			0.095409	-0.1118	-0.24087	0.213989	0.353497	-0.65945	0.527923
2.56667	0.448032	-0.47415	1.49732	0.878907	0.475632			0.022076	-0.0318	-0.32087	0.160656	0.360164	-0.68279	0.581256
2.58333	0.451366	-0.39082	1.51732	0.888907	0.375632			-0.06459	-0.0618	-0.43421	0.137323	0.363497	-0.68279	0.607923
2.6	0.474699	-0.33415	1.53732	0.915573	0.335632			-0.13792	-0.08847	-0.46087	0.153989	0.340164	-0.67945	0.651256
2.61667	0.468032	-0.28749	1.54399	0.94224	0.318962			-0.16126	-0.1218	-0.38087	0.147323	0.283497	-0.63945	0.701256
2.63333	0.438032	-0.20082	1.57732	0.89224	0.315632			-0.16792	-0.16847	-0.28087	0.153989	0.186831	-0.61945	0.731256
2.65	0.408032	-0.11415	1.66066	0.91224	0.298962			-0.18126	-0.2218	-0.30754	0.163989	0.170164	-0.62612	0.771256
2.66667	0.341366	-0.08415	1.64399	0.92224	0.312292			-0.21792	-0.2818	-0.30754	0.113989	0.123497	-0.63612	0.787923
2.68333	0.294699	-0.07415	1.55066	0.90224	0.305632			-0.22792	-0.31847	-0.38087	0.150656	0.076831	-0.61945	0.757923
2.7	0.281366	-0.11082	1.47066	0.835573	0.285632			-0.23792	-0.3818	-0.38087	0.223989	0.016831	-0.63612	0.721256
2.71667	0.218032	-0.04749	1.37066	0.865573	0.262292			-0.27792	-0.42514	-0.22087	0.290656	0.023497	-0.65279	0.71459
2.73333	0.138032	0.015847	1.27066	0.915573	0.285632			-0.31126	-0.4318	-0.01754	0.357322	0.086831	-0.63945	0.701256
2.75	0.058032	0.145847	1.21732	0.90224	0.308962			-0.33126	-0.4918	0.122459	0.340656	0.093497	-0.68612	0.657923
2.76667	0.051366	0.249181	1.15399	0.78224	0.305632			-0.39459	-0.5218	0.095792	0.273989	0.016831	-0.72279	0.60459
2.78333	0.064699	0.302514	1.10732	0.77224	0.295632			-0.43126	-0.5718	0.022459	0.140656	-0.0465	-0.71945	0.57459
2.8	0.081366	0.309181	1.03066	0.765573	0.275632			-0.46792	-0.6218	-0.04087	0.040656	-0.1165	-0.69279	0.541256
2.81667	0.104699	0.262514	0.987322	0.695573	0.202292			-0.50459	-0.62847	-0.07087	0.000656	-0.18984	-0.65945	0.571256
2.83333	0.084699	0.232514	0.947322	0.66224	0.212292			-0.55792	-0.63514	-0.15087	-0.00934	-0.21984	-0.64279	0.587923
2.85	-0.01197	0.179181	0.927322	0.625573	0.268962			-0.60459	-0.65514	-0.15421	-0.03601	-0.18984	-0.63945	0.557923
2.86667	-0.06197	0.122514	0.913989	0.618907	0.278962			-0.64459	-0.5718	-0.18421	-0.09601	-0.1265	-0.64279	0.54459
2.88333	0.021366	0.069181	0.903989	0.678907	0.375632			-0.70126	-0.4818	-0.27754	-0.13268	-0.10317	-0.59279	0.551256
2.9	0.098032	0.029181	0.897322	0.655573	0.502292			-0.72792	-0.46847	-0.26754	-0.07268	-0.07317	-0.52279	0.537923
2.91667	0.081366	0.009181	0.897322	0.635573	0.558962			-0.72126	-0.4418	-0.22087	-0.00934	-0.0265	-0.46945	0.51459
2.93333	0.021366	-0.00415	0.897322	0.595573	0.588962			-0.64459	-0.44514	-0.15421	-0.03268	0.046831	-0.47612	0.497923
2.95	-0.0853	-0.01082	0.907322	0.558907	0.495632			-0.68792	-0.46514	-0.15087	-0.01601	0.073497	-0.56279	0.467923
2.96667	-0.2353	0.045847	0.897322	0.49224	0.395632			-0.64126	-0.52514	-0.21087	-0.02268	0.133497	-0.59945	0.437923
2.98333	-0.3253	0.082514	0.907322	0.395574	0.325632			-0.67126	-0.66847	-0.24754	-0.04934	0.213497	-0.61279	0.421257
3	-0.3453	0.095847	0.937322	0.325574	0.308962			-0.72792	-0.69847	-0.25754	-0.02601	0.166831	-0.64279	0.43459
3.01667	-0.3553	0.109181	0.927322	0.32224	0.272292			-0.55459	-0.69514	-0.27421	0.010656	0.050164	-0.66612	0.381257
3.03333	-0.3653	0.102514	0.917322	0.35224	0.228962			-0.58792	-0.68514	-0.27421	0.057323	-0.00984	-0.68612	0.297923
3.05	-0.3653	0.055847	0.833989	0.405574	0.222292			-0.53459	-0.75514	-0.27421	0.053989	-0.02317	-0.75945	0.291257
3.06667	-0.39863	0.005847	0.777322	0.445574	0.228962			-0.49459	-0.77847	-0.29421	0.017323	-0.0165	-0.78945	0.297923
3.08333	-0.40863	-0.01749	0.807322	0.418907	0.248962			-0.44459	-0.8418	-0.30087	-0.00934	-0.0665	-0.79612	0.337923
3.1	-0.3853	-0.05082	0.797322	0.438907	0.252292			-0.41126	-0.89847	-0.29754	0.017323	-0.12984	-0.79945	0.401257
3.11667	-0.24197	-0.10415	0.807322	0.488907	0.215632			-0.35792	-0.9518	-0.30754	0.083989	-0.1565	-0.79945	0.47459
3.13333	-0.19197	-0.13082	0.847322	0.578907	0.128962			-0.29792	-0.96514	-0.29421	0.113989	-0.16317	-0.82612	0.517923
3.15	-0.1453	-0.17415	0.830656	0.595573	0.062292			-0.27459	-0.9718	-0.24087	0.050656	-0.16984	-0.85612	0.501256
3.16667	-0.09197	-0.23082	0.780656	0.558907	0.075632			-0.21126	-1.04847	-0.21421	0.017323	-0.15984	-0.82612	0.557923
3.18333	-0.01197	-0.27082	0.683989	0.54224	0.102292			-0.17126	-1.04847	-0.23421	0.013989	-0.1365	-0.73612	0.691256
3.2	0.121366	-0.30749	0.630656	0.56224	0.098962			-0.21792	-1.04847	-0.21754	-0.05601	-0.10317	-0.63945	0.701256
3.21667	0.164699	-0.31749	0.777322	0.505573	0.115632			-0.24126	-1.05514	-0.21421	-0.13268	-0.0765	-0.59279	0.727923
3.23333	0.111366	-0.37415	0.827322	0.428907	0.105632			-0.22792	-1.04847	-0.20087	-0.16601	-0.08317	-0.58612	0.77459
3.25	-0.02863	-0.38415	0.547322	0.51224	0.052292			-0.28126	-0.99514	-0.08754	-0.21601	-0.10984	-0.56945	0.78459
3.26667	0.024699	-0.38415	0.313989	0.648907	0.015632			-0.33126	-0.94514	-0.05754	-0.26268	-0.11984	-0.56945	0.76459
3.28333	-0.1153	-0.37415	0.270656	0.678907	0.015632			-0.34126	-0.92847	-0.09421	-0.33268	-0.09984	-0.54279	0.821256
3.3	-0.1353	-0.45082	0.280656	0.64224	0.045632			-0.36792	-0.9318	-0.19087	-0.41601	-0.11317	-0.51279	0.847923
3.31667	-0.00197	-0.51415	0.287322	0.568907	0.025632			-0.36792	-0.95847	-0.29754	-0.42934	-0.21317	-0.51945	0.88459
3.33333	0.081366	-0.58749	0.293989	0.508907	-0.00437			-0.39792	-0.89847	-0.47087	-0.48934	-0.32317	-0.50945	0.937923
3.35	0.198032	-0.57415	0.307322	0.54224	-0.04104			-0.39792	-0.78514	-0.32087	-0.50268	-0.40317	-0.52945	1.02459
3.36667	0.274699	-0.51749	0.317322	0.56224	-0.03771			-0.32126	-0.75514	-0.22421	-0.45601	-0.44984	-0.54279	1.08459
3.38333	0.288032	-0.55082	0.330656	0.545573	-0.03104			-0.25792	-0.76847	-0.18421	-0.34601	-0.4365	-0.53279	1.16459
3.4	0.151366	-0.52749	0.307322	0.61224	-0.03771			-0.20126	-0.80847	-0.19087	-0.25934	-0.4665	-0.48612	1.19792
3.41667	0.084699	-0.54082	0.327322	0.67224	-0.05437			-0.11126	-0.8618	-0.22087	-0.18934	-0.54317	-0.41279	1.19126
3.43333	0.131366	-0.58749	0.353989	0.805573	-0.06771			-0.03126	-0.83514	-0.25421	-0.24601	-0.6065	-0.34945	1.12459
3.45	0.291366	-0.46415	0.460656	0.878907	-0.06104			0.118743	-0.82847	-0.29087	-0.19601	-0.61317	-0.33945	1.09459
3.46667	0.444699	-0.29749	0.540656	0.90224	-0.03437			0.145409	-1.02847	-0.34087	-0.02268	-0.64984	-0.35945	1.12792
3.48333	0.504699	-0.25082	0.580656	0.835573	-0.02771			0.178743	-1.08847	-0.43087	0.140656	-0.74984	-0.35945	1.11459
3.5	0.501366	-0.33415	0.593989	0.84224	0.002292			0.188743	-1.08847	-0.50754	0.190656	-0.82984	-0.34279	1.11126
3.51667	0.351366	-0.44415	0.610656	0.758907	0.045632			0.178743	-1.1118	-0.43754	0.263989	-0.8565	-0.31612	1.09126
3.53333	0.171366	-0.46749	0.637322	0.735573	0.148962			0.138743	-1.0718	-0.35754	0.353989	-0.88984	-0.32945	1.08792
3.55	0.088032	-0.75749	0.647322	0.825573	0.218962			0.112076	-0.95847	-0.33421	0.437323	-0.91317	-0.36612	1.09126
3.56667	0.084699	-0.78749	0.627322	0.86224	0.225632			0.078743	-0.84847	-0.20754	0.467323	-0.9565	-0.47612	1.08459
3.58333	0.064699	-0.59415	0.627322	0.785573	0.218962			0.065409	-0.84514	-0.18087	0.480656	-0.97984	-0.63279	1.07459
3.6	-0.0253	-0.42749	0.627322	0.738907	0.312292			0.042076	-0.85514	-0.15754	0.460656	-0.9765	-0.54279	1.06459
3.61667	0.104699	-0.29749	0.593989	0.675573	0.335632			-0.01126	-0.80847	-0.11421	0.443989	-0.96984	-0.47612	1.06126
3.63333	0.318032	-0.26415	0.593989	0.525573	0.218962			-0.01126	-0.73847	-0.07087	0.413989	-0.9465	-0.50279	1.02792
3.65	0.428032	-0.23082	0.590656	0.488907	0.165632			0.012076	-0.71847	-0.09087	0.437323	-0.8865	-0.47945	0.897923
3.66667	0.484699	-0.17082	0.587322	0.50224	0.138962			-0.00459	-0.73514	-0.25421	0.450656	-0.7765	-0.51279	0.761256
3.68333	0.664699	-0.12082	0.713989	0.388907	0.068962			0.005409	-0.7718	-0.30087	0.450656	-0.73984	-0.55279	0.747923
3.7	0.804699	-0.04082	0.843989	0.32224	0.072292			-0.02792	-0.79514	-0.20754	0.377323	-0.71984	-0.61279	0.871256
3.71667	0.818029	0.035847	0.947322	0.298907	0.142292			-0.07126	-0.80847	-0.04421	0.237322	-0.67984	-0.61279	0.88459
3.73333	0.718029	0.062514	1.00066	0.255573	0.178962			-0.09126	-0.81514	0.045792	0.073989	-0.66984	-0.61279	0.887923
3.75	0.664699	0.065847	1.04399	0.185573	0.225632			-0.13126	-0.8718	0.115792	-0.03601	-0.6465	-0.55612	0.877923
3.76667	0.614699	0.082514	1.07399	0.07224	0.158962			-0.17126	-0.9218	0.139126	-0.06934	-0.6265	-0.47612	0.85459
3.78333	0.654699	0.202514	1.08399	0.058907	0.065632			-0.22459	-0.9518	0.082459	-0.07934	-0.6565	-0.40945	0.84459
3.8	0.731369	0.412514	1.06732	0.205573	-0.02771			-0.17126	-1.0218	-0.07754	-0.06601	-0.68984	-0.34945	0.827923
3.81667	0.858029	0.429181	1.10066	0.348907	-0.10437			-0.14459	-1.0418	-0.10421	-0.03268	-0.71317	-0.33612	0.81459
3.83333	0.501366	0.452514	1.18399	0.35224	-0.22437			-0.04792	-1.0618	-0.04754	0.007323	-0.8065	-0.28612	0.79459
3.85	0.251366	0.449181	1.24399	0.188907	-0.19104			-0.02126	-1.0918	0.089126	0.103989	-0.88317	-0.20279	0.767923
3.86667	0.144699	0.405847	1.33399	0.18224	-0.00104			-0.02792	-1.08847	0.179126	0.170656	-0.85984	-0.05279	0.717923
3.88333	0.081366	0.475847	1.41732	0.45224	-0.04771			-0.19792	-1.0218	0.249126	0.167323	-0.7865	0.010547	0.67459
3.9	-0.0653	0.539184	1.46066	0.378907	-0.20104			-0.20126	-0.97847	0.409126	0.133989	-0.78984	-0.00945	0.667923
3.91667	-0.1953	0.562514	1.45732	0.33224	-0.35437			-0.12459	-1.0018	0.489126	0.047323	-0.6965	-0.10945	0.66459
3.93333	-0.2253	0.742514	1.44732	0.358907	-0.33104			-0.15792	-0.98847	0.419126	-0.02268	-0.58984	-0.15945	0.64459
3.95	-0.0853	0.855844	1.43066	0.328907	-0.17437			-0.23126	-0.96847	0.319126	-0.07934	-0.58317	-0.14612	0.621256
3.96667	0.058032	0.899184	1.31732	0.33224	-0.13771			-0.33126	-0.97514	0.379126	-0.06268	-0.5565	-0.19945	0.587923
3.98333	0.194699	0.962514	1.07399	0.35224	-0.17437			-0.31792	-0.98514	0.415793	-0.02934	-0.42317	-0.09945	0.567923
4	0.151366	0.992514	0.833989	0.36224	-0.23437			-0.24126	-0.98514	0.315793	-0.04934	-0.3265	0.020547	0.60459
4.01667	-0.0153	0.999184	0.970656	0.268907	-0.29437			-0.21126	-1.00514	0.335793	-0.09934	-0.19317	0.07388	0.651256
4.03333	-0.13863	0.975844	1.23066	0.355574	-0.25104			-0.27459	-1.05514	0.382459	-0.19268	-0.06317	0.087213	0.651256
4.05	-0.1653	0.865844	1.37066	0.458907	-0.23104			-0.15126	-1.0018	0.302459	-0.26268	0.103497	0.040547	0.621256
4.06667	-0.08863	0.709184	1.31732	0.518907	-0.24437			-0.07126	-0.93847	0.409126	-0.26934	0.233497	0.047213	0.62459
4.08333	0.108032	0.609184	1.22732	0.56224	-0.20437			-0.00792	-0.8518	0.462459	-0.28601	0.276831	0.117213	0.621256
4.1	0.124699	0.509184	1.19732	0.62224	-0.26437			-0.01459	-0.70514	0.412459	-0.29934	0.310164	0.250547	0.647923
4.11667	-0.04863	0.472514	1.23066	0.758907	-0.43437			-0.02792	-0.60514	0.382459	-0.27268	0.353497	0.26388	0.661256
4.13333	-0.27197	0.522514	1.21732	0.828907	-0.57104			-0.11459	-0.58514	0.352459	-0.28268	0.390164	0.267213	0.64459
4.15	-0.34197	0.555844	1.14732	0.838907	-0.61771			-0.20459	-0.5818	0.412459	-0.32601	0.450164	0.23388	0.60459
4.16667	-0.24197	0.542514	1.07732	0.785573	-0.60437			-0.41792	-0.55847	0.419126	-0.36934	0.446831	0.16388	0.54459
4.18333	0.091366	0.599184	0.973989	0.695573	-0.55104			-0.55459	-0.49847	0.325793	-0.38601	0.403497	0.10388	0.531256
4.2	0.124699	0.709184	0.867322	0.635573	-0.54771			-0.67792	-0.45847	0.285793	-0.42934	0.366831	0.05388	0.52459
4.21667	-0.1753	0.729184	0.790656	0.528907	-0.51104			-0.73126	-0.42514	0.242459	-0.48601	0.303497	0.02388	0.51459
4.23333	-0.3753	0.732514	0.817322	0.515573	-0.47437			-0.78459	-0.42847	0.319126	-0.50601	0.273497	-0.05945	0.577923
4.25	-0.38863	0.715844	0.813989	0.658907	-0.45771			-0.78126	-0.43847	0.225793	-0.50268	0.286831	-0.07945	0.58459
4.26667	-0.2353	0.715844	0.697322	0.84224	-0.53437			-0.75792	-0.4918	0.052459	-0.56934	0.306831	-0.04612	0.567923
4.28333	-0.25197	0.669184	0.627322	0.80224	-0.63104			-0.75126	-0.50514	-0.01087	-0.73934	0.306831	-0.07945	0.51459
4.3	-0.41197	0.545844	0.580656	0.658907	-0.76437			-0.69792	-0.47514	-0.03421	-0.79267	0.376831	-0.12945	0.557923
4.31667	-0.47197	0.455847	0.513989	0.628907	-0.90437			-0.57126	-0.4418	-0.10087	-0.80934	0.406831	-0.14279	0.487923
4.33333	-0.5053	0.359181	0.467322	0.59224	-0.98104			-0.62792	-0.50514	-0.12421	-0.82601	0.413497	-0.14945	0.38459
4.35	-0.48197	0.425847	0.410656	0.51224	-1.03104			-0.91459	-0.59514	-0.09087	-0.78601	0.403497	-0.23279	0.321257
4.36667	-0.45197	0.549184	0.373989	0.67224	-1.10104			-1.10126	-0.67514	0.012459	-0.73267	0.420164	-0.42279	0.24459
4.38333	-0.43197	0.509184	0.370656	0.798907	-1.15104			-1.09126	-0.7518	0.019126	-0.77601	0.470164	-0.41612	0.247923
4.4	-0.36197	0.502514	0.360656	0.795573	-1.19437			-0.91459	-0.76514	-0.01754	-0.87601	0.463497	-0.32279	0.297923
4.41667	-0.22863	0.622514	0.333989	0.828907	-1.20771			-0.81459	-0.7618	-0.10754	-0.92934	0.473497	-0.27945	0.317923
4.43333	-0.17863	0.619184	0.290656	0.90224	-1.20104			-0.83792	-0.77847	-0.27421	-1.02601	0.453497	-0.27945	0.461257
4.45	-0.19197	0.595844	0.297322	1.02224	-1.1877			-0.90792	-0.7518	-0.34087	-1.07601	0.316831	-0.34945	0.41459
4.46667	-0.1653	0.589184	0.323989	1.05224	-1.16437			-0.91459	-0.6918	-0.29087	-1.08267	0.270164	-0.40279	0.317923
4.48333	-0.0953	0.532514	0.397322	1.12891	-1.16437			-0.91459	-0.66514	-0.28754	-1.11934	0.263497	-0.46945	0.327923
4.5	-0.08863	0.465847	0.500656	1.16557	-1.1677			-0.96459	-0.63847	-0.28421	-1.16601	0.233497	-0.52279	0.23459
4.51667	-0.0953	0.395847	0.557322	1.18224	-1.13104			-1.02792	-0.5518	-0.29421	-1.14934	0.220164	-0.61945	0.197923
4.53333	-0.1253	0.299181	0.567322	1.25557	-1.1177			-1.09459	-0.49514	-0.34421	-1.11601	0.206831	-0.74612	0.201256
4.55	-0.1453	0.295847	0.587322	1.40557	-1.16437			-1.15792	-0.4718	-0.36087	-1.10934	0.206831	-0.78612	0.21459
4.56667	-0.1553	0.359181	0.630656	1.49557	-1.21771			-1.12126	-0.4618	-0.34754	-1.11267	0.156831	-0.80279	0.257923
4.58333	-0.13863	0.325847	0.617322	1.36557	-1.27104			-1.05459	-0.43514	-0.32754	-1.11934	0.050164	-0.79279	0.251256
4.6	-0.14197	0.362514	0.653989	1.22891	-1.30771			-1.01792	-0.40847	-0.23421	-1.19267	0.026831	-0.74612	0.21459
4.61667	-0.11197	0.549184	0.647322	1.14891	-1.30771			-0.98792	-0.42514	-0.18754	-1.22934	0.016831	-0.68612	0.21459
4.63333	-0.00197	0.772514	0.663989	1.09224	-1.30437			-0.81126	-0.41847	-0.22754	-1.22267	0.003497	-0.69945	0.227923
4.65	0.034699	0.872514	0.710656	1.00557	-1.30437			-0.69792	-0.38514	-0.24421	-1.20267	0.010164	-0.72612	0.241256
4.66667	0.001366	0.782514	0.680656	1.01891	-1.29437			-0.65459	-0.3718	-0.24421	-1.20601	0.013497	-0.62279	0.19459
4.68333	-0.0353	0.402514	0.473989	1.24557	-1.24437			-0.67126	-0.3218	-0.23087	-1.17267	-0.00984	-0.49279	0.151256
4.7	-0.0653	0.252514	0.357322	1.26557	-1.30437			-0.71126	-0.31514	-0.19421	-1.14601	-0.03984	-0.45945	0.13459
4.71667	-0.1153	0.232514	0.300656	1.16557	-1.34771			-0.69126	-0.29514	-0.16421	-1.08934	-0.0465	-0.47279	0.11459
4.73333	-0.18863	0.252514	0.153989	1.11557	-1.36437			-0.67126	-0.2318	-0.12754	-1.01934	-0.08984	-0.50279	0.081256
4.75	-0.1853	0.299181	0.087322	1.09891	-1.29437			-0.55126	-0.16847	-0.12421	-0.95934	-0.10317	-0.48279	0.087923
4.76667	-0.1353	0.245847	0.160656	1.10891	-1.33437			-0.36792	-0.0418	-0.15421	-0.85267	-0.0865	-0.47945	0.117923
4.78333	-0.10863	0.175847	0.143989	1.12224	-1.48771			-0.35126	0.118197	-0.21087	-0.73267	-0.07984	-0.48945	0.06459
4.8	-0.09197	0.165847	0.130656	1.08891	-1.47771			-0.41792	0.204864	-0.19421	-0.69601	-0.08984	-0.49945	0.031256
4.81667	-0.07197	0.139181	0.057322	1.00224	-1.47104			-0.41459	0.278194	-0.16421	-0.65268	-0.10984	-0.57612	0.04459
4.83333	-0.08863	0.029181	-0.03268	1.02891	-1.47771			-0.43459	0.321534	-0.11087	-0.54934	-0.11984	-0.60612	0.081256
4.85	-0.13197	-0.00749	-0.12268	1.06891	-1.47771			-0.43126	0.324864	-0.13421	-0.34934	-0.13317	-0.61945	0.137923
4.86667	-0.1753	0.042514	-0.12601	1.10224	-1.47437			-0.37792	0.311534	-0.16421	-0.23934	-0.15317	-0.59279	0.201256
4.88333	-0.1953	0.075847	0.013989	1.08224	-1.41104			-0.27126	0.334864	-0.14754	-0.16934	-0.0865	-0.55279	0.271256
4.9	-0.1753	0.152514	0.203989	1.06224	-1.34104			-0.12126	0.368194	-0.14421	-0.05934	-0.0265	-0.52279	0.307923
4.91667	-0.14863	0.459181	0.353989	1.02891	-1.29104			-0.12126	0.258194	-0.13421	-0.00934	-0.01984	-0.46279	0.381257
4.93333	-0.09863	0.715844	0.330656	0.95224	-1.24771			-0.22459	0.108197	-0.13087	0.007323	-0.0465	-0.43945	0.417923
4.95	-0.00863	0.799184	0.280656	0.94224	-1.29104			-0.23792	-0.01847	-0.09421	-0.05934	-0.04984	-0.43612	0.47459
4.96667	0.048032	0.759184	0.257322	1.02224	-1.31771			-0.10792	-0.13847	-0.07754	-0.09601	-0.04984	-0.50612	0.491256
4.98333	0.071366	0.705844	0.190656	1.00891	-1.37771			0.015409	-0.19847	-0.08421	-0.05268	-0.06317	-0.50279	0.451257
5	0.118032	0.692514	0.173989	0.958907	-1.40104			0.095409	-0.19514	-0.05754	-0.06934	-0.04984	-0.45945	0.411257
5.01667	0.171366	0.692514	0.240656	0.888907	-1.37104			0.132076	-0.18514	-0.06421	-0.10934	-0.01984	-0.41612	0.437923
5.03333	0.154699	0.692514	0.367322	0.875573	-1.37771			0.378743	-0.1918	-0.04754	-0.10268	-0.07984	-0.31612	0.461257
5.05	0.064699	0.695844	0.513989	0.89224	-1.38437			0.468743	-0.20847	-0.04421	-0.02934	-0.11317	-0.32612	0.45459
5.06667	0.024699	0.692514	0.557322	0.898907	-1.31104			0.712076	-0.24514	-0.00754	0.027323	-0.11317	-0.39945	0.47459
5.08333	0.018032	0.685844	0.620656	0.92224	-1.24771			0.805409	-0.26847	0.042459	0.100656	-0.1465	-0.50279	0.467923
5.1	-0.01197	0.722514	0.677322	0.93224	-1.31104			0.728743	-0.29514	0.049126	0.173989	-0.15317	-0.51279	0.471257
5.11667	-0.04863	0.745844	0.707322	0.93224	-1.44437			0.605409	-0.34514	0.085792	0.170656	-0.19984	-0.45612	0.48459
5.13333	-0.14863	0.812514	0.723989	0.915573	-1.47437			0.518743	-0.4118	0.115792	0.150656	-0.21317	-0.43279	0.501256
5.15	-0.1853	0.879184	0.720656	0.91224	-1.44771			0.098743	-0.43514	0.049126	0.183989	-0.2165	-0.37279	0.491256
5.16667	-0.20197	0.889184	0.737322	0.92224	-1.29437			-0.22126	-0.44514	-0.02754	0.193989	-0.17317	-0.26279	0.471257
5.18333	-0.2353	0.829184	0.760656	0.95224	-1.21104			-0.28792	-0.4218	-0.08087	0.220656	-0.1065	-0.13612	0.49459
5.2	-0.2653	0.815844	0.780656	0.975573	-1.22104			-0.27792	-0.3618	-0.00421	0.213989	-0.0565	-0.06612	0.511256
5.21667	-0.25197	0.825844	0.817322	0.988907	-1.23104			-0.33792	-0.35847	0.042459	0.147323	-0.04984	-0.00279	0.517923
5.23333	-0.20863	0.819184	0.857322	0.925573	-1.22437			-0.39792	-0.35514	0.072459	0.150656	-0.07984	0.04388	0.48459
5.25	-0.0753	0.795844	0.897322	0.945573	-1.21437			-0.48792	-0.3018	0.109126	0.163989	-0.14984	0.030547	0.42459
5.26667	-0.0253	0.802514	0.923989	0.968907	-1.1777			-0.54792	-0.25847	0.169126	0.137323	-0.05984	0.07388	0.421257
5.28333	-0.0553	0.832514	0.917322	0.955573	-1.10104			-0.54459	-0.24514	0.219126	0.070656	0.016831	-0.03612	0.451257
5.3	-0.13863	0.919184	0.937322	0.94224	-1.0277			-0.57792	-0.2318	0.212459	-0.00268	-0.01317	-0.15945	0.471257
5.31667	-0.27197	1.08251	0.957322	0.898907	-0.92104			-0.71792	-0.2418	0.189126	-0.05601	-0.0865	-0.18612	0.481257
5.33333	-0.2553	1.21584	0.970656	0.878907	-0.88771			-0.79459	-0.2418	0.175792	-0.08268	-0.15984	-0.40279	0.461257
5.35	-0.24863	1.26251	1.02399	1.01224	-0.90771			-0.75792	-0.2318	0.182459	-0.17601	-0.2265	-0.51279	0.401257
5.36667	-0.24863	1.30584	1.07732	1.08891	-0.98104			-0.73792	-0.19847	0.129126	-0.24268	-0.2765	-0.54945	0.31459
5.38333	-0.2653	1.27251	1.09732	1.29224	-1.0477			-0.74792	-0.18847	0.072459	-0.28601	-0.28984	-0.62279	0.267923
5.4	-0.2653	1.19251	1.10399	1.48557	-1.14104			-0.77792	-0.21514	0.139126	-0.24268	-0.27984	-0.69279	0.257923
5.41667	-0.23863	1.20918	1.08066	1.59891	-1.19104			-0.80126	-0.2118	0.212459	-0.17934	-0.27984	-0.71612	0.241256
5.43333	-0.24863	1.14584	1.08066	1.51891	-1.20104			-0.82126	-0.1318	0.092459	-0.10268	-0.2865	-0.74612	0.221256
5.45	-0.23863	1.11251	1.15399	1.50891	-1.18104			-0.84459	-0.11514	-0.01421	-0.07268	-0.2565	-0.74945	0.231256
5.46667	-0.10863	1.23251	1.09066	1.44224	-1.10104			-0.85126	-0.1218	0.005792	-0.13601	-0.23317	-0.74279	0.26459
5.48333	0.174699	1.30918	0.970656	1.39224	-1.08104			-0.86459	-0.1218	0.009126	-0.17934	-0.2365	-0.70945	0.287923
5.5	0.248032	1.35584	1.07066	1.36224	-1.14104			-0.86459	-0.13847	0.045792	-0.20934	-0.2465	-0.64279	0.331257
5.51667	0.278032	1.33918	1.22732	1.28891	-1.22771			-0.86459	-0.29514	0.232459	-0.21934	-0.22984	-0.57279	0.34459
5.53333	0.231366	1.33251	1.24732	1.22891	-1.25771			-0.77792	-0.4818	0.282459	-0.24934	-0.2265	-0.54612	0.351257
5.55	0.168032	1.29251	1.25066	1.24224	-1.31771			-0.71459	-0.61847	0.315793	-0.27934	-0.18317	-0.54279	0.35459
5.56667	0.138032	1.22584	1.29066	1.15557	-1.40104			-0.59126	-0.64514	0.349126	-0.26601	-0.11984	-0.50612	0.331257
5.58333	0.071366	1.22251	1.34399	1.05557	-1.44437			-0.33792	-0.64514	0.352459	-0.25268	-0.0965	-0.47945	0.26459
5.6	0.191366	1.23251	1.36066	1.07891	-1.36437			-0.19126	-0.63847	0.382459	-0.23934	-0.14984	-0.50279	0.17459
5.61667	0.211366	1.18918	1.31066	1.28891	-1.34437			-0.05126	-0.68847	0.449126	-0.24268	-0.14317	-0.52279	0.10459
5.63333	0.181366	1.15918	1.26399	1.25891	-1.40437			0.122076	-0.72847	0.392459	-0.23268	-0.1165	-0.52279	0.03459
5.65	0.131366	1.14584	1.22732	1.05557	-1.46771			0.198743	-0.7218	0.399126	-0.23601	-0.12317	-0.51279	0.027923
5.66667	0.064699	1.07251	1.18066	0.898907	-1.49104			0.162076	-0.7218	0.459126	-0.15268	-0.1165	-0.50945	-0.01208
5.68333	0.061366	0.962514	1.09066	0.82224	-1.51771			-0.03459	-0.69514	0.375793	-0.07934	-0.07984	-0.50612	0.021256
5.7	-0.0353	0.932514	0.967322	0.635573	-1.46771			-0.07126	-0.6918	0.095792	-0.16934	-0.10984	-0.44279	0.121256
5.71667	-0.10863	0.915844	0.930656	0.51224	-1.27437			-0.04459	-0.6918	-0.03087	-0.18601	-0.1865	-0.37945	0.32459
5.73333	-0.1853	0.875844	0.913989	0.50224	-1.20437			-0.10126	-0.77514	-0.06754	-0.12601	-0.26317	-0.31279	0.471257
5.75	-0.26197	0.565844	0.930656	0.495573	-1.20437			-0.10459	-0.84847	-0.15087	-0.12268	-0.26317	-0.28279	0.61459
5.76667	-0.45863	0.455847	1.00732	0.485573	-1.17437			-0.08459	-0.8518	-0.19754	-0.13601	-0.2665	-0.29612	0.70459
5.78333	-0.55197	0.395847	1.06066	0.375574	-1.0877			-0.11459	-0.83514	-0.25754	-0.15601	-0.22317	-0.31279	0.75459
5.8	-0.6053	0.339181	1.09732	0.158907	-1.13437			-0.14459	-0.81514	-0.26087	-0.10934	-0.16317	-0.31279	0.741256
5.81667	-0.66863	0.179181	1.10399	0.075573	-1.24104			-0.12792	-0.80514	-0.11421	0.030656	-0.15317	-0.33945	0.817923
5.83333	-0.73863	0.185847	1.12399	-0.12109	-1.19437			-0.09126	-0.78847	-0.05087	0.070656	-0.15984	-0.36945	0.957923
5.85	-0.7653	0.255847	1.08399	-0.29776	-1.39771			-0.00126	-0.7818	-0.08754	-0.05268	-0.07984	-0.38945	0.951256
5.86667	-0.68863	0.259181	1.06732	-0.40443	-1.44771			0.048743	-0.7618	-0.19087	-0.05934	-0.05984	-0.39945	1.03126
5.88333	-0.4353	0.322514	1.04066	-0.38109	-1.51104			0.108743	-0.76847	-0.21421	-0.03268	-0.0565	-0.44612	1.01126
5.9	-0.31197	0.475847	0.960656	-0.18443	-1.54771			0.188743	-0.77847	-0.22754	-0.06601	-0.0765	-0.48612	0.911256
5.91667	-0.27863	0.535844	0.953989	-0.09443	-1.54437			0.238743	-0.71514	-0.26754	-0.02268	-0.0765	-0.50612	0.81459
5.93333	-0.27197	0.572514	1.02066	-0.09109	-1.53437			0.278743	-0.6518	-0.27421	0.037323	-0.08317	-0.46612	0.76459
5.95	-0.31197	0.655844	1.01399	-0.15109	-1.53437			0.295409	-0.63514	-0.27087	0.103989	-0.14317	-0.42279	0.727923
5.96667	-0.37863	0.782514	0.980656	-0.05443	-1.50771			0.305409	-0.63514	-0.28754	0.177322	-0.1265	-0.34945	0.677923
5.98333	-0.34197	0.849184	1.01066	-0.00109	-1.37771			0.342076	-0.63847	-0.26087	0.277322	-0.05984	-0.33612	0.617923
6	-0.3253	0.785844	1.12732	0.055573	-1.22771			0.355409	-0.6018	-0.20421	0.377323	-0.0465	-0.33612	0.55459
6.01667	-0.3953	0.712514	1.17066	0.085573	-1.19771			0.375409	-0.6018	-0.17421	0.497323	-0.0565	-0.32279	0.507923
6.03333	-0.46197	0.655844	1.20732	0.218907	-1.24104			0.382076	-0.65514	-0.17421	0.567323	-0.08317	-0.29279	0.501256
6.05	-0.53197	0.585844	1.27732	0.40224	-1.25771			0.408743	-0.6618	-0.16754	0.567323	-0.19984	-0.26945	0.481257
6.06667	-0.63197	0.592514	1.36732	0.47224	-1.23104			0.405409	-0.70514	-0.14421	0.593989	-0.22317	-0.29945	0.431257
6.08333	-0.55863	0.625844	1.42399	0.57224	-1.16437			0.345409	-0.6818	-0.14421	0.690656	-0.23317	-0.31279	0.397923
6.1	-0.34197	0.625844	1.45732	0.625573	-1.18104			0.292076	-0.6418	-0.13087	0.730656	-0.29984	-0.28945	0.42459
6.11667	-0.27863	0.672514	1.48066	0.59224	-1.19771			0.268743	-0.76847	-0.10754	0.720656	-0.3165	-0.30279	0.461257
6.13333	-0.27863	0.772514	1.47732	0.475573	-1.1277			0.242076	-0.82514	-0.12087	0.680656	-0.43984	-0.33279	0.451257
6.15	-0.25863	0.882514	1.44399	0.345574	-1.02104			0.235409	-0.69514	-0.15421	0.667323	-0.58984	-0.37612	0.447923
6.16667	-0.25197	0.842514	1.39066	0.32224	-0.94104			0.225409	-0.56847	-0.16421	0.693989	-0.67984	-0.40945	0.467923
6.18333	-0.23197	0.872514	1.33399	0.328907	-0.87437			0.185409	-0.49514	-0.18754	0.740656	-0.83984	-0.45612	0.487923
6.2	-0.20863	0.919184	1.26066	0.218907	-0.86437			0.142076	-0.47847	-0.22087	0.750656	-0.9065	-0.53279	0.477923
6.21667	-0.2053	0.942514	1.17732	0.095573	-0.85104			0.145409	-0.41847	-0.22421	0.760656	-0.8565	-0.57612	0.51459
6.23333	-0.20197	0.949184	1.14066	0.298907	-0.87437			0.152076	-0.26847	-0.17421	0.803989	-0.72984	-0.59945	0.53459
6.25	-0.24197	0.965844	1.09399	0.44224	-0.89104			0.118743	-0.15847	-0.24754	0.783989	-0.60984	-0.60279	0.591256
6.26667	-0.28197	1.01584	1.06066	0.405574	-0.88771			0.115409	-0.11847	-0.34087	0.783989	-0.56317	-0.56612	0.63459
6.28333	-0.3353	1.05918	0.943989	0.415574	-0.92104			0.152076	-0.13847	-0.35754	0.780656	-0.5465	-0.54279	0.617923
6.3	-0.3853	1.07584	0.827322	0.50224	-0.86104			0.162076	-0.13847	-0.34754	0.783989	-0.3865	-0.55945	0.611256
6.31667	-0.4353	1.05584	0.777322	0.585573	-0.77771			0.185409	-0.1218	-0.35421	0.793989	-0.3165	-0.57612	0.64459
6.33333	-0.45863	0.962514	0.763989	0.50224	-0.75104			0.195409	-0.18847	-0.32421	0.777323	-0.18984	-0.53279	0.687923
6.35	-0.27863	0.899184	0.753989	0.33224	-0.76437			0.175409	-0.2618	-0.21421	0.730656	-0.05317	-0.54612	0.68459
6.36667	-0.15863	0.835844	0.747322	0.10224	-0.76104			0.188743	-0.22514	-0.15754	0.680656	0.063497	-0.57279	0.65459
6.38333	-0.01197	0.762514	0.747322	-0.14109	-0.77771			0.195409	-0.24847	-0.20087	0.713989	0.126831	-0.57612	0.59459
6.4	0.108032	0.755844	0.763989	-0.01109	-0.79104			0.192076	-0.29847	-0.25754	0.767323	0.156831	-0.59612	0.587923
6.41667	0.091366	0.832514	0.780656	0.12224	-0.75437			0.085409	-0.32847	-0.36754	0.727323	0.193497	-0.64612	0.561256
6.43333	0.078032	0.939184	0.813989	-0.14776	-0.65437			-0.00459	-0.34847	-0.29754	0.620656	0.183497	-0.72612	0.471257
6.45	0.034699	1.06918	0.817322	-0.18109	-0.59771			-0.08126	-0.3518	-0.30421	0.537323	0.230164	-0.80612	0.411257
6.46667	0.061366	1.14918	0.777322	-0.32443	-0.58104			-0.14126	-0.37847	-0.35421	0.510656	0.263497	-0.89279	0.351257
6.48333	0.094699	1.07918	0.747322	-0.32109	-0.57437			-0.16792	-0.4018	-0.40087	0.523989	0.246831	-0.95945	0.297923
6.5	0.128032	1.00251	0.723989	-0.02109	-0.56771			-0.20126	-0.45847	-0.62421	0.547323	0.356831	-1.00279	0.291257
6.51667	0.161366	0.905844	0.750656	-0.06109	-0.54104			-0.28459	-0.5318	-0.66754	0.603989	0.453497	-1.10612	0.321257
6.53333	0.158032	0.902514	0.863989	-0.15109	-0.56437			-0.25459	-0.5418	-0.63087	0.623989	0.470164	-1.15279	0.30459
6.55	0.171366	0.949184	0.860656	-0.10109	-0.56771			-0.05459	-0.59514	-0.49421	0.587323	0.480164	-1.19279	0.347923
6.56667	0.174699	0.872514	0.720656	0.09224	-0.57104			0.058743	-0.68847	-0.32754	0.540656	0.483497	-1.19612	0.511256
6.58333	0.168032	0.815844	0.547322	0.21224	-0.63104			0.105409	-0.80847	-0.25754	0.480656	0.513497	-1.21612	0.651256
6.6	0.118032	0.905844	0.487322	0.22224	-0.68437			0.168743	-0.80514	-0.23754	0.420656	0.590164	-1.22279	0.54459
6.61667	0.018032	0.932514	0.350656	0.15224	-0.70437			0.252076	-0.7918	-0.21087	0.337322	0.610164	-1.19612	0.42459
6.63333	-0.01863	0.965844	0.287322	0.03224	-0.68437			0.308743	-0.81514	-0.19754	0.267322	0.580164	-1.13612	0.321257
6.65	0.084699	1.00918	0.223989	0.015573	-0.66104			0.348743	-0.83847	-0.17754	0.230656	0.496831	-1.03279	0.261256
6.66667	0.068032	1.01251	0.160656	0.078907	-0.65771			0.398743	-0.85847	-0.09421	0.217322	0.483497	-0.98279	0.271256
6.68333	-0.09197	0.995844	0.170656	0.158907	-0.63104			0.412076	-0.86514	0.045792	0.300656	0.490164	-0.93279	0.32459
6.7	-0.03197	1.02251	0.247322	0.038907	-0.67104			0.415409	-0.86847	0.192459	0.317322	0.480164	-0.95945	0.427923
6.71667	0.138032	1.02918	0.443989	-0.01776	-0.73771			0.442076	-0.86847	0.319126	0.253989	0.473497	-0.94945	0.451257
6.73333	-0.02197	1.00584	0.543989	-0.00443	-0.78771			0.508743	-0.94847	0.345793	0.147323	0.470164	-0.90279	0.621256
6.75	-0.0853	1.00251	0.467322	0.005573	-0.82771			0.532076	-0.9518	0.265793	0.027323	0.456831	-0.86945	0.997923
6.76667	0.011366	1.04251	0.283989	0.05224	-0.88104			0.498743	-0.9318	0.229126	-0.09601	0.400164	-0.86279	1.11126
6.78333	0.144699	1.04251	0.177322	0.18224	-0.89771			0.442076	-0.88847	0.272459	-0.22268	0.370164	-0.88945	1.02459
6.8	0.158032	0.969184	0.100656	0.175573	-0.89771			0.395409	-0.87514	0.345793	-0.25934	0.340164	-0.96279	0.83459
6.81667	0.108032	0.935844	0.050656	0.138907	-0.89771			0.362076	-0.8618	0.289126	-0.35268	0.336831	-1.03945	0.75459
6.83333	0.114699	0.885844	0.107322	0.25224	-0.93437			0.365409	-0.8318	0.262459	-0.44934	0.373497	-1.10945	0.73459
6.85	0.021366	0.752514	0.223989	0.668907	-0.98104			0.472076	-0.81514	0.225793	-0.52268	0.413497	-1.15612	0.577923
6.86667	-0.0053	0.689184	0.320656	0.755573	-0.93104			0.595409	-0.80847	0.105792	-0.56601	0.376831	-1.17945	0.54459
6.88333	0.031366	0.699184	0.453989	0.658907	-0.80104			0.555409	-0.77514	0.065792	-0.57268	0.300164	-1.17945	0.53459
6.9	0.041366	0.725844	0.537322	0.485573	-0.88437			0.462076	-0.67847	0.025792	-0.56268	0.256831	-1.15279	0.487923
6.91667	0.051366	0.735844	0.590656	0.355574	-1.0677			0.378743	-0.56847	0.095792	-0.47934	0.243497	-1.13945	0.54459
6.93333	0.074699	0.772514	0.620656	0.345574	-1.1377			0.412076	-0.5718	0.065792	-0.44268	0.243497	-1.10612	0.48459
6.95	0.038032	0.962514	0.750656	0.398907	-0.95437			0.462076	-0.5618	0.089126	-0.42934	0.263497	-1.06612	0.411257
6.96667	0.034699	1.14918	0.877322	0.40224	-0.80771			0.452076	-0.5018	0.025792	-0.32934	0.266831	-1.02612	0.46459
6.98333	-0.01863	1.36584	0.943989	0.38224	-0.74104			0.452076	-0.4518	-0.04087	-0.31934	0.203497	-0.94279	0.441257
7	-0.11863	1.46918	0.980656	0.395574	-0.64771			0.465409	-0.4018	0.049126	-0.36601	0.133497	-0.87279	0.41459
7.01667	-0.13197	1.47584	1.07066	0.398907	-0.68104			0.342076	-0.4418	0.072459	-0.39268	0.096831	-0.82279	0.46459
7.03333	-0.0953	1.32251	1.19732	0.468907	-0.79437			0.272076	-0.4518	0.102459	-0.42601	0.073497	-0.80945	0.481257
7.05	0.008032	1.10584	1.28066	0.47224	-0.74104			0.285409	-0.4918	0.109126	-0.39601	0.000164	-0.83612	0.487923
7.06667	0.008032	0.959184	1.23066	0.40224	-0.71771			0.285409	-0.6818	0.109126	-0.37268	-0.05984	-0.79279	0.487923
7.08333	0.004699	0.955844	1.16066	0.38224	-0.70104			0.272076	-0.85514	0.192459	-0.43601	-0.0865	-0.77612	0.481257
7.1	-0.02197	0.975844	1.13399	0.41224	-0.66104			0.285409	-0.97847	0.242459	-0.52601	-0.01317	-0.74945	0.43459
7.11667	-0.0353	0.969184	1.13066	0.415574	-0.69104			0.332076	-1.08514	0.282459	-0.58601	0.013497	-0.70279	0.427923
7.13333	-0.02197	0.999184	1.17066	0.38224	-0.78771			0.348743	-1.1518	0.299126	-0.65601	0.033497	-0.62279	0.411257
7.15	-0.01197	1.09918	1.14399	0.33224	-0.83437			0.302076	-1.19514	0.355793	-0.71268	0.070164	-0.67945	0.371257
7.16667	-0.07197	1.19584	1.11732	0.355574	-0.87104			0.252076	-1.20847	0.359126	-0.72601	0.026831	-0.78279	0.341257
7.18333	-0.11863	1.26918	1.13399	0.285574	-0.88771			0.225409	-1.2318	0.305793	-0.67934	0.030164	-0.79945	0.337923
7.2	-0.1653	1.26251	1.13066	0.27224	-0.86104			0.152076	-1.19514	0.285793	-0.62934	0.033497	-0.80612	0.451257
7.21667	-0.21863	1.25584	1.11399	0.258907	-0.81771			0.115409	-1.10514	0.235793	-0.52934	0.003497	-0.87279	0.611256
7.23333	-0.22197	1.19584	1.00399	0.23224	-0.77437			0.108743	-1.0618	0.289126	-0.46268	0.016831	-0.93945	0.641256
7.25	-0.1853	1.13251	0.843989	0.238907	-0.73104			0.155409	-1.0418	0.255793	-0.42601	0.033497	-0.94612	0.631256
7.26667	-0.14197	1.04251	0.727322	0.178907	-0.66771			0.165409	-1.00847	0.245793	-0.37268	0.070164	-0.87612	0.707923
7.28333	-0.0853	0.922514	0.657322	0.055573	-0.64104			0.072076	-0.91847	0.252459	-0.32601	0.083497	-0.81612	0.707923
7.3	-0.07197	0.775844	0.613989	0.025573	-0.60104			0.005409	-0.80514	0.282459	-0.32601	0.016831	-0.76279	0.687923
7.31667	-0.19197	0.722514	0.573989	0.24224	-0.60771			0.118743	-0.5718	0.142459	-0.26601	-0.01984	-0.67945	0.687923
7.33333	-0.2453	0.715844	0.767322	0.315574	-0.66771			0.192076	-0.43847	-0.01421	-0.17934	0.010164	-0.58945	0.56459
7.35	-0.2653	0.709184	0.873989	0.208907	-0.74104			0.222076	-0.4318	0.002459	-0.16601	0.013497	-0.56612	0.527923
7.36667	-0.2453	0.752514	0.933989	0.088907	-0.83437			0.188743	-0.62847	0.102459	-0.11268	0.016831	-0.52945	0.551256
7.38333	-0.2053	0.845844	1.08066	-0.00443	-0.93437			0.075409	-0.83847	0.252459	-0.01268	0.010164	-0.44945	0.54459
7.4	-0.08863	0.912514	1.08399	-0.04109	-1.0077			0.068743	-0.85514	0.372459	0.017323	-0.04317	-0.39279	0.477923
7.41667	-0.0353	0.989184	1.07066	0.015573	-1.0777			0.075409	-0.8318	0.545793	0.037323	-0.11984	-0.32279	0.32459
7.43333	-0.0853	1.03584	1.00732	-0.05443	-1.0977			0.078743	-0.81514	0.605793	0.100656	-0.37317	-0.28612	0.22459
7.45	-0.1453	1.01918	0.937322	-0.05776	-1.0277			0.045409	-0.7018	0.415793	0.210656	-0.4965	-0.33279	0.221256
7.46667	-0.15863	0.959184	0.913989	-0.06109	-0.95771			0.012076	-0.62514	0.205793	0.263989	-0.5565	-0.31945	0.297923
7.48333	-0.11197	0.895844	0.837322	-0.13109	-0.92104			0.005409	-0.47514	0.175792	0.353989	-0.60984	-0.29612	0.251256
7.5	-0.07863	0.875844	0.903989	-0.17443	-0.88437			0.018743	-0.32847	0.312459	0.480656	-0.64317	-0.27612	0.11459
7.51667	-0.24197	0.872514	0.980656	-0.10443	-0.82771			0.062076	-0.33847	0.465793	0.563989	-0.68984	-0.22945	0.121256
7.53333	-0.30863	0.872514	1.06066	0.098907	-0.84771			0.022076	-0.22514	0.482459	0.580656	-0.71984	-0.15945	0.051256
7.55	-0.30197	0.949184	1.07066	0.41224	-0.81437			0.018743	-0.09847	0.462459	0.593989	-0.7465	-0.08612	-0.03874
7.56667	-0.30863	1.10918	0.963989	0.29224	-0.79437			0.032076	-0.12847	0.389126	0.617323	-0.7365	-0.04279	0.01459
7.58333	-0.27197	1.12584	0.943989	0.035573	-0.82104			0.068743	-0.17847	0.189126	0.567323	-0.70984	-0.02612	0.121256
7.6	-0.22197	1.07584	0.927322	-0.13109	-0.86437			0.138743	-0.0618	0.199126	0.510656	-0.6865	0.00388	0.167923
7.61667	-0.18197	1.08584	0.833989	-0.23776	-0.97771			0.172076	-0.08847	0.242459	0.603989	-0.60984	0.057213	0.197923
7.63333	-0.11863	1.10918	0.783989	-0.21109	-1.03437			0.148743	0.004864	0.219126	0.670656	-0.6065	0.107213	0.221256
7.65	-0.0253	1.08251	0.777322	-0.17776	-1.07104			0.062076	0.111531	0.132459	0.740656	-0.56317	0.157213	0.221256
7.66667	-0.0053	0.932514	0.723989	-0.21776	-1.10104			-0.25459	0.188197	0.062459	0.893989	-0.3365	0.100547	0.30459
7.68333	-0.01197	0.855844	0.673989	-0.18443	-1.13104			-0.36459	0.174864	0.062459	1.05732	-0.14317	0.12388	0.351257
7.7	0.034699	0.892514	0.677322	-0.23776	-1.17437			-0.40126	0.038197	0.099126	1.15399	-0.1265	0.160547	0.361257
7.71667	0.051366	0.855844	0.560656	-0.23109	-1.23437			-0.43792	0.054864	0.172459	1.21399	-0.19317	0.200547	0.417923
7.73333	0.004699	0.662514	0.443989	-0.21776	-1.16437			-0.41459	0.188197	0.092459	1.24066	-0.2865	0.197213	0.351257
7.75	-0.10197	0.465847	0.390656	0.005573	-1.04104			-0.38126	0.211531	0.052459	1.31399	-0.38984	0.137213	0.367923
7.76667	-0.12197	0.362514	0.337322	0.248907	-0.95437			-0.39792	0.171531	0.012459	1.41066	-0.3965	0.030547	0.337923
7.78333	-0.0353	0.232514	0.333989	0.458907	-0.87771			-0.43126	0.204864	0.042459	1.43733	-0.3265	-0.09279	0.26459
7.8	-0.01197	0.159181	0.357322	0.435574	-0.80437			-0.54792	0.234864	0.109126	1.42066	-0.35984	-0.16279	0.207923
7.81667	0.104699	0.135847	0.337322	0.46224	-0.78771			-0.58792	0.298194	0.099126	1.35733	-0.26984	-0.21279	0.15459
7.83333	0.188032	0.082514	0.390656	0.605573	-0.78104			-0.75459	0.304864	0.202459	1.30733	-0.13984	-0.27279	0.241256
7.85	0.294699	0.089181	0.413989	0.648907	-0.67771			-0.85792	0.274864	0.239126	1.23732	-0.0065	-0.34945	0.157923
7.86667	0.444699	0.015847	0.447322	0.628907	-0.63437			-0.87792	0.188197	0.249126	1.15066	-0.01317	-0.38945	0.061256
7.88333	0.468032	-0.07749	0.490656	0.785573	-0.68771			-0.78459	-0.01514	0.272459	1.12066	-0.0465	-0.42945	0.097923
7.9	0.428032	-0.13082	0.493989	0.848907	-0.81104			-0.76126	-0.08847	0.259126	0.997323	-0.0865	-0.50279	0.147923
7.91667	0.234699	-0.19415	0.477322	0.828907	-0.78771			-0.79459	-0.10514	0.269126	0.990656	-0.07984	-0.51945	0.147923
7.93333	0.148032	-0.16749	0.357322	0.67224	-0.75104			-0.85126	-0.05847	0.285793	0.993989	-0.04984	-0.53612	0.091256
7.95	0.178032	-0.15415	0.257322	0.52224	-0.61771			-0.88459	-0.09847	0.355793	0.940656	-0.0565	-0.54612	-0.04208
7.96667	0.271366	-0.22749	0.277322	0.395574	-0.60437			-0.87792	-0.1918	0.422459	0.823989	-0.0565	-0.62612	-0.12541
7.98333	0.268032	-0.19082	0.320656	0.425574	-0.71771			-0.88126	-0.28514	0.415793	0.703989	-0.0065	-0.72612	0.01459
8	0.248032	-0.18415	0.353989	0.688907	-0.77437			-0.94459	-0.5118	0.305793	0.613989	-0.04317	-0.78279	0.187923
8.01667	0.251366	-0.17749	0.373989	0.675573	-1.02104			-0.93459	-0.61514	0.145792	0.543989	-0.1665	-0.82945	0.271256
8.03333	0.258032	-0.24082	0.347322	0.618907	-1.38771			-0.91459	-0.65514	0.035792	0.497323	-0.23984	-0.88945	0.217923
8.05	0.284699	-0.29415	0.320656	0.685573	-1.54104			-0.85459	-0.70847	-0.06754	0.537323	-0.2865	-0.90612	-0.06541
8.06667	0.308032	-0.50082	0.353989	0.74224	-1.53437			-0.81792	-0.92514	-0.05754	0.547323	-0.36984	-0.90279	-0.21541
8.08333	0.321366	-0.56415	0.407322	0.765573	-1.47437			-0.78792	-1.03847	0.009126	0.523989	-0.3865	-0.87279	-0.30874
8.1	0.454699	-0.51749	0.450656	0.685573	-1.47437			-0.72126	-1.10514	0.112459	0.527323	-0.38317	-0.88279	-0.32874
8.11667	0.474699	-0.42749	0.467322	0.67224	-1.43437			-0.73459	-1.18847	0.155792	0.647323	-0.16317	-0.80279	-0.22208
8.13333	0.394699	-0.37415	0.470656	0.528907	-1.44771			-0.79459	-1.24847	0.222459	0.680656	-0.04317	-0.83945	-0.12874
8.15	0.321366	-0.40415	0.400656	0.45224	-1.39437			-0.85126	-1.3418	0.219126	0.703989	0.020164	-0.96612	-0.09874
8.16667	0.198032	-0.45749	0.383989	0.428907	-1.1677			-0.90459	-1.55847	0.219126	0.780656	0.150164	-1.01945	0.057923
8.18333	0.028032	-0.48082	0.340656	0.345574	-0.93771			-0.93459	-1.79847	0.295793	0.840656	0.240164	-1.08279	0.197923
8.2	-0.0253	-0.45749	0.040656	0.45224	-0.79771			-0.89459	-1.89181	0.295793	0.807323	0.280164	-1.13612	0.161256
8.21667	-0.0253	-0.33415	-0.23268	0.425574	-0.79771			-0.79459	-1.7818	0.292459	0.810656	0.356831	-1.24612	0.111256
8.23333	-0.0353	0.009181	-0.23268	0.13224	-0.81771			-0.63459	-1.5818	0.019126	0.907323	0.496831	-1.30945	0.187923
8.25	-0.1053	0.132514	-0.06934	-0.01109	-0.73437			-0.50126	-1.23847	-0.21754	1.00066	0.470164	-1.34945	0.111256
8.26667	-0.2153	0.235847	-0.10601	-0.01109	-0.75771			-0.40126	-0.98847	-0.23421	0.913989	0.553497	-1.39612	0.037923
8.28333	-0.35863	0.222514	-0.16268	0.52224	-0.79771			-0.32126	-0.97514	-0.27421	0.850656	0.623497	-1.44945	0.03459
8.3	-0.39197	0.139181	-0.07934	0.775573	-0.73771			-0.20459	-1.10847	-0.32754	0.780656	0.553497	-1.50945	0.097923
8.31667	-0.31863	0.089181	0.127322	0.625573	-0.47771			-0.18126	-1.33514	-0.24754	0.680656	0.386831	-1.54945	0.161256
8.33333	-0.24863	0.142514	0.263989	0.338907	-0.51104			-0.19459	-1.27847	0.065792	0.517323	0.300164	-1.45945	0.151256
8.35	-0.1553	0.195847	0.243989	0.19224	-0.55104			-0.20459	-1.12514	0.162459	0.467323	0.483497	-1.38945	0.087923
8.36667	-0.0453	0.235847	0.317322	0.268907	-0.49437			-0.22792	-1.00514	0.085792	0.530656	0.613497	-1.37279	0.067923
8.38333	-0.0153	0.252514	0.350656	0.31224	-0.44437			-0.23126	-0.94514	-0.11421	0.627323	0.656831	-1.34612	0.111256
8.4	-0.0153	0.272514	0.247322	0.208907	-0.48437			-0.29792	-0.71514	-0.13421	0.610656	0.666831	-1.35279	0.061256
8.41667	-0.00197	0.419181	0.267322	0.225573	-0.46437			-0.56126	-0.64847	-0.00754	0.583989	0.620164	-1.49279	0.027923
8.43333	0.044699	0.472514	0.220656	0.32224	-0.42771			-0.86792	-0.6018	0.259126	0.517323	0.516831	-1.44612	-0.04541
8.45	0.041366	0.482514	0.167322	0.355574	-0.35104			-1.00792	-0.5118	0.395793	0.453989	0.516831	-1.45612	-0.07208
8.46667	-0.04863	0.465847	0.150656	0.325574	-0.31437			-1.12792	-0.51847	0.479126	0.407323	0.476831	-1.48945	-0.06874
8.48333	-0.1153	0.469181	0.267322	0.475573	-0.38771			-1.11792	-0.63847	0.359126	0.380656	0.356831	-1.47945	-0.06208
8.5	-0.1253	0.399181	0.300656	0.665573	-0.51104			-1.11459	-0.63847	0.309126	0.260656	0.203497	-1.55612	0.021256
8.51667	-0.16197	0.249181	0.363989	0.60224	-0.56437			-1.17459	-0.6918	0.235793	0.183989	0.166831	-1.69612	0.101256
8.53333	-0.15863	0.119181	0.413989	0.58224	-0.74437			-1.34459	-0.7818	0.135792	0.203989	0.163497	-1.76279	-0.13541
8.55	-0.1353	0.032514	0.467322	0.768907	-0.79771			-1.22459	-0.69847	0.079126	0.247322	-0.1665	-1.82279	-0.36541
8.56667	-0.02197	0.039181	0.493989	0.93224	-0.78437			-1.14125	-0.62514	0.042459	0.230656	-0.42984	-1.81612	-0.31541
8.58333	0.021366	0.085847	0.473989	1.22224	-0.79104			-1.11792	-0.6018	0.039126	0.307322	-0.41317	-1.71945	-0.15541
8.6	-0.01197	0.122514	0.473989	1.41557	-0.84437			-1.01459	-0.53514	0.122459	0.463989	-0.3165	-1.60279	-0.09541
8.61667	-0.11863	0.139181	0.417322	1.64891	-1.06104			-1.07126	-0.51514	0.212459	0.557323	-0.27317	-1.47945	0.00459
8.63333	-0.14863	0.112514	0.300656	1.65224	-1.29437			-1.07459	-0.40847	0.395793	0.643989	-0.33984	-1.45945	0.10459
8.65	-0.1453	0.035847	0.097322	1.50891	-1.41437			-1.00459	-0.16847	0.562459	0.627323	-0.44984	-1.32279	0.14459
8.66667	-0.1153	-0.03082	-0.09601	1.41224	-1.50771			-0.97459	-0.0918	0.595793	0.633989	-0.5365	-1.33612	-0.02874
8.68333	-0.07863	0.095847	-0.15268	1.45224	-1.56104			-0.95792	-0.10847	0.659126	0.660656	-0.40317	-1.41612	-0.04874
8.7	-0.05863	0.235847	-0.04268	1.59891	-1.49437			-0.76126	-0.0818	0.735793	0.670656	-0.27317	-1.42945	0.017923
8.71667	-0.1053	0.179181	-0.06268	1.65224	-1.30437			-0.72126	-0.04847	0.902459	0.660656	-0.36984	-1.42945	-0.04541
8.73333	-0.1153	0.122514	-0.17934	1.61891	-1.20771			-0.78126	-0.1618	0.972459	0.683989	-0.47984	-1.40945	-0.13208
8.75	-0.09863	0.082514	-0.27601	1.53891	-1.29771			-0.83126	-0.29514	0.899126	0.817323	-0.30317	-1.42945	-0.11208
8.76667	-0.06863	0.115847	-0.32934	1.62224	-1.46437			-0.87792	-0.22514	0.855793	0.890656	-0.3165	-1.39945	0.001256
8.78333	-0.00863	0.212514	-0.25934	1.66891	-1.65104			-0.84459	-0.0918	0.879126	0.830656	-0.47317	-1.32945	0.157923
8.8	0.011366	0.192514	-0.07934	1.57224	-1.86771			-0.61459	0.041531	0.912459	0.783989	-0.52984	-1.17612	0.327923
8.81667	0.058032	0.195847	0.040656	1.50891	-1.96771			-0.48126	-0.0518	0.879126	0.623989	-0.5565	-0.94279	0.347923
8.83333	0.011366	0.235847	0.057322	1.42224	-2.03104			-0.42459	0.108197	0.845793	0.477323	-0.53317	-0.91279	0.31459
8.85	-0.11863	0.259181	0.057322	1.14557	-2.06104			-0.24459	0.271534	0.802459	0.467323	-0.5265	-0.89945	0.201256
8.86667	-0.17197	0.285847	0.047322	1.19557	-2.08104			-0.05459	0.304864	0.715793	0.297322	-0.48984	-0.92945	-0.08208
8.88333	-0.2053	0.292514	0.157322	1.27891	-1.92437			-0.07792	0.094864	0.649126	0.110656	-0.52984	-1.13612	-0.19208
8.9	-0.2253	0.115847	0.207322	1.45891	-1.62771			-0.21459	-0.01514	0.725793	0.007323	-0.6165	-1.26279	-0.23208
8.91667	-0.2553	-0.00082	0.273989	1.52224	-1.56437			-0.22792	-0.10514	0.919126	-0.11601	-0.61984	-1.26945	-0.21874
8.93333	-0.24863	0.242514	0.333989	1.40224	-1.58437			-0.18459	-0.0918	1.05913	-0.16601	-0.61984	-1.23612	-0.19208
8.95	-0.17197	0.385847	0.393989	1.14557	-1.42437			-0.15792	-0.11847	1.02913	-0.17601	-0.54317	-1.35945	-0.27208
8.96667	-0.0753	0.295847	0.433989	0.88224	-1.41437			-0.19126	-0.1218	0.915793	-0.23268	-0.47984	-1.40279	-0.39541
8.98333	-0.0653	0.179181	0.503989	0.63224	-1.22771			-0.21126	0.001531	0.812459	-0.34934	-0.43984	-1.46945	-0.50541
9	-0.0953	0.239181	0.530656	0.805573	-1.07104			-0.24792	-0.1118	0.745793	-0.40601	-0.30984	-1.41279	-0.45874
9.01667	-0.0853	0.389181	0.560656	1.06557	-1.20771			-0.31792	-0.3318	0.699126	-0.58934	-0.28984	-1.33612	-0.49541
9.03333	-0.05863	0.532514	0.623989	1.27224	-1.50437			-0.30459	-0.4218	0.335793	-0.77267	-0.36317	-1.30279	-0.48874
9.05	-0.06863	0.585844	0.650656	1.21891	-1.55437			-0.27459	-0.46514	0.125792	-0.81267	-0.6065	-1.16945	-0.52208
9.06667	0.021366	0.685844	0.647322	1.12224	-1.42437			-0.22792	-0.6618	0.109126	-0.82934	-0.57317	-0.94612	-0.66541
9.08333	0.044699	0.732514	0.633989	0.65224	-1.32437			-0.14792	-0.77847	0.149126	-0.81934	-0.4365	-1.03279	-0.68541
9.1	0.141366	0.755844	0.587322	0.568907	-1.40437			-0.04459	-0.81847	0.225793	-0.80267	-0.34984	-1.04612	-0.54208
9.11667	0.178032	0.792514	0.580656	0.958907	-1.47771			-0.03126	-0.89847	0.339126	-0.83934	-0.3965	-1.05279	-0.42541
9.13333	0.201366	0.769184	0.473989	1.31891	-1.31437			-0.04126	-0.98514	0.395793	-0.74267	-0.51317	-1.12945	-0.38541
9.15	0.358032	0.792514	0.293989	1.22224	-1.38437			-0.00792	-0.9218	0.429126	-0.66934	-0.64317	-1.24612	-0.34208
9.16667	0.508032	0.782514	0.137322	1.27557	-1.42104			0.045409	-0.89847	0.249126	-0.68601	-0.58317	-1.29279	-0.42208
9.18333	0.531366	0.725844	0.067322	1.34557	-1.42437			0.058743	-0.94514	-0.08754	-0.84601	-0.55984	-1.31279	-0.38541
9.2	0.581369	0.715844	0.100656	1.28891	-1.48104			0.035409	-0.9018	-0.11421	-0.90934	-0.57317	-1.27279	-0.30541
9.21667	0.591369	0.755844	0.143989	1.20557	-1.43437			-0.05792	-0.8818	-0.03754	-0.95267	-0.59317	-1.23612	-0.04541
9.23333	0.511366	0.725844	0.187322	1.15557	-1.34104			-0.02459	-0.7518	-0.15087	-0.97601	-0.5965	-1.23279	-0.23208
9.25	0.371366	0.749184	0.507322	1.11224	-1.30771			0.082076	-0.5418	-0.37421	-0.85601	-0.56984	-1.15945	-0.50541
9.26667	0.198032	0.795844	0.683989	1.13224	-1.31437			0.085409	-0.50514	-0.23754	-0.86601	-0.6365	-1.09612	-0.53541
9.28333	0.141366	0.992514	0.723989	1.09557	-1.28104			-0.04459	-0.5418	-0.21754	-0.89267	-0.6365	-1.00279	-0.62875
9.3	0.118032	0.979184	0.667322	0.895573	-1.1677			-0.03792	-0.67847	-0.35087	-0.84601	-0.69984	-1.01945	-0.70208
9.31667	0.121366	0.792514	0.503989	0.808907	-1.22104			0.158743	-0.84847	-0.30087	-0.79934	-0.83984	-1.23279	-0.61208
9.33333	-0.06863	0.662514	0.420656	0.835573	-1.24437			0.285409	-1.0918	-0.25754	-0.75934	-0.85317	-1.37612	-0.63875
9.35	-0.27863	0.635844	0.390656	0.845573	-1.40437			0.232076	-1.17847	-0.26087	-0.69934	-0.8765	-1.32279	-0.69208
9.36667	-0.3553	0.585844	0.407322	0.708907	-1.31771			0.082076	-1.0218	-0.25754	-0.61934	-0.9965	-1.24945	-0.80875
9.38333	-0.34197	0.572514	0.347322	0.74224	-1.1677			-0.04792	-0.83514	-0.30087	-0.58601	-1.05984	-1.23279	-0.92875
9.4	-0.28863	0.619184	0.257322	0.79224	-1.15104			-0.05792	-0.71847	-0.33754	-0.54601	-1.14651	-1.12279	-0.99541
9.41667	-0.24197	0.632514	0.157322	0.69224	-1.24771			0.105409	-0.73514	-0.37754	-0.62934	-1.01984	-0.95945	-1.00208
9.43333	-0.1453	0.749184	0.063989	0.568907	-1.50104			0.172076	-0.8518	-0.45754	-0.67268	-0.7465	-0.97612	-1.05208
9.45	0.001366	0.672514	-0.04601	0.53224	-1.56437			0.225409	-0.80847	-0.45421	-0.68601	-0.50984	-0.91945	-1.05541
9.46667	0.028032	0.655844	-0.06601	0.47224	-1.60437			0.272076	-0.69514	-0.37421	-0.72268	-0.3565	-0.74279	-1.10875
9.48333	0.098032	0.655844	0.023989	0.445574	-1.64771			0.242076	-0.75847	-0.32421	-0.70601	-0.2965	-0.68945	-1.12208
9.5	0.274699	0.622514	0.153989	0.46224	-1.65437			0.185409	-0.80847	-0.31087	-0.65934	-0.37984	-0.61612	-1.09208
9.51667	0.318032	0.605844	0.267322	0.355574	-1.71771			0.142076	-0.8818	-0.29754	-0.50601	-0.27317	-0.55279	-1.30875
9.53333	0.188032	0.595844	0.313989	0.24224	-1.53771			0.095409	-0.7718	-0.10754	-0.46268	-0.2265	-0.46612	-1.47541
9.55	0.001366	0.512514	0.423989	0.268907	-1.35104			0.075409	-0.6618	0.015792	-0.42934	-0.2965	-0.41612	-1.54208
9.56667	-0.03197	0.375847	0.513989	0.378907	-1.31771			0.035409	-0.42847	0.185793	-0.39268	-0.39984	-0.40279	-1.47541
9.58333	0.001366	0.269181	0.627322	0.488907	-1.30437			0.038743	-0.28514	0.392459	-0.33934	-0.3965	-0.48279	-1.48875
9.6	0.118032	0.185847	0.603989	0.648907	-1.31104			0.065409	-0.37847	0.619126	-0.25601	-0.34317	-0.62279	-1.47875
9.61667	0.248032	0.159181	0.540656	0.64224	-1.35437			0.078743	-0.5418	0.602459	-0.17934	-0.3965	-0.67945	-1.47541
9.63333	0.214699	0.162514	0.300656	0.525573	-1.34437			0.122076	-0.56847	0.575793	-0.09934	-0.42984	-0.51279	-1.40875
9.65	0.048032	0.085847	0.143989	0.58224	-1.21104			0.185409	-0.58847	0.702459	-0.10601	-0.37984	-0.39945	-1.25875
9.66667	0.014699	-0.05082	0.143989	0.83224	-1.14437			0.205409	-0.51514	0.812459	-0.12934	-0.32984	-0.37945	-1.06541
9.68333	0.118032	-0.42082	0.167322	0.925573	-1.30437			0.148743	-0.52514	0.899126	-0.16934	-0.36984	-0.39612	-0.94875
9.7	0.084699	-0.52749	0.333989	0.84224	-1.38104			0.162076	-0.58514	0.802459	-0.22934	-0.32984	-0.40612	-0.99541
9.71667	0.101366	-0.56415	0.373989	0.928907	-1.42771			0.192076	-0.57847	0.649126	-0.29934	-0.33317	-0.45279	-1.01541
9.73333	0.121366	-0.57749	0.397322	1.03224	-1.54771			0.218743	-0.6118	0.419126	-0.29601	-0.34984	-0.52612	-0.98208
9.75	0.071366	-0.55415	0.400656	0.91224	-1.70437			0.275409	-0.7318	0.199126	-0.29601	-0.3365	-0.61279	-0.90541
9.76667	-0.01197	-0.66415	0.407322	0.82224	-1.91437			0.345409	-0.7718	0.189126	-0.30934	-0.36984	-0.67945	-0.82875
9.78333	-0.02863	-0.63415	0.447322	0.688907	-1.92771			0.518743	-0.8718	0.242459	-0.24601	-0.5165	-0.75945	-0.78208
9.8	-0.00863	-0.50415	0.423989	0.57224	-1.93437			0.612076	-1.07847	0.342459	-0.13934	-0.64317	-0.84279	-0.72875
9.81667	0.058032	-0.42415	0.490656	0.64224	-1.99104			0.582076	-1.1318	0.262459	0.010656	-0.64984	-0.90279	-0.72541
9.83333	0.104699	-0.39749	0.497322	0.608907	-2.04771			0.595409	-1.13847	0.289126	0.043989	-0.7065	-0.93612	-0.87208
9.85	0.121366	-0.28082	0.493989	0.625573	-1.94771			0.418743	-1.02514	0.429126	0.010656	-0.22317	-0.92612	-0.99875
9.86667	0.151366	-0.12082	0.480656	0.568907	-1.88104			0.232076	-0.8518	0.522459	0.053989	-0.0265	-0.90945	-1.05208
9.88333	0.154699	-0.12749	0.450656	0.468907	-1.77771			0.262076	-0.68847	0.485793	0.140656	0.043497	-0.89945	-0.98208
9.9	0.141366	-0.15749	0.393989	0.438907	-1.63771			0.438743	-0.50847	0.429126	0.337322	0.050164	-0.98612	-0.96541
9.91667	0.204699	-0.12749	0.267322	0.455574	-1.60771			0.495409	-0.59514	0.325793	0.410656	-0.0465	-1.14945	-1.05541
9.93333	0.241366	-0.04749	0.263989	0.488907	-1.60437			0.612076	-0.77514	0.262459	0.417323	0.003497	-1.29612	-1.15208
9.95	0.221366	0.129181	0.247322	0.505573	-1.60437			0.685409	-0.80847	0.252459	0.433989	0.126831	-1.37279	-1.20541
9.96667	0.154699	0.292514	0.193989	0.568907	-1.67771			0.565409	-0.83514	0.245793	0.493989	0.200164	-1.43945	-1.19541
9.98333	0.104699	0.309181	0.233989	0.568907	-1.74104			0.455409	-0.8418	0.285793	0.560656	0.260164	-1.47279	-1.08875
10	0.038032	0.209181	0.553989	0.638907	-1.80104			0.415409	-0.93847	0.319126	0.623989	0.246831	-1.56945	-1.08208
10.0167	0.148032	0.212514	0.780656	0.828907	-1.85771			0.398743	-1.0518	0.292459	0.633989	0.163497	-1.75612	-1.02541
10.0333	0.291366	0.209181	0.857322	1.00224	-1.77437			0.428743	-1.02514	0.245793	0.637323	0.053497	-1.85279	-0.79875
10.05	0.144699	0.145847	0.960656	0.998907	-1.46104			0.498743	-1.0218	0.299126	0.757323	0.006831	-1.84612	-0.72208
10.0667	0.138032	0.182514	1.06399	1.02891	-1.15437			0.532076	-1.02514	0.389126	0.783989	0.070164	-1.83612	-0.73875
10.0833	0.328032	-0.02415	1.12732	1.10557	-1.24104			0.478743	-1.1518	0.382459	0.757323	0.100164	-1.75279	-0.50541
10.1	0.341366	-0.31415	1.11732	0.978907	-1.37437			0.442076	-1.31847	0.295793	0.723989	-0.00317	-1.68279	-0.37541
10.1167	0.321366	-0.35415	1.05399	0.925573	-1.53104			0.468743	-1.4218	0.215793	0.663989	-0.09984	-1.55612	-0.77875
10.1333	0.348032	-0.23749	0.970656	0.70224	-1.92104			0.432076	-1.44514	0.205793	0.593989	-0.07317	-1.46945	-0.97541
10.15	0.334699	-0.13082	0.890656	0.658907	-1.92771			0.375409	-1.35514	0.185793	0.570656	-0.1565	-1.63945	-1.09875
10.1667	0.278032	-0.14749	0.860656	0.588907	-1.91771			0.408743	-1.09847	0.215793	0.587323	-0.19317	-1.82945	-1.02208
10.1833	0.191366	-0.13749	0.877322	0.408907	-2.17771			0.488743	-1.03514	0.295793	0.553989	-0.2565	-1.85279	-0.87208
10.2	0.021366	0.065847	0.957322	0.418907	-2.34437			0.505409	-1.11514	0.399126	0.477323	-0.2865	-1.89612	-0.86541
10.2167	0.041366	0.249181	0.943989	0.455574	-2.33771			0.498743	-1.0718	0.562459	0.347322	-0.2165	-1.91279	-0.84208
10.2333	0.091366	0.255847	0.877322	0.51224	-2.37771			0.652076	-1.09514	0.669126	0.297322	-0.11317	-1.89945	-0.83875
10.25	0.321366	0.049181	0.847322	0.658907	-2.28437			0.735409	-1.12514	0.609126	0.247322	0.013497	-1.82279	-0.84208
10.2667	0.541366	-0.15082	0.840656	0.868907	-2.17104			0.812076	-1.00514	0.599126	0.220656	0.093497	-1.56945	-0.77208
10.2833	0.611369	-0.15415	0.827322	0.96224	-2.10104			0.845409	-0.61847	0.682459	0.233989	0.056831	-1.39612	-0.70541
10.3	0.694699	-0.15749	0.873989	0.998907	-2.09771			0.758743	-0.3918	0.842459	0.183989	-0.0765	-1.34945	-0.73541
10.3167	0.534699	-0.00082	0.990656	0.865573	-2.15104			0.732076	-0.38514	0.779126	0.093989	-0.2365	-1.41945	-0.71875
10.3333	0.528032	0.252514	1.06066	0.758907	-2.13437			0.668743	-0.53514	0.699126	-0.01601	-0.20984	-1.40612	-0.62875
10.35	0.511366	0.345847	1.03399	0.788907	-1.95771			0.575409	-0.64514	0.619126	-0.14601	-0.2765	-1.28945	-0.59541
10.3667	0.201366	0.302514	0.947322	0.84224	-1.79771			0.652076	-0.77847	0.512459	-0.36601	-0.39317	-1.22612	-0.59541
10.3833	0.014699	0.135847	0.890656	0.965573	-1.55104			0.675409	-1.0018	0.409126	-0.52601	-0.3265	-1.04279	-0.65541
10.4	-0.02863	0.062514	0.653989	1.26891	-1.52437			0.672076	-0.8918	0.329126	-0.75934	-0.18317	-0.88279	-0.63875
10.4167	-0.11863	0.029181	0.487322	1.33224	-1.58437			0.738743	-0.47847	0.295793	-0.78601	-0.00317	-0.97945	-0.59541
10.4333	-0.0553	0.125847	0.483989	1.15891	-1.68104			0.755409	-0.05514	0.395793	-0.71934	0.176831	-1.08945	-0.65208
10.45	0.071366	0.329181	0.527322	1.13224	-1.74771			0.705409	-0.0018	0.472459	-0.57268	0.033497	-1.06612	-0.65208
10.4667	-0.02197	0.729184	0.777322	1.25891	-1.75437			0.695409	-0.0118	0.459126	-0.38268	-0.10984	-1.01612	-0.72875
10.4833	-0.16863	1.08584	0.970656	1.25224	-1.59771			0.685409	-0.0218	0.442459	-0.41601	-0.21317	-1.12945	-0.75875
10.5	-0.0953	1.14918	1.00399	1.24224	-1.43437			0.678743	-0.04514	0.462459	-0.38934	-0.37317	-1.10279	-0.80875
10.5167	0.078032	0.972514	0.850656	1.31224	-1.25437			0.732076	-0.03847	0.559126	-0.26601	-0.40984	-1.05945	-0.84875
10.5333	0.084699	0.772514	0.823989	1.28891	-0.83771			0.785409	-0.0618	0.549126	-0.12934	-0.48984	-1.04612	-0.72208
10.55	0.121366	0.539184	0.860656	1.40224	-0.72104			0.845409	-0.07847	0.435793	0.007323	-0.44317	-1.02612	-0.54541
10.5667	0.208032	0.312514	0.957322	1.46891	-0.70771			0.668743	-0.12847	0.435793	0.107323	-0.39984	-1.12279	-0.40208
10.5833	0.331366	0.242514	0.993989	1.51557	-0.62771			0.532076	0.071531	0.479126	0.167323	-0.3765	-1.27279	-0.38208
10.6	0.428032	0.269181	1.01399	1.45557	-0.48104			0.385409	0.091531	0.472459	0.310656	-0.3865	-1.38612	-0.38541
10.6167	0.431366	0.309181	1.04732	1.16557	-0.35104			0.325409	-0.00514	0.479126	0.370656	-0.27317	-1.38279	-0.58541
10.6333	0.411366	0.325847	1.08732	0.548907	-0.30437			0.188743	-0.06514	0.419126	0.443989	-0.2065	-1.28612	-0.59874
10.65	0.441366	0.279181	1.07066	0.065573	-0.29104			0.152076	-0.0718	0.392459	0.477323	-0.2265	-1.02279	-0.58208
10.6667	0.451366	0.359181	0.963989	-0.13443	-0.33104			0.172076	-0.12514	0.392459	0.427323	-0.24984	-1.01279	-0.54874
10.6833	0.501366	0.422514	0.930656	0.028907	-0.42771			0.185409	-0.10847	0.392459	0.380656	-0.25317	-1.17612	-0.52541
10.7	0.451366	0.505844	0.850656	0.678907	-0.44771			0.178743	0.024864	0.379126	0.380656	-0.28317	-1.38612	-0.54208
10.7167	0.294699	0.495844	0.740656	1.01891	-0.40771			0.152076	0.071531	0.335793	0.320656	-0.32984	-1.42279	-0.62875
10.7333	0.221366	0.322514	0.670656	1.24224	-0.53771			0.112076	-0.08514	0.285793	0.267322	-0.35984	-1.36945	-0.66875
10.75	0.181366	0.219181	0.597322	1.40891	-0.71437			0.125409	-0.22847	0.305793	0.277322	-0.41317	-1.31279	-0.67541
10.7667	0.148032	0.195847	0.567322	1.23224	-0.73771			0.162076	-0.16847	0.322459	0.337322	-0.32317	-1.19612	-0.73875
10.7833	0.118032	0.242514	0.513989	1.08224	-0.77771			0.132076	-0.16847	0.262459	0.280656	-0.28984	-1.14279	-0.81208
10.8	0.271366	0.239181	0.443989	1.06891	-0.80437			0.045409	-0.2618	0.175792	0.307322	-0.33317	-1.13612	-0.76541
10.8167	0.454699	0.099181	0.387322	1.16557	-0.89437			0.132076	-0.33847	0.212459	0.327322	-0.29984	-0.99945	-0.55874
10.8333	0.451366	-0.02082	0.350656	1.14557	-0.97771			0.208743	-0.2918	0.255793	0.380656	-0.27984	-0.74279	-0.51541
10.85	0.451366	-0.16082	0.310656	1.17224	-0.90771			0.128743	-0.19847	0.405793	0.423989	-0.27984	-0.59612	-0.58874
10.8667	0.528032	-0.20415	0.293989	1.31224	-0.92437			0.135409	-0.1418	0.545793	0.403989	-0.27317	-0.63945	-0.61208
10.8833	0.568029	-0.21749	0.253989	1.39557	-0.96104			0.282076	-0.09847	0.612459	0.347322	-0.29317	-0.74612	-0.58208
10.9	0.554699	-0.37082	0.150656	1.44557	-1.00104			0.495409	-0.04847	0.545793	0.170656	-0.2965	-0.87945	-0.39874
10.9167	0.574699	-0.48415	0.027322	1.38224	-1.04437			0.595409	-0.0018	0.459126	0.107323	-0.39317	-0.88279	-0.26541
10.9333	0.631369	-0.58082	-0.01934	1.30224	-1.10104			0.628743	0.034864	0.359126	0.137323	-0.53984	-0.87612	-0.21541
10.95	0.611369	-0.56749	0.210656	1.41557	-1.04104			0.658743	0.148197	0.329126	0.220656	-0.7065	-0.81945	-0.14541
10.9667	0.411366	-0.52415	0.327322	1.43891	-1.01437			0.668743	0.261534	0.315793	0.223989	-0.60317	-0.78612	-0.07541
10.9833	0.314699	-0.46415	0.230656	1.49224	-1.0777			0.672076	0.338194	0.235793	0.180656	-0.3365	-0.79612	-0.12208
11	0.288032	-0.51082	0.167322	1.57891	-0.91771			0.605409	0.274864	0.279126	0.160656	-0.26984	-0.71945	-0.17541
11.0167	0.181366	-0.56082	0.220656	1.59224	-0.89437			0.502076	0.188197	0.355793	0.140656	-0.42984	-0.71279	-0.26208
11.0333	0.134699	-0.49415	0.263989	1.51891	-0.87437			0.365409	0.221534	0.482459	0.180656	-0.50317	-0.80279	-0.22541
11.05	0.181366	-0.39415	0.220656	1.29891	-0.77771			0.295409	0.188197	0.512459	0.290656	-0.4865	-0.81279	-0.11874
11.0667	0.178032	-0.39749	0.193989	1.18224	-0.89104			0.272076	0.154864	0.219126	0.327322	-0.47317	-0.75945	-0.04541
11.0833	0.161366	-0.44082	0.177322	1.20891	-0.98437			0.318743	0.081531	0.002459	0.330656	-0.4165	-0.62279	0.08459
11.1	0.148032	-0.49415	0.230656	1.05557	-1.00437			0.318743	-0.07514	-0.03754	0.313989	-0.31317	-0.67279	0.08459
11.1167	0.118032	-0.34082	0.233989	1.00557	-0.97104			0.048743	-0.19514	0.085792	0.303989	-0.3365	-1.03945	0.081256
11.1333	0.158032	-0.23749	0.223989	1.22891	-0.98104			0.035409	-0.11514	0.189126	0.330656	-0.34317	-1.06612	0.117923
11.15	0.244699	-0.22415	0.257322	1.34891	-0.97437			0.045409	0.001531	0.275793	0.377323	-0.26984	-0.83612	0.08459
11.1667	0.271366	-0.19082	0.270656	1.42891	-1.02104			0.085409	0.078197	0.312459	0.340656	-0.1765	-0.69279	0.061256
11.1833	0.401366	-0.18082	0.250656	1.54557	-1.07104			0.138743	0.151531	0.255793	0.323989	-0.27317	-0.69945	0.00459
11.2	0.434699	-0.12082	0.213989	1.62891	-1.13437			0.155409	0.134864	0.275793	0.343989	-0.51317	-0.83279	-0.02208
11.2167	0.364699	-0.12415	0.200656	1.50224	-1.08437			0.185409	-0.03847	0.285793	0.380656	-0.48317	-1.19279	-0.01874
11.2333	0.358032	-0.07082	0.353989	1.54557	-0.97771			0.255409	-0.15847	0.305793	0.447323	-0.32317	-1.30612	0.021256
11.25	0.311366	-0.15082	0.403989	1.51557	-0.86104			0.332076	-0.09847	0.329126	0.543989	-0.31317	-1.29612	0.07459
11.2667	0.138032	-0.19415	0.380656	1.34224	-0.83437			0.378743	-0.0618	0.285793	0.543989	-0.36984	-1.23612	0.137923
11.2833	0.031366	-0.17749	0.400656	1.27891	-0.72437			0.372076	-0.1518	0.255793	0.447323	-0.4465	-1.21612	0.251256
11.3	-0.06863	-0.16415	0.427322	1.15224	-0.75104			0.312076	-0.13847	0.359126	0.317322	-0.44317	-1.29945	0.33459
11.3167	-0.1653	-0.07415	0.293989	1.05557	-0.77437			0.388743	-0.17514	0.382459	0.167323	-0.3965	-1.26612	0.261256
11.3333	-0.2453	0.115847	0.220656	0.888907	-0.64104			0.462076	-0.28847	0.459126	0.090656	-0.23984	-1.23945	0.28459
11.35	-0.30197	0.299181	0.213989	0.85224	-0.56771			0.635409	-0.41514	0.659126	0.077323	-0.1665	-1.24945	0.501256
11.3667	-0.20863	0.519184	0.153989	0.918907	-0.57437			0.678743	-0.59847	0.785793	0.113989	-0.13317	-1.17612	0.61459
11.3833	-0.18863	0.359181	0.013989	0.998907	-0.48771			0.595409	-0.7618	0.832459	0.117323	-0.36984	-1.06612	0.641256
11.4	-0.0953	0.195847	0.003989	1.14557	-0.44104			0.735409	-0.78847	0.815793	0.033989	-0.5165	-1.01945	0.631256
11.4167	-0.10863	0.199181	-0.00601	1.24557	-0.59104			1.00541	-0.7118	0.272459	-0.09601	-0.49317	-1.06945	0.56459
11.4333	-0.09863	0.285847	-0.11934	1.23557	-0.72437			0.998746	-0.6118	-0.00754	-0.07934	-0.43317	-1.12279	0.52459
11.45	-0.04197	0.205847	-0.18268	1.13891	-0.77771			0.902076	-0.5518	-0.23421	-0.10601	-0.39984	-1.09612	0.44459
11.4667	-0.05863	0.155847	-0.26934	0.878907	-0.62104			0.882076	-0.4718	-0.25754	-0.13601	-0.44317	-1.03279	0.41459
11.4833	-0.02863	0.225847	-0.19601	0.848907	-0.66104			0.868746	-0.37847	-0.20754	-0.15601	-0.50984	-0.96945	0.43459
11.5	-0.02863	0.112514	-0.28601	0.838907	-0.89437			0.842076	-0.34847	-0.13087	-0.21934	-0.5165	-0.96612	0.411257
11.5167	0.101366	0.105847	-0.32268	0.86224	-0.95104			0.755409	-0.4018	-0.04754	-0.27601	-0.60317	-1.04945	0.35459
11.5333	0.131366	-0.09415	-0.28601	0.735573	-0.94771			0.708743	-0.46514	-0.00087	-0.31268	-0.67317	-1.10612	0.28459
11.55	0.188032	-0.20082	-0.18601	0.725573	-1.05437			0.718743	-0.49514	0.052459	-0.34601	-0.66317	-1.16612	0.237923
11.5667	0.258032	-0.24082	0.040656	0.71224	-1.24104			0.528743	-0.43514	0.092459	-0.38268	-0.65984	-1.16612	0.301257
11.5833	0.218032	-0.38415	0.257322	0.568907	-1.31771			0.428743	-0.38847	0.102459	-0.41934	-0.77984	-1.24279	0.45459
11.6	0.064699	-0.52749	0.293989	0.62224	-1.40104			0.385409	-0.37847	0.105792	-0.46934	-0.97317	-1.34945	0.361257
11.6167	0.021366	-0.59415	0.230656	0.858907	-1.39437			0.372076	-0.35514	0.139126	-0.47601	-0.95984	-1.42612	0.167923
11.6333	0.121366	-0.74415	0.237322	0.968907	-1.33771			0.302076	-0.38847	0.159126	-0.41601	-0.84317	-1.45945	0.237923
11.65	0.181366	-0.78749	0.327322	1.02891	-1.13437			0.162076	-0.4018	0.149126	-0.38934	-0.7565	-1.51612	0.231256
11.6667	0.294699	-0.71082	0.307322	1.07224	-0.95437			0.182076	-0.46847	0.115792	-0.33268	-0.72317	-1.60945	0.137923
11.6833	0.328032	-0.62749	0.260656	0.898907	-0.82437			0.218743	-0.47514	0.125792	-0.18934	-0.7065	-1.70612	0.027923
11.7	0.328032	-0.55415	0.163989	0.79224	-0.74104			0.248743	-0.48847	0.195793	-0.04934	-0.6265	-1.80945	-0.13208
11.7167	0.344699	-0.53749	0.100656	0.81224	-0.72771			0.292076	-0.5318	0.225793	-0.02268	-0.6565	-1.79612	-0.13208
11.7333	0.341366	-0.57082	-0.05934	0.998907	-0.70437			0.368743	-0.58847	0.255793	-0.02268	-0.76984	-1.75612	-0.10874
11.75	0.398032	-0.53415	-0.15601	1.29224	-0.63437			0.408743	-0.6418	0.232459	0.050656	-0.7865	-1.76612	-0.13541
11.7667	0.528032	-0.54415	-0.02601	1.35557	-0.69104			0.335409	-0.72847	0.192459	0.053989	-0.75317	-1.77279	-0.07208
11.7833	0.691369	-0.54749	0.263989	1.24891	-0.70771			0.265409	-0.75847	0.219126	0.040656	-0.7065	-1.75945	0.041256
11.8	0.811369	-0.40082	0.243989	1.14891	-0.67771			0.228743	-0.7418	0.255793	0.153989	-0.67317	-1.74612	0.007923
11.8167	0.898029	-0.35082	0.160656	1.14891	-0.71771			0.105409	-0.76514	0.262459	0.250656	-0.66984	-1.72945	0.01459
11.8333	0.928029	-0.30082	0.170656	1.25224	-0.77104			-0.17459	-0.73514	0.329126	0.353989	-0.48317	-1.77279	0.007923
11.85	0.948029	-0.21415	0.217322	1.17557	-0.90771			-0.17126	-0.65514	0.399126	0.367322	-0.3565	-1.84612	0.071256
11.8667	0.841369	-0.04082	0.177322	1.12224	-1.01104			-0.02459	-0.59514	0.405793	0.383989	-0.25317	-1.87279	0.27459
11.8833	0.764699	0.109181	0.027322	0.998907	-1.0177			-0.16126	-0.5518	0.432459	0.387323	-0.08984	-1.91279	0.591256
11.9	0.814699	0.212514	0.000656	0.815573	-0.93104			-0.03126	-0.52847	0.362459	0.330656	-0.0565	-1.97279	0.557923
11.9167	0.908029	-0.00749	0.010656	0.765573	-0.80104			0.075409	-0.52514	0.355793	0.267322	-0.03984	-1.91612	0.481257
11.9333	1.0047	-0.15415	0.043989	0.81224	-0.74771			0.015409	-0.48847	0.149126	0.250656	-0.04317	-1.77612	0.547923
11.95	0.998029	-0.17082	0.027322	0.878907	-0.79771			-0.05792	-0.4218	-0.00754	0.307322	-0.03984	-1.65945	0.527923
11.9667	0.954699	-0.09082	-0.09601	1.06891	-0.83104			-0.19459	-0.44514	-0.06087	0.407323	-0.0365	-1.64279	0.347923
11.9833	0.988029	-0.13415	-0.15268	1.13557	-0.77771			-0.18459	-0.4418	-0.10754	0.440656	-0.1065	-1.73612	0.221256
12	0.988029	-0.31749	-0.07268	1.04891	-0.65437			0.002076	-0.36847	-0.07754	0.423989	-0.1165	-1.82945	0.27459

## Sheet: Tg(Myh11-CreERT2) Cap
Time	Tg(Myh11-CreERT2)	Tg(Myh11-CreERT2)	Tg(Myh11-CreERT2)	Tg(Myh11-CreERT2)	Tg(Myh11-CreERT2)	Tg(Myh11-CreERT2)	Tg(Myh11-CreERT2)	Tg(Myh11-CreERT2)	Tg(Myh11-CreERT2);Trpv1fl/fl	Tg(Myh11-CreERT2);Trpv1fl/fl	Tg(Myh11-CreERT2);Trpv1fl/fl	Tg(Myh11-CreERT2);Trpv1fl/fl	Tg(Myh11-CreERT2);Trpv1fl/fl
	S161	S562	T467	T751	U288	U893	U894	U896	S640	S558	T502	T506	T896
-1	-0.1641	-0.66164	-0.1259	-1.05984	0.568361	1.26426	0.376393	-0.07525	0.461148	-0.4382	-0.1618	-1.02689	-0.2323
-0.98333	-0.1941	-0.65164	-0.1859	-1.01984	0.478361	1.14426	0.456393	0.134754	0.471148	-0.4482	-0.3018	-1.00689	-0.2423
-0.96667	-0.2541	-0.57164	-0.1659	-0.73984	0.368361	1.05426	0.406393	0.274754	0.481148	-0.4782	-0.3218	-0.95689	-0.2423
-0.95	-0.3241	-0.45164	-0.2459	-0.23984	0.278361	1.01426	0.346393	0.464754	0.451148	-0.4682	-0.3118	-0.91689	-0.2523
-0.93333	-0.3941	-0.40164	-0.2259	-0.00984	0.218361	0.954262	0.426393	0.574754	0.451148	-0.3882	-0.2518	-0.89689	-0.2623
-0.91667	-0.4541	-0.43164	-0.2759	-0.02984	0.198361	0.904262	0.506393	0.634754	0.471148	-0.2882	-0.2118	-0.89689	-0.1923
-0.9	-0.3941	-0.37164	-0.3059	0.090164	0.188361	0.834262	0.556393	0.674754	0.501148	-0.2082	-0.1718	-0.94689	-0.1123
-0.88333	-0.3441	-0.36164	-0.2759	0.320164	0.158361	0.654262	0.526393	0.534754	0.471148	-0.1782	-0.1818	-0.98689	-0.0623
-0.86667	-0.2241	-0.39164	-0.3759	0.500164	0.008361	0.524262	0.626393	0.304754	0.401148	-0.1382	-0.2018	-0.97689	-0.0523
-0.85	0.185902	-0.34164	-0.5859	0.600164	-0.01164	0.144262	0.706393	0.154754	0.321148	0.001803	-0.2518	-0.99689	-0.0423
-0.83333	0.325902	-0.21164	-0.6859	0.780164	-0.01164	-0.25574	0.846393	0.114754	0.291148	0.131803	-0.2818	-0.54689	-0.0423
-0.81667	0.095902	-0.06164	-0.7859	0.920164	-0.01164	-0.46574	0.836393	0.144754	0.271148	0.231803	-0.3118	-0.34689	-0.0423
-0.8	-0.4641	-0.01164	-1.1359	0.970164	0.008361	-0.55574	0.796393	0.064754	0.291148	0.241803	-0.2818	-0.24689	-0.0323
-0.78333	-0.5741	0.118361	-1.3259	0.980164	0.018361	-0.50574	0.706393	-0.20525	0.311148	0.211803	-0.1918	-0.18689	-0.0023
-0.76667	-0.4841	0.218361	-1.3759	0.810164	0.028361	-0.46574	0.616393	-0.11525	0.251148	0.111803	-0.1418	-0.15689	0.087705
-0.75	-0.3741	0.268361	-1.3759	0.620164	0.048361	-0.51574	0.536393	0.144754	0.221148	-0.0282	-0.1118	-0.14689	0.137705
-0.73333	-0.4241	0.258361	-1.3359	0.470164	0.118361	-0.50574	0.486393	0.254754	0.201148	-0.0882	-0.0318	-0.14689	0.187705
-0.71667	-0.4641	0.268361	-1.2159	0.280164	0.258361	-0.59574	0.336393	0.344754	0.181148	-0.1182	0.038197	-0.15689	0.197705
-0.7	-0.4941	0.258361	-1.1059	0.060164	0.358361	-0.73574	0.066393	0.524754	0.191148	-0.1082	0.128197	-0.13689	0.197705
-0.68333	-0.4941	0.238361	-0.9059	-0.04984	0.398361	-0.90574	-0.17361	0.684754	0.171148	-0.0582	0.188197	-0.10689	-0.0923
-0.66667	-0.5941	0.228361	-0.7959	-0.12984	0.428361	-1.05574	-0.11361	0.754754	0.191148	0.001803	0.208197	-0.08689	-0.2623
-0.65	-0.6441	0.198361	-0.7159	-0.10984	0.448361	-1.13574	-0.05361	0.564754	0.211148	0.091803	0.148197	-0.11689	-0.5023
-0.63333	-0.5141	0.188361	-0.6159	-0.03984	0.518361	-1.07574	-0.15361	0.574754	0.201148	0.151803	0.088197	-0.06689	-0.6223
-0.61667	-0.4541	0.158361	-0.5259	0.030164	0.648361	-1.04574	-0.17361	0.704754	0.171148	0.191803	0.038197	0.083115	-0.6423
-0.6	-0.3841	0.098361	-0.4259	0.110164	0.678361	-1.07574	-0.30361	0.634754	0.161148	0.181803	-0.0118	0.323115	-0.6523
-0.58333	-0.5741	-0.15164	-0.3459	0.150164	0.678361	-1.09574	-0.42361	0.404754	0.231148	0.081803	-0.0018	0.573115	-0.6223
-0.56667	-0.5641	-0.12164	-0.2359	0.220164	0.698361	-0.99574	-0.46361	0.224754	0.201148	0.061803	-0.0018	0.733115	-0.5023
-0.55	-0.2241	-0.12164	-0.1759	0.290164	0.648361	-0.77574	-0.53361	0.194754	0.061148	0.131803	0.008197	0.783115	-0.2423
-0.53333	-0.1341	-0.13164	-0.0859	0.330164	0.488361	-0.64574	-0.51361	0.374754	0.031148	0.231803	0.078197	0.633115	-0.0623
-0.51667	-0.1441	-0.11164	-0.0359	0.330164	0.338361	-0.82574	-0.51361	0.364754	0.061148	0.321803	0.178197	0.433115	0.047705
-0.5	0.105902	-0.11164	0.154098	0.330164	0.158361	-0.92574	-0.49361	-0.28525	-0.05885	0.411803	0.238197	0.413115	0.197705
-0.48333	0.335902	-0.14164	0.134098	0.350164	-0.01164	-0.87574	-0.46361	-0.51525	-0.25885	0.311803	0.258197	0.363115	0.267705
-0.46667	0.275902	-0.14164	0.094098	0.390164	-0.28164	-0.80574	-0.48361	-0.49525	-0.21885	-0.0782	0.238197	0.073115	0.197705
-0.45	0.175902	-0.09164	0.064098	0.390164	-0.41164	-0.76574	-0.56361	-0.62525	-0.09885	-0.1782	0.238197	-0.02689	0.127705
-0.43333	0.075902	-0.08164	0.024098	0.380164	-0.44164	-0.59574	-0.60361	-0.68525	-0.06885	-0.1582	0.328197	0.163115	0.147705
-0.41667	-0.0541	-0.11164	0.054098	0.260164	-0.32164	-0.41574	-0.58361	-0.41525	-0.03885	-0.1582	0.358197	0.503115	0.217705
-0.4	-0.2341	-0.15164	0.264098	0.160164	-0.47164	-0.24574	-0.58361	-0.14525	-0.00885	-0.1882	0.288197	0.533115	0.247705
-0.38333	-0.2541	-0.17164	0.404098	0.060164	-0.82164	-0.25574	-0.52361	-0.21525	0.011148	-0.2182	0.218197	0.403115	0.277705
-0.36667	-0.1741	-0.17164	0.564098	0.020164	-0.83164	-0.25574	-0.46361	-0.27525	-0.03885	-0.2382	0.168197	0.303115	0.407705
-0.35	-0.0941	-0.14164	0.764098	-0.01984	-0.73164	-0.20574	-0.42361	-0.16525	-0.07885	-0.2582	0.208197	0.283115	0.467705
-0.33333	-0.0141	-0.11164	0.834098	-0.02984	-0.78164	-0.14574	-0.33361	-0.13525	-0.08885	-0.3082	0.208197	0.283115	0.447705
-0.31667	0.285902	-0.07164	0.904098	-0.03984	-0.80164	-0.00574	-0.28361	-0.17525	-0.08885	-0.3082	0.098197	0.313115	0.457705
-0.3	0.395902	-0.05164	0.904098	-0.03984	-0.85164	0.134262	-0.25361	-0.41525	-0.06885	-0.3182	-0.0118	0.363115	0.537705
-0.28333	0.465902	0.108361	0.844098	-0.04984	-0.93164	0.254262	-0.24361	-0.59525	-0.02885	-0.2682	-0.1618	0.423115	0.637705
-0.26667	0.515902	0.148361	0.894098	-0.04984	-0.90164	0.334262	-0.27361	-0.63525	-0.04885	-0.1982	-0.2318	0.423115	0.647705
-0.25	0.515902	0.158361	0.874098	-0.05984	-0.80164	0.414262	-0.24361	-0.60525	-0.11885	-0.0282	-0.2718	0.373115	0.487705
-0.23333	0.465902	0.148361	0.734098	-0.05984	-0.64164	0.464262	-0.04361	-0.56525	-0.33885	0.131803	-0.2518	0.243115	0.487705
-0.21667	0.415902	0.148361	0.774098	-0.03984	-0.41164	0.564262	0.276393	-0.49525	-0.49885	0.201803	-0.2418	0.133115	0.537705
-0.2	0.545902	0.208361	1.0141	-0.14984	-0.37164	0.624262	0.286393	-0.41525	-0.51885	0.261803	-0.2018	0.133115	0.617705
-0.18333	0.875902	0.218361	0.974098	-0.17984	-0.26164	0.624262	0.236393	-0.43525	-0.44885	0.331803	-0.1618	0.153115	0.677705
-0.16667	0.865902	0.238361	0.594098	-0.06984	-0.14164	0.654262	0.116393	-0.44525	-0.44885	0.351803	-0.0818	0.153115	0.737705
-0.15	0.805902	0.298361	0.404098	-0.10984	0.118361	0.714262	0.066393	-0.52525	-0.42885	0.331803	-0.0118	0.163115	0.667705
-0.13333	0.785902	0.348361	0.464098	-0.47984	0.188361	0.764262	0.006393	-0.45525	-0.41885	0.211803	0.028197	0.143115	0.587705
-0.11667	0.715902	0.368361	0.304098	-0.58984	0.038361	0.794262	-0.08361	-0.22525	-0.41885	0.081803	0.048197	0.103115	0.337705
-0.1	0.605902	0.388361	0.094098	-0.64984	0.018361	0.834262	-0.12361	-0.01525	-0.40885	0.041803	0.028197	0.093115	0.057705
-0.08333	0.485902	0.378361	-0.1159	-0.58984	0.028361	0.824262	-0.12361	0.084754	-0.44885	0.031803	0.078197	0.103115	-0.3023
-0.06667	0.415902	0.368361	0.104098	-0.66984	0.098361	0.824262	-0.10361	0.004754	-0.46885	0.101803	0.148197	0.153115	-0.5523
-0.05	0.355902	0.348361	1.0041	-0.88984	0.228361	0.854262	-0.11361	-0.28525	-0.49885	0.171803	0.198197	0.353115	-0.7823
-0.03333	0.255902	0.268361	1.3041	-1.06984	0.308361	0.864262	-0.12361	-0.34525	-0.52885	0.251803	0.328197	0.443115	-1.1923
-0.01667	0.155902	0.228361	1.3041	-1.02984	0.398361	0.874262	-0.10361	-0.23525	-0.58885	0.331803	0.298197	0.473115	-1.2623
0	0.065902	0.238361	1.2441	-0.90984	0.398361	0.824262	-0.09361	0.304754	-0.61885	0.401803	0.258197	0.463115	-1.2323
0.016667	0.035902	0.238361	1.1141	-0.85984	0.368361	0.754262	-0.00361	0.774754	-0.63885	0.421803	0.218197	0.423115	-0.9823
0.033333	0.035902	0.238361	1.4941	-1.07984	0.458361	0.344262	0.116393	0.564754	-0.67885	0.411803	0.158197	0.393115	-0.8223
0.05		0.248361	1.7441	-0.59984	0.518361	0.484262	0.116393	0.434754	-0.67885	0.401803	0.148197	0.333115	-0.8623
0.066667		0.358361	0.364098	-0.71984	0.508361	0.374262	-0.14361	0.444754	-1.46885	0.461803	0.268197	0.093115	-0.9323
0.083333	-0.0841	0.448361	0.384098	-0.87984	0.548361	0.034262	-0.05361	0.434754	-1.61885	0.421803	0.388197	-0.04689	-0.9723
0.1	-0.0941	0.398361	0.034098	-1.03984	0.568361	-0.44574	0.036393	-0.09525	-1.64885	-0.3182	1.4282	-0.22689	-1.1723
0.116667	-0.1641	0.638361	-0.4859	-1.07984	0.088361	-1.03574	0.036393	0.174754	-1.77885	-0.1382	0.008197	-0.41689	-1.5623
0.133333	-0.5341	0.268361	-1.5659	-1.21984	-0.05164	-1.45574	-0.09361	0.334754	-1.96885	-0.1782	-0.3918	0.383115	-2.0223
0.15	-0.9841	0.218361	-2.1859	-1.31984	-0.07164	-1.60574	-0.57361	0.344754	-2.08885	-0.2982	-0.6818	-0.03689	-2.3823
0.166667	-1.1041	0.058361	-2.3659	-1.54984	-0.00164	-1.70574	-1.13361	0.184754	-1.98885	-0.3182	-1.1818	-0.12689	-2.6223
0.183333	-0.7141	-0.36164	-2.3959	-1.93984	0.038361	-1.98574	-1.51361	-0.06525	-1.84885	-0.3582	-1.5218	-0.40689	-2.8423
0.2	-0.5641	-0.95164	-2.6059	-2.00984	0.228361	-2.43574	-1.94361	-0.24525	-1.98885	-0.6582	-1.7718	-0.92689	-3.0423
0.216667	-0.7941	-1.29164	-3.1059	-2.03984	0.128361	-2.96574	-2.38361	-0.39525	-2.12885	-0.8782	-2.2518	-0.92689	-3.1223
0.233333	-1.1141	-1.64164	-3.5359	-2.04984	0.088361	-3.42574	-2.75361	-0.45525	-2.36885	-1.0882	-2.5118	-0.93689	-3.3123
0.25	-1.2641	-1.89164	-4.2759	-1.93984	-0.10164	-3.81574	-3.11361	-0.64525	-2.66885	-1.3282	-2.5318	-1.00689	-3.5623
0.266667	-1.4841	-2.11164	-4.5459	-1.68984	-0.45164	-4.16574	-3.33361	-0.86525	-2.99885	-1.4882	-2.6418	-1.15689	-3.7723
0.283333	-1.4941	-2.36164	-4.8159	-1.63984	-0.80164	-4.51574	-3.58361	-1.00525	-3.23885	-1.6082	-2.8318	-1.36689	-3.9423
0.3	-1.7341	-2.85164	-5.3559	-1.58984	-1.03164	-4.82574	-3.94361	-1.06525	-3.35885	-1.6682	-3.1418	-1.47689	-4.1523
0.316667	-1.9941	-3.27164	-5.7259	-1.62984	-1.24164	-5.05574	-4.15361	-1.03525	-3.63885	-1.8082	-3.3518	-1.60689	-4.4523
0.333333	-1.7741	-3.62164	-5.9759	-1.70984	-1.58164	-5.24574	-4.26361	-1.06525	-3.81885	-1.8882	-3.4918	-1.84689	-4.5823
0.35	-1.6841	-3.88164	-6.0759	-1.75984	-1.85164	-5.35574	-4.41361	-1.05525	-3.73885	-1.7982	-3.6318	-2.03689	-4.7723
0.366667	-1.9441	-4.14164	-6.0859	-1.87984	-2.11164	-5.51574	-4.78361	-1.09525	-3.69885	-1.8982	-3.7218	-2.17689	-4.9223
0.383333	-2.6241	-4.39164	-5.9759	-1.79984	-2.24164	-5.55574	-5.10361	-1.22525	-3.78885	-2.2182	-3.8818	-2.30689	-5.0423
0.4	-2.9141	-4.72164	-6.2159	-1.53984	-2.30164	-5.51574	-5.40361	-1.39525	-4.04885	-2.4482	-4.1418	-2.49689	-5.0523
0.416667	-3.1241	-5.00164	-6.2759	-1.43984	-2.21164	-5.57574	-5.61361	-1.40525	-4.32885	-2.7282	-4.2518	-2.72689	-4.8923
0.433333	-3.2741	-5.21164	-6.1859	-1.44984	-2.24164	-5.65574	-5.72361	-1.34525	-4.52885	-2.9382	-4.5318	-2.84689	-4.8423
0.45	-3.2841	-5.35164	-6.2859	-1.45984	-2.29164	-5.75574	-5.89361	-1.15525	-4.70885	-3.1582	-4.8718	-2.96689	-5.1123
0.466667	-3.1941	-5.53164	-6.4159	-1.41984	-2.16164	-5.77574	-6.08361	-1.05525	-4.82885	-3.4482	-5.0418	-3.04689	-5.2523
0.483333	-3.3541	-5.69164	-6.4459	-1.50984	-1.73164	-5.90574	-6.16361	-1.19525	-5.16885	-3.5982	-5.1618	-3.12689	-5.2323
0.5	-3.5041	-5.86164	-6.3959	-1.61984	-1.77164	-5.93574	-6.23361	-1.43525	-5.44885	-3.7582	-5.2018	-3.24689	-5.1323
0.516667	-3.5841	-6.29164	-6.3959	-1.85984	-2.27164	-5.96574	-6.22361	-1.64525	-5.63885	-3.9882	-5.3018	-3.41689	-5.0423
0.533333	-3.2841	-6.52164	-6.5059	-2.24984	-2.53164	-5.90574	-6.13361	-1.75525	-5.86885	-4.3182	-5.4718	-3.57689	-4.9823
0.55	-3.1041	-6.60164	-6.4559	-2.52984	-2.22164	-5.85574	-6.26361	-1.71525	-5.96885	-4.5882	-5.4018	-3.70689	-4.9223
0.566667	-3.1841	-6.62164	-6.1159	-2.63984	-1.96164	-5.82574	-6.50361	-1.66525	-5.99885	-4.8182	-5.3718	-3.78689	-4.7623
0.583333	-3.4141	-6.68164	-6.2859	-2.62984	-2.14164	-5.64574	-6.80361	-1.54525	-5.90885	-4.9182	-5.8118	-3.89689	-4.6123
0.6	-3.6541	-6.74164	-6.4059	-2.54984	-2.64164	-5.41574	-6.96361	-1.41525	-5.83885	-4.8682	-5.8818	-3.98689	-4.7123
0.616667	-3.8941	-6.64164	-6.5559	-2.36984	-3.03164	-5.25574	-7.04361	-1.46525	-5.88885	-4.9582	-5.7818	-4.08689	-4.7823
0.633333	-4.1741	-6.49164	-6.7759	-2.30984	-3.25164	-5.20574	-7.08361	-1.61525	-6.02885	-5.0882	-5.7418	-4.16689	-4.7723
0.65	-4.2241	-6.49164	-6.8659	-2.48984	-3.35164	-5.14574	-7.12361	-1.84525	-6.21885	-5.2082	-5.7218	-4.23689	-4.5823
0.666667	-4.2541	-6.48164	-6.9159	-2.51984	-3.46164	-5.15574	-7.11361	-1.98525	-6.62885	-5.3782	-5.7718	-4.29689	-4.5923
0.683333	-4.2041	-6.32164	-6.9259	-2.56984	-3.58164	-5.11574	-7.06361	-2.00525	-6.88885	-5.6482	-5.8218	-4.48689	-4.6023
0.7	-4.1141	-6.25164	-6.8859	-2.57984	-3.45164	-4.86574	-6.94361	-2.00525	-7.07885	-5.8982	-5.8518	-4.59689	-4.2223
0.716667	-4.1041	-6.40164	-6.6259	-2.52984	-2.86164	-4.78574	-6.98361	-1.96525	-7.39885	-6.1282	-5.9418	-4.64689	-3.9723
0.733333	-4.6441	-6.39164	-6.5759	-2.47984	-2.63164	-4.74574	-6.92361	-1.83525	-7.49885	-6.3282	-6.0718	-4.69689	-3.9323
0.75	-5.1641	-6.27164	-6.6659	-2.44984	-2.67164	-4.76574	-6.69361	-1.83525	-7.41885	-6.6282	-6.1718	-4.77689	-3.8923
0.766667	-4.9841	-6.11164	-6.7359	-2.42984	-3.31164	-4.75574	-6.50361	-1.87525	-7.37885	-6.6682	-6.2418	-4.86689	-4.0323
0.783333	-4.7541	-6.22164	-6.8259	-2.45984	-3.35164	-4.72574	-6.41361	-1.90525	-7.48885	-6.6882	-6.3218	-5.03689	-4.2623
0.8	-4.6841	-6.25164	-6.9459	-2.47984	-2.99164	-4.78574	-6.26361	-1.95525	-7.54885	-6.8582	-6.4718	-5.14689	-4.5223
0.816667	-4.6141	-6.17164	-6.9959	-2.50984	-2.43164	-4.71574	-6.08361	-2.08525	-7.69885	-6.7182	-6.6018	-5.18689	-4.5723
0.833333	-4.4041	-6.09164	-6.9659	-2.51984	-2.25164	-4.61574	-5.98361	-2.16525	-7.74885	-6.5982	-6.8218	-5.23689	-4.4923
0.85	-4.3641	-5.95164	-7.0259	-2.49984	-2.27164	-4.50574	-5.82361	-2.15525	-7.69885	-6.5682	-6.8618	-5.29689	-4.2523
0.866667	-4.3141	-5.82164	-7.1659	-2.46984	-2.38164	-4.33574	-5.64361	-2.10525	-7.73885	-6.5182	-6.7318	-5.31689	-4.2223
0.883333	-4.1841	-5.62164	-7.2359	-2.44984	-2.52164	-4.18574	-5.55361	-2.11525	-7.94885	-6.4382	-6.6718	-5.33689	-4.3223
0.9	-3.9641	-5.61164	-7.2159	-2.48984	-2.68164	-4.06574	-5.31361	-2.08525	-8.17885	-6.4982	-6.6818	-5.36689	-4.2523
0.916667	-3.8741	-5.63164	-7.1759	-2.52984	-2.67164	-3.82574	-5.26361	-2.13525	-8.19885	-6.6882	-6.7118	-5.41689	-4.1723
0.933333	-3.6941	-5.55164	-7.1759	-2.49984	-2.55164	-3.65574	-5.35361	-2.15525	-8.01885	-6.8482	-6.7118	-5.49689	-4.1723
0.95	-3.5041	-5.51164	-7.1359	-2.45984	-2.38164	-3.55574	-5.41361	-2.16525	-7.92885	-6.9882	-6.7018	-5.64689	-4.1823
0.966667	-3.4341	-5.42164	-7.0659	-2.57984	-2.34164	-3.65574	-5.12361	-2.19525	-7.96885	-7.1082	-6.7318	-5.73689	-4.2023
0.983333	-3.3041	-5.26164	-7.0459	-2.71984	-2.28164	-3.81574	-4.95361	-2.15525	-7.73885	-7.1482	-6.7418	-5.84689	-4.2523
1	-3.2841	-5.34164	-7.0559	-2.83984	-2.08164	-3.98574	-4.78361	-2.06525	-7.67885	-7.1282	-6.7418	-5.93689	-4.3223
1.01667	-3.2641	-5.36164	-7.0159	-2.93984	-1.99164	-4.38574	-4.34361	-2.02525	-7.65885	-7.5282	-6.7318	-5.97689	-4.3023
1.03333	-3.1941	-5.31164	-7.1659	-2.99984	-1.92164	-4.57574	-4.07361	-2.02525	-7.73885	-7.8182	-6.7518	-6.03689	-4.2823
1.05	-3.2441	-5.21164	-7.1859	-3.01984	-1.86164	-4.73574	-3.93361	-2.18525	-7.75885	-7.9382	-6.7118	-6.13689	-4.3323
1.06667	-3.3041	-5.09164	-7.1459	-3.02984	-1.78164	-4.78574	-3.78361	-2.42525	-7.79885	-7.8882	-6.6718	-6.16689	-4.3023
1.08333	-3.2941	-5.02164	-7.2059	-3.02984	-1.80164	-4.67574	-3.62361	-2.50525	-7.99885	-7.8382	-6.6418	-6.17689	-4.1223
1.1	-3.1941	-4.95164	-7.2459	-3.02984	-1.49164	-4.46574	-3.44361	-2.53525	-8.18885	-7.7582	-6.6818	-6.18689	-3.9923
1.11667	-3.1041	-4.92164	-7.2559	-3.02984	-1.24164	-4.00574	-3.32361	-2.60525	-8.05885	-7.4582	-6.6918	-6.20689	-3.9023
1.13333	-3.2741	-4.88164	-7.2459	-2.98984	-1.18164	-3.72574	-3.24361	-2.65525	-7.92885	-7.3582	-6.6618	-6.25689	-3.7923
1.15	-3.2141	-4.72164	-7.1659	-2.86984	-1.13164	-3.59574	-3.17361	-2.69525	-7.96885	-7.5082	-6.4318	-6.29689	-3.6823
1.16667	-3.2041	-4.60164	-6.9559	-2.70984	-1.10164	-3.65574	-3.02361	-2.78525	-7.91885	-7.9482	-6.4018	-6.32689	-3.6423
1.18333	-3.2041	-4.51164	-6.9659	-2.60984	-1.01164	-3.83574	-2.75361	-2.75525	-7.76885	-8.0882	-6.4618	-6.36689	-3.5523
1.2	-3.2841	-4.42164	-6.9859	-2.41984	-0.85164	-4.05574	-2.35361	-2.38525	-7.75885	-8.1082	-6.4818	-6.42689	-3.4923
1.21667	-3.4341	-4.31164	-6.8959	-2.40984	-0.79164	-4.26574	-2.23361	-1.94525	-7.86885	-8.0182	-6.5018	-6.48689	-3.4423
1.23333	-3.4241	-4.19164	-6.6259	-2.36984	-0.68164	-4.36574	-2.20361	-1.77525	-7.86885	-7.6982	-6.5518	-6.51689	-3.3523
1.25	-3.4141	-4.07164	-6.4559	-2.37984	-0.34164	-4.27574	-2.10361	-1.67525	-8.04885	-7.5282	-6.5718	-6.55689	-3.2423
1.26667	-3.4241	-3.95164	-6.7759	-2.42984	-0.15164	-3.93574	-2.05361	-1.65525	-8.34885	-7.4382	-6.5718	-6.56689	-3.2123
1.28333	-3.6041	-3.84164	-7.0159	-2.50984	-0.12164	-3.52574	-1.88361	-1.71525	-8.46885	-7.4582	-6.5718	-6.55689	-3.1623
1.3	-3.9241	-3.74164	-7.1159	-2.55984	-0.13164	-3.13574	-1.67361	-1.75525	-8.44885	-7.5582	-6.5418	-6.55689	-3.1523
1.31667	-3.9241	-3.65164	-7.1159	-2.57984	-0.22164	-2.85574	-1.57361	-1.79525	-8.47885	-7.5482	-6.5118	-6.61689	-3.1323
1.33333	-3.8241	-3.54164	-7.0859	-2.62984	-0.44164	-2.75574	-1.48361	-1.79525	-8.62885	-7.4882	-6.4918	-6.63689	-3.0723
1.35	-3.4841	-3.50164	-7.0759	-2.70984	-0.51164	-2.66574	-1.37361	-1.82525	-8.68885	-7.5282	-6.4318	-6.63689	-3.0023
1.36667	-3.1741	-3.57164	-6.9959	-2.69984	-0.59164	-2.47574	-1.29361	-1.81525	-8.72885	-7.4582	-6.3218	-6.67689	-3.0623
1.38333	-3.0341	-3.75164	-6.8859	-2.81984	-0.64164	-2.30574	-1.01361	-1.83525	-8.80885	-7.4682	-6.1618	-6.65689	-3.0923
1.4	-2.6541	-3.79164	-6.7359	-2.89984	-0.59164	-2.12574	-0.83361	-1.84525	-8.81885	-7.5182	-6.0718	-6.63689	-2.9823
1.41667	-2.5041	-3.68164	-6.6059	-2.88984	-0.50164	-1.71574	-0.65361	-1.84525	-8.89885	-7.5382	-5.9818	-6.63689	-2.9623
1.43333	-2.6041	-3.59164	-6.5559	-2.89984	-0.39164	-1.48574	-0.57361	-1.88525	-9.05885	-7.4982	-5.8718	-6.64689	-2.9423
1.45	-2.5141	-3.59164	-6.5159	-2.90984	-0.18164	-1.36574	-0.52361	-1.83525	-9.13885	-7.5382	-5.7518	-6.66689	-2.8323
1.46667	-1.9841	-3.59164	-6.5659	-2.90984	0.018361	-1.25574	-0.37361	-1.39525	-9.20885	-7.7982	-5.8418	-6.70689	-2.6623
1.48333	-1.7541	-3.65164	-6.6459	-2.87984	0.118361	-0.99574	-0.21361	-1.17525	-9.29885	-7.8482	-5.7618	-6.72689	-2.5323
1.5	-1.6141	-3.53164	-6.6559	-2.82984	0.178361	-0.77574	-0.19361	-1.21525	-9.46885	-7.8382	-5.5718	-6.75689	-2.3623
1.51667	-1.4741	-3.53164	-6.6559	-2.78984	0.208361	-0.48574	0.016393	-1.24525	-9.49885	-7.7782	-5.5118	-6.95689	-2.2523
1.53333	-1.7041	-3.30164	-6.6459	-2.64984	0.248361	-0.48574	0.156393	-1.02525	-9.45885	-7.5282	-5.4818	-7.04689	-2.0323
1.55	-1.7341	-3.07164	-6.6359	-2.33984	0.288361	-0.40574	0.216393	-0.82525	-9.23885	-7.5482	-5.3218	-7.08689	-1.8523
1.56667	-1.6141	-3.11164	-6.6159	-2.15984	0.328361	-0.06574	0.326393	-0.74525	-9.08885	-7.6582	-5.2518	-7.08689	-1.6823
1.58333	-1.4441	-3.13164	-6.5359	-2.04984	0.368361	0.114262	0.436393	-0.74525	-9.11885	-7.6982	-5.2018	-7.06689	-1.5623
1.6	-1.3141	-3.09164	-6.4159	-1.93984	0.448361	0.254262	0.446393	-0.73525	-9.23885	-7.6682	-5.1718	-7.05689	-1.5423
1.61667	-1.2141	-3.06164	-6.2659	-1.93984	0.568361	0.434262	0.426393	-0.73525	-9.27885	-7.4882	-5.1518	-7.02689	-1.5023
1.63333	-1.1541	-2.83164	-6.1259	-2.00984	0.608361	0.544262	0.406393	-0.78525	-9.16885	-7.4682	-5.0418	-7.01689	-1.4223
1.65	-1.0741	-2.62164	-6.3059	-2.00984	0.628361	0.634262	0.496393	-0.78525	-9.11885	-7.5582	-4.9418	-6.98689	-1.4023
1.66667	-1.0041	-2.29164	-6.5959	-2.00984	0.668361	0.734262	0.716393	-0.85525	-9.33885	-7.5182	-4.7018	-6.95689	-1.2623
1.68333	-1.1341	-2.14164	-6.6459	-1.95984	0.688361	0.844262	0.956393	-0.84525	-9.34885	-7.4582	-4.4418	-6.96689	-1.2223
1.7	-1.2641	-2.14164	-6.4959	-1.96984	0.708361	0.914262	1.09639	-0.60525	-9.25885	-7.3182	-4.2018	-6.97689	-1.1423
1.71667	-1.1041	-2.14164	-6.4059	-2.16984	0.778361	1.02426	1.18639	-0.56525	-9.09885	-7.0282	-4.0818	-6.89689	-0.9023
1.73333	-0.9541	-2.00164	-6.3159	-2.28984	0.808361	1.17426	1.32639	-0.40525	-8.92885	-6.8282	-4.0518	-6.81689	-0.8523
1.75	-0.9541	-1.86164	-6.0159	-2.30984	0.808361	1.26426	1.50639	-0.33525	-9.15885	-6.6682	-3.8518	-6.82689	-0.8623
1.76667	-1.0141	-2.12164	-5.6259	-2.22984	0.878361	1.36426	1.61639	-0.33525	-9.23885	-6.4982	-3.6618	-6.83689	-0.7623
1.78333	-1.1341	-2.20164	-5.1459	-2.07984	1.04836	1.44426	1.70639	-0.29525	-9.11885	-6.3982	-3.4618	-6.76689	-0.5823
1.8	-1.2741	-2.20164	-5.1259	-2.15984	1.18836	1.50426	1.66639	0.004754	-8.99885	-6.2382	-3.3018	-6.71689	-0.7623
1.81667	-1.3641	-2.14164	-5.2659	-2.37984	1.14836	1.58426	1.59639	0.254754	-9.10885	-6.1282	-3.1018	-6.73689	-0.8023
1.83333	-1.4141	-2.07164	-5.2459	-2.44984	0.318361	1.65426	1.44639	0.184754	-9.17885	-6.2282	-2.9618	-6.79689	-0.6923
1.85	-1.4141	-2.01164	-5.1659	-2.26984	0.228361	1.73426	1.36639	0.074754	-9.24885	-6.4582	-2.8118	-6.79689	-0.5223
1.86667	-1.3741	-1.89164	-5.0959	-2.14984	0.508361	1.73426	1.35639	-0.47525	-9.28885	-6.4782	-2.6018	-6.77689	-0.4823
1.88333	-1.3441	-1.80164	-4.9559	-1.64984	0.438361	1.58426	1.34639	-0.92525	-9.26885	-6.4582	-2.4618	-6.76689	-0.4323
1.9	-1.4741	-1.74164	-4.8259	-1.69984	0.328361	1.67426	1.20639	-0.82525	-9.21885	-6.3582	-2.2818	-6.72689	-0.4023
1.91667	-1.4441	-1.70164	-4.7659	-1.89984	0.298361	1.79426	1.02639	-0.06525	-9.21885	-6.2882	-2.1218	-6.68689	-0.2823
1.93333	-1.3541	-1.70164	-4.9159	-1.91984	0.318361	1.92426	0.906393	0.214754	-9.25885	-6.2582	-1.9718	-6.66689	-0.0823
1.95	-1.3141	-1.60164	-4.9959	-1.84984	0.278361	2.15426	0.836393	0.334754	-9.36885	-6.1582	-1.8118	-6.71689	-0.0423
1.96667	-1.2941	-1.44164	-5.0859	-1.92984	0.208361	2.32426	0.686393	0.474754	-9.38885	-6.0982	-1.7118	-7.01689	-0.1023
1.98333	-1.5741	-1.34164	-5.0559	-2.05984	0.238361	2.37426	0.756393	0.534754	-9.32885	-6.0282	-1.5718	-7.14689	-0.1123
2	-1.6541	-1.27164	-4.9659	-2.03984	0.308361	2.33426	1.07639	0.524754	-9.29885	-5.8982	-1.4118	-7.17689	-0.1623
2.01667	-1.6741	-1.22164	-4.8759	-2.02984	0.298361	2.27426	1.17639	0.564754	-9.29885	-5.7282	-1.3518	-7.18689	-0.1823
2.03333	-1.8441	-1.22164	-4.8359	-2.03984	0.238361	2.20426	1.03639	0.794754	-9.26885	-5.5482	-1.3218	-7.17689	-0.1823
2.05	-2.0841	-1.27164	-4.7459	-1.87984	0.058361	2.10426	0.966393	0.794754	-9.22885	-5.5082	-1.2918	-7.06689	-0.1523
2.06667	-1.9041	-1.28164	-4.6759	-1.75984	-0.02164	1.99426	1.00639	0.704754	-9.25885	-5.4482	-1.2918	-6.90689	-0.1423
2.08333	-1.6941	-1.26164	-4.6159	-1.56984	-0.06164	1.76426	1.07639	0.764754	-9.34885	-5.3882	-1.2418	-6.86689	-0.2323
2.1	-1.5941	-1.22164	-4.4559	-1.44984	-0.09164	1.71426	1.08639	0.814754	-9.30885	-5.3682	-1.2918	-6.88689	-0.2723
2.11667	-1.6041	-1.20164	-4.3159	-1.55984	-0.19164	1.69426	1.09639	0.854754	-9.21885	-5.2482	-1.2918	-6.90689	-0.2823
2.13333	-1.6341	-1.21164	-4.1959	-1.60984	-0.28164	1.65426	1.06639	0.974754	-9.13885	-5.2182	-1.1318	-6.93689	-0.2923
2.15	-1.6641	-1.20164	-4.0659	-1.64984	-0.32164	1.51426	1.16639	1.00475	-9.07885	-5.0582	-1.0018	-6.99689	-0.2823
2.16667	-1.6541	-1.18164		-1.63984	-0.35164	1.34426	1.48639	0.914754	-9.04885	-4.6982	-0.9318	-7.02689	-0.2923
2.18333	-1.6441	-1.19164	-3.8459	-1.66984	-0.41164	1.33426	1.66639	0.824754	-9.06885	-4.5382	-0.9418	-7.07689	-0.3123
2.2	-1.6341	-1.19164	-3.5559	-1.76984	-0.46164	1.41426	1.63639	0.754754	-9.12885	-4.4382	-1.0418	-6.98689	-0.3123
2.21667	-1.6141	-1.19164	-3.3559	-1.86984	-0.47164	1.23426	1.59639	0.594754	-9.13885	-4.3682	-1.0918	-6.86689	-0.3223
2.23333	-1.4241	-1.12164	-3.2059	-1.92984	-0.45164	1.12426	1.55639	0.554754	-9.10885	-4.3982	-1.0718	-6.86689	-0.3223
2.25	-1.0841	-0.99164	-3.0659	-1.90984	-0.27164	0.844262	1.55639	0.764754	-9.04885	-4.5682	-1.0618	-6.83689	-0.3423
2.26667	-1.1541	-0.95164	-3.0259	-1.83984	-0.07164	0.604262	1.57639	0.734754	-9.01885	-4.5282	-1.0718	-6.74689	-0.3423
2.28333	-1.3641	-0.92164	-3.0159	-1.70984	-0.02164	0.214262	1.57639	0.774754	-9.04885	-4.4482	-1.0918	-6.65689	-0.3423
2.3	-1.4241	-0.92164	-2.9459	-1.64984	0.018361	0.104262	1.57639	0.924754	-9.01885	-4.3782	-1.1118	-6.43689	-0.3423
2.31667	-1.4441	-0.93164	-2.8259	-1.75984	0.058361	0.094262	1.63639	1.15475	-8.92885	-4.3282	-1.1418	-6.28689	-0.3523
2.33333	-1.4141	-0.91164	-2.7559	-1.96984	0.058361	0.074262	1.69639	1.22475	-8.79885	-4.4482	-1.1518	-6.20689	-0.3823
2.35	-1.0341	-0.85164	-2.6559	-2.00984	-0.00164	0.204262	1.77639	1.21475	-8.62885	-4.7282	-1.1418	-6.07689	-0.3923
2.36667	-0.4941	-0.96164	-2.6459	-1.97984	-0.06164	0.384262	1.90639	1.11475	-8.48885	-4.7082	-1.1218	-5.86689	-0.3923
2.38333	-0.4941	-1.16164	-2.6059	-1.95984	-0.22164	1.11426	1.93639	0.994754	-8.29885	-4.5182	-1.1118	-5.80689	-0.3923
2.4	-0.6441	-1.15164	-2.5159	-1.92984	-0.24164	1.44426	1.94639	0.994754	-8.29885	-4.3282	-1.0218	-5.74689	-0.3923
2.41667	-0.6641	-1.10164	-2.3659	-2.06984	-0.20164	1.05426	1.93639	1.01475	-8.55885	-4.1982	-0.8918	-5.53689	-0.3923
2.43333	-0.5841	-1.14164	-2.0259	-2.33984	-0.08164	0.974262	1.95639	1.02475	-8.58885	-4.2182	-0.9418	-5.32689	-0.3923
2.45	-0.5541	-1.27164	-1.7159	-2.46984	-0.07164	0.864262	1.92639	1.03475	-8.48885	-4.3282	-0.9818	-5.24689	-0.4023
2.46667	-0.3441	-1.25164	-1.4959	-2.64984	-0.04164	0.554262	1.92639	1.05475	-8.43885	-4.4382	-0.9818	-5.05689	-0.3823
2.48333	-0.0941	-1.15164	-1.4559	-2.70984	-0.07164	0.444262	1.91639	0.994754	-8.20885	-4.7182	-0.9918	-4.98689	-0.3523
2.5	0.095902	-1.00164	-1.5759	-2.64984	-0.13164	0.484262	1.86639	0.604754	-7.94885	-4.9382	-0.9618	-4.98689	-0.3323
2.51667	0.285902	-0.98164	-1.9359	-2.55984	-0.26164	0.594262	1.86639	0.584754	-7.79885	-5.1582	-0.9618	-4.99689	-0.3423
2.53333	0.435902	-0.88164	-2.1059	-2.27984	-0.22164	0.844262	1.90639	0.524754	-7.67885	-5.1382	-0.9518	-4.71689	-0.3523
2.55	0.285902	-0.77164	-2.1659	-2.14984	-0.06164	1.17426	2.00639	0.244754	-7.48885	-4.9982	-0.9618	-4.55689	-0.3823
2.56667	0.015902	-0.74164	-2.1459	-2.09984	-0.03164	1.25426	1.94639	0.154754	-7.27885	-4.6682	-0.9818	-4.52689	-0.4023
2.58333	0.175902	-0.60164	-2.0959	-2.06984	-0.06164	1.07426	1.90639	0.254754	-7.12885	-4.2782	-0.9818	-4.49689	-0.3823
2.6	0.345902	-0.36164	-2.0059	-2.01984	-0.03164	1.04426	1.87639	0.584754	-6.85885	-4.2482	-0.8318	-4.40689	-0.3423
2.61667	0.385902	-0.44164	-1.9259	-1.97984	0.148361	1.10426	1.88639	0.744754	-6.75885	-4.3182	-0.7818	-4.17689	-0.2923
2.63333	0.385902	-0.64164	-1.9159	-1.91984	0.328361	1.13426	2.10639	0.624754	-6.94885	-4.2982	-0.7718	-4.08689	-0.3423
2.65	0.375902	-0.70164	-1.8559	-1.90984	0.358361	0.964262	2.33639	0.254754	-6.90885	-4.2482	-0.7518	-4.01689	-0.4223
2.66667	0.365902	-0.69164	-1.6959	-1.90984	0.348361	0.784262	2.44639	0.274754	-6.63885	-4.2782	-0.7418	-3.89689	-0.4323
2.68333	-0.0541	-0.61164	-1.6359	-1.91984	0.388361	0.744262	2.39639	0.234754	-6.42885	-4.2982	-0.7318	-3.75689	-0.4623
2.7	-0.5941	-0.77164	-1.6059	-1.90984	0.478361	0.724262	2.21639	0.014754	-6.34885	-4.2682	-0.7218	-3.60689	-0.5123
2.71667	-0.8941	-0.86164	-1.5459	-1.79984	0.498361	0.714262	2.16639	-0.07525	-6.36885	-4.2982	-0.7118	-3.43689	-0.5623
2.73333	-0.9941	-0.98164	-1.5159	-1.82984	0.508361	0.224262	2.10639	-0.18525	-6.43885	-4.3482	-0.7018	-3.33689	-0.7123
2.75	-0.8941	-1.02164	-1.3759	-1.72984	0.488361	0.094262	2.03639	-0.09525	-6.51885	-4.3982	-0.6918	-3.21689	-0.8323
2.76667	-0.9141	-0.96164	-1.4059	-1.57984	0.418361	0.134262	1.91639	0.144754	-6.47885	-4.4282	-0.7118	-3.13689	-0.8423
2.78333	-1.1341	-0.83164	-1.3659	-1.50984	0.438361	0.284262	1.92639	0.284754	-6.40885	-4.3682	-0.7418	-3.08689	-0.8023
2.8	-1.2141	-0.85164	-1.2259	-1.43984	0.358361	0.434262	1.94639	0.254754	-6.33885	-4.3682	-0.9418	-2.84689	-0.7423
2.81667	-1.1441	-0.98164	-1.1659	-1.40984	0.348361	0.514262	1.94639	0.244754	-6.27885	-4.3582	-0.9418	-2.60689	-0.6823
2.83333	-1.0841	-1.11164	-1.1259	-1.44984	0.368361	0.564262	1.93639	0.204754	-6.21885	-4.2482	-1.1318	-2.47689	-0.6223
2.85	-1.0241	-1.16164	-0.9059	-1.81984	0.398361	0.724262	1.84639	0.114754	-6.23885	-4.0882	-1.2018	-2.43689	-0.5423
2.86667	-0.8641	-1.12164	-0.7659	-1.78984	0.428361	0.914262	1.66639	0.124754	-6.32885	-4.0282	-1.1318	-2.51689	-0.4723
2.88333	-0.7541	-1.03164	-0.7059	-1.65984	0.408361	1.05426	1.46639	0.174754	-6.34885	-4.0082	-1.0318	-2.57689	-0.4323
2.9	-0.7741	-0.99164	-0.7359	-1.42984	0.388361	1.15426	1.40639	0.374754	-6.31885	-3.9782	-1.0118	-2.61689	-0.4023
2.91667	-0.8241	-0.99164	-0.7359	-1.21984	0.558361	1.32426	1.54639	0.394754	-6.25885	-3.9782	-1.0318	-2.66689	-0.3723
2.93333	-0.8741	-1.06164	-0.8559	-1.09984	0.638361	1.31426	1.59639	0.414754	-6.14885	-3.9982	-1.0418	-2.71689	-0.3523
2.95	-0.9141	-0.97164	-0.9459	-1.25984	0.498361	1.11426	1.61639	0.454754	-5.87885	-3.9682	-0.9518	-2.66689	-0.3123
2.96667	-0.8841	-0.83164	-0.9659	-1.33984	0.118361	0.794262	1.60639	0.464754	-5.77885	-3.8982	-0.8418	-2.60689	-0.2823
2.98333	-0.9141	-0.68164	-0.9259	-1.11984	-0.00164	0.694262	1.55639	0.644754	-5.77885	-3.7482	-0.7818	-2.64689	-0.2723
3	-0.9341	-0.51164	-0.8559	-1.02984	0.028361	0.674262	1.59639	0.814754	-5.83885	-3.6582	-0.7418	-2.65689	-0.2823
3.01667	-0.9641	-0.47164	-0.8159	-1.18984	-0.21164	0.844262	1.52639	0.864754	-5.74885	-3.5982	-0.7018	-2.63689	-0.2623
3.03333	-1.0441	-0.54164	-0.7659	-1.47984	-0.18164	0.944262	1.46639	0.934754	-5.32885	-3.5582	-0.6718	-2.61689	-0.2123
3.05	-1.0341	-0.57164	-0.7059	-1.53984	-0.14164	0.934262	1.38639	0.974754	-5.16885	-3.5582	-0.6118	-2.55689	-0.0923
3.06667	-1.0241	-0.55164	-0.6359	-1.49984	0.058361	0.944262	1.24639	0.924754	-5.05885	-3.6982	-0.5818	-2.43689	0.077705
3.08333	-0.9541	-0.49164	-0.5459	-1.47984	0.328361	1.16426	1.11639	0.994754	-4.88885	-3.8082	-0.5918	-2.08689	0.127705
3.1	-0.9041	-0.49164	-0.5259	-1.45984	0.458361	1.20426	0.986393	1.07475	-4.79885	-3.8382	-0.6218	-1.94689	0.247705
3.11667	-0.8541	-0.43164	-0.5459	-1.61984	0.488361	0.754262	0.836393	1.26475	-4.72885	-3.8282	-0.7418	-1.77689	0.387705
3.13333	-0.7941	-0.39164	-0.5959	-1.67984	0.408361	0.654262	0.616393	1.39475	-4.68885	-3.7882	-0.9218	-1.63689	0.447705
3.15	-0.7541	-0.44164	-0.5859	-1.71984	0.268361	0.674262	0.436393	1.41475	-4.71885	-3.7382	-0.9718	-1.52689	0.817705
3.16667	-0.7041	-0.46164	-0.5559	-1.74984	0.278361	0.584262	0.396393	1.35475	-4.69885	-3.7282	-0.9218	-1.45689	1.0577
3.18333	-0.6041	-0.53164	-0.6159	-1.80984	0.288361	0.384262	0.346393	1.20475	-4.60885	-3.6282	-0.9318	-1.43689	1.18771
3.2	-0.5741	-0.64164	-0.7459	-1.82984	0.238361	0.114262	0.356393	1.32475	-4.49885	-3.5382	-1.0218	-1.40689	1.27771
3.21667	-0.5241	-0.70164	-0.7059	-1.84984	0.208361	0.174262	0.416393	1.68475	-4.50885	-3.5382	-1.1418	-1.34689	1.3877
3.23333	-0.4741	-0.70164	-0.6459	-1.83984	0.228361	0.234262	0.346393	1.84475	-4.44885	-3.5182	-1.1918	-1.31689	1.48771
3.25	-0.4241	-0.71164	-0.5259	-1.84984	0.368361	0.204262	0.366393	1.67475	-4.39885	-3.4282	-1.2018	-1.24689	1.5877
3.26667	-0.4141	-0.73164	-0.3959	-1.79984	0.518361	-0.08574	0.396393	1.62475	-4.38885	-3.3682	-1.2018	-1.18689	1.6377
3.28333	-0.4741	-0.76164	-0.2759	-1.71984	0.578361	-0.26574	0.386393	1.85475	-4.36885	-3.3282	-1.2018	-1.13689	1.71771
3.3	-0.5541	-0.82164	-0.2259	-1.69984	0.688361	-0.28574	0.356393	1.93475	-4.31885	-3.3182	-1.1118	-1.02689	1.76771
3.31667	-0.5241	-0.92164	-0.6059	-1.68984	0.818361	-0.06574	0.356393	1.82475	-4.29885	-3.3582	-1.0018	-0.98689	1.79771
3.33333	-0.1841	-0.97164	-0.6759	-1.67984	0.948361	0.154262	0.356393	1.80475	-4.22885	-3.4982	-0.9118	-0.98689	1.8077
3.35	0.315902	-0.97164	-0.6859	-1.68984	1.00836	0.294262	0.406393	1.80475	-4.15885	-3.6482	-0.8218	-0.98689	1.8477
3.36667	0.465902	-1.03164	-0.7259	-1.73984	1.06836	0.394262	0.466393	1.72475	-4.13885	-3.5482	-0.7418	-0.97689	1.72771
3.38333	0.395902	-1.05164	-0.8959	-1.78984	1.11836	0.524262	0.486393	1.80475	-4.10885	-3.5582	-0.6918	-0.95689	1.5677
3.4	0.435902	-1.06164	-0.9759	-1.78984	1.14836	0.604262	0.486393	1.98475	-4.05885	-3.6682	-0.6518	-0.91689	1.5977
3.41667	0.485902	-1.10164	-0.9459	-1.78984	1.21836	0.584262	0.516393	2.00475	-4.02885	-3.9082	-0.6318	-0.87689	1.6377
3.43333	0.305902	-0.99164	-0.8859	-2.03984	1.26836	0.444262	0.536393	2.04475	-3.98885	-3.9582	-0.5918	-0.84689	1.6377
3.45	0.255902	-0.77164	-0.8759	-2.26984	1.32836	0.374262	0.576393	2.11475	-3.90885	-3.9582	-0.5618	-0.79689	1.50771
3.46667	0.105902	-0.75164	-1.0659	-2.28984	1.38836	0.364262	0.486393	2.19475	-3.85885	-3.9082	-0.5518	-0.79689	1.43771
3.48333	-0.1841	-0.76164	-1.2859	-2.18984	1.43836	0.194262	0.486393	2.34475	-3.73885	-3.6282	-0.5718	-0.75689	1.3977
3.5	-0.2241	-0.77164	-1.1959	-2.13984	1.49836	0.084262	0.466393	2.53475	-3.70885	-3.4682	-0.5618	-0.71689	1.3677
3.51667	-0.0541	-0.79164	-1.0659	-2.11984	1.54836	-0.02574	0.456393	2.83475	-3.52885	-3.4382	-0.4718	-0.73689	1.19771
3.53333	0.215902	-0.78164	-1.0859	-2.06984	1.58836	-0.07574	0.446393	2.87475	-3.46885	-3.4582	-0.4318	-0.92689	1.0877
3.55	0.375902	-0.79164	-1.1059	-1.89984	1.68836	-0.12574	0.336393	2.64475	-3.46885	-3.4482	-0.5418	-0.96689	1.03771
3.56667	0.445902	-0.80164	-0.9659	-1.83984	1.73836	-0.18574	0.336393	2.48475	-3.44885	-3.7382	-0.8618	-0.88689	1.01771
3.58333	0.555902	-0.88164	-0.5559	-1.81984	1.76836	-0.17574	0.606393	2.32475	-3.39885	-3.8682	-1.1818	-0.88689	0.927705
3.6	0.495902	-1.06164	-0.5059	-1.88984	1.69836	-0.09574	0.966393	2.28475	-3.24885	-4.0082	-1.0618	-0.84689	0.747705
3.61667	0.385902	-1.06164	-0.4659	-2.00984	1.57836	-0.05574	1.12639	2.22475	-2.98885	-4.0182	-0.9318	-0.87689	0.647705
3.63333	0.305902	-1.04164	-0.3959	-2.04984	1.45836	-0.06574	1.15639	2.22475	-2.94885	-3.9982	-0.8218	-0.91689	0.637705
3.65	0.225902	-0.89164	-0.3359	-2.07984	1.42836	-0.08574	1.04639	2.30475	-2.93885	-3.9582	-0.7018	-0.93689	0.587705
3.66667	0.225902	-0.84164	-0.2959	-2.07984	1.44836	-0.06574	0.896393	2.20475	-2.94885	-3.9482	-0.6318	-0.98689	0.457705
3.68333	0.235902	-0.89164	-0.3759	-1.99984	1.45836	0.074262	0.696393	2.05475	-2.89885	-3.9182	-0.4518	-0.95689	0.307705
3.7	0.275902	-0.87164	-0.3859	-1.96984	1.40836	0.134262	0.536393	1.81475	-2.78885	-3.8582	-0.3818	-0.88689	0.227705
3.71667	0.325902	-0.64164	-0.3859	-2.01984	1.31836	0.204262	0.546393	1.63475	-2.77885	-3.7782	-0.3218	-0.94689	-0.0323
3.73333	0.345902	-0.49164	-0.3859	-2.14984	1.31836	0.304262	0.606393	1.47475	-2.82885	-3.6982	-0.1418	-1.09689	-0.2023
3.75	0.485902	-0.48164	-0.4159	-2.10984	1.32836	0.354262	0.346393	1.44475	-2.92885	-3.7282	-0.0118	-1.22689	-0.1723
3.76667	0.635902	-0.55164	-0.4659	-1.89984	1.34836	0.334262	0.166393	1.41475	-2.96885	-3.6982	0.078197	-1.31689	-0.0323
3.78333	0.675902	-0.49164	-0.4559	-1.82984	1.40836	0.274262	0.096393	1.34475	-2.90885	-3.6682	0.158197	-1.17689	-0.0223
3.8	0.665902	-0.46164	-0.3959	-1.81984	1.47836	0.164262	0.076393	1.07475	-2.91885	-3.5782	0.218197	-1.13689	-0.0423
3.81667	0.675902	-0.44164	-0.3459	-1.95984	1.67836	0.084262	0.116393	1.03475	-2.95885	-3.4482	0.058197	-1.13689	-0.0623
3.83333	0.675902	-0.30164	-0.3459	-1.96984	1.79836	0.014262	0.256393	1.13475	-2.74885	-3.3982	-0.1218	-1.06689	-0.1023
3.85	0.675902	-0.33164	-0.3959	-1.61984	1.87836	-0.04574	0.376393	1.27475	-2.58885	-3.4282	-0.2518	-1.05689	-0.2723
3.86667	0.685902	-0.38164	-0.4259	-1.64984	1.84836	-0.02574	0.486393	1.32475	-2.54885	-3.4782	-0.3118	-1.04689	-0.2723
3.88333	0.715902	-0.37164	-0.4159	-1.75984	1.81836	-0.09574	0.556393	1.21475	-2.64885	-3.4882	-0.3218	-1.05689	-0.2223
3.9	0.765902	-0.23164	-0.4259	-1.80984	1.85836	-0.01574	0.626393	1.07475	-2.71885	-3.5582	-0.3118	-1.03689	-0.2723
3.91667	0.795902	-0.10164	-0.3859	-1.83984	1.84836	0.184262	0.726393	0.984754	-2.77885	-3.6782	-0.3618	-1.04689	-0.3323
3.93333	0.795902	-0.14164	-0.3059	-1.87984	1.81836	0.144262	0.916393	0.584754	-2.69885	-3.6482	-0.3318	-1.17689	-0.3123
3.95	0.825902	-0.32164	-0.3659	-1.70984	1.81836	0.154262	0.996393	0.244754	-2.61885	-3.6482	-0.3418	-1.19689	-0.2623
3.96667	0.845902	-0.38164	-0.3359	-1.06984	1.86836	0.274262	0.986393	0.344754	-2.69885	-3.6282	-0.4218	-1.25689	-0.2123
3.98333	0.825902	-0.39164	-0.0259	-0.71984	1.86836	0.284262	0.956393	0.434754	-2.58885	-3.5182	-0.4218	-1.26689	-0.1123
4	0.615902	-0.38164	0.464098	-1.22984	1.81836	0.264262	1.05639	0.454754	-2.46885	-3.3882	-0.5418	-1.22689	-0.0623
4.01667	0.205902	-0.39164	0.564098	-1.67984	1.80836	0.134262	1.20639	0.444754	-2.42885	-3.3682	-0.6718	-1.22689	0.027705
4.03333	0.175902	-0.43164	0.484098	-1.77984	1.78836	0.524262	1.19639	0.444754	-2.32885	-3.3782	-0.7618	-1.22689	0.107705
4.05	0.245902	-0.30164	0.184098	-1.87984	1.72836	0.964262	1.12639	0.394754	-2.43885	-3.3582	-0.7618	-1.17689	0.237705
4.06667	0.235902	-0.06164	0.234098	-2.01984	1.69836	1.32426	1.00639	0.314754	-2.48885	-3.3382	-0.6618	-1.13689	0.277705
4.08333	0.225902	-0.07164	0.194098	-2.02984	1.65836	1.46426	1.18639	0.214754	-2.43885	-3.3282	-0.6118	-1.09689	0.267705
4.1	0.205902	-0.28164	0.214098	-1.90984	1.58836	1.53426	1.25639	0.174754	-2.38885	-3.2382	-0.5718	-1.01689	0.277705
4.11667	0.125902	-0.26164	0.354098	-1.78984	1.60836	1.58426	1.44639	0.374754	-2.23885	-3.1882	-0.5118	-0.92689	0.257705
4.13333	-0.0141	-0.20164	0.434098	-1.78984	1.72836	1.59426	1.59639	0.494754	-2.20885	-3.1482	-0.4418	-0.82689	0.257705
4.15	0.005902	-0.19164	0.454098	-1.79984	1.80836	1.61426	1.70639	0.604754	-2.20885	-3.0982	-0.4218	-0.71689	0.267705
4.16667	0.295902	-0.22164	0.464098	-1.71984	1.76836	1.63426	1.92639	1.06475	-2.21885	-3.0382	-0.3918	-0.60689	0.277705
4.18333	0.315902	-0.24164	0.514098	-1.70984	1.65836	1.65426	2.02639	1.31475	-2.19885	-3.0082	-0.3218	-0.55689	0.287705
4.2	0.135902	-0.26164	0.594098	-1.68984	1.63836	1.66426	2.13639	1.38475	-2.03885	-2.9882	-0.2918	-0.50689	0.217705
4.21667	0.025902	-0.32164	0.634098	-1.60984	1.64836	1.61426	2.22639	1.37475	-1.96885	-2.9582	-0.2318	-0.47689	0.187705
4.23333	-0.0041	-0.30164	0.624098	-1.47984	1.71836	1.62426	2.25639	1.01475	-1.92885	-2.9282	-0.3018	-0.46689	0.187705
4.25	0.065902	-0.31164	0.644098	-1.23984	1.75836	1.63426	2.35639	0.804754	-1.99885	-2.8782	-0.4918	-0.44689	0.177705
4.26667	0.065902	-0.31164	0.664098	-0.95984	1.78836	1.68426	2.64639	0.934754	-2.10885	-2.8282	-0.5818	-0.39689	0.197705
4.28333	0.065902	-0.32164	0.644098	-0.76984	1.86836	1.72426	2.79639	1.04475	-2.14885	-2.7682	-0.6118	-0.36689	0.207705
4.3	0.085902	-0.32164	0.624098	-0.71984	1.94836	1.72426	2.84639	1.26475	-2.17885	-2.7282	-0.6218	-0.30689	0.207705
4.31667	0.125902	-0.30164	0.614098	-0.75984	1.98836	1.72426	2.95639	1.34475	-2.13885	-2.6782	-0.6318	-0.16689	0.207705
4.33333	0.145902	-0.30164	0.684098	-0.71984	1.99836	1.73426	3.08639	1.38475	-2.12885	-2.6182	-0.6118	-0.12689	0.227705
4.35	0.145902	-0.30164	0.684098	-0.59984	1.98836	1.70426	3.10639	1.37475	-2.07885	-2.5582	-0.5918	-0.16689	0.267705
4.36667	0.095902	-0.33164	0.644098	-0.52984	1.95836	1.70426	3.07639	1.18475	-2.04885	-2.3982	-0.5818	-0.15689	0.307705
4.38333	0.055902	-0.36164	0.474098	-0.49984	1.91836	1.73426	3.02639	0.904754	-2.01885	-2.3082	-0.5318	-0.11689	0.337705
4.4	0.035902	-0.37164	0.494098	-0.49984	1.84836	1.75426	2.98639	1.05475	-1.98885	-2.3382	-0.4618	-0.08689	0.327705
4.41667	0.065902	-0.39164	0.634098	-0.56984	1.78836	1.78426	2.91639	1.15475	-1.91885	-2.2482	-0.4418	-0.06689	0.337705
4.43333	0.245902	-0.40164	0.624098	-0.73984	1.75836	1.70426	2.87639	1.35475	-1.85885	-2.1982	-0.4218	-0.03689	0.397705
4.45	0.335902	-0.41164	0.574098	-0.76984	1.70836	1.67426	2.65639	1.78475	-1.93885	-2.1682	-0.3918	-0.00689	0.477705
4.46667	0.385902	-0.42164	0.534098	-0.75984	1.66836	1.72426	2.40639	2.03475	-1.96885	-2.1782	-0.3018	0.023115	0.477705
4.48333	0.375902	-0.42164	0.434098	-0.63984	1.78836	1.81426	2.65639	2.05475	-1.95885	-2.2182	-0.2918	0.093115	0.457705
4.5	0.455902	-0.41164	0.484098	-0.43984	1.96836	1.85426	2.77639	1.94475	-1.92885	-2.2282	-0.2218	0.143115	0.417705
4.51667	0.445902	-0.36164	0.634098	-0.23984	2.04836	2.01426	2.77639	1.79475	-1.87885	-2.2382	-0.1218	0.193115	0.377705
4.53333	0.115902	-0.33164	0.624098	-0.11984	1.80836	2.02426	2.69639	1.69475	-1.85885	-2.2382	-0.1218	0.203115	0.337705
4.55	0.055902	-0.34164	0.664098	-0.03984	1.64836	1.95426	2.65639	1.84475	-1.83885	-2.2182	-0.1218	0.243115	0.277705
4.56667	0.055902	-0.36164	0.714098	-0.01984	1.45836	1.94426	2.67639	2.00475	-1.81885	-2.1582	-0.1418	0.133115	0.267705
4.58333	-0.0041	-0.43164	0.664098	-0.30984	1.31836	1.93426	2.83639	1.96475	-1.79885	-2.1082	-0.1518	0.063115	0.307705
4.6	-0.0341	-0.47164	0.634098	-0.52984	1.30836	1.95426	2.86639	1.91475	-1.72885	-2.0582	-0.0518	-0.08689	0.367705
4.61667	-0.0441	-0.49164	0.694098	-0.52984	1.21836	1.99426	2.75639	1.77475	-1.63885	-2.0082	0.008197	-0.09689	0.417705
4.63333	-0.1241	-0.51164	0.714098	-0.44984	1.06836	1.96426	2.39639	1.64475	-1.58885	-1.9482	-0.0118	0.043115	0.377705
4.65	-0.1941	-0.47164	0.704098	-0.36984	0.998361	1.91426	2.26639	1.46475	-1.52885	-1.8782	-0.0018	0.333115	0.317705
4.66667	-0.1941	-0.43164	0.674098	-0.29984	0.938361	1.95426	2.31639	1.31475	-1.47885	-1.8582	0.058197	0.393115	0.317705
4.68333	-0.2241	-0.57164	0.654098	-0.25984	0.858361	2.04426	2.23639	1.13475	-1.44885	-1.8282	0.058197	0.273115	0.397705
4.7	-0.2141	-0.62164	0.654098	-0.24984	0.848361	2.18426	2.11639	1.05475	-1.42885	-1.8082	-0.0218	0.043115	0.367705
4.71667	-0.1741	-0.53164	0.804098	-0.24984	0.998361	2.33426	2.11639	1.08475	-1.40885	-1.7982	-0.0418	-0.14689	0.297705
4.73333	-0.0841	-0.43164	1.0641	-0.27984	1.02836	2.45426	2.19639	1.25475	-1.40885	-1.7982	-0.0618	-0.37689	0.197705
4.75	-0.0541	-0.27164	1.2741	-0.30984	0.958361	2.56426	2.27639	1.44475	-1.45885	-1.7882	-0.1218	-0.52689	0.167705
4.76667	-0.1541	-0.15164	1.1341	-0.34984	0.968361	2.64426	2.31639	1.36475	-1.61885	-1.7782	-0.1218	-0.60689	0.187705
4.78333	-0.3441	-0.03164	0.964098	-0.74984	1.11836	2.69426	2.32639	1.37475	-1.69885	-1.7582	-0.1718	-0.61689	0.177705
4.8	-0.3241	0.048361	0.964098	-0.87984	1.16836	2.75426	2.27639	1.33475	-1.82885	-1.7282	-0.2218	-0.64689	0.177705
4.81667	-0.2841	0.088361	0.934098	-0.88984	1.24836	2.78426	2.28639	0.744754	-1.99885	-1.7182	-0.2318	-0.69689	0.237705
4.83333	-0.2641	0.058361	0.824098	-0.86984	1.25836	2.78426	2.27639	0.444754	-2.09885	-1.6482	-0.2618	-0.74689	0.307705
4.85	-0.2241	0.008361	0.784098	-0.68984	1.18836	2.80426	2.22639	0.344754	-2.09885	-1.5982	-0.2418	-0.92689	0.387705
4.86667	-0.1341	-0.01164	0.464098	-0.49984	1.15836	2.86426	2.15639	0.354754	-2.06885	-1.8882	-0.1018	-1.28689	0.477705
4.88333	-0.0441	-0.02164	0.284098	-0.30984	1.07836	2.93426	2.06639	0.354754	-1.99885	-1.9682	-0.0518	-1.19689	0.547705
4.9	-0.1241	-0.04164	0.304098	-0.17984	1.25836	2.95426	2.01639	0.264754	-1.93885	-1.9382	-0.1618	-0.97689	0.557705
4.91667	-0.2441	-0.06164	0.264098	-0.08984	1.43836	3.03426	1.95639	0.084754	-1.77885	-1.9082	-0.2818	-0.80689	0.587705
4.93333	-0.2241	-0.10164	0.114098	-0.05984	1.53836	3.15426	1.91639	0.074754	-1.76885	-1.8982	-0.3218	-0.87689	0.617705
4.95	-0.1141	-0.11164	0.044098	-0.03984	1.47836	3.16426	1.88639	0.144754	-1.64885	-1.8382	-0.3318	-1.04689	0.317705
4.96667	-0.0641	-0.13164	0.074098	-0.00984	1.50836	3.17426	1.88639	0.094754	-1.64885	-1.8382	-0.3918	-1.31689	0.117705
4.98333	-0.0441	-0.16164	0.234098	-0.02984	1.72836	3.42426	1.81639	-0.01525	-1.62885	-1.8482	-0.4718	-1.33689	0.057705
5	-0.0341	-0.18164	0.284098	-0.03984	1.89836	3.39426	1.74639	-0.19525	-1.52885	-1.8282	-0.5018	-0.96689	0.107705
5.01667	-0.0641	-0.22164	0.254098	-0.03984	1.88836	2.77426	1.62639	-0.22525	-1.42885	-1.8082	-0.4918	-0.91689	0.287705
5.03333	-0.1141	-0.29164	0.124098	-0.03984	1.87836	2.38426	1.54639	-0.20525	-1.35885	-1.7782	-0.4518	-0.94689	0.297705
5.05	-0.0141	-0.35164	0.104098	0.020164	2.08836	1.87426	1.44639	-0.15525	-1.27885	-1.7682	-0.4518	-0.26689	0.217705
5.06667	0.075902	-0.45164	0.184098	0.050164	2.12836	1.73426	1.37639	-0.15525	-1.16885	-1.7582	-0.4418	-0.35689	0.257705
5.08333	0.135902	-0.41164	0.244098	0.090164	1.72836	1.63426	1.29639	-0.19525	-1.09885	-1.7182	-0.4318	-1.04689	0.357705
5.1	0.615902	-0.32164	0.634098	0.100164	1.41836	1.49426	1.26639	-0.23525	-1.00885	-1.7082	-0.3618	-1.28689	0.387705
5.11667	1.0259	-0.28164	0.674098	0.120164	1.34836	1.41426	1.21639	-0.22525	-0.88885	-1.6082	-0.3518	-0.91689	0.407705
5.13333	1.2359	-0.12164	0.664098	0.160164	1.27836	1.36426	1.14639	-0.16525	-0.77885	-1.4882	-0.3318	-0.86689	0.407705
5.15	0.945902	0.188361	0.624098	0.120164	1.23836	1.35426	1.06639	-0.23525	-0.72885	-1.5282	-0.3318	-1.28689	0.407705
5.16667	0.685902	0.408361	0.634098	0.080164	1.29836	1.31426	1.02639	-0.37525	-0.67885	-1.6082	-0.3218	-1.38689	0.417705
5.18333	0.595902	0.448361	0.754098	0.020164	1.42836	1.31426	1.00639	-0.45525	-0.68885	-1.7082	-0.3218	-1.44689	0.427705
5.2	0.435902	0.378361	0.974098	-0.14984	1.51836	1.33426	1.05639	-0.47525	-0.70885	-1.8782	-0.3318	-1.17689	0.387705
5.21667	0.395902	0.178361	1.0941	-0.41984	1.53836	1.36426	1.10639	-0.44525	-0.72885	-1.8982	-0.3218	-0.21689	0.347705
5.23333	0.365902	0.028361	1.1241	-0.47984	1.60836	1.40426	1.12639	-0.31525	-0.71885	-1.8282	-0.3018	0.163115	0.307705
5.25	0.355902	-0.24164	1.1041	-0.36984	1.65836	1.41426	1.15639	-0.29525	-0.69885	-1.6882	-0.2818	0.273115	0.297705
5.26667	0.315902	-0.50164	1.0741	-0.33984	1.68836	1.46426	1.18639	-0.29525	-0.68885	-1.6182	-0.2818	0.343115	0.297705
5.28333	0.105902	-0.63164	1.1041	-0.30984	1.70836	1.50426	1.18639	-0.09525	-0.64885	-1.5682	-0.2818	0.363115	0.287705
5.3	-0.0641	-0.63164	1.2541	-0.25984	1.75836	1.54426	1.16639	-0.01525	-0.47885	-1.5682	-0.2718	0.113115	0.287705
5.31667	0.305902	-0.59164	1.1741	-0.15984	1.88836	1.53426	1.19639	-0.01525	-0.43885	-1.5882	-0.2018	0.153115	0.247705
5.33333	0.405902	-0.51164	1.1141	-0.07984	1.93836	1.59426	1.23639	0.014754	-0.40885	-1.5482	-0.1318	0.273115	0.157705
5.35	0.525902	-0.39164	1.2241	-0.08984	1.95836	1.67426	1.23639	0.014754	-0.36885	-1.5382	-0.1618	0.283115	0.007705
5.36667	0.525902	-0.23164	1.2041	-0.07984	2.01836	1.70426	1.23639	0.084754	-0.40885	-1.5582	-0.3718	0.163115	-0.0223
5.38333	0.495902	-0.24164	1.1241	-0.05984	2.05836	1.69426	1.22639	0.194754	-0.46885	-1.5782	-0.5518	0.143115	-0.0123
5.4	0.955902	-0.13164	1.0641	-0.00984	2.07836	1.61426	1.20639	0.204754	-0.52885	-1.5782	-0.5618	0.123115	0.017705
5.41667	0.995902	0.248361	1.0441	0.080164	2.12836	1.58426	1.23639	0.194754	-0.60885	-1.5682	-0.5718	0.093115	0.177705
5.43333	1.0159	0.478361	1.1241	0.110164	2.15836	1.57426	1.25639	0.134754	-0.75885	-1.5382	-0.5318	0.113115	0.467705
5.45	1.0259	0.448361	1.1441	0.130164	2.18836	1.79426	1.21639	-0.09525	-0.91885	-1.4982	-0.4918	0.123115	0.537705
5.46667	1.0459	0.188361	1.0741	0.160164	2.17836	1.88426	1.14639	-0.59525	-1.22885	-1.4582	-0.5018	0.123115	0.557705
5.48333	1.0659	0.108361	1.0341	0.160164	2.15836	1.96426	1.14639	-0.86525	-1.28885	-1.4182	-0.5718	0.133115	0.567705
5.5	1.1759	0.148361	0.924098	0.140164	2.09836	2.12426	1.16639	-0.93525	-1.25885	-1.3582	-0.6118	0.163115	0.577705
5.51667	1.7559	0.178361	0.804098	0.070164	1.96836	2.28426	1.06639	-0.97525	-1.09885	-1.3582	-0.4918	0.203115	0.557705
5.53333	1.8259	0.218361	0.794098	0.020164	1.86836	2.55426	1.01639	-0.96525	-1.15885	-1.3982	-0.3418	0.203115	0.547705
5.55	1.7159	0.188361	0.894098	0.030164	1.80836	2.57426	1.05639	-1.02525	-1.25885	-1.3582	-0.2418	0.223115	0.557705
5.56667	1.6659	0.178361	1.1541	0.070164	1.68836	2.24426	1.08639	-1.09525	-1.27885	-1.3082	-0.0518	0.243115	0.577705
5.58333	1.6559	0.308361	1.4141	0.080164	1.64836	2.06426	1.06639	-1.20525	-1.25885	-1.3582	0.068197	0.253115	0.547705
5.6	1.6059	0.428361	1.5641	0.050164	1.60836	2.24426	0.916393	-1.00525	-1.20885	-1.4082	0.118197	0.243115	0.497705
5.61667	1.4459	0.538361	1.4541	0.130164	1.65836	2.58426	0.876393	-1.01525	-1.13885	-1.3282	-0.0418	0.243115	0.417705
5.63333	1.4359	0.628361	0.944098	0.400164	1.67836	2.77426	0.896393	-1.09525	-1.14885	-1.0882	-0.3318	0.253115	0.437705
5.65	1.4559	0.748361	0.874098	0.410164	1.64836	2.80426	0.896393	-1.02525	-1.17885	-0.9182	-0.3718	0.263115	0.467705
5.66667	1.0959	0.798361	0.904098	0.200164	1.60836	2.86426	0.836393	-0.95525	-1.15885	-0.8182	-0.3418	0.303115	0.497705
5.68333	0.685902	0.808361	1.0141	0.190164	1.61836	2.93426	0.796393	-0.91525	-1.08885	-0.7482	-0.2718	0.313115	0.497705
5.7	0.905902	0.818361	0.554098	0.240164	1.62836	3.00426	0.866393	-0.90525	-0.97885	-0.6982	-0.2218	0.333115	0.487705
5.71667	1.1459	0.958361	0.324098	0.190164	1.65836	3.13426	0.826393	-0.60525	-0.89885	-0.6482	-0.1818	0.353115	0.467705
5.73333	1.1759	1.15836	0.124098	0.090164	1.66836	3.33426	0.786393	-0.22525	-0.78885	-0.7782	-0.1618	0.353115	0.447705
5.75	1.1559	1.04836	0.024098	0.100164	1.65836	3.40426	0.726393	-0.01525	-0.62885	-0.7882	-0.2018	0.343115	0.377705
5.76667	1.0259	0.888361	0.004098	0.120164	1.66836	3.46426	0.666393	0.184754	-0.61885	-0.7382	-0.1918	0.263115	0.367705
5.78333	0.925902	0.748361	0.004098	0.040164	1.64836	3.51426	0.826393	0.474754	-0.63885	-0.6882	-0.1918	0.273115	0.397705
5.8	0.725902	0.598361	0.054098	0.010164	1.64836	3.58426	0.796393	0.564754	-0.66885	-0.6682	-0.1818	0.323115	0.407705
5.81667	0.795902	0.328361	0.054098	0.020164	1.63836	3.65426	0.726393	0.634754	-0.70885	-0.6782	-0.2118	0.413115	0.427705
5.83333	1.1559	0.318361	0.164098	0.040164	1.67836	3.61426	0.686393	0.724754	-0.74885	-0.7282	-0.2318	0.453115	0.437705
5.85	1.5359	0.298361	0.664098	0.090164	1.70836	3.68426	0.596393	0.764754	-0.79885	-0.7882	-0.1918	0.453115	0.457705
5.86667	1.5259	0.298361	1.0041	0.280164	1.77836	3.71426	0.536393	0.894754	-0.85885	-0.8082	-0.1518	0.453115	0.497705
5.88333	1.3159	0.288361	1.1341	0.390164	1.84836	3.70426	0.496393	1.40475	-0.85885	-0.8282	-0.0818	0.443115	0.527705
5.9	1.1859	0.288361	1.1341	0.290164	1.81836	3.54426	0.576393	1.62475	-0.81885	-0.6382	-0.1418	0.513115	0.527705
5.91667	1.1659	0.268361	0.884098	0.300164	1.81836	3.52426	0.696393	1.60475	-0.77885	-0.5382	-0.3118	0.563115	0.527705
5.93333	1.1059	0.318361	0.754098	0.260164	1.82836	3.26426	0.786393	1.63475	-0.74885	-0.5182	-0.3618	0.593115	0.557705
5.95	0.955902	0.318361	0.814098	0.250164	1.82836	3.12426	0.816393	1.59475	-0.75885	-0.5482	-0.3218	0.633115	0.567705
5.96667	0.825902	0.308361	0.814098	0.220164	1.84836	3.08426	0.836393	1.36475	-0.79885	-0.5982	-0.3218	0.703115	0.547705
5.98333	0.415902	0.268361	0.814098	0.280164	1.87836	2.93426	0.856393	0.874754	-0.98885	-0.5682	-0.2418	0.713115	0.517705
6	0.085902	0.228361	0.864098	0.320164	1.89836	2.56426	0.876393	0.754754	-1.13885	-0.5782	-0.1218	0.683115	0.487705

## Sheet: Tg(Myh11-CreERT2) AMG517
Time	Tg(Myh11-CreERT2)	Tg(Myh11-CreERT2)	Tg(Myh11-CreERT2)	Tg(Myh11-CreERT2)	Tg(Myh11-CreERT2)	Tg(Myh11-CreERT2)	Tg(Myh11-CreERT2);Trpv1fl/fl	Tg(Myh11-CreERT2);Trpv1fl/fl	Tg(Myh11-CreERT2);Trpv1fl/fl	Tg(Myh11-CreERT2);Trpv1fl/fl	Tg(Myh11-CreERT2);Trpv1fl/fl
	S161	T751	U288	U893	U894	U896	S164	S166	T502	T506	T896
-1	-0.47628	-0.23145	0.001585	0.43765	0.135191	0.325683	0.533552	-0.28705	0.036066	-0.50831	0.026393
-0.98333	-0.30295	-0.21145	0.118251	0.450984	0.158525	0.305683	0.523552	-0.27372	0.106066	-0.48497	-0.01027
-0.96667	-0.23628	-0.21145	0.161585	0.62765	0.161858	0.289016	0.536885	-0.29038	0.162732	-0.50164	-0.00027
-0.95	-0.17962	-0.28811	0.154918	0.644317	0.195191	0.275683	0.483552	-0.27372	0.179399	-0.55164	0.026393
-0.93333	-0.10962	-0.34145	0.121585	0.604317	0.205191	0.385683	0.326886	-0.32372	0.116066	-0.55831	0.046393
-0.91667	-0.01628	-0.34811	0.064918	0.59765	0.171858	0.589016	0.263552	-0.33372	-0.0806	-0.54497	0.069727
-0.9	0.013716	-0.33811	0.054918	0.404317	0.141858	0.68235	0.240219	-0.34705	-0.1306	-0.53831	0.119727
-0.88333	0.05705	-0.35811	0.038251	0.11765	0.131858	0.71235	0.163552	-0.35038	-0.1206	-0.51164	0.149727
-0.86667	0.100383	-0.46145	-0.01842	-0.139016	0.141858	0.70235	0.056886	-0.31038	-0.07393	-0.45164	0.156393
-0.85	0.11705	-0.47811	-0.10175	-0.259016	0.151858	0.705683	-0.07978	-0.22705	0.069399	-0.37831	0.136393
-0.83333	0.273716	-0.43145	-0.10175	-0.125683	0.105191	0.719016	-0.26645	-0.14038	0.099399	-0.35831	0.05306
-0.81667	0.453716	-0.45811	-0.07508	0.0243169	0.101858	0.71235	-0.51311	-0.04038	0.132732	-0.31164	-0.01694
-0.8	0.48705	-0.41478	-0.02842	-0.0323497	0.131858	0.729016	-0.60978	0.039617	0.146066	-0.28831	-0.14361
-0.78333	0.43705	-0.30145	0.094918	-0.0423497	0.111858	0.669016	-0.49978	0.066284	0.122732	-0.20831	-0.16361
-0.76667	0.360383	-0.18478	0.131585	-0.115683	0.121858	0.629016	-0.37311	0.052951	0.112732	-0.15831	-0.24027
-0.75	0.343716	-0.15811	0.021585	-0.155683	0.111858	0.61235	-0.31978	0.109617	0.119399	-0.15831	-0.25361
-0.73333	0.35705	-0.14478	-0.19508	-0.205683	0.0718579	0.40235	-0.38311	0.176284	0.052732	-0.34497	-0.16694
-0.71667	0.363716	-0.13145	-0.31508	-0.249016	0.0385246	0.259016	-0.35645	0.076284	-0.03727	-0.38831	-0.17694
-0.7	0.38705	-0.13811	-0.43508	-0.145683	-0.0748087	0.219016	-0.23645	0.136284	-0.02393	-0.35497	-0.16027
-0.68333	0.330383	-0.12478	-0.49175	-0.0323497	-0.138142	0.175683	-0.13645	0.192954	-0.00727	-0.30831	-0.13694
-0.66667	0.17705	-0.14811	-0.45842	0.0543169	-0.158142	-0.10765	-0.09645	0.136284	-0.0306	-0.23831	-0.12361
-0.65	0.143716	-0.15811	-0.39508	0.0809836	-0.118142	-0.20765	-0.01311	0.086284	-0.0506	-0.23497	-0.09694
-0.63333	0.093716	-0.10811	-0.34508	0.0576503	-0.138142	-0.190984	0.063552	-0.01038	-0.07393	-0.26164	-0.03027
-0.61667	0.04705	-0.10478	-0.21175	0.0443169	-0.141475	-0.194317	0.093552	-0.02705	-0.0206	-0.26831	0.029727
-0.6	0.07705	-0.08478	-0.10842	-0.0790164	-0.0681421	-0.15765	0.103552	-0.06705	-0.0206	-0.23164	0.02306
-0.58333	0.07705	-0.04145	-0.04842	-0.0190164	-0.0648087	-0.184317	0.130219	-0.08038	-0.04393	-0.17497	0.039727
-0.56667	0.040383	0.055219	-0.03175	0.26765	-0.0148087	-0.18765	0.130219	0.069617	-0.02727	-0.12164	0.06306
-0.55	0.000383	0.161885	0.014918	0.344317	0.118525	-0.190984	0.113552	0.132951	-0.0506	-0.09164	0.08306
-0.53333	-0.02295	0.221885	0.021585	0.214317	0.0851913	-0.460984	0.106886	0.046284	-0.04727	-0.03831	0.079727
-0.51667	-0.04295	0.265219	-0.00842	0.17765	0.111858	-0.62765	0.070219	-0.02372	-0.00393	0.045027	0.006393
-0.5	-0.05628	0.305219	-0.06175	0.154317	0.0951913	-0.594317	0.033552	-0.07038	0.016066	0.005027	0.029727
-0.48333	0.023716	0.251885	-0.04842	0.0909836	0.0385246	-0.534317	0.003552	-0.11705	-0.0006	-0.05831	0.056393
-0.46667	0.143716	0.171885	-0.03175	-0.0956831	-0.0948087	-0.424317	0.000219	-0.11372	-0.03727	-0.04497	0.029727
-0.45	0.030383	0.231885	-0.00508	-0.27235	-0.141475	-0.30765	0.006886	-0.05372	-0.06727	-0.04164	0.069727
-0.43333	-0.26962	0.218552	-0.01175	-0.309016	-0.0748087	-0.30765	-0.03978	-0.04372	-0.0006	-0.07164	0.139727
-0.41667	-0.39295	0.215219	0.004918	-0.159016	-0.0881421	-0.30765	-0.06645	-0.04038	0.012732	-0.17831	0.21306
-0.4	-0.32628	0.271885	0.044918	0.0609836	-0.0281421	-0.36765	-0.10645	-0.00705	-0.00393	-0.20164	0.346393
-0.38333	-0.15962	0.308552	0.081585	0.0976503	-0.00480874	-0.420984	-0.19645	-0.00372	-0.1106	-0.18497	0.366393
-0.36667	0.050383	0.258552	0.121585	0.00431694	0.0251913	-0.36765	-0.26978	-0.01038	-0.14393	-0.19497	0.356393
-0.35	0.050383	0.225219	0.134918	-0.185683	0.0151913	-0.314317	-0.24645	-0.04372	-0.04727	-0.09831	0.36306
-0.33333	0.05705	0.155219	0.154918	-0.365683	-0.00147541	-0.17765	-0.24645	-0.03038	-0.0206	0.281694	0.40306
-0.31667	-0.01628	0.118552	0.181585	-0.505683	-0.128142	-0.0643169	-0.22645	0.042951	-0.04727	0.451694	0.46306
-0.3	-0.05962	0.151885	0.191585	-0.469016	-0.0181421	-0.0643169	-0.24645	0.069617	-0.10727	0.551694	0.526393
-0.28333	0.060383	0.171885	0.171585	-0.305683	0.0185246	-0.0843169	-0.29978	0.129617	-0.14727	0.578361	0.556393
-0.26667	0.093716	0.238552	0.181585	-0.19235	0.00519126	-0.0843169	-0.20645	0.156284	-0.1406	0.618361	0.456393
-0.25	0.05705	0.371885	0.248251	-0.159016	-0.0214754	-0.0876503	0.063552	0.166284	-0.12727	0.625027	0.32306
-0.23333	0.02705	0.395219	0.314918	-0.12235	-0.0814754	-0.11765	0.023552	0.206284	-0.12393	0.611694	0.206393
-0.21667	0.000383	0.405219	0.371585	-0.0223497	-0.131475	-0.22765	-0.07645	0.249614	-0.13727	0.551694	0.089727
-0.2	-0.09962	0.415219	0.388251	0.23765	-0.184809	-0.35765	-0.04645	0.242954	-0.13393	0.521694	-0.04694
-0.18333	-0.27962	0.391885	0.401585	0.274317	-0.191475	-0.360984	0.003552	0.186284	-0.04727	0.435027	-0.14027
-0.16667	-0.38628	0.261885	0.394918	0.23765	-0.184809	-0.36765	0.023552	0.082951	0.016066	0.525027	-0.16361
-0.15	-0.47628	0.008552	0.378251	0.19765	-0.121475	-0.144317	0.086886	0.082951	0.066066	0.545027	-0.19694
-0.13333	-0.32962	-0.06811	0.204918	0.10765	-0.0581421	-0.0309836	0.163552	0.126284	0.079399	0.495027	-0.24361
-0.11667	-0.29628	-0.09811	0.034918	0.0909836	-0.0581421	-0.0676503	0.120219	0.172951	0.096066	0.385027	-0.27694
-0.1	-0.27962	-0.09811	-0.12508	0.0809836	-0.0614754	-0.0976503	0.110219	0.159617	0.142732	0.398361	-0.32361
-0.08333	-0.11628	-0.07811	-0.18508	-0.0890164	-0.00814208	-0.12765	0.156886	0.136284	0.132732	0.545027	-0.43694
-0.06667	-0.14628	-0.09145	-0.18508	-0.209016	-0.0248087	-0.174317	0.230219	0.146284	0.129399	0.575027	-0.48027
-0.05	-0.10628	-0.03811	-0.20842	-0.365683	-0.0581421	-0.22765	0.290219	0.172951	0.102732	0.571694	-0.51361
-0.03333	-0.11962	0.038552	-0.23175	-0.475683	-0.108142	-0.210984	0.320219	0.082951	0.062732	0.578361	-0.52027
-0.01667	-0.07295	0.138552	-0.27175	-0.46235	-0.0748087	-0.25765	0.303552	0.039617	-0.0106	0.455027	-0.53027
0	0.043716	0.446885	-0.27175	-0.419016	-0.0381421	-0.310984	0.276886	-0.03372	-0.01393	0.295027	-0.51027
0.016667	0.080383	0.441885	-0.21175	-0.389016	-0.118142	-0.260984	0.180219	-0.11705	-0.0306	0.211694	-0.50027
0.033333	0.033716	0.445219	-0.18175	-0.499016	-0.461475	-0.16765	0.093552	-0.17038	-0.1306	-0.00164	-0.44361
0.05	0.053716	-0.20478	-0.17508	-0.219016	-0.564809	-0.244317	0.043552	-0.21372	-0.2406	-0.02164	-0.46694
0.066667	-0.04295	-0.33145	-0.14508	-0.165683	-0.528142	-0.224317	-0.01311	-0.24705	-0.35727	0.285027	-0.27361
0.083333	-0.11628	-0.49478	-0.14175	-0.129016	-0.354809	-0.110984	-0.13645	-0.50038	0.262732	0.411694	-0.76361
0.1	-0.18295	-0.60145	-0.51175	0.000983607	-0.601475	-0.414317	-0.22645	-0.02038	0.192732	0.288361	-0.85694
0.116667	-0.29962	-0.63145	0.111585	0.0443169	-0.628142	-0.294317	-0.22311	-0.07038	-0.06393	0.251694	-0.87361
0.133333	-0.14295	-0.60145	0.124918	0.17765	-0.574809	-0.290984	-0.13311	-0.10038	-0.2706	0.418361	-0.91694
0.15	0.063716	-0.54478	0.134918	0.184317	-0.544809	-0.51765	-0.14645	-0.02372	-0.4006	0.481694	-0.92694
0.166667	0.290383	-0.64478	0.261585	0.304317	-0.444809	-0.364317	-0.16311	0.242954	-0.3206	0.135027	-1.16361
0.183333	0.440383	-0.53145	0.361585	0.474317	-0.188142	0.109016	-0.00978	0.382954	-0.2606	0.071694	-1.25361
0.2	0.34705	-0.49811	0.314918	0.524317	-0.0881421	0.429016	0.243552	0.522954	-0.2306	0.048361	-0.98694
0.216667	0.12705	-0.14811	0.288251	0.424317	-0.0681421	0.459016	0.393552	0.429614	-0.09727	0.028361	-0.63361
0.233333	-0.17962	0.008552	0.408251	0.204317	-0.00814208	0.499016	0.643552	0.266284	-0.1806	-0.02831	-0.39027
0.25	-0.19628	-0.14145	0.498251	0.244317	-0.0248087	0.189016	0.723552	0.382954	-0.26727	0.258361	-0.23027
0.266667	-0.02628	-0.22145	0.328251	0.290984	-0.0448087	0.17235	0.576886	0.432954	-0.3306	0.551694	-0.04361
0.283333	-0.07295	-0.12811	0.324918	0.304317	-0.0781421	0.339016	0.620219	0.476284	-0.43727	0.701694	-0.01361
0.3	-0.18962	0.021885	0.304918	0.434317	0.0451913	0.499016	0.793552	0.499614	-0.36393	0.718361	-0.00027
0.316667	-0.17962	0.211885	0.238251	0.770984	0.185191	0.509016	0.883552	0.639614	-0.24393	0.795027	0.019727
0.333333	-0.05295	0.361885	0.304918	0.790984	0.125191	0.44235	0.883552	0.686284	-0.20727	0.885027	0.02306
0.35	-0.10962	0.505219	0.404918	0.56765	0.125191	0.345683	0.920219	0.692954	-0.34727	0.845027	0.05306
0.366667	-0.05962	0.645219	0.438251	0.490984	0.155191	0.34235	0.930219	0.416284	-0.4106	0.775027	0.10306
0.383333	0.123716	0.655219	0.418251	0.370984	0.118525	0.35235	0.916886	0.296284	-0.30393	0.775027	0.21306
0.4	0.250383	0.651885	0.474918	0.114317	0.128525	0.40235	1.07689	0.239614	-0.28393	0.845027	0.47306
0.416667	0.183716	0.571885	0.548251	0.0543169	0.165191	0.75235	1.12022	0.056284	-0.2506	0.811694	0.54306
0.433333	0.050383	0.401885	0.501585	0.0943169	0.385191	0.88235	1.11689	0.066284	-0.15727	0.785027	0.516393
0.45	0.080383	0.308552	0.481585	0.210984	0.405191	0.775683	1.00689	0.306284	0.089399	0.731694	0.64306
0.466667	0.010383	0.231885	0.554918	0.44765	0.295191	0.589016	0.933552	0.316284	0.306066	0.611694	0.77306
0.483333	0.073716	0.261885	0.531585	0.614317	0.205191	0.675683	0.910219	0.266284	0.412732	0.561694	0.80306
0.5	0.273716	0.308552	0.444918	0.614317	0.138525	0.815683	1.02022	0.272954	0.562732	0.495027	0.81306
0.516667	0.413716	0.280219	0.308251	0.59765	0.271858	0.999016	0.910219	0.152951	0.469399	0.535027	0.84306
0.533333	0.323716	0.335219	0.194918	0.560984	0.375191	1.02568	0.783552	0.016284	0.219399	0.571694	0.86306
0.55	0.243716	0.485219	0.194918	0.29765	0.401858	1.02902	0.563552	-0.00705	-0.06727	0.608361	0.856393
0.566667	0.20705	0.428552	0.278251	0.0776503	0.305191	1.06568	0.510219	-0.15705	-0.19727	0.551694	0.826393
0.583333	0.280383	0.401885	0.348251	-0.0556831	0.181858	1.10902	0.400219	-0.23372	-0.25727	0.435027	0.85306
0.6	0.500383	0.418552	0.404918	-0.0990164	0.165191	1.09235	0.363552	-0.10372	-0.17727	0.445027	0.869727
0.616667	0.670383	0.395219	0.441585	0.0609836	0.265191	1.12902	0.376885	0.206284	-0.04727	0.525027	0.819727
0.633333	0.790383	0.321885	0.498251	0.0743169	0.268525	1.33568	0.473552	0.059617	0.062732	0.601694	0.836393
0.65	0.743716	0.331885	0.514918	0.0409836	0.175191	1.44235	0.536885	-0.00372	0.062732	0.661694	0.87306
0.666667	0.57705	0.361885	0.528251	0.114317	0.128525	1.49568	0.400219	0.026284	-0.0206	0.741694	0.946393
0.683333	0.49705	0.348552	0.531585	0.170984	0.145191	1.45568	0.306886	0.099617	-0.02727	0.711694	0.97306
0.7	0.56705	0.325219	0.518251	0.0909836	0.118525	1.40568	0.283552	0.139617	0.029399	0.621694	0.996393
0.716667	0.663716	0.305219	0.474918	0.0376503	0.0218579	1.37902	0.373552	0.112951	0.132732	0.485027	1.02973
0.733333	0.68705	0.345219	0.388251	-0.0723497	-0.0314754	1.35568	0.410219	0.159617	0.199399	0.431694	1.03973
0.75	0.71705	0.398552	0.301585	-0.119016	-0.0248087	1.34902	0.446885	0.199614	0.216066	0.435027	1.00306
0.766667	0.75705	0.368552	0.281585	0.204317	-0.0781421	1.25235	0.480219	0.199614	0.362732	0.495027	0.929727
0.783333	0.79705	0.355219	0.304918	0.434317	-0.121475	1.09568	0.486885	0.129617	0.399399	0.621694	0.929727
0.8	0.830383	0.395219	0.248251	0.674317	-0.104809	1.01568	0.590219	0.122951	0.312732	0.611694	0.916393
0.816667	0.880383	0.441885	0.208251	0.814317	-0.144809	0.935683	0.696886	0.122951	0.269399	0.638361	0.84306
0.833333	0.903713	0.448552	0.204918	0.720984	-0.181475	0.84235	0.740219	0.156284	0.242732	0.691694	0.806393
0.85	0.903713	0.428552	0.231585	0.670984	-0.218142	0.73235	0.766886	0.246284	0.236066	0.885027	0.859727
0.866667	0.897053	0.415219	0.308251	0.72765	-0.204809	0.665683	0.770219	0.306284	0.156066	0.931694	0.876393
0.883333	0.880383	0.445219	0.441585	0.74765	-0.148142	0.68235	0.723552	0.332954	0.092732	0.851694	0.87306
0.9	0.843713	0.425219	0.581585	0.774317	-0.141475	0.71235	0.666886	0.369614	0.082732	0.815027	0.826393
0.916667	0.820383	0.411885	0.674918	0.710984	-0.131475	0.75235	0.660219	0.419614	0.082732	0.818361	0.78306
0.933333	0.783716	0.421885	0.748251	0.684317	-0.0814754	0.77235	0.630219	0.492954	0.012732	0.855027	0.726393
0.95	0.783716	0.415219	0.764918	0.630984	0.0385246	0.61235	0.606886	0.576284	-0.05393	0.858361	0.659727
0.966667	0.710383	0.381885	0.738251	0.624317	0.0518579	0.56235	0.680219	0.552954	-0.08727	0.818361	0.60306
0.983333	0.690383	0.398552	0.704918	0.61765	0.0418579	0.50235	0.536885	0.576284	-0.08727	0.821694	0.536393
1	0.633716	0.425219	0.654918	0.684317	0.0351913	0.47235	0.546885	0.592954	-0.10393	0.868361	0.549727
1.01667	0.570383	0.438552	0.611585	0.670984	0.0151913	0.549016	0.593552	0.622954	-0.0706	0.795027	0.53306
1.03333	0.570383	0.445219	0.604918	0.620984	0.0251913	0.639016	0.703552	0.709614	0.056066	0.681694	0.51306
1.05	0.600383	0.461885	0.651585	0.534317	0.0451913	0.599016	0.833552	0.766284	0.082732	0.611694	0.509727
1.06667	0.643716	0.435219	0.741585	0.754317	0.0451913	0.695683	0.906886	0.799614	0.072732	0.455027	0.506393
1.08333	0.680383	0.408552	0.818251	0.934317	0.0651913	1.06568	0.876886	0.872954	0.116066	0.451694	0.58306
1.1	0.690383	0.395219	0.844918	0.844317	0.0785246	1.11902	0.840219	0.909614	0.172732	0.441694	0.666393
1.11667	0.670383	0.398552	0.864918	0.80765	0.0451913	1.09568	0.853552	0.989614	0.209399	0.431694	0.75306
1.13333	0.603716	0.438552	0.861585	0.93765	0.0185246	1.25902	0.906886	1.05961	0.289399	0.381694	0.766393
1.15	0.55705	0.475219	0.831585	0.76765	0.0218579	1.25568	0.923552	1.09295	0.352732	0.321694	0.76306
1.16667	0.513716	0.505219	0.788251	0.474317	0.0685246	1.10568	0.956886	1.13628	0.336066	0.295027	0.769727
1.18333	0.49705	0.535219	0.708251	0.51765	0.0951913	1.16235	1.03689	1.15628	0.332732	0.295027	0.779727
1.2	0.46705	0.491885	0.591585	0.524317	0.0951913	1.17902	1.11689	1.13961	0.359399	0.355027	0.769727
1.21667	0.40705	0.505219	0.494918	0.540984	0.0585246	1.27235	1.12355	1.11628	0.469399	0.378361	0.779727
1.23333	0.403716	0.528552	0.398251	0.55765	0.0718579	1.43902	1.15022	1.10295	0.576066	0.358361	0.769727
1.25	0.463716	0.515219	0.358251	0.57765	0.135191	1.46568	1.15355	1.08295	0.576066	0.301694	0.736393
1.26667	0.66705	0.468552	0.344918	0.614317	0.158525	1.47902	1.22689	1.08961	0.552732	0.265027	0.679727
1.28333	0.663716	0.455219	0.491585	0.68765	0.271858	1.42235	1.35689	1.17295	0.539399	0.321694	0.656393
1.3	0.640383	0.438552	0.628251	0.710984	0.331858	1.28568	1.42689	1.20961	0.542732	0.348361	0.646393
1.31667	0.66705	0.415219	0.681585	0.85765	0.335191	0.98235	1.46689	1.18628	0.559399	0.348361	0.65306
1.33333	0.72705	0.421885	0.691585	0.90765	0.288525	0.829016	1.60022	1.21295	0.449399	0.351694	0.60306
1.35	0.723716	0.445219	0.681585	0.884317	0.295191	0.725683	1.67355	1.28628	0.426066	0.321694	0.58306
1.36667	0.690383	0.425219	0.661585	0.86765	0.338525	0.615683	1.68689	1.20628	0.469399	0.308361	0.586393
1.38333	0.713716	0.405219	0.688251	0.904317	0.365191	0.595683	1.50022	1.15295	0.492732	0.301694	0.619727
1.4	0.760383	0.348552	0.701585	0.97765	0.385191	0.599016	1.39689	1.12295	0.502732	0.275027	0.656393
1.41667	0.730383	0.291885	0.741585	1.10765	0.345191	0.62235	1.37355	1.17295	0.526066	0.268361	0.676393
1.43333	0.693716	0.258552	0.778251	1.11098	0.218525	0.625683	1.33689	1.18295	0.616066	0.281694	0.68306
1.45	0.66705	0.231885	0.808251	1.13098	0.0751913	0.65235	1.38355	1.18961	0.662732	0.345027	0.659727
1.46667	0.62705	0.221885	0.788251	1.16765	-0.0448087	0.68235	1.54022	1.20961	0.676066	0.481694	0.67306
1.48333	0.60705	0.208552	0.758251	1.18765	-0.0448087	0.63235	1.66022	1.21295	0.682732	0.485027	0.68306
1.5	0.563716	0.245219	0.724918	1.08765	-0.0814754	0.519016	1.72689	1.16295	0.666066	0.525027	0.679727
1.51667	0.483716	0.308552	0.708251	0.98765	-0.104809	0.42235	1.71022	1.07295	0.576066	0.511694	0.646393
1.53333	0.44705	0.308552	0.671585	0.920984	0.0285246	0.379016	1.74689	1.08295	0.489399	0.498361	0.696393
1.55	0.52705	0.271885	0.631585	0.810984	0.0118579	0.41235	1.93689	1.08628	0.382732	0.461694	0.766393
1.56667	0.503716	0.251885	0.611585	0.724317	0.0151913	0.535683	2.00022	1.09628	0.309399	0.418361	0.789727
1.58333	0.413716	0.251885	0.674918	0.60765	-0.0848087	0.399016	2.11689	1.08295	0.262732	0.355027	0.78306
1.6	0.380383	0.198552	0.711585	0.36765	-0.184809	0.295683	2.15689	1.09961	0.252732	0.335027	0.709727
1.61667	0.360383	0.138552	0.724918	0.264317	-0.208142	0.289016	2.08355	1.15295	0.249399	0.348361	0.686393
1.63333	0.323716	0.138552	0.674918	0.374317	-0.181475	0.325683	1.91689	1.09628	0.262732	0.315027	0.656393
1.65	0.313716	0.161885	0.628251	0.58765	-0.178142	0.329016	1.87689	0.999614	0.296066	0.325027	0.62306
1.66667	0.31705	0.238552	0.631585	0.860984	-0.184809	0.32235	1.89022	0.979614	0.316066	0.388361	0.606393
1.68333	0.310383	0.251885	0.644918	1.01765	-0.0714754	0.295683	1.85022	1.03628	0.332732	0.468361	0.589727
1.7	0.333716	0.271885	0.624918	1.10432	0.0618579	0.34235	1.76022	1.04295	0.336066	0.531694	0.57306
1.71667	0.26705	0.298552	0.588251	1.18765	0.291858	0.435683	1.73355	1.09628	0.306066	0.538361	0.556393
1.73333	0.123716	0.271885	0.631585	1.29765	0.415191	0.525683	1.73689	1.15295	0.116066	0.461694	0.536393
1.75	0.073716	0.251885	0.691585	1.34432	0.415191	0.62235	1.58689	1.17628	0.099399	0.355027	0.516393
1.76667	0.033716	0.218552	0.774918	1.49432	0.375191	0.71235	1.48689	1.15295	0.276066	0.265027	0.519727
1.78333	0.010383	0.211885	0.828251	1.60098	0.375191	0.725683	1.49022	1.15295	0.252732	0.228361	0.54306
1.8	-0.07295	0.165219	0.821585	1.66098	0.291858	0.75235	1.33355	1.17295	0.166066	0.291694	0.57306
1.81667	-0.19295	0.185219	0.824918	1.69098	0.305191	0.749016	1.21355	1.13295	0.112732	0.405027	0.599727
1.83333	-0.19295	0.238552	0.811585	1.56765	0.308525	0.629016	1.17689	1.11961	0.059399	0.485027	0.59306
1.85	-0.18628	0.275219	0.784918	1.46432	0.231858	0.589016	1.20689	1.14628	-0.07393	0.541694	0.576393
1.86667	-0.13295	0.303552	0.774918	1.42765	0.115191	0.459016	1.20689	1.13295	-0.1706	0.585027	0.60306
1.88333	-0.05295	0.356885	0.724918	1.38765	0.0918579	0.359016	1.16022	1.10628	-0.16727	0.548361	0.77306
1.9	0.160383	0.375219	0.671585	1.25098	0.0918579	0.375683	1.14355	0.986284	-0.1206	0.401694	0.81306
1.91667	0.203716	0.401885	0.651585	1.12098	0.0718579	0.43235	1.04689	0.959614	-0.0506	0.311694	0.81306
1.93333	0.213716	0.385219	0.621585	1.26432	0.0718579	0.29235	0.833552	0.899614	0.016066	0.191694	0.809727
1.95	0.210383	0.281885	0.598251	1.34432	0.0618579	0.179016	0.690219	0.912954	0.086066	0.098361	0.719727
1.96667	0.16705	0.255219	0.588251	1.35765	0.0651913	0.14235	0.540219	1.02628	0.202732	0.081694	0.639727
1.98333	0.143716	0.368552	0.584918	1.28098	0.0885246	0.14235	0.596886	1.02628	0.359399	0.085027	0.639727
2	0.143716	0.445219	0.551585	1.28432	0.131858	0.11235	0.790219	1.07295	0.442732	0.115027	0.63306
2.01667	0.153716	0.511885	0.531585	1.30432	0.155191	-0.0943169	0.903552	1.21961	0.409399	0.145027	0.63306
2.03333	0.13705	0.438552	0.521585	1.27765	0.108525	-0.240984	0.873552	1.29628	0.352732	0.165027	0.639727
2.05	0.120383	0.351885	0.504918	1.18765	-0.0481421	-0.24765	0.826886	1.37961	0.442732	0.175027	0.599727
2.06667	0.113716	0.248552	0.474918	1.11098	-0.0914754	-0.120984	0.810219	1.43295	0.456066	0.191694	0.579727
2.08333	0.123716	0.141885	0.461585	1.08098	-0.0414754	0.0623497	0.863552	1.43295	0.462732	0.205027	0.606393
2.1	0.130383	0.081885	0.421585	1.06765	0.00185792	0.0756831	1.05689	1.42961	0.512732	0.215027	0.636393
2.11667	0.11705	0.091885	0.371585	1.05098	0.00519126	0.0990164	1.11355	1.35628	0.496066	0.208361	0.656393
2.13333	0.06705	0.128552	0.344918	0.940984	-0.0181421	0.19235	1.06689	1.24295	0.429399	0.171694	0.66306
2.15	0.043716	0.041885	0.318251	0.770984	0.0651913	0.239016	1.11355	1.12961	0.482732	0.141694	0.64306
2.16667	0.040383	-0.00145	0.251585	0.72765	0.115191	0.355683	1.32689	1.04961	0.626066	0.125027	0.62306
2.18333	-0.12295	0.075219	0.111585	0.724317	0.118525	0.435683	1.37689	1.03961	0.609399	0.135027	0.656393
2.2	-0.15295	0.218552	0.084918	0.680984	0.145191	0.385683	1.38022	0.996284	0.552732	0.158361	0.679727
2.21667	-0.05628	0.605219	0.048251	0.624317	0.158525	0.349016	1.58689	0.962954	0.539399	0.178361	0.65306
2.23333	-0.00295	0.775219	-0.04508	0.634317	0.175191	0.249016	1.66022	0.922954	0.502732	0.255027	0.60306
2.25	0.110383	0.715219	-0.10175	0.590984	0.191858	0.25235	1.55689	0.939614	0.466066	0.371694	0.586393
2.26667	0.253716	0.555219	-0.15175	0.53765	0.205191	0.199016	1.50022	0.942954	0.526066	0.395027	0.60306
2.28333	0.33705	0.338552	-0.21842	0.454317	0.251858	0.239016	1.41355	0.946284	0.629399	0.448361	0.646393
2.3	0.360383	0.358552	-0.25175	0.360984	0.325191	0.339016	1.39355	0.939614	0.662732	0.468361	0.659727
2.31667	0.35705	0.421885	-0.25842	0.274317	0.375191	0.429016	1.53689	0.922954	0.729399	0.501694	0.69306
2.33333	0.353716	0.395219	-0.24842	0.240984	0.371858	0.415683	1.54355	0.856284	0.689399	0.565027	0.75306
2.35	0.31705	0.371885	-0.22842	0.19765	0.428525	0.339016	1.54355	0.766284	0.642732	0.605027	0.839727
2.36667	0.25705	0.395219	-0.15508	0.120984	0.498525	0.395683	1.44689	0.759614	0.672732	0.631694	0.886393
2.38333	0.193716	0.401885	-0.13508	0.204317	0.525191	0.595683	1.42022	0.739614	0.782732	0.685027	0.929727
2.4	0.243716	0.435219	-0.07175	0.220984	0.461858	0.549016	1.35689	0.762954	0.829399	0.695027	0.959727
2.41667	0.233716	0.468552	-0.06175	0.250984	0.421858	0.525683	1.33689	0.759614	0.976066	0.678361	0.99306
2.43333	0.14705	0.448552	-0.05175	0.39765	0.398525	0.485683	1.37022	0.709614	1.01273	0.698361	1.03306
2.45	0.183716	0.431885	-0.03508	0.42765	0.375191	0.485683	1.42355	0.662954	0.906066	0.738361	1.04973
2.46667	0.210383	0.405219	0.031585	0.340984	0.375191	0.57235	1.53355	0.596284	0.772732	0.775027	1.07973
2.48333	0.220383	0.325219	0.228251	0.33765	0.345191	0.805683	1.64022	0.462954	0.816066	0.805027	1.08306
2.5	0.223716	0.298552	0.321585	0.220984	0.288525	1.03568	1.70689	0.372954	0.799399	0.855027	1.08973
2.51667	0.210383	0.365219	0.381585	0.0576503	0.271858	1.17902	1.69355	0.452954	0.746066	0.845027	1.10306
2.53333	0.170383	0.361885	0.394918	-0.129016	0.311858	1.20568	1.54022	0.626284	0.676066	0.808361	1.09306
2.55	0.12705	0.361885	0.318251	-0.21235	0.308525	1.11568	1.41689	0.662954	0.669399	0.838361	1.12306
2.56667	0.13705	0.281885	0.218251	-0.269016	0.268525	0.855683	1.33689	0.649614	0.646066	0.891694	1.15639
2.58333	0.110383	0.325219	0.401585	-0.359016	0.241858	0.779016	1.39355	0.599614	0.532732	0.888361	1.12639
2.6	0.163716	0.381885	0.634918	-0.399016	0.238525	0.735683	1.46355	0.549614	0.576066	0.898361	1.03973
2.61667	0.220383	0.358552	0.918251	-0.43235	0.255191	0.735683	1.39022	0.596284	0.646066	0.868361	1.06306
2.63333	0.190383	0.358552	1.08825	-0.449016	0.265191	0.719016	1.36689	0.599614	0.692732	0.818361	1.18639
2.65	0.210383	0.411885	1.09492	-0.41235	0.285191	0.785683	1.36022	0.502954	0.739399	0.795027	1.16306
2.66667	0.200383	0.395219	0.998251	-0.37235	0.291858	0.779016	1.34355	0.462954	0.776066	0.811694	1.12306
2.68333	0.200383	0.375219	0.914918	-0.389016	0.281858	0.80235	1.36022	0.509614	0.816066	0.751694	1.09306
2.7	0.233716	0.381885	0.911585	-0.26235	0.231858	0.809016	1.31689	0.586284	0.836066	0.678361	1.06973
2.71667	0.173716	0.461885	0.894918	-0.209016	0.185191	0.729016	1.31355	0.639614	0.879399	0.738361	1.10306
2.73333	0.250383	0.558552	0.921585	-0.169016	0.241858	0.69235	1.38355	0.676284	0.942732	0.758361	1.12306
2.75	0.390383	0.528552	1.05492	0.0143169	0.338525	0.555683	1.38689	0.699614	0.899399	0.738361	1.18973
2.76667	0.440383	0.551885	1.07492	0.410984	0.381858	0.28235	1.36022	0.709614	0.749399	0.711694	1.24973
2.78333	0.390383	0.535219	1.00158	0.65765	0.478525	0.00234973	1.33022	0.692954	0.692732	0.668361	1.35973
2.8	0.453716	0.375219	0.951585	0.790984	0.565191	-0.210984	1.29022	0.666284	0.636066	0.628361	1.47639
2.81667	0.34705	0.245219	0.884918	0.92765	0.601858	-0.264317	1.25689	0.642954	0.412732	0.608361	1.53639
2.83333	0.363716	0.275219	0.791585	1.05098	0.595191	-0.254317	1.25689	0.629614	0.292732	0.645027	1.56306
2.85	0.36705	0.295219	0.781585	1.11765	0.528525	-0.22765	1.27689	0.599614	0.226066	0.588361	1.40973
2.86667	0.330383	0.085219	0.768251	1.00765	0.475191	-0.220984	1.33022	0.569614	0.136066	0.505027	1.27973
2.88333	0.283716	-0.00811	0.714918	1.04765	0.461858	-0.234317	1.31355	0.592954	0.072732	0.455027	1.21306
2.9	0.15705	0.313552	0.631585	1.06765	0.398525	-0.23765	1.25355	0.636284	0.059399	0.508361	1.11639
2.91667	-0.06628	0.305219	0.554918	0.86765	0.318525	-0.30765	1.23355	0.666284	0.056066	0.521694	1.02306
2.93333	-0.09628	0.346885	0.488251	0.764317	0.395191	-0.344317	1.21355	0.659614	0.072732	0.495027	0.869727
2.95	-0.09295	0.395219	0.428251	0.54765	0.488525	-0.324317	1.10689	0.659614	0.099399	0.465027	0.766393
2.96667	0.04705	0.105219	0.384918	0.48765	0.655191	-0.33765	1.04022	0.689614	0.079399	0.415027	0.659727
2.98333	0.11705	0.188552	0.318251	0.564317	0.671858	-0.37765	1.05689	0.669614	0.076066	0.238361	0.599727
3	0.330383	0.228552	0.284918	0.514317	0.575191	-0.33765	1.13022	0.486284	0.159399	0.171694	0.506393
3.01667	0.383716	0.231885	0.258251	0.464317	0.425191	-0.140984	1.10022	0.416284	0.242732	0.248361	0.336393
3.03333	0.273716	0.265219	0.251585	0.47765	0.371858	-0.0876503	1.09355	0.402954	0.286066	0.328361	0.15306
3.05	0.220383	0.245219	0.278251	0.450984	0.321858	-0.0243169	1.04355	0.346284	0.366066	0.418361	0.136393
3.06667	0.18705	0.218552	0.368251	0.37765	0.275191	-0.0809836	1.04022	0.292954	0.402732	0.485027	0.249727
3.08333	0.230383	0.225219	0.438251	0.264317	0.0685246	-0.12765	1.02355	0.216284	0.309399	0.455027	0.306393
3.1	0.28705	0.248552	0.474918	0.17765	-0.101475	-0.184317	0.970219	0.079617	0.246066	0.408361	0.209727
3.11667	0.29705	0.281885	0.504918	0.190984	0.00519126	0.0256831	0.963552	-0.18372	0.229399	0.501694	0.196393
3.13333	0.230383	0.298552	0.551585	0.184317	0.138525	0.135683	0.983552	-0.23705	0.212732	0.575027	0.28306
3.15	0.20705	0.211885	0.604918	0.174317	0.231858	0.125683	0.996886	-0.24038	0.239399	0.658361	0.30306
3.16667	0.003716	0.185219	0.638251	0.18765	0.145191	0.11235	1.01022	-0.26705	0.276066	0.718361	0.23306
3.18333	-0.03628	0.198552	0.681585	0.210984	0.0951913	0.159016	1.10689	-0.28705	0.239399	0.755027	0.16306
3.2	-0.02962	0.221885	0.728251	0.200984	0.285191	0.15235	1.19022	-0.24038	0.266066	0.711694	0.046393
3.21667	-0.02295	0.248552	0.728251	0.104317	0.408525	0.00901639	1.28689	-0.23705	0.366066	0.741694	0.006393
3.23333	-0.01628	0.225219	0.734918	0.0676503	0.445191	-0.0243169	1.30689	-0.25038	0.489399	0.695027	-0.03694
3.25	-0.00628	0.108552	0.781585	0.0109836	0.518525	0.0956831	1.29022	-0.27372	0.599399	0.571694	-0.04694
3.26667	-0.02295	-0.02478	0.794918	-0.13235	0.531858	0.239016	1.28689	-0.30038	0.662732	0.605027	-0.09027
3.28333	-0.07628	-0.04478	0.761585	-0.15235	0.491858	0.259016	1.27355	-0.28038	0.652732	0.685027	-0.10694
3.3	-0.11628	0.011885	0.761585	-0.0190164	0.455191	0.32235	1.27022	-0.19705	0.672732	0.748361	-0.07027
3.31667	-0.10295	0.011885	0.751585	0.0209836	0.428525	0.365683	1.21022	-0.20372	0.622732	0.828361	-0.08694
3.33333	-0.09962	-0.08811	0.718251	0.0509836	0.408525	0.33235	1.19355	-0.21038	0.596066	0.845027	-0.06027
3.35	-0.09295	-0.07478	0.648251	0.0476503	0.371858	0.175683	1.18689	-0.18372	0.536066	0.861694	-0.04694
3.36667	-0.10295	-0.05478	0.558251	-0.0223497	0.321858	0.0990164	1.21022	-0.15038	0.526066	0.938361	0.03306
3.38333	-0.11628	-0.16145	0.518251	-0.11235	0.278525	0.10235	1.21022	-0.20038	0.579399	0.985027	0.146393
3.4	-0.05962	-0.13811	0.518251	-0.149016	0.285191	0.119016	1.20022	-0.31372	0.509399	1.00503	0.25306
3.41667	-0.08628	0.088552	0.541585	-0.155683	0.315191	0.0623497	1.20689	-0.29705	0.446066	0.958361	0.26306
3.43333	-0.08962	0.238552	0.544918	-0.175683	0.461858	-0.0309836	1.26355	-0.29705	0.469399	0.911694	0.216393
3.45	-0.10628	0.321885	0.578251	-0.229016	0.498525	-0.0676503	1.26355	-0.29372	0.479399	0.771694	0.16306
3.46667	-0.20962	0.365219	0.601585	-0.299016	0.528525	-0.0476503	1.28689	-0.30705	0.466066	0.665027	0.16306
3.48333	-0.30295	0.388552	0.591585	-0.339016	0.491858	0.0356831	1.31355	-0.35038	0.486066	0.618361	0.189727
3.5	-0.24962	0.398552	0.588251	-0.37235	0.508525	0.129016	1.30355	-0.38705	0.519399	0.585027	0.226393
3.51667	-0.12962	0.395219	0.518251	-0.379016	0.568525	0.215683	1.20355	-0.39372	0.449399	0.578361	0.226393
3.53333	-0.11295	0.381885	0.548251	-0.415683	0.551858	0.349016	1.14022	-0.47705	0.322732	0.601694	0.19306
3.55	-0.08962	0.368552	0.541585	-0.51235	0.365191	0.475683	1.08689	-0.71038	0.136066	0.638361	0.18306
3.56667	-0.08962	0.341885	0.364918	-0.599016	0.341858	0.555683	1.30355	-0.78705	0.056066	0.695027	0.239727
3.58333	-0.12962	0.325219	0.271585	-0.605683	0.425191	0.61235	1.43689	-0.85705	0.082732	0.691694	0.30306
3.6	-0.26295	0.328552	0.248251	-0.565683	0.468525	0.61235	1.49022	-0.81038	0.139399	0.681694	0.349727
3.61667	-0.27962	0.365219	0.234918	-0.445683	0.441858	0.61235	1.53689	-0.66705	0.212732	0.708361	0.356393
3.63333	-0.27295	0.395219	0.261585	-0.299016	0.411858	0.60235	1.64689	-0.66372	0.219399	0.741694	0.38306
3.65	-0.27628	0.365219	0.408251	-0.245683	0.401858	0.679016	1.70689	-0.67705	0.196066	0.755027	0.43306
3.66667	-0.27295	0.325219	0.418251	-0.279016	0.361858	0.77235	1.70022	-0.64038	0.162732	0.745027	0.49306
3.68333	-0.26295	0.351885	0.378251	-0.319016	0.345191	0.86235	1.46689	-0.68372	0.149399	0.765027	0.519727
3.7	-0.24628	0.351885	0.341585	-0.245683	0.311858	0.839016	1.44022	-0.71372	0.169399	0.808361	0.49306
3.71667	-0.22962	0.298552	0.328251	-0.105683	0.195191	0.899016	1.45355	-0.74372	0.316066	0.848361	0.476393
3.73333	-0.20295	0.228552	0.338251	-0.0723497	0.158525	0.999016	1.47689	-0.66705	0.492732	0.818361	0.48306
3.75	-0.08962	0.161885	0.381585	-0.169016	0.135191	1.06235	1.40022	-0.66372	0.479399	0.778361	0.489727
3.76667	-0.00628	0.185219	0.404918	-0.209016	0.0651913	1.08568	1.48355	-0.68372	0.472732	0.715027	0.499727
3.78333	-0.09962	0.235219	0.374918	-0.215683	-0.0148087	0.999016	1.54022	-0.62038	0.482732	0.635027	0.489727
3.8	-0.04295	0.271885	0.348251	-0.25235	-0.0714754	0.83235	1.52022	-0.47038	0.552732	0.615027	0.486393
3.81667	0.080383	0.295219	0.344918	-0.459016	-0.0614754	0.709016	1.42355	-0.33705	0.542732	0.638361	0.516393
3.83333	0.10705	0.305219	0.301585	-0.595683	-0.0648087	0.619016	1.28022	-0.17038	0.492732	0.678361	0.569727
3.85	0.08705	0.315219	0.304918	-0.629016	-0.00480874	0.37235	1.16022	0.079617	0.539399	0.755027	0.63306
3.86667	0.123716	0.281885	0.328251	-0.665683	0.205191	0.255683	1.04355	0.096284	0.579399	0.798361	0.67306
3.88333	0.320383	0.281885	0.364918	-0.63235	0.238525	0.225683	1.05355	0.042951	0.539399	0.791694	0.68306
3.9	0.560383	0.338552	0.398251	-0.60235	0.128525	0.295683	1.20355	0.019617	0.479399	0.775027	0.636393
3.91667	0.673716	0.395219	0.434918	-0.59235	-0.0281421	0.365683	1.22689	-0.00705	0.419399	0.758361	0.619727
3.93333	0.71705	0.341885	0.418251	-0.529016	0.00519126	0.379016	1.22355	-0.01705	0.392732	0.701694	0.619727
3.95	0.783716	0.278552	0.441585	-0.445683	0.168525	0.409016	1.23689	-0.06038	0.389399	0.591694	0.65306
3.96667	0.850383	0.285219	0.501585	-0.425683	0.231858	0.38235	1.23022	-0.14705	0.392732	0.588361	0.666393
3.98333	0.913713	0.305219	0.564918	-0.36235	0.268525	0.235683	1.18355	-0.17372	0.449399	0.608361	0.626393
4	0.987053	0.358552	0.644918	-0.265683	0.225191	0.0890164	1.13689	-0.09372	0.482732	0.615027	0.646393
4.01667	1.05705	0.458552	0.694918	-0.219016	0.181858	0.0756831	1.39689	0.019617	0.496066	0.665027	0.65306
4.03333	1.04705	0.491885	0.741585	-0.17235	0.141858	0.169016	1.44022	-0.01038	0.476066	0.631694	0.63306
4.05	0.983713	0.435219	0.761585	-0.139016	0.0518579	0.249016	1.44022	-0.25038	0.469399	0.618361	0.64306
4.06667	1.00038	0.425219	0.738251	-0.115683	-0.0281421	0.299016	1.46355	-0.44038	0.572732	0.631694	0.656393
4.08333	1.02705	0.411885	0.748251	-0.129016	-0.0314754	0.485683	1.56355	-0.58038	0.549399	0.635027	0.656393
4.1	1.01705	0.411885	0.804918	-0.21235	-0.0414754	0.71235	1.58355	-0.65038	0.519399	0.621694	0.686393
4.11667	0.990383	0.465219	0.854918	-0.175683	-0.0714754	0.61235	1.61689	-0.67372	0.452732	0.661694	0.666393
4.13333	0.973713	0.501885	0.824918	-0.175683	-0.134809	0.405683	1.62022	-0.65038	0.386066	0.721694	0.569727
4.15	0.920383	0.468552	0.771585	-0.21235	-0.181475	0.47235	1.53689	-0.71038	0.342732	0.725027	0.539727
4.16667	0.850383	0.391885	0.691585	-0.219016	-0.224809	0.445683	1.47355	-0.72705	0.326066	0.705027	0.52306
4.18333	0.80705	0.391885	0.688251	-0.26235	-0.261475	0.219016	1.46689	-0.78705	0.349399	0.711694	0.539727
4.2	0.857053	0.361885	0.734918	-0.22235	-0.284809	0.0456831	1.45689	-0.84038	0.409399	0.658361	0.549727
4.21667	0.907053	0.278552	0.724918	-0.18235	-0.308142	-0.0176503	1.50022	-0.85705	0.462732	0.615027	0.58306
4.23333	0.937053	0.248552	0.741585	-0.13235	-0.314809	-0.0209836	1.50689	-0.93038	0.496066	0.548361	0.609727
4.25	0.983713	0.278552	0.711585	-0.169016	-0.321475	-0.110984	1.43022	-1.04038	0.512732	0.498361	0.59306
4.26667	1.15371	0.355219	0.661585	-0.249016	-0.324809	-0.140984	1.07355	-1.21372	0.569399	0.568361	0.61306
4.28333	1.43038	0.428552	0.658251	-0.385683	-0.251475	0.00901639	0.793552	-1.28038	0.586066	0.648361	0.64306
4.3	1.62371	0.515219	0.648251	-0.51235	-0.124809	0.269016	0.716886	-1.33372	0.579399	0.691694	0.666393
4.31667	1.42705	0.671885	0.628251	-0.669016	0.00519126	0.365683	0.696886	-1.34705	0.569399	0.581694	0.696393
4.33333	1.26038	0.631885	0.544918	-0.845683	0.0151913	0.509016	0.730219	-1.32705	0.566066	0.385027	0.739727
4.35	1.09371	0.545219	0.421585	-0.90235	-0.00480874	0.525683	0.776886	-1.34372	0.529399	0.241694	0.776393
4.36667	0.990383	0.325219	0.408251	-0.809016	0.0785246	0.505683	0.823552	-1.43705	0.499399	0.358361	0.869727
4.38333	0.873713	0.401885	0.448251	-0.649016	0.178525	0.489016	0.800219	-1.29038	0.466066	0.408361	0.879727
4.4	0.613716	0.508552	0.418251	-0.529016	0.341858	0.445683	0.693552	-1.18038	0.432732	0.415027	0.816393
4.41667	0.53705	0.471885	0.371585	-0.479016	0.288525	0.49235	0.646886	-1.06038	0.416066	0.455027	0.809727
4.43333	0.50705	0.481885	0.334918	-0.43235	0.0651913	0.529016	0.576886	-0.91705	0.389399	0.485027	0.839727
4.45	0.460383	0.473552	0.278251	-0.30235	0.0385246	0.56235	0.616886	-0.90372	0.309399	0.498361	0.956393
4.46667	0.433716	0.458552	0.201585	-0.15235	0.0385246	0.509016	0.623552	-0.93705	0.256066	0.508361	0.996393
4.48333	0.403716	0.431885	0.188251	-0.0890164	0.0418579	0.24235	0.570219	-0.98038	0.229399	0.508361	0.99306
4.5	0.383716	0.348552	0.188251	-0.0756831	0.0285246	0.0790164	0.516885	-1.02705	0.159399	0.511694	0.979727
4.51667	0.400383	0.398552	0.314918	-0.0490164	0.101858	-0.0676503	0.540219	-1.03038	0.126066	0.505027	0.91306
4.53333	0.51705	0.348552	0.378251	-0.0256831	0.208525	-0.0876503	0.583552	-0.99038	0.109399	0.485027	0.80306
4.55	0.553716	0.281885	0.418251	-0.0190164	0.328525	0.0190164	0.650219	-0.95705	0.096066	0.515027	0.84306
4.56667	0.58705	0.221885	0.381585	0.0209836	0.371858	0.115683	0.683552	-0.90038	0.049399	0.571694	0.93306
4.58333	0.55705	0.098552	0.374918	0.00431694	0.431858	0.21235	0.716886	-0.86372	-0.0506	0.631694	0.90306
4.6	0.32705	0.151885	0.361585	-0.0390164	0.481858	0.229016	0.713552	-0.80705	0.006066	0.691694	0.83306
4.61667	0.27705	0.285219	0.278251	-0.0756831	0.575191	0.129016	0.713552	-0.74372	0.049399	0.705027	0.829727
4.63333	0.460383	0.285219	0.278251	-0.0890164	0.618525	0.17235	0.720219	-0.66705	0.086066	0.718361	0.86306
4.65	0.540383	0.258552	0.301585	-0.195683	0.698525	0.255683	0.746886	-0.59372	0.129399	0.781694	0.91306
4.66667	0.560383	0.211885	0.298251	-0.30235	0.831858	0.28235	0.846886	-0.51705	0.179399	0.825027	0.92306
4.68333	0.470383	0.241885	0.281585	-0.199016	0.948525	0.175683	1.04689	-0.44705	0.166066	0.831694	0.929727
4.7	0.30705	0.361885	0.364918	0.0343169	0.985191	-0.000983607	1.15689	-0.39705	0.169399	0.765027	0.949727
4.71667	0.23705	0.431885	0.408251	0.0876503	1.02519	-0.0376503	1.24022	-0.38372	0.192732	0.685027	0.989727
4.73333	0.243716	0.525219	0.434918	0.0543169	1.05852	-0.0209836	1.28022	-0.31705	0.249399	0.671694	0.969727
4.75	0.21705	0.658552	0.484918	0.180984	1.13519	0.10235	1.23355	-0.25038	0.362732	0.671694	0.906393
4.76667	0.21705	0.741885	0.521585	0.294317	1.14852	0.0823497	1.19689	-0.19038	0.596066	0.615027	0.839727
4.78333	0.24705	0.731885	0.574918	0.38765	1.14852	-0.0176503	1.18689	-0.15372	0.699399	0.568361	0.74306
4.8	0.26705	0.661885	0.621585	0.48765	1.10186	-0.204317	1.22689	-0.10705	0.722732	0.548361	0.746393
4.81667	0.330383	0.618552	0.641585	0.664317	1.00186	-0.220984	1.26689	0.012951	0.702732	0.541694	0.769727
4.83333	0.300383	0.565219	0.658251	0.870984	0.975191	-0.14765	1.32355	0.049617	0.749399	0.475027	0.766393
4.85	0.330383	0.495219	0.694918	0.924317	0.918525	-0.0476503	1.42355	0.026284	0.862732	0.451694	0.79306
4.86667	0.39705	0.448552	0.708251	0.99765	0.861858	0.0123497	1.54022	-0.04372	0.976066	0.491694	0.889727
4.88333	0.413716	0.418552	0.744918	1.04765	0.745191	0.0123497	1.58689	-0.02372	1.0594	0.555027	0.956393
4.9	0.443716	0.371885	0.824918	1.05432	0.631858	0.0223497	1.56689	0.022951	1.05607	0.605027	0.976393
4.91667	0.460383	0.341885	0.851585	0.940984	0.508525	0.0623497	1.53689	0.059617	1.0494	0.518361	0.986393
4.93333	0.480383	0.258552	0.851585	0.920984	0.465191	0.00568306	1.52689	0.089617	1.04273	0.365027	0.97306
4.95	0.403716	0.235219	0.848251	1.07098	0.435191	-0.0909836	1.47355	0.106284	0.922732	0.328361	0.946393
4.96667	0.360383	0.235219	0.824918	1.19432	0.491858	-0.0909836	1.44689	0.109617	0.692732	0.305027	0.909727
4.98333	0.243716	0.261885	0.781585	1.04432	0.571858	0.0123497	1.33689	0.099617	0.536066	0.308361	0.876393
5	0.360383	0.248552	0.758251	0.854317	0.625191	-0.00431694	1.35022	0.116284	0.472732	0.385027	0.859727
5.01667	0.430383	0.198552	0.724918	0.81765	0.671858	0.0623497	1.33689	0.122951	0.459399	0.515027	0.83306
5.03333	0.41705	0.218552	0.711585	0.864317	0.655191	0.289016	1.33689	0.136284	0.512732	0.641694	0.799727
5.05	0.303716	0.235219	0.691585	0.89765	0.675191	0.38235	1.31689	0.136284	0.532732	0.751694	0.776393
5.06667	0.280383	0.268552	0.688251	0.864317	0.708525	0.38235	1.21689	0.182954	0.519399	0.818361	0.729727
5.08333	0.293716	0.291885	0.688251	0.610984	0.725191	0.295683	1.15689	0.236284	0.512732	0.871694	0.69306
5.1	0.32705	0.288552	0.678251	0.54765	0.715191	0.19235	1.16689	0.216284	0.546066	0.868361	0.69306
5.11667	0.310383	0.288552	0.681585	0.534317	0.761858	0.129016	1.19355	0.202954	0.569399	0.818361	0.679727
5.13333	0.293716	0.281885	0.661585	0.814317	0.895191	0.0790164	1.22689	0.212954	0.609399	0.788361	0.806393
5.15	0.21705	0.261885	0.571585	0.860984	0.961858	0.145683	1.27022	0.239614	0.606066	0.788361	0.85306
5.16667	-0.05295	0.275219	0.471585	0.904317	0.928525	0.209016	1.25689	0.316284	0.556066	0.771694	0.86306
5.18333	-0.25628	0.251885	0.414918	0.984317	0.711858	0.235683	1.26022	0.306284	0.539399	0.785027	0.86306
5.2	-0.21295	0.198552	0.338251	0.904317	0.638525	0.275683	1.23022	0.216284	0.536066	0.815027	0.896393
5.21667	-0.32962	0.178552	0.281585	0.854317	0.561858	0.359016	1.21355	0.252954	0.526066	0.815027	0.88306
5.23333	-0.54295	0.198552	0.204918	0.900984	0.528525	0.389016	1.28355	0.282954	0.496066	0.871694	0.87306
5.25	-0.51295	0.085219	0.198251	0.910984	0.571858	0.425683	1.27355	0.226284	0.439399	0.908361	0.869727
5.26667	-0.34628	0.031885	0.251585	0.820984	0.691858	0.399016	1.14355	0.202954	0.412732	0.928361	0.856393
5.28333	-0.38295	0.021885	0.294918	0.700984	0.781858	0.389016	1.13355	0.216284	0.356066	0.941694	0.86306
5.3	-0.48962	0.021885	0.311585	0.690984	0.678525	0.29235	1.23022	0.242954	0.319399	0.948361	0.86306
5.31667	-0.51628	-0.04478	0.318251	0.56765	0.495191	0.299016	1.26689	0.222954	0.359399	0.921694	0.859727
5.33333	-0.45295	-0.06478	0.331585	0.560984	0.261858	0.315683	1.28689	0.246284	0.456066	0.885027	0.816393
5.35	-0.48962	-0.06811	0.258251	0.73765	0.141858	0.33235	1.22689	0.362954	0.489399	0.891694	0.756393
5.36667	-0.54295	0.011885	0.214918	0.740984	0.0485246	0.295683	1.15022	0.419614	0.489399	0.945027	0.716393
5.38333	-0.53628	0.145219	0.218251	0.680984	0.0118579	0.149016	1.14689	0.486284	0.496066	0.948361	0.746393
5.4	-0.54628	0.181885	0.261585	0.70765	0.00519126	0.139016	1.12355	0.486284	0.509399	0.911694	0.729727
5.41667	-0.48295	0.181885	0.321585	0.530984	0.00519126	0.105683	1.09355	0.442954	0.679399	0.828361	0.649727
5.43333	-0.47628	0.165219	0.298251	0.374317	0.00519126	0.0556831	1.08689	0.379614	0.762732	0.715027	0.636393
5.45	-0.53295	0.188552	0.311585	0.40765	0.0251913	0.0256831	1.08355	0.346284	0.696066	0.725027	0.659727
5.46667	-0.54628	0.201885	0.294918	0.67765	0.00852459	0.0123497	1.19689	0.329614	0.616066	0.881694	0.70306
5.48333	-0.58628	0.175219	0.248251	0.914317	-0.158142	-0.00765027	1.23355	0.319614	0.602732	0.945027	0.686393
5.5	-0.58628	0.168552	0.218251	0.934317	-0.238142	-0.0476503	1.21355	0.282954	0.582732	0.951694	0.70306
5.51667	-0.53295	0.161885	0.184918	0.70765	-0.281475	-0.0576503	1.17022	0.232954	0.526066	0.935027	0.716393
5.53333	-0.53628	0.195219	0.151585	0.574317	-0.281475	-0.0109836	1.09689	0.239614	0.452732	0.911694	0.796393
5.55	-0.46962	0.205219	0.104918	0.50765	-0.248142	0.00901639	1.14022	0.242954	0.442732	0.898361	0.84306
5.56667	-0.53295	0.138552	0.078251	0.45765	-0.211475	0.0756831	1.20689	0.222954	0.459399	0.845027	0.896393
5.58333	-0.54295	0.181885	0.101585	0.45765	-0.178142	0.29235	1.29355	0.126284	0.462732	0.825027	0.889727
5.6	-0.54295	0.298552	0.244918	0.45765	-0.118142	0.399016	1.41022	0.089617	0.416066	0.795027	0.859727
5.61667	-0.56295	0.361885	0.338251	0.454317	-0.161475	0.43235	1.40022	0.106284	0.379399	0.775027	0.769727
5.63333	-0.51628	0.431885	0.278251	0.520984	-0.274809	0.559016	1.39355	0.089617	0.352732	0.781694	0.739727
5.65	-0.40962	0.525219	0.114918	0.574317	-0.321475	0.709016	1.25689	0.072951	0.269399	0.828361	0.719727
5.66667	-0.28295	0.498552	-0.05508	0.564317	-0.348142	0.845683	1.00022	0.026284	0.212732	0.978361	0.619727
5.68333	-0.23628	0.478552	-0.07175	0.580984	-0.341475	0.805683	0.696886	-0.03038	0.149399	1.01836	0.589727
5.7	-0.25962	0.478552	-0.00508	0.614317	-0.261475	0.685683	0.623552	-0.09705	0.126066	1.05836	0.589727
5.71667	-0.24295	0.485219	-0.03175	0.650984	-0.228142	0.46235	0.596886	-0.17705	0.089399	1.10836	0.559727
5.73333	-0.20295	0.485219	0.008251	0.650984	-0.181475	0.40235	0.603552	-0.18372	0.089399	1.03503	0.536393
5.75	-0.25295	0.418552	-0.00842	0.614317	-0.141475	0.38235	0.606886	-0.05705	0.082732	0.985027	0.44306
5.76667	-0.25962	0.351885	-0.00508	0.590984	-0.0648087	0.45235	0.403552	0.046284	0.076066	0.991694	0.409727
5.78333	-0.23962	0.315219	0.058251	0.610984	-0.00814208	0.569016	0.343552	0.086284	0.092732	0.981694	0.48306
5.8	-0.25962	0.265219	0.121585	0.71765	0.0485246	0.61235	0.413552	0.159617	0.222732	0.955027	0.519727
5.81667	-0.20628	0.221885	0.081585	0.864317	0.0751913	0.62235	0.486885	0.186284	0.362732	0.888361	0.55306
5.83333	-0.12962	0.201885	0.061585	1.00432	0.0518579	0.645683	0.606886	0.152951	0.316066	0.841694	0.586393
5.85	-0.09295	0.198552	0.058251	1.05432	-0.0181421	0.619016	0.636886	0.142951	0.339399	0.831694	0.479727
5.86667	-0.06962	0.198552	0.071585	1.09765	-0.0248087	0.559016	0.523552	0.292954	0.472732	0.771694	0.43306
5.88333	0.060383	0.215219	0.098251	1.10765	-0.00147541	0.545683	0.466885	0.429614	0.496066	0.705027	0.449727
5.9	0.083716	0.241885	0.111585	0.94765	0.00852459	0.61235	0.533552	0.406284	0.486066	0.655027	0.48306
5.91667	-0.02295	0.318552	0.124918	0.770984	-0.00480874	0.455683	0.570219	0.329614	0.456066	0.638361	0.509727
5.93333	-0.13628	0.418552	0.118251	0.704317	-0.0214754	0.365683	0.583552	0.336284	0.272732	0.651694	0.529727
5.95	-0.21628	0.441885	0.148251	0.66765	0.0618579	0.42235	0.613552	0.402954	0.166066	0.698361	0.556393
5.96667	-0.06962	0.435219	0.164918	0.57765	0.0918579	0.539016	0.623552	0.462954	0.096066	0.785027	0.599727
5.98333	0.03705	0.411885	0.138251	0.524317	0.0751913	0.565683	0.630219	0.459614	0.076066	0.835027	0.62306
6	0.093716	0.411885	0.148251	0.424317	0.105191	0.545683	0.576886	0.439614	0.102732	0.861694	0.66306
6.01667	0.140383	0.405219	0.158251	0.39765	0.155191	0.525683	0.573552	0.469614	0.099399	0.905027	0.706393
6.03333	0.210383	0.381885	0.161585	0.44765	0.135191	0.519016	0.713552	0.486284	0.062732	0.891694	0.716393
6.05	0.373716	0.351885	0.181585	0.474317	0.0618579	0.459016	0.796886	0.432954	-0.0206	0.855027	0.716393
6.06667	0.410383	0.338552	0.211585	0.37765	-0.0514754	0.285683	0.826886	0.246284	-0.0706	0.838361	0.67306
6.08333	0.44705	0.398552	0.228251	0.244317	-0.108142	0.259016	0.936886	0.142951	-0.06393	0.885027	0.64306
6.1	0.450383	0.571885	0.278251	0.20765	-0.144809	0.219016	0.863552	0.129617	-0.05727	0.921694	0.659727
6.11667	0.45705	0.668552	0.308251	0.210984	-0.194809	0.24235	0.696886	0.139617	-0.10727	0.938361	0.656393
6.13333	0.400383	0.568552	0.318251	0.240984	-0.218142	0.289016	0.616886	0.176284	-0.09393	0.978361	0.646393
6.15	0.34705	0.511885	0.371585	0.21765	-0.234809	0.255683	0.613552	0.329614	-0.10393	0.961694	0.656393
6.16667	0.270383	0.445219	0.408251	0.200984	-0.294809	0.255683	0.646886	0.336284	-0.10393	0.941694	0.65306
6.18333	0.323716	0.345219	0.438251	0.174317	-0.341475	0.299016	0.690219	0.346284	-0.1606	0.915027	0.676393
6.2	0.443716	0.288552	0.454918	0.194317	-0.281475	0.235683	0.693552	0.256284	-0.1406	0.898361	0.71306
6.21667	0.563716	0.291885	0.464918	0.180984	-0.211475	0.125683	0.753552	0.189614	-0.12393	0.975027	0.716393
6.23333	0.54705	0.328552	0.481585	0.0243169	-0.184809	0.0490164	0.823552	0.189614	-0.06727	0.995027	0.706393
6.25	0.513716	0.308552	0.484918	-0.115683	-0.204809	0.0390164	0.830219	0.172951	0.142732	0.985027	0.716393
6.26667	0.493716	0.258552	0.451585	-0.14235	-0.241475	0.0623497	0.790219	0.109617	0.169399	0.945027	0.75306
6.28333	0.490383	0.271885	0.364918	-0.14235	-0.248142	0.135683	0.810219	-0.06705	0.156066	0.938361	0.826393
6.3	0.47705	0.261885	0.284918	-0.259016	-0.261475	0.185683	0.916886	-0.15705	0.236066	0.995027	0.846393
6.31667	0.42705	0.175219	0.214918	-0.335683	-0.258142	0.23235	0.950219	-0.21705	0.256066	1.06836	0.83306
6.33333	0.39705	0.058552	0.081585	-0.38235	-0.221475	0.24235	0.990219	-0.28705	0.106066	1.08503	0.80306
6.35	0.39705	0.001885	0.061585	-0.425683	-0.221475	0.239016	1.05689	-0.35372	0.042732	1.09836	0.786393
6.36667	0.37705	0.045219	0.058251	-0.465683	-0.124809	0.215683	1.15689	-0.27038	-0.06393	1.10503	0.789727
6.38333	0.37705	0.068552	0.128251	-0.51235	-0.0181421	0.22235	1.21689	-0.21372	-0.0906	1.04836	0.67306
6.4	0.440383	0.168552	0.334918	-0.625683	0.0218579	0.259016	1.11022	-0.17372	0.006066	0.865027	0.646393
6.41667	0.443716	0.108552	0.468251	-0.78235	-0.0214754	0.31235	1.08689	-0.11038	0.099399	0.755027	0.646393
6.43333	0.290383	0.081885	0.528251	-0.925683	-0.00814208	0.355683	1.19022	-0.07372	0.092732	0.708361	0.64306
6.45	0.14705	0.098552	0.498251	-1.01568	-0.0181421	0.379016	1.28022	-0.02705	0.132732	0.681694	0.646393
6.46667	0.07705	0.128552	0.381585	-1.04902	0.0185246	0.44235	1.42022	0.022951	0.142732	0.688361	0.706393
6.48333	-0.03962	0.198552	0.284918	-1.13902	0.201858	0.439016	1.48022	0.072951	0.049399	0.591694	0.776393
6.5	-0.09628	0.308552	0.198251	-1.23235	0.291858	0.295683	1.50689	0.126284	0.052732	0.531694	0.839727
6.51667	-0.14628	0.385219	0.168251	-1.26235	0.265191	0.139016	1.50022	0.146284	0.089399	0.461694	0.86306
6.53333	-0.10295	0.415219	0.181585	-1.32568	0.218525	0.10235	1.51355	0.122951	0.132732	0.385027	0.87306
6.55	-0.07295	0.425219	0.174918	-1.45235	0.0818579	0.139016	1.56022	0.102951	0.209399	0.401694	0.869727
6.56667	-0.12962	0.495219	0.121585	-1.51568	0.0118579	0.15235	1.57689	0.066284	0.362732	0.491694	0.87306
6.58333	-0.10295	0.531885	0.111585	-1.63568	0.201858	0.17235	1.54689	-0.02705	0.376066	0.495027	0.83306
6.6	-0.10295	0.541885	0.098251	-1.77568	0.358525	0.11235	1.45022	0.099617	0.356066	0.481694	0.786393
6.61667	-0.16295	0.491885	0.054918	-1.85902	0.335191	0.0656831	1.29022	0.126284	0.376066	0.438361	0.81306
6.63333	-0.26628	0.375219	-0.01175	-1.86902	0.245191	0.0756831	1.25022	0.122951	0.406066	0.405027	0.829727
6.65	-0.31628	0.325219	-0.09842	-1.69902	0.121858	0.20235	1.22689	0.092951	0.462732	0.395027	0.806393
6.66667	-0.23962	0.291885	-0.15842	-1.57235	0.121858	0.235683	1.21689	0.122951	0.482732	0.425027	0.83306
6.68333	-0.15295	0.291885	-0.08842	-1.53235	0.151858	0.185683	1.25022	0.136284	0.469399	0.421694	0.839727
6.7	-0.03295	0.308552	-0.00175	-1.48235	0.151858	0.0956831	1.34022	0.042951	0.466066	0.378361	0.799727
6.71667	0.063716	0.308552	-0.06508	-1.48568	0.171858	0.0990164	1.38689	-0.10705	0.486066	0.341694	0.736393
6.73333	-0.04295	0.305219	-0.18842	-1.48902	0.178525	0.0390164	1.34689	-0.23372	0.499399	0.338361	0.706393
6.75	-0.14962	0.301885	-0.05842	-1.53902	0.148525	0.0556831	1.33355	-0.30038	0.509399	0.375027	0.676393
6.76667	-0.03962	0.325219	0.071585	-1.60902	0.125191	0.255683	1.26355	-0.42705	0.392732	0.478361	0.659727
6.78333	0.053716	0.361885	0.104918	-1.54902	0.338525	0.419016	1.15689	-0.60705	0.299399	0.601694	0.639727
6.8	0.063716	0.425219	0.138251	-1.48902	0.381858	0.559016	1.09355	-0.68705	0.362732	0.761694	0.579727
6.81667	0.083716	0.408552	0.191585	-1.46235	0.348525	0.825683	1.07689	-0.75038	0.396066	0.891694	0.53306
6.83333	0.293716	0.311885	0.308251	-1.48235	0.341858	1.07568	1.05022	-0.81372	0.299399	0.928361	0.556393
6.85	0.39705	0.255219	0.338251	-1.49568	0.291858	0.919016	1.01355	-0.78705	0.219399	0.908361	0.556393
6.86667	0.370383	0.231885	0.234918	-1.49902	0.218525	0.765683	0.950219	-0.81038	0.246066	0.861694	0.549727
6.88333	0.20705	0.298552	0.074918	-1.46902	0.135191	0.74235	0.920219	-0.90705	0.282732	0.905027	0.599727
6.9	0.26705	0.321885	0.071585	-1.45568	0.0818579	0.69235	0.926886	-0.97705	0.382732	1.00836	0.60306
6.91667	0.333716	0.165219	0.104918	-1.44235	0.0251913	0.309016	0.910219	-0.99705	0.442732	1.06503	0.56306
6.93333	0.443716	0.028552	0.148251	-1.31568	0.0151913	0.155683	0.916886	-1.03372	0.459399	1.04169	0.53306
6.95	0.39705	-0.10811	0.211585	-1.23235	0.0451913	0.0390164	0.996886	-1.00038	0.456066	0.941694	0.576393
6.96667	0.48705	-0.06145	0.248251	-1.18568	-0.0281421	0.0190164	1.07689	-1.08705	0.476066	0.898361	0.656393
6.98333	0.800383	0.098552	0.311585	-1.11902	-0.134809	0.115683	1.02689	-1.18038	0.539399	0.901694	0.669727
7	0.68705	0.185219	0.424918	-1.15902	-0.278142	0.175683	0.986886	-1.22038	0.489399	0.951694	0.569727
7.01667	0.720383	0.201885	0.401585	-1.28902	-0.368142	0.17235	0.986886	-1.17038	0.342732	0.995027	0.55306
7.03333	0.917053	0.185219	0.218251	-1.37568	-0.321475	0.0856831	1.07689	-1.15372	0.236066	1.06169	0.516393
7.05	1.09705	0.178552	0.211585	-1.35235	-0.258142	-0.0309836	1.02689	-1.22372	0.246066	0.971694	0.456393
7.06667	1.03371	0.158552	0.238251	-1.35902	-0.218142	-0.11765	0.976886	-1.33705	0.272732	0.855027	0.526393
7.08333	0.753716	0.071885	0.258251	-1.40568	-0.251475	-0.210984	0.966886	-1.50705	0.269399	0.845027	0.62306
7.1	0.433716	-0.00811	0.274918	-1.42568	-0.338142	-0.270984	1.00022	-1.51372	0.272732	0.758361	0.599727
7.11667	0.433716	-0.03478	0.381585	-1.41902	-0.391475	-0.22765	1.00355	-1.55372	0.306066	0.678361	0.54306
7.13333	0.323716	-0.03478	0.411585	-1.35902	-0.361475	-0.154317	0.970219	-1.51372	0.302732	0.601694	0.67306
7.15	0.120383	0.430219	0.374918	-1.36902	-0.371475	-0.15765	0.963552	-1.42038	0.286066	0.571694	0.72306
7.16667	0.213716	0.350219	0.331585	-1.36568	-0.468142	-0.290984	1.01022	-1.35038	0.256066	0.601694	0.639727
7.18333	0.420383	0.206885	0.318251	-1.30235	-0.484809	-0.30765	1.05689	-1.27372	0.246066	0.631694	0.599727
7.2	0.570383	0.076885	0.311585	-1.22902	-0.308142	-0.294317	0.983552	-1.16038	0.229399	0.558361	0.709727
7.21667	0.613716	-0.40811	0.234918	-1.22568	-0.181475	-0.280984	0.876886	-1.12372	0.206066	0.491694	0.78306
7.23333	0.65705	-0.36811	0.151585	-1.26902	-0.134809	-0.34765	0.700219	-1.04372	0.216066	0.481694	0.866393
7.25	0.730383	-0.29478	0.101585	-1.32902	-0.148142	-0.304317	0.613552	-0.96372	0.336066	0.521694	0.809727
7.26667	0.803716	-0.21478	-0.08175	-1.36902	-0.298142	-0.23765	0.533552	-0.94038	0.452732	0.525027	0.759727
7.28333	0.69705	-0.17478	-0.19175	-1.39235	-0.368142	-0.210984	0.503552	-0.85038	0.512732	0.455027	0.679727
7.3	0.683716	-0.03811	-0.21175	-1.40235	-0.394809	-0.25765	0.503552	-0.69372	0.542732	0.428361	0.64306
7.31667	0.690383	0.188552	-0.19842	-1.28235	-0.421475	-0.250984	0.420219	-0.59705	0.392732	0.531694	0.606393
7.33333	0.643716	0.505219	-0.20175	-1.18902	-0.438142	-0.210984	0.376885	-0.51372	0.329399	0.555027	0.666393
7.35	0.620383	0.661885	-0.20175	-1.07902	-0.468142	-0.11765	0.430219	-0.46038	0.279399	0.505027	0.819727
7.36667	0.580383	0.711885	-0.19508	-0.939016	-0.571475	-0.134317	0.573552	-0.39038	0.202732	0.495027	0.856393
7.38333	0.400383	0.765219	-0.17175	-0.899016	-0.608142	-0.200984	0.543552	-0.26705	0.256066	0.458361	0.746393
7.4	0.273716	0.801885	-0.12842	-0.765683	-0.574809	-0.240984	0.486885	-0.23038	0.369399	0.501694	0.64306
7.41667	0.280383	0.748552	-0.02175	-0.589016	-0.471475	-0.290984	0.480219	-0.19038	0.402732	0.565027	0.54306
7.43333	0.233716	0.675219	0.018251	-0.465683	-0.421475	-0.264317	0.496885	-0.18705	0.359399	0.511694	0.379727
7.45	0.18705	0.785219	0.031585	-0.419016	-0.421475	-0.19765	0.560219	-0.12038	0.299399	0.328361	0.289727
7.46667	0.19705	0.888552	0.104918	-0.179016	-0.424809	-0.18765	0.650219	-0.08705	0.242732	0.248361	0.296393
7.48333	0.213716	0.998552	0.168251	-0.13235	-0.428142	-0.164317	0.676886	-0.05038	0.252732	0.198361	0.32306
7.5	0.220383	0.788552	0.218251	-0.105683	-0.464809	-0.10765	0.690219	-0.05038	0.259399	0.185027	0.319727
7.51667	0.150383	0.708552	0.288251	-0.119016	-0.554809	-0.194317	0.556885	-0.08372	0.252732	0.168361	0.319727
7.53333	0.09705	0.668552	0.234918	-0.155683	-0.598142	-0.0809836	0.500219	-0.06705	0.286066	0.198361	0.35306
7.55	0.060383	0.575219	0.154918	-0.345683	-0.598142	-0.0709836	0.466885	-0.03038	0.336066	0.295027	0.42306
7.56667	0.02705	0.291885	0.138251	-0.409016	-0.571475	-0.0609836	0.370219	-0.00705	0.336066	0.221694	0.53306
7.58333	0.033716	0.215219	0.154918	-0.52235	-0.514809	-0.0676503	0.280219	-0.10038	0.372732	0.165027	0.56306
7.6	0.000383	0.111885	0.281585	-0.58235	-0.501475	-0.16765	0.233552	-0.22038	0.409399	0.188361	0.559727
7.61667	-0.03962	-0.00145	0.261585	-0.605683	-0.534809	-0.120984	0.313552	-0.25038	0.419399	0.271694	0.586393
7.63333	0.023716	-0.08145	0.211585	-0.68235	-0.534809	-0.0643169	0.366885	-0.17705	0.276066	0.465027	0.569727
7.65	0.07705	-0.17811	0.148251	-0.779016	-0.534809	-0.15765	0.510219	0.009617	0.089399	0.568361	0.626393
7.66667	0.05705	-0.15811	-0.00175	-0.835683	-0.484809	-0.330984	0.693552	0.119617	-0.08727	0.551694	0.669727
7.68333	0.173716	-0.17811	-0.00175	-0.89235	-0.401475	-0.484317	0.733552	0.089617	-0.1806	0.525027	0.70306
7.7	0.340383	-0.09811	0.011585	-0.939016	-0.271475	-0.51765	0.716886	-0.01705	-0.18727	0.478361	0.659727
7.71667	0.473716	-0.01811	0.001585	-0.999016	-0.118142	-0.514317	0.766886	-0.04705	0.009399	0.545027	0.589727
7.73333	0.520383	0.031885	-0.02508	-1.05235	-0.0481421	-0.51765	0.670219	-0.12372	0.176066	0.621694	0.509727
7.75	0.54705	0.035219	-0.05842	-1.07568	-0.0848087	-0.46765	0.643552	-0.18705	0.226066	0.551694	0.54306
7.76667	0.723716	0.128552	-0.03508	-1.11235	-0.174809	-0.420984	0.680219	-0.20705	0.229399	0.551694	0.659727
7.78333	0.837053	0.168552	-0.03175	-1.15235	-0.348142	-0.324317	0.776886	-0.19372	0.132732	0.488361	0.65306
7.8	0.823713	0.148552	-0.04842	-1.11902	-0.334809	-0.0543169	0.896886	-0.27038	0.156066	0.458361	0.75306
7.81667	0.827053	0.171885	-0.22175	-0.995683	-0.338142	0.18235	0.946886	-0.25372	0.192732	0.501694	0.78306
7.83333	0.813716	0.208552	-0.22842	-1.03235	-0.334809	0.265683	0.993552	-0.22705	0.102732	0.375027	0.786393
7.85	0.56705	0.281885	-0.24175	-1.10235	-0.314809	0.149016	1.05022	-0.23372	0.096066	0.348361	0.999727
7.86667	0.353716	0.268552	-0.32175	-1.14235	-0.351475	0.13235	1.15022	-0.22372	0.146066	0.505027	1.13973
7.88333	0.290383	0.258552	-0.31842	-1.21902	-0.348142	0.255683	1.29355	-0.14038	0.116066	0.591694	1.16639
7.9	0.373716	0.285219	-0.32508	-1.32568	-0.248142	0.285683	1.18689	-0.04038	0.152732	0.618361	1.15306
7.91667	0.420383	0.281885	-0.31842	-1.30902	-0.344809	0.325683	1.00355	0.042951	0.282732	0.681694	1.15639
7.93333	0.243716	0.211885	-0.24842	-1.25902	-0.541475	0.405683	0.990219	0.052951	0.379399	0.755027	1.17306
7.95	0.08705	0.241885	-0.17842	-1.10568	-0.581475	0.65235	1.17689	0.036284	0.482732	0.708361	1.17306
7.96667	0.070383	0.198552	-0.18508	-0.955683	-0.544809	0.789016	1.20022	0.132951	0.532732	0.518361	1.18639
7.98333	-0.02628	0.228552	-0.15842	-0.929016	-0.554809	0.855683	1.18022	0.232954	0.502732	0.488361	1.06306
8	-0.01628	0.228552	-0.14175	-0.935683	-0.641475	0.99235	1.20689	0.266284	0.509399	0.591694	0.979727
8.01667	-0.18962	0.171885	-0.10508	-0.90235	-0.771475	1.04235	1.30355	0.319614	0.492732	0.698361	0.769727
8.03333	-0.09628	0.218552	-0.07175	-0.865683	-0.754809	0.909016	1.30689	0.492954	0.449399	0.695027	0.58306
8.05	0.223716	0.315219	-0.04175	-0.849016	-0.741475	0.80235	1.22689	0.646284	0.396066	0.645027	0.486393
8.06667	0.393716	0.375219	-0.00175	-0.69235	-0.831475	0.789016	1.20022	0.806284	0.389399	0.601694	0.529727
8.08333	0.28705	0.511885	0.038251	-0.505683	-0.701475	0.805683	1.17355	0.799614	0.552732	0.555027	0.469727
8.1	0.300383	0.555219	0.074918	-0.53235	-0.661475	0.61235	1.19689	0.716284	0.652732	0.511694	0.416393
8.11667	0.43705	0.551885	0.071585	-0.525683	-0.901475	0.429016	1.26355	0.696284	0.536066	0.448361	0.439727
8.13333	0.573716	0.661885	0.054918	-0.569016	-0.978142	0.315683	1.27355	0.679614	0.536066	0.308361	0.33306
8.15	0.37705	0.758552	0.014918	-0.595683	-0.971475	0.32235	1.20689	0.582954	0.636066	0.091694	0.136393
8.16667	0.290383	0.991885	0.008251	-0.57235	-0.754809	0.665683	1.19355	0.482954	0.716066	0.125027	-0.03361
8.18333	0.35705	1.04855	-0.03175	-0.585683	-0.461475	0.885683	1.14355	0.429614	0.726066	0.201694	0.206393
8.2	0.630383	0.981885	-0.06842	-0.525683	-0.458142	0.83235	1.13355	0.449614	0.729399	0.431694	0.36306
8.21667	0.333716	0.968552	-0.07508	-0.509016	-0.404809	0.85235	0.976886	0.462954	0.636066	0.551694	0.24306
8.23333	0.12705	0.961885	0.024918	-0.515683	-0.314809	0.81235	0.916886	0.359614	0.659399	0.375027	0.079727
8.25	0.15705	0.875219	0.178251	-0.58235	-0.374809	0.65235	1.08355	0.342954	0.702732	0.231694	0.076393
8.26667	0.09705	0.811885	0.258251	-0.699016	-0.551475	0.579016	1.09022	0.486284	0.689399	0.231694	0.11306
8.28333	0.083716	0.641885	0.138251	-0.69235	-0.541475	0.299016	1.03022	0.536284	0.612732	0.361694	0.266393
8.3	0.000383	0.565219	0.138251	-0.575683	-0.361475	0.235683	1.03355	0.502954	0.326066	0.605027	0.319727
8.31667	-0.03628	0.541885	0.291585	-0.255683	-0.211475	0.479016	1.04355	0.366284	0.162732	0.708361	0.326393
8.33333	0.030383	0.361885	0.331585	-0.0890164	-0.251475	0.78235	0.953552	0.182954	0.179399	0.718361	0.06306
8.35	0.103716	0.198552	0.328251	-0.129016	-0.364809	0.769016	0.853552	-0.01372	0.199399	0.788361	0.079727
8.36667	0.213716	0.128552	0.188251	-0.199016	-0.331475	0.609016	0.800219	-0.08038	0.156066	0.781694	0.096393
8.38333	0.300383	0.125219	0.161585	-0.129016	-0.164809	0.58235	0.746886	-0.16705	0.096066	0.858361	0.09306
8.4	0.223716	0.128552	0.108251	-0.11235	-0.191475	0.765683	0.723552	-0.22372	0.102732	0.995027	0.13306
8.41667	0.273716	0.028552	0.134918	-0.165683	-0.234809	0.979016	0.663552	-0.10372	0.069399	1.00503	0.349727
8.43333	0.460383	-0.05811	0.168251	-0.14235	-0.351475	1.03902	0.580219	-0.12038	-0.07727	1.07169	0.406393
8.45	0.573716	-0.12145	0.121585	-0.0156831	-0.371475	1.11902	0.570219	-0.09372	-0.20393	1.11503	0.42306
8.46667	0.480383	-1.40811	-0.03842	0.15765	-0.364809	1.17235	0.593552	-0.05038	-0.19727	1.10836	0.506393
8.48333	0.210383	-0.08978	-0.16508	-0.0790164	-0.558142	1.21235	0.560219	-0.03705	-0.14393	1.05169	0.666393
8.5	0.133716	0.078552	-0.29842	-0.199016	-0.514809	1.32568	0.506885	-0.07038	-0.16393	0.921694	0.874727
8.51667	0.303716	0.101885	-0.42175	-0.145683	-0.514809	1.25235	0.473552	-0.12705	-0.2306	0.888361	1.07973
8.53333	0.270383	0.526885	-0.30842	0.000983607	-0.521475	1.24902	0.503552	-0.18038	-0.24727	0.975027	1.29639
8.55	0.230383	0.308552	-0.29508	0.284317	-0.591475	1.30235	0.663552	-0.17705	-0.26727	1.10169	1.55973
8.56667	0.293716	0.193552	-0.26175	0.37765	-0.651475	1.23568	0.843552	-0.17038	-0.31393	1.17836	1.55306
8.58333	0.250383	-0.11145	-0.24842	0.384317	-0.648142	1.13568	0.820219	-0.16038	-0.1806	1.25169	1.31306
8.6	0.200383	0.095219	-0.29508	0.300984	-0.598142	1.13902	0.720219	-0.14705	0.056066	1.18836	1.18639
8.61667	0.023716	0.351885	-0.33508	0.35765	-0.611475	1.04568	0.670219	-0.10705	0.099399	1.16169	0.989727
8.63333	-0.02295	0.451885	-0.33508	0.29765	-0.688142	0.85235	0.696886	-0.12372	0.106066	1.13169	0.96306
8.65	-0.04295	0.475219	-0.32842	0.190984	-0.858142	0.575683	0.786886	-0.17705	0.096066	1.13503	0.969727
8.66667	-0.07628	0.591885	-0.42842	0.214317	-0.868142	0.48235	0.693552	-0.26705	0.166066	1.05836	0.89306
8.68333	-0.16628	0.641885	-0.49508	0.22765	-0.634809	0.375683	0.803552	-0.28372	0.206066	0.938361	0.946393
8.7	0.063716	0.775219	-0.54842	0.35765	-0.481475	0.385683	0.943552	-0.22038	0.196066	0.835027	1.01306
8.71667	0.14705	0.875219	-0.51175	0.50765	-0.471475	0.589016	0.946886	-0.24372	0.176066	0.825027	0.996393
8.73333	0.18705	0.935219	-0.44842	0.550984	-0.571475	0.71235	0.966886	-0.39705	0.172732	0.871694	0.969727
8.75	0.290383	0.858552	-0.38175	0.62765	-0.514809	0.699016	1.04689	-0.43705	0.062732	0.888361	0.976393
8.76667	0.220383	0.865219	-0.33508	0.55765	-0.381475	0.689016	1.16022	-0.36038	0.009399	0.898361	1.02306
8.78333	0.143716	0.951885	-0.30842	0.23765	-0.314809	0.80235	1.11022	-0.36038	0.199399	0.985027	1.15639
8.8	0.123716	1.04522	-0.36842	-0.0256831	-0.371475	0.79235	1.07355	-0.30705	0.489399	1.23503	1.12306
8.81667	-0.14295	1.02855	-0.45842	-0.0923497	-0.458142	0.80235	0.956886	-0.23372	0.606066	1.32836	0.956393
8.83333	-0.16962	0.921885	-0.44175	-0.129016	-0.424809	0.87235	0.710219	-0.25705	0.469399	1.36836	0.866393
8.85	-0.02962	0.905219	-0.40175	-0.449016	-0.411475	0.959016	0.726886	-0.32372	0.306066	1.42169	0.66306
8.86667	0.233716	0.898552	-0.46508	-0.50235	-0.448142	1.27568	0.943552	-0.32038	0.212732	1.41503	0.539727
8.88333	0.220383	0.918552	-0.52842	-0.519016	-0.544809	1.38568	1.11355	-0.38038	0.172732	1.45503	0.446393
8.9	0.250383	0.925219	-0.54508	-0.79235	-0.584809	1.35568	1.15022	-0.27705	0.112732	1.46503	0.339727
8.91667	0.243716	0.878552	-0.55175	-0.99235	-0.558142	1.14235	1.11355	-0.07372	0.046066	1.50503	0.526393
8.93333	0.03705	0.808552	-0.54508	-0.975683	-0.488142	1.01235	1.22689	-0.02372	0.196066	1.45836	0.70306
8.95	-0.25295	1.24355	-0.48175	-1.01568	-0.244809	1.18568	1.21355	-0.10705	0.269399	1.38503	0.896393
8.96667	-0.32962	1.11522	-0.38842	-1.08902	-0.0881421	1.31235	1.31689	-0.14372	0.236066	1.29169	0.879727
8.98333	-0.13295	0.591885	-0.36508	-1.04902	-0.214809	1.36568	1.50022	-0.26038	0.176066	1.31169	0.886393
9	0.083716	0.861885	-0.31508	-0.86235	-0.401475	1.23235	1.55022	-0.36038	0.276066	1.39503	0.896393
9.01667	0.18705	1.04188	-0.30842	-0.55235	-0.688142	1.34235	1.44022	-0.40705	0.316066	1.37836	0.819727
9.03333	0.283716	1.09855	-0.37842	-0.315683	-0.898142	1.55902	1.40355	-0.36038	0.242732	1.33836	0.859727
9.05	0.35705	1.03522	-0.43508	-0.395683	-0.891475	1.48235	1.46022	-0.27705	0.229399	1.39169	0.75306
9.06667	0.180383	0.965219	-0.38508	-0.58235	-0.738142	1.45568	1.52689	-0.24038	0.236066	1.37169	0.599727
9.08333	0.120383	1.40355	-0.30508	-0.629016	-0.631475	1.48902	1.51355	-0.29372	0.249399	1.17503	0.616393
9.1	0.040383	1.39355	-0.28175	-0.565683	-0.764809	1.32568	1.47355	-0.40038	0.252732	1.03836	0.729727
9.11667	0.010383	0.875219	-0.34842	-0.485683	-0.954809	1.33902	1.42689	-0.37038	0.239399	0.961694	0.886393
9.13333	-0.01962	0.908552	-0.41842	-0.715683	-1.07148	1.35902	1.31689	-0.43705	0.016066	0.968361	0.986393
9.15	0.10705	0.988552	-0.42508	-0.89235	-1.07814	1.18568	1.22022	-0.44372	-0.1206	1.03836	1.26973
9.16667	0.180383	1.12855	-0.47175	-0.945683	-1.06814	0.929016	1.22022	-0.30372	-0.1306	1.20503	1.36973
9.18333	0.03705	1.16189	-0.46842	-1.09568	-1.00148	1.00235	1.01689	-0.29038	-0.1506	1.31503	1.40806
9.2	-0.01962	1.07188	-0.41508	-1.07902	-0.914809	0.94235	0.990219	-0.35038	0.059399	1.37503	1.35639
9.21667	0.023716	0.991885	-0.43175	-1.01235	-0.908142	0.705683	1.23022	-0.32038	0.132732	1.25503	1.32306
9.23333	-0.08628	1.00855	-0.58175	-1.14568	-0.814809	0.669016	1.29355	-0.22372	0.132732	1.13836	1.34306
9.25	0.030383	1.02188	-0.40842	-1.14902	-0.641475	0.649016	1.33355	-0.24372	-0.0506	1.01503	1.42306
9.26667	0.14705	1.24522	-0.35842	-1.05902	-0.474809	0.60235	1.36022	-0.29372	-0.22727	1.01169	1.43639
9.28333	0.20705	1.15688	-0.34175	-0.999016	-0.411475	0.30235	1.43022	-0.35705	-0.2406	0.911694	1.33306
9.3	0.29705	1.15022	-0.21175	-0.805683	-0.361475	0.0990164	1.47022	-0.48705	-0.32393	0.691694	1.27306
9.31667	0.26705	1.18855	-0.14175	-0.669016	-0.394809	0.259016	1.37355	-0.43372	-0.3606	0.485027	1.27639
9.33333	0.253716	1.18522	-0.11175	-0.915683	-0.401475	0.25235	1.37355	-0.42372	-0.2606	0.421694	1.21306
9.35	0.230383	0.905219	-0.08508	-0.84235	-0.421475	-0.0443169	1.35022	-0.39038	-0.12727	0.398361	1.20973
9.36667	0.283716	0.955219	-0.00842	-0.709016	-0.504809	0.0223497	1.49689	-0.37038	-0.0206	0.368361	1.27639
9.38333	0.26705	1.00855	-0.04508	-0.605683	-0.481475	0.19235	1.65355	-0.41038	-0.10727	0.258361	1.35306
9.4	0.17705	1.05188	-0.03842	-0.389016	-0.398142	0.33235	1.70022	-0.44038	-0.05393	0.135027	1.29639
9.41667	-0.19628	1.09188	-0.17842	-0.255683	-0.441475	0.225683	1.69355	-0.41705	-0.01727	0.011694	1.30973
9.43333	-0.23962	1.12522	-0.25508	-0.20235	-0.484809	0.0956831	1.75689	-0.34038	-0.06727	0.048361	1.52306
9.45	-0.20628	0.978552	-0.36508	-0.149016	-0.648142	0.0690164	1.87689	-0.40038	-0.03727	0.205027	1.55806
9.46667	-0.24295	0.825219	-0.41175	-0.179016	-0.748142	0.00234973	1.94022	-0.53705	0.002732	0.278361	1.47639
9.48333	-0.17628	0.701885	-0.31842	-0.159016	-0.874809	-0.0709836	1.95355	-0.61705	-0.0206	0.325027	1.25806
9.5	-0.05628	0.581885	-0.21508	-0.0323497	-0.954809	-0.0176503	1.91355	-0.57038	-0.2706	0.255027	1.04806
9.51667	-0.03962	0.508552	-0.20842	-0.0690164	-0.944809	0.15235	1.82689	-0.47705	-0.40727	0.191694	0.979727
9.53333	-0.03295	0.481885	-0.20175	-0.259016	-1.03148	0.189016	1.68355	-0.44372	-0.58727	0.158361	1.06639
9.55	0.22705	0.555219	-0.23175	-0.38235	-1.23148	0.0823497	1.58355	-0.35372	-0.58393	0.141694	1.27639
9.56667	0.493716	0.601885	-0.24508	-0.32235	-1.32814	-0.0209836	1.44022	-0.39038	-0.6606	0.121694	1.42973
9.58333	0.540383	0.631885	-0.29508	-0.285683	-1.18481	-0.0376503	1.39022	-0.49705	-0.64393	0.011694	1.53306
9.6	0.390383	0.571885	-0.30842	-0.245683	-1.15148	-0.140984	1.19355	-0.58372	-0.5706	-0.11497	1.42306
9.61667	0.31705	0.421885	-0.29508	-0.195683	-1.04814	-0.21765	1.09355	-0.60372	-0.52393	-0.13497	1.33806
9.63333	0.453716	0.355219	-0.19508	-0.24235	-0.864809	-0.21765	1.05355	-0.57705	-0.39727	-0.13831	1.28639
9.65	0.590383	0.515219	-0.14842	-0.37235	-0.874809	-0.140984	0.960219	-0.52038	-0.41727	-0.17164	1.09973
9.66667	0.610383	0.681885	-0.17842	-0.27235	-0.971475	-0.0309836	0.853552	-0.48705	-0.54393	-0.11164	1.13306
9.68333	0.620383	0.711885	-0.13842	-0.199016	-0.998142	0.0390164	0.703552	-0.52705	-0.61727	0.008361	1.28806
9.7	0.663716	0.785219	-0.17175	-0.199016	-0.894809	0.0656831	0.696886	-0.58038	-0.64393	0.058361	1.31139
9.71667	0.643716	0.865219	-0.21175	-0.239016	-0.574809	-0.0109836	0.713552	-0.66705	-0.75393	0.068361	1.06306
9.73333	0.553716	0.868552	-0.20842	-0.27235	-0.604809	-0.0276503	0.666886	-0.68372	-0.8906	0.061694	0.946393
9.75	0.63705	0.845219	-0.20842	-0.355683	-0.544809	0.10235	0.630219	-0.72705	-0.97727	0.091694	0.756393
9.76667	0.740383	0.745219	-0.22175	-0.409016	-0.484809	0.27235	0.640219	-0.74705	-1.0006	0.108361	0.79306
9.78333	0.490383	0.751885	-0.24175	-0.365683	-0.451475	0.27235	0.630219	-0.68038	-0.85727	0.005027	0.896393
9.8	0.320383	0.695219	-0.24842	-0.35235	-0.458142	0.325683	0.640219	-0.63038	-0.69393	-0.00497	0.869727
9.81667	0.293716	0.728552	-0.17508	-0.395683	-0.404809	0.479016	0.640219	-0.56372	-0.54393	0.071694	0.86306
9.83333	0.293716	0.801885	-0.06508	-0.509016	-0.264809	0.519016	0.633552	-0.56038	-0.39393	0.058361	0.89306
9.85	0.253716	0.858552	-0.02508	-0.579016	-0.208142	0.55235	0.750219	-0.58038	-0.2006	0.031694	0.969727
9.86667	0.20705	0.938552	0.004918	-0.605683	-0.268142	0.519016	1.00022	-0.49372	0.009399	0.078361	0.989727
9.88333	0.030383	0.918552	0.074918	-0.57235	-0.314809	0.18235	1.17355	-0.42705	0.052732	0.118361	0.816393
9.9	-0.06962	0.721885	0.211585	-0.52235	-0.418142	0.125683	1.17355	-0.42705	0.102732	0.121694	0.72306
9.91667	0.06705	0.036885	0.238251	-0.489016	-0.621475	0.239016	1.08355	-0.46372	0.186066	0.135027	0.709727
9.93333	0.080383	-0.11645	0.271585	-0.499016	-0.571475	0.229016	1.07355	-0.53705	0.322732	0.115027	0.729727
9.95	0.100383	-0.19811	0.291585	-0.525683	-0.584809	0.399016	1.10022	-0.85705	0.289399	0.185027	0.76806
9.96667	0.243716	-0.46311	0.298251	-0.585683	-0.631475	0.379016	1.15355	-0.89038	0.182732	0.158361	0.69306
9.98333	0.20705	-0.70645	0.328251	-0.629016	-0.841475	0.409016	1.32355	-0.76372	0.002732	0.128361	0.729727
10	0.203716	-0.83145	0.358251	-0.685683	-0.898142	0.319016	1.40355	-0.72372	-0.10393	0.128361	0.699727
10.0167	0.013716	-0.37145	0.371585	-0.725683	-0.884809	0.20235	1.33689	-0.67372	-0.09727	0.208361	0.62306
10.0333	-0.24962	-0.41478	0.428251	-0.75235	-0.578142	0.289016	1.18689	-0.63038	-0.09393	0.181694	0.57306
10.05	-0.13628	-0.38811	0.494918	-0.739016	-0.248142	0.439016	1.21689	-0.63038	-0.14727	0.241694	0.479727
10.0667	0.063716	-0.31811	0.534918	-0.755683	-0.218142	0.365683	1.30355	-0.62038	-0.2206	0.325027	0.519727
10.0833	0.05705	-0.17145	0.608251	-0.765683	-0.194809	0.259016	1.40355	-0.52038	-0.25727	0.475027	0.509727
10.1	0.080383	0.101885	0.641585	-0.639016	-0.204809	0.105683	1.53022	-0.50372	-0.17393	0.521694	0.486393
10.1167	0.180383	0.338552	0.564918	-0.625683	-0.324809	0.10235	1.57022	-0.64705	-0.27393	0.688361	0.496393
10.1333	0.353716	0.235219	0.448251	-0.57235	-0.444809	0.0290164	1.42689	-0.73705	-0.38393	0.791694	0.56306
10.15	0.280383	0.121885	0.358251	-0.675683	-0.428142	-0.0309836	0.886886	-0.70038	-0.44393	0.718361	0.566393
10.1667	0.18705	0.035219	0.404918	-0.855683	-0.338142	-0.0376503	0.776886	-0.70372	-0.48393	0.661694	0.519727
10.1833	0.35705	0.613552	0.504918	-0.845683	-0.194809	0.0423497	0.883552	-0.73705	-0.36393	0.768361	0.506393
10.2	0.460383	0.700219	0.604918	-0.685683	-0.144809	0.0456831	0.953552	-0.84038	-0.3206	0.965027	0.476393
10.2167	0.34705	0.678552	0.654918	-0.345683	-0.151475	0.275683	0.813552	-0.96038	-0.3106	0.971694	0.40306
10.2333	0.27705	-0.05145	0.684918	-0.0123497	-0.244809	0.425683	0.760219	-1.01705	-0.2806	0.898361	0.319727
10.25	0.143716	-0.07811	0.774918	0.150984	-0.338142	0.42235	0.806886	-1.05705	-0.22393	0.868361	0.316393
10.2667	0.04705	-0.07145	0.878251	0.31765	-0.468142	0.385683	0.720219	-1.15705	-0.14393	0.835027	0.259727
10.2833	-0.04962	-0.04478	0.948251	0.450984	-0.528142	0.175683	0.666886	-1.28372	-0.15393	0.775027	0.216393
10.3	-0.05962	0.095219	0.998251	0.49765	-0.521475	0.0556831	0.740219	-1.29372	-0.27727	0.758361	0.249727
10.3167	0.013716	0.128552	1.10159	0.384317	-0.481475	0.109016	0.800219	-1.25705	-0.33727	0.765027	0.50306
10.3333	0.070383	0.118552	1.12825	0.24765	-0.428142	0.29235	0.876886	-1.22705	-0.29727	0.925027	0.56306
10.35	-0.01962	-0.02811	1.11492	0.230984	-0.354809	0.475683	0.856886	-1.31705	-0.26393	0.965027	0.539727
10.3667	-0.11295	-0.17811	1.04825	0.324317	-0.414809	0.595683	0.880219	-1.32705	-0.26393	1.02836	0.45306
10.3833	-0.19295	-0.21478	0.938251	0.454317	-0.478142	0.689016	0.856886	-1.18705	-0.0406	0.948361	0.339727
10.4	-0.16962	-0.06478	0.884918	0.604317	-0.494809	0.795683	0.703552	-1.12038	-0.0506	0.811694	0.24306
10.4167	-0.03295	0.015219	0.884918	0.45765	-0.408142	0.77235	0.653552	-1.20705	-0.01393	0.718361	0.106393
10.4333	0.043716	0.041885	0.944918	0.38765	-0.331475	0.645683	0.760219	-1.17038	0.099399	0.795027	0.00306
10.45	0.110383	0.015219	0.951585	0.490984	-0.331475	0.589016	0.773552	-1.05038	0.119399	0.771694	-0.12694
10.4667	0.060383	-0.02145	0.941585	0.51765	-0.351475	0.539016	0.816886	-0.89038	-0.06727	0.745027	-0.01694
10.4833	-0.05962	-0.06811	0.861585	0.424317	-0.318142	0.40235	0.900219	-0.98705	-0.2306	0.745027	0.066393
10.5	-0.06962	-0.18145	0.841585	0.33765	-0.324809	0.325683	0.916886	-1.09705	-0.29393	0.775027	0.16306
10.5167	-0.04962	-0.41811	0.834918	0.240984	-0.371475	0.32235	0.916886	-1.13038	-0.3706	0.841694	0.264727
10.5333	-0.05962	-0.49145	0.841585	0.260984	-0.394809	0.33235	0.940219	-1.08372	-0.43393	0.978361	0.389727
10.55	-0.01628	-0.49811	0.904918	0.20765	-0.368142	0.269016	0.913552	-1.01038	-0.48393	1.09503	0.429727
10.5667	0.050383	-0.42145	0.958251	0.140984	-0.418142	0.55235	0.910219	-0.99705	-0.54727	1.15836	0.37306
10.5833	0.14705	0.266885	0.928251	0.114317	-0.201475	0.75235	0.873552	-0.94705	-0.54393	1.14169	0.36306
10.6	0.210383	0.228552	0.938251	-0.0190164	-0.0414754	0.599016	0.830219	-1.02372	-0.4306	1.13169	0.41306
10.6167	0.02705	-0.42478	0.971585	-0.189016	-0.0514754	0.45235	0.843552	-1.09372	-0.4306	1.11836	0.47306
10.6333	-0.11295	-0.56145	0.974918	-0.309016	-0.108142	0.305683	0.813552	-1.16038	-0.41727	1.11836	0.479727
10.65	-0.10962	-0.67478	0.891585	-0.319016	-0.148142	0.295683	0.786886	-1.17705	-0.43393	1.24836	0.469727
10.6667	0.020383	-0.69811	0.774918	-0.16235	-0.271475	0.44235	0.800219	-1.13705	-0.46727	1.24836	0.459727
10.6833	0.15705	-0.68811	0.548251	-0.0856831	-0.298142	0.59235	0.793552	-1.22038	-0.4506	1.19836	0.546393
10.7	0.14705	-0.55811	0.414918	-0.18235	-0.351475	0.68235	0.876886	-1.25705	-0.4606	1.21503	0.616393
10.7167	0.05705	0.148552	0.274918	-0.259016	-0.361475	0.739016	1.02689	-1.20705	-0.4706	1.13836	0.599727
10.7333	0.020383	-0.18811	0.254918	-0.359016	-0.378142	0.709016	0.970219	-1.17038	-0.52727	0.991694	0.616393
10.75	0.093716	-0.16478	0.104918	-0.369016	-0.311475	0.70235	0.856886	-1.16705	-0.5006	0.825027	0.69306
10.7667	0.193716	-0.18145	-0.00175	-0.269016	-0.168142	0.869016	0.916886	-1.16038	-0.42393	0.755027	0.676393
10.7833	0.173716	-0.21811	0.001585	-0.249016	-0.0614754	0.88235	0.980219	-1.13705	-0.4306	0.735027	0.68306
10.8	0.183716	-0.18145	0.018251	-0.309016	-0.0348087	0.629016	1.04355	-1.10372	-0.39727	0.538361	0.709727
10.8167	0.213716	-0.16811	0.168251	-0.28235	-0.0614754	0.505683	0.950219	-1.12372	-0.38393	0.378361	0.699727
10.8333	0.160383	-0.28811	0.244918	-0.205683	-0.0148087	0.549016	0.873552	-1.13372	-0.27727	0.358361	0.63306
10.85	0.11705	-0.38478	0.228251	-0.195683	0.0751913	0.58235	0.820219	-1.09705	-0.2506	0.345027	0.666393
10.8667	0.20705	-0.36145	0.204918	-0.22235	0.121858	0.635683	0.843552	-1.10705	-0.21393	0.375027	0.716393
10.8833	0.400383	0.021885	0.248251	-0.219016	0.158525	0.87235	0.900219	-1.06038	-0.1706	0.448361	0.639727
10.9	0.48705	0.205219	0.311585	-0.229016	0.171858	0.945683	0.956886	-0.92038	-0.19727	0.428361	0.599727
10.9167	0.543716	0.261885	0.351585	-0.285683	0.168525	0.759016	0.970219	-0.87705	-0.27727	0.405027	0.66306
10.9333	0.540383	0.271885	0.424918	-0.395683	0.208525	0.705683	0.913552	-0.82372	-0.32727	0.385027	0.699727
10.95	0.403716	0.155219	0.431585	-0.459016	0.198525	0.675683	0.926886	-0.75372	-0.32393	0.271694	0.776393
10.9667	0.380383	0.045219	0.368251	-0.48235	0.211858	0.68235	1.00355	-0.83038	-0.3206	0.268361	0.84306
10.9833	0.400383	0.085219	0.384918	-0.48235	0.128525	0.699016	1.35355	-1.02705	-0.38393	0.355027	0.936393
11	0.41705	0.205219	0.458251	-0.405683	0.0651913	0.76235	1.52689	-1.15705	-0.63727	0.368361	1.14306
11.0167	0.44705	0.238552	0.324918	-0.355683	0.0118579	0.835683	1.48022	-1.24038	-0.66393	0.321694	1.26973
11.0333	0.430383	0.308552	0.271585	-0.435683	-0.0281421	0.849016	1.44022	-1.28705	-0.68393	0.235027	1.28973
11.05	0.440383	-0.28811	0.321585	-0.485683	-0.0514754	0.93235	1.29689	-1.18038	-0.70727	0.195027	1.33306
11.0667	0.493716	-0.47478	0.311585	-0.46235	-0.0814754	1.04568	1.18022	-1.11372	-0.78393	0.248361	1.18139
11.0833	0.490383	-0.24145	0.291585	-0.39235	-0.0448087	1.07568	1.13022	-1.10038	-0.9506	0.401694	1.13973
11.1	0.373716	-0.28811	0.231585	-0.515683	0.00852459	0.769016	1.03355	-1.20038	-0.9006	0.618361	1.14306
11.1167	0.300383	-0.18145	0.274918	-0.53235	0.0818579	0.63235	1.04689	-1.24372	-0.82727	0.688361	1.15306
11.1333	0.263716	-0.13811	0.351585	-0.485683	0.148525	0.595683	1.31022	-1.25038	-0.82727	0.741694	1.09639
11.15	0.213716	-0.09811	0.411585	-0.315683	0.161858	0.689016	1.49689	-1.14038	-0.75727	0.695027	1.07639
11.1667	0.21705	-0.04811	0.348251	-0.28235	0.151858	0.76235	1.43022	-1.01705	-0.7106	0.581694	1.14973
11.1833	0.220383	0.081885	0.191585	-0.30235	0.175191	0.91235	1.34022	-0.98038	-0.73393	0.515027	1.20639
11.2	0.270383	0.108552	0.194918	-0.289016	0.161858	0.85235	1.30355	-0.91705	-0.6306	0.448361	1.17306
11.2167	0.42705	-0.01478	0.258251	-0.30235	0.175191	0.789016	1.20022	-0.77372	-0.54727	0.415027	1.14306
11.2333	0.810383	-0.17145	0.228251	-0.439016	0.105191	0.815683	1.08022	-0.73038	-0.5306	0.391694	1.23973
11.25	1.11371	-0.32145	0.278251	-0.539016	0.0218579	1.01568	0.996886	-0.69038	-0.5506	0.285027	1.33973
11.2667	1.18705	-0.22145	0.264918	-0.599016	0.0185246	1.07235	0.913552	-0.64705	-0.5106	0.191694	1.48973
11.2833	0.977053	-0.10478	0.184918	-0.60235	-0.0714754	1.03235	0.910219	-0.55038	-0.47393	0.141694	1.50639
11.3	0.813716	-0.06811	0.161585	-0.405683	-0.118142	1.31568	1.06689	-0.52705	-0.4306	0.115027	1.60639
11.3167	0.74705	0.065219	0.061585	-0.335683	-0.331475	1.35568	1.04355	-0.46038	-0.38393	0.168361	1.62306
11.3333	0.773716	0.305219	0.044918	-0.215683	-0.434809	1.15902	1.05355	-0.51372	-0.4106	0.148361	1.58639
11.35	0.79705	0.671885	0.124918	0.0409836	-0.458142	1.13235	1.17355	-0.50372	-0.48727	0.195027	1.58639
11.3667	0.613716	0.948552	0.164918	-0.0123497	-0.481475	0.725683	1.13689	-0.36372	-0.51727	0.355027	1.56306
11.3833	0.483716	0.965219	0.124918	-0.315683	-0.424809	0.579016	1.09022	-0.31372	-0.39727	0.505027	1.49639
11.4	0.40705	0.845219	0.084918	-0.57235	-0.281475	0.889016	0.980219	-0.47705	-0.29727	0.585027	1.41639
11.4167	0.463716	0.988552	0.114918	-0.55235	-0.331475	1.05235	0.776886	-0.71038	-0.24393	0.645027	1.41306
11.4333	0.450383	1.10189	0.074918	-0.465683	-0.344809	0.88235	0.650219	-0.81705	-0.08393	0.565027	1.34973
11.45	0.370383	1.13189	0.061585	-0.249016	-0.204809	0.789016	0.726886	-0.81038	0.239399	0.471694	1.25306
11.4667	0.29705	1.10522	0.141585	-0.11235	-0.144809	0.605683	0.903552	-0.80038	0.239399	0.358361	1.20306
11.4833	0.320383	1.10522	0.101585	-0.00568306	0.0418579	0.42235	0.816886	-0.81705	0.099399	0.335027	1.15306
11.5	0.390383	1.18855	0.068251	0.194317	0.165191	0.325683	0.746886	-0.83372	0.032732	0.411694	1.11973
11.5167	0.323716	1.21189	0.041585	0.444317	0.0751913	0.419016	0.650219	-0.79038	0.026066	0.648361	1.13306
11.5333	0.263716	1.50522	0.078251	0.454317	0.0218579	0.44235	0.513552	-0.74372	-0.00727	0.698361	1.09306
11.55	0.22705	0.921885	0.101585	0.274317	0.0318579	0.539016	0.403552	-0.66705	-0.13393	0.508361	1.04306
11.5667	0.12705	0.828552	0.094918	0.280984	-0.0148087	0.70235	0.456885	-0.64372	-0.1506	0.415027	1.10639
11.5833	0.113716	0.671885	0.161585	0.370984	-0.0748087	0.695683	0.586886	-0.68372	-0.1406	0.465027	1.20306
11.6	0.21705	0.601885	0.171585	0.420984	-0.168142	0.77235	0.590219	-0.72705	-0.1706	0.565027	1.28306
11.6167	0.390383	0.701885	0.221585	0.55765	-0.218142	1.08568	0.493552	-0.69038	-0.1806	0.705027	1.27306
11.6333	0.46705	0.765219	0.281585	0.57765	-0.0814754	1.26235	0.453552	-0.67372	-0.24393	0.701694	1.30973
11.65	0.493716	0.711885	0.261585	0.570984	0.00852459	1.29902	0.603552	-0.67372	-0.2606	0.655027	1.42639
11.6667	0.473716	0.655219	0.198251	0.49765	0.141858	1.00235	0.650219	-0.72372	-0.30393	0.681694	1.43973
11.6833	0.433716	0.765219	0.238251	0.434317	0.141858	0.86235	0.650219	-0.75372	-0.27727	0.678361	1.41639
11.7	0.32705	0.825219	0.218251	0.380984	0.121858	0.82235	0.743552	-0.84038	-0.2306	0.715027	1.41973
11.7167	0.243716	0.811885	0.144918	0.34765	0.115191	0.865683	0.880219	-0.80705	-0.2406	0.768361	1.44973
11.7333	0.26705	0.851885	0.111585	0.464317	0.0318579	0.715683	1.05022	-0.70705	-0.25727	0.765027	1.42639
11.75	0.320383	0.838552	0.091585	0.394317	-0.0414754	0.419016	0.946886	-0.71372	-0.42393	0.735027	1.16973
11.7667	0.463716	0.821885	0.068251	0.374317	-0.0248087	0.249016	0.866886	-0.86705	-0.49393	0.708361	0.90306
11.7833	0.413716	1.23689	-0.00842	0.420984	0.0185246	0.0756831	0.916886	-1.03038	-0.48727	0.698361	0.85306
11.8	0.37705	0.838552	-0.02842	0.344317	0.0318579	0.00568306	0.680219	-1.08705	-0.41393	0.591694	0.826393
11.8167	0.363716	0.808552	-0.01175	0.254317	-0.0514754	0.0923497	0.706886	-0.98705	-0.1206	0.475027	0.78306
11.8333	0.39705	0.425219	-0.03175	0.194317	-0.214809	0.115683	0.906886	-0.95372	0.032732	0.401694	0.779727
11.85	0.433716	0.811885	-0.06508	0.134317	-0.281475	0.139016	0.943552	-1.05038	0.026066	0.471694	0.849727
11.8667	0.50705	0.785219	-0.05175	-0.10235	-0.284809	-0.0109836	0.976886	-1.14038	-0.04393	0.565027	0.926393
11.8833	0.383716	0.658552	-0.11508	-0.379016	-0.204809	-0.240984	1.08022	-1.04372	-0.1806	0.495027	0.809727
11.9	0.110383	0.605219	-0.15508	-0.559016	-0.328142	-0.19765	1.20689	-0.92038	-0.23393	0.505027	0.796393
11.9167	0.180383	0.645219	-0.16508	-0.585683	-0.384809	-0.00765027	1.08689	-0.89038	-0.2006	0.451694	0.81306
11.9333	0.270383	0.581885	-0.17842	-0.54235	-0.361475	0.239016	1.01022	-0.88372	-0.16727	0.318361	0.944727
11.95	0.28705	0.595219	-0.17175	-0.57235	-0.361475	0.445683	1.08689	-0.88038	-0.1706	0.161694	0.91306
11.9667	0.34705	0.681885	-0.06175	-0.905683	-0.344809	0.439016	1.01689	-0.83038	-0.24393	0.175027	0.914727
11.9833	0.300383	0.461885	0.194918	-1.08568	-0.398142	0.375683	0.960219	-0.74705	-0.31727	0.408361	0.906393
12	0.253716	0.238552	0.328251	-0.85235	-0.488142	0.37235	0.910219	-0.73705	-0.3806	0.558361	0.92306

## Sheet: Tg(Avil-CreERT2) Cap
Time	Trpv1fl/fl	Trpv1fl/fl	Trpv1fl/fl	Trpv1fl/fl	Trpv1fl/fl	Tg(Avil-CreERT2);Trpv1fl/fl	Tg(Avil-CreERT2);Trpv1fl/fl	Tg(Avil-CreERT2);Trpv1fl/fl
	U013	U015	U345	U747	U016	U016	U011	U012
-1	0.82623	-0.94902	0.380984	1.39525	-0.21689	-1.63246	0.43377	1.02639
-0.98333	1.00623	-0.83902	0.330984	1.43525	-0.11689	-1.59246	0.24377	0.786393
-0.96667	1.21623	-0.75902	0.270984	1.42525	-0.02689	-1.54246	0.26377	0.676393
-0.95	1.34623	-0.75902	0.190984	1.36525	-0.01689	-1.33246	0.29377	0.636393
-0.93333	1.45623	-0.70902	0.150984	1.25525	-0.11689	-1.22246	0.36377	0.526393
-0.91667	1.44623	-0.64902	0.150984	1.11525	-0.14689	-1.01246	0.58377	0.406393
-0.9	1.36623	-0.52902	0.120984	0.985246	-0.15689	-0.90246	0.72377	0.276393
-0.88333	1.20623	-0.28902	0.150984	0.915246	-0.17689	-0.87246	0.43377	0.086393
-0.86667	1.07623	-0.16902	0.200984	0.795246	-0.18689	-0.82246	0.41377	-0.00361
-0.85	0.92623	-0.08902	0.210984	0.495246	-0.16689	-0.69246	0.72377	0.016393
-0.83333	0.84623	-0.01902	0.230984	0.245246	-0.18689	-0.52246	0.87377	0.016393
-0.81667	0.68623	0.030984	0.250984	0.055246	-0.26689	-0.46246	0.93377	0.116393
-0.8	0.41623	-0.14902	0.220984	-0.06475	-0.15689	-0.70246	0.90377	0.166393
-0.78333	0.23623	-0.28902	0.140984	-0.16475	-0.05689	-0.69246	0.81377	0.146393
-0.76667	0.22623	-0.46902	0.030984	-0.20475	0.103115	-0.68246	0.60377	0.216393
-0.75	0.22623	-0.53902	-0.02902	-0.13475	0.303115	-0.78246	0.32377	0.316393
-0.73333	0.19623	-0.54902	-0.09902	-0.11475	0.343115	-1.03246	0.24377	0.276393
-0.71667	0.22623	-0.56902	-0.11902	-0.17475	0.253115	-0.97246	0.26377	0.236393
-0.7	0.34623	-0.51902	-0.07902	-0.35475	0.133115	-0.69246	0.28377	0.166393
-0.68333	0.32623	-0.43902	-0.07902	-0.35475	0.043115	-0.59246	0.07377	0.046393
-0.66667	0.19623	-0.45902	-0.12902	-0.28475	0.003115	-0.46246	-0.09623	-0.08361
-0.65	0.00623	-0.32902	-0.13902	-0.27475	-0.03689	-0.27246	-0.14623	-0.11361
-0.63333	-0.17377	-0.19902	-0.10902	-0.26475	-0.04689	-0.25246	-0.23623	-0.12361
-0.61667	-0.26377	-0.04902	-0.08902	-0.28475	-0.04689	-0.21246	-0.38623	-0.22361
-0.6	-0.19377	0.020984	-0.07902	-0.28475	-0.01689	-0.20246	-0.39623	-0.42361
-0.58333	-0.04377	0.030984	-0.06902	-0.27475	0.003115	-0.08246	-0.44623	-0.78361
-0.56667	-0.09377	-0.01902	-0.08902	-0.26475	0.003115	0.067541	-0.49623	-1.17361
-0.55	-0.19377	-0.13902	-0.08902	-0.28475	0.003115	0.187541	-0.48623	-1.29361
-0.53333	-0.21377	-0.28902	-0.01902	-0.28475	0.003115	0.267541	-0.41623	-1.47361
-0.51667	-0.36377	-0.39902	0.070984	-0.19475	0.033115	0.447541	-0.40623	-1.54361
-0.5	-0.56377	-0.60902	0.250984	-0.23475	0.003115	0.547541	-0.81623	-1.62361
-0.48333	-0.58377	-0.64902	-0.04902	-0.43475	-0.04689	0.637541	-1.07623	-1.63361
-0.46667	-0.57377	-0.56902	-0.43902	-0.48475	0.083115	0.677541	-1.28623	-1.56361
-0.45	-0.55377	-0.48902	-0.45902	-0.48475	0.273115	0.547541	-1.36623	-1.45361
-0.43333	-0.53377	-0.40902	-0.40902	-0.48475	0.313115	0.457541	-1.44623	-1.44361
-0.41667	-0.47377	-0.25902	-0.44902	-0.51475	0.363115	0.507541	-1.07623	-0.99361
-0.4	-0.45377	-0.08902	-0.50902	-0.54475	0.423115	0.567541	-0.91623	-0.77361
-0.38333	-0.53377	0.010984	-0.53902	-0.50475	0.123115	0.587541	-0.86623	-0.61361
-0.36667	-0.66377	0.070984	-0.61902	-0.46475	-0.06689	0.677541	-0.69623	-0.43361
-0.35	-0.72377	0.020984	-0.69902	-0.45475	-0.03689	0.687541	-0.39623	-0.31361
-0.33333	-0.72377	0.000984	-0.68902	-0.46475	0.073115	0.657541	-0.17623	-0.25361
-0.31667	-0.69377	0.060984	-0.66902	-0.48475	0.243115	0.627541	0.01377	-0.16361
-0.3	-0.67377	0.120984	-0.56902	-0.49475	0.293115	0.647541	0.14377	-0.04361
-0.28333	-0.67377	0.170984	-0.29902	-0.49475	0.303115	0.547541	0.22377	0.076393
-0.26667	-0.66377	0.530984	-0.15902	-0.53475	0.283115	0.407541	0.28377	0.196393
-0.25	-0.61377	0.740984	-0.19902	-0.58475	0.213115	0.317541	0.35377	0.296393
-0.23333	-0.54377	0.820984	-0.15902	-0.59475	0.073115	0.287541	0.40377	0.386393
-0.21667	-0.47377	0.940984	-0.05902	-0.60475	-0.02689	0.327541	0.45377	0.486393
-0.2	-0.41377	0.950984	0.110984	-0.51475	-0.08689	0.597541	0.46377	0.536393
-0.18333	-0.39377	0.910984	0.320984	-0.07475	-0.07689	0.767541	0.44377	0.576393
-0.16667	-0.37377	0.880984	0.350984	0.155246	-0.03689	0.877541	0.43377	0.616393
-0.15	-0.34377	0.750984	0.320984	0.165246	-0.05689	0.917541	0.28377	0.736393
-0.13333	-0.31377	0.470984	0.400984	0.245246	-0.09689	0.947541	0.12377	0.756393
-0.11667	-0.28377	0.530984	0.550984	0.335246	-0.01689	0.977541	0.02377	0.776393
-0.1	-0.23377	0.960984	0.510984	0.345246	-0.08689	1.02754	-0.02623	0.806393
-0.08333	-0.12377	1.18098	0.470984	0.365246	-0.16689	0.997541	0.01377	0.886393
-0.06667	-0.13377	1.14098	0.440984	0.285246	-0.14689	0.747541	0.06377	0.976393
-0.05	-0.17377	1.05098	0.350984	-0.08475	-0.28689	0.587541	0.08377	1.05639
-0.03333	-0.20377	0.860984	0.320984	-0.09475	-0.33689	0.417541	0.08377	1.10639
-0.01667	-0.25377	0.620984	0.290984	0.145246	-0.30689	0.337541	0.02377	1.08639
0	-0.30377	0.350984	0.390984	0.375246	-0.26689	0.357541	-0.05623	1.04639
0.016667	-0.34377	0.330984	0.770984	0.645246	-0.25689	0.417541	-0.17623	1.04639
0.033333	-0.27377	0.490984	0.800984	4.07525	0.293115	0.257541	-0.27623	0.596393
0.05	-0.10377	0.710984	0.440984	1.30525	0.513115	-0.12246	0.19377	-5.57361
0.066667	0.01623	1.10098	0.460984	1.19525	0.363115	-0.17246	-0.08623	0.466393
0.083333	0.62623	1.07098	0.560984	1.05525	-0.04689	-0.54246	-0.12623	0.776393
0.1	0.35623	1.20098	0.930984	1.50525	-0.50689	-0.81246	-0.38623	0.586393
0.116667	-0.02377	1.11098	0.690984	1.95525	-0.88689	-1.21246	-0.42623	0.316393
0.133333	-0.91377	1.01098	0.550984	2.03525	-1.48689	-1.67246	-0.70623	0.246393
0.15	-1.56377	0.980984	0.380984	1.84525	-2.13689	-1.83246	-0.79623	0.236393
0.166667	-1.69377	0.980984	0.090984	1.61525	-2.58689	-1.68246	-0.51623	0.216393
0.183333	-1.63377	0.970984	0.080984	1.36525	-2.82689	-1.44246	-0.31623	0.176393
0.2	-1.81377	0.860984	-0.18902	0.865246	-2.66689	-1.66246	-0.16623	-0.04361
0.216667	-2.29377	0.650984	-0.73902	0.095246	-2.48689	-2.06246	-0.11623	0.116393
0.233333	-2.50377	0.610984	-1.04902	-0.49475	-2.50689	-2.38246	-0.21623	0.466393
0.25	-2.97377	0.500984	-1.16902	-0.67475	-2.66689	-2.33246	-0.30623	0.516393
0.266667	-3.78377	-0.25902	-1.22902	-0.74475	-2.85689	-2.13246	-0.27623	0.426393
0.283333	-4.10377	-0.87902	-1.47902	-0.85475	-2.90689	-1.60246	-0.25623	0.286393
0.3	-4.39377	-1.16902	-1.81902	-1.16475	-3.24689	-1.24246	-0.33623	-0.06361
0.316667	-4.69377	-1.51902	-2.06902	-1.37475	-3.51689	-1.00246	-0.54623	0.156393
0.333333	-4.52377	-1.83902	-2.36902	-1.39475	-3.55689	-0.68246	-0.74623	0.466393
0.35	-4.46377	-2.07902	-2.64902	-1.47475	-3.55689	-0.61246	-0.97623	0.476393
0.366667	-4.97377	-2.28902	-2.86902	-1.63475	-3.56689	-0.97246	-1.06623	0.406393
0.383333	-5.03377	-2.49902	-3.07902	-1.81475	-3.54689	-1.31246	-1.15623	0.656393
0.4	-5.12377	-2.63902	-3.27902	-2.18475	-3.57689	-1.51246	-1.21623	0.926393
0.416667	-5.50377	-2.66902	-3.59902	-2.57475	-3.57689	-1.42246	-0.96623	1.03639
0.433333	-5.72377	-2.72902	-3.69902	-2.86475	-3.82689	-1.38246	-0.44623	1.03639
0.45	-5.77377	-2.78902	-3.61902	-2.91475	-4.11689	-1.69246	-0.38623	1.16639
0.466667	-5.84377	-2.83902	-3.51902	-2.58475	-4.11689	-2.03246	-0.49623	1.11639
0.483333	-5.80377	-2.81902	-3.56902	-2.93475	-4.01689	-2.15246	-0.60623	1.13639
0.5	-5.46377	-2.87902	-3.61902	-3.52475	-3.97689	-2.24246	-0.75623	1.46639
0.516667	-5.49377	-3.03902	-3.56902	-3.70475	-3.98689	-2.16246	-0.79623	1.74639
0.533333	-5.54377	-3.03902	-3.49902	-3.64475	-4.02689	-2.01246	-0.83623	1.87639
0.55	-5.58377	-2.97902	-3.49902	-3.40475	-3.89689	-1.88246	-0.75623	2.06639
0.566667	-5.69377	-2.95902	-3.51902	-3.34475	-3.74689	-1.83246	-0.50623	2.48639
0.583333	-5.87377	-2.98902	-3.68902	-3.41475	-3.74689	-1.97246	-0.69623	2.86639
0.6	-5.96377	-2.93902	-3.65902	-3.63475	-3.86689	-1.93246	-0.89623	3.02639
0.616667	-6.21377	-2.61902	-3.62902	-3.90475	-3.92689	-1.90246	-1.06623	3.06639
0.633333	-6.59377	-2.58902	-3.84902	-4.12475	-3.88689	-1.80246	-1.17623	3.06639
0.65	-6.82377	-2.98902	-3.79902	-4.12475	-3.87689	-1.58246	-1.25623	3.01639
0.666667	-6.86377	-3.03902	-3.51902	-3.79475	-3.91689	-1.38246	-1.29623	3.02639
0.683333	-6.75377	-2.99902	-3.30902	-3.83475	-3.75689	-1.20246	-1.30623	3.10639
0.7	-6.82377	-2.99902	-3.24902	-3.72475	-3.47689	-0.94246	-1.34623	3.17639
0.716667	-6.90377	-3.17902	-3.43902	-3.62475	-3.40689	-0.67246	-1.54623	3.34639
0.733333	-6.98377	-3.24902	-3.66902	-3.64475	-3.40689	-0.61246	-1.67623	3.37639
0.75	-7.02377	-3.23902	-3.81902	-3.60475	-3.42689	-0.35246	-1.65623	3.54639
0.766667	-7.03377	-3.22902	-3.81902	-3.80475	-3.05689	0.367541	-1.53623	3.90639
0.783333	-7.02377	-3.25902	-3.76902	-3.95475	-2.88689	0.717541	-1.30623	3.90639
0.8	-6.96377	-3.32902	-3.73902	-4.28475	-2.97689	0.717541	-1.32623	3.77639
0.816667	-6.86377	-3.32902	-3.54902	-4.63475	-2.90689	0.437541	-1.25623	3.79639
0.833333	-6.90377	-3.43902	-3.14902	-4.53475	-2.82689	0.027541	-1.07623	3.86639
0.85	-6.88377	-3.46902	-2.99902	-4.00475	-2.80689	-0.26246	-1.05623	3.79639
0.866667	-6.85377	-3.45902	-2.84902	-3.99475	-2.60689	-0.29246	-0.91623	3.95639
0.883333	-7.05377	-3.43902	-2.65902	-4.14475	-2.22689	-0.41246	-0.79623	4.08639
0.9	-7.23377	-3.40902	-2.40902	-4.20475	-1.88689	-0.48246	-0.69623	4.36639
0.916667	-7.35377	-3.35902	-2.18902	-4.10475	-1.66689	-0.34246	-0.59623	4.77639
0.933333	-7.39377	-3.18902	-2.10902	-4.25475	-1.75689	-0.28246	-0.57623	4.91639
0.95	-7.40377	-2.87902	-2.18902	-4.42475	-1.85689	-0.11246	-0.47623	5.12639
0.966667	-7.26377	-2.81902	-2.26902	-4.32475	-1.95689	0.047541	-0.37623	5.20639
0.983333	-6.85377	-2.79902	-2.06902	-4.16475	-2.03689	0.047541	-0.48623	5.24639
1	-6.42377	-2.73902	-1.89902	-4.15475	-1.99689	0.077541	-0.83623	5.12639
1.01667	-6.20377	-2.71902	-1.76902	-4.18475	-1.83689	0.277541	-1.02623	5.43639
1.03333	-6.16377	-2.71902	-1.63902	-4.54475	-1.65689	0.417541	-1.10623	5.67639
1.05	-6.31377	-2.72902	-1.83902	-5.12475	-1.52689	0.577541	-1.06623	5.58639
1.06667	-6.52377	-2.65902	-2.24902	-5.21475	-1.42689	0.697541	-1.04623	5.53639
1.08333	-6.50377	-2.61902	-2.28902	-4.95475	-1.36689	0.857541	-1.01623	5.52639
1.1	-6.45377	-2.50902	-2.19902	-4.71475	-1.26689	0.987541	-1.08623	5.53639
1.11667	-6.38377	-2.19902	-2.19902	-4.39475	-1.06689	0.957541	-1.10623	5.60639
1.13333	-6.17377	-1.92902	-2.34902	-4.23475	-1.04689	0.767541	-0.89623	5.75639
1.15	-6.13377	-1.85902	-2.29902	-4.02475	-1.44689	0.587541	-0.85623	5.87639
1.16667	-5.90377	-1.94902	-2.21902	-4.11475	-1.71689	0.547541	-1.02623	5.83639
1.18333	-5.77377	-2.05902	-2.00902	-3.95475	-1.70689	0.537541	-1.21623	5.56639
1.2	-5.79377	-2.33902	-1.87902	-3.56475	-1.62689	0.347541	-1.41623	5.38639
1.21667	-6.23377	-2.28902	-1.84902	-3.37475	-1.43689	0.267541	-1.26623	5.28639
1.23333	-6.51377	-1.82902	-1.77902	-3.32475	-1.26689	0.237541	-1.16623	5.32639
1.25	-6.56377	-1.59902	-1.68902	-3.15475	-1.12689	0.207541	-1.04623	5.52639
1.26667	-6.55377	-1.61902	-1.67902	-3.00475	-1.09689	0.187541	-0.98623	5.66639
1.28333	-6.54377	-1.60902	-1.67902	-3.04475	-1.14689	0.177541	-1.09623	5.63639
1.3	-6.51377	-1.48902	-1.65902	-3.17475	-0.97689	0.127541	-1.41623	5.49639
1.31667	-6.52377	-1.44902	-1.69902	-3.21475	-0.87689	0.067541	-1.77623	5.37639
1.33333	-6.64377	-1.50902	-1.71902	-2.73475	-0.85689	0.057541	-1.86623	5.31639
1.35	-6.63377	-1.71902	-1.66902	-2.66475	-0.76689	0.157541	-1.42623	5.23639
1.36667	-6.60377	-1.87902	-1.51902	-2.62475	-0.75689	0.237541	-1.26623	5.13639
1.38333	-6.43377	-1.82902	-1.44902	-2.38475	-0.79689	0.147541	-1.18623	5.21639
1.4	-6.20377	-1.77902	-1.40902	-2.27475	-0.75689	0.077541	-1.10623	5.36639
1.41667	-5.97377	-1.69902	-1.40902	-1.95475	-0.53689	-0.00246	-1.17623	5.32639
1.43333	-5.87377	-1.93902	-1.41902	-1.86475	-0.38689	-0.03246	-1.54623	5.42639
1.45	-5.73377	-2.29902	-1.36902	-1.94475	-0.28689	-0.03246	-1.59623	5.42639
1.46667	-5.61377	-2.01902	-1.37902	-1.87475	-0.23689	-0.01246	-1.26623	5.40639
1.48333	-5.53377	-1.62902	-1.33902	-1.62475	-0.35689	0.017541	-1.29623	5.36639
1.5	-5.45377	-1.86902	-1.05902	-1.47475	-0.36689	0.047541	-1.37623	5.29639
1.51667	-5.35377	-2.12902	-0.67902	-1.20475	-0.25689	0.197541	-1.35623	5.10639
1.53333	-5.20377	-2.05902	-0.57902	-0.95475	-0.07689	0.487541	-1.16623	4.09639
1.55	-5.09377	-2.02902	-0.61902	-0.99475	0.013115	0.687541	-0.96623	4.17639
1.56667	-4.99377	-1.96902	-0.59902	-1.47475	-0.20689	0.827541	-0.84623	4.68639
1.58333	-4.99377	-1.89902	-0.43902	-1.76475	-0.34689	0.887541	-0.79623	4.48639
1.6	-5.29377	-1.80902	-0.31902	-1.69475	-0.07689	0.867541	-0.75623	4.47639
1.61667	-5.35377	-1.63902	-0.24902	-1.29475	0.363115	0.907541	-0.74623	4.48639
1.63333	-5.22377	-1.59902	-0.23902	-1.25475	0.533115	0.967541	-0.68623	4.37639
1.65	-5.06377	-1.60902	-0.23902	-1.43475	0.643115	0.947541	-0.52623	4.02639
1.66667	-5.00377	-1.55902	-0.32902	-1.44475	0.633115	0.947541	-0.46623	3.77639
1.68333	-4.98377	-1.36902	-0.49902	-1.10475	0.593115	0.967541	-0.64623	3.62639
1.7	-5.08377	-0.98902	-0.53902	-0.89475	0.613115	0.867541	-0.74623	3.31639
1.71667	-5.27377	-0.89902	-0.54902	-0.77475	0.763115	0.627541	-0.76623	3.13639
1.73333	-5.45377	-0.81902	-0.57902	-0.78475	1.03312	0.347541	-0.76623	2.96639
1.75	-5.44377	-0.71902	-0.61902	-0.69475	1.24311	0.137541	-0.79623	2.66639
1.76667	-5.31377	-0.64902	-0.64902	-0.57475	1.45311	0.117541	-0.74623	2.48639
1.78333	-5.18377	-0.59902	-0.75902	-0.47475	1.50311	0.077541	-0.60623	2.28639
1.8	-5.06377	-0.55902	-0.85902	-0.37475	1.51311	-0.08246	-0.55623	1.96639
1.81667	-4.93377	-0.34902	-0.83902	-0.41475	1.54312	-0.27246	-0.54623	1.75639
1.83333	-4.81377	-0.29902	-0.79902	-0.54475	1.56312	-0.50246	-0.53623	1.66639
1.85	-4.57377	-0.26902	-0.74902	-0.76475	1.61312	-0.53246	-0.49623	1.97639
1.86667	-4.15377	-0.29902	-0.69902	-0.84475	1.72311	-0.55246	-0.37623	2.08639
1.88333	-4.02377	-0.32902	-0.67902	-0.80475	1.82312	-0.57246	-0.37623	2.09639
1.9	-3.72377	-0.35902	-0.62902	-0.43475	1.72311	-0.55246	-0.35623	2.08639
1.91667	-3.60377	-0.29902	-0.48902	-0.69475	1.49311	-0.55246	-0.28623	2.17639
1.93333	-3.55377	-0.19902	-0.43902	-0.81475	1.47311	-0.54246	-0.04623	2.27639
1.95	-3.68377	-0.16902	-0.48902	-1.07475	1.46311	-0.55246	0.18377	2.37639
1.96667	-4.12377	-0.15902	-0.50902	-1.19475	1.33312	-0.59246	0.30377	2.41639
1.98333	-4.30377	-0.07902	-0.43902	-1.29475	0.863115	-0.62246	0.54377	2.31639
2	-4.61377	-0.06902	-0.29902	-1.16475	0.663115	-0.63246	0.74377	2.18639
2.01667	-4.81377	-0.11902	-0.28902	-1.20475	0.463115	-0.64246	0.79377	2.06639
2.03333	-4.82377	-0.24902	-0.35902	-1.44475	0.463115	-0.65246	0.86377	1.94639
2.05	-4.61377	-0.30902	-0.28902	-1.66475	0.503115	-0.58246	0.88377	1.92639
2.06667	-4.54377	-0.43902	-0.10902	-1.54475	0.503115	-0.45246	0.73377	1.98639
2.08333	-4.48377	-0.46902	0.100984	-1.35475	0.603115	-0.36246	0.45377	2.07639
2.1	-4.39377	-0.47902	0.190984	-1.27475	0.193115	-0.31246	0.24377	2.15639
2.11667	-4.50377	-0.61902	0.220984	-1.25475	-0.17689	-0.27246	0.05377	2.22639
2.13333	-4.59377	-0.69902	0.110984	-1.29475	-0.26689	-0.26246	-0.07623	2.33639
2.15	-4.64377	-0.67902	-0.00902	-1.76475	-0.24689	-0.28246	-0.32623	2.34639
2.16667	-4.69377	-0.53902	-0.02902	-1.90475	-0.14689	-0.29246	-0.37623	2.18639
2.18333	-4.73377	-0.40902	0.090984	-1.66475	0.063115	-0.30246	-0.34623	2.10639
2.2	-4.66377	-0.30902	0.170984	-1.52475	0.213115	-0.31246	-0.25623	2.09639
2.21667	-4.32377	-0.28902	0.150984	-1.54475	0.303115	-0.30246	-0.24623	2.25639
2.23333	-3.98377	-0.35902	0.070984	-1.41475	0.023115	-0.28246	-0.14623	2.41639
2.25	-3.64377	-0.42902	-0.02902	-1.32475	-0.24689	-0.37246	0.21377	2.55639
2.26667	-3.51377	-0.48902	-0.08902	-1.24475	-0.16689	-0.42246	0.34377	2.63639
2.28333	-3.41377	-0.54902	0.030984	-1.12475	0.253115	-0.40246	0.37377	2.65639
2.3	-3.36377	-0.45902	0.120984	-1.09475	0.573115	-0.21246	0.42377	2.65639
2.31667	-3.01377	-0.51902	-0.05902	-1.07475	0.723115	0.007541	0.46377	2.59639
2.33333	-2.89377	-0.76902	-0.17902	-1.06475	0.863115	0.097541	0.33377	2.51639
2.35	-2.94377	-0.78902	0.060984	-1.07475	0.993115	0.037541	-0.05623	2.42639
2.36667	-2.82377	-0.46902	0.160984	-1.12475	1.05312	-0.17246	-0.21623	2.31639
2.38333	-2.62377	-0.35902	0.270984	-1.16475	1.07312	-0.34246	-0.20623	2.18639
2.4	-2.31377	-0.36902	0.440984	-1.07475	1.17311	-0.46246	-0.15623	2.07639
2.41667	-2.10377	-0.41902	0.670984	-0.41475	1.32312	-0.56246	-0.05623	1.97639
2.43333	-2.02377	-0.55902	0.850984	-0.02475	1.40311	-0.62246	0.14377	1.81639
2.45	-2.00377	-0.71902	1.03098	0.025246	1.38312	-0.71246	0.16377	1.44639
2.46667	-1.76377	-0.80902	1.18098	0.095246	1.43311	-0.75246	0.04377	1.14639
2.48333	-1.19377	-0.76902	1.20098	0.295246	1.51311	-0.76246	-0.14623	0.906393
2.5	-0.81377	-0.71902	1.18098	0.365246	1.36312	-0.71246	-0.13623	0.786393
2.51667	-0.64377	-0.74902	1.16098	0.235246	1.17311	-0.72246	0.23377	0.736393
2.53333	-0.53377	-0.94902	1.14098	0.205246	1.10312	-0.75246	0.65377	0.676393
2.55	-0.73377	-0.90902	1.19098	0.205246	1.13312	-0.76246	0.73377	0.606393
2.56667	-0.89377	-0.66902	1.42098	0.205246	1.18311	-0.73246	0.71377	0.556393
2.58333	-0.83377	-0.79902	1.49098	0.185246	1.28312	-0.69246	0.74377	0.556393
2.6	-0.82377	-1.26902	1.49098	0.205246	1.52311	-0.67246	0.88377	0.566393
2.61667	-1.10377	-1.60902	1.46098	0.255246	1.40311	-0.60246	1.05377	0.496393
2.63333	-1.22377	-1.65902	1.34098	0.245246	0.923115	-0.54246	1.18377	0.286393
2.65	-1.23377	-1.56902	1.27098	0.405246	0.773115	-0.53246	1.21377	0.196393
2.66667	-1.22377	-1.44902	1.30098	0.615246	1.08312	-0.49246	0.96377	0.156393
2.68333	-1.22377	-1.19902	1.39098	0.725246	1.50311	-0.46246	0.94377	0.166393
2.7	-1.23377	-1.14902	1.38098	0.805246	1.59312	-0.46246	0.97377	0.186393
2.71667	-1.24377	-0.96902	1.35098	0.905246	1.49311	-0.47246	0.92377	0.186393
2.73333	-1.20377	-1.10902	1.37098	0.715246	1.53312	-0.46246	0.87377	0.176393
2.75	-1.16377	-1.17902	1.02098	0.555246	1.48311	-0.47246	0.78377	0.176393
2.76667	-1.16377	-1.15902	0.850984	0.475246	1.27311	-0.48246	0.77377	0.126393
2.78333	-1.12377	-1.12902	0.710984	0.435246	1.32312	-0.50246	0.84377	-0.02361
2.8	-1.16377	-0.90902	0.660984	0.405246	1.35312	-0.55246	0.92377	-0.04361
2.81667	-1.22377	-0.75902	0.610984	0.395246	1.16311	-0.54246	1.03377	0.306393
2.83333	-1.32377	-0.69902	0.580984	0.365246	1.17311	-0.53246	1.18377	0.396393
2.85	-1.44377	-0.64902	0.560984	0.355246	1.35312	-0.51246	1.23377	0.296393
2.86667	-1.56377	-0.58902	0.560984	0.355246	1.48311	-0.40246	1.22377	0.176393
2.88333	-1.62377	-0.37902	0.540984	0.425246	1.62312	-0.36246	1.26377	-0.01361
2.9	-1.32377	-0.19902	0.400984	0.445246	1.70311	-0.49246	1.35377	-0.10361
2.91667	-1.18377	0.020984	0.350984	0.395246	1.66311	-0.56246	1.23377	-0.02361
2.93333	-1.12377	0.520984	0.300984	0.445246	1.58312	-0.68246	1.00377	0.286393
2.95	-1.02377	0.690984	0.240984	0.615246	1.70311	-0.81246	0.93377	0.206393
2.96667	-0.96377	0.400984	0.200984	0.625246	1.95311	-0.87246	0.83377	-0.00361
2.98333	-0.85377	0.300984	0.130984	0.315246	2.19312	-0.86246	0.92377	-0.19361
3	-0.85377	0.270984	0.100984	0.315246	2.37311	-0.71246	0.98377	-0.34361
3.01667	-0.86377	0.330984	0.040984	0.375246	2.53312	-0.66246	1.17377	-0.59361
3.03333	-0.86377	0.250984	0.000984	0.375246	2.58311	-0.70246	1.28377	-0.72361
3.05	-0.83377	0.160984	0.150984	0.205246	2.32312	-0.91246	1.34377	-0.72361
3.06667	-0.94377	0.210984	0.410984	0.005246	2.20311	-0.94246	1.36377	-0.78361
3.08333	-1.03377	0.170984	0.390984	-0.12475	2.27312	-0.73246	1.33377	-0.91361
3.1	-1.07377	0.090984	0.320984	-0.10475	2.34312	-0.55246	1.45377	-1.09361
3.11667	-1.13377	0.230984	0.320984	-0.11475	2.41311	-0.40246	1.63377	-1.37361
3.13333	-1.17377	0.320984	0.340984	-0.06475	2.15312	-0.13246	1.65377	-1.51361
3.15	-1.21377	0.440984	0.320984	0.135246	1.98311	0.177541	1.28377	-1.50361
3.16667	-1.22377	0.570984	0.320984	0.135246	1.96311	0.317541	0.91377	-1.21361
3.18333	-1.23377	0.610984	0.320984	0.105246	2.10311	0.297541	0.83377	-1.01361
3.2	-1.23377	0.620984	0.280984	-0.00475	2.17312	0.277541	0.80377	-1.08361
3.21667	-1.22377	0.700984	0.260984	-0.18475	2.29311	0.287541	0.78377	-1.13361
3.23333	-1.24377	1.16098	0.330984	-0.40475	2.41311	0.257541	0.79377	-1.12361
3.25	-1.29377	1.30098	0.310984	-0.37475	2.53312	0.147541	0.67377	-1.04361
3.26667	-1.31377	1.42098	0.270984	-0.03475	2.62311	0.047541	0.48377	-0.98361
3.28333	-1.25377	1.52098	0.190984	0.075246	2.59312	-0.07246	0.42377	-0.92361
3.3	-0.83377	1.53098	0.220984	0.085246	2.45311	-0.21246	0.37377	-0.88361
3.31667	-0.57377	1.56098	0.360984	0.265246	2.35311	-0.33246	0.34377	-0.85361
3.33333	-0.57377	1.67098	0.410984	0.355246	2.22311	-0.37246	0.32377	-0.94361
3.35	-0.52377	1.70098	0.430984	0.395246	2.22311	-0.38246	0.31377	-1.00361
3.36667	-0.62377	1.70098	0.440984	0.545246	2.21312	-0.37246	0.30377	-0.98361
3.38333	-0.99377	1.59098	0.440984	1.04525	2.07312	-0.43246	0.32377	-1.03361
3.4	-1.02377	1.36098	0.380984	1.67525	1.98311	-0.49246	0.37377	-1.01361
3.41667	-1.03377	1.37098	0.280984	1.95525	1.94311	-0.53246	0.38377	-0.90361
3.43333	-1.16377	1.39098	0.260984	1.92525	1.93311	-0.56246	0.36377	-0.90361
3.45	-1.59377	1.28098	0.330984	1.85525	2.01311	-0.62246	0.30377	-0.95361
3.46667	-1.72377	1.31098	0.410984	1.86525	2.10311	-0.64246	0.32377	-0.99361
3.48333	-1.79377	1.33098	0.470984	1.92525	2.21312	-0.63246	0.29377	-1.06361
3.5	-1.82377	1.33098	0.530984	1.88525	2.30312	-0.62246	0.02377	-1.15361
3.51667	-1.77377	1.17098	0.690984	1.87525	2.42312	-0.65246	-0.09623	-1.22361
3.53333	-1.63377	1.10098	0.860984	1.87525	2.27312	-0.71246	-0.16623	-1.25361
3.55	-1.56377	0.940984	0.830984	1.92525	1.92311	-0.77246	-0.20623	-1.20361
3.56667	-1.51377	0.830984	0.650984	1.97525	1.63312	-0.76246	-0.19623	-1.13361
3.58333	-1.42377	0.860984	0.640984	1.92525	1.48311	-0.74246	0.02377	-1.06361
3.6	-1.28377	0.860984	0.650984	1.82525	1.41311	-0.75246	0.13377	-1.02361
3.61667	-1.23377	0.790984	0.660984	1.80525	1.24311	-0.77246	0.12377	-0.99361
3.63333	-1.23377	0.620984	0.670984	1.80525	1.23311	-0.75246	0.17377	-0.99361
3.65	-1.33377	0.560984	0.640984	1.71525	1.34312	-0.73246	0.18377	-0.99361
3.66667	-1.42377	0.530984	0.540984	1.62525	1.51311	-0.70246	0.16377	-0.99361
3.68333	-1.46377	0.550984	0.570984	1.58525	1.59312	-0.71246	0.15377	-0.96361
3.7	-1.49377	0.560984	0.570984	1.55525	1.88312	-0.72246	0.22377	-0.89361
3.71667	-1.51377	0.540984	0.520984	1.28525	1.98311	-0.72246	0.28377	-0.76361
3.73333	-1.49377	0.460984	0.490984	0.515246	1.84312	-0.73246	0.40377	-0.67361
3.75	-1.29377	0.460984	0.420984	0.445246	1.67311	-0.75246	0.46377	-0.58361
3.76667	-1.06377	0.360984	0.360984	0.475246	1.65311	-0.76246	0.43377	-0.54361
3.78333	-0.80377	0.370984	0.480984	0.345246	1.68311	-0.79246	0.29377	-0.55361
3.8	-0.78377	0.400984	0.400984	0.075246	1.74311	-0.77246	0.26377	-0.54361
3.81667	-0.79377	0.410984	0.160984	-0.11475	1.83312	-0.74246	0.26377	-0.51361
3.83333	-0.83377	0.410984	0.110984	-0.21475	1.89312	-0.80246	0.26377	-0.50361
3.85	-0.97377	0.400984	0.040984	-0.23475	1.57312	-0.86246	0.33377	-0.49361
3.86667	-1.23377	0.400984	-0.02902	0.165246	1.75311	-0.93246	0.43377	-0.42361
3.88333	-1.30377	0.390984	-0.07902	0.325246	1.84312	-0.94246	0.38377	-0.24361
3.9	-1.38377	0.380984	-0.07902	0.605246	1.76311	-0.96246	0.35377	0.116393
3.91667	-1.37377	0.400984	-0.12902	0.715246	1.75311	-0.89246	0.35377	0.146393
3.93333	-1.25377	0.480984	-0.20902	0.835246	1.85312	-0.73246	0.38377	0.096393
3.95	-1.14377	0.610984	-0.28902	1.00525	1.89312	-0.62246	-0.11623	0.116393
3.96667	-1.09377	0.610984	-0.31902	1.05525	1.86312	-0.52246	-0.23623	0.066393
3.98333	-1.03377	0.660984	-0.36902	1.04525	1.88312	-0.44246	-0.29623	0.006393
4	-1.03377	0.650984	-0.42902	0.905246	1.78312	-0.34246	-0.34623	0.086393
4.01667	-1.04377	0.700984	-0.45902	0.355246	1.46311	-0.24246	-0.38623	0.056393
4.03333	-1.02377	0.770984	-0.45902	-0.20475	1.34312	-0.21246	-0.55623	0.056393
4.05	-0.72377	0.790984	-0.42902	-0.19475	1.31312	-0.16246	-0.66623	0.166393
4.06667	-0.57377	0.770984	-0.40902	0.215246	1.31312	-0.11246	-0.81623	0.286393
4.08333	-0.57377	0.710984	-0.43902	0.555246	1.35312	-0.07246	-0.93623	0.416393
4.1	-0.56377	0.570984	-0.42902	0.825246	1.42311	-0.00246	-1.10623	0.596393
4.11667	-0.50377	0.550984	-0.37902	0.785246	1.43311	0.087541	-1.21623	0.726393
4.13333	-0.40377	0.580984	-0.38902	0.655246	1.42311	0.067541	-1.26623	0.676393
4.15	-0.26377	0.680984	-0.25902	0.635246	1.38312	0.007541	-1.27623	0.536393
4.16667	-0.18377	0.720984	-0.25902	0.755246	1.30312	-0.06246	-1.31623	0.436393
4.18333	-0.16377	0.700984	-0.29902	1.05525	1.41311	-0.10246	-1.40623	0.426393
4.2	-0.18377	0.560984	0.020984	1.16525	1.61312	-0.38246	-1.44623	0.416393
4.21667	-0.27377	0.440984	0.220984	1.19525	1.66311	-0.66246	-1.47623	0.366393
4.23333	-0.43377	0.330984	0.220984	1.24525	1.66311	-0.68246	-1.52623	0.286393
4.25	-0.46377	0.410984	0.230984	1.25525	1.62312	-0.35246	-1.53623	0.476393
4.26667	-0.47377	0.960984	0.360984	1.22525	1.57312	-0.19246	-1.46623	0.666393
4.28333	-0.58377	1.17098	0.470984	1.25525	1.50311	-0.35246	-1.43623	0.616393
4.3	-0.81377	1.21098	0.510984	1.28525	1.41311	-0.57246	-1.39623	0.626393
4.31667	-0.95377	1.24098	0.680984	1.28525	1.30312	-0.67246	-1.46623	0.656393
4.33333	-1.09377	1.04098	0.850984	1.34525	1.26311	-1.04246	-1.55623	0.706393
4.35	-1.41377	0.940984	0.860984	1.59525	1.22311	-1.34246	-1.56623	0.696393
4.36667	-1.77377	0.860984	0.810984	1.69525	1.25311	-1.46246	-1.64623	0.676393
4.38333	-1.89377	0.810984	0.810984	1.60525	1.31312	-1.51246	-1.85623	0.676393
4.4	-1.72377	0.810984	0.850984	1.30525	1.36312	-1.40246	-1.97623	0.576393
4.41667	-1.50377	0.790984	1.24098	1.32525	1.39312	-1.33246	-2.08623	0.636393
4.43333	-1.50377	0.810984	1.39098	1.37525	1.45311	-1.24246	-2.07623	0.736393
4.45	-1.57377	0.880984	1.44098	1.35525	1.48311	-1.04246	-1.92623	0.716393
4.46667	-1.45377	0.910984	1.49098	1.30525	1.47311	-0.95246	-1.92623	0.656393
4.48333	-1.23377	0.900984	1.47098	1.25525	1.51311	-0.91246	-1.93623	0.666393
4.5	-1.11377	0.860984	1.46098	1.19525	1.41311	-0.85246	-1.91623	0.686393
4.51667	-0.77377	0.780984	1.43098	1.01525	1.20311	-0.60246	-1.76623	0.676393
4.53333	-0.47377	0.640984	1.32098	0.835246	1.00311	-0.57246	-1.69623	0.596393
4.55	-0.22377	0.510984	1.28098	0.795246	1.04312	-0.57246	-1.84623	0.416393
4.56667	-0.10377	0.490984	1.12098	0.795246	0.973115	-0.34246	-1.93623	0.336393
4.58333	0.08623	0.490984	0.890984	0.895246	1.11312	-0.15246	-1.89623	0.326393
4.6	0.17623	0.490984	0.750984	0.835246	1.21311	0.137541	-1.54623	0.306393
4.61667	0.35623	0.520984	0.790984	0.685246	1.48311	0.597541	-1.29623	0.306393
4.63333	0.45623	0.760984	0.940984	0.685246	1.56312	0.677541	-1.10623	0.306393
4.65	0.69623	0.820984	1.01098	0.875246	1.58312	0.757541	-0.94623	0.456393
4.66667	0.79623	0.820984	0.960984	1.11525	1.58312	0.827541	-0.73623	0.596393
4.68333	0.62623	0.830984	0.700984	1.15525	1.55312	0.817541	-0.65623	0.596393
4.7	0.66623	0.840984	0.540984	1.01525	1.57312	0.647541	-0.88623	0.596393
4.71667	0.71623	1.06098	0.530984	0.705246	1.63312	0.397541	-0.86623	0.756393
4.73333	0.66623	1.17098	0.510984	0.435246	1.99311	0.707541	-0.75623	0.786393
4.75	0.54623	1.14098	0.410984	0.435246	2.36312	1.08754	-0.52623	0.686393
4.76667	0.31623	1.07098	0.290984	0.545246	2.49311	1.41754	-0.40623	0.636393
4.78333	0.18623	0.880984	0.330984	0.795246	2.48312	1.48754	-0.34623	0.596393
4.8	0.11623	0.380984	0.350984	0.995246	2.50312	1.55754	-0.33623	0.556393
4.81667	0.13623	0.320984	0.310984	0.795246	2.53312	1.64754	-0.34623	0.676393
4.83333	0.08623	0.290984	0.280984	0.225246	2.55312	1.64754	-0.37623	0.886393
4.85	0.07623	0.330984	0.150984	-0.35475	2.55312	1.63754	-0.44623	0.906393
4.86667	0.15623	0.360984	-0.04902	-0.75475	2.53312	1.59754	-0.48623	0.746393
4.88333	0.14623	0.310984	-0.13902	-0.97475	2.34312	1.52754	-0.52623	0.466393
4.9	0.16623	0.330984	-0.47902	-1.18475	2.09312	1.34754	-0.53623	0.326393
4.91667	0.16623	0.720984	-0.77902	-1.24475	2.14311	1.11754	-0.66623	0.256393
4.93333	0.16623	0.720984	-0.75902	-1.25475	2.29311	0.737541	-0.70623	0.246393
4.95	0.11623	0.670984	-0.72902	-1.12475	2.52312	0.437541	-0.76623	0.216393
4.96667	0.08623	0.680984	-0.63902	-0.60475	2.77312	0.147541	-0.83623	0.226393
4.98333	0.16623	0.650984	-0.41902	-0.24475	3.04311	-0.06246	-0.93623	0.316393
5	0.48623	0.630984	-0.12902	-0.03475	3.10311	-0.21246	-0.99623	0.336393
5.01667	0.54623	0.660984	0.060984	0.015246	3.11312	-0.36246	-1.04623	0.296393
5.03333	0.62623	0.720984	0.350984	-0.07475	3.13312	-0.51246	-1.10623	0.326393
5.05	0.47623	0.810984	0.480984	-0.18475	3.15312	-0.59246	-1.12623	0.366393
5.06667	0.42623	0.880984	0.470984	-0.22475	3.27312	-0.61246	-1.18623	0.386393
5.08333	0.41623	0.940984	0.600984	-0.14475	3.29311	-0.62246	-1.21623	0.246393
5.1	0.30623	0.980984	0.870984	-0.10475	3.04311	-0.63246	-1.26623	0.186393
5.11667	0.30623	0.750984	0.970984	-0.04475	2.88312	-0.61246	-1.28623	0.586393
5.13333	0.48623	0.780984	0.910984	-0.10475	2.71312	-0.60246	-1.23623	0.626393
5.15	-0.48377	0.930984	0.840984	-0.21475	2.67312	-0.68246	-1.09623	0.606393
5.16667	-1.29377	0.770984	0.860984	-0.20475	2.66311	-0.82246	-0.98623	0.596393
5.18333	-1.41377	0.650984	0.890984	-0.12475	2.52312	-0.96246	-1.01623	0.586393
5.2	-1.54377	0.560984	1.01098	-0.13475	2.21312	-1.06246	-1.08623	0.576393
5.21667	-1.90377	0.450984	1.13098	-0.21475	1.98311	-1.16246	-1.15623	0.576393
5.23333	-2.03377	0.420984	1.17098	-0.34475	1.85312	-1.15246	-1.21623	0.516393
5.25	-2.09377	0.430984	1.24098	-0.42475	1.72311	-1.13246	-1.23623	0.496393
5.26667	-2.17377	0.380984	1.31098	-0.45475	1.67311	-1.14246	-1.21623	0.536393
5.28333	-2.21377	0.440984	1.25098	-0.40475	1.62312	-1.16246	-1.13623	0.516393
5.3	-2.22377	0.460984	1.26098	-0.42475	1.81312	-1.14246	-0.85623	0.606393
5.31667	-2.18377	0.400984	1.28098	-0.47475	2.16311	-1.02246	-0.78623	0.706393
5.33333	-2.18377	0.340984	1.32098	-0.54475	2.22311	-0.89246	-0.78623	0.746393
5.35	-2.17377	0.280984	1.41098	-0.42475	2.27312	-0.84246	-0.80623	0.786393
5.36667	-2.16377	0.220984	1.31098	0.025246	2.32312	-0.81246	-0.87623	0.826393
5.38333	-2.15377	0.170984	1.20098	0.235246	2.40312	-0.74246	-0.93623	0.896393
5.4	-2.12377	0.230984	1.28098	0.085246	2.63312	-0.67246	-0.82623	0.936393
5.41667	-2.10377	0.290984	1.26098	-0.15475	2.56311	-0.59246	-0.39623	0.976393
5.43333	-2.08377	0.270984	1.18098	-0.16475	2.55312	-0.54246	-0.26623	1.06639
5.45	-2.04377	0.270984	0.920984	0.035246	2.49311	-0.46246	-0.22623	1.08639
5.46667	-2.04377	0.390984	0.840984	0.125246	2.37311	-0.41246	-0.21623	1.06639
5.48333	-2.06377	0.270984	0.880984	0.205246	2.25312	-0.39246	-0.23623	1.08639
5.5	-2.07377	0.240984	0.940984	0.215246	2.08311	-0.42246	-0.24623	0.926393
5.51667	-2.09377	0.350984	0.960984	0.325246	2.20311	-0.46246	-0.23623	0.926393
5.53333	-2.09377	0.340984	0.920984	0.485246	2.27312	-0.39246	-0.34623	1.12639
5.55	-2.09377	0.340984	0.880984	0.605246	2.08311	-0.37246	-0.31623	1.14639
5.56667	-2.10377	0.420984	0.840984	0.695246	1.75311	-0.41246	-0.21623	1.03639
5.58333	-2.17377	0.460984	0.780984	0.725246	1.55312	-0.43246	-0.18623	0.906393
5.6	-2.32377	0.370984	0.780984	0.665246	1.39312	-0.30246	-0.14623	0.766393
5.61667	-2.35377	0.170984	0.790984	0.875246	1.32312	-0.23246	-0.10623	0.626393
5.63333	-2.24377	-0.13902	0.700984	1.08525	1.43311	-0.21246	-0.13623	0.586393
5.65	-2.12377	-0.28902	0.580984	1.25525	1.50311	-0.18246	-0.26623	0.566393
5.66667	-2.05377	-0.30902	0.520984	1.35525	1.55312	-0.16246	-0.31623	0.516393
5.68333	-2.01377	-0.16902	0.560984	1.29525	1.62312	-0.17246	-0.32623	0.486393
5.7	-1.82377	-0.04902	0.540984	1.23525	1.70311	-0.20246	-0.33623	0.586393
5.71667	-1.55377	-0.01902	0.510984	1.22525	1.82312	-0.23246	-0.35623	0.646393
5.73333	-1.40377	0.140984	0.520984	0.965246	1.89312	-0.26246	-0.38623	0.636393
5.75	-1.26377	0.260984	0.520984	0.575246	2.00312	-0.28246	-0.46623	0.636393
5.76667	-1.25377	0.120984	0.520984	0.365246	2.05312	-0.29246	-0.50623	0.516393
5.78333	-1.55377	-0.00902	0.440984	0.455246	2.09312	-0.31246	-0.46623	0.366393
5.8	-1.69377	-0.31902	0.370984	0.555246	2.19312	-0.40246	-0.12623	0.296393
5.81667	-1.77377	-0.44902	0.410984	0.545246	2.29311	-0.54246	-0.04623	0.286393
5.83333	-1.76377	-0.35902	0.410984	0.425246	2.40312	-0.62246	-0.06623	0.216393
5.85	-1.70377	-0.29902	0.350984	0.485246	2.48312	-0.71246	0.01377	0.136393
5.86667	-1.68377	-0.39902	0.280984	0.535246	2.57312	-0.78246	0.00377	0.106393
5.88333	-1.66377	-0.79902	0.270984	0.615246	2.55312	-0.81246	-0.02623	0.086393
5.9	-1.66377	-0.93902	0.460984	0.625246	2.44312	-0.83246	-0.04623	-0.02361
5.91667	-1.66377	-1.14902	0.560984	0.765246	2.26311	-0.81246	-0.08623	-0.16361
5.93333	-1.67377	-1.36902	0.550984	0.815246	2.07312	-0.76246	-0.25623	-0.22361
5.95	-1.66377	-1.41902	0.510984	0.505246	1.95311	-0.76246	-0.35623	-0.26361
5.96667	-1.68377	-1.48902	0.560984	0.315246	1.92311	-0.78246	-0.28623	-0.26361
5.98333	-1.71377	-1.66902	0.590984	0.265246	1.78312	-0.81246	-0.21623	-0.25361
6	-1.79377	-1.68902	0.390984	0.205246	1.58312	-0.82246	-0.18623	-0.24361

## Sheet: Tg(Avil-CreERT2) AMG517
Time	Trpv1fl/fl	Trpv1fl/fl	Trpv1fl/fl	Trpv1fl/fl	Tg(Avil-CreERT2);Trpv1fl/fl	Tg(Avil-CreERT2);Trpv1fl/fl	Tg(Avil-CreERT2);Trpv1fl/fl
	U015	U342	U345	U747	U012	U343	U748
-1		0.293443	0.080055	-0.67197		0.156011	-0.45809
-0.98333		0.223443	0.010055	-0.63697		0.119344	-0.53142
-0.96667		0.173443	-0.02328	-0.48697		0.146011	-0.52475
-0.95		0.146776	-0.03995	-0.39697		0.156011	-0.49475
-0.93333		0.100109	-0.04995	-0.10697		0.096011	-0.48475
-0.91667		0.050109	-0.07995	0.133033		0.039344	-0.46142
-0.9		0.016776	-0.13995	0.218033		0.016011	-0.41142
-0.88333		-0.02322	-0.15328	0.453033		0.006011	-0.33809
-0.86667		-0.05989	-0.09995	0.573033		-0.03732	-0.30475
-0.85		-0.10656	-0.09661	0.588033		-0.12732	-0.23475
-0.83333		-0.13656	-0.12661	0.553033		-0.13399	-0.21475
-0.81667	0.101019	-0.18656	-0.15328	0.488033	0.029537	-0.17066	-0.19809
-0.8	0.104352	-0.25656	-0.16995	0.473033	-0.01546	-0.13066	-0.14475
-0.78333	0.109907	-0.33656	-0.21995	0.403033	-0.04713	-0.13066	-0.11142
-0.76667	0.125185	-0.41656	-0.23995	0.318033	-0.0638	-0.20066	-0.04475
-0.75	0.147019	-0.50656	-0.23661	0.263033	-0.0738	-0.20399	0.065246
-0.73333	0.168796	-0.55322	-0.16328	0.208033	-0.08102	-0.29066	0.101913
-0.71667	0.197209	-0.58656	-0.12995	0.103033	-0.08713	-0.26732	0.118579
-0.7	0.218519	-0.59989	-0.17995	0.088033	-0.08796	-0.20066	0.121913
-0.68333	0.227685	-0.60989	-0.17661	0.098033	-0.08528	-0.15732	0.121913
-0.66667	0.231019	-0.63322	-0.07995	0.058033	-0.08146	-0.17732	0.148579
-0.65	0.225261	-0.65322	-0.03995	-0.01697	-0.08349	-0.17066	0.211913
-0.63333	0.214907	-0.67989	-0.17995	0.003033	-0.08963	-0.18732	0.245246
-0.61667	0.201275	-0.69322	-0.30661	0.038033	-0.09867	-0.19399	0.265246
-0.6	0.185304	-0.68322	-0.37328	-0.02197	-0.10856	-0.20732	0.271913
-0.58333	0.172352	-0.67322	-0.43661	-0.06697	-0.11446	-0.14399	0.278579
-0.56667	0.164769	-0.64656	-0.49995	-0.00697	-0.10921	-0.08399	0.248579
-0.55	0.159646	-0.59656	-0.51328	0.073033	-0.10242	-0.02732	0.231913
-0.53333	0.156574	-0.50656	-0.43995	-0.01197	-0.09676	0.012678	0.218579
-0.51667	0.152773	-0.43989	-0.21661	-0.11197	-0.08871	0.032678	0.211913
-0.5	0.148852	-0.33989	-0.16661	-0.23697	-0.07746	0.079344	0.235246
-0.48333	0.146892	-0.28656	-0.14995	-0.27697	-0.06046	0.116011	0.265246
-0.46667	0.144806	-0.24656	-0.11995	-0.28697	-0.04198	0.142678	0.281913
-0.45	0.138555	-0.16989	-0.10995	-0.29697	-0.0238	0.149344	0.265246
-0.43333	0.13088	-0.13656	-0.00661	-0.31197	-0.00824	0.142678	0.238579
-0.41667	0.122219	-0.11322	0.083388	-0.33197	0.003937	0.166011	0.221913
-0.4	0.110762	-0.08989	0.136721	-0.34197	0.013768	0.156011	0.175246
-0.38333	0.096451	-0.06322	0.143388	-0.30697	0.022377	0.136011	0.158579
-0.36667	0.082566	0.026776	0.160055	-0.33197	0.028109	0.119344	0.158579
-0.35	0.070559	0.140109	0.216721	-0.30697	0.031606	0.099344	0.171913
-0.33333	0.059685	0.193443	0.250055	-0.16697	0.03287	0.072678	0.165246
-0.31667	0.044463	0.270109	0.270055	-0.12197	0.031982	0.042678	0.135246
-0.3	0.030019	0.336776	0.310055	-0.00697	0.031315	0.012678	0.101913
-0.28333	0.017463	0.353443	0.346721	0.113033	0.030982	-0.02399	0.058579
-0.26667	0.002463	0.350109	0.346721	0.158033	0.028204	-0.05066	0.041913
-0.25	-0.01509	0.353443	0.360055	0.098033	0.022982	-0.06399	0.028579
-0.23333	-0.03376	0.380109	0.383388	-0.00697	0.016204	-0.01732	-0.00142
-0.21667	-0.05265	0.440109	0.313388	-0.13197	0.007648	0.019344	0.055246
-0.2	-0.07054	0.523443	0.223388	-0.25197	-0.00046	0.022678	0.035246
-0.18333	-0.08798	0.536776	0.210055	-0.25697	-0.00769	0.036011	-0.01142
-0.16667	-0.10632	0.530109	0.210055	-0.16697	-0.01446	0.049344	-0.07142
-0.15	-0.1182	0.600109	0.190055	-0.12697	-0.00935	0.059344	-0.11142
-0.13333	-0.13276	0.623443	0.246721	-0.07697	-0.00213	0.082678	-0.06809
-0.11667	-0.14309	0.653443	0.216721	0.063033	0.00287	0.089344	-0.05475
-0.1	-0.14687	0.693443	0.190055	-0.00197	0.004981	0.066011	0.035246
-0.08333	-0.15032	0.656776	0.223388	-0.04197	0.009648	0.022678	0.011913
-0.06667	-0.15754	0.610109	0.250055	0.088033	0.011759	0.072678	-0.03142
-0.05	-0.16787	0.646776	0.230055	0.258033	0.011426	0.109344	-0.05142
-0.03333	-0.18043	0.676776	0.193388	0.358033	0.004537	0.142678	-0.10142
-0.01667	-0.19209	0.690109	0.170055	0.343033	-0.01035	0.182678	-0.11142
0	-0.20265	0.740109	0.153388	0.313033	-0.02102	0.229344	-0.13142
0.016667	-0.21054	0.806776	0.103388	0.183033	-0.03402	0.246011	-0.11142
0.033333	-0.21309	0.796776	0.023388	-0.27697	-0.05835	0.222678	-0.07475
0.05	-0.20987	0.780109	0.006721	-0.02197	-0.08669	0.156011	-0.30809
0.066667	-0.20309	0.763443	0.043388	0.123033	-0.11069	0.049344	-0.40809
0.083333	-0.19243	0.783443	-0.01661	0.278033	-0.13324	0.082678	-0.41809
0.1	-0.17698	0.826776	-0.45328	0.423033	-0.15357	0.289344	-0.34809
0.116667	-0.15443	0.863443	-0.22661	0.608033	-0.17569	0.346011	-0.37142
0.133333	-0.12665	0.896776	-0.44661	0.708033	-0.20002	0.282678	-0.38809
0.15	-0.09654	0.803443	-0.39661	0.693033	-0.22924	0.222678	-0.49142
0.166667	-0.06443	0.760109	-0.40995	0.753033	-0.26046	0.119344	-0.69142
0.183333	-0.0302	0.793443	-0.44995	0.598033	-0.28435	0.099344	-0.64142
0.2	0.000907	0.776776	-0.36661	0.743033	-0.30324	0.056011	-0.69809
0.216667	0.028685	0.736776	-0.19995	1.26303	-0.32202	-0.09399	-0.82475
0.233333	0.056019	0.623443	-0.14661	1.66803	-0.33846	-0.14066	-0.79475
0.25	0.082241	0.570109	-0.23328	1.75803	-0.35302	-0.13732	-0.65809
0.266667	0.106796	0.553443	-0.26995	1.71303	-0.36157	-0.12066	-0.57142
0.283333	0.131463	0.630109	-0.24995	1.86803	-0.36413	-0.03732	-0.64475
0.3	0.155574	0.713443	-0.20661	2.04803	-0.36669	0.082678	-0.76142
0.316667	0.180019	0.703443	-0.13661	2.12803	-0.37046	0.026011	-0.71809
0.333333	0.20513	0.713443	-0.06995	2.06303	-0.38191	-0.16066	-0.63142
0.35	0.229796	0.736776	-0.08328	1.90303	-0.41235	-0.23399	-0.57809
0.366667	0.258352	0.800109	-0.01661	1.74803	-0.44657	-0.27399	-0.54809
0.383333	0.27913	0.906776	-0.00661	1.84803	-0.48091	-0.36066	-0.58142
0.4	0.292352	0.940109	0.003388	1.97303	-0.51346	-0.44732	-0.72475
0.416667	0.30613	0.863443	0.090055	1.98303	-0.54946	-0.39066	-0.81142
0.433333	0.323574	0.806776	0.146721	1.81803	-0.58757	-0.32399	-0.82475
0.45	0.343685	0.803443	0.200055	1.66803	-0.62391	-0.20732	-0.59809
0.466667	0.370907	0.800109	0.183388	1.48303	-0.65091	-0.20732	-0.65142
0.483333	0.402019	0.823443	0.170055	1.49303	-0.66913	-0.17732	-0.75475
0.5	0.431685	0.843443	0.290055	1.63303	-0.69524	-0.29066	-0.73142
0.516667	0.458019	0.853443	0.330055	1.83303	-0.7228	-0.33732	-0.69142
0.533333	0.480019	0.896776	0.253388	1.84303	-0.73391	-0.44066	-0.58142
0.55	0.499907	0.873443	0.176721	1.68803	-0.72946	-0.50732	-0.50475
0.566667	0.514574	0.850109	0.090055	1.46803	-0.72046	-0.56399	-0.42475
0.583333	0.522907	0.883443	0.120055	1.25303	-0.7068	-0.64732	-0.34475
0.6	0.527463	0.883443	0.130055	1.28303	-0.69035	-0.71066	-0.33475
0.616667	0.530019	0.876776	0.070055	1.34303	-0.67024	-0.70399	-0.37809
0.633333	0.530574	0.853443	0.013388	1.47303	-0.64802	-0.73399	-0.41475
0.65	0.528019	0.846776	-0.06995	1.55803	-0.62235	-0.71399	-0.41475
0.666667	0.523463	0.840109	-0.19995	1.61803	-0.59024	-0.73399	-0.44809
0.683333	0.51713	0.770109	-0.24328	1.61303	-0.55846	-0.87732	-0.50142
0.7	0.508463	0.740109	-0.24661	1.53303	-0.53113	-0.97732	-0.60809
0.716667	0.499241	0.810109	-0.33661	1.71303	-0.50646	-0.98399	-0.68809
0.733333	0.489907	0.920109	-0.40328	1.74303	-0.48357	-0.85066	-0.69809
0.75	0.478574	0.966776	-0.43995	1.43803	-0.45991	-0.70732	-0.69475
0.766667	0.468796	0.980109	-0.40995	1.17803	-0.44135	-0.70399	-0.74142
0.783333	0.454907	1.06011	-0.28661	0.963033	-0.43046	-0.65066	-0.75475
0.8	0.440352	1.12344	-0.15328	0.933033	-0.42757	-0.63732	-0.67809
0.816667	0.425241	1.17678	-0.13995	1.18303	-0.43535	-0.62066	-0.64475
0.833333	0.412352	1.21678	-0.17995	1.30303	-0.4398	-0.61732	-0.67142
0.85	0.398463	1.25344	-0.12328	1.39303	-0.4378	-0.59066	-0.70142
0.866667	0.388463	1.30011	0.010055	1.45803	-0.4348	-0.54399	-0.66142
0.883333	0.389796	1.35678	0.120055	1.49803	-0.42835	-0.50066	-0.60142
0.9	0.399796	1.40678	0.236721	1.54303	-0.41824	-0.43066	-0.48475
0.916667	0.408907	1.40011	0.320055	1.54303	-0.4078	-0.33066	-0.52475
0.933333	0.416463	1.27011	0.383388	1.57303	-0.3978	-0.23732	-0.59809
0.95	0.426352	1.23011	0.420055	1.65303	-0.3868	-0.12399	-0.62142
0.966667	0.43213	1.20678	0.433388	1.73303	-0.37702	-0.09066	-0.65809
0.983333	0.433796	1.18011	0.466721	1.61803	-0.36569	-0.07732	-0.71809
1	0.436019	1.22011	0.480055	1.43803	-0.34957	-0.07732	-0.85142
1.01667	0.438241	1.23011	0.500055	1.34803	-0.33246	-0.06399	-0.82142
1.03333	0.43913	1.18678	0.510055	1.16803	-0.32135	0.026011	-0.72142
1.05	0.439907	1.15678	0.476721	0.953033	-0.32091	0.139344	-0.77809
1.06667	0.444463	1.17678	0.426721	0.778033	-0.32669	0.122678	-1.03809
1.08333	0.452796	1.15678	0.376721	0.488033	-0.33246	0.012678	-1.18809
1.1	0.462463	1.11011	0.360055	0.408033	-0.34024	0.079344	-1.29475
1.11667	0.468463	1.10344	0.340055	0.518033	-0.34913	0.209344	-1.32809
1.13333	0.469463	1.10344	0.223388	0.683033	-0.3538	0.109344	-1.30809
1.15	0.471685	1.06678	0.110055	0.873033	-0.35446	0.086011	-1.27475
1.16667	0.474463	1.11678	0.060055	0.848033	-0.35735	0.082678	-1.24142
1.18333	0.479241	1.15011	0.003388	0.738033	-0.36513	0.106011	-1.20475
1.2	0.487796	1.15678	-0.02995	0.568033	-0.37113	0.136011	-1.20475
1.21667	0.500352	1.14011	-0.03328	0.368033	-0.36946	0.149344	-1.18809
1.23333	0.517019	1.11344	-0.05995	0.333033	-0.36469	0.119344	-1.13809
1.25	0.538463	1.06344	-0.11661	0.448033	-0.36024	0.152678	-1.04809
1.26667	0.559685	1.08011	0.020055	0.438033	-0.35624	0.279344	-1.01142
1.28333	0.581574	1.09344	0.113388	0.388033	-0.34913	0.376011	-0.98809
1.3	0.603685	1.13011	0.160055	0.368033	-0.33602	0.369344	-0.96809
1.31667	0.623463	1.26011	0.226721	0.378033	-0.31391	0.372678	-0.97142
1.33333	0.641019	1.36678	0.263388	0.323033	-0.28946	0.366011	-0.97809
1.35	0.655352	1.43011	0.203388	0.163033	-0.26224	0.379344	-1.01809
1.36667	0.665241	1.42011	0.256721	0.083033	-0.23157	0.396011	-1.03142
1.38333	0.668019	1.38011	0.430055	0.013033	-0.20013	0.376011	-1.06475
1.4	0.66413	1.37344	0.290055	0.048033	-0.17002	0.119344	-1.07809
1.41667	0.658796	1.37011	0.193388	0.098033	-0.14002	0.092678	-1.08475
1.43333	0.652352	1.33678	0.446721	0.133033	-0.10935	0.142678	-1.08809
1.45	0.642574	1.28678	0.560055	0.123033	-0.08035	0.096011	-1.06809
1.46667	0.630019	1.28344	0.180055	0.098033	-0.05602	-0.03399	-1.03809
1.48333	0.615574	1.26678	0.193388	0.123033	-0.03724	-0.12732	-0.97809
1.5	0.601685	1.22344	0.160055	0.133033	-0.02235	-0.15732	-0.94142
1.51667	0.59013	1.18344	0.043388	0.123033	-0.00824	-0.21399	-0.92475
1.53333	0.580463	1.16011	-0.02328	0.158033	0.005315	-0.31732	-1.10142
1.55	0.570907	1.14344	-0.06328	0.238033	0.018648	-0.37399	-1.38809
1.56667	0.562463	1.14011	-0.08995	0.308033	0.030982	-0.42732	-1.43142
1.58333	0.554463	1.01678	-0.13661	0.413033	0.039648	-0.42399	-1.48475
1.6	0.547685	0.950109	-0.14661	0.428033	0.047426	-0.39732	-1.54142
1.61667	0.542685	0.876776	-0.13661	0.248033	0.055093	-0.36399	-1.52475
1.63333	0.540241	0.896776	-0.12661	0.058033	0.061093	-0.31399	-1.44142
1.65	0.536241	0.906776	-0.10661	-0.10697	0.066204	-0.26066	-1.40809
1.66667	0.531796	0.896776	-0.08995	-0.20197	0.070093	-0.20732	-1.39142
1.68333	0.531019	1.00344	0.010055	-0.23697	0.074426	-0.20399	-1.33809
1.7	0.534574	1.00011	0.200055	-0.13197	0.079759	-0.17399	-1.32142
1.71667	0.541574	0.990109	0.266721	-0.12197	0.080537	-0.12732	-1.33809
1.73333	0.548463	1.04344	0.300055	-0.08697	0.077759	-0.13066	-1.37142
1.75	0.554574	1.12344	0.323388	0.218033	0.073982	-0.12732	-1.39475
1.76667	0.564019	1.17011	0.333388	0.478033	0.071537	-0.13066	-1.45809
1.78333	0.575352	1.11344	0.316721	0.648033	0.070759	-0.20732	-1.51142
1.8	0.588241	1.05011	0.290055	0.843033	0.071648	-0.25399	-1.51142
1.81667	0.605352	1.06011	0.256721	0.933033	0.07487	-0.28732	-1.48475
1.83333	0.62313	1.10344	0.260055	0.568033	0.075982	-0.36066	-1.47475
1.85	0.640685	1.15678	0.283388	0.413033	0.075204	-0.27732	-1.46142
1.86667	0.659574	1.16678	0.303388	0.373033	0.071759	-0.18066	-1.44809
1.88333	0.679907	1.15678	0.376721	0.373033	0.065759	-0.11732	-1.44809
1.9	0.69613	1.13344	0.516721	0.333033	0.057426	-0.10399	-1.44142
1.91667	0.710241	1.16678	0.520055	0.318033	0.048204	-0.07066	-1.45475
1.93333	0.726019	1.20344	0.366721	0.393033	0.039093	-0.03732	-1.51142
1.95	0.742019	1.23678	0.306721	0.478033	0.030537	-0.02732	-1.55809
1.96667	0.757907	1.23678	0.233388	0.548033	0.024982	-0.12732	-1.51475
1.98333	0.775907	1.22344	0.226721	0.748033	0.024426	-0.12732	-1.51475
2	0.794685	1.24344	0.256721	0.993033	0.024648	-0.08399	-1.45475
2.01667	0.811796	1.28011	0.263388	1.31803	0.023093	0.002678	-1.43809
2.03333	0.827796	1.27011	0.336721	1.25303	0.018982	0.042678	-1.55475
2.05	0.84313	1.25678	0.403388	0.973033	0.011537	-0.00732	-1.63809
2.06667	0.855463	1.24678	0.296721	0.788033	0.002204	-0.07732	-1.73809
2.08333	0.868685	1.22678	0.080055	0.763033	-0.00857	-0.20399	-1.84142
2.1	0.882463	1.20344	0.016721	0.823033	-0.02146	-0.14732	-1.92142
2.11667	0.895352	1.19011	0.066721	0.798033	-0.03613	0.016011	-2.00142
2.13333	0.906019	1.17344	0.210055	0.848033	-0.05302	0.166011	-2.11475
2.15	0.914574	1.18678	0.233388	0.953033	-0.07291	0.279344	-2.09142
2.16667	0.921796	1.19011	0.193388	1.07303	-0.09424	0.312678	-2.01809
2.18333	0.92513	1.18344	0.246721	1.14303	-0.11702	0.232678	-2.04475
2.2	0.923463	1.17011	0.303388	1.16803	-0.14191	0.176011	-2.06142
2.21667	0.915241	1.17344	0.283388	1.17303	-0.16802	0.056011	-2.03142
2.23333	0.901019	1.17011	0.193388	0.998033	-0.19157	0.032678	-1.98809
2.25	0.881907	1.18011	0.106721	0.828033	-0.21369	0.166011	-1.95142
2.26667	0.859574	1.19011	0.056721	0.673033	-0.23535	0.236011	-1.86809
2.28333	0.837352	1.20344	0.113388	0.663033	-0.25657	0.216011	-1.75809
2.3	0.813241	1.20678	0.276721	0.723033	-0.27735	0.126011	-1.70142
2.31667	0.790574	1.12011	0.370055	0.768033	-0.29946	-0.00732	-1.67142
2.33333	0.767685	1.03344	0.473388	0.768033	-0.31791	-0.12732	-1.63809
2.35	0.744019	1.00678	0.466721	0.728033	-0.33269	-0.11732	-1.62809
2.36667	0.719907	0.966776	0.450055	0.718033	-0.34502	-0.02066	-1.57809
2.38333	0.693796	0.936776	0.396721	0.693033	-0.35246	0.016011	-1.42475
2.4	0.671907	0.893443	0.343388	0.668033	-0.3538	-0.01066	-1.45142
2.41667	0.65313	0.853443	0.253388	0.638033	-0.35369	0.032678	-1.55475
2.43333	0.632796	0.896776	0.180055	0.618033	-0.35524	0.082678	-1.68142
2.45	0.611685	0.970109	0.150055	0.598033	-0.3568	-0.04066	-1.67809
2.46667	0.592574	1.03678	0.120055	0.598033	-0.35735	-0.07066	-1.61142
2.48333	0.573241	1.09011	0.080055	0.613033	-0.3618	-0.18399	-1.54142
2.5	0.556463	1.11678	0.073388	0.633033	-0.36713	-0.38066	-1.45809
2.51667	0.539907	1.13011	0.076721	0.628033	-0.3688	-0.41399	-1.38809
2.53333	0.522241	1.14344	0.053388	0.658033	-0.36691	-0.42066	-1.26809
2.55	0.502685	1.18011	0.046721	0.778033	-0.36157	-0.53066	-1.08142
2.56667	0.482685	1.19344	0.056721	0.813033	-0.35424	-0.55399	-1.01475
2.58333	0.459685	1.19344	0.066721	0.778033	-0.34391	-0.48732	-0.96475
2.6	0.434463	1.17011	0.056721	0.733033	-0.3318	-0.46732	-0.94142
2.61667	0.408796	1.12678	0.076721	0.738033	-0.31935	-0.44732	-0.91809
2.63333	0.38413	1.10678	0.086721	0.698033	-0.30491	-0.40399	-0.81475
2.65	0.359019	1.07344	0.103388	0.643033	-0.28569	-0.37066	-0.69475
2.66667	0.335241	1.07678	0.130055	0.568033	-0.26369	-0.33066	-0.62142
2.68333	0.311241	1.06678	0.163388	0.403033	-0.24102	-0.30399	-0.61142
2.7	0.285241	1.06011	0.220055	0.458033	-0.21602	-0.28399	-0.63475
2.71667	0.259907	1.05011	0.240055	0.618033	-0.19124	-0.23732	-0.61809
2.73333	0.236907	1.04344	0.246721	0.708033	-0.17069	-0.22066	-0.58142
2.75	0.21713	1.03678	0.236721	0.768033	-0.1528	-0.22066	-0.51142
2.76667	0.196685	1.02344	0.206721	0.703033	-0.13591	-0.23066	-0.46142
2.78333	0.174463	1.01344	0.186721	0.733033	-0.12257	-0.26066	-0.44809
2.8	0.156352	1.00344	0.173388	0.738033	-0.1118	-0.23732	-0.45475
2.81667	0.138907	0.970109	0.163388	0.753033	-0.1008	-0.22399	-0.43142
2.83333	0.12413	0.923443	0.166721	0.793033	-0.08913	-0.24399	-0.43475
2.85	0.110685	0.910109	0.173388	0.778033	-0.07946	-0.21399	-0.50142
2.86667	0.096352	0.940109	0.133388	0.638033	-0.07191	-0.14399	-0.55475
2.88333	0.08613	0.950109	0.076721	0.458033	-0.06791	-0.13066	-0.63142
2.9	0.076463	0.940109	0.086721	0.218033	-0.0698	-0.13066	-0.70475
2.91667	0.063463	0.973443	0.156721	0.063033	-0.07424	-0.12399	-0.76475
2.93333	0.046796	1.01011	0.333388	-0.01197	-0.07813	-0.19066	-0.76142
2.95	0.029907	0.993443	0.440055	-0.12697	-0.07824	-0.22399	-0.81809
2.96667	0.012907	1.02011	0.396721	-0.10197	-0.07769	-0.22066	-0.86809
2.98333	-0.00243	1.06344	0.350055	0.078033	-0.07546	-0.21732	-0.78142
3	-0.0212	1.01344	0.233388	0.198033	-0.06891	-0.19732	-0.76475
3.01667	-0.04209	0.940109	0.173388	0.248033	-0.06002	-0.18066	-0.72142
3.03333	-0.06276	0.813443	0.106721	0.308033	-0.05069	-0.23732	-0.69475
3.05	-0.08154	0.873443	0.013388	0.343033	-0.04091	-0.20732	-0.65142
3.06667	-0.0982	0.996776	0.006721	0.353033	-0.02891	-0.15399	-0.65809
3.08333	-0.1132	1.02344	0.130055	0.313033	-0.01546	-0.15732	-0.67475
3.1	-0.12665	1.03344	0.160055	0.278033	0.000981	-0.15066	-0.63475
3.11667	-0.1362	1.06344	0.186721	0.293033	0.020648	-0.14732	-0.51142
3.13333	-0.14354	1.06344	0.213388	0.268033	0.04087	-0.15732	-0.41142
3.15	-0.14765	1.07344	0.300055	0.028033	0.059648	-0.16399	-0.46142
3.16667	-0.15209	1.09678	0.363388	-0.13697	0.078315	-0.18732	-0.47809
3.18333	-0.15398	1.15344	0.443388	-0.22197	0.098204	-0.20066	-0.35809
3.2	-0.15165	1.19678	0.320055	0.033033	0.11887	-0.18732	-0.30142
3.21667	-0.15065	1.17011	0.250055	0.198033	0.142759	-0.13066	-0.28475
3.23333	-0.15198	1.17344	0.236721	0.243033	0.173093	-0.11066	-0.44475
3.25	-0.15298	1.23344	0.290055	0.328033	0.208315	-0.13732	-0.66475
3.26667	-0.15265	1.17011	0.296721	0.433033	0.245315	-0.16732	-0.82142
3.28333	-0.15076	1.05678	0.316721	0.518033	0.284759	-0.22066	-1.01809
3.3	-0.15343	1.00011	0.366721	0.568033	0.325204	-0.32399	-1.13809
3.31667	-0.15887	1.04678	0.413388	0.628033	0.364648	-0.41732	-1.25809
3.33333	-0.1662	1.08678	0.456721	0.803033	0.402315	-0.45066	-1.30475
3.35	-0.17243	1.10678	0.496721	0.963033	0.444759	-0.47399	-1.32809
3.36667	-0.17643	1.04344	0.530055	1.03303	0.489093	-0.47732	-1.28809
3.38333	-0.18309	0.843443	0.556721	1.03803	0.532759	-0.51066	-1.29475
3.4	-0.19087	0.913443	0.550055	1.03803	0.576537	-0.47399	-1.34142
3.41667	-0.19776	1.04011	0.543388	1.01803	0.619426	-0.45732	-1.31142
3.43333	-0.2022	1.05011	0.523388	0.918033	0.66087	-0.41399	-1.27142
3.45	-0.20687	1.00344	0.473388	0.828033	0.697426	-0.36732	-1.27142
3.46667	-0.21176	1.08678	0.410055	0.813033	0.732426	-0.34399	-1.23142
3.48333	-0.2182	1.23011	0.383388	0.773033	0.764093	-0.31732	-1.21475
3.5	-0.22543	1.32678	0.380055	0.873033	0.789093	-0.25399	-1.18475
3.51667	-0.23109	1.43011	0.360055	0.878033	0.806315	-0.16066	-1.15809
3.53333	-0.23154	1.54344	0.373388	0.848033	0.819426	-0.14732	-1.02475
3.55	-0.22954	1.66011	0.483388	0.828033	0.828093	-0.13399	-0.92809
3.56667	-0.22632	1.64344	0.560055	0.758033	0.833204	-0.14066	-0.85475
3.58333	-0.22143	1.58011	0.556721	0.718033	0.833981	-0.17399	-0.81809
3.6	-0.21532	1.55011	0.500055	0.623033	0.831093	-0.09066	-0.80809
3.61667	-0.2082	1.57344	0.440055	0.563033	0.827315	-0.10066	-0.79809
3.63333	-0.20165	1.64678	0.413388	0.508033	0.821759	-0.10732	-0.73475
3.65	-0.1942	1.70011	0.350055	0.468033	0.816093	-0.09732	-0.74475
3.66667	-0.18487	1.69678	0.273388	0.433033	0.80687	-0.13732	-0.69475
3.68333	-0.17343	1.68678	0.276721	0.423033	0.794204	-0.22732	-0.68142
3.7	-0.1602	1.65678	0.336721	0.493033	0.777204	-0.23732	-0.70475
3.71667	-0.14409	1.49344	0.350055	0.538033	0.758759	-0.20066	-0.74809
3.73333	-0.12354	1.37344	0.350055	0.538033	0.745204	-0.23066	-0.77809
3.75	-0.10065	1.28344	0.393388	0.593033	0.739537	-0.29399	-0.87142
3.76667	-0.07487	1.13011	0.426721	0.713033	0.735093	-0.27399	-0.94142
3.78333	-0.04731	0.990109	0.446721	0.618033	0.729204	-0.26066	-0.98809
3.8	-0.01731	0.943443	0.470055	0.518033	0.725981	-0.33399	-1.12809
3.81667	0.013685	0.873443	0.496721	0.503033	0.725981	-0.46066	-1.31142
3.83333	0.047574	0.833443	0.503388	0.473033	0.726648	-0.50066	-1.32475
3.85	0.083685	0.933443	0.500055	0.523033	0.722981	-0.55399	-1.32142
3.86667	0.119685	1.00678	0.513388	0.673033	0.716648	-0.50066	-1.46142
3.88333	0.156241	0.983443	0.473388	0.718033	0.709204	-0.47732	-1.55809
3.9	0.193463	0.980109	0.416721	0.738033	0.702093	-0.47732	-1.66809
3.91667	0.230907	0.966776	0.393388	0.768033	0.695204	-0.42066	-1.82809
3.93333	0.267907	1.00344	0.346721	0.628033	0.684204	-0.33399	-1.80809
3.95	0.304241	1.07011	0.316721	0.468033	0.669315	-0.22732	-1.72475
3.96667	0.341352	1.11344	0.393388	0.373033	0.654093	-0.23732	-1.70809
3.98333	0.378907	1.05678	0.400055	0.273033	0.63987	-0.23732	-1.63142
4	0.416241	1.08344	0.296721	0.203033	0.627315	-0.19066	-1.70809
4.01667	0.450685	1.07678	0.253388	0.138033	0.618426	-0.20732	-1.74809
4.03333	0.479352	1.07344	0.320055	0.203033	0.611204	-0.28732	-1.71475
4.05	0.507463	1.06678	0.366721	0.283033	0.601759	-0.27732	-1.68475
4.06667	0.535907	0.900109	0.350055	0.323033	0.585981	-0.22399	-1.67809
4.08333	0.564574	0.830109	0.443388	0.173033	0.565426	-0.20732	-1.63142
4.1	0.592463	0.870109	0.513388	0.228033	0.541537	-0.21066	-1.62142
4.11667	0.61713	0.903443	0.413388	0.233033	0.513093	-0.24732	-1.73475
4.13333	0.639796	0.906776	0.406721	0.063033	0.482093	-0.24066	-1.75475
4.15	0.659796	0.906776	0.380055	0.048033	0.445648	-0.19066	-1.77142
4.16667	0.67913	0.973443	0.296721	0.013033	0.410315	-0.15066	-1.86809
4.18333	0.694463	0.980109	0.260055	0.063033	0.376537	-0.14399	-2.02475
4.2	0.706685	0.956776	0.253388	0.133033	0.344315	-0.18399	-2.05475
4.21667	0.717907	0.926776	0.230055	0.153033	0.309204	-0.19732	-2.02475
4.23333	0.727796	0.886776	0.203388	0.048033	0.264648	-0.21732	-2.09142
4.25	0.736796	0.873443	0.183388	0.023033	0.211648	-0.25399	-2.10142
4.26667	0.741907	0.890109	0.200055	0.048033	0.159981	-0.31399	-2.08475
4.28333	0.74213	0.870109	0.223388	-0.08697	0.10887	-0.36399	-2.10809
4.3	0.736463	0.850109	0.243388	-0.19197	0.05287	-0.37399	-2.12809
4.31667	0.728352	0.890109	0.266721	-0.22697	-0.00869	-0.33732	-2.06475
4.33333	0.713796	0.943443	0.300055	-0.22197	-0.06924	-0.30399	-2.05475
4.35	0.692796	0.956776	0.286721	-0.18697	-0.12669	-0.26066	-2.11809
4.36667	0.670685	0.903443	0.236721	-0.08197	-0.18069	-0.26399	-2.13475
4.38333	0.650352	0.850109	0.266721	0.033033	-0.23135	-0.20732	-2.06475
4.4	0.629796	0.820109	0.320055	0.078033	-0.27824	-0.15066	-1.86809
4.41667	0.609574	0.896776	0.400055	0.048033	-0.31913	-0.17732	-1.72142
4.43333	0.587352	0.986776	0.523388	0.028033	-0.35135	-0.08399	-1.59475
4.45	0.565574	1.02344	0.590055	0.033033	-0.37546	0.092678	-1.57142
4.46667	0.541574	0.950109	0.533388	0.053033	-0.39613	0.116011	-1.57475
4.48333	0.514685	0.810109	0.463388	0.068033	-0.41635	0.102678	-1.61475
4.5	0.485019	0.786776	0.760055	-0.00697	-0.43557	0.086011	-1.79142
4.51667	0.456241	0.776776	0.933388	0.083033	-0.45513	0.069344	-1.78142
4.53333	0.432796	0.763443	0.880055	0.298033	-0.4728	0.082678	-1.66809
4.55	0.407352	0.760109	0.790055	0.433033	-0.48702	0.049344	-1.55142
4.56667	0.375907	0.700109	0.943388	0.473033	-0.49524	-0.01399	-1.42142
4.58333	0.340352	0.680109	1.04672	0.468033	-0.49869	-0.08732	-1.34475
4.6	0.302241	0.696776	1.04672	0.388033	-0.49957	-0.17399	-1.25809
4.61667	0.264796	0.723443	1.06672	0.273033	-0.49713	-0.19732	-1.23142
4.63333	0.232352	0.703443	1.05005	0.148033	-0.49069	-0.19399	-1.21809
4.65	0.200796	0.550109	0.996721	0.053033	-0.47824	-0.24399	-1.17809
4.66667	0.170463	0.490109	0.973388	0.048033	-0.46224	-0.29066	-1.09809
4.68333	0.144574	0.506776	1.01005	0.093033	-0.44313	-0.32732	-1.00809
4.7	0.120352	0.563443	1.03339	0.028033	-0.42202	-0.31066	-0.94142
4.71667	0.095685	0.613443	1.04672	-0.25197	-0.39824	-0.28732	-0.91809
4.73333	0.070241	0.633443	0.943388	-0.37197	-0.37257	-0.34066	-0.88809
4.75	0.042574	0.650109	0.846721	-0.46197	-0.34802	-0.41732	-0.86809
4.76667	0.016574	0.616776	0.823388	-0.49697	-0.32746	-0.55066	-0.87809
4.78333	-0.00587	0.593443	0.783388	-0.51197	-0.30735	-0.65066	-0.86142
4.8	-0.02365	0.553443	0.773388	-0.55697	-0.28591	-0.68066	-0.84142
4.81667	-0.03909	0.490109	0.763388	-0.54697	-0.26024	-0.72399	-0.78809
4.83333	-0.04931	0.533443	0.723388	-0.46697	-0.2358	-0.86399	-0.73809
4.85	-0.05287	0.566776	0.666721	-0.32197	-0.21557	-0.91066	-0.69809
4.86667	-0.05487	0.526776	0.633388	-0.22197	-0.19702	-0.94066	-0.65809
4.88333	-0.0592	0.480109	0.660055	-0.14197	-0.17913	-0.96399	-0.64475
4.9	-0.06031	0.460109	0.663388	-0.07197	-0.16169	-0.86066	-0.59809
4.91667	-0.05843	0.433443	0.513388	-0.03197	-0.14602	-0.72732	-0.49809
4.93333	-0.05576	0.436776	0.406721	-0.01197	-0.1328	-0.65399	-0.45142
4.95	-0.0562	0.463443	0.336721	-0.01697	-0.12324	-0.61399	-0.43142
4.96667	-0.05609	0.490109	0.303388	-0.00697	-0.11957	-0.56066	-0.44142
4.98333	-0.05331	0.436776	0.306721	0.048033	-0.11702	-0.53399	-0.43142
5	-0.0482	0.446776	0.310055	0.043033	-0.1178	-0.52066	-0.40142
5.01667	-0.04276	0.433443	0.310055	0.093033	-0.1208	-0.52732	-0.39809
5.03333	-0.04265	0.443443	0.320055	0.198033	-0.12657	-0.52732	-0.44142
5.05	-0.04309	0.450109	0.333388	0.343033	-0.13146	-0.48066	-0.43142
5.06667	-0.0402	0.446776	0.356721	0.398033	-0.13246	-0.48066	-0.34142
5.08333	-0.03554	0.453443	0.326721	0.413033	-0.13057	-0.49066	-0.34475
5.1	-0.0292	0.450109	0.253388	0.323033	-0.12546	-0.45066	-0.37142
5.11667	-0.02331	0.460109	0.140055	0.113033	-0.11657	-0.42732	-0.45809
5.13333	-0.0202	0.493443	0.013388	0.013033	-0.10869	-0.43066	-0.49809
5.15	-0.01587	0.556776	-0.08661	0.183033	-0.10391	-0.43399	-0.55142
5.16667	-0.01343	0.590109	-0.04995	0.248033	-0.10091	-0.53732	-0.58142
5.18333	-0.01365	0.586776	0.140055	0.213033	-0.09946	-0.54399	-0.61475
5.2	-0.0162	0.580109	0.193388	0.273033	-0.09535	-0.50732	-0.66142
5.21667	-0.01854	0.583443	0.173388	0.378033	-0.08824	-0.56399	-0.68142
5.23333	-0.01987	0.620109	0.173388	0.393033	-0.07791	-0.58066	-0.70475
5.25	-0.01998	0.653443	0.213388	0.418033	-0.06735	-0.59066	-0.76142
5.26667	-0.02187	0.666776	0.213388	0.443033	-0.05669	-0.59066	-0.83142
5.28333	-0.02509	0.720109	0.103388	0.423033	-0.04335	-0.66066	-0.92142
5.3	-0.0292	0.830109	0.123388	0.358033	-0.02413	-0.71399	-0.98142
5.31667	-0.03454	0.920109	0.166721	0.288033	-0.00491	-0.71399	-1.03809
5.33333	-0.0412	0.953443	0.273388	0.228033	0.016093	-0.74066	-1.04475
5.35	-0.05087	0.990109	0.423388	0.263033	0.039759	-0.77066	-1.00475
5.36667	-0.06043	0.980109	0.540055	0.378033	0.065093	-0.75732	-1.01475
5.38333	-0.0672	1.00344	0.506721	0.588033	0.092648	-0.74399	-1.03475
5.4	-0.07409	1.03678	0.296721	0.758033	0.118093	-0.73066	-1.04142
5.41667	-0.08076	1.03011	0.276721	0.808033	0.139204	-0.71399	-1.09142
5.43333	-0.08309	1.03011	0.436721	0.828033	0.157537	-0.73399	-1.11809
5.45	-0.07998	1.02344	0.583388	0.868033	0.17387	-0.76066	-1.12142
5.46667	-0.07565	1.06011	0.623388	0.908033	0.190426	-0.69066	-1.13475
5.48333	-0.07143	0.853443	0.500055	0.863033	0.20487	-0.46066	-1.17142
5.5	-0.06565	0.830109	0.380055	0.868033	0.216759	-0.43066	-1.17475
5.51667	-0.0582	0.873443	0.490055	0.793033	0.228648	-0.43732	-1.10142
5.53333	-0.04798	0.933443	0.556721	0.818033	0.240537	-0.38399	-1.09475
5.55	-0.0362	0.970109	0.543388	0.888033	0.252537	-0.32399	-1.10809
5.56667	-0.0222	1.02011	0.546721	0.943033	0.261981	-0.27732	-1.10809
5.58333	-0.00643	1.07678	0.536721	0.873033	0.27087	-0.26399	-1.07475
5.6	0.00813	1.11344	0.553388	0.833033	0.278315	-0.24399	-1.00475
5.61667	0.022463	1.17011	0.556721	0.778033	0.282648	-0.21066	-0.99142
5.63333	0.036796	1.20678	0.583388	0.738033	0.288315	-0.24399	-0.98809
5.65	0.051463	1.22011	0.603388	0.723033	0.295537	-0.22399	-1.00809
5.66667	0.065574	1.24344	0.633388	0.593033	0.301315	-0.10066	-1.02809
5.68333	0.079685	1.26344	0.660055	0.388033	0.30687	-0.03732	-1.04475
5.7	0.096241	1.28011	0.673388	0.208033	0.311648	-0.01399	-1.04475
5.71667	0.113241	1.28678	0.660055	0.173033	0.315204	0.009344	-1.05142
5.73333	0.130574	1.32011	0.656721	0.183033	0.315981	0.022678	-1.11142
5.75	0.149463	1.29678	0.646721	0.048033	0.315093	0.072678	-1.10809
5.76667	0.168574	1.24344	0.576721	-0.23697	0.313426	0.072678	-1.10475
5.78333	0.187574	1.21011	0.543388	-0.37197	0.309426	0.019344	-1.10475
5.8	0.207352	1.17344	0.526721	-0.37197	0.300426	0.006011	-1.09809
5.81667	0.228796	1.16011	0.503388	-0.14197	0.289648	0.009344	-1.08809
5.83333	0.25113	1.20678	0.490055	0.133033	0.276981	0.062678	-1.07809
5.85	0.272463	1.22011	0.460055	0.313033	0.263648	0.192678	-1.05809
5.86667	0.291574	1.18678	0.470055	0.278033	0.251426	0.212678	-1.03142
5.88333	0.307796	1.17011	0.463388	0.293033	0.238537	0.169344	-1.01809
5.9	0.321019	1.15678	0.366721	0.393033	0.226426	0.209344	-1.01809
5.91667	0.330463	1.13678	0.306721	0.348033	0.216759	0.219344	-1.02809
5.93333	0.337463	1.11011	0.273388	0.308033	0.20887	0.216011	-1.03142
5.95	0.343463	1.09678	0.326721	0.278033	0.201204	0.266011	-1.05142
5.96667	0.347241	1.06678	0.490055	0.278033	0.194204	0.356011	-1.03809
5.98333	0.349574	1.04678	0.466721	0.353033	0.187204	0.382678	-0.98142
6	0.352241	1.04344	0.346721	0.288033	0.181981	0.346011	-0.91142
6.01667	0.35313	1.04678	0.393388	0.243033	0.175981	0.296011	-0.88142
6.03333	0.35113	1.03678	0.460055	0.228033	0.169981	0.242678	-0.84809
6.05	0.347463	1.02344	0.513388	0.228033	0.164537	0.186011	-0.72809
6.06667	0.341685	1.02344	0.553388	0.213033	0.158204	0.149344	-0.69809
6.08333	0.331685	1.00678	0.560055	0.198033	0.149537	0.069344	-0.77475
6.1	0.320796	1.00344	0.596721	0.248033	0.140315	0.046011	-0.82475
6.11667	0.307463	0.996776	0.656721	0.238033	0.132315	0.052678	-0.87142
6.13333	0.294241	1.02011	0.693388	0.288033	0.125426	0.069344	-0.86809
6.15	0.28213	1.08678	0.690055	0.343033	0.122759	0.069344	-0.83142
6.16667	0.270907	1.09344	0.663388	0.328033	0.123759	0.089344	-0.79142
6.18333	0.260574	1.04678	0.656721	0.243033	0.125648	0.149344	-0.76475
6.2	0.248352	1.04344	0.626721	0.123033	0.12487	0.179344	-0.80142
6.21667	0.23513	1.03344	0.603388	0.023033	0.122426	0.249344	-0.79475
6.23333	0.222463	0.976776	0.626721	-0.05197	0.119204	0.296011	-0.77475
6.25	0.207907	0.956776	0.630055	-0.07697	0.116648	0.302678	-0.92475
6.26667	0.18913	0.946776	0.620055	-0.06197	0.115426	0.286011	-1.09475
6.28333	0.16713	0.973443	0.596721	-0.09197	0.114537	0.306011	-1.18475
6.3	0.143796	0.956776	0.623388	-0.11697	0.114426	0.326011	-1.19142
6.31667	0.119352	0.910109	0.646721	-0.12697	0.11387	0.312678	-1.19475
6.33333	0.094019	0.866776	0.570055	-0.11197	0.112537	0.289344	-1.15475
6.35	0.07013	0.810109	0.546721	-0.03197	0.10787	0.216011	-1.08809
6.36667	0.046352	0.776776	0.520055	0.053033	0.100204	0.152678	-1.05809
6.38333	0.021463	0.750109	0.460055	0.073033	0.090982	0.139344	-1.01142
6.4	-0.00309	0.793443	0.453388	0.103033	0.082204	0.142678	-1.00475
6.41667	-0.0252	0.820109	0.456721	0.213033	0.073093	0.112678	-1.01142
6.43333	-0.04476	0.853443	0.466721	0.313033	0.071982	0.096011	-1.01142
6.45	-0.06187	0.863443	0.483388	0.373033	0.077759	0.086011	-0.98809
6.46667	-0.0752	0.850109	0.483388	0.378033	0.086426	0.062678	-0.96475
6.48333	-0.08676	0.830109	0.476721	0.293033	0.100204	0.066011	-0.96809
6.5	-0.09743	0.816776	0.483388	0.288033	0.119093	0.082678	-1.00475
6.51667	-0.10332	0.806776	0.486721	0.283033	0.139981	0.136011	-1.02475
6.53333	-0.1082	0.796776	0.620055	0.243033	0.161759	0.179344	-0.97475
6.55	-0.11743	0.766776	0.663388	0.148033	0.18287	0.172678	-0.90142
6.56667	-0.12909	0.773443	0.650055	0.053033	0.205981	0.176011	-0.88475
6.58333	-0.13743	0.756776	0.650055	-0.03197	0.233648	0.152678	-0.91475
6.6	-0.1442	0.706776	0.646721	-0.11697	0.261537	0.126011	-0.94142
6.61667	-0.14854	0.676776	0.636721	-0.14697	0.286759	0.096011	-0.91809
6.63333	-0.15343	0.566776	0.683388	-0.19697	0.311204	0.082678	-0.83475
6.65	-0.16009	0.523443	0.730055	-0.27197	0.333537	0.049344	-0.60142
6.66667	-0.16687	0.536776	0.726721	-0.27197	0.353426	0.016011	-0.43142
6.68333	-0.17209	0.523443	0.743388	-0.31697	0.36987	-0.00066	-0.34475
6.7	-0.17187	0.550109	0.773388	-0.41697	0.386981	-0.02399	-0.28809
6.71667	-0.16787	0.580109	0.770055	-0.31697	0.403759	-0.04399	-0.21809
6.73333	-0.16276	0.586776	0.663388	-0.16197	0.421537	-0.00066	-0.14142
6.75	-0.15554	0.673443	0.676721	-0.11697	0.437981	0.072678	-0.19142
6.76667	-0.14232	0.726776	0.683388	-0.16697	0.452315	0.082678	-0.24809
6.78333	-0.1222	0.706776	0.673388	-0.32197	0.465981	0.062678	-0.29475
6.8	-0.10154	0.733443	0.610055	-0.40197	0.47487	0.069344	-0.38809
6.81667	-0.08265	0.733443	0.596721	-0.49697	0.487204	0.092678	-0.45475
6.83333	-0.0642	0.706776	0.616721	-0.53697	0.506093	0.122678	-0.50142
6.85	-0.04609	0.673443	0.540055	-0.33197	0.524537	0.152678	-0.51142
6.86667	-0.02765	0.623443	0.246721	-0.29697	0.540093	0.116011	-0.52809
6.88333	-0.00665	0.613443	0.143388	-0.42697	0.555093	0.079344	-0.52142
6.9	0.012352	0.683443	0.283388	-0.57697	0.569759	0.052678	-0.51475
6.91667	0.030019	0.790109	0.340055	-0.53197	0.584093	0.069344	-0.54142
6.93333	0.045907	0.826776	0.333388	-0.35197	0.589759	0.096011	-0.57475
6.95	0.055685	0.880109	0.226721	-0.27697	0.589315	0.129344	-0.63142
6.96667	0.060019	0.963443	0.040055	-0.10697	0.587759	0.186011	-0.67142
6.98333	0.062574	1.04011	0.050055	0.063033	0.584204	0.169344	-0.65142
7	0.062685	1.01011	0.083388	-0.00197	0.572315	0.076011	-0.63475
7.01667	0.057463	1.01678	0.123388	-0.05697	0.549426	0.002678	-0.57475
7.03333	0.05513	1.06344	0.073388	-0.15197	0.520648	-0.14732	-0.61809
7.05	0.06313	1.04344	0.043388	-0.29697	0.486648	-0.33399	-0.64142
7.06667	0.076463	1.09678	0.053388	-0.39697	0.447648	-0.36399	-0.53809
7.08333	0.086574	1.11678	0.023388	-0.33197	0.404204	-0.34066	-0.52142
7.1	0.095796	1.18344	-0.01995	-0.13197	0.359093	-0.28732	-0.47809
7.11667	0.105241	1.32678	0.006721	0.108033	0.310648	-0.19399	-0.50475
7.13333	0.114241	1.41011	0.066721	0.253033	0.259759	-0.16066	-0.49475
7.15	0.12613	1.49011	0.116721	0.293033	0.205759	-0.20732	-0.37809
7.16667	0.138796	1.52678	0.186721	0.273033	0.152315	-0.25066	-0.22142
7.18333	0.148796	1.52011	0.246721	0.248033	0.110426	-0.27732	-0.20475
7.2	0.154463	1.55344	0.230055	0.258033	0.071426	-0.31732	-0.27142
7.21667	0.159685	1.59678	0.186721	0.268033	0.031315	-0.29732	-0.22809
7.23333	0.163796	1.63011	0.043388	0.438033	-0.00824	-0.23399	-0.15142
7.25	0.167241	1.64678	-0.01328	0.433033	-0.04357	-0.17399	-0.15809
7.26667	0.172685	1.70678	0.023388	0.393033	-0.07602	-0.16399	-0.12475
7.28333	0.17713	1.80011	0.030055	0.528033	-0.1068	-0.21399	-0.09142
7.3	0.183241	1.82344	-0.06661	0.638033	-0.13135	-0.26399	-0.14142
7.31667	0.192907	1.83344	-0.04995	0.678033	-0.15346	-0.09732	-0.25475
7.33333	0.203352	1.84344	0.110055	0.778033	-0.18257	-0.06066	-0.25809
7.35	0.214796	1.88344	0.216721	0.878033	-0.21024	-0.16399	-0.30142
7.36667	0.228241	1.92011	0.193388	0.893033	-0.23935	-0.19732	-0.41475
7.38333	0.24113	1.92011	0.043388	0.843033	-0.26969	-0.14732	-0.46475
7.4	0.257241	1.96678	0.136721	0.813033	-0.30202	-0.08732	-0.50809
7.41667	0.275019	1.99344	0.326721	0.893033	-0.33635	-0.18732	-0.52475
7.43333	0.294463	2.02011	0.563388	0.938033	-0.37146	-0.24066	-0.48809
7.45	0.319019	1.98344	0.890055	0.973033	-0.40713	-0.20399	-0.47809
7.46667	0.347796	1.97011	1.13006	0.968033	-0.44291	-0.25399	-0.47809
7.48333	0.376352	1.86344	1.21672	0.888033	-0.47635	-0.24732	-0.52142
7.5	0.404907	1.80678	1.23339	0.768033	-0.50113	-0.26066	-0.61809
7.51667	0.438463	1.80344	1.18006	0.678033	-0.51391	-0.23399	-0.76475
7.53333	0.472019	1.76344	1.16339	0.643033	-0.52057	-0.18732	-0.73142
7.55	0.50213	1.73011	1.10339	0.653033	-0.52302	-0.13066	-0.68142
7.56667	0.527574	1.64344	1.17006	0.543033	-0.52113	-0.03399	-0.76475
7.58333	0.554019	1.57011	1.28339	0.403033	-0.51791	0.102678	-0.91809
7.6	0.581019	1.36344	1.02005	0.298033	-0.51291	0.172678	-1.12475
7.61667	0.608352	1.03011	0.756721	0.273033	-0.50569	0.192678	-1.22809
7.63333	0.637796	0.930109	0.746721	0.278033	-0.49969	0.136011	-1.23475
7.65	0.664574	0.853443	0.810055	-0.01697	-0.49091	-0.03732	-1.20809
7.66667	0.689907	0.793443	0.990055	-0.43197	-0.47791	-0.06066	-1.18475
7.68333	0.715019	0.743443	0.983388	-0.45697	-0.47191	-0.05732	-1.13809
7.7	0.738907	0.706776	0.930055	-0.33197	-0.46869	-0.07732	-1.05142
7.71667	0.758463	0.643443	0.876721	-0.30697	-0.4628	-0.11066	-1.04142
7.73333	0.776796	0.590109	0.836721	-0.40197	-0.45702	-0.07732	-1.03809
7.75	0.793685	0.580109	0.770055	-0.33697	-0.45291	-0.07399	-1.02475
7.76667	0.806685	0.553443	0.710055	-0.12197	-0.44924	-0.07399	-0.99142
7.78333	0.816241	0.530109	0.703388	0.048033	-0.44602	-0.03066	-1.06142
7.8	0.824574	0.520109	0.590055	0.243033	-0.44535	-0.02399	-1.06142
7.81667	0.831241	0.480109	0.523388	0.513033	-0.44957	-0.03399	-1.08142
7.83333	0.836019	0.483443	0.510055	0.468033	-0.45013	-0.02399	-1.07142
7.85	0.835907	0.523443	0.550055	0.323033	-0.4468	-0.00066	-1.08142
7.86667	0.831241	0.543443	0.496721	0.148033	-0.43857	-0.05066	-1.13142
7.88333	0.83113	0.560109	0.436721	-0.08697	-0.43013	-0.09066	-1.06475
7.9	0.833685	0.583443	0.450055	-0.02697	-0.42002	-0.12399	-0.98142
7.91667	0.831907	0.630109	0.476721	0.193033	-0.40691	-0.16066	-0.93142
7.93333	0.822463	0.620109	0.376721	0.208033	-0.38713	-0.15732	-0.83809
7.95	0.808241	0.573443	0.360055	0.128033	-0.36246	-0.15399	-0.80142
7.96667	0.791907	0.580109	0.410055	-0.06197	-0.33435	-0.08732	-0.78809
7.98333	0.777463	0.640109	0.470055	-0.36197	-0.30646	0.126011	-0.77142
8	0.761796	0.730109	0.516721	-0.47697	-0.27846	0.192678	-0.78475
8.01667	0.74113	0.790109	0.530055	-0.55197	-0.25069	0.169344	-0.88809
8.03333	0.720463	0.796776	0.543388	-0.72197	-0.22169	0.142678	-0.91475
8.05	0.700241	0.756776	0.563388	-0.91197	-0.18957	0.222678	-0.91142
8.06667	0.681352	0.766776	0.503388	-0.93697	-0.1588	0.346011	-0.88142
8.08333	0.663907	0.816776	0.446721	-0.95197	-0.12946	0.442678	-0.87475
8.1	0.644685	0.833443	0.553388	-0.92697	-0.10046	0.482678	-0.84809
8.11667	0.624352	0.753443	0.683388	-0.73697	-0.06902	0.509344	-0.83809
8.13333	0.603241	0.716776	0.723388	-0.40197	-0.03402	0.636011	-0.84475
8.15	0.582352	0.630109	0.723388	-0.28197	0.00187	0.679344	-0.84475
8.16667	0.560241	0.556776	0.723388	-0.18197	0.036426	0.662678	-0.86809
8.18333	0.537463	0.526776	0.723388	-0.03697	0.07087	0.632678	-0.88142
8.2	0.516241	0.493443	0.743388	0.018033	0.107537	0.622678	-0.98475
8.21667	0.496352	0.450109	0.803388	0.168033	0.144537	0.609344	-1.01142
8.23333	0.477352	0.436776	0.816721	0.423033	0.181981	0.629344	-0.99809
8.25	0.458796	0.623443	0.823388	0.648033	0.218426	0.642678	-1.02142
8.26667	0.43913	0.670109	0.826721	0.733033	0.254537	0.702678	-0.97809
8.28333	0.420796	0.616776	0.823388	0.768033	0.290093	0.776011	-0.86142
8.3	0.40213	0.596776	0.876721	0.803033	0.324426	0.816011	-0.86809
8.31667	0.382352	0.643443	0.906721	0.858033	0.352981	0.809344	-0.91475
8.33333	0.363463	0.666776	0.930055	0.838033	0.375759	0.799344	-0.94142
8.35	0.34713	0.646776	0.960055	0.813033	0.390759	0.776011	-0.89142
8.36667	0.328796	0.603443	0.960055	0.853033	0.406315	0.826011	-0.85809
8.38333	0.30113	0.576776	0.966721	0.838033	0.427315	0.796011	-0.87809
8.4	0.26513	0.530109	0.963388	0.543033	0.450426	0.759344	-1.00809
8.41667	0.230907	0.516776	0.966721	0.363033	0.471093	0.709344	-1.16809
8.43333	0.203241	0.533443	0.970055	0.268033	0.483537	0.602678	-1.05142
8.45	0.179907	0.563443	0.980055	0.238033	0.494537	0.612678	-1.00142
8.46667	0.156241	0.610109	0.963388	0.243033	0.504759	0.639344	-1.04142
8.48333	0.13313	0.530109	0.903388	0.283033	0.51587	0.469344	-1.07475
8.5	0.112241	0.470109	0.900055	0.208033	0.527204	0.432678	-1.05142
8.51667	0.091241	0.396776	0.893388	0.053033	0.539759	0.499344	-0.99475
8.53333	0.067352	0.353443	0.850055	-0.03197	0.551204	0.429344	-1.01142
8.55	0.040019	0.306776	0.803388	-0.03197	0.560315	0.339344	-0.97809
8.56667	0.012019	0.306776	0.723388	0.083033	0.572315	0.356011	-0.75475
8.58333	-0.01254	0.300109	0.610055	0.193033	0.585204	0.366011	-0.71142
8.6	-0.03287	0.306776	0.496721	0.378033	0.598537	0.259344	-0.77809
8.61667	-0.05065	0.320109	0.530055	0.383033	0.609981	0.059344	-0.74475
8.63333	-0.06865	0.306776	0.606721	0.313033	0.612981	-0.07399	-0.71809
8.65	-0.08909	0.333443	0.676721	0.163033	0.608093	-0.12066	-0.83809
8.66667	-0.10898	0.330109	0.726721	0.128033	0.595537	-0.12732	-0.95809
8.68333	-0.12998	0.310109	0.850055	0.158033	0.581981	-0.14399	-0.98809
8.7	-0.15432	0.313443	0.796721	0.143033	0.571093	-0.21732	-1.00475
8.71667	-0.18254	0.303443	0.763388	0.128033	0.562759	-0.16066	-1.08809
8.73333	-0.21109	0.306776	0.696721	0.113033	0.55487	-0.11732	-1.08475
8.75	-0.23632	0.386776	0.516721	0.078033	0.546315	-0.10399	-1.15475
8.76667	-0.25876	0.486776	0.353388	-0.02197	0.540981	-0.13399	-1.19142
8.78333	-0.28387	0.556776	0.286721	-0.17697	0.543093	-0.22066	-1.18475
8.8	-0.30965	0.546776	0.323388	-0.34197	0.548537	-0.12732	-1.08809
8.81667	-0.33332	0.463443	0.340055	-0.40697	0.554759	-0.10066	-0.98809
8.83333	-0.35576	0.633443	0.430055	-0.34697	0.560093	-0.10399	-0.91475
8.85	-0.3762	0.740109	0.440055	-0.29197	0.57087	-0.10732	-0.94142
8.86667	-0.3882	0.800109	0.436721	-0.28697	0.577537	-0.17399	-1.00809
8.88333	-0.39198	0.870109	0.456721	-0.25697	0.575093	-0.24066	-0.99809
8.9	-0.3862	0.916776	0.656721	-0.25197	0.568426	-0.17732	-0.94809
8.91667	-0.37398	0.966776	0.756721	-0.23697	0.566981	0.016011	-0.85475
8.93333	-0.35876	1.04678	0.856721	-0.20197	0.573315	0.049344	-0.80809
8.95	-0.34276	1.09678	1.06672	-0.22697	0.568648	0.066011	-0.77475
8.96667	-0.32432	1.17344	1.10339	-0.31197	0.552537	0.152678	-0.67809
8.98333	-0.30609	1.27344	0.803388	-0.38697	0.529204	0.206011	-0.64809
9	-0.2902	1.30011	0.693388	-0.48697	0.502648	0.096011	-0.71475
9.01667	-0.27376	1.32678	0.740055	-0.70197	0.472315	-0.04066	-0.80142
9.03333	-0.25732	1.45011	0.756721	-0.85697	0.439204	-0.13399	-0.81475
9.05	-0.24043	1.55011	0.866721	-1.03697	0.409537	-0.24732	-0.82475
9.06667	-0.22287	1.61344	1.01339	-0.94197	0.378648	-0.33066	-0.95142
9.08333	-0.20965	1.60344	0.986721	-0.85197	0.346093	-0.32399	-1.16809
9.1	-0.19909	1.55011	0.983388	-0.76697	0.30987	-0.22399	-1.30142
9.11667	-0.19387	1.58011	1.15006	-0.61197	0.275315	-0.10732	-1.37475
9.13333	-0.1882	1.66344	1.14672	-0.39697	0.253759	-0.11399	-1.49142
9.15	-0.17487	1.78344	1.12006	-0.16697	0.238537	-0.18399	-1.55809
9.16667	-0.15954	1.86011	1.07005	-0.48697	0.228426	-0.22732	-1.63809
9.18333	-0.14476	1.84678	1.00672	-0.64697	0.216426	-0.29732	-1.70142
9.2	-0.13154	1.85011	0.853388	-0.45197	0.201759	-0.54732	-1.71809
9.21667	-0.11609	1.90678	0.733388	-0.17697	0.185426	-0.78732	-1.67475
9.23333	-0.09809	1.91678	0.696721	-0.06197	0.171426	-0.87732	-1.62809
9.25	-0.08131	1.87011	0.673388	0.018033	0.161315	-0.96732	-1.54142
9.26667	-0.06798	1.98011	0.666721	0.323033	0.144315	-0.98066	-1.51142
9.28333	-0.05665	2.03011	0.623388	0.638033	0.120093	-0.98399	-1.46809
9.3	-0.04343	2.03344	0.610055	0.748033	0.095426	-1.01066	-1.48475
9.31667	-0.02798	1.94678	0.623388	0.773033	0.075982	-0.97066	-1.41809
9.33333	-0.01276	1.84344	0.660055	0.998033	0.060759	-0.83399	-1.33142
9.35	-0.00043	1.70678	0.733388	0.953033	0.042204	-0.76399	-1.17142
9.36667	0.004019	1.63678	0.760055	0.918033	0.025093	-0.74732	-1.17142
9.38333	0.000907	1.59011	0.850055	0.733033	0.015093	-0.71399	-1.19142
9.4	-0.00765	1.64344	0.880055	0.458033	0.003537	-0.70066	-1.22475
9.41667	-0.02165	1.63011	1.00672	0.113033	-0.0098	-0.64732	-1.20475
9.43333	-0.03565	1.51344	1.11339	-0.10697	-0.02513	-0.75399	-1.16142
9.45	-0.04754	1.44344	1.24005	-0.13697	-0.03246	-0.79399	-1.09475
9.46667	-0.06098	1.45011	1.33339	-0.09197	-0.0268	-0.83066	-1.03809
9.48333	-0.07676	1.54344	1.36672	0.018033	-0.01357	-0.85066	-0.99142
9.5	-0.08787	1.66344	1.12006	0.083033	0.000759	-0.64399	-0.88809
9.51667	-0.09365	1.71344	0.836721	0.058033	0.017204	-0.51399	-0.89809
9.53333	-0.09276	1.66678	0.740055	-0.01197	0.036759	-0.28066	-0.82475
9.55	-0.08565	1.60011	0.643388	0.143033	0.054315	-0.06066	-0.67809
9.56667	-0.07443	1.56344	0.650055	0.113033	0.071982	-0.13399	-0.70809
9.58333	-0.06465	1.50344	0.660055	0.208033	0.092426	-0.17732	-1.07475
9.6	-0.05576	1.46011	0.643388	0.363033	0.117204	-0.06399	-1.15809
9.61667	-0.04631	1.45344	0.690055	0.453033	0.148759	-0.02066	-1.07475
9.63333	-0.04043	1.42011	0.733388	0.548033	0.177204	-0.02732	-0.85475
9.65	-0.04131	1.38678	0.756721	0.593033	0.20387	-0.08066	-0.67142
9.66667	-0.04476	1.29678	0.750055	0.603033	0.226981	-0.12066	-0.56475
9.68333	-0.04931	1.25344	0.706721	0.668033	0.247537	-0.03399	-0.45142
9.7	-0.04998	1.23344	0.643388	0.753033	0.269648	-0.00732	-0.39142
9.71667	-0.04843	1.21344	0.503388	0.903033	0.291093	-0.07732	-0.37475
9.73333	-0.0492	1.31344	0.400055	0.903033	0.307426	-0.14399	-0.38809
9.75	-0.05065	1.43344	0.463388	0.928033	0.318204	-0.17732	-0.39809
9.76667	-0.05065	1.41011	0.576721	1.13803	0.330204	-0.27732	-0.37809
9.78333	-0.04865	1.32678	0.553388	1.23303	0.336426	-0.39066	-0.39475
9.8	-0.0492	1.35678	0.593388	1.20803	0.332315	-0.46732	-0.37809
9.81667	-0.05298	1.42011	0.640055	1.01303	0.326759	-0.53399	-0.40809
9.83333	-0.05698	1.42344	0.610055	0.623033	0.32287	-0.56399	-0.73809
9.85	-0.0582	1.40678	0.660055	0.213033	0.325204	-0.58732	-0.91809
9.86667	-0.05554	1.30678	0.680055	-0.07197	0.331426	-0.53732	-1.07475
9.88333	-0.04898	1.16344	0.686721	-0.30197	0.336093	-0.34399	-1.31142
9.9	-0.04076	1.01678	0.636721	-0.57197	0.34587	-0.28399	-1.63475
9.91667	-0.03054	0.960109	0.763388	-0.74197	0.355759	-0.28732	-1.82475
9.93333	-0.02443	0.796776	0.933388	-0.76697	0.358093	-0.06399	-2.07142
9.95	-0.02687	0.693443	1.08339	-0.83197	0.358537	0.016011	-2.20142
9.96667	-0.03431	0.576776	1.19006	-0.89197	0.355315	0.066011	-2.24809
9.98333	-0.04409	0.540109	1.21672	-0.93197	0.350315	0.056011	-2.23475
10	-0.05798	0.516776	1.05005	-0.72197	0.346426	-0.03399	-2.17142
10.0167	-0.07809	0.473443	0.643388	-0.66197	0.34187	-0.03732	-2.09809
10.0333	-0.10776	0.390109	0.400055	-0.60697	0.338204	-0.13399	-1.91809
10.05	-0.14632	0.353443	0.330055	-0.54197	0.335648	-0.22066	-1.82809
10.0667	-0.1872	0.313443	0.253388	-0.33697	0.334981	-0.24732	-1.68142
10.0833	-0.22332	0.230109	0.236721	0.098033	0.334981	-0.22066	-1.45142
10.1	-0.2562	0.200109	0.283388	0.498033	0.336981	-0.24066	-1.26142
10.1167	-0.28465	0.210109	0.360055	0.903033	0.333759	-0.31399	-1.10475
10.1333	-0.30709	0.246776	0.346721	1.11303	0.330315	-0.33066	-1.03142
10.15	-0.32676	0.313443	0.290055	1.38803	0.328204	-0.43732	-0.99809
10.1667	-0.34598	0.330109	0.383388	1.70303	0.325426	-0.50066	-0.87475
10.1833	-0.36087	0.363443	0.670055	1.84303	0.320204	-0.48732	-0.81142
10.2	-0.37209	0.396776	0.820055	1.90303	0.308537	-0.43732	-0.85142
10.2167	-0.38087	0.386776	0.943388	1.93303	0.292315	-0.41066	-1.09475
10.2333	-0.38032	0.426776	1.01339	1.96803	0.277537	-0.42399	-1.21809
10.25	-0.37309	0.473443	0.993388	1.99803	0.265648	-0.40066	-1.32809
10.2667	-0.3592	0.470109	0.856721	1.86803	0.251426	-0.36066	-1.43142
10.2833	-0.33954	0.493443	0.836721	1.43303	0.242093	-0.28066	-1.61475
10.3	-0.31665	0.463443	0.926721	1.05803	0.24287	-0.22732	-1.54142
10.3167	-0.29343	0.460109	1.05005	0.888033	0.245093	-0.20399	-1.42809
10.3333	-0.26843	0.476776	1.09339	0.688033	0.248426	-0.20066	-1.39142
10.35	-0.23943	0.420109	1.00005	0.533033	0.248093	-0.23399	-1.39142
10.3667	-0.21098	0.393443	0.783388	0.483033	0.24087	-0.29066	-1.30142
10.3833	-0.18332	0.410109	0.576721	0.463033	0.232426	-0.29732	-1.22475
10.4	-0.15287	0.473443	0.616721	0.348033	0.222759	-0.16399	-1.17475
10.4167	-0.12109	0.486776	0.566721	0.293033	0.213537	-0.14732	-1.15475
10.4333	-0.08643	0.453443	0.493388	0.333033	0.210093	-0.12732	-1.14475
10.45	-0.0432	0.370109	0.470055	0.303033	0.210648	0.052678	-1.14475
10.4667	0.006685	0.426776	0.523388	0.328033	0.211204	0.209344	-1.20475
10.4833	0.059352	0.530109	0.673388	0.293033	0.208204	0.159344	-1.22475
10.5	0.112463	0.656776	0.740055	-0.09197	0.200093	0.069344	-1.25809
10.5167	0.166796	0.686776	0.683388	-0.32197	0.185981	-0.06399	-1.27142
10.5333	0.226574	0.770109	0.593388	-0.52197	0.164759	-0.11399	-1.31809
10.55	0.296907	0.870109	0.586721	-0.61697	0.139093	-0.04399	-1.40809
10.5667	0.369352	0.926776	0.560055	-0.84197	0.10787	0.012678	-1.63475
10.5833	0.439019	0.906776	0.533388	-0.83197	0.072759	0.126011	-1.79809
10.6	0.504574	0.983443	0.600055	-0.77197	0.039537	0.079344	-1.77142
10.6167	0.566907	1.07678	0.613388	-0.76197	0.006426	-0.07399	-1.72809
10.6333	0.619241	1.19678	0.646721	-0.81197	-0.03135	-0.14399	-1.73809
10.65	0.664241	1.28678	0.580055	-0.68697	-0.07191	-0.03732	-1.68475
10.6667	0.711241	1.33678	0.403388	-0.54697	-0.1098	-0.04066	-1.57475
10.6833	0.759019	1.33678	0.266721	-0.40197	-0.14335	-0.11399	-1.53809
10.7	0.802241	1.24344	0.230055	-0.38697	-0.1758	-0.14066	-1.55475
10.7167	0.847241	1.12678	0.270055	-0.23197	-0.20391	-0.20066	-1.49142
10.7333	0.884019	1.10678	0.456721	0.013033	-0.23191	-0.18732	-1.17809
10.75	0.908352	1.10678	0.380055	0.058033	-0.25935	-0.13732	-0.88809
10.7667	0.925796	1.09344	0.196721	0.028033	-0.28102	-0.17066	-0.89475
10.7833	0.941574	1.12678	0.186721	0.088033	-0.30035	-0.21066	-1.00475
10.8	0.957574	1.17678	0.166721	0.058033	-0.3208	-0.14732	-1.08475
10.8167	0.972241	1.23011	0.296721	-0.01697	-0.34002	-0.18066	-1.15809
10.8333	0.984685	1.21678	0.486721	-0.06197	-0.36046	-0.22066	-1.23142
10.85	0.994352	1.19011	0.566721	-0.11197	-0.38046	-0.15399	-1.26475
10.8667	1.00691	1.25678	0.596721	-0.15697	-0.39502	-0.01732	-1.24142
10.8833	1.02157	1.30011	0.416721	-0.42697	-0.40869	0.029344	-1.17809
10.9	1.0278	1.35011	0.256721	-0.58697	-0.42257	0.002678	-1.14142
10.9167	1.02913	1.34344	0.283388	-0.56197	-0.43669	-0.07732	-1.17142
10.9333	1.02691	1.26678	0.403388	-0.46697	-0.45157	-0.19732	-1.13142
10.95	1.01835	1.25344	0.443388	-0.31197	-0.46935	-0.31066	-1.07475
10.9667	1.00802	1.28344	0.570055	-0.25697	-0.48857	-0.31732	-1.00142
10.9833	1.00024	1.31344	0.746721	-0.32697	-0.50424	-0.21066	-0.91475
11	0.993796	1.37344	0.786721	-0.31697	-0.51091	-0.21066	-0.86142
11.0167	0.989574	1.48344	0.700055	-0.24697	-0.50424	-0.29066	-0.79809
11.0333	0.987796	1.58344	0.570055	-0.07197	-0.49202	-0.29732	-0.75142
11.05	0.983352	1.68011	0.590055	0.158033	-0.47835	-0.13066	-0.74475
11.0667	0.974352	1.73011	0.673388	0.478033	-0.45946	0.049344	-0.80809
11.0833	0.960241	1.74011	0.886721	0.868033	-0.43602	0.069344	-1.03142
11.1	0.945463	1.81011	0.793388	0.883033	-0.41446	-0.07399	-1.17142
11.1167	0.930463	1.87011	0.686721	0.843033	-0.39569	-0.00732	-1.22809
11.1333	0.920463	1.94344	0.773388	0.933033	-0.37769	0.026011	-1.32142
11.15	0.918685	1.89344	0.856721	0.963033	-0.3588	0.166011	-1.70142
11.1667	0.916685	1.80678	0.920055	0.928033	-0.34069	0.302678	-1.77475
11.1833	0.910907	1.69678	0.923388	0.948033	-0.32369	0.222678	-1.59809
11.2	0.90113	1.62678	0.953388	0.778033	-0.30991	0.209344	-1.59475
11.2167	0.885241	1.71344	0.880055	0.603033	-0.2948	0.066011	-1.59809
11.2333	0.870796	1.73678	0.716721	0.393033	-0.2748	0.062678	-1.56809
11.25	0.863352	1.78011	0.710055	0.173033	-0.2538	-0.03066	-1.45809
11.2667	0.861019	1.75678	0.730055	0.203033	-0.2358	-0.12066	-1.34142
11.2833	0.856796	1.75678	0.610055	0.133033	-0.22235	-0.16399	-1.25809
11.3	0.84813	1.71678	0.530055	-0.01197	-0.2088	-0.26732	-1.24475
11.3167	0.838352	1.65344	0.520055	-0.14697	-0.19813	-0.37066	-1.16475
11.3333	0.828685	1.67344	0.486721	-0.24197	-0.19313	-0.40732	-1.01142
11.35	0.820574	1.72344	0.403388	-0.28697	-0.19124	-0.37399	-0.93809
11.3667	0.816352	1.74344	0.346721	-0.27197	-0.19135	-0.29066	-0.92475
11.3833	0.811241	1.74678	0.326721	-0.29697	-0.19324	-0.27399	-0.87142
11.4	0.80913	1.76011	0.240055	-0.35197	-0.1948	-0.34066	-0.72809
11.4167	0.809241	1.85678	0.110055	-0.43697	-0.19857	-0.42066	-0.59142
11.4333	0.813241	1.95344	0.283388	-0.51197	-0.20124	-0.42732	-0.32475
11.45	0.824352	1.99011	0.513388	-0.60697	-0.20057	-0.36732	-0.04475
11.4667	0.837019	1.94678	0.606721	-0.81697	-0.19913	-0.33399	0.048579
11.4833	0.848463	1.91344	0.626721	-0.92197	-0.20013	-0.37066	0.061913
11.5	0.864019	1.78344	0.516721	-1.03697	-0.1998	-0.38066	0.031913
11.5167	0.882241	1.66011	0.376721	-1.00697	-0.20157	-0.39399	0.008579
11.5333	0.893796	1.64678	0.123388	-0.96197	-0.19746	-0.39066	-0.24475
11.55	0.898241	1.64344	0.086721	-1.00697	-0.18902	-0.31066	-0.69475
11.5667	0.904241	1.56344	0.130055	-0.91697	-0.18024	-0.24066	-0.82475
11.5833	0.916685	1.57678	0.156721	-0.69697	-0.16902	-0.20732	-0.97809
11.6	0.932019	1.61678	0.220055	-0.69697	-0.15557	-0.19732	-1.27809
11.6167	0.94813	1.57011	0.280055	-0.65697	-0.14091	-0.27399	-1.47809
11.6333	0.964241	1.51344	0.326721	-0.38697	-0.11869	-0.31066	-1.58142
11.65	0.977241	1.49011	0.413388	0.093033	-0.09202	-0.28066	-1.61475
11.6667	0.990574	1.49011	0.493388	0.248033	-0.06424	-0.26732	-1.68809
11.6833	1.00446	1.53678	0.503388	0.148033	-0.0368	-0.31399	-1.78809
11.7	1.02013	1.63678	0.546721	0.198033	-0.00724	-0.30066	-1.83475
11.7167	1.03624	1.67678	0.836721	0.253033	0.01887	-0.26732	-1.79475
11.7333	1.04635	1.66678	0.930055	0.373033	0.039759	-0.32066	-1.67809
11.75	1.04869	1.64678	0.736721	0.463033	0.062315	-0.53399	-1.70475
11.7667	1.0448	1.69678	0.523388	0.393033	0.087648	-0.68732	-1.76142
11.7833	1.04046	1.54011	0.496721	0.283033	0.114759	-0.61732	-1.75142
11.8	1.0388	1.51678	0.420055	0.298033	0.136204	-0.55399	-1.70809
11.8167	1.04002	1.47344	0.283388	0.338033	0.158981	-0.45399	-1.82809
11.8333	1.03846	1.31678	0.146721	0.463033	0.188759	-0.36399	-1.93142
11.85	1.02846	1.22678	0.266721	0.478033	0.220537	-0.29732	-1.92475
11.8667	1.00724	1.15011	0.350055	0.353033	0.252426	-0.43066	-1.82142
11.8833	0.979685	1.08678	0.386721	0.323033	0.287981	-0.49066	-1.70475
11.9	0.951907	1.05344	0.443388	0.343033	0.322981	-0.48399	-1.61809
11.9167	0.923796	1.04344	0.536721	0.333033	0.363981	-0.34066	-1.54809
11.9333	0.894574	0.960109	0.616721	0.183033	0.40987	-0.22399	-1.47809
11.95	0.863796	1.02011	0.650055	0.058033	0.456315	-0.14399	-1.54809
11.9667	0.836352	1.22344	0.726721	-0.10197	0.501093	-0.14732	-1.59475
11.9833	0.811463	1.31344	0.620055	-0.26697	0.54387	-0.18732	-1.61809
12	0.781241	1.33344	0.626721	-0.23697	0.579648	-0.23732	-1.63475
