# Supplementary material for: TRPV1 drugs alter core body temperature via central projections of primary afferent sensory neurons
Source: eLife. 2022 Aug 15;11:e80139. doi: 10.7554/eLife.80139 (PMC9377796; doi:10.7554/eLife.80139)
Supplement: Figure 2—source data 2. [file elife-80139-fig2-data2.xlsx]

## Sheet: PirtCre Warm
Time	Trpv1fl/fl	Trpv1fl/fl	Trpv1fl/fl	Trpv1fl/fl	Trpv1fl/fl	Trpv1fl/fl	PirtCre;Trpv1fl/fl	PirtCre;Trpv1fl/fl	PirtCre;Trpv1fl/fl	PirtCre;Trpv1fl/fl	PirtCre;Trpv1fl/fl	PirtCre;Trpv1fl/fl	PirtCre;Trpv1fl/fl
	Q234	Q235	Q261	R274	S025	S026	Q233	Q259	Q260	R275	R277	S023	S024
-1	34.97	36.31	35.26	35.86	36.1	35.61	33.94	36.99	34.83	36.73	35.63	35.65	35.98
-0.98333	34.94	35.87	35.34	35.77	36.08	35.59	34.13	37.01	34.84	36.72	35.63	35.63	36.04
-0.96667	34.92	35.83	35.36	35.91	36.01	35.69	34.35	37.04	34.9	36.68	35.63	35.61	36.11
-0.95	34.91	35.84	35.38	35.93	35.94	35.91	34.57	37.09	34.97	36.66	35.63	35.59	36.14
-0.93333	34.91	35.87	35.38	35.96	35.87	35.95	34.9	37.12	35.05	36.62	35.64	35.62	36.33
-0.91667	34.91	36.03	35.39	36.03	35.83	35.96	35.2	37.11	35.09	36.49	35.67	35.7	36.39
-0.9	34.91	36.16	35.4	36	35.73	35.89	35.43	37.06	35.12	36.56	35.71	35.76	36.49
-0.88333	34.94	36.19	35.4	35.92	35.54	35.77	35.55	37.06	35.07	36.77	35.75	35.72	36.56
-0.86667	34.99	36.43	35.38	35.86	35.47	35.75	35.6	36.96	35	37.01	35.76	35.7	36.55
-0.85	35	36.67	35.38	35.78	35.49	35.75	35.58	36.65	34.99	37.28	35.76	35.71	36.3
-0.83333	35.07	36.66	35.47	35.7	35.58	35.74	35.51	36.45	34.96	37.52	35.76	35.57	36.08
-0.81667	35.16	36.6	35.53	35.63	35.58	35.75	35.44	36.29	35.09	37.73	35.75	35.53	35.98
-0.8	35.22	36.65	35.55	35.58	35.54	35.75	35.42	36.11	35.16	38.01	35.71	35.63	35.9
-0.78333	35.25	36.78	35.56	35.54	35.48	35.7	35.42	35.87	35.42	38.14	35.61	35.75	35.89
-0.76667	35.26	36.82	35.54	35.52	35.49	35.65	35.52	35.83	35.49	38.09	35.51	35.88	35.84
-0.75	35.26	36.78	35.53	35.5	35.49	35.63	35.6	35.86	35.59	37.88	35.38	36.02	35.84
-0.73333	35.23	36.66	35.59	35.47	35.45	35.63	35.53	35.98	35.71	37.66	35.24	36.07	35.83
-0.71667	35.12	36.61	35.7	35.47	35.42	35.63	35.33	36.38	35.75	37.57	35.22	36.05	35.84
-0.7	35.03	36.56	35.73	35.5	35.4	35.65	35.4	36.49	35.76	37.5	35.23	36.04	35.91
-0.68333	35	36.49	35.74	35.51	35.35	35.65	36.19	36.48	35.75	37.39	35.26	36.12	35.95
-0.66667	34.97	36.43	35.74	35.48	35.35	35.64	36.3	36.5	35.72	37.38	35.29	36.17	35.99
-0.65	34.96	36.38	35.69	35.43	35.36	35.59	36.22	36.49	35.67	37.43	35.38	36.32	36.21
-0.63333	34.95	36.29	35.6	35.39	35.3	35.61	36.14	36.44	35.65	37.44	35.47	36.63	36.26
-0.61667	34.98	36.23	35.59	35.36	35.24	35.7	35.96	36.37	35.63	37.37	35.62	36.76	36.26
-0.6	35.05	36.18	35.63	35.33	35.15	35.77	35.93	36.29	35.62	37.13	35.69	36.83	36.26
-0.58333	35.08	36.11	35.71	35.3	35.1	35.82	35.95	36.21	35.58	36.83	35.75	36.8	36.26
-0.56667	35.11	36.03	35.76	35.26	35.09	35.86	35.95	36.14	35.5	36.85	35.75	36.67	36.25
-0.55	35.22	35.96	35.85	35.23	35.07	35.89	35.84	36.06	35.4	36.86	35.75	36.57	36.22
-0.53333	35.28	35.87	36	35.2	35.06	35.93	35.72	35.97	35.33	36.83	35.76	36.45	36.16
-0.51667	35.33	35.8	36.12	35.2	35.02	35.95	35.7	35.88	35.29	36.79	35.75	36.26	36.09
-0.5	35.47	35.71	36.15	35.18	34.97	35.95	35.52	35.79	35.24	36.82	35.72	36.21	36.05
-0.48333	35.48	35.65	36.15	35.09	34.93	35.83	35.4	35.81	35.23	36.95	35.69	36.17	36.02
-0.46667	35.43	35.6	36.15	35.03	34.86	35.75	35.36	35.82	35.23	36.87	35.64	36.17	35.98
-0.45	35.36	35.67	36.13	34.99	34.77	35.71	35.34	35.73	35.19	36.63	35.57	36.22	35.95
-0.43333	35.35	35.7	36.12	34.97	34.81	35.79	35.47	35.62	35.13	36.58	35.51	36.38	35.94
-0.41667	35.82	35.72	36.08	34.96	34.84	35.83	35.7	35.55	35.07	36.46	35.5	36.42	35.93
-0.4	35.86	35.72	36.03	34.96	34.87	35.83	35.81	35.49	35.02	36.28	35.5	36.42	35.92
-0.38333	35.75	35.71	36	35.07	34.93	35.76	35.83	35.41	35.01	36.09	35.5	36.38	35.9
-0.36667	35.83	35.66	35.97	35.11	34.98	35.6	35.83	35.35	35.29	36.06	35.49	36.32	35.88
-0.35	35.9	35.62	35.97	35.1	35	35.6	35.82	35.31	35.43	36.06	35.48	36.25	35.85
-0.33333	35.89	35.58	35.86	35.13	34.99	35.92	35.79	35.28	35.48	36	35.49	36.18	35.81
-0.31667	35.76	35.54	35.85	35.14	34.9	35.96	35.74	35.24	35.51	35.91	35.49	36.11	35.78
-0.3	35.79	35.53	35.97	35.14	34.82	36	35.69	35.2	35.52	35.83	35.48	36.03	35.8
-0.28333	35.96	35.5	36.03	35.12	34.82	35.97	35.59	35.16	35.52	35.75	35.47	35.96	35.82
-0.26667	35.97	35.47	36.08	35.11	34.87	36.05	35.51	35.1	35.52	35.7	35.45	35.89	35.8
-0.25	35.87	35.43	36.12	35.1	34.88	36.19	35.45	35.04	35.52	35.64	35.44	35.83	35.8
-0.23333	35.84	35.39	36.14	35.09	34.86	36.21	35.35	34.99	35.52	35.57	35.44	35.77	35.84
-0.21667	35.8	35.35	36.25	35.07	34.9	36.17	35.21	34.95	35.51	35.49	35.44	35.72	35.85
-0.2	35.76	35.31	36.28	35.06	35.07	36.09	35.04	34.92	35.46	35.33	35.43	35.7	35.82
-0.18333	35.77	35.29	36.32	35.06	35.08	36.13	34.95	34.89	35.37	35.19	35.44	35.69	35.79
-0.16667	35.79	35.3	36.43	35.06	35.05	36.31	34.9	34.87	35.37	35.11	35.5	35.69	35.76
-0.15	35.88	35.29	36.43	35.06	35.01	36.37	34.83	34.9	35.38	35.06	35.58	35.7	35.71
-0.13333	35.94	35.26	36.43	35.05	34.97	36.38	34.74	34.94	35.38	35.05	35.59	35.71	35.62
-0.11667	35.93	35.22	36.47	35.02	35	36.32	34.65	34.96	35.38	35.02	35.38	35.74	35.56
-0.1	35.84	35.19	36.52	34.99	35.02	36.23	34.62	34.96	35.36	35	34.93	35.74	35.55
-0.08333	35.81	35.17	36.51	34.98	35.03	36.15	34.6	34.96	35.33	34.97	34.9	35.73	35.55
-0.06667	35.81	35.14	36.44	34.92	35.02	36.08	34.56	34.96	35.31	34.91	34.97	35.74	35.55
-0.05	35.8	35.07	36.4	34.84	34.96	36.02	34.57	34.91	35.25	34.84	35.17	35.77	35.55
-0.03333	35.77	34.92	36.37	34.87	34.95	35.96	34.56	34.87	35.19	34.76	35.31	35.85	35.59
-0.01667	35.75	34.84	36.33	34.93	34.95	35.89	34.55	34.83	35.19	34.69	35.3	35.91	35.56
0	35.63	34.81	36.31	34.99	34.92	35.83	34.57	34.81	35.2	34.71	35.29	35.93	35.55
0.016667	35.5	34.8	36.27	35.02	34.9	35.79	34.58	34.84	35.2	34.96	35.29	35.92	35.56
0.033333	35.51	34.79	36.22	35.11	34.89	35.77	34.59	34.94	35.2	35.22	35.31	35.89	35.58
0.05	35.52	34.78	36.17	35.24	34.82	35.87	34.59	34.95	35.18	35.35	35.34	35.87	35.59
0.066667	35.35	34.91	36.14	35.39	34.65	35.99	34.56	34.96	35.14	35.43	35.36	35.87	35.6
0.083333	35.26	34.93	36.13	35.62	34.47	36.01	34.5	35.03	35.18	35.52	35.37	35.87	35.61
0.1	35.44	34.95	36.12	35.69	34.42	36.02	34.47	35.19	35.32	35.62	35.31	35.89	35.6
0.116667	35.53	35.01	36.06	35.72	34.44	36.01	34.48	35.37	35.35	35.65	35.22	35.9	35.65
0.133333	35.54	35.02	35.98	36.5	34.54	36	34.51	35.55	35.36	35.83	35.13	35.91	35.69
0.15	35.56	34.96	35.95	36.84	34.72	35.99	34.57	35.75	35.38	36.02	35.47	35.92	35.72
0.166667	35.57	34.72	35.92	37	34.76	35.99	34.65	35.88	35.44	36.47	35.7	35.91	35.77
0.183333	35.56	34.88	35.9	37.05	34.77	35.99	34.75	36.02	35.5	36.73	35.79	35.95	35.79
0.2	35.56	34.92	35.87	37.12	34.86	35.99	34.88	36.25	35.59	37.22	36.01	35.98	35.78
0.216667	35.56	34.85	35.87	37.17	35.13	35.96	35.02	36.38	35.76	37.63	36.41	35.99	35.76
0.233333	35.53	34.73	35.86	37.21	35.86	35.96	35.16	36.5	35.91	37.9	36.6	35.99	35.82
0.25	35.43	34.77	35.85	37.28	36.03	35.96	35.3	36.56	36.08	38.17	36.89	36.02	36.02
0.266667	35.32	34.85	35.82	37.35	36.23	36	35.44	36.63	36.18	38.24	37.18	36.04	36.02
0.283333	35.43	34.99	35.77	37.5	36.36	36.12	35.58	36.7	36.26	38.32	37.41	36	35.98
0.3	35.69	35.14	35.49	37.56	36.53	36.2	35.79	36.81	36.41	38.26	37.47	35.99	36.11
0.316667	35.9	35.34	35.42	37.64	36.69	36.25	36.02	36.87	36.47	38	37.43	35.99	36.2
0.333333	36.02	35.47	35.57	37.69	36.89	36.29	36.06	37.01	36.66	37.87	37.37	35.97	36.26
0.35	36.18	35.62	35.63	37.72	36.97	36.3	36.09	37.11	36.83	37.78	37.35	35.95	36.29
0.366667	36.22	35.86	35.64	37.71	36.98	36.28	36.24	37.19	36.97	37.89	37.29	35.93	36.29
0.383333	36.33	35.93	35.67	37.59	37.02	36.2	36.43	37.27	37.2	38.02	37.19	35.91	36.28
0.4	36.45	35.93	35.88	37.39	37.19	36.18	36.59	37.39	37.35	38.26	37.18	35.91	36.27
0.416667	36.58	36	36.07	37.27	37.23	36.29	36.75	37.44	37.52	38.43	37.27	35.9	36.28
0.433333	36.71	36.14	36.13	37.33	37.21	36.42	36.9	37.4	37.63	38.57	37.27	35.89	36.26
0.45	36.74	36.19	36.16	37.39	37	36.56	37.08	37.39	37.68	38.6	37.23	35.88	36.23
0.466667	36.83	36.25	36.22	37.5	36.86	36.68	37.15	37.41	37.78	38.59	37.17	35.86	36.12
0.483333	36.89	36.46	36.27	37.57	36.87	36.76	37.18	37.41	37.87	38.64	37.11	35.78	36.01
0.5	36.9	36.47	36.43	37.63	37.02	36.83	37.24	37.42	37.91	38.7	37.13	35.71	35.91
0.516667	36.97	36.44	36.6	37.66	37.17	36.86	37.29	37.43	37.95	38.73	37.22	35.66	36.07
0.533333	37.1	36.58	36.77	37.68	37.22	36.87	37.46	37.41	37.98	38.7	37.23	35.6	36.36
0.55	37.19	36.69	36.84	37.72	37.2	36.88	37.52	37.42	37.98	38.57	37.21	35.62	36.45
0.566667	37.3	36.72	36.84	37.82	37.12	37	37.52	37.46	37.95	38.45	37.2	35.68	36.48
0.583333	37.33	36.73	36.84	37.84	37.12	37.13	37.45	37.46	37.97	38.36	37.15	35.74	36.57
0.6	37.25	36.7	36.85	37.79	37.15	37.17	37.36	37.47	37.98	38.28	37.1	35.76	36.7
0.616667	37.18	36.53	36.89	37.74	37.12	37.3	37.28	37.55	37.97	38.2	37.08	35.76	36.96
0.633333	37.15	36.48	36.91	37.66	37.18	37.37	37.3	37.61	37.97	38.13	37.12	35.79	37.33
0.65	37.29	36.5	36.94	37.64	37.32	37.35	37.47	37.68	37.99	38.23	37.16	35.83	37.36
0.666667	37.34	36.68	36.95	37.63	37.35	37.4	37.61	37.72	38.01	38.35	37.17	35.93	37.29
0.683333	37.34	36.82	36.97	37.63	37.41	37.47	37.7	37.79	38	38.55	37.18	35.96	37.26
0.7	37.31	36.91	36.97	37.61	37.47	37.51	37.79	37.81	38.02	38.67	37.18	35.99	37.33
0.716667	37.19	36.85	36.94	37.61	37.48	37.52	37.86	37.83	38.08	38.71	37.12	36.02	37.39
0.733333	37.11	36.8	36.96	37.63	37.49	37.5	37.86	37.89	38.15	38.76	37.03	36.1	37.39
0.75	37.05	36.75	37.05	37.69	37.44	37.49	37.84	37.97	38.17	38.76	36.83	36.23	37.25
0.766667	37.03	36.66	37.08	37.7	37.43	37.56	37.88	38	38.21	38.71	36.66	36.34	37.27
0.783333	37.03	36.6	37.09	37.65	37.6	37.58	37.88	38.06	38.31	38.72	36.82	36.43	37.61
0.8	37.12	36.52	37.23	37.69	37.63	37.64	37.86	38.11	38.35	38.73	36.93	36.62	37.66
0.816667	37.19	36.56	37.26	37.77	37.69	37.72	37.84	38.17	38.4	38.69	37	36.9	37.63
0.833333	37.18	36.65	37.28	37.76	37.73	37.74	37.84	38.25	38.41	38.61	37.09	37.1	37.62
0.85	37.17	36.72	37.35	37.78	37.71	37.75	37.83	38.3	38.36	38.49	37.15	37.29	37.65
0.866667	37.32	36.81	37.41	37.79	37.66	37.73	37.82	38.36	38.19	38.37	37.18	37.49	37.77
0.883333	37.36	36.95	37.41	37.7	37.52	37.71	37.82	38.41	38.13	38.3	37.1	37.7	37.91
0.9	37.43	37.01	37.42	37.68	37.42	37.76	37.85	38.43	38.06	38.25	37.07	37.78	37.86
0.916667	37.45	37.08	37.45	37.67	37.43	37.8	37.9	38.44	38.02	38.22	37.13	37.87	37.76
0.933333	37.55	37.22	37.58	37.67	37.46	37.79	37.88	38.4	38.01	38.17	37.21	37.95	37.71
0.95	37.64	37.23	37.64	37.69	37.54	37.73	37.84	38.38	38	38.12	37.24	38.16	37.76
0.966667	37.79	37.16	37.65	37.7	37.6	37.74	37.85	38.32	38	38.09	37.24	38.25	37.98
0.983333	37.85	37.23	37.64	37.66	37.62	37.74	37.88	38.31	38.05	38.1	37.25	38.32	38.03
1	37.94	37.43	37.63	37.6	37.69	37.72	37.95	38.32	38.04	38.1	37.27	38.42	37.95
1.01667	38.03	37.44	37.63	37.59	37.73	37.73	37.98	38.32	38.04	38.1	37.33	38.51	38
1.03333	38.06	37.38	37.66	37.61	37.8	37.73	38.02	38.25	38.1	38.11	37.4	38.59	38.06
1.05	38.07	37.37	37.68	37.61	37.83	37.67	38.06	38.22	38.14	38.11	37.44	38.63	38.12
1.06667	38.06	37.39	37.67	37.62	37.82	37.65	38.07	38.2	38.15	38.1	37.47	38.7	38.31
1.08333	38.03	37.4	37.68	37.68	37.78	37.65	38.08	38.17	38.16	38.06	37.55	38.77	38.47
1.1	37.96	37.37	37.71	37.71	37.67	37.65	38.1	38.19	38.22	38.04	37.61	38.81	38.4
1.11667	37.99	37.4	37.78	37.78	37.62	37.65	38.09	38.24	38.22	38.04	37.69	38.83	38.44
1.13333	38.11	37.4	37.81	37.87	37.66	37.65	38.11	38.3	38.21	38.04	37.87	38.81	38.51
1.15	38.17	37.38	37.85	37.91	37.69	37.59	38.16	38.33	38.21	38.05	37.94	38.8	38.44
1.16667	38.2	37.45	37.86	37.88	37.73	37.58	38.17	38.37	38.23	38.09	37.98	38.81	38.36
1.18333	38.39	37.56	37.89	37.9	37.83	37.65	38.22	38.43	38.3	38.14	38.05	38.81	38.37
1.2	38.49	37.64	37.91	37.92	37.85	37.65	38.29	38.54	38.37	38.15	38.1	38.81	38.42
1.21667	38.54	37.62	37.97	37.97	37.84	37.6	38.3	38.55	38.4	38.14	38.11	38.81	38.4
1.23333	38.55	37.57	37.97	38.09	37.8	37.58	38.27	38.55	38.41	38.14	38.12	38.86	38.38
1.25	38.57	37.56	37.94	38.13	37.72	37.56	38.27	38.55	38.46	38.12	38.12	38.92	38.34
1.26667	38.65	37.55	37.89	38.09	37.67	37.58	38.23	38.58	38.51	38.1	38.11	38.93	38.4
1.28333	38.68	37.57	37.87	38.05	37.65	37.59	38.21	38.59	38.57	38.09	38.13	38.93	38.56
1.3	38.69	37.63	37.87	38.05	37.69	37.6	38.24	38.59	38.6	38.09	38.14	38.96	38.54
1.31667	38.73	37.68	37.86	38.11	37.73	37.62	38.22	38.63	38.66	38.1	38.13	38.96	38.5
1.33333	38.75	37.71	37.85	38.1	37.79	37.66	38.19	38.74	38.67	38.12	38.12	38.91	38.56
1.35	38.69	37.8	37.78	38.06	37.83	37.66	38.19	38.77	38.65	38.11	38.15	38.91	38.57
1.36667	38.69	37.86	37.73	38.1	37.85	37.6	38.21	38.77	38.57	38.06	38.16	38.97	38.54
1.38333	38.76	37.91	37.73	38.16	37.89	37.57	38.27	38.74	38.52	38.09	38.13	38.99	38.45
1.4	38.82	37.92	37.8	38.24	37.94	37.62	38.31	38.71	38.56	38.11	38.13	39	38.45
1.41667	38.83	37.93	37.86	38.41	37.96	37.61	38.31	38.71	38.64	38.11	38.23	38.97	38.46
1.43333	38.85	38.03	37.92	38.47	38.01	37.59	38.33	38.71	38.73	38.09	38.28	38.89	38.5
1.45	38.87	38.09	37.96	38.46	38.07	37.68	38.35	38.71	38.77	38.14	38.27	38.85	38.52
1.46667	38.86	38.07	37.96	38.4	38.08	37.68	38.37	38.71	38.71	38.18	38.24	38.86	38.54
1.48333	38.8	38	37.94	38.4	38.09	37.66	38.41	38.74	38.57	38.16	38.21	38.86	38.58
1.5	38.75	38.01	37.92	38.45	38.08	37.69	38.55	38.75	38.57	38.13	38.2	38.87	38.54
1.51667	38.8	38.02	37.94	38.51	38.08	37.73	38.62	38.74	38.64	38.11	38.21	38.91	38.51
1.53333	38.93	38	37.96	38.56	38.08	37.78	38.69	38.76	38.68	38.15	38.24	38.94	38.54
1.55	39.02	38.1	37.94	38.57	38.07	37.86	38.73	38.83	38.69	38.2	38.21	38.91	38.62
1.56667	39.04	38.18	37.92	38.57	38.07	37.87	38.73	38.91	38.69	38.26	38.17	38.75	38.66
1.58333	39.02	38.19	37.92	38.55	38.1	37.87	38.73	38.99	38.67	38.29	38.19	38.6	38.66
1.6	38.93	38.17	37.92	38.54	38.19	37.85	38.76	39.03	38.62	38.29	38.21	38.52	38.64
1.61667	38.92	38.15	37.93	38.56	38.28	37.77	38.79	39.08	38.59	38.35	38.24	38.49	38.65
1.63333	38.93	38.19	37.95	38.58	38.35	37.76	38.81	39.09	38.58	38.35	38.27	38.47	38.67
1.65	38.96	38.2	37.95	38.6	38.41	37.84	38.8	39.1	38.57	38.37	38.27	38.41	38.69
1.66667	39.03	38.19	37.93	38.65	38.44	37.87	38.76	39.1	38.7	38.39	38.23	38.4	38.66
1.68333	39.06	38.2	37.93	38.66	38.5	37.9	38.71	39.16	38.78	38.42	38.24	38.41	38.59
1.7	39.04	38.22	37.93	38.68	38.57	37.9	38.69	39.21	38.81	38.47	38.26	38.44	38.57
1.71667	39.03	38.22	37.96	38.77	38.63	37.85	38.74	39.22	38.81	38.59	38.29	38.53	38.56
1.73333	39.01	38.18	38.03	38.83	38.66	37.89	38.77	39.23	38.83	38.64	38.33	38.68	38.56
1.75	39.05	38.14	38.1	38.87	38.65	37.92	38.82	39.28	38.86	38.73	38.38	38.81	38.6
1.76667	39.09	38.16	38.13	38.95	38.62	37.86	38.84	39.33	38.86	38.74	38.38	38.88	38.64
1.78333	39.09	38.19	38.15	38.98	38.62	37.74	38.87	39.39	38.89	38.77	38.35	38.97	38.73
1.8	39.04	38.24	38.18	39.01	38.64	37.79	38.95	39.44	38.94	38.8	38.34	39.05	38.84
1.81667	38.99	38.24	38.15	39.03	38.68	37.85	39.01	39.47	39	38.9	38.33	39.07	38.87
1.83333	39.06	38.22	38.1	39.06	38.68	37.85	39.03	39.48	39.05	38.96	38.34	39.08	38.92
1.85	39.12	38.2	38.1	39.07	38.64	37.85	39.07	39.51	39.09	38.97	38.39	39.09	38.94
1.86667	39.15	38.22	38.11	39.09	38.57	37.86	39.14	39.56	39.11	38.95	38.45	39.09	38.97
1.88333	39.18	38.29	38.15	39.1	38.55	37.81	39.15	39.6	39.15	38.93	38.47	39.08	38.96
1.9	39.17	38.34	38.21	39.06	38.58	37.7	39.08	39.62	39.18	38.91	38.5	39.05	38.94
1.91667	39.15	38.35	38.24	39.03	38.64	37.61	39.05	39.68	39.19	38.93	38.54	39.03	38.93
1.93333	39.19	38.35	38.22	39.06	38.65	37.59	39.06	39.71	39.24	38.93	38.59	39.03	38.88
1.95	39.21	38.35	38.19	39.16	38.63	37.57	39.08	39.72	39.25	38.94	38.59	39.04	38.85
1.96667	39.21	38.35	38.2	39.2	38.58	37.54	39.08	39.74	39.26	38.96	38.59	39.05	38.8
1.98333	39.23	38.39	38.21	39.27	38.56	37.51	39.05	39.77	39.29	39.05	38.65	39.01	38.76
2	39.27	38.53	38.21	39.37	38.57	37.46	39.02	39.83	39.29	39.14	38.68	38.92	38.76
2.01667	39.28	38.6	38.25	39.39	38.55	37.44	38.98	39.87	39.24	39.18	38.72	38.83	38.75
2.03333	39.29	38.62	38.26	39.39	38.55	37.42	39.03	39.89	39.25	39.19	38.8	38.82	38.71
2.05	39.33	38.61	38.26	39.4	38.56	37.44	39.08	39.93	39.26	39.2	38.9	38.85	38.7
2.06667	39.36	38.55	38.25	39.42	38.57	37.43	39.11	39.95	39.26	39.21	38.95	38.87	38.75
2.08333	39.34	38.47	38.26	39.43	38.6	37.39	39.15	39.93	39.3	39.28	39	38.9	38.76
2.1	39.37	38.46	38.28	39.49	38.7	37.39	39.21	39.93	39.37	39.32	38.98	38.91	38.68
2.11667	39.37	38.52	38.35	39.54	38.78	37.4	39.24	39.97	39.44	39.39	38.96	38.99	38.52
2.13333	39.34	38.6	38.39	39.58	38.83	37.41	39.25	39.98	39.53	39.43	38.98	39.04	38.61
2.15	39.31	38.62	38.37	39.61	38.85	37.4	39.25	39.99	39.54	39.44	39.02	39.08	38.85
2.16667	39.31	38.62	38.34	39.6	38.84	37.39	39.29	39.98	39.5	39.48	39.07	39.13	39.17
2.18333	39.34	38.62	38.34	39.6	38.8	37.39	39.3	40	39.49	39.54	39.12	39.22	39.26
2.2	39.37	38.61	38.36	39.68	38.79	37.39	39.3	40.02	39.53	39.56	39.12	39.23	39.27
2.21667	39.4	38.63	38.37	39.7	38.84	37.41	39.32	40.02	39.54	39.58	39.07	39.18	39.29
2.23333	39.35	38.64	38.42	39.75	38.83	37.42	39.31	40.01	39.5	39.6	39.08	39.18	39.32
2.25	39.31	38.65	38.45	39.77	38.83	37.44	39.29	40.01	39.46	39.59	39.08	39.2	39.36
2.26667	39.35	38.65	38.44	39.75	38.87	37.48	39.32	40.05	39.44	39.56	39.02	39.25	39.39
2.28333	39.39	38.66	38.37	39.76	38.91	37.6	39.39	40.07	39.41	39.54	39.05	39.31	39.41
2.3	39.39	38.72	38.35	39.79	38.94	37.7	39.43	40.07	39.4	39.54	39.13	39.39	39.43
2.31667	39.4	38.73	38.36	39.8	38.98	37.79	39.43	40.07	39.39	39.52	39.17	39.48	39.42
2.33333	39.51	38.76	38.38	39.76	39.02	37.84	39.39	40.08	39.41	39.52	39.17	39.55	39.39
2.35	39.54	38.81	38.41	39.72	38.94	37.9	39.39	40.08	39.4	39.54	39.17	39.58	39.41
2.36667	39.58	38.8	38.53	39.73	38.92	37.91	39.4	40.08	39.4	39.54	39.16	39.59	39.43
2.38333	39.61	38.7	38.56	39.74	38.92	37.93	39.45	40.08	39.4	39.56	39.18	39.57	39.42
2.4	39.63	38.7	38.56	39.74	38.9	37.93	39.47	40.08	39.39	39.57	39.22	39.53	39.46
2.41667	39.68	38.69	38.55	39.75	38.86	37.93	39.48	40.06	39.4	39.58	39.24	39.54	39.56
2.43333	39.67	38.68	38.52	39.71	38.82	37.97	39.5	40.04	39.42	39.57	39.25	39.59	39.58
2.45	39.67	38.7	38.55	39.7	38.85	38	39.5	40.05	39.42	39.6	39.25	39.65	39.55
2.46667	39.71	38.77	38.64	39.7	38.83	38.02	39.44	40.08	39.42	39.61	39.25	39.66	39.55
2.48333	39.72	38.84	38.64	39.6	38.84	38.03	39.45	40.09	39.43	39.61	39.27	39.64	39.54
2.5	39.72	38.88	38.67	39.58	38.94	38.02	39.46	40.13	39.51	39.57	39.31	39.64	39.5
2.51667	39.71	38.93	38.77	39.6	38.97	38.03	39.46	40.18	39.54	39.56	39.36	39.63	39.49
2.53333	39.63	38.96	38.79	39.62	38.98	38.03	39.43	40.2	39.56	39.6	39.39	39.63	39.48
2.55	39.6	38.97	38.79	39.64	38.93	38.03	39.47	40.19	39.59	39.6	39.41	39.6	39.44
2.56667	39.7	38.94	38.78	39.62	38.9	38.03	39.52	40.19	39.61	39.59	39.43	39.6	39.45
2.58333	39.75	38.94	38.76	39.55	38.92	38	39.52	40.18	39.65	39.67	39.46	39.61	39.48
2.6	39.76	38.94	38.72	39.52	38.92	37.99	39.5	40.15	39.66	39.71	39.49	39.62	39.46
2.61667	39.73	38.9	38.69	39.62	38.87	38.01	39.48	40.14	39.66	39.76	39.49	39.68	39.37
2.63333	39.69	38.85	38.69	39.68	38.83	38.03	39.48	40.14	39.67	39.77	39.51	39.73	39.48
2.65	39.71	38.84	38.73	39.67	38.79	38.02	39.47	40.12	39.68	39.76	39.55	39.74	39.54
2.66667	39.67	38.86	38.84	39.65	38.74	38.01	39.47	40.11	39.68	39.82	39.62	39.7	39.59
2.68333	39.6	38.9	38.87	39.68	38.71	38.08	39.46	40.1	39.69	39.86	39.63	39.67	39.6
2.7	39.66	38.93	38.9	39.66	38.67	38.2	39.47	40.1	39.71	39.85	39.7	39.66	39.58
2.71667	39.67	38.96	38.95	39.6	38.67	38.27	39.48	40.1	39.71	39.84	39.82	39.69	39.61
2.73333	39.71	39.05	38.97	39.6	38.67	38.3	39.48	40.11	39.68	39.85	39.83	39.7	39.69
2.75	39.76	39.09	38.97	39.61	38.64	38.27	39.5	40.11	39.69	39.84	39.8	39.68	39.73
2.76667	39.79	39.11	38.99	39.58	38.58	38.25	39.51	40.13	39.71	39.82	39.79	39.67	39.74
2.78333	39.8	39.08	39.02	39.57	38.5	38.26	39.53	40.19	39.71	39.8	39.77	39.67	39.79
2.8	39.8	39.06	39.06	39.58	38.43	38.25	39.54	40.2	39.71	39.79	39.72	39.64	39.85
2.81667	39.81	38.97	39.07	39.63	38.36	38.18	39.57	40.2	39.67	39.79	39.72	39.68	39.86
2.83333	39.84	38.97	39.07	39.66	38.29	38.12	39.61	40.2	39.65	39.75	39.8	39.74	39.79
2.85	39.88	38.97	39.07	39.65	38.22	38.18	39.6	40.17	39.66	39.77	39.85	39.78	39.75
2.86667	39.89	38.92	39.06	39.64	38.15	38.21	39.59	40.19	39.66	39.8	39.83	39.77	39.77
2.88333	39.81	38.89	39.04	39.6	38.08	38.24	39.61	40.2	39.66	39.79	39.81	39.74	39.78
2.9	39.74	38.94	39.01	39.59	38	38.24	39.62	40.21	39.65	39.77	39.85	39.75	39.79
2.91667	39.7	38.92	38.99	39.62	37.94	38.24	39.6	40.21	39.6	39.79	39.9	39.81	39.77
2.93333	39.81	38.92	39.01	39.63	37.88	38.32	39.59	40.17	39.56	39.82	39.91	39.85	39.68
2.95	39.85	38.98	39.02	39.59	37.82	38.34	39.56	40.17	39.56	39.83	39.92	39.85	39.66
2.96667	39.82	39.05	39.02	39.59	37.76	38.36	39.54	40.2	39.57	39.86	39.92	39.86	39.72
2.98333	39.81	39.11	39.04	39.6	37.79	38.4	39.54	40.22	39.59	39.86	39.9	39.9	39.73
3	39.84	39.15	39.04	39.67	37.93	38.45	39.53	40.21	39.62	39.87	39.84	39.91	39.7
3.01667	39.84	39.18	39.04	39.66	38.03	38.45	39.53	40.19	39.62	39.93	39.84	39.88	39.68
3.03333	39.8	39.16	39.04	39.62	38.13	38.39	39.53	40.18	39.63	39.95	39.86	39.95	39.7
3.05	39.78	39.11	39.03	39.58	38.14	38.31	39.55	40.18	39.66	39.95	39.83	39.97	39.71
3.06667	39.75	39.15	39.04	39.49	38.18	38.35	39.59	40.19	39.7	39.88	39.72	39.96	39.7
3.08333	39.81	39.13	39.04	39.51	38.21	38.37	39.59	40.2	39.71	39.89	39.71	39.94	39.74
3.1	39.84	38.98	39.04	39.61	38.22	38.43	39.58	40.21	39.71	39.9	39.74	39.94	39.81
3.11667	39.85	38.96	39.04	39.66	38.2	38.53	39.57	40.2	39.69	39.89	39.78	39.97	39.85
3.13333	39.83	38.97	39.04	39.69	38.13	38.6	39.59	40.19	39.71	39.88	39.84	39.98	39.85
3.15	39.79	39.02	39.05	39.69	38.13	38.59	39.6	40.17	39.73	39.89	39.84	39.95	39.83
3.16667	39.78	39.16	39.04	39.64	38.14	38.52	39.59	40.17	39.75	39.91	39.8	39.95	39.8
3.18333	39.76	39.21	38.99	39.63	38.15	38.5	39.53	40.2	39.74	39.95	39.8	39.99	39.9
3.2	39.81	39.19	38.99	39.67	38.18	38.48	39.52	40.24	39.73	40	39.81	40.03	39.91
3.21667	39.83	39.09	39	39.67	38.21	38.47	39.52	40.21	39.76	40.02	39.79	40.04	39.93
3.23333	39.88	39.11	39.03	39.68	38.23	38.49	39.54	40.19	39.77	40.03	39.79	40.01	39.94
3.25	39.88	39.09	39.09	39.68	38.3	38.49	39.56	40.14	39.77	40.01	39.76	39.99	39.94
3.26667	39.83	39.03	39.1	39.67	38.39	38.49	39.55	40.14	39.77	39.98	39.76	39.97	39.93
3.28333	39.84	39.07	39.12	39.67	38.41	38.53	39.53	40.14	39.76	39.98	39.81	39.97	39.89
3.3	39.93	39.16	39.16	39.71	38.35	38.56	39.54	40.14	39.67	39.99	39.87	40	39.86
3.31667	39.98	39.22	39.17	39.73	38.21	38.58	39.62	40.13	39.63	40	39.87	40.01	39.89
3.33333	39.99	39.23	39.18	39.7	38.14	38.57	39.63	40.11	39.65	40	39.88	39.99	39.91
3.35	39.99	39.23	39.23	39.66	38.13	38.55	39.64	40.1	39.65	40.01	39.93	39.98	39.91
3.36667	40	39.24	39.28	39.62	38.12	38.54	39.7	40.09	39.66	40.07	39.98	40.01	39.92
3.38333	39.97	39.24	39.31	39.59	38.17	38.59	39.7	40.12	39.66	40.1	40.03	40.02	39.91
3.4	39.91	39.25	39.33	39.65	38.3	38.62	39.69	40.12	39.64	40.13	40.06	40.04	39.87
3.41667	39.92	39.29	39.32	39.71	38.41	38.61	39.65	40.1	39.62	40.14	40.04	40.03	39.87
3.43333	39.92	39.41	39.31	39.78	38.47	38.58	39.64	40.1	39.62	40.15	40.01	39.99	39.84
3.45	39.87	39.4	39.33	39.78	38.48	38.56	39.64	40.09	39.64	40.1	40.01	40.02	39.81
3.46667	39.78	39.35	39.34	39.79	38.42	38.55	39.65	40.04	39.68	39.96	40	40.08	39.86
3.48333	39.71	39.38	39.34	39.8	38.32	38.52	39.65	40.04	39.72	39.97	39.97	40.12	39.87
3.5	39.78	39.41	39.35	39.79	38.28	38.44	39.65	40.06	39.73	40.02	39.97	40.16	39.85
3.51667	39.81	39.44	39.34	39.8	38.28	38.52	39.68	40.08	39.73	40.07	39.98	40.15	39.84
3.53333	39.78	39.47	39.33	39.81	38.3	38.62	39.71	40.13	39.74	40.1	40.01	40.14	39.8
3.55	39.8	39.51	39.35	39.9	38.42	38.66	39.71	40.13	39.77	40.1	40.06	40.2	39.82
3.56667	39.84	39.51	39.38	39.9	38.49	38.7	39.69	40.11	39.79	40.08	40.08	40.25	39.85
3.58333	39.86	39.46	39.39	39.75	38.5	38.72	39.68	40.11	39.78	40.07	40.07	40.25	39.89
3.6	39.87	39.39	39.41	39.68	38.53	38.77	39.69	40.12	39.75	39.98	40.05	40.17	39.93
3.61667	39.89	39.29	39.41	39.67	38.54	38.79	39.67	40.14	39.73	39.89	40.07	40.11	39.98
3.63333	39.9	39.32	39.41	39.63	38.5	38.83	39.62	40.15	39.72	39.84	40.12	40.04	39.99
3.65	39.86	39.48	39.41	39.58	38.42	38.83	39.58	40.15	39.67	39.83	40.13	40.02	39.94
3.66667	39.77	39.53	39.41	39.54	38.62	38.78	39.58	40.15	39.65	39.81	40.13	40.02	39.91
3.68333	39.72	39.53	39.42	39.56	38.74	38.77	39.64	40.12	39.63	39.78	40.16	40.03	39.93
3.7	39.81	39.39	39.42	39.59	38.73	38.81	39.65	40.11	39.56	39.79	40.17	40.02	39.93
3.71667	39.85	39.32	39.41	39.52	38.72	38.86	39.62	40.14	39.57	39.82	40.12	39.98	39.91
3.73333	39.85	39.31	39.39	39.49	38.76	38.87	39.6	40.14	39.59	39.84	40.12	39.96	39.93
3.75	39.84	39.26	39.4	39.53	38.77	38.93	39.61	40.13	39.59	39.85	40.15	39.98	39.97
3.76667	39.82	39.3	39.41	39.58	38.78	38.91	39.64	40.12	39.61	39.89	40.15	40	40.01
3.78333	39.81	39.36	39.4	39.62	38.78	38.86	39.64	40.14	39.63	39.89	40.17	39.99	40.02
3.8	39.8	39.36	39.4	39.71	38.76	38.86	39.6	40.14	39.64	39.87	40.07	39.97	39.99
3.81667	39.76	39.39	39.4	39.8	38.74	38.86	39.6	40.15	39.65	39.86	40.03	40.01	39.98
3.83333	39.71	39.42	39.41	39.84	38.72	38.88	39.59	40.15	39.71	39.86	40.13	40.06	39.94
3.85	39.81	39.43	39.44	39.91	38.76	38.93	39.56	40.15	39.73	39.89	40.12	40.13	39.84
3.86667	39.83	39.4	39.44	40.04	38.8	38.99	39.56	40.12	39.73	39.9	40.07	40.23	39.8
3.88333	39.86	39.36	39.44	40.08	38.78	39.02	39.53	40.1	39.77	39.9	40.11	40.27	39.9
3.9	39.88	39.38	39.44	40.08	38.64	39.04	39.52	40.1	39.79	39.94	40.13	40.25	39.99
3.91667	39.85	39.42	39.44	40	38.67	39.03	39.54	40.1	39.82	40	40.15	40.17	40.1
3.93333	39.81	39.42	39.44	39.91	38.75	38.99	39.6	40.1	39.82	40.03	40.19	40.1	40.13
3.95	39.72	39.47	39.44	39.89	38.76	38.97	39.66	40.11	39.81	40.04	40.18	40.07	40.16
3.96667	39.64	39.5	39.45	39.85	38.76	39	39.69	40.1	39.79	40.01	40.16	40.05	40.14
3.98333	39.72	39.44	39.45	39.88	38.78	39.03	39.7	40.09	39.75	39.99	40.17	40.07	40.03
4	39.8	39.39	39.45	39.89	38.79	39.02	39.69	40.09	39.75	39.98	40.15	40.09	40
4.01667	39.81	39.38	39.45	39.87	38.79	39.02	39.65	40.08	39.75	39.93	40.13	40.09	40.02
4.03333	39.78	39.4	39.45	39.93	38.78	39.04	39.62	40.07	39.73	39.91	40.08	40.09	40.02
4.05	39.75	39.49	39.46	39.97	38.73	39.09	39.55	40.07	39.73	39.91	40.1	40.09	39.95
4.06667	39.77	39.51	39.48	40	38.65	39.08	39.47	40.06	39.7	39.86	40.16	40.11	39.87
4.08333	39.8	39.47	39.48	40	38.63	39.07	39.34	40.01	39.62	39.87	40.17	40.11	39.87
4.1	39.82	39.45	39.47	39.99	38.61	39.06	39.13	39.95	39.5	39.89	40.13	40.09	39.88
4.11667	39.83	39.42	39.4	39.94	38.58	38.96	38.83	39.9	39.29	39.87	40.08	40.15	39.89
4.13333	39.82	39.37	39.29	39.85	38.51	38.81	38.55	39.81	39.02	39.76	39.98	40.15	39.88
4.15	39.79	39.29	39.09	39.51	38.4	38.55	38.23	39.67	38.69	39.65	39.88	40.09	39.85
4.16667	39.75	39.18	38.9	38.96	38.12	38.46	37.73	39.49	38.32	39.56	39.77	39.98	39.8
4.18333	39.68	39.03	38.67	38.64	37.8	38.41	37.44	39.28	37.92	39.46	39.66	39.85	39.72
4.2	39.6	38.9	38.44	38.41	37.65	38.35	37.13	39.13	37.53	39.34	39.54	39.7	39.63
4.21667	39.5	38.75	38.2	38.12	37.58	38.27	36.85	38.98	37.14	39.22	39.41	39.52	39.52
4.23333	39.38	38.57	37.9	37.71	37.53	38.2	36.64	38.63	36.74	39.09	39.26	39.33	39.4
4.25	39.25	38.36	37.7	37.51	37.47	38.17	36.43	38.52	36.51	38.96	39.12	39.12	39.27
4.26667	39.12	38.17	37.35	37.44	37.35	38.12	36.27	38.46	36.39	38.82	39	38.82	39.13
4.28333	38.99	37.96	37.02	37.38	37.34	38.01	36.16	38.35	36.24	38.67	38.85	38.51	39
4.3	38.85	37.65	36.86	37.27	37.26	37.93	35.99	38.32	36.11	38.51	38.62	38.27	38.86
4.31667	38.65	37.36	36.58	37.19	36.96	37.91	35.65	38.26	36.03	38.35	38.22	38.05	38.71
4.33333	38.25	37	36.63	37.09	36.56	37.89	35.44	38.11	35.93	38.19	37.95	37.83	38.56
4.35	37.96	36.64	36.66	36.77	36.3	37.83	35.3	37.9	35.82	38.02	37.8	37.65	38.4
4.36667	37.74	36.52	36.48	36.37	36.21	37.71	35.18	37.71	35.88	37.88	37.74	37.54	38.23
4.38333	37.59	36.38	36.27	36.03	36.05	37.63	35.33	37.57	35.85	37.71	37.78	37.51	38.08
4.4	37.48	36.22	36.08	35.86	35.95	37.52	35.36	37.44	35.69	37.47	37.76	37.43	37.92
4.41667	37.46	36.07	35.88	35.6	35.84	37.39	35.32	37.25	35.63	37.31	37.64	37.34	37.76
4.43333	37.35	35.88	35.68	35.52	35.78	37.22	35.25	37.14	35.59	37.25	37.5	37.29	37.59
4.45	37.06	35.68	35.55	35.52	35.79	37.03	35.19	37.12	35.52	37.21	37.44	37.09	37.45
4.46667	37.01	35.6	35.37	35.48	35.7	36.98	35.12	37.02	35.44	37.19	37.37	36.86	37.3
4.48333	36.94	35.54	35.28	35.47	35.74	36.93	35.01	36.97	35.33	37.22	37.29	36.86	37.14
4.5	36.66	35.49	35.11	35.5	36.19	36.87	34.95	36.86	35.2	37.26	37.14	36.88	36.98
4.51667	36.37	35.47	35.12	35.48	36.23	36.71	34.89	36.79	35.02	37.26	36.86	36.86	36.64
4.53333	36.17	35.44	35.43	35.33	36.03	36.59	34.77	36.73	34.88	37.23	36.59	36.72	36.12
4.55	36.17	35.45	35.44	35.17	35.75	36.49	34.71	36.66	34.75	37.2	36.39	36.59	35.77
4.56667	36.32	35.4	34.94	35.08	35.53	36.43	34.54	36.58	34.62	37.11	36.27	36.48	35.55
4.58333	36.64	35.05	34.66	35	35.44	36.33	34.37	36.49	34.49	37.07	36.19	36.54	35.48
4.6	36.77	34.94	35.06	34.93	35.55	36.24	34.25	36.41	34.35	37.07	36.1	36.65	35.44
4.61667	36.77	34.9	35.3	34.89	35.55	36.12	34.14	36.32	34.21	37.04	36	36.66	35.4
4.63333	36.74	34.81	35.32	34.83	35.47	35.84	34.02	36.23	34.07	37.03	35.88	36.75	35.39
4.65	36.67	34.75	35.32	34.75	35.36	35.58	33.9	36.15	33.93	37.05	35.76	36.74	35.46
4.66667	36.59	34.74	35.28	34.66	35.25	35.56	33.77	36.06	33.85	37.12	35.64	36.54	35.5
4.68333	36.52	34.72	35.25	34.59	35.05	35.53	33.62	35.95	33.74	37.21	35.53	36.45	35.49
4.7	36.44	34.79	35.2	34.51	34.93	35.44	33.48	35.87	33.72	37.17	35.42	36.49	35.53
4.71667	36.36	34.94	35.15	34.46	34.75	35.52	33.38	35.74	33.81	37.03	35.3	36.57	35.57
4.73333	36.23	35.02	35.05	34.56	34.59	35.56	33.28	35.6	33.79	37.03	35.17	36.58	35.58
4.75	36.11	35.07	34.96	34.53	34.47	35.55	33.2	35.42	33.69	37.07	35.05	36.47	35.55
4.76667	36	35.22	34.86	34.45	34.81	35.51	33.13	35.26	33.59	37.08	34.94	36.37	35.54
4.78333	35.88	35.32	34.68	34.43	34.95	35.42	33.06	35.13	33.49	37.07	34.82	36.38	35.57
4.8	35.63	35.37	34.48	34.38	34.95	35.3	33	34.99	33.39	37.03	34.72	36.29	35.63
4.81667	35.43	35.4	34.32	34.61	34.93	35.25	32.94	34.88	33.31	36.96	34.61	36.24	35.79
4.83333	35.15	35.41	34.2	34.56	34.87	35.2	32.89	34.77	33.24	36.87	34.5	36.16	35.79
4.85	34.82	35.4	34.08	34.23	34.79	35.13	32.81	34.67	33.18	36.84	34.4	36.06	35.63
4.86667	34.7	35.37	33.97	33.9	34.72	35.04	32.74	34.55	33.02	36.81	34.28	36.01	35.59
4.88333	34.65	35.32	33.88	33.98	34.66	34.98	32.68	34.41	32.91	36.79	34.18	35.99	35.59
4.9	34.59	35.28	33.81	34.09	34.6	35.02	32.62	34.25	32.85	36.72	34.08	36.08	35.59
4.91667	34.56	35.26	33.74	34.3	34.53	35.02	32.58	34.22	32.82	36.67	33.98	36.07	35.6
4.93333	34.61	35.28	33.68	34.46	34.4	34.95	32.56	34.22	32.73	36.64	33.88	36.17	35.5
4.95	34.63	35.29	33.61	34.59	34.21	34.87	32.57	34.13	32.72	36.63	33.78	36.22	35.35
4.96667	34.65	35.28	33.53	34.64	34.15	34.79	32.56	34	32.91	36.62	33.69	36.21	35.22
4.98333	34.68	35.26	33.49	34.65	34.08	34.63	32.51	34.12	33.06	36.57	33.61	36.19	35.19
5	34.68	35.27	33.44	34.64	33.95	34.41	32.47	34.2	33.12	36.5	33.53	36.2	35.15
5.01667	34.67	35.42	33.38	34.61	33.81	34.28	32.43	34.28	33.14	36.44	33.46	36.15	35.11
5.03333	34.65	35.45	33.35	34.59	33.64	34.19	32.42	34.41	33.14	36.32	33.4	35.99	35.02
5.05	34.63	35.44	33.32	34.57	33.49	34.04	32.44	34.41	33.15	36.24	33.37	35.86	34.99
5.06667	34.63	35.4	33.3	34.55	33.38	33.98	32.43	34.39	33.18	36.07	33.24	35.61	34.92
5.08333	34.63	35.35	33.3	34.52	33.27	33.9	32.39	34.37	33.2	35.97	33.06	35.6	34.86
5.1	34.63	35.31	33.3	34.51	33.22	33.8	32.33	34.34	33.2	35.86	33.06	35.62	34.79
5.11667	34.61	35.27	33.3	34.51	33.27	33.65	32.3	34.32	33.18	35.77	33.09	36.06	34.74
5.13333	34.4	35.22	33.3	34.51	33.16	33.59	32.28	34.29	33.15	35.67	33.14	36.12	34.73
5.15	34.27	35.16	33.3	34.51	32.8	33.54	32.24	34.26	33.11	35.59	33.49	35.93	34.78
5.16667	34.21	35.13	33.31	34.51	32.96	33.49	32.09	34.23	33.1	35.5	33.79	35.65	34.84
5.18333	34.18	35.06	33.32	34.52	33.07	33.41	32.05	34.21	33.08	35.38	33.81	35.61	34.9
5.2	34.21	35	33.38	34.51	33.07	33.34	32.04	34.17	33.04	35.28	33.82	35.6	34.84
5.21667	34.23	34.93	33.38	34.49	33.05	33.3	32.09	34.12	33.05	35.24	33.83	35.68	34.65
5.23333	34.22	34.89	33.26	34.48	33.07	33.24	32.23	34.07	33.05	35.18	33.84	35.82	34.57
5.25	34.2	34.84	33.19	34.52	33.05	33.2	32.35	34.02	33.03	35.07	33.83	35.83	34.51
5.26667	34.1	34.79	33.26	34.55	32.98	33.16	32.46	34	32.99	34.98	33.82	35.81	34.39
5.28333	34.02	34.74	33.46	34.58	32.96	33.14	32.56	33.99	32.95	34.93	33.8	35.71	34.38
5.3	34.01	34.69	33.64	34.6	32.9	33.19	32.71	33.97	32.93	34.88	33.79	35.78	34.51
5.31667	34.02	34.64	33.64	34.61	32.75	33.3	32.83	33.94	32.9	34.82	33.77	35.87	34.76
5.33333	34.03	34.62	33.72	34.62	32.59	33.38	32.89	33.92	32.86	34.78	33.76	35.97	35.03
5.35	34.08	34.58	33.77	34.65	32.41	33.43	32.93	33.9	32.83	34.75	33.73	35.96	35.05
5.36667	34.09	34.36	33.79	34.67	32.16	33.43	33.01	33.87	32.82	34.68	33.69	35.94	34.98
5.38333	34.08	34.03	33.79	34.69	32.11	33.48	33.05	33.85	32.82	34.6	33.68	35.9	34.98
5.4	34.07	34.13	33.79	34.7	32.16	33.47	33.06	33.83	32.8	34.58	33.66	35.81	34.92
5.41667	34.07	34.17	33.79	34.71	32.19	33.32	33.06	33.79	32.76	34.56	33.65	35.79	35
5.43333	34.1	34.12	33.76	34.73	32.18	33.4	33.06	33.72	32.75	34.58	33.64	35.76	34.99
5.45	34.13	34.14	33.7	34.74	32.13	33.58	33.06	33.7	32.75	34.67	33.64	35.71	34.94
5.46667	33.94	34.33	33.67	34.74	32.18	33.72	33.06	33.68	32.72	34.7	33.64	35.63	34.91
5.48333	33.71	34.53	33.68	34.73	32.18	33.79	33.05	33.68	32.69	34.71	33.64	35.57	34.79
5.5	33.7	34.6	33.65	34.73	32.2	33.85	33.04	33.67	32.66	34.73	33.64	35.51	34.82
5.51667	33.72	34.62	33.6	34.73	32.26	33.85	33.03	33.66	32.62	34.75	33.64	35.48	35
5.53333	33.85	34.62	33.55	34.72	32.13	33.77	33.03	33.65	32.59	34.75	33.64	35.46	35.12
5.55	33.97	34.6	33.49	34.73	32.06	33.7	33.01	33.65	32.59	34.79	33.63	35.44	35.14
5.56667	33.96	34.56	33.44	34.74	32.05	33.66	33	33.64	32.58	34.8	33.62	35.44	35.12
5.58333	33.69	34.52	33.44	34.74	32.02	33.62	33.01	33.6	32.53	34.65	33.6	35.43	35.08
5.6	33.42	34.48	33.43	34.73	31.98	33.55	33.08	33.47	32.54	34.45	33.58	35.41	35.01
5.61667	33.45	34.44	33.52	34.72	31.95	33.51	33.1	33.36	32.56	34.44	33.55	35.39	34.96
5.63333	33.51	34.41	33.6	34.71	31.91	33.45	33.1	33.35	32.57	34.43	33.5	35.38	34.92
5.65	33.75	34.39	33.62	34.71	31.86	33.39	33.11	33.37	32.58	34.4	33.49	35.31	34.83
5.66667	34.17	34.42	33.61	34.73	31.76	33.36	33.1	33.4	32.6	34.33	33.49	35.16	34.83
5.68333	34.64	34.43	33.56	34.74	31.62	33.32	33.06	33.46	32.64	34.24	33.49	35.15	34.84
5.7	34.6	34.43	33.51	34.75	31.52	33.28	33.05	33.51	32.65	34.15	33.5	35.19	34.82
5.71667	34.31	34.41	33.48	34.75	31.36	33.26	33.05	33.55	32.68	34.17	33.51	35.29	34.77
5.73333	34.12	34.41	33.48	34.76	31.32	33.23	33.04	33.59	32.71	34.14	33.53	35.34	34.68
5.75	34.01	34.4	33.48	34.77	31.31	33.18	33.03	33.63	32.64	34.11	33.57	35.36	34.65
5.76667	33.93	34.33	33.48	34.77	31.31	33.16	33.01	33.66	32.53	34.08	33.57	35.41	34.62
5.78333	33.9	34.29	33.49	34.78	31.31	33.18	32.99	33.66	32.53	34.01	33.47	35.42	34.6
5.8	33.87	34.29	33.52	34.78	31.33	33.18	32.97	33.67	32.48	33.95	33.3	35.44	34.58
5.81667	33.82	34.28	33.56	34.77	31.37	33.19	32.95	33.68	32.42	33.92	33.26	35.62	34.76
5.83333	33.81	34.27	33.67	34.77	31.39	33.18	32.94	33.69	32.41	33.9	33.16	35.69	34.81
5.85	33.81	34.26	33.72	34.77	31.4	33.16	32.95	33.72	32.41	33.88	33.2	35.69	34.81
5.86667	33.83	34.25	33.87	34.69	31.41	33.14	32.96	33.74	32.41	33.86	33.32	35.68	34.78
5.88333	33.87	34.25	33.94	34.52	31.42	33.15	32.96	33.82	32.51	33.83	33.37	35.72	34.76
5.9	33.92	34.32	33.96	34.39	31.41	33.15	32.97	33.83	32.55	33.8	33.52	35.77	34.73
5.91667	33.96	34.38	33.96	34.42	31.35	33.13	32.97	33.81	32.57	33.75	33.84	35.78	34.71
5.93333	33.98	34.38	33.94	34.26	31.33	33.12	32.97	33.79	32.54	33.69	34.09	35.78	34.7
5.95	34.05	34.33	33.87	33.97	31.3	33.11	32.98	33.78	32.49	33.65	34.13	35.76	34.69
5.96667	34.2	34.27	33.7	33.92	31.19	33.23	32.99	33.78	32.46	33.64	34.14	35.73	34.69
5.98333	34.27	34.2	33.55	34.43	31.36	33.25	33	33.73	32.44	33.64	34.14	35.7	34.71
6	34.26	34.16	33.46	34.61	31.88	33.25	33.01	33.7	32.46	33.61	34.14	35.67	34.7
6.01667	34.22	34.14	33.4	34.62	32.03	33.31	32.99	33.72	32.53	33.59	34.15	35.64	34.68
6.03333	34.17	34.12	33.39	34.64	32.02	33.34	32.9	33.72	32.53	33.58	34.16	35.6	34.67
6.05	34.14	34.13	33.39	34.72	32.04	33.36	32.88	33.69	32.53	33.59	34.14	35.58	34.67
6.06667	34.12	34.14	33.39	34.74	32.09	33.38	32.87	33.62	32.53	33.58	34.1	35.55	34.69
6.08333	34.11	34.13	33.39	34.7	32.23	33.39	32.84	33.62	32.52	33.56	34.09	35.54	34.75
6.1	34.1	34.13	33.39	34.66	32.67	33.36	32.81	33.49	32.52	33.43	34.09	35.51	34.75
6.11667	34.1	34.14	33.39	34.66	33.07	33.36	32.78	33.37	32.52	33.36	34.08	35.49	34.72
6.13333	34.06	34.21	33.41	34.66	33.41	33.42	32.74	33.42	32.63	33.3	34.08	35.44	34.68
6.15	33.99	34.27	33.46	34.63	33.56	33.43	32.6	33.91	32.87	33.25	34.07	35.34	34.66
6.16667	33.96	34.32	33.46	34.58	33.59	33.4	32.51	34.13	32.96	33.15	34.07	35.33	34.63
6.18333	33.96	34.37	33.42	34.52	33.59	33.37	32.49	34.27	33	33.08	34.08	35.36	34.6
6.2	33.96	34.41	33.4	34.47	33.57	33.33	32.48	34.32	33.05	32.98	34.07	35.38	34.57
6.21667	33.95	34.44	33.46	34.43	33.57	33.23	32.47	34.37	33.14	32.88	34.09	35.52	34.55
6.23333	33.95	34.45	33.48	34.42	33.57	33.2	32.51	34.38	33.25	32.82	34.17	35.59	34.54
6.25	33.95	34.45	33.55	34.38	33.58	33.22	32.49	34.38	33.34	32.82	34.25	35.66	34.56
6.26667	34.05	34.45	33.62	34.38	33.61	33.25	32.38	34.41	33.37	32.84	34.28	35.73	34.68
6.28333	34.11	34.44	33.64	34.38	33.63	33.21	32.45	34.45	33.37	32.85	34.28	35.75	34.59
6.3	34.18	34.41	33.6	34.38	33.66	33.15	32.56	34.46	33.38	32.86	34.29	35.64	34.28
6.31667	34.19	34.41	33.52	34.36	33.64	33.15	32.54	34.46	33.39	32.86	34.3	35.48	34.17
6.33333	34.18	34.43	33.5	34.39	33.55	33.15	32.73	34.45	33.41	32.86	34.3	35.53	34.46
6.35	34.18	34.44	33.5	34.51	33.55	33.16	32.8	34.44	33.35	32.88	34.31	35.62	34.65
6.36667	34.18	34.44	33.53	34.63	33.55	33.18	32.78	34.43	33.27	32.88	34.31	35.61	34.62
6.38333	34.18	34.44	33.75	34.67	33.54	33.19	32.72	34.43	33.37	32.89	34.29	35.75	34.55
6.4	34.2	34.45	33.85	34.63	33.53	33.21	32.75	34.43	33.47	32.89	34.23	35.84	34.64
6.41667	34.22	34.45	33.89	34.76	33.52	33.24	32.78	34.42	33.58	32.89	34.16	35.86	35.01
6.43333	34.21	34.47	33.91	34.88	33.51	33.28	32.77	34.4	33.66	32.88	34.12	35.83	35.03
6.45	34.06	34.48	33.95	34.93	33.51	33.3	32.77	34.39	33.65	32.88	34.04	35.78	35.02
6.46667	33.98	34.48	33.98	34.93	33.47	33.29	32.77	34.37	33.6	32.87	34.01	35.69	35.05
6.48333	33.92	34.49	34.02	34.92	33.46	33.29	32.76	34.34	33.55	32.81	33.92	35.51	35.03
6.5	33.92	34.49	34.06	34.92	33.46	33.33	32.74	34.34	33.64	32.75	33.49	35.27	35
6.51667	33.93	34.49	34.1	34.94	33.59	33.33	32.74	34.34	33.72	32.84	33.3	35.23	34.98
6.53333	33.93	34.49	34.11	34.95	33.62	33.37	32.73	34.33	33.74	32.96	33.36	35.25	34.93
6.55	33.93	34.49	34.12	34.95	33.61	33.62	32.74	34.33	33.73	33.08	33.34	35.2	34.87
6.56667	33.94	34.49	34.13	34.91	33.56	33.63	32.75	34.33	33.73	33.17	33.39	35.12	34.84
6.58333	33.96	34.48	34.15	34.87	33.59	33.66	32.75	34.34	33.82	33.23	33.72	35.3	34.79
6.6	33.98	34.46	34.16	34.85	33.65	33.74	32.79	34.37	33.88	33.29	34.08	35.36	34.75
6.61667	33.98	34.43	34.19	34.85	33.68	33.85	32.83	34.39	33.89	33.36	34.16	35.21	34.7
6.63333	33.99	34.39	34.22	34.83	33.7	33.94	32.83	34.39	33.81	33.41	34.14	35.25	34.68
6.65	34	34.37	34.25	34.83	33.66	34.05	32.83	34.39	33.77	33.43	34.15	35.45	34.69
6.66667	34	34.32	34.25	34.84	33.58	34.12	32.87	34.4	33.7	33.43	34.12	35.54	34.69
6.68333	34	34.27	34.25	34.82	33.42	34.14	33.2	34.43	33.64	33.41	33.95	35.54	34.67
6.7	34	34.22	34.25	34.78	33.31	34.18	33.35	34.46	33.61	33.36	34.08	35.51	34.66
6.71667	34.02	34.2	34.25	34.75	33.28	34.2	33.28	34.45	33.6	33.31	34.37	35.48	34.65
6.73333	34.03	34.17	34.25	34.72	33.23	34.22	33.13	34.41	33.6	33.26	34.78	35.46	34.64
6.75	34.03	34.16	34.26	34.69	33.25	34.22	33.19	34.35	33.58	33.21	34.95	35.42	34.62
6.76667	34.04	34.16	34.28	34.77	33.26	34.2	33.28	34.29	33.58	33.17	34.99	35.44	34.62
6.78333	34.09	34.15	34.3	34.95	33.24	34.2	33.31	34.25	33.66	33.18	34.97	35.46	34.65
6.8	34.24	34.11	34.39	35.02	33.1	34.18	33.26	34.21	33.67	33.24	35	35.45	34.68
6.81667	34.29	34.08	34.4	35.05	32.94	34.17	33.23	34.17	33.67	33.28	35.02	35.38	34.69
6.83333	34.33	34.06	34.38	35.06	32.92	34.17	33.24	34.09	33.67	33.28	34.8	35.36	34.7
6.85	34.32	34.08	34.34	35.06	32.98	34.17	33.27	34.05	33.68	33.3	34.73	35.34	34.71
6.86667	34.29	34.13	34.31	35.07	33.04	34.17	33.28	34.05	33.83	33.36	34.67	35.33	34.68
6.88333	34.24	34.15	34.31	35.06	33.05	34.09	33.27	34.05	33.93	33.37	34.58	35.31	34.65
6.9	34.22	34.17	34.3	34.95	33.03	34	33.27	34.05	33.97	33.34	34.49	35.26	34.67
6.91667	34.2	34.2	34.21	34.93	33.01	34.1	33.32	34.02	33.96	33.3	34.36	35.12	34.71
6.93333	34.11	34.21	34.2	34.9	33	34.19	33.41	34.01	34.02	33.29	34.25	35.11	34.76
6.95	34.06	34.21	34.26	34.7	33.1	34.24	33.42	34.02	34.04	33.27	34.13	35.19	34.81
6.96667	34.04	34.22	34.36	34.89	33.43	34.11	33.4	34.03	34.04	33.23	34.03	35.22	34.91
6.98333	34.03	34.23	34.35	35.16	33.73	33.89	33.4	34.03	33.99	33.17	33.94	35.2	34.94
7	33.98	34.24	34.24	35.24	33.55	33.97	33.37	33.94	33.96	33.09	33.87	35.16	34.93
7.01667	33.87	34.27	34.14	35.09	33.52	33.9	33.35	33.96	34.07	32.99	33.8	35.12	34.92
7.03333	33.91	34.31	34.14	34.91	33.77	34.17	33.34	34.1	34.13	32.95	33.77	35.09	34.92
7.05	33.97	34.34	34.13	34.9	34.07	34.2	33.32	34.07	34.12	32.97	33.73	35.03	34.91
7.06667	34.03	34.37	34.14	34.95	34.42	33.98	33.32	33.92	34.06	32.99	33.7	34.96	34.91
7.08333	34.07	34.4	34.22	35.14	34.7	33.85	33.34	34.01	33.99	33.02	33.68	34.91	34.91
7.1	34.1	34.41	34.44	35.21	34.8	33.9	33.31	34.15	33.98	33.03	33.64	34.79	34.92
7.11667	34.12	34.38	34.56	35.19	34.83	34.02	33.25	34.65	33.97	33.01	33.63	34.69	34.93
7.13333	34.14	34.34	34.56	35.16	35.07	34.08	33.23	35	33.85	33.02	33.63	34.58	34.94
7.15	34.15	34.31	34.62	35.38	35.35	34.32	33.21	35.14	33.77	33.05	33.61	34.28	34.97
7.16667	34.17	34.3	34.67	35.58	35.52	34.53	33.21	35.21	33.84	33.08	33.56	34.26	35.04
7.18333	34.22	34.27	34.76	35.53	35.68	34.57	33.21	35.24	33.85	33.13	33.52	34.38	35.05
7.2	34.22	34.3	34.79	35.42	35.74	34.56	33.27	35.26	33.87	33.19	33.5	34.6	35.03
7.21667	34.22	34.46	34.78	35.47	35.76	34.53	33.52	35.26	34.11	33.21	33.49	34.81	35.06
7.23333	34.21	34.5	34.68	35.73	35.8	34.53	33.67	35.32	34.19	33.22	33.47	34.94	35.07
7.25	34.21	34.52	34.54	35.73	35.95	34.57	33.72	35.34	34.21	33.22	33.49	35.06	35.07
7.26667	34.22	34.53	34.46	35.72	35.9	34.57	33.74	35.34	34.2	33.18	33.56	35.2	35.12
7.28333	34.22	34.54	34.4	35.93	35.53	34.52	33.74	35.35	34.17	33.13	33.62	35.27	35.12
7.3	34.22	34.54	34.39	35.89	35.51	34.45	33.74	35.34	34.12	33.08	33.75	35.55	35
7.31667	34.21	34.53	34.37	35.76	35.6	34.39	33.75	35.32	33.89	33.02	33.88	35.66	34.96
7.33333	34.22	34.52	34.36	35.88	35.7	34.52	33.73	35.32	33.86	32.94	34.04	35.66	35.07
7.35	34.23	34.49	34.36	35.86	35.65	34.61	33.63	35.39	33.86	32.89	34.15	35.61	35.12
7.36667	34.21	34.44	34.36	35.94	35.56	34.6	33.55	35.43	33.91	32.89	34.23	35.61	35.11
7.38333	34.2	34.41	34.33	36.18	35.84	34.57	33.51	35.49	33.91	32.91	34.26	35.63	35.05
7.4	34.18	34.4	34.31	36.18	35.99	34.5	33.49	35.52	33.84	32.96	34.25	35.64	35.14
7.41667	34.16	34.39	34.27	35.82	36.06	34.46	33.5	35.52	33.79	33	34.23	35.62	35.14
7.43333	34.11	34.39	34.23	35.37	36.11	34.44	33.51	35.52	33.72	33.02	34.18	35.59	35.16
7.45	34.07	34.42	34.2	35.25	35.99	34.63	33.59	35.5	33.87	33.04	34.1	35.55	35.21
7.46667	34.04	34.45	34.2	35.59	35.93	34.79	33.6	35.43	33.97	33.1	34.1	35.51	35.31
7.48333	34	34.49	34.2	36.08	35.91	34.86	33.59	35.41	33.98	33.11	34.23	35.41	35.58
7.5	33.97	34.53	34.2	36.5	35.87	34.9	33.59	35.4	33.96	33.1	34.29	35.26	35.72
7.51667	33.88	34.55	34.2	36.53	35.78	35.01	33.58	35.4	34.02	33.14	34.32	35.25	35.77
7.53333	33.7	34.57	34.2	36.48	35.72	35.06	33.51	35.41	34.15	33.18	34.33	35.27	35.59
7.55	33.63	34.6	34.2	36.42	35.69	35.12	33.49	35.43	34.18	33.23	34.35	35.26	35.61
7.56667	33.64	34.63	34.21	36.37	35.65	35.5	33.51	35.43	34.17	33.24	34.37	35.27	35.62
7.58333	33.89	34.65	34.21	36.36	35.61	35.43	33.6	35.29	34.19	33.27	34.39	35.32	35.59
7.6	34.1	34.67	34.21	36.35	35.58	34.94	33.64	35.03	34.23	33.3	34.43	35.3	36.04
7.61667	34.38	34.68	34.22	36.32	35.56	34.73	33.57	35.18	34.24	33.36	34.46	35.19	35.99
7.63333	34.36	34.65	34.36	36.24	35.55	34.68	33.53	35.28	34.17	33.53	34.47	35.14	35.64
7.65	34.11	34.51	34.42	36.15	35.5	34.67	33.58	35.37	34.06	33.66	34.47	35.15	35.44
7.66667	33.94	34.47	34.34	36.02	35.46	34.71	33.61	35.46	33.97	33.81	34.39	35.38	35.4
7.68333	33.89	34.48	34.24	35.85	35.43	35.22	33.64	35.52	33.95	33.91	33.94	35.45	35.63
7.7	34.16	34.48	34.33	35.82	35.41	35.36	33.67	35.53	33.91	33.99	33.93	35.48	35.81
7.71667	34.34	34.47	34.43	35.79	35.41	35.49	33.71	35.55	33.81	34.03	33.99	35.6	35.84
7.73333	34.33	34.45	34.57	35.78	35.37	35.49	33.72	35.52	33.81	34.07	34.13	35.57	35.87
7.75	34.39	34.44	34.6	35.71	35.33	35.46	33.71	35.29	34	34.26	34.18	35.51	35.83
7.76667	34.57	34.41	34.6	35.63	35.31	35.32	33.68	35.01	34.09	34.27	34.17	35.63	35.87
7.78333	34.62	34.45	34.67	35.65	35.37	35.25	33.66	35.05	34.14	34.09	34.31	35.53	36.42
7.8	34.63	34.57	34.9	35.69	35.49	35.55	33.64	35.01	34.2	34.06	34.58	35.42	36.49
7.81667	34.88	34.59	34.93	35.69	35.55	35.64	33.64	34.73	34.28	34.01	34.7	35.63	36.4
7.83333	34.95	34.45	34.93	35.72	35.6	35.53	33.68	34.78	34.32	33.87	34.96	35.67	36.47
7.85	35.11	34.27	34.93	35.73	35.65	35.45	33.73	35.49	34.3	33.86	35.14	35.82	36.26
7.86667	35.26	34.27	34.93	35.73	35.61	35.37	33.72	35.72	34.15	33.87	35.15	35.9	36.02
7.88333	35.2	34.47	34.93	35.75	35.55	35.09	33.45	35.9	34.12	33.85	35.07	35.98	35.95
7.9	35.03	34.51	34.95	36	35.52	35.14	33.31	36.04	34.22	33.8	35	36	35.99
7.91667	35.25	34.47	34.91	36.01	35.43	35.31	33.43	36.09	34.43	33.73	34.95	35.99	36
7.93333	35.55	34.54	34.75	35.88	35.48	35.37	33.67	36.05	34.67	33.78	34.81	35.94	35.95
7.95	35.58	34.74	34.65	35.85	35.65	35.42	33.73	36.19	34.75	33.81	34.72	35.97	35.88
7.96667	35.55	34.87	34.88	35.85	35.66	35.46	33.81	36.22	34.75	33.8	34.73	36	35.84
7.98333	35.54	34.98	34.98	35.86	35.65	35.56	34.19	36.15	34.77	33.75	34.79	35.96	35.84
8	35.38	34.99	34.89	35.96	35.78	35.66	34.4	36.04	34.77	33.75	34.84	35.91	35.86
8.01667	35.12	34.95	34.73	36.06	35.9	35.72	34.52	35.92	34.89	33.77	34.93	35.86	35.89
8.03333	34.78	34.95	35.21	36.1	35.96	35.74	34.69	35.9	34.88	33.82	34.98	35.8	35.87
8.05	34.71	35.08	35.36	36.15	36.11	35.73	34.72	35.89	34.56	33.93	34.96	35.73	35.81
8.06667	34.73	35.27	35.49	36.15	36.19	35.69	34.67	35.89	34.36	33.96	34.9	35.68	35.77
8.08333	34.77	35.3	35.91	36.13	36.19	35.67	34.78	36.04	34.39	33.97	34.83	35.62	35.78
8.1	34.88	35.26	36.08	36.13	36.1	35.63	34.98	36.19	34.39	33.97	34.68	35.53	35.77
8.11667	34.69	35.06	36.13	36.13	36.14	35.57	34.96	36.34	34.37	33.97	34.55	35.51	35.75
8.13333	34.82	34.99	36.13	36.13	36.32	35.51	34.72	36.41	34.63	33.97	34.53	35.51	35.58
8.15	35.04	35.03	36.15	36.03	36.49	35.45	34.6	36.42	35	34.02	34.56	35.5	35.36
8.16667	35.17	35.03	36.22	36.02	36.57	35.63	34.54	36.39	35.06	34.21	34.71	35.52	35.22
8.18333	35.32	34.96	36.26	36.13	36.73	35.91	34.31	36.29	35.1	34.47	34.75	35.5	35.14
8.2	35.42	34.94	36.26	36.22	36.87	35.91	34.48	36.16	35.18	34.68	34.74	35.45	35.12
8.21667	35.48	34.89	36.26	36.26	37.06	35.9	34.68	36.04	35.19	34.9	34.75	35.46	35.14
8.23333	35.49	34.79	36.26	36.25	37.09	35.9	34.76	35.94	35.23	35.15	34.76	35.49	35.26
8.25	35.49	34.89	36.24	36.05	36.98	35.89	34.87	35.83	35.33	35.26	34.77	35.51	35.75
8.26667	35.45	34.93	36.2	36	36.83	35.96	35.09	35.74	35.37	35.51	34.75	35.51	36.04
8.28333	35.41	35.14	36.17	36.13	36.76	35.96	35.1	35.66	35.38	35.59	34.64	35.51	36.11
8.3	35.35	35.44	36.13	36	36.84	35.91	35.05	35.56	35.38	35.51	34.6	35.5	36.11
8.31667	35.34	35.44	36.11	36.14	36.9	35.81	35	35.46	35.38	35.46	34.57	35.47	36.11
8.33333	35.33	35.39	36.09	36.43	36.98	35.63	34.96	35.39	35.38	35.44	34.53	35.56	36.06
8.35	35.28	35.51	36.07	36.48	37.12	35.55	34.91	35.4	35.37	35.5	34.52	35.57	36.05
8.36667	35.23	35.56	36.03	36.39	37.16	35.53	34.87	35.56	35.34	35.55	34.53	35.42	35.9
8.38333	35.17	35.59	35.95	36.31	37.18	35.52	34.82	35.62	35.3	35.55	34.56	35.31	35.78
8.4	34.96	35.59	35.93	36.24	37.2	35.66	34.79	35.76	35.29	35.55	34.6	35.36	35.84
8.41667	34.82	35.58	35.93	36.33	37.25	35.99	34.74	35.85	35.23	35.63	34.64	35.43	35.86
8.43333	34.78	35.55	35.94	36.41	37.3	36.16	34.62	35.88	35.19	35.68	34.62	35.45	35.79
8.45	34.59	35.51	35.97	36.42	37.31	36.18	34.57	36	35.18	35.82	34.59	35.61	35.7
8.46667	34.51	35.46	35.98	36.48	37.3	36.29	34.55	36.09	35.18	35.86	34.69	35.69	35.6
8.48333	34.54	35.4	35.98	36.53	37.19	36.38	34.58	36.06	35.25	35.82	34.79	35.72	35.64
8.5	34.57	35.35	36	36.38	37.11	36.48	34.59	35.94	35.38	35.74	34.89	35.78	35.9
8.51667	34.58	35.28	36.02	36.26	37.1	36.53	34.61	35.93	35.49	35.68	34.92	35.85	36.56
8.53333	34.58	35.18	36.04	36.09	37.1	36.56	34.61	35.96	35.51	35.62	34.92	35.85	36.57
8.55	34.58	35.07	36.24	36.14	37.09	36.63	34.62	35.97	35.39	35.54	34.88	35.79	36.31
8.56667	34.57	35.03	36.31	36.21	37.08	36.69	34.62	36.01	35.23	35.59	34.6	35.68	36.23
8.58333	34.56	35.05	36.34	36.39	36.97	36.71	34.61	36.08	35.25	35.73	34.24	35.44	36.56
8.6	34.56	35.07	36.29	36.5	36.89	36.65	34.59	36.07	35.37	35.89	34.01	35.42	37.14
8.61667	34.54	35.11	36.13	36.39	36.9	36.82	34.57	35.99	35.47	36.08	33.9	35.43	37.45
8.63333	34.5	35.12	36.1	36.35	36.8	36.89	34.55	35.95	35.86	36.1	33.99	35.39	37.46
8.65	34.45	35.1	36.31	36.42	36.68	36.9	34.53	35.97	36.04	36.26	34.34	35.3	37.23
8.66667	34.41	35.09	36.41	36.73	36.61	36.9	34.5	35.97	36.13	36.27	34.39	35.24	37.28
8.68333	34.41	35.14	36.44	36.8	36.68	36.9	34.47	35.98	36.14	36.2	34.3	35.45	37.32
8.7	34.44	35.23	36.46	36.63	36.75	36.82	34.46	35.97	36.08	36.19	34.39	36	36.97
8.71667	34.47	35.24	36.5	36.69	36.81	36.75	34.45	35.98	36.03	36.17	34.4	36.09	36.24
8.73333	34.49	35.24	36.52	36.75	36.94	36.75	34.43	35.96	35.98	36.16	34.33	36.03	36.06
8.75	34.47	35.24	36.49	36.64	36.92	36.75	34.43	35.97	35.89	36.16	34.69	36.06	36.12
8.76667	34.41	35.24	36.35	36.63	36.72	36.66	34.46	36.08	35.81	36.23	35.01	36.3	36.18
8.78333	34.41	35.21	36.47	36.99	36.58	36.41	34.57	36.16	35.73	36.41	34.93	36.39	36.18
8.8	34.45	35.17	36.58	37.03	36.53	36.13	34.61	36.16	35.7	36.58	34.69	36.39	36.54
8.81667	34.48	35.13	36.67	36.93	36.37	36.02	34.61	36.18	35.6	36.69	34.77	36.37	37.11
8.83333	34.49	35.15	36.69	36.81	36.14	36.2	34.6	36.17	35.53	36.68	35.03	36.36	37.38
8.85	34.5	35.2	36.67	36.64	36.4	36.43	34.6	36.12	35.6	36.57	35.2	36.36	37.5
8.86667	34.5	35.21	36.77	36.6	36.48	36.72	34.6	36.12	35.68	36.53	35.3	36.37	37.31
8.88333	34.52	35.19	36.87	36.78	36.5	36.83	34.57	36.13	35.58	36.5	35.4	36.36	36.57
8.9	34.53	35.19	36.89	36.83	36.8	36.99	34.55	36.15	35.54	36.48	35.5	36.2	36.42
8.91667	34.52	35.16	36.9	36.83	36.91	37.12	34.51	36.31	35.51	36.42	35.51	35.86	36.35
8.93333	34.51	35.11	36.9	36.87	37.02	37.18	34.45	36.43	35.45	36.36	35.35	35.63	36.25
8.95	34.5	35.08	36.92	36.87	37.09	37.1	34.42	36.45	35.52	36.34	35.24	35.71	36.12
8.96667	34.46	35.04	36.98	36.87	37.03	37	34.38	36.35	35.5	36.33	35.31	35.88	36.14
8.98333	34.44	35.01	36.98	36.88	37.3	37	34.37	36.19	35.51	36.4	35.35	36.04	36.16
9	34.42	35.04	36.96	36.88	37.34	36.94	34.37	36.18	35.62	36.44	35.58	36.13	36.19
9.01667	34.36	35.09	36.92	36.87	37.18	36.87	34.4	36.29	35.67	36.57	36.05	36.34	36.25
9.03333	34.37	35.12	36.88	36.83	37.11	36.88	34.46	36.36	35.69	36.71	36.05	36.45	36.43
9.05	34.57	35.11	36.84	36.82	37.12	36.93	34.45	36.38	35.7	37.05	35.87	36.45	36.5
9.06667	34.68	35.06	36.82	36.83	37.15	36.92	34.41	36.38	35.7	37.24	35.77	36.51	36.52
9.08333	34.74	35.06	36.79	36.83	37.05	36.85	34.37	36.33	35.71	37.35	35.78	36.46	37.05
9.1	34.75	35.04	36.72	36.83	36.9	37.01	34.34	36.19	35.8	37.38	35.93	36.2	37.3
9.11667	34.73	35.05	36.68	36.82	36.76	37.13	34.32	36.11	35.93	37.39	36.09	35.88	37.4
9.13333	34.62	35.05	36.57	36.82	36.58	37.35	34.29	36.04	35.8	37.34	36.15	36	37.32
9.15	34.48	35.04	36.53	36.77	36.6	37.44	34.27	35.99	35.61	37.26	36.09	36.3	36.94
9.16667	34.46	35	36.51	36.29	37.08	37.4	34.24	35.97	35.93	37.22	36.07	36.54	36.9
9.18333	34.46	34.99	36.49	35.96	37.24	37.27	34.28	35.99	36.09	37.25	36.08	36.79	36.79
9.2	34.45	35.02	36.48	35.81	37.26	37.25	34.29	36.1	36.12	37.26	35.98	36.97	36.76
9.21667	34.41	35.08	36.48	35.76	37.22	37.22	34.28	36.21	36.42	37.23	35.66	37.08	36.8
9.23333	34.34	35.1	36.52	35.8	37.15	37.17	34.27	36.25	36.85	37.22	35.21	37.15	36.93
9.25	34.3	35.09	36.73	36.19	37.23	37.09	34.27	36.31	36.95	37.19	35.1	37.06	37.11
9.26667	34.38	35.11	36.85	36.39	37.26	37.06	34.27	36.48	36.99	37.21	35.13	36.67	37.22
9.28333	34.61	35.13	36.93	36.23	37.26	36.97	34.3	36.58	37	37.39	35.26	36.5	37.31
9.3	34.5	35.13	37	36.08	37.14	36.96	34.3	36.64	36.99	37.67	35.39	36.34	37.16
9.31667	34.33	35.11	37.05	36.27	36.83	37.03	34.29	36.69	36.94	37.81	35.39	36.36	36.54
9.33333	34.34	35.11	37.06	36.23	36.76	37.03	34.29	36.7	36.84	37.83	35.31	36.42	36.27
9.35	34.69	35.12	37.05	36.1	36.81	37.01	34.29	36.68	36.63	37.78	35.31	36.41	36.27
9.36667	34.94	35.1	37	36.09	36.77	37.04	34.27	36.7	36.39	37.69	35.3	36.57	36.22
9.38333	34.73	35.06	36.81	36.04	36.72	37.02	34.23	36.78	36.35	37.65	35.5	36.76	36.22
9.4	34.31	35.08	36.58	36.19	36.68	36.81	34.21	36.81	36.32	37.65	35.86	36.93	36.26
9.41667	34.29	35.08	36.41	36.32	36.63	36.72	34.2	36.83	36.26	37.58	35.95	37.02	36.38
9.43333	34.33	35.08	36.34	36.56	36.74	36.71	34.19	36.82	36.22	37.4	35.89	36.96	36.45
9.45	34.45	35.09	36.32	36.49	36.77	36.83	34.19	36.79	36.16	37.24	35.56	36.79	36.5
9.46667	35.01	34.99	36.32	36.32	36.79	36.85	34.18	36.79	36.22	37.06	35.21	36.79	36.58
9.48333	35	34.71	36.38	36.15	36.78	36.83	34.15	36.79	36.3	37.01	35.45	36.8	36.72
9.5	34.69	34.6	36.55	36.16	36.72	36.76	34.12	36.78	36.3	36.97	35.71	36.78	36.86
9.51667	34.56	34.6	36.58	36.26	36.76	36.77	34.1	36.75	36.35	36.98	35.93	36.85	36.9
9.53333	34.65	34.58	36.58	36.38	36.89	36.81	34.1	36.77	36.41	37.07	36.01	37.15	36.99
9.55	34.88	34.46	36.57	36.58	36.98	36.83	34.1	36.78	36.44	37.2	35.97	37.17	37.37
9.56667	35.15	34.26	36.6	36.68	37	36.87	34.11	36.76	36.45	37.42	35.72	37.06	37.36
9.58333	35.2	34.25	36.62	36.71	36.94	36.99	34.11	36.72	36.43	37.68	35.69	36.97	36.76
9.6	35.07	34.17	36.63	36.7	36.91	37.09	34.1	36.7	36.3	37.72	35.63	36.99	36
9.61667	35.02	34.2	36.68	36.78	37.16	37.15	34.1	36.67	36.24	37.69	35.71	36.85	35.94
9.63333	35	34.41	36.72	36.77	37.15	37.14	34.1	36.65	36.09	37.64	35.68	36.81	36.01
9.65	34.97	34.45	36.73	36.51	37.18	37	34.1	36.65	35.94	37.69	35.41	36.85	36.4
9.66667	34.95	34.37	36.6	36.41	37.33	37.03	34.1	36.66	35.93	37.78	35.33	36.8	36.59
9.68333	34.9	34.13	36.49	36.39	37.43	37.03	34.12	36.65	35.95	37.81	35.39	36.71	36.66
9.7	34.84	34.06	36.61	36.45	37.51	36.98	34.11	36.57	35.95	37.77	36.07	36.52	36.85
9.71667	34.82	34.14	36.64	36.52	37.54	36.98	33.92	36.45	35.95	37.66	36.31	36.47	36.99
9.73333	34.79	34.88	36.66	36.6	37.39	36.95	33.86	36.41	35.96	37.74	36.34	36.37	37.06
9.75	34.76	35.24	36.7	36.51	36.97	36.92	34.05	36.59	35.96	37.77	36.38	36.27	37.06
9.76667	34.74	35.26	36.71	36.13	36.85	37.1	34.17	36.7	35.95	37.8	36.43	36.23	37.14
9.78333	34.69	35.3	36.73	36.07	36.84	37.24	34.23	36.72	35.92	37.73	36.46	36.23	37.24
9.8	34.65	35.56	36.83	36.6	36.8	37.37	34.21	36.73	35.85	37.44	36.47	36.36	37.23
9.81667	34.65	35.93	37.04	36.66	36.77	37.47	34.29	36.72	35.79	37.23	36.36	36.42	37
9.83333	34.68	36.23	37.12	36.68	36.76	37.58	35.11	36.68	35.72	37.14	36.06	36.44	36.87
9.85	34.71	36.3	37.15	36.66	36.91	37.61	35.38	36.58	35.69	37.02	36	36.38	36.81
9.86667	34.72	36.24	37.15	36.34	36.89	37.65	35.19	36.47	35.69	36.8	36.05	36.25	36.59
9.88333	34.71	35.8	37.11	36.51	36.92	37.62	35.01	36.43	35.77	36.68	36.03	36.19	36.45
9.9	34.69	35.17	37.02	36.62	36.95	37.59	34.99	36.43	35.8	36.67	35.89	36.14	36.59
9.91667	34.68	34.82	37.03	36.63	36.89	37.62	35.17	36.4	35.77	36.71	35.6	36.04	36.77
9.93333	34.72	34.62	37.04	36.63	36.73	37.57	35.19	36.35	35.73	36.69	35.69	35.95	37.02
9.95	34.83	34.56	37.06	36.59	36.62	37.5	35.11	36.39	35.66	36.61	35.65	35.92	37.06
9.96667	34.96	34.53	37	36.62	36.57	37.52	34.98	36.46	35.64	36.58	35.53	35.9	36.75
9.98333	35.45	34.55	36.97	36.64	36.49	37.55	34.76	36.48	35.69	36.58	35.74	35.89	36.58
10	35.55	34.46	36.9	36.66	36.56	37.64	34.73	36.48	35.73	36.51	36.06	35.92	36.46

## Sheet: PirtCre Cool
Time	Trpv1fl/fl	Trpv1fl/fl	Trpv1fl/fl	Trpv1fl/fl	Trpv1fl/fl	Trpv1fl/fl	PirtCre;Trpv1fl/fl	PirtCre;Trpv1fl/fl	PirtCre;Trpv1fl/fl	PirtCre;Trpv1fl/fl	PirtCre;Trpv1fl/fl	PirtCre;Trpv1fl/fl	PirtCre;Trpv1fl/fl
	Q234	Q235	Q261	R274	S025	S026	Q233	Q259	Q260	R275	R277	S023	S024
-1	34.55	34.66	35.24	35.03	36.06	35.2	35.62	35.15	35.27	35.73	34.07	35.98	35.67
-0.98333	34.55	34.73	35.22	35.03	36.09	35.19	35.61	35.1	35.2	35.86	34.06	35.87	35.66
-0.96667	34.57	34.85	35.19	35.03	36.21	35.19	35.58	34.88	35.24	35.96	34.08	35.81	35.65
-0.95	34.62	34.96	35.24	35.05	36.26	35.18	35.55	34.83	35.28	36.03	34.1	35.74	35.69
-0.93333	34.64	34.93	35.36	34.95	36.23	35.18	35.5	34.73	35.25	36.06	34.12	35.63	35.72
-0.91667	34.64	34.79	35.47	34.77	36.19	35.18	35.46	34.81	35.17	36.05	34.21	35.57	35.74
-0.9	34.66	34.73	35.52	34.68	36.18	35.18	35.44	34.94	35.11	36.02	34.56	35.57	35.78
-0.88333	34.67	34.71	35.55	34.69	36.18	35.18	35.42	35.1	35.06	35.92	34.73	35.61	35.8
-0.86667	34.67	34.68	35.55	34.74	36.2	35.17	35.41	35.25	35	35.91	34.77	35.61	35.8
-0.85	34.66	34.64	35.56	34.99	36.18	35.16	35.38	35.36	34.97	35.85	34.74	35.61	35.8
-0.83333	34.69	34.59	35.56	35.09	36.2	35.18	35.37	35.56	34.94	35.78	34.72	35.6	35.79
-0.81667	34.69	34.54	35.56	35.08	36.15	35.19	35.36	35.7	34.87	35.72	34.74	35.59	35.74
-0.8	34.66	34.59	35.56	35.05	36.15	35.18	35.36	35.76	34.82	35.63	34.75	35.61	35.52
-0.78333	34.61	34.63	35.53	35.09	36.22	35.21	35.35	35.75	34.81	35.46	34.76	35.67	35.35
-0.76667	34.6	34.55	35.43	35.11	36.3	35.25	35.34	35.69	34.86	35.25	34.8	35.68	35.3
-0.75	34.59	34.46	35.43	35.16	36.25	35.28	35.33	35.66	34.92	35.13	34.84	35.61	35.16
-0.73333	34.59	34.38	35.65	35.2	36.06	35.3	35.31	35.65	34.99	35.03	34.88	35.52	35.11
-0.71667	34.69	34.28	35.79	35.21	35.68	35.28	35.3	35.58	35.03	34.89	34.98	35.49	35.13
-0.7	34.7	34.18	35.8	35.18	35.54	35.19	35.3	35.56	35.08	34.88	35.05	35.49	35.36
-0.68333	34.69	34.1	35.77	35.11	35.55	35.2	35.3	35.53	35.12	34.87	35.11	35.5	35.5
-0.66667	34.64	34.04	35.72	35.13	35.66	35.21	35.32	35.51	35.2	34.86	35.16	35.49	35.54
-0.65	34.65	33.95	35.68	35.16	35.74	35.2	35.33	35.47	35.21	34.86	35.22	35.47	35.63
-0.63333	34.74	33.92	35.61	35.17	35.82	35.2	35.42	35.43	35.21	34.91	35.3	35.46	35.72
-0.61667	34.83	34.08	35.61	35.19	35.86	35.2	35.53	35.38	35.16	35.05	35.41	35.45	35.73
-0.6	34.86	34.14	35.71	35.23	35.86	35.18	35.55	35.34	35.08	35.19	35.53	35.41	35.74
-0.58333	34.87	34.19	35.83	35.21	35.83	35.14	35.54	35.27	35.06	35.3	35.63	35.39	35.79
-0.56667	34.89	34.2	35.86	35.15	35.77	35.1	35.53	35.21	35.03	35.37	35.7	35.33	36.05
-0.55	34.91	34.17	35.86	35.12	35.72	35.07	35.47	35.15	35.02	35.41	35.73	35.31	36.15
-0.53333	34.94	34.14	35.86	35.12	35.64	35.04	35.46	35.12	35.01	35.43	35.74	35.32	36.3
-0.51667	34.95	34.11	35.83	35.14	35.58	35.02	35.44	35.1	35	35.43	35.75	35.36	36.57
-0.5	35.15	34.08	35.78	35.14	35.5	35	35.42	35.07	34.99	35.43	35.74	35.49	36.61
-0.48333	35.19	34.07	35.77	35.14	35.43	34.99	35.39	35.05	35.02	35.4	35.71	35.48	36.52
-0.46667	35.18	34.03	35.77	35.14	35.35	34.96	35.37	34.99	35.04	35.3	35.66	35.39	36.63
-0.45	35.15	33.98	35.74	35.15	35.27	34.94	35.42	34.97	35.09	35.21	35.61	35.24	36.64
-0.43333	35.07	33.95	35.7	35.16	35.18	35.06	35.44	34.97	35.25	35.19	35.54	35.18	36.56
-0.41667	35.02	34.1	35.65	35.16	35.09	35.1	35.48	34.98	35.27	35.15	35.46	35.21	36.48
-0.4	35.01	34.13	35.6	35.16	35.04	35.04	35.53	34.98	35.35	35.1	35.36	35.17	36.39
-0.38333	35.28	34.12	35.56	35.22	34.98	35.46	35.56	34.98	35.57	35.07	35.27	35.04	36.29
-0.36667	35.7	34.08	35.52	35.2	34.9	35.61	35.64	34.95	35.71	35.12	35.18	34.93	36.2
-0.35	35.77	34.03	35.48	35.06	34.81	35.58	35.71	34.88	35.79	35.23	35.11	35.06	36.11
-0.33333	35.8	33.99	35.45	34.98	34.73	35.55	35.76	34.87	35.85	35.25	35.05	35.07	36.04
-0.31667	35.72	33.96	35.41	34.97	34.65	35.63	35.85	34.91	35.94	35.25	35.01	35.15	35.97
-0.3	35.4	33.97	35.36	35	34.57	35.69	35.87	34.94	36	35.21	34.99	35.52	35.92
-0.28333	35.21	34.22	35.29	35	34.5	35.7	35.87	34.94	36.03	35.13	34.96	35.68	35.89
-0.26667	34.96	34.3	35.27	34.97	34.42	35.72	35.86	34.95	36.02	35.02	34.94	35.84	35.87
-0.25	34.93	34.3	35.23	34.93	34.35	35.75	35.86	34.97	36	34.95	34.94	36.05	35.86
-0.23333	34.96	34.28	35.2	34.9	34.28	35.74	35.86	35.01	35.95	34.92	34.94	36.13	35.85
-0.21667	35.39	34.18	35.16	34.85	34.2	35.69	35.85	35.02	35.9	34.88	35.09	36.25	35.85
-0.2	35.56	34.09	35.13	34.75	34.13	35.62	35.81	35.02	35.77	34.84	35.2	36.31	35.83
-0.18333	35.57	34.09	35.13	34.64	34.07	35.56	35.88	35.02	35.61	34.79	35.21	36.29	35.8
-0.16667	35.57	34.12	35.12	34.61	34.03	35.52	35.97	35.02	35.55	34.72	35.22	36.27	35.73
-0.15	35.66	34.14	35.1	34.68	33.96	35.45	36.13	35.02	35.53	34.72	35.24	36.32	35.68
-0.13333	35.81	34.16	35.09	34.72	33.89	35.41	36.34	35.02	35.71	34.71	35.31	36.31	35.68
-0.11667	35.85	34.19	35.1	34.7	33.83	35.39	36.36	35.02	35.88	34.68	35.31	36.25	35.67
-0.1	35.85	34.16	35.16	34.63	33.76	35.38	36.36	35.04	35.92	34.66	35.29	36.22	35.67
-0.08333	35.9	34.14	35.18	34.63	33.71	35.37	36.32	35.11	35.95	34.63	35.28	36.15	35.65
-0.06667	36.06	34.24	35.18	34.71	33.65	35.35	36.32	35.14	35.92	34.6	35.27	35.89	35.64
-0.05	36.13	34.21	35.19	34.76	33.6	35.34	36.31	35.12	35.88	34.56	35.14	35.8	35.64
-0.03333	36.09	34.09	35.19	34.78	33.58	35.3	36.28	35.12	35.81	34.52	35	35.89	35.64
-0.01667	35.71	34.09	35.18	34.78	33.54	35.29	36.2	35.12	35.71	34.48	34.93	36.1	35.64
0	35.52	34.1	35.17	34.77	33.5	35.39	36.12	35.17	35.67	34.4	34.89	36.29	35.64
0.016667	35.53	33.91	35.17	34.77	33.46	35.5	36.07	35.3	35.67	34.32	34.92	36.38	35.65
0.033333	35.54	33.8	35.16	34.76	33.42	35.61	36.06	35.37	35.65	34.32	34.98	36.47	35.72
0.05	35.75	33.85	35.14	34.72	33.38	36	36.09	35.4	35.58	34.38	34.89	36.52	35.72
0.066667	35.83	33.83	35.1	34.63	33.34	36.15	36.08	35.41	35.47	34.37	34.83	36.52	35.75
0.083333	35.92	33.79	35.09	34.6	33.29	36.2	36.06	35.42	35.23	34.34	34.75	36.48	35.84
0.1	35.9	33.79	35.12	34.62	33.26	36.15	36.03	35.42	35.49	34.36	34.95	36.43	35.75
0.116667	35.78	33.77	35.17	34.55	33.24	36.06	35.99	35.47	35.57	34.38	35.05	36.38	35.56
0.133333	35.71	33.74	35.16	34.43	33.22	36.16	35.94	35.49	35.67	34.38	34.94	36.29	35.67
0.15	35.64	33.69	35.2	34.46	33.21	36.24	35.9	35.61	35.83	34.36	34.87	36.21	35.83
0.166667	35.72	33.7	35.3	34.47	33.22	36.26	35.78	35.76	35.82	34.31	34.86	36.13	36.06
0.183333	35.85	33.7	35.33	34.48	33.3	36.27	35.63	35.83	35.88	34.39	34.84	36.06	36.2
0.2	35.82	33.7	35.38	34.86	33.32	36.25	35.52	35.92	36.1	34.51	34.89	36.01	36.27
0.216667	35.73	33.63	35.47	34.94	33.32	36.23	35.52	35.94	36.08	34.58	34.95	36	36.24
0.233333	35.62	33.5	35.65	34.9	33.31	36.22	35.54	35.96	35.97	34.68	34.95	36.05	36.11
0.25	35.51	33.41	35.7	35.07	33.32	36.25	35.55	35.95	36.04	34.73	35.02	36.07	36.09
0.266667	35.42	33.43	35.74	35.37	33.32	36.15	35.53	35.92	36.07	34.77	35.04	36.08	36.27
0.283333	35.35	33.56	35.86	35.44	33.32	35.91	35.52	35.9	36.11	34.75	35	36.07	36.29
0.3	35.3	33.66	35.84	35.25	33.28	35.85	35.51	35.86	36.19	34.6	35.1	36.02	36.18
0.316667	35.29	33.75	35.72	34.99	33.09	35.8	35.47	35.87	36.26	34.32	35.11	35.93	36.14
0.333333	35.43	33.56	35.75	34.9	33.05	35.83	35.39	35.88	36.26	34.43	35.04	35.86	36.16
0.35	35.52	33.5	35.89	34.88	33.13	35.94	35.33	35.88	36.2	34.64	35.01	35.8	36.34
0.366667	35.56	33.59	35.99	34.5	33.29	36.11	35.31	35.88	36.21	34.89	34.94	35.74	36.47
0.383333	35.55	33.65	35.97	34.32	33.45	36.15	35.3	35.87	36.2	35.1	34.96	35.76	36.5
0.4	35.82	33.62	35.93	34.63	33.52	36.13	35.28	35.81	36.07	35.22	35.03	35.79	36.5
0.416667	36.08	33.41	35.93	34.54	33.6	36.07	35.2	35.74	36.15	35.39	35	35.77	36.54
0.433333	36.13	33.16	36.01	34.27	33.64	35.99	35.11	35.67	36.22	35.55	34.9	35.83	36.57
0.45	36.32	33.1	36.17	34.22	33.64	35.92	35.02	35.74	36.18	35.59	34.92	36.08	36.56
0.466667	36.36	33.21	36.2	34.46	33.78	35.84	34.93	36.01	36.2	35.59	35.03	36.24	36.54
0.483333	36.33	33.28	36.2	34.47	33.88	35.76	34.85	35.96	36.2	35.6	35.19	36.39	36.49
0.5	36.14	33.33	36.18	34.24	33.88	35.68	34.84	35.82	36.13	35.71	35.28	36.54	36.44
0.516667	36.17	33.35	36.11	34.03	33.88	35.6	34.82	35.8	36.05	35.89	35.2	36.65	36.42
0.533333	36.15	33.34	36.05	34.14	33.87	35.53	34.78	35.77	36.01	36.05	35.21	36.77	36.38
0.55	36.12	33.28	35.95	34.47	33.82	35.58	34.72	35.64	35.94	36.14	35.47	36.85	36.39
0.566667	36.1	33.27	35.87	34.48	33.77	35.66	34.67	35.56	35.82	36.22	35.49	36.9	36.41
0.583333	36.01	33.23	35.82	34.42	33.69	35.76	34.6	35.6	35.56	36.59	35.43	37.02	36.42
0.6	36.01	33.16	35.76	34.11	33.59	35.94	34.51	35.66	35.44	36.68	35.37	37.09	36.43
0.616667	35.99	33.09	35.7	33.21	33.52	35.93	34.46	35.62	35.57	36.67	35.31	37.05	36.46
0.633333	35.99	33.03	35.65	33.06	33.47	35.95	34.48	35.52	35.59	36.63	35.28	37.01	36.47
0.65	36.02	32.96	35.59	33.84	33.39	36.02	34.47	35.6	35.9	36.65	35.24	37.04	36.45
0.666667	36.06	32.91	35.54	33.97	33.32	36.04	34.4	35.56	36.01	36.68	35.23	37.03	36.42
0.683333	36.08	32.84	35.5	33.63	33.27	35.99	34.31	35.39	35.85	36.82	35.23	36.93	36.36
0.7	35.95	32.77	35.46	33.19	33.21	35.78	34.25	35.31	35.54	36.86	35.2	36.81	36.27
0.716667	35.87	32.7	35.42	33.24	33.14	35.74	34.23	35.39	35.39	36.84	35.15	36.72	36.16
0.733333	35.8	32.64	35.4	33.75	33.09	35.57	34.64	35.62	35.23	36.74	34.99	36.69	36.05
0.75	35.72	32.6	35.38	33.82	33.05	35.26	34.74	35.71	35.12	36.66	34.63	36.66	35.92
0.766667	35.64	32.58	35.37	33.79	32.98	35.22	34.76	35.71	35.1	36.59	34.45	36.73	35.87
0.783333	35.53	32.56	35.33	33.99	32.96	35.14	34.87	35.66	35.13	36.51	34.56	36.79	35.89
0.8	35.42	32.54	35.31	34.15	32.93	34.88	34.88	35.57	35.22	36.45	34.85	36.7	35.93
0.816667	35.32	32.5	35.31	34.06	32.89	34.76	34.87	35.54	35.35	36.32	34.9	36.54	35.94
0.833333	35.24	32.46	35.31	34.1	32.87	34.76	34.88	35.43	35.46	36.3	34.9	36.46	35.98
0.85	35.13	32.43	35.31	34.12	32.85	34.7	34.88	35.27	35.51	36.41	34.88	36.53	36.04
0.866667	35.08	32.38	35.34	34.09	32.84	34.56	34.87	35.22	35.53	36.62	34.79	36.55	36.06
0.883333	35.09	32.32	35.37	34.03	32.79	34.52	34.84	35.19	35.5	36.69	34.87	36.51	36.05
0.9	35.08	32.27	35.32	33.95	32.7	34.51	34.78	35.14	35.37	36.67	35.13	36.41	36
0.916667	35.14	32.22	35.31	34.46	32.68	34.53	34.7	35.08	35.12	36.59	35.13	36.28	35.93
0.933333	35.52	32.17	35.45	34.99	32.69	34.58	34.56	35.04	35.02	36.4	35.06	36.15	35.96
0.95	35.66	32.13	35.49	35.16	32.74	34.58	34.32	35	34.94	35.98	34.99	36.01	35.98
0.966667	35.69	32.09	35.5	35.2	32.77	34.56	34.23	34.96	34.84	35.87	34.88	35.91	35.94
0.983333	35.69	32	35.48	34.99	32.78	34.56	34.17	34.94	34.62	35.77	34.8	35.84	35.88
1	35.69	31.97	35.47	34.79	32.77	34.54	34.14	34.99	34.53	35.63	34.7	35.76	35.85
1.01667	35.76	31.96	35.71	34.75	32.76	34.49	34.18	35	34.51	35.51	34.59	35.7	35.84
1.03333	35.79	31.95	35.76	34.74	32.74	34.46	34.3	34.99	34.5	35.45	34.32	35.62	35.86
1.05	35.79	31.94	35.76	34.72	32.73	34.41	34.42	34.94	34.35	35.41	34.22	35.53	35.9
1.06667	35.79	31.88	35.91	34.66	32.72	34.27	34.4	34.89	34.26	35.34	34.33	35.41	35.89
1.08333	35.8	31.83	35.97	34.49	32.6	34.18	34.33	34.87	34.24	35.41	34.36	35.3	35.84
1.1	35.8	31.83	35.9	34.18	32.52	34.2	34.31	34.84	34.19	35.51	34.27	35.18	35.77
1.11667	35.78	31.83	35.77	34	32.57	34.16	34.28	34.83	34.21	35.53	34.09	35.09	35.7
1.13333	35.76	31.88	35.73	33.8	32.58	34.17	34.23	34.82	34.33	35.53	33.92	35.01	35.61
1.15	35.8	31.97	35.7	33.69	32.59	34.11	34.18	34.83	34.25	35.43	33.84	34.94	35.53
1.16667	35.89	32.06	35.88	33.59	32.63	34	34.14	34.94	34.25	35.24	33.75	34.91	35.49
1.18333	35.91	32.1	36.16	33.51	32.63	33.94	34.16	34.96	34.45	35.15	33.67	34.89	35.46
1.2	35.9	32.06	36.17	33.43	32.64	34	34.13	34.9	34.45	35.08	33.59	34.88	35.39
1.21667	35.99	31.84	36.12	33.34	32.61	34.06	33.9	34.94	34.47	35	33.61	34.88	35.36
1.23333	36.06	31.8	35.99	33.35	32.57	34.27	33.85	34.96	34.59	34.98	33.76	34.89	35.32
1.25	35.95	31.75	35.88	33.49	32.57	34.3	33.81	34.91	34.64	34.84	33.74	34.9	35.29
1.26667	35.79	31.67	35.85	33.54	32.55	34.24	33.8	34.82	34.66	34.65	33.63	34.89	35.24
1.28333	35.66	31.73	35.87	33.56	32.51	34.17	33.77	34.82	34.99	34.6	33.57	34.84	35.19
1.3	35.57	31.73	35.96	33.42	32.5	34.23	33.74	34.84	35.11	34.65	33.5	34.8	35.11
1.31667	35.51	31.73	36	33.19	32.5	34.28	33.71	34.86	35.13	34.87	33.42	34.78	35.01
1.33333	35.47	31.77	36.01	33.06	32.46	34.28	33.7	34.85	35.21	34.98	33.35	34.76	34.88
1.35	35.43	31.78	36	32.99	32.36	34.27	33.68	34.79	35.35	34.98	33.29	34.73	34.73
1.36667	35.39	31.76	35.93	33.23	32.32	34.25	33.73	34.76	35.39	34.88	33.53	34.69	34.6
1.38333	35.33	31.79	35.86	33.29	32.28	34.21	33.8	34.68	35.38	34.81	33.78	34.68	34.55
1.4	35.25	31.84	35.78	33.26	32.28	34.04	33.82	34.66	35.62	34.71	33.8	34.74	34.53
1.41667	35.18	31.84	35.7	33.37	32.32	33.92	33.82	34.62	35.63	34.71	33.79	34.84	34.26
1.43333	35.12	31.83	35.63	33.59	32.37	33.83	33.81	34.61	35.57	34.69	33.77	34.86	33.79
1.45	35.03	31.83	35.55	33.59	32.37	33.65	33.99	34.61	35.57	34.69	33.79	34.93	33.97
1.46667	34.97	31.82	35.49	33.33	32.39	33.47	34.06	34.6	35.55	34.71	33.87	35.08	34.35
1.48333	34.93	31.77	35.43	32.89	32.47	33.39	33.91	34.76	35.5	34.73	33.93	35.14	34.49
1.5	34.93	31.77	35.35	32.74	32.5	33.39	33.87	34.81	35.46	34.67	33.95	35.35	34.36
1.51667	35.02	31.79	35.32	32.71	32.52	33.38	33.85	34.82	35.42	34.21	33.98	35.48	33.89
1.53333	35.04	31.78	35.26	32.7	32.55	33.24	33.86	34.82	35.31	34	34.06	35.5	33.57
1.55	35.06	31.79	35.22	32.73	32.6	33.19	33.88	34.79	35.22	33.97	34.14	35.41	33.62
1.56667	35.11	31.81	35.18	32.86	32.68	33.22	33.88	34.69	35.08	34.01	34.17	35.33	33.9
1.58333	35.11	31.83	35.14	33.29	32.75	33.22	33.88	34.6	34.84	34.07	34.16	35.27	33.99
1.6	35.06	31.88	35.1	33.39	32.93	33.19	34.03	34.5	34.67	34.16	34.14	35.19	33.91
1.61667	34.99	31.91	35.07	33.46	32.96	33.16	34.08	34.38	34.46	34.28	34.13	35.15	33.88
1.63333	34.96	31.9	35.05	33.07	32.82	33.15	34.07	34.46	34.47	34.4	34.04	35.07	34.13
1.65	34.95	31.94	35.2	32.3	32.84	33.22	34.02	34.51	34.56	34.48	33.94	35.04	34.38
1.66667	34.91	31.99	35.22	32.32	32.95	33.74	33.97	34.54	34.63	34.62	33.89	35.07	34.38
1.68333	34.85	32.01	35.22	32.48	32.99	33.74	33.86	34.62	34.88	34.63	33.77	35.05	34.53
1.7	34.88	32.17	35.22	32.34	33.04	33.48	34.01	34.68	34.89	34.71	33.65	34.94	34.8
1.71667	34.86	32.28	35.22	31.96	33.1	33.4	34.16	34.72	34.83	34.85	33.58	34.82	34.99
1.73333	34.79	32.31	35.18	32.91	33.16	33.43	34.2	34.72	34.82	34.89	33.53	34.74	35.21
1.75	34.84	32.33	35.15	34.66	33.22	33.37	34.18	34.72	34.77	34.9	33.51	34.66	35.4
1.76667	35.22	32.35	35.13	34.95	33.25	33.29	34.15	34.72	34.65	34.9	33.52	34.58	35.43
1.78333	35.35	32.41	35.14	35.1	33.3	33.22	34.12	34.67	34.65	34.86	33.72	34.53	35.44
1.8	35.16	32.4	35.15	35.12	33.38	33.21	34.07	34.55	34.65	34.77	33.75	34.46	35.63
1.81667	34.95	32.36	35.1	35.08	33.42	33.17	34	34.53	34.64	34.73	33.25	34.39	35.74
1.83333	35.16	32.23	34.95	34.98	33.35	33.02	33.95	34.53	34.62	34.62	32.78	34.66	35.74
1.85	35.28	32.09	34.82	34.88	33.37	33	34.05	34.52	34.57	34.56	32.75	34.74	35.7
1.86667	35.3	31.99	34.78	34.76	33.71	33.22	34.12	34.5	34.49	34.54	32.84	34.79	35.75
1.88333	35.3	31.97	34.75	34.62	33.9	33.17	34.03	34.49	34.45	34.53	33.71	34.83	35.83
1.9	35.29	31.96	34.57	34.56	34.04	33.28	34.02	34.48	34.4	34.49	34.48	34.89	35.81
1.91667	35.27	31.9	34.5	34.7	34.07	33.33	34.07	34.48	34.33	34.38	34.98	34.9	35.75
1.93333	35.24	31.94	34.46	34.68	34.19	33.29	34.65	34.48	34.18	34.25	35.13	34.89	35.67
1.95	35.22	31.97	34.43	34.63	34.34	33.23	34.74	34.42	34.04	34.12	35.15	34.93	35.65
1.96667	35.18	31.93	34.41	34.61	34.35	33.34	34.6	34.37	34.05	33.98	35.13	35.13	35.64
1.98333	35.15	31.91	34.41	34.47	34.53	33.67	34.68	34.39	34.14	33.92	35.05	35.3	35.59
2	35.12	31.89	34.4	34.13	34.59	34.01	34.92	34.43	34.35	33.88	34.92	35.4	35.55
2.01667	35.08	31.85	34.43	33.86	34.7	34.13	35.12	34.45	34.38	33.76	34.77	35.44	35.53
2.03333	35.03	31.85	34.55	33.79	34.9	34.17	35.36	34.44	34.47	33.69	34.54	35.43	35.49
2.05	35.02	31.95	34.62	34.17	34.97	34.16	35.45	34.39	34.5	33.61	34.39	35.34	35.44
2.06667	35.03	32	34.65	34.3	34.91	33.97	35.21	34.39	34.5	33.61	34.24	35.26	35.4
2.08333	34.99	31.96	34.77	34.29	34.84	33.82	35.06	34.42	34.52	33.61	34.14	35.22	35.34
2.1	34.93	31.85	34.93	34.22	34.73	33.78	35.29	34.43	34.55	33.56	34.01	35.23	35.29
2.11667	34.9	32.05	35.11	34.13	34.6	33.53	35.58	34.4	34.56	33.45	33.87	35.22	35.27
2.13333	34.85	32.29	35.41	34.12	34.43	33.36	35.77	34.18	34.55	33.36	33.99	35.17	35.23
2.15	34.79	32.51	35.48	34.15	34.28	33.49	36.36	34.05	34.5	33.27	34.14	35.12	35.16
2.16667	34.74	32.5	35.54	34.11	34.15	33.79	36.67	34.21	34.49	33.17	34.63	35.05	35.13
2.18333	34.76	32.4	35.54	33.93	34.03	33.99	36.72	34.32	34.51	33.09	34.81	34.8	35.11
2.2	34.81	32.37	35.69	33.78	33.89	34.13	36.6	34.35	34.53	33.01	34.85	34.75	35.01
2.21667	34.83	32.38	36	33.7	33.77	34.16	36.47	34.32	34.53	32.94	34.83	34.76	34.93
2.23333	34.83	32.41	36.13	33.67	33.63	34.16	36.33	34.21	34.52	32.86	34.68	34.77	34.88
2.25	34.61	32.33	36.14	33.69	33.49	34.09	36.19	34.16	34.5	32.81	34.51	34.76	34.88
2.26667	34.33	32.39	36.17	34	33.34	33.79	36.19	34.3	34.49	32.76	34.28	34.74	35
2.28333	34.18	32.49	36.02	34.16	33.24	33.7	36.16	34.61	34.53	32.69	33.93	34.6	35.07
2.3	34.49	32.56	35.91	34.18	33.16	33.7	36.08	34.75	34.56	32.63	33.72	33.95	35.09
2.31667	34.61	32.69	36.13	34.14	33.06	33.67	36.08	34.73	34.6	32.59	33.57	33.96	35.08
2.33333	34.62	32.75	36.22	34.11	32.98	33.63	36.12	34.75	34.63	32.57	33.48	33.97	35.06
2.35	34.59	32.9	36.26	34.18	32.93	33.57	36.07	34.79	34.64	32.58	33.42	33.79	35.04
2.36667	34.56	33.16	36.07	34.35	32.88	33.49	36.01	34.85	34.63	32.61	33.37	33.69	35.03
2.38333	34.53	33.23	35.82	34.41	32.82	33.44	36.39	34.9	34.63	32.68	33.3	33.61	35.01
2.4	34.51	33.28	35.85	34.4	32.77	33.37	36.49	34.91	34.64	32.9	33.19	33.56	34.96
2.41667	34.5	33.43	35.85	34.28	32.74	33.26	36.42	34.9	34.61	33.19	33.2	33.56	34.94
2.43333	34.54	33.66	35.81	33.95	32.71	33.29	36.18	34.81	34.51	33.3	33.22	33.55	34.91
2.45	34.55	33.73	35.73	33.58	32.7	33.36	36.02	34.75	34.49	33.34	33.23	33.54	34.89
2.46667	34.58	33.75	35.56	33.53	32.68	33.32	36.03	34.69	34.47	33.53	33.31	33.67	34.85
2.48333	34.61	33.75	35.53	33.81	32.66	33.41	36.09	34.6	34.41	33.66	33.48	33.75	34.74
2.5	34.73	33.74	35.67	33.93	32.66	33.55	36.08	34.55	34.43	33.74	33.59	33.85	34.59
2.51667	34.85	33.7	35.71	33.95	32.67	33.6	36.03	34.5	34.52	33.91	33.55	34.02	34.4
2.53333	35.14	33.64	35.69	33.93	32.68	33.5	35.96	34.38	34.57	34.04	33.4	34.19	34.47
2.55	35.25	33.47	35.64	33.89	32.7	33.47	35.9	34.26	34.66	34.04	33.34	34.44	34.69
2.56667	35.26	33.46	35.57	33.87	32.72	33.5	35.85	34.11	34.7	34.02	33.28	35.15	34.69
2.58333	35.28	33.44	35.52	33.83	32.74	33.4	35.77	34.02	34.7	33.96	33.26	35.36	34.62
2.6	35.21	33.41	35.46	33.73	32.74	33.39	35.71	33.99	34.71	33.89	33.32	35.43	34.65
2.61667	34.64	33.38	35.44	33.75	32.73	33.38	35.64	34	34.96	33.73	33.71	35.39	34.7
2.63333	34.33	33.35	35.41	33.93	32.72	33.33	35.56	33.96	35.1	33.86	33.8	35.26	34.68
2.65	34.27	33.33	35.31	33.96	32.74	33.33	35.5	33.86	35.16	34.01	33.81	35.16	34.63
2.66667	34.32	33.32	35.24	33.89	32.74	33.32	35.44	33.78	35.22	34.07	33.79	35.04	34.58
2.68333	34.38	33.28	35.46	33.87	32.74	33.24	35.34	33.72	35.22	34.09	33.78	34.93	34.58
2.7	34.43	33.19	35.51	33.81	32.74	33.24	35.2	33.72	35.32	34.08	33.81	34.77	34.62
2.71667	34.71	33.16	35.51	33.81	32.73	33.28	35.18	33.76	35.37	34.08	33.85	34.66	34.62
2.73333	35.46	33.1	35.48	33.93	32.74	33.25	35.27	33.77	35.39	34.16	34.13	34.74	34.62
2.75	35.65	33.08	35.45	33.92	32.75	33.17	35.3	33.76	35.43	34.14	34.39	34.81	34.61
2.76667	35.68	33.1	35.42	33.87	32.77	33.1	35.3	33.56	35.48	33.8	34.5	34.82	34.6
2.78333	35.67	33.11	35.41	33.97	32.81	33.07	35.26	33.5	35.33	33.63	34.59	34.78	34.57
2.8	35.62	33.08	35.4	34.33	32.88	33.09	35.21	33.58	34.51	33.7	34.56	34.62	34.55
2.81667	35.71	33.03	35.37	34.62	32.94	33.09	35.18	33.67	34.45	33.79	34.39	34.61	34.54
2.83333	35.7	32.93	35.33	35	32.99	33.02	35.13	33.74	35.13	33.87	34.34	34.59	34.54
2.85	35.42	32.75	35.32	35.3	33.02	33.05	35.08	33.77	35.41	33.98	34.4	34.55	34.52
2.86667	35.35	32.8	35.32	35.37	33.05	33.09	35.04	33.79	35.53	34.03	34.18	34.5	34.52
2.88333	35.63	32.82	35.32	35.34	33.08	33.04	34.99	33.81	35.56	34.05	33.66	34.43	34.54
2.9	35.73	32.8	35.31	35.4	33.12	33	34.69	33.82	35.49	34.04	33.87	34.33	34.57
2.91667	35.75	32.78	35.28	35.52	33.18	33.01	34.45	33.82	35.4	34	34.37	34.2	34.59
2.93333	35.75	32.75	35.23	35.61	33.26	33.1	34.36	33.76	35.33	33.91	34.33	34.16	34.41
2.95	35.7	32.73	35.18	35.63	33.32	33.17	34.33	33.64	35.26	33.73	34.2	34.13	33.85
2.96667	35.64	32.67	35.17	35.63	33.44	33.15	34.32	33.63	35.25	33.69	33.81	34.08	33.78
2.98333	35.66	32.64	35.16	35.85	33.52	33.04	34.23	33.66	35.21	33.75	33.81	34.02	33.93
3	35.61	32.7	35.14	35.93	33.6	32.93	34.13	33.69	35.15	33.85	34.25	34.01	34.04
3.01667	35.53	32.77	35.12	35.96	33.67	32.92	34.11	33.71	35.13	33.94	34.49	33.93	34.31
3.03333	35.47	32.84	35.11	36.03	33.77	32.91	34.09	33.72	35.09	33.99	34.63	33.83	34.5
3.05	35.47	32.84	35.08	36.01	33.85	32.87	34.06	33.72	34.99	34.09	34.65	34.04	34.57
3.06667	35.47	32.76	35.06	35.78	33.92	32.81	34.01	33.72	34.92	34.17	34.64	34.36	34.63
3.08333	35.43	32.6	35.05	35.38	33.97	32.79	34.07	33.71	34.96	34.24	34.64	34.63	34.97
3.1	35.35	32.61	35.04	34.91	34.01	32.79	34.43	33.7	35.12	34.3	34.65	34.89	35.63
3.11667	35.36	32.67	35.04	34.81	34.04	32.83	34.56	33.67	35.2	34.28	34.64	35.06	35.95
3.13333	35.35	32.67	34.92	34.75	34.07	32.85	34.63	33.71	35.39	34.27	34.69	35.15	36
3.15	35.26	32.66	34.9	34.77	34.03	32.91	34.65	34.05	35.58	34.27	34.81	35.2	35.96
3.16667	35.16	32.65	35.25	34.71	33.9	32.91	34.64	34.19	35.69	34.26	34.84	35.3	35.83
3.18333	35.08	32.63	35.27	34.54	33.81	32.86	34.63	34.22	35.75	34.31	34.94	35.39	35.76
3.2	35.03	32.46	35.22	34.5	33.9	32.76	34.63	34.27	35.72	34.24	34.96	35.4	35.7
3.21667	35.01	32.44	35.27	34.84	33.95	32.69	34.61	34.36	35.63	33.94	34.98	35.37	35.63
3.23333	35.03	32.29	35.47	34.95	34.01	32.75	34.55	34.4	35.56	33.89	34.96	35.23	35.58
3.25	35	31.86	35.49	34.84	34.16	32.74	34.43	34.41	35.62	33.88	34.76	35.12	35.59
3.26667	34.81	31.61	35.37	34.66	34.34	32.64	34.29	34.53	35.82	33.85	34.55	35.05	35.62
3.28333	34.67	31.51	35.25	34.75	34.4	32.78	34.35	34.62	35.78	33.8	34.5	34.92	35.63
3.3	34.59	31.46	35.19	34.89	34.47	33.01	34.37	34.54	35.71	33.77	34.49	34.64	35.64
3.31667	34.55	31.41	35.17	34.96	34.59	33.38	34.37	34.44	35.63	33.72	34.47	34.68	35.63
3.33333	34.51	31.36	35.17	35.21	34.81	33.63	34.37	34.31	35.34	33.64	34.43	34.78	35.54
3.35	34.44	31.32	35.15	35.34	34.95	33.75	34.36	34.36	35.25	33.62	34.37	34.81	35.39
3.36667	34.42	31.34	35.08	35.43	35.06	33.76	34.34	34.46	35.27	33.66	34.29	34.82	35.38
3.38333	34.46	31.51	35	35.67	35.09	34.17	34.33	34.56	35.27	33.67	34.24	34.67	35.44
3.4	34.5	31.55	34.98	35.67	35.23	34.29	34.3	34.77	35.27	33.66	34.26	34.47	35.51
3.41667	34.54	31.71	35.01	35.32	35.29	34.23	34.24	35.12	35.24	33.58	34.25	34.38	35.51
3.43333	34.74	32.01	35.13	35.05	35.26	34.17	34.15	35.27	35.23	33.49	34.18	34.34	35.58
3.45	35.06	31.99	35.17	34.99	35.23	34.21	34.14	35.37	35.24	33.51	34.12	34.27	35.65
3.46667	35.08	31.99	35.18	34.95	35.12	34.1	34.11	35.41	35.24	33.51	34.04	34.43	35.68
3.48333	35.07	32.18	35.17	35.02	35.23	33.83	34.15	35.46	35.25	33.43	34.05	34.66	35.69
3.5	35.03	32.2	35.15	35.23	35.26	33.98	34.15	35.54	35.3	33.28	34.37	34.85	35.68
3.51667	35.06	32.26	35.09	35.32	35.27	34.13	34.13	35.57	35.37	33.15	34.5	35.11	35.67
3.53333	35.07	32.29	35.1	35.31	35.49	34.01	34.05	35.62	35.37	33.08	34.68	35.26	35.63
3.55	35.06	32.39	35.12	35.27	35.53	33.81	33.92	35.68	35.37	32.95	34.78	35.4	35.56
3.56667	35.07	32.51	35.09	35.2	35.51	33.79	33.88	35.77	35.38	32.9	34.85	35.65	35.51
3.58333	35.07	32.52	35.07	35.1	35.36	33.9	33.86	35.87	35.44	32.85	34.9	35.81	35.29
3.6	35.07	32.47	35.07	35.09	35.23	34.57	33.81	35.88	35.44	32.87	34.93	35.9	34.69
3.61667	35.09	32.46	35.11	35.06	34.88	34.68	33.82	35.95	35.42	33.02	35.04	35.94	34.37
3.63333	35.08	32.47	35.17	34.94	34.83	34.66	33.89	35.94	35.57	33.26	35.36	35.91	34.39
3.65	35.03	32.57	35.18	34.83	35.13	34.87	33.93	35.85	35.57	33.38	35.31	35.84	34.41
3.66667	35.03	32.79	35.22	34.74	35.16	35.06	33.93	35.88	35.52	33.48	34.97	35.75	34.49
3.68333	35.04	32.85	35.22	34.64	35.13	35.2	33.93	35.95	35.62	33.49	34.5	35.62	34.54
3.7	35.07	32.86	35.22	34.49	35.1	35.24	33.9	36.07	35.65	33.46	34.17	35.53	34.39
3.71667	35.04	32.81	35.22	34.4	35	35.03	33.86	36.1	35.63	33.43	34.59	35.52	33.98
3.73333	34.89	32.69	35.19	34.41	34.99	34.75	33.83	36.09	35.57	33.39	34.75	35.48	33.73
3.75	34.87	32.62	35.18	34.38	35.01	34.56	33.83	36.07	35.46	33.47	34.83	35.37	33.84
3.76667	34.9	32.49	35.17	34.3	35.03	34.35	33.84	35.92	35.35	33.61	34.86	35.25	34.08
3.78333	34.91	32.4	35.13	34.21	35.07	34.7	33.89	35.79	35.41	33.75	34.86	35.1	34.32
3.8	34.93	32.55	35.06	34.03	35.09	34.84	33.91	35.66	35.48	33.83	34.89	34.91	34.44
3.81667	34.97	32.57	34.98	34.01	35.12	34.74	33.92	35.69	35.46	33.85	34.95	34.71	34.35
3.83333	34.96	32.52	34.93	34.07	35.3	34.66	33.93	35.7	35.41	34.09	35.13	34.65	34.21
3.85	34.89	32.49	34.91	34.02	35.35	34.64	34.03	35.84	35.35	34.13	35.27	34.77	34.22
3.86667	34.88	32.74	34.86	33.97	35.32	34.53	34.03	35.94	35.31	34.06	35.39	34.79	34.27
3.88333	34.87	32.97	34.79	33.95	35.21	34.48	33.91	36.03	35.29	34.08	35.4	34.78	35.09
3.9	34.85	33.05	34.67	34.07	34.78	34.53	33.95	36.04	35.29	34.08	35.28	34.79	35.26
3.91667	34.85	33.2	34.64	34.1	34.88	34.56	34.22	35.84	35.23	34	34.76	34.81	35.15
3.93333	34.88	33.54	34.61	34.05	35.08	34.75	34.42	35.48	34.99	33.97	34.02	34.9	34.82
3.95	34.87	33.62	34.51	33.98	35.14	34.76	34.52	35.37	34.8	34.04	33.7	34.97	34.65
3.96667	34.82	33.58	34.5	33.93	35.17	34.7	34.58	35.49	34.91	34.1	33.5	34.97	34.59
3.98333	34.79	33.52	34.49	33.81	35.12	34.7	34.64	35.6	34.98	34.13	33.37	34.92	34.73
4	34.75	33.71	34.41	33.73	34.94	34.69	34.66	35.62	35	34.15	33.22	34.79	35.01
4.01667	34.71	33.83	34.39	33.74	34.74	35.02	34.69	35.62	35.12	34.09	33.27	34.61	35.85
4.03333	34.71	33.86	34.44	33.77	34.58	35.09	34.71	35.57	35.26	34.03	34.3	34.56	36.38
4.05	34.68	33.87	34.45	33.77	34.42	35.22	34.73	35.5	35.22	34.28	34.53	34.49	36.5
4.06667	34.55	33.87	34.49	33.82	34.16	35.45	34.72	35.44	35.64	34.44	34.6	34.34	36.5
4.08333	34.5	33.85	34.5	33.95	34.06	35.45	34.7	35.39	35.89	34.45	34.61	34.19	36.22
4.1	34.53	33.82	34.42	34.13	34.15	35.25	34.66	35.33	35.73	34.36	34.66	34.06	35.02
4.11667	34.77	33.79	34.35	34.16	34.14	35.19	34.64	35.26	35.6	34.33	34.67	34.02	34.22
4.13333	35.03	33.78	34.35	34.1	34.02	35.16	34.64	35.17	35.58	34.35	34.59	33.99	34.19
4.15	35.07	33.75	34.61	34.04	33.86	35.16	34.66	35.02	35.54	34.44	34.57	33.94	34.54
4.16667	35.13	33.7	34.87	33.97	33.57	34.89	34.68	34.88	35.45	34.67	34.55	33.89	34.7
4.18333	35.21	33.69	35.15	33.93	33.35	34.61	34.61	34.93	35.52	34.79	34.51	33.9	34.8
4.2	35.22	33.69	35.34	34.26	33.14	34.56	34.68	35.02	35.81	35.08	34.56	33.9	34.93
4.21667	35.1	33.68	35.41	34.27	32.99	34.17	34.85	35.11	35.81	35.34	34.62	33.88	35.07
4.23333	35.05	33.67	35.42	34.2	32.91	34.18	34.99	35.27	35.75	35.85	34.74	33.87	35.08
4.25	35.16	33.7	35.42	34.12	32.8	34.24	35.08	35.35	35.97	36.01	35.05	33.98	35.05
4.26667	35.36	33.7	35.42	33.76	32.71	34.38	35.49	35.44	36.07	36.18	35.24	34.14	34.99
4.28333	35.73	33.69	35.39	33.56	32.66	34.45	36.13	35.58	36.09	36.28	35.4	34.28	34.84
4.3	36.01	33.69	35.35	34.2	32.57	34.35	36.22	35.73	36.2	36.62	35.5	34.41	34.84
4.31667	35.97	33.71	35.29	34.58	32.56	34.23	36.35	35.84	36.29	36.84	35.77	34.55	34.88
4.33333	35.65	33.75	35.1	34.53	32.64	34.52	36.43	35.9	36.26	37.2	36.18	34.62	34.92
4.35	35.43	33.78	35.12	34.12	32.66	34.88	36.49	36.03	36.24	37.21	36.48	34.65	35.02
4.36667	35.14	33.78	35.12	33.72	32.73	34.74	36.55	36.02	36.28	37.14	36.61	34.74	35.08
4.38333	34.91	33.7	35.12	33.8	32.73	34.5	36.63	35.92	36.28	37.05	36.66	34.93	35.15
4.4	34.85	33.58	35.12	34.18	32.7	34.81	36.73	35.9	36.3	37.2	36.71	35.02	35.22
4.41667	34.92	33.61	35.12	34.28	32.67	35.14	36.85	35.91	36.36	37.39	36.74	35.1	35.22
4.43333	35.25	33.66	35.15	34.09	32.64	35.49	37.03	35.97	36.36	37.47	36.77	35.12	35.05
4.45	35.96	33.7	35.2	33.37	32.63	35.34	37.23	36.1	36.35	37.48	36.94	35.15	35.04
4.46667	36.08	33.75	35.22	32.98	32.61	34.78	37.29	36.14	36.34	37.5	37.09	35.27	35.21
4.48333	36.36	33.79	35.22	32.98	32.57	34.6	37.35	36.14	36.33	37.57	37.15	35.35	35.34
4.5	36.42	33.8	35.31	33.18	32.55	35.03	37.51	36.15	36.31	37.65	37.05	35.4	35.34
4.51667	36.34	33.78	35.25	33.78	32.51	35.85	37.48	36.14	36.29	37.78	37.03	35.4	35.45
4.53333	36.29	33.76	35	33.84	32.48	35.96	37.39	36.05	36.27	37.84	37.06	35.41	35.57
4.55	36.36	33.77	35.19	33.59	32.46	35.71	37.42	35.86	36.25	37.9	37.03	35.43	35.53
4.56667	36.38	33.79	35.64	34.21	32.46	35.52	37.44	35.81	36.25	37.77	36.99	35.39	35.17
4.58333	36.36	33.79	35.65	34.82	32.53	35.75	37.39	35.79	36.25	37.69	36.96	35.34	34.96
4.6	36.31	33.81	35.52	35.39	32.6	35.91	37.27	35.76	36.22	37.67	36.95	35.32	34.95
4.61667	36.29	33.85	35.28	35.79	32.61	35.94	37.27	35.78	36.17	37.67	36.93	35.29	34.95
4.63333	36.24	34	35	35.91	32.6	35.92	37.19	35.95	36.11	37.64	36.79	35.23	35
4.65	36.13	34.24	35	35.89	32.58	35.74	37.06	36	36.13	37.59	36.73	35.21	35.05
4.66667	36.04	34.34	35.05	35.9	32.52	35.17	37.04	36.15	36.24	37.53	36.62	35.26	35.1
4.68333	35.97	34.39	35.37	35.94	32.44	34.95	37.04	36.26	36.27	37.42	36.24	35.45	35.12
4.7	35.92	34.45	35.8	35.92	32.37	35.38	36.89	36.32	36.27	37.41	35.94	35.51	35.13
4.71667	35.88	34.53	36.07	35.81	32.37	35.71	36.81	36.33	36.27	37.51	35.97	35.48	35.07
4.73333	35.84	34.58	36.17	35.71	32.37	35.68	36.8	36.33	36.26	37.5	36.08	35.4	35.23
4.75	35.78	34.7	36.2	35.69	32.38	35.48	36.85	36.33	36.24	37.41	35.85	35.27	35.61
4.76667	35.73	35.03	36.19	35.48	32.37	35.24	36.91	36.29	36.25	37.34	35.64	34.66	35.79
4.78333	35.7	35.09	36.21	35.28	32.38	35.27	36.92	36.22	36.29	37.29	35.93	34.54	35.8
4.8	35.67	35.01	36.29	35.13	32.39	35.54	36.91	36.19	36.29	37.16	36.2	34.52	35.76
4.81667	35.73	34.95	36.45	35.18	32.41	35.7	37.01	36.17	36.29	37.04	36.22	34.71	35.7
4.83333	35.81	34.9	36.48	35.35	32.48	35.62	37.03	36.14	36.31	36.99	36.35	35.09	35.68
4.85	35.86	34.72	36.35	35.31	32.49	35.4	36.99	36.1	36.33	37.03	36.43	35.02	35.6
4.86667	35.87	34.55	36.13	35.18	32.57	35.25	36.93	36.08	36.39	37.06	36.41	34.67	35.6
4.88333	35.87	34.51	35.88	35.13	32.67	35.26	36.85	36.06	36.38	37.2	36.32	34.91	35.65
4.9	35.84	34.48	35.72	34.99	32.75	35.26	36.69	36.04	36.29	37.24	36.21	35.1	35.69
4.91667	35.81	34.48	35.74	34.95	32.8	35.46	36.55	36.02	36.17	37.23	36.11	35.27	35.71
4.93333	35.79	34.49	36.08	34.83	32.84	35.63	36.44	35.99	36.09	37.21	36.02	35.28	35.74
4.95	35.78	34.51	36.4	34.76	32.88	35.29	36.36	35.95	36.05	37.13	35.95	35.32	35.7
4.96667	35.76	34.54	36.58	34.68	32.92	35.28	36.28	35.93	35.97	36.99	35.85	35.33	35.46
4.98333	35.65	34.54	36.7	34.64	32.96	35.6	36.21	35.91	35.93	36.94	35.75	35.1	35.41
5	35.39	34.49	36.73	34.65	32.99	35.73	36.16	35.88	35.91	36.85	35.63	35.02	35.43
5.01667	35.31	34.46	36.72	34.63	33.02	35.69	36.11	35.84	35.83	36.76	35.62	34.79	35.44
5.03333	35.32	34.48	36.64	34.6	33.05	35.32	36.04	35.81	35.74	36.6	35.65	34.69	35.47
5.05	35.43	34.51	36.63	34.57	33.09	34.74	35.98	35.81	35.67	36.44	35.62	34.72	35.57
5.06667	35.54	34.53	36.63	34.53	33.11	34.56	35.93	35.75	35.66	36.31	35.55	34.79	35.5
5.08333	35.55	34.53	36.6	34.48	33.09	34.97	35.99	35.71	35.69	36.25	35.54	34.81	35.05
5.1	35.59	34.53	36.62	34.48	33.1	35.08	36	35.71	35.73	36.17	35.68	34.86	34.96
5.11667	35.66	34.52	36.64	34.5	33.1	35.25	35.96	35.72	35.76	36.11	35.76	35	35.09
5.13333	35.78	34.52	36.64	34.47	33.06	35.38	35.9	35.73	35.78	36.2	35.8	35.06	35
5.15	36.09	34.53	36.62	34.45	33.02	35.36	35.86	35.73	35.85	36.22	35.88	35.1	34.77
5.16667	36.09	34.56	36.6	34.43	32.99	34.83	35.82	35.73	35.86	36.1	35.97	35.34	34.86
5.18333	36.03	34.59	36.55	34.44	32.97	33.98	35.72	35.73	35.84	36.02	36.04	35.37	35.26
5.2	36.01	34.74	36.5	34.55	33.01	33.92	35.64	35.73	35.8	36.08	36.09	35.36	35.57
5.21667	35.95	34.79	36.47	34.63	33.07	33.74	35.59	35.73	35.7	36.16	36.09	35.34	35.6
5.23333	35.91	34.81	36.46	34.67	33.12	34.06	35.56	35.73	35.43	36.13	36.09	35.3	35.38
5.25	35.92	34.82	36.43	34.68	33.14	34.98	35.53	35.73	35.23	36.05	36.08	35.29	35.03
5.26667	35.93	34.8	36.39	34.69	33.17	35.27	35.52	35.73	35.2	36.04	36.04	35.26	35.08
5.28333	35.95	34.77	36.25	34.67	33.21	35.18	35.51	35.75	35.08	36.02	35.95	35.29	35.23
5.3	35.94	34.72	36.15	34.63	33.25	35.02	35.5	35.78	35.19	35.94	35.9	35.31	35.19
5.31667	35.89	34.54	36.08	34.66	33.29	34.76	35.51	35.8	35.36	35.89	35.86	35.11	35.22
5.33333	35.84	34.38	36.03	34.7	33.32	34.79	35.55	35.8	35.5	35.83	35.88	34.92	35.47
5.35	35.78	34.45	36.08	34.71	33.36	34.95	35.56	35.81	35.86	35.73	35.91	35.08	35.51
5.36667	35.74	34.65	36.11	34.71	33.39	35.1	35.56	35.82	36.2	35.58	35.92	35.13	35.4
5.38333	35.72	34.97	36.15	34.71	33.37	35.02	35.55	35.83	36.36	35.4	35.91	35.1	35.17
5.4	35.68	35.01	36.17	34.86	33.29	34.69	35.58	35.85	36.3	35.31	35.87	34.94	35.11
5.41667	35.65	34.91	36.25	34.93	33.2	34.61	35.59	35.91	36.11	35.27	35.75	35.02	35.23
5.43333	35.63	34.89	36.5	34.94	33.11	34.24	35.57	35.92	35.97	35.24	35.51	35.13	35.66
5.45	35.59	34.92	36.53	34.92	33.02	33.98	35.56	35.91	35.89	35.22	35.38	35.23	35.88
5.46667	35.55	34.88	36.51	34.89	32.98	33.61	35.57	35.87	36.09	35.21	35.4	35.7	35.93
5.48333	35.52	34.73	36.48	34.83	32.98	33.44	35.58	35.84	36.2	35.19	35.4	35.89	35.94
5.5	35.54	34.57	36.44	34.77	32.99	33.38	35.61	35.82	36.31	35.18	35.38	35.68	35.95
5.51667	35.6	34.57	36.36	34.72	33.01	33.74	35.61	35.79	36.36	35.26	35.37	35.53	35.97
5.53333	35.6	34.57	36.27	34.61	33.02	34.15	35.61	35.73	36.34	35.36	35.34	35.41	36.16
5.55	35.59	34.56	36.2	34.5	33.02	34.4	35.58	35.73	36.25	35.45	35.26	35.72	36.19
5.56667	35.57	34.53	36.14	34.4	33.04	34.5	35.57	35.71	36.17	35.49	35.21	36.1	36.16
5.58333	35.55	34.43	36.11	34.33	33.05	34.68	35.57	35.71	36.11	35.52	35.2	36.32	36.08
5.6	35.55	34.66	36.11	34.29	33.06	34.9	35.58	35.71	36.05	35.54	35.17	36.69	36
5.61667	35.59	34.94	36.1	34.26	33.08	35.06	35.6	35.72	36.06	35.53	35.17	36.71	35.83
5.63333	35.59	35.04	36.06	34.25	33.09	35.13	35.62	35.72	36.07	35.45	35.15	36.61	35.79
5.65	35.54	35.06	36.01	34.23	33.09	35.18	35.63	35.72	36.06	35.36	35.08	36.63	36
5.66667	35.8	35.02	35.97	34.2	33.08	35.21	35.66	35.72	36.03	35.28	35.05	36.71	36.02
5.68333	35.9	34.91	35.94	34.17	33.05	35.1	35.66	35.72	35.97	35.19	34.98	36.73	35.98
5.7	35.94	34.88	35.9	34.11	33.02	34.73	35.66	35.7	35.95	35.14	34.67	36.6	35.96
5.71667	35.96	34.91	35.82	34.1	33.01	34.21	35.65	35.69	35.97	35.13	34.38	36.34	35.94
5.73333	35.96	34.95	35.75	34.15	33	34.25	35.64	35.73	36	35.06	34.49	36.19	35.94
5.75	35.95	34.99	35.7	34.2	32.99	34.28	35.6	35.74	36	34.95	34.67	36.24	35.94
5.76667	35.93	35.02	35.64	34.2	32.96	34.21	35.56	35.67	35.97	34.86	34.73	36.76	35.94
5.78333	35.92	34.98	35.58	34.16	32.93	34.17	35.52	35.67	35.91	34.73	34.56	36.94	35.92
5.8	35.86	34.73	35.52	34.12	32.89	33.97	35.48	35.67	35.9	34.71	34.64	36.98	35.83
5.81667	35.83	34.71	35.46	34.09	32.89	34.1	35.43	35.65	35.89	34.71	34.73	36.99	35.92
5.83333	35.81	34.86	35.45	34.31	32.92	34.61	35.38	35.79	35.87	34.7	34.76	37.01	35.97
5.85	35.9	34.94	35.49	34.47	32.93	34.98	35.37	35.93	35.85	34.69	34.87	37.03	35.88
5.86667	36.03	34.96	35.5	34.53	32.95	35.26	35.36	35.97	35.82	34.67	35	37.04	35.77
5.88333	36.05	34.96	35.5	34.7	32.98	35.24	35.36	35.96	35.8	34.62	35.02	37.05	35.69
5.9	36.05	34.93	35.5	34.87	33	35.11	35.35	35.91	35.8	34.63	34.97	37.01	35.65
5.91667	36.04	34.86	35.49	34.87	33	35.03	35.34	35.9	35.78	34.67	34.92	36.85	35.62
5.93333	36.03	34.8	35.47	34.73	33.01	35.25	35.44	35.97	35.75	34.66	34.89	36.81	35.6
5.95	36.02	34.73	35.45	34.69	33.02	35.42	35.48	35.98	35.74	34.52	34.84	36.87	35.58
5.96667	35.99	34.65	35.43	34.8	33.02	35.48	35.5	36	35.74	34.48	34.74	36.86	35.57
5.98333	35.97	34.58	35.42	34.91	33.02	35.44	35.53	36.03	35.8	34.5	34.63	36.81	35.58
6	35.96	34.53	35.42	34.92	33.02	35.44	35.56	35.99	35.84	34.52	34.54	36.76	35.58
6.01667	35.94	34.46	35.42	34.96	33.02	35.23	35.56	35.97	35.89	34.53	34.46	36.69	35.56
6.03333	35.92	34.4	35.42	34.93	33.01	34.58	35.56	35.94	35.96	34.53	34.39	36.63	35.58
6.05	35.91	34.38	35.42	34.84	32.97	34.47	35.57	35.94	36.12	34.54	34.37	36.55	35.64
6.06667	35.92	34.37	35.42	34.89	32.99	35	35.57	35.93	36.16	34.52	34.36	36.46	35.66
6.08333	35.97	34.34	35.42	35.62	33.11	35.12	35.57	35.93	36.18	34.34	34.37	36.37	35.74
6.1	36.04	34.31	35.43	35.79	33.16	35.14	35.59	35.91	36.18	34.37	34.41	36.28	35.92
6.11667	36.07	34.27	35.45	35.78	33.19	35.2	35.61	35.86	36.17	34.42	34.57	36.2	35.79
6.13333	36.1	34.23	35.45	35.67	33.2	35.29	35.65	35.81	36.12	34.52	34.79	36.14	35.62
6.15	36.15	34.19	35.43	35.19	33.23	35.34	35.67	35.64	36.1	34.56	34.87	36.08	35.62
6.16667	36.08	34.14	35.4	35.23	33.32	35.33	35.69	35.48	36.19	34.59	35.05	36.01	35.59
6.18333	35.74	34.11	35.41	36.03	33.33	35.14	35.72	35.44	36.24	34.59	35.16	35.96	35.7
6.2	35.67	34.12	35.42	36.28	33.33	35.12	35.72	35.41	36.22	34.57	35.27	35.91	35.77
6.21667	35.68	34.18	35.43	36.2	33.33	35.12	35.72	35.41	35.99	34.57	35.39	35.87	35.9
6.23333	35.77	34.21	35.46	36.05	33.32	35.11	35.69	35.4	35.91	34.54	35.49	35.83	36.01
6.25	35.76	34.23	35.46	35.94	33.34	35.04	35.67	35.37	35.85	34.56	35.57	35.79	36.12
6.26667	35.93	34.25	35.46	35.85	33.36	35	35.65	35.34	35.81	34.62	35.6	35.78	36.21
6.28333	36.28	34.25	35.46	35.76	33.35	34.86	35.62	35.31	35.87	34.67	35.62	35.78	36.26
6.3	36.33	34.25	35.38	35.68	33.32	34.81	35.76	35.26	35.89	34.81	35.72	35.76	36.3
6.31667	36.38	34.25	35.22	35.61	33.37	34.85	35.8	35.23	35.85	34.96	35.7	35.74	36.35
6.33333	36.37	34.24	35.37	35.54	33.43	34.93	35.89	35.2	35.84	35.09	35.42	35.75	36.44
6.35	36.29	34.23	35.47	35.5	33.42	34.97	35.88	35.14	35.86	35.31	35.5	35.75	36.52
6.36667	36.32	34.23	35.38	35.55	33.37	35	35.86	35.12	35.86	35.45	35.83	35.74	36.55
6.38333	36.39	34.26	35.24	35.54	33.36	35	35.85	35.12	35.86	35.52	35.92	35.72	36.55
6.4	36.38	34.27	35.26	35.45	33.39	34.97	35.74	35.12	35.86	35.55	35.95	35.74	36.55
6.41667	36.14	34.27	35.27	35.39	33.6	34.93	35.67	35.12	35.86	35.54	35.99	35.78	36.52
6.43333	35.97	34.29	35.21	35.46	33.75	34.74	35.71	35.12	35.86	35.43	36.03	35.78	36.47
6.45	35.98	34.32	35.1	35.54	33.78	34.57	35.91	35.12	35.84	35.36	36.03	35.78	36.46
6.46667	36.13	34.33	35.15	35.53	33.87	34.36	36.26	35.12	35.79	35.28	36.03	35.75	36.47
6.48333	36.22	34.36	35.17	35.48	33.86	34.34	36.43	35.12	35.77	35.17	36.03	35.68	36.47
6.5	36.26	34.49	35.21	35.45	33.85	34.4	36.59	35.12	35.74	35.11	35.94	35.68	36.45
6.51667	36.29	34.5	35.27	35.46	34.03	34.47	36.71	35.2	35.64	35.03	35.74	35.68	36.41
6.53333	36.31	34.44	35.28	35.57	34.12	34.53	36.85	35.44	35.55	34.98	35.69	35.66	36.38
6.55	36.32	34.32	35.28	35.57	34.13	34.61	36.96	35.58	35.53	34.88	35.84	35.66	36.35
6.56667	36.31	34.24	35.29	35.51	34	34.69	37.1	35.73	35.58	34.81	35.91	35.65	36.32
6.58333	36.3	34.17	35.32	35.46	34.06	34.69	37.23	35.87	35.73	34.8	35.93	35.63	36.3
6.6	36.28	34.12	35.32	35.43	34.11	34.58	37.34	36	35.78	34.8	35.93	35.61	36.35
6.61667	36.25	34.1	35.31	35.4	34.08	34.54	37.43	36.09	35.8	34.77	35.9	35.59	36.36
6.63333	36.22	34.05	35.27	35.37	34.27	34.54	37.51	36.14	35.8	34.77	35.9	35.62	36.35
6.65	36.19	34	35.23	35.34	34.36	34.54	37.42	36.1	35.8	34.77	35.9	35.66	36.36
6.66667	36.17	33.97	35.1	35.42	34.25	34.52	37.04	36.11	35.77	34.76	35.83	35.66	36.35
6.68333	36.17	33.96	34.85	35.48	34.15	34.5	36.72	36.41	35.76	34.82	35.79	35.65	36.33
6.7	36.18	33.96	34.75	35.44	34.32	34.51	36.6	36.59	35.76	34.82	35.89	35.65	36.3
6.71667	36.18	33.97	34.89	35.46	34.39	34.55	36.5	36.65	35.76	34.74	35.95	35.65	36.11
6.73333	36.17	34.1	35.03	35.55	34.64	34.56	36.59	36.62	35.76	34.69	36.03	35.65	35.83
6.75	36.18	34.2	35.19	35.64	34.99	34.57	36.73	36.7	35.76	34.63	36.1	35.65	35.56
6.76667	36.19	34.49	35.21	35.63	35.22	34.58	36.63	37.1	35.79	34.76	36.15	35.6	35.5
6.78333	36.18	34.6	35.53	35.62	35.43	34.45	36.23	37.28	35.81	34.97	36.18	35.61	35.47
6.8	36.18	34.59	35.8	35.61	35.33	34	36.1	37.34	35.81	35.27	36.14	35.61	35.52
6.81667	36.18	34.53	35.99	35.56	35.31	33.56	36.16	37.37	35.81	35.52	35.96	35.59	35.61
6.83333	36.16	34.57	36.05	35.55	35.38	33.45	36.13	37.47	35.81	35.87	35.95	35.62	35.62
6.85	36.13	34.69	35.96	35.55	35.46	33.28	36.15	37.48	35.81	36.19	35.98	35.64	35.57
6.86667	36.14	34.76	35.74	35.55	35.5	33.32	36.22	37.34	35.78	36.57	35.98	35.7	35.54
6.88333	36.15	34.76	35.89	35.45	35.63	33.52	36.43	36.97	35.76	36.91	35.88	35.7	35.49
6.9	36.13	34.59	36.03	35.46	35.85	33.58	36.55	36.86	35.73	37.16	35.5	35.69	35.49
6.91667	36.09	34.51	36.06	35.53	35.87	33.73	36.58	36.68	35.71	37.27	35	35.64	35.67
6.93333	36.07	34.59	36.04	35.55	36.01	33.89	36.58	36.61	35.71	37.29	34.62	35.59	36.39
6.95	36.09	34.61	36.02	35.57	36.07	34.21	36.58	36.66	35.78	37.26	34.57	35.57	36.55
6.96667	36.13	34.68	36.1	35.67	35.88	34.55	36.57	36.68	35.8	37.16	34.75	35.55	36.63
6.98333	36.14	34.81	36.08	35.71	35.63	34.63	36.55	36.67	35.8	37.09	34.8	35.53	36.69
7	36.14	34.77	35.87	35.69	35.52	34.69	36.49	36.67	35.77	37.19	34.8	35.46	36.66
7.01667	36.15	34.82	35.59	35.62	35.62	34.7	36.4	36.67	35.68	37.25	34.8	35.42	36.6
7.03333	36.16	34.76	35.48	35.55	35.94	34.69	36.34	36.66	35.58	37.31	35.07	35.43	36.34
7.05	36.16	34.62	35.59	35.44	36.01	34.71	36.29	36.64	35.51	37.31	35.23	35.57	35.83
7.06667	36.14	34.62	35.66	35.42	35.89	34.75	36.24	36.61	35.43	37.3	35.25	35.63	36.03
7.08333	36.12	34.63	35.88	35.49	35.63	34.64	36.18	36.67	35.36	37.24	35.28	35.64	36.42
7.1	36.1	34.87	36	35.57	35.58	34.33	36.13	36.67	35.27	37.22	35.22	35.6	36.46
7.11667	36.08	34.96	36.05	35.59	35.59	34.17	36.09	36.52	35.22	37.37	35.02	35.57	36.62
7.13333	36.08	34.99	36.07	35.57	35.75	34.06	36.07	36.35	35.19	37.41	34.76	35.63	36.69
7.15	36.09	34.87	36.07	35.56	35.84	34.03	36.03	36.3	35.19	37.34	34.77	35.63	36.7
7.16667	36.09	34.57	36.07	35.52	35.8	34.03	35.97	36.25	35.2	37.19	34.91	35.53	36.65
7.18333	36.07	34.38	36.06	35.42	35.82	34.02	35.89	36.15	35.2	36.99	35.02	35.5	36.53
7.2	36.06	34.34	36.02	35.51	35.67	33.99	35.82	36.12	35.2	36.88	35.08	35.54	36.32
7.21667	36.05	34.32	36.01	35.81	35.69	33.94	35.75	36.17	35.22	36.72	35.3	35.62	36.07
7.23333	36.04	34.34	36.02	35.68	36.23	33.89	35.69	36.17	35.2	36.66	35.42	35.68	35.87
7.25	36.03	34.54	36.02	35.51	36.15	33.85	35.62	36.14	35.14	36.63	35.5	35.7	35.83
7.26667	36.01	34.71	36.02	35.53	36	33.8	35.56	36.09	35.15	36.59	35.52	35.7	35.98
7.28333	36	34.8	36.06	35.58	36.29	33.81	35.49	36.04	35.1	36.57	35.48	35.71	35.98
7.3	36.02	34.83	36.07	36.04	36.38	33.84	35.45	36.03	34.93	36.44	35.32	35.72	35.94
7.31667	36.04	34.82	36.07	36.48	36.42	33.95	35.39	36.02	35.01	36.27	35.25	35.74	35.95
7.33333	36.05	34.77	36.07	36.59	36.43	34.38	35.34	35.98	35.04	36.12	35.25	35.75	35.92
7.35	36.03	34.71	36.03	36.64	36.44	34.53	35.28	35.9	34.98	36.02	35.24	35.75	35.66
7.36667	35.85	34.66	35.9	36.6	36.67	34.64	35.34	35.83	34.92	35.91	35.21	35.75	35.63
7.38333	35.54	34.6	35.81	36.45	36.72	34.87	35.39	35.76	34.96	35.74	35.17	35.75	35.67
7.4	35.57	34.55	35.8	36.33	36.51	34.83	35.36	35.69	35.21	35.67	35.03	35.77	35.65
7.41667	35.62	34.5	35.89	36.26	36.56	34.86	35.31	35.66	35.44	35.56	34.87	35.78	35.69
7.43333	35.73	34.45	35.91	36.23	36.68	35.3	35.24	35.67	35.74	35.46	34.81	35.78	35.77
7.45	35.77	34.39	35.92	36.24	36.84	35.63	35.18	35.69	35.79	35.4	34.76	35.78	35.81
7.46667	35.77	34.34	35.91	36.25	36.88	35.65	35.13	35.69	35.88	35.32	34.75	35.78	35.84
7.48333	35.76	34.29	35.88	36.26	36.95	35.69	35.09	35.69	36.03	35.38	34.74	35.73	35.84
7.5	35.73	34.24	35.87	36.21	37.23	35.67	35.07	35.69	36.1	35.49	34.72	35.69	35.86
7.51667	35.73	34.21	35.87	36.15	37.25	35.39	35.05	35.67	36.14	35.62	34.71	35.68	35.88
7.53333	35.71	34.18	35.87	36.12	37.2	34.79	35.05	35.71	36.15	35.75	34.73	35.68	35.89
7.55	35.66	34.14	35.87	36.11	37.26	34.43	35.04	35.86	36.17	35.83	34.82	35.7	35.91
7.56667	35.6	34.17	35.85	36.1	37.42	34.34	35.05	35.87	36.02	35.87	34.91	35.7	35.91
7.58333	35.62	34.67	35.81	36.09	37.39	34.74	35.08	35.87	35.82	35.9	34.98	35.59	35.9
7.6	35.63	34.81	35.71	36.08	37.26	34.63	35.07	35.85	35.77	36.01	35.05	35.36	35.88
7.61667	35.53	34.92	35.65	36.02	37.25	33.74	35.05	35.67	35.73	36.1	35.13	35.35	35.82
7.63333	35.51	34.99	35.61	35.95	37.22	33.73	34.99	35.71	35.68	36.19	35.16	35.31	35.81
7.65	35.48	35.01	35.57	35.88	37.07	33.74	34.98	35.83	35.63	36.24	35.18	35.28	35.83
7.66667	35.43	35.03	35.56	35.82	37.1	33.72	34.98	36.02	35.6	36.23	35.19	35.32	35.85
7.68333	35.41	35.04	35.58	35.76	37.33	33.69	34.97	36.08	35.64	36.24	35.23	35.35	35.9
7.7	35.48	35.04	35.62	35.72	37.31	33.61	34.95	36.06	35.69	36.27	35.23	35.31	36.03
7.71667	35.54	35.04	35.65	35.71	37.16	33.58	34.94	36.22	35.67	36.25	35.18	35.29	36.05
7.73333	35.54	35.16	35.65	35.7	37.08	33.56	34.95	36.56	35.52	36.23	35.09	35.19	35.93
7.75	35.79	35.41	35.65	35.66	36.88	33.45	34.96	36.62	35.57	36.19	35.04	35.2	35.8
7.76667	36.05	35.46	35.65	35.69	36.74	33.41	34.96	36.68	35.7	36.07	35.13	35.23	36.03
7.78333	36.22	35.44	35.63	35.72	36.72	33.42	34.96	36.85	35.73	35.98	35.22	35.2	36.08
7.8	36.26	35.19	35.63	35.85	36.71	33.52	34.95	36.97	35.79	35.95	35.3	35.07	36.05
7.81667	36.27	34.98	35.63	36.01	36.68	33.82	34.95	36.87	35.83	35.96	35.39	34.84	35.92
7.83333	36.32	35.16	35.61	36.11	36.67	33.81	34.98	36.63	35.85	35.92	35.21	34.8	35.91
7.85	36.36	35.55	35.59	36.27	36.72	33.65	34.98	36.7	35.87	35.77	34.91	34.82	35.93
7.86667	36.36	35.67	35.58	36.38	36.72	33.52	35	36.79	35.95	35.73	34.94	34.76	35.94
7.88333	36.35	35.61	35.57	36.47	36.69	33.53	35	36.85	36.04	35.69	35.1	34.72	35.91
7.9	36.32	35.52	35.54	36.48	36.7	33.6	34.98	36.85	36.29	35.65	35.14	34.72	35.89
7.91667	36.27	35.6	35.51	36.46	36.82	33.62	34.99	36.77	36.62	35.63	35.13	34.77	35.93
7.93333	36.21	35.72	35.47	36.46	36.83	33.56	35.05	36.87	36.73	35.59	35.09	34.98	35.91
7.95	36.13	35.83	35.44	36.47	36.89	33.49	35.06	36.94	36.74	35.57	35.18	35.12	35.84
7.96667	36.05	35.82	35.38	36.46	36.94	33.79	35.07	36.82	36.73	35.56	35.39	35.23	36.15
7.98333	35.99	35.78	35.33	36.44	36.93	34.6	35.08	36.77	36.65	35.55	35.54	35.25	36.26
8	35.94	35.75	35.13	36.41	36.91	34.93	35.09	36.76	36.6	35.55	35.65	35.17	36.28

## Sheet: Tg(Myh11-CreERT2) Warm
Time	Tg(Myh11-CreERT2)	Tg(Myh11-CreERT2)	Tg(Myh11-CreERT2)	Tg(Myh11-CreERT2)	Tg(Myh11-CreERT2)	Tg(Myh11-CreERT2)	Tg(Myh11-CreERT2);Trpv1fl/fl	Tg(Myh11-CreERT2);Trpv1fl/fl	Tg(Myh11-CreERT2);Trpv1fl/fl	Tg(Myh11-CreERT2);Trpv1fl/fl	Tg(Myh11-CreERT2);Trpv1fl/fl	Tg(Myh11-CreERT2);Trpv1fl/fl
	S161	S562	T467	T469	T751	U288	S164	S166	S640	T502	T506	T896
-1	35.34	35.7	34.76	34.52	39.4	35.76	34.62	35.82	34.56	35.21	35.47	36.18
-0.98333	35.36	35.66	34.78	34.51	39.38	35.72	34.54	35.89	34.56	35.1	35.45	36.18
-0.96667	35.37	35.65	34.78	34.53	39.35	35.75	34.47	35.96	34.62	35.09	35.47	36.17
-0.95	35.36	35.69	34.73	34.53	39.31	35.77	34.39	36.02	34.7	35.16	35.53	36.15
-0.93333	35.34	35.69	34.65	34.52	39.26	35.77	34.4	36.02	34.77	35.23	35.62	36.12
-0.91667	35.36	35.63	34.54	34.54	39.21	35.78	34.45	36	34.8	35.3	35.69	36.11
-0.9	35.36	35.55	34.43	34.79	39.2	35.77	34.46	35.99	34.79	35.38	35.76	36.12
-0.88333	35.35	35.52	34.37	34.97	39.27	35.76	34.49	35.96	34.7	35.41	35.76	36.1
-0.86667	35.3	35.48	34.34	35.19	39.28	35.75	34.51	35.92	34.8	35.44	35.8	36.07
-0.85	35.23	35.44	34.39	35.36	39.25	35.75	34.51	35.91	35.23	35.46	35.81	36.01
-0.83333	35.17	35.4	34.47	35.46	39.21	35.75	34.51	35.86	35.52	35.48	35.85	35.96
-0.81667	35.11	35.4	34.58	35.54	39.2	35.76	34.51	35.81	35.72	35.72	35.97	35.91
-0.8	35.09	35.4	34.82	35.75	39.25	35.77	34.51	35.82	35.77	35.87	36.08	35.86
-0.78333	35.07	35.4	34.95	35.79	39.34	35.8	34.5	35.81	35.8	35.9	36.11	35.81
-0.76667	35.06	35.4	34.98	35.51	39.41	35.8	34.58	35.81	35.83	35.89	36.16	35.77
-0.75	35.04	35.44	34.95	35.26	39.5	35.8	34.88	35.81	35.88	35.88	36.2	35.76
-0.73333	35.03	35.51	34.85	35.23	39.59	35.8	35.1	35.8	35.97	35.85	36.2	35.78
-0.71667	35.03	35.57	34.71	35.19	39.62	35.8	35.2	35.79	36.04	35.83	36.2	35.77
-0.7	35.03	35.63	34.86	35.19	39.63	35.83	35.18	35.79	36.1	35.77	36.18	35.79
-0.68333	35.07	35.66	35.15	35.25	39.63	35.86	35.32	35.83	36.13	35.51	36.23	35.78
-0.66667	35.12	35.69	35.18	35.25	39.6	35.86	35.38	35.84	36.15	34.93	36.24	35.77
-0.65	35.09	35.7	35.32	35.33	39.55	35.87	35.4	35.85	36.16	34.79	36.22	35.8
-0.63333	35.07	35.66	35.71	35.38	39.5	35.92	35.41	35.86	36.21	34.98	36.23	35.8
-0.61667	35.04	35.6	35.8	35.42	39.43	35.97	35.42	35.85	36.22	35.17	36.21	35.75
-0.6	35.02	35.57	35.88	35.44	39.35	36.01	35.41	35.82	36.13	35.24	36.03	35.69
-0.58333	34.99	35.59	35.94	35.39	39.33	36.04	35.4	35.79	36.13	35.28	35.89	35.65
-0.56667	34.98	35.68	36.06	35.21	39.33	36.04	35.41	35.76	36.18	35.37	35.87	35.61
-0.55	34.97	35.68	36.07	34.99	39.3	36.05	35.45	35.75	36.14	35.33	35.95	35.57
-0.53333	34.95	35.63	36.03	35.14	39.28	36.05	35.45	35.72	35.97	35.28	35.99	35.46
-0.51667	34.94	35.59	35.95	35.24	39.29	36.02	35.44	35.68	35.85	35.39	35.99	35.36
-0.5	34.94	35.56	35.83	35.29	39.29	35.76	35.41	35.67	36.11	35.46	35.95	35.34
-0.48333	34.96	35.53	35.74	35.31	39.25	35.58	35.37	35.66	36.16	35.46	35.91	35.38
-0.46667	35.05	35.5	35.44	35.32	39.19	35.56	35.31	35.69	36.15	35.45	35.86	35.55
-0.45	35.1	35.48	35.42	35.49	39.12	36	35.32	35.74	36.22	35.41	35.81	35.68
-0.43333	35.13	35.48	35.61	35.47	39.15	36.02	35.33	35.86	36.34	35.41	35.76	35.69
-0.41667	35.13	35.49	35.64	35.32	39.21	35.97	35.33	35.94	36.42	35.45	35.72	35.7
-0.4	35.11	35.57	35.64	35.17	39.27	36.3	35.32	36.07	36.45	35.5	35.67	35.84
-0.38333	35.09	35.7	35.59	35.02	39.3	36.62	35.31	36.11	36.46	35.54	35.59	35.89
-0.36667	35.08	35.79	35.51	34.9	39.29	36.63	35.27	36.1	36.45	35.55	35.52	35.88
-0.35	35.08	35.86	35.46	34.81	39.26	36.54	35.23	36.07	36.4	35.57	35.51	35.86
-0.33333	35.12	35.93	35.41	34.76	39.27	36.49	35.2	36.05	36.32	35.57	35.56	35.83
-0.31667	35.16	35.92	35.34	34.75	39.3	36.52	35.17	36	36.24	35.55	35.61	35.82
-0.3	35.18	35.88	35.26	34.7	39.31	36.71	35.23	35.96	36.18	35.51	35.63	35.78
-0.28333	35.21	35.83	35.16	34.63	39.28	36.83	35.25	35.9	36.1	35.46	35.64	35.72
-0.26667	35.36	35.89	35.08	34.6	39.25	36.83	35.26	35.85	36.02	35.41	35.66	35.67
-0.25	35.48	35.93	34.98	34.55	39.21	36.83	35.25	35.81	35.98	35.39	35.69	35.63
-0.23333	35.55	35.94	34.89	34.49	39.13	36.8	35.25	35.8	35.93	35.35	35.83	35.59
-0.21667	35.56	35.94	34.86	34.48	39.05	36.73	35.22	35.82	35.88	35.25	35.89	35.59
-0.2	35.55	35.91	34.82	34.48	39.02	36.59	35.21	35.82	35.82	35.18	35.91	35.63
-0.18333	35.63	35.9	34.72	34.43	39.02	36.5	35.21	35.82	35.76	35.13	35.91	35.65
-0.16667	35.64	35.86	34.64	34.35	39.02	36.43	35.25	35.83	35.73	35.09	35.88	35.67
-0.15	35.49	35.86	34.6	34.26	39.02	36.37	35.31	35.84	35.7	35.07	35.86	35.69
-0.13333	35.46	35.86	34.59	34.22	39.08	36.33	35.35	35.88	35.65	35.25	35.83	35.71
-0.11667	35.46	35.83	34.57	34.17	39.17	36.38	35.36	35.88	35.6	35.27	35.79	35.74
-0.1	35.46	35.81	34.56	34.13	39.22	36.4	35.36	35.87	35.54	35.26	35.8	35.71
-0.08333	35.42	35.8	34.57	34.07	39.23	36.32	35.38	35.87	35.45	35.27	35.89	35.64
-0.06667	35.37	35.77	34.57	34.02	39.21	36.27	35.38	35.86	35.43	35.27	35.89	35.59
-0.05	35.3	35.78	34.56	34.02	39.17	36.22	35.32	35.87	35.38	35.26	35.84	35.58
-0.03333	35.24	35.91	34.54	34.02	39.14	36.16	35.29	35.87	35.32	35.23	35.8	35.56
-0.01667	35.22	35.97	34.52	34.05	39.07	36.11	35.36	35.87	35.29	35.2	35.74	35.47
0	35.19	36	34.5	34.15	38.92	36.05	35.42	35.9	35.24	35.19	35.76	35.37
0.016667	35.15	36.01	34.48	34.14	38.81	36	35.44	35.89	35.18	35.17	35.8	35.59
0.033333	35.14	36.02	34.47	34.1	39.07	35.92	35.43	35.88	35.11	35.16	35.78	35.73
0.05	35.13	36.05	34.44	34.09	39.24	35.84	35.37	35.98	35.05	35.2	35.73	35.75
0.066667	35.13	36.09	34.45	34.17	39.61	35.77	35.32	36.03	34.97	35.21	35.77	35.7
0.083333	35.12	36.1	34.48	34.22	40.04	35.73	35.28	36.02	34.94	35.21	35.98	35.61
0.1	35.1	36.1	34.51	34.25	40.17	35.73	35.25	35.99	34.94	35.19	36	35.58
0.116667	35.07	36.1	34.55	34.5	40.18	35.79	35.4	36.09	34.94	35.16	35.92	35.86
0.133333	35.1	36.09	34.55	34.79	40.34	35.79	35.55	36.4	34.94	35.12	35.87	36.13
0.15	35.13	36.03	34.55	35.05	40.7	35.77	35.61	36.63	35	35.07	35.84	36.21
0.166667	35.15	35.8	34.58	35.38	40.72	35.81	35.62	36.77	35.06	35.04	35.79	36.32
0.183333	35.15	35.64	34.74	35.6	40.68	35.83	35.48	36.84	35.13	35	35.76	36.35
0.2	35.16	35.65	34.85	35.82	40.58	35.84	35.33	36.93	35.22	34.97	35.76	36.35
0.216667	35.17	35.67	34.93	36.01	40.6	35.84	35.31	37.01	35.26	34.93	35.73	36.42
0.233333	35.17	35.73	35.1	36.17	40.65	35.82	35.31	37.02	35.29	34.88	35.7	36.62
0.25	35.17	35.82	35.46	36.24	40.79	35.77	35.31	37.09	35.45	34.86	35.69	36.72
0.266667	35.16	35.86	35.72	36.26	40.83	35.72	35.33	37.15	35.7	34.86	35.63	36.84
0.283333	35.16	35.87	35.83	36.34	40.84	35.62	35.35	37.13	35.97	34.86	35.57	36.93
0.3	35.16	35.86	36.07	36.42	40.86	35.48	35.35	37.07	36.19	34.86	35.54	36.98
0.316667	35.16	35.86	36.3	36.5	40.89	35.39	35.36	37.08	36.44	34.91	35.52	36.99
0.333333	35.18	35.9	36.53	36.61	40.9	35.62	35.37	37.08	36.65	34.99	35.55	36.98
0.35	35.2	35.95	36.71	36.77	40.9	35.88	35.39	37.04	36.73	35.04	35.56	37
0.366667	35.22	36.08	36.77	36.85	40.9	35.91	35.51	37.1	36.85	35.08	35.61	37.08
0.383333	35.29	36.28	36.83	36.93	40.91	35.79	35.61	37.24	37.01	35.11	35.65	37.22
0.4	35.34	36.43	36.89	36.94	40.9	35.9	35.71	37.35	37.19	35.16	35.68	37.26
0.416667	35.38	36.59	37.05	36.82	40.83	36.11	35.76	37.48	37.35	35.2	35.7	37.25
0.433333	35.5	36.66	37.19	36.6	40.8	36.44	35.79	37.57	37.49	35.25	35.71	37.24
0.45	35.55	36.65	37.33	36.58	40.77	36.55	35.83	37.67	37.53	35.3	35.73	37.23
0.466667	35.53	36.58	37.45	36.75	40.7	36.62	35.88	37.75	37.56	35.35	35.74	37.18
0.483333	35.51	36.62	37.47	36.85	40.59	36.6	35.92	37.77	37.59	35.41	35.75	37.14
0.5	35.32	36.61	37.37	36.92	40.61	36.48	35.97	37.73	37.57	35.48	35.75	37.1
0.516667	35.35	36.68	37.34	37.16	40.71	36.44	36.03	37.71	37.41	35.53	35.75	37.07
0.533333	35.56	36.72	37.44	37.23	40.85	36.63	36.11	37.68	37.38	35.6	35.75	37.05
0.55	35.67	36.62	37.43	37.21	40.86	36.78	36.17	37.61	37.39	35.67	35.74	37.03
0.566667	35.91	36.41	37.47	37.16	40.7	36.96	36.24	37.57	37.63	35.74	35.75	36.94
0.583333	36.49	36.34	37.47	37.16	40.67	37.01	36.3	37.54	37.79	35.84	35.8	36.94
0.6	36.77	36.29	37.5	37.03	40.81	37.18	36.37	37.49	37.86	35.92	35.85	36.95
0.616667	36.7	36.27	37.56	36.95	40.89	37.38	36.44	37.49	37.9	35.99	35.87	36.96
0.633333	36.55	36.22	37.63	37.04	40.95	37.41	36.51	37.52	37.96	36.07	35.89	36.95
0.65	36.5	36.09	37.67	37.11	41.07	37.43	36.56	37.49	37.97	36.17	35.93	36.94
0.666667	36.49	36.09	37.7	37.06	41.12	37.46	36.64	37.43	37.95	36.27	35.95	36.95
0.683333	36.58	36.19	37.87	36.93	41.2	37.47	36.72	37.39	37.94	36.37	35.97	36.98
0.7	36.66	36.26	38	36.84	41.21	37.44	36.72	37.32	37.87	36.46	36.02	37
0.716667	36.8	36.38	38.05	36.77	41.13	37.39	36.75	37.25	37.91	36.53	36.07	36.94
0.733333	37	36.49	38.05	36.71	41.07	37.52	36.76	37.18	37.96	36.59	36.1	36.83
0.75	37.07	36.65	38.03	36.65	41.05	37.54	36.7	37.14	38.03	36.6	36.15	36.78
0.766667	37.18	36.72	38.03	36.6	41.02	37.51	36.74	37.11	38.06	36.61	36.22	36.77
0.783333	37.22	36.75	37.99	36.56	40.97	37.48	36.94	37.09	38.08	36.69	36.31	36.77
0.8	37.24	36.82	37.96	36.52	41.03	37.34	37.02	37.09	38.1	36.81	36.35	36.79
0.816667	37.25	36.86	38.07	36.48	41.04	37.29	37.11	37.07	38.21	36.87	36.38	36.81
0.833333	37.25	36.92	38.09	36.45	41.02	37.35	37.12	37.05	38.23	36.98	36.44	36.85
0.85	37.25	37.49	38.08	36.44	41.05	37.35	37.12	37.02	38.16	37.18	36.54	36.88
0.866667	37.21	37.6	38.05	36.43	41.1	37.35	37.13	37	38.08	37.32	36.57	36.9
0.883333	37.17	37.62	38.03	36.43	41.11	37.38	37.13	36.99	38.02	37.45	36.59	36.93
0.9	37.3	37.62	38.01	36.43	41.07	37.41	37.41	36.99	38.13	37.54	36.6	36.97
0.916667	37.41	37.62	37.99	36.44	40.99	37.4	37.49	37	38.14	37.63	36.59	36.98
0.933333	37.53	37.61	37.93	36.47	40.94	37.4	37.52	37.01	38.12	37.76	36.6	36.96
0.95	37.65	37.39	37.93	36.49	40.92	37.42	37.54	36.99	38.05	37.76	36.72	36.97
0.966667	37.66	37.04	37.95	36.49	40.91	37.45	37.64	36.81	38	37.75	36.83	36.96
0.983333	37.65	36.79	37.96	36.51	40.95	37.49	37.68	36.64	38	37.76	36.94	36.98
1	37.64	37.19	38	36.53	40.96	37.49	37.66	36.61	38	37.75	36.98	37.02
1.01667	37.62	37.38	38.07	36.55	40.86	37.47	37.64	36.61	38	37.75	37.02	37.02
1.03333	37.6	37.34	38.08	36.57	40.82	37.58	37.63	36.58	38.01	37.74	37.09	37.03
1.05	37.6	37.17	38.08	36.6	40.84	37.63	37.64	36.57	38.04	37.72	37.17	37.07
1.06667	37.59	37.33	38.08	36.64	40.87	37.62	37.65	36.74	38.06	37.74	37.23	37.1
1.08333	37.57	37.51	38.01	36.72	40.88	37.51	37.6	36.86	38.07	37.81	37.26	37.13
1.1	37.45	37.55	37.98	36.86	40.85	37.41	37.55	36.86	38.07	37.82	37.32	37.16
1.11667	37.3	37.33	37.96	36.99	40.81	37.36	37.53	36.87	38.11	37.79	37.34	37.19
1.13333	37.28	37.23	37.85	37.02	40.83	37.36	37.52	36.88	38.16	37.74	37.37	37.23
1.15	37.29	37.35	37.83	37.09	40.84	37.36	37.51	36.87	38.21	37.66	37.37	37.3
1.16667	37.18	37.69	37.83	37.15	40.77	37.36	37.48	36.91	38.24	37.66	37.36	37.36
1.18333	37.12	37.79	37.83	37.21	40.65	37.38	37.44	37	38.32	37.69	37.38	37.41
1.2	37.14	37.89	37.88	37.28	40.64	37.4	37.42	37.03	38.4	37.7	37.4	37.45
1.21667	37.18	38.01	37.94	37.32	40.65	37.36	37.45	37.04	38.47	37.7	37.45	37.5
1.23333	37.17	38.06	37.95	37.36	40.68	37.23	37.46	37.12	38.54	37.72	37.49	37.51
1.25	37.06	38.04	38	37.39	40.74	37.18	37.42	37.24	38.53	37.73	37.51	37.53
1.26667	36.99	37.93	38.01	37.39	40.77	37.19	37.36	37.28	38.4	37.75	37.51	37.56
1.28333	36.98	37.91	38.02	37.32	40.77	37.21	37.36	37.25	38.35	37.79	37.54	37.6
1.3	36.98	37.91	38.1	37.28	40.74	37.23	37.36	37.26	38.31	37.81	37.59	37.64
1.31667	37.03	37.94	38.11	37.32	40.76	37.25	37.32	37.31	38.35	37.84	37.61	37.66
1.33333	37.07	37.94	38.11	37.36	40.81	37.28	37.3	37.35	38.44	37.87	37.6	37.7
1.35	37.09	37.93	38.15	37.43	40.85	37.32	37.3	37.36	38.47	37.85	37.58	37.75
1.36667	37.1	37.92	38.2	37.54	40.87	37.34	37.31	37.38	38.48	37.84	37.6	37.77
1.38333	37.14	37.93	38.2	37.57		37.36	37.35	37.45	38.48	37.87	37.63	37.77
1.4	37.18	37.94	38.2	37.56		37.4	37.43	37.47	38.48	37.89	37.65	37.78
1.41667	37.21	37.9	38.22	37.5		37.41	37.44	37.46	38.48	37.91	37.68	37.81
1.43333	37.37	37.89	38.25	37.48	41.03	37.43	37.43	37.45	38.49	37.97	37.67	37.85
1.45	37.57	37.89	38.3	37.51	41	37.48	37.43	37.46	38.48	37.98	37.65	37.88
1.46667	37.78	37.91	38.35	37.57	40.99	37.49	37.46	37.48	38.39	37.99	37.67	37.93
1.48333	37.79	37.95	38.37	37.63	41.01	37.45	37.52	37.47	38.43	38.02	37.71	37.94
1.5	37.73	37.96	38.37	37.64	40.92	37.41	37.54	37.41	38.49	38.05	37.71	37.97
1.51667	37.73	37.95	38.34	37.65	40.88	37.41	37.54	37.38	38.53	38.09	37.69	38.03
1.53333	37.69	37.93	38.37	37.72	40.9	37.42	37.54	37.33	38.56	38.12	37.7	38.1
1.55	37.68	37.93	38.42	37.73	40.93	37.46	37.55	37.31	38.58	38.15	37.72	38.17
1.56667	37.69	37.94	38.43	37.73	40.96	37.49	37.54	37.43	38.57	38.16	37.74	38.26
1.58333	37.69	37.99	38.44	37.77	40.98	37.54	37.52	37.52	38.54	38.16	37.78	38.29
1.6	37.62	37.99	38.43	37.77	41.01	37.55	37.57	37.52	38.56	38.21	37.79	38.26
1.61667	37.65	37.99	38.41	37.78	41.12	37.54	37.62	37.46	38.55	38.29	37.79	38.17
1.63333	37.71	37.99	38.45	37.85	41.16	37.53	37.68	37.45	38.59	38.31	37.75	38.21
1.65	37.77	38.02	38.5	37.88	41.24	37.54	37.75	37.45	38.64	38.32	37.8	38.28
1.66667	37.87	38.04	38.53	37.88	41.32	37.57	37.81	37.42	38.66	38.34	37.88	38.29
1.68333	37.99	38.03	38.51	37.91	41.45	37.65	37.82	37.4	38.71	38.42	37.93	38.31
1.7	38	38.03	38.55	37.91	41.56	37.7	37.81	37.44	38.76	38.49	37.99	38.38
1.71667	37.89	38.05	38.62	37.9	41.57	37.74	37.85	37.48	38.81	38.51	38.04	38.43
1.73333	37.85	38.09	38.66	38	41.5	37.75	37.92	37.51	38.89	38.5	38.08	38.46
1.75	37.86	38.12	38.68	38.03	41.51	37.76	37.94	37.54	38.92	38.51	38.12	38.47
1.76667	37.88	38.12	38.72	38.03	41.63	37.78	37.97	37.55	38.97	38.53	38.15	38.53
1.78333	37.97	38.14	38.73	38.07	41.68	37.8	38	37.48	39.02	38.53	38.16	38.61
1.8	38.14	38.15	38.76	38.13	41.67	37.82	38.02	37.33	39.03	38.53	38.18	38.66
1.81667	38.17	38.17	38.82	38.18	41.63	37.84	38.03	37.22	39.01	38.59	38.2	38.71
1.83333	38.08	38.23	38.91	38.18	41.64	37.85	37.99	37.16	38.99	38.63	38.22	38.76
1.85	38.07	38.24	38.97	38.17	41.68	37.84	37.96	37.17	38.99	38.63	38.22	38.8
1.86667	38.14	38.24	38.96	38.18	41.68	37.81	37.94	37.2	39.02	38.57	38.21	38.81
1.88333	38.21	38.24	38.9	38.2	41.7	37.81	37.94	37.25	39.05	38.56	38.21	38.82
1.9	38.2	38.26	38.86	38.23	41.72	37.84	37.99	37.28	39.06	38.6	38.31	38.84
1.91667	38.21	38.27	38.88	38.29	41.73	37.82	38.09	37.31	39.07	38.62	38.35	38.89
1.93333	38.2	38.33	38.95	38.33	41.75	37.75	38.12	37.34	39.08	38.62	38.34	38.91
1.95	38.21	38.38	39	38.39	41.81	37.75	38.13	37.35	39.08	38.69	38.33	38.92
1.96667	38.25	38.42	39.06	38.42	41.83	37.82	38.18	37.24	39.08	38.72	38.4	38.96
1.98333	38.19	38.46	39.14	38.41	41.82	37.88	38.22	37.13	39.08	38.72	38.45	39
2	38.14	38.47	39.19	38.39	41.81	37.89	38.27	37.1	39.1	38.74	38.43	39.03
2.01667	38.18	38.46	39.19	38.41	41.85	37.88	38.31	37.11	39.16	38.74	38.41	38.99
2.03333	38.29	38.46	39.16	38.44	41.89	37.93	38.34	37.18	39.17	38.74	38.44	38.97
2.05	38.32	38.54	39.18	38.49	41.93	38.02	38.32	37.16	39.16	38.78	38.48	39.06
2.06667	38.38	38.59	39.22	38.52	42	38.06	38.26	37.09	39.14	38.81	38.5	39.12
2.08333	38.47	38.6	39.24	38.56	42.03	38.09	38.29	37.09	39.14	38.84	38.52	39.13
2.1	38.52	38.6	39.25	38.58	42.07	38.12	38.31	37.15	39.12	38.84	38.54	39.07
2.11667	38.55	38.61	39.28	38.57	42.08	38.15	38.32	37.21	39.09	38.85	38.56	39.08
2.13333	38.48	38.62	39.3	38.52	42.07	38.15	38.32	37.24	39.08	38.87	38.58	39.15
2.15	38.44	38.64	39.33	38.45	42.05	38.15	38.37	37.18	39.08	38.89	38.59	39.21
2.16667	38.46	38.7	39.37	38.45	42.13	38.14	38.4	37.13	39.1	38.92	38.58	39.27
2.18333	38.49	38.69	39.36	38.48	42.15	38.14	38.43	37.17	39.1	38.91	38.57	39.28
2.2	38.54	38.68	39.35	38.49	42.14	38.19	38.42	37.23	39.09	38.89	38.63	39.27
2.21667	38.6	38.68	39.37	38.49	42.16	38.24	38.38	37.27	39.09	38.93	38.67	39.26
2.23333	38.63	38.71	39.36	38.43	42.2	38.26	38.39	37.27	39.1	38.91	38.66	39.28
2.25	38.69	38.76	39.36	38.39	42.35	38.25	38.45	37.26	39.09	38.87	38.63	39.35
2.26667	38.72	38.83	39.38	38.39	42.41	38.18	38.5	37.26	39.09	38.85	38.65	39.35
2.28333	38.73	38.89	39.37	38.4	42.41	38.16	38.56	37.23	39.12	38.72	38.68	39.31
2.3	38.56	38.9	39.38	38.42	42.37	38.2	38.6	37.21	39.16	38.73	38.71	39.31
2.31667	38.47	38.89	39.49	38.45	42.31	38.21	38.57	37.2	39.2	38.89	38.72	39.31
2.33333	38.57	38.87	39.52	38.48	42.28	38.2	38.5	37.18	39.22	38.94	38.74	39.31
2.35	38.59	38.86	39.54	38.49	42.27	38.22	38.5	37.18	39.22	38.97	38.77	39.35
2.36667	38.6	38.85	39.55	38.44	42.32	38.26	38.51	37.22	39.26	38.96	38.78	39.39
2.38333	38.66	38.85	39.56	38.42	42.34	38.28	38.48	37.31	39.28	38.92	38.8	39.4
2.4	38.68	38.83	39.57	38.42	42.29	38.32	38.36	37.37	39.25	38.9	38.82	39.44
2.41667	38.6	38.81	39.58	38.41	42.26	38.35	38.35	37.42	39.23	38.87	38.82	39.45
2.43333	38.61	38.81	39.55	38.37	42.26	38.34	38.41	37.44	39.29	38.92	38.79	39.48
2.45	38.73	38.9	39.46	38.31	42.22	38.32	38.44	37.39	39.36	38.98	38.75	39.53
2.46667	38.72	38.92	39.47	38.34	42.21	38.34	38.45	37.35	39.42	38.99	38.8	39.51
2.48333	38.71	38.91	39.53	38.41	42.21	38.38	38.5	37.36	39.45	39	38.86	39.51
2.5	38.74	38.88	39.58	38.48	42.18	38.43	38.57	37.37	39.45	39.02	38.91	39.53
2.51667	38.77	38.93	39.58	38.59	42.18	38.44	38.57	37.39	39.42	39.05	38.93	39.54
2.53333	38.75	38.97	39.54	38.59	42.2	38.45	38.56	37.4	39.41	39.09	38.92	39.53
2.55	38.64	38.96	39.52	38.56	42.21	38.45	38.68	37.38	39.41	39.06	38.94	39.54
2.56667	38.61	38.95	39.52	38.57	42.25	38.45	38.76	37.35	39.41	39.02	38.97	39.61
2.58333	38.64	39	39.54	38.56	42.31	38.46	38.76	37.33	39.41	39.04	38.99	39.62
2.6	38.64	39.02	39.55	38.55	42.32	38.5	38.71	37.34	39.41	39.06	39.01	39.57
2.61667	38.6	39.03	39.6	38.57	42.37	38.53	38.71	37.36	39.42	39.04	39.03	39.5
2.63333	38.61	38.98	39.63	38.57	42.39	38.57	38.75	37.42	39.42	39	39.06	39.49
2.65	38.65	39.02	39.64	38.5	42.39	38.6	38.79	37.46	39.4	39.02	39.09	39.52
2.66667	38.67	39.08	39.67	38.45	42.37	38.6	38.79	37.51	39.32	39.13	39.11	39.53
2.68333	38.7	39.08	39.72	38.46	42.41	38.6	38.75	37.59	39.31	39.17	39.14	39.52
2.7	38.69	39.08	39.78	38.54	42.41	38.6	38.68	37.6	39.27	39.18	39.18	39.55
2.71667	38.71	39.07	39.81	38.56	42.38	38.63	38.63	37.6	39.27	39.15	39.18	39.55
2.73333	38.83	39.07	39.85	38.56	42.38	38.63	38.63	37.58	39.28	39.14	39.18	39.55
2.75	38.9	39.07	39.86	38.58	42.37	38.66	38.63	37.57	39.3	39.14	39.18	39.54
2.76667	38.92	39.08	39.83	38.59	42.37	38.7	38.61	37.57	39.32	39.11	39.16	39.52
2.78333	38.95	39.16	39.82	38.59	42.4	38.74	38.55	37.52	39.4	39.08	39.2	39.57
2.8	38.97	39.2	39.85	38.63	42.39	38.78	38.62	37.52	39.47	39.16	39.21	39.6
2.81667	38.96	39.21	39.94	38.73	42.41	38.78	38.64	37.56	39.5	39.15	39.2	39.62
2.83333	38.87	39.24	40.02	38.74	42.43	38.77	38.64	37.56	39.48	39.11	39.23	39.62
2.85	38.84	39.26	40.06	38.73	42.44	38.78	38.64	37.53	39.46	39.13	39.25	39.63
2.86667	38.88	39.31	40.07	38.73	42.41	38.79	38.66	37.46	39.44	39.18	39.28	39.63
2.88333	38.92	39.3	40.04	38.73	42.4	38.81	38.69	37.41	39.43	39.19	39.29	39.61
2.9	38.96	39.23	39.97	38.72	42.42	38.81	38.69	37.39	39.43	39.15	39.32	39.6
2.91667	38.96	39.18	39.93	38.74	42.49	38.8	38.71	37.39	39.43	39.14	39.35	39.6
2.93333	38.94	39.12	39.97	38.77	42.52	38.83	38.82	37.34	39.38	39.22	39.36	39.56
2.95	38.92	39.15	40.12	38.76	42.54	38.88	38.86	37.27	39.37	39.25	39.37	39.58
2.96667	38.93	39.23	40.22	38.71	42.55	38.89	38.86	37.26	39.39	39.25	39.37	39.61
2.98333	38.96	39.24	40.3	38.66	42.57	38.9	38.84	37.27	39.39	39.22	39.34	39.6
3	38.99	39.16	40.32	38.65	42.63	38.93	38.84	37.26	39.39	39.16	39.32	39.59
3.01667	38.98	39.13	40.21	38.7	42.64	38.96	38.87	37.26	39.42	39.13	39.27	39.59
3.03333	38.96	39.13	40.14	38.72	42.62	39.03	38.91	37.26	39.47	39.19	39.26	39.59
3.05	38.98	39.13	40.1	38.77	42.68	39.06	38.94	37.27	39.48	39.25	39.3	39.59
3.06667	38.98	39.15	40.07	38.81	42.75	39.08	38.95	37.27	39.43	39.26	39.35	39.59
3.08333	38.96	39.2	40.05	38.85	42.76	39.14	38.95	37.25	39.4	39.25	39.36	39.59
3.1	38.88	39.21	40.13	38.9	42.77	39.18	38.92	37.22	39.43	39.28	39.35	39.6
3.11667	38.87	39.22	40.16	38.9	42.78	39.2	38.9	37.21	39.46	39.32	39.36	39.64
3.13333	38.9	39.2	40.16	38.91	42.76	39.19	38.9	37.21	39.46	39.32	39.39	39.64
3.15	38.92	39.15	40.17	38.91	42.7	39.18	38.84	37.22	39.45	39.28	39.4	39.62
3.16667	38.94	39.25	40.24	38.89	42.7	39.21	38.81	37.29	39.45	39.25	39.4	39.63
3.18333	39	39.3	40.24	38.9	42.77	39.25	38.83	37.32	39.45	39.24	39.38	39.62
3.2	38.98	39.3	40.25	38.92	42.84	39.27	38.84	37.33	39.44	39.23	39.38	39.59
3.21667	38.99	39.24	40.23	38.94	42.84	39.28	38.8	37.27	39.41	39.2	39.42	39.57
3.23333	39.03	39.2	40.23	38.99	42.81	39.28	38.72	37.18	39.4	39.22	39.45	39.54
3.25	39.06	39.12	40.28	38.94	42.76	39.3	38.73	37.23	39.4	39.27	39.45	39.53
3.26667	39.04	39.16	40.3	38.83	42.72	39.32	38.7	37.31	39.4	39.24	39.42	39.54
3.28333	38.99	39.2	40.28	38.81	42.69	39.36	38.71	37.45	39.44	39.22	39.42	39.62
3.3	38.99	39.24	40.29	38.82	42.73	39.39	38.75	37.53	39.45	39.26	39.42	39.64
3.31667	39	39.22	40.36	38.77	42.78	39.38	38.78	37.54	39.45	39.23	39.43	39.63
3.33333	39.04	39.13	40.4	38.7	42.79	39.35	38.76	37.55	39.43	39.23	39.42	39.62
3.35	39.07	39.08	40.38	38.71	42.77	39.35	38.77	37.58	39.49	39.34	39.42	39.57
3.36667	39.15	39.06	40.39	38.77	42.77	39.34	38.87	37.59	39.55	39.38	39.47	39.57
3.38333	39.17	39.15	40.41	38.76	42.73	39.35	38.91	37.61	39.57	39.38	39.48	39.59
3.4	39.1	39.16	40.39	38.74	42.68	39.38	38.92	37.63	39.52	39.37	39.46	39.57
3.41667	39.11	39.19	40.35	38.75	42.71	39.43	38.89	37.72	39.49	39.35	39.53	39.57
3.43333	39.13	39.23	40.32	38.77	42.72	39.44	38.92	37.78	39.46	39.31	39.56	39.57
3.45	39.12	39.3	40.29	38.75	42.75	39.38	39.02	37.81	39.46	39.26	39.51	39.57
3.46667	39.18	39.32	40.24	38.78	42.74	39.34	39.04	37.8	39.49	39.26	39.49	39.54
3.48333	39.19	39.32	40.19	38.8	42.71	39.37	39.07	37.76	39.5	39.29	39.51	39.56
3.5	39.16	39.32	40.22	38.83	42.73	39.39	39.06	37.75	39.48	39.32	39.55	39.57
3.51667	39.08	39.32	40.28	38.89	42.74	39.42	39	37.74	39.45	39.35	39.56	39.54
3.53333	39.08	39.31	40.28	38.89	42.77	39.46	39	37.7	39.41	39.36	39.52	39.55
3.55	39.11	39.3	40.27	38.97	42.83	39.46	39.06	37.67	39.41	39.33	39.46	39.58
3.56667	39.11	39.28	40.27	38.98	42.86	39.4	39.08	37.66	39.42	39.34	39.46	39.59
3.58333	39.12	39.28	40.29	38.89	42.86	39.38	39.06	37.64	39.46	39.35	39.45	39.59
3.6	39.18	39.3	40.3	38.87	42.83	39.37	39.05	37.58	39.47	39.35	39.44	39.55
3.61667	39.23	39.31	40.32	38.89	42.82	39.37	39.1	37.6	39.46	39.34	39.48	39.54
3.63333	39.3	39.27	40.32	38.87	42.82	39.43	39.1	37.7	39.46	39.41	39.55	39.56
3.65	39.38	39.23	40.34	38.96	42.86	39.47	39.1	37.77	39.47	39.48	39.56	39.59
3.66667	39.31	39.28	40.38	39.02	42.86	39.48	39.12	37.85	39.46	39.53	39.57	39.59
3.68333	39.26	39.29	40.41	39.03	42.84	39.51	39.09	37.89	39.39	39.54	39.58	39.59
3.7	39.29	39.22	40.43	39.04	42.84	39.54	39.02	37.9	39.37	39.55	39.54	39.56
3.71667	39.38	39.12	40.45	39	42.83	39.56	38.96	37.9	39.39	39.52	39.52	39.53
3.73333	39.39	39.12	40.45	38.96	42.77	39.51	38.99	37.91	39.42	39.45	39.54	39.52
3.75	39.35	39.27	40.44	38.97	42.76	39.46	39.03	37.9	39.43	39.37	39.59	39.55
3.76667	39.36	39.35	40.42	39.02	42.78	39.43	39.02	37.9	39.4	39.36	39.63	39.57
3.78333	39.4	39.36	40.41	39.03	42.82	39.45	39.05	37.91	39.36	39.4	39.65	39.57
3.8	39.43	39.29	40.44	39.04	42.86	39.46	39.07	37.92	39.35	39.42	39.67	39.56
3.81667	39.47	39.27	40.47	39.06	42.84	39.45	39.05	37.94	39.35	39.4	39.71	39.57
3.83333	39.49	39.28	40.47	39.09	42.81	39.46	39.07	37.95	39.33	39.39	39.75	39.58
3.85	39.49	39.29	40.4	39.08	42.82	39.49	39.1	37.95	39.33	39.43	39.76	39.56
3.86667	39.51	39.31	40.38	38.93	42.84	39.53	39.12	37.95	39.34	39.49	39.76	39.56
3.88333	39.55	39.32	40.37	38.94	42.85	39.57	39.13	37.95	39.37	39.49	39.74	39.56
3.9	39.52	39.27	40.35	39.02	42.83	39.6	39.23	37.94	39.43	39.51	39.69	39.57
3.91667	39.46	39.26	40.31	39.01	42.74	39.63	39.24	37.91	39.43	39.51	39.67	39.59
3.93333	39.43	39.27	40.36	38.97	42.75	39.64	39.21	37.99	39.43	39.49	39.66	39.59
3.95	39.41	39.3	40.38	39.01	42.76	39.64	39.22	38.07	39.39	39.48	39.68	39.57
3.96667	39.37	39.3	40.27	39.03	42.76	39.65	39.24	38.07	39.36	39.46	39.68	39.52
3.98333	39.3	39.3	40.25	39.02	42.75	39.64	39.26	38.03	39.36	39.44	39.67	39.5
4	39.31	39.32	40.3	38.94	42.73	39.61	39.26	38	39.37	39.45	39.67	39.51
4.01667	39.37	39.36	40.31	38.92	42.74	39.57	39.25	38.03	39.4	39.47	39.68	39.52
4.03333	39.37	39.41	40.29	38.97	42.78	39.48	39.21	37.97	39.4	39.47	39.67	39.53
4.05	39.38	39.47	40.38	38.99	42.77	39.5	39.21	37.88	39.38	39.45	39.66	39.53
4.06667	39.42	39.47	40.48	38.97	42.65	39.53	39.23	37.81	39.38	39.46	39.65	39.53
4.08333	39.43	39.45	40.51	38.87	42.43	39.54	39.21	37.76	39.38	39.44	39.57	39.46
4.1	39.39	39.43	40.5	38.66	42.15	39.54	39.15	37.66	39.37	39.35	39.48	39.33
4.11667	39.28	39.34	40.47	38.38	41.8	39.54	39.1	37.59	39.34	39.27	39.42	39.13
4.13333	39.17	39.22	40.39	38.03	41.41	39.56	39.03	37.38	39.24	39.18	39.36	38.85
4.15	39.09	39.08	40.28	37.64	41.05	39.55	38.95	37.08	39.14	39.08	39.28	38.41
4.16667	39.01	38.91	40.13	37.24	40.85	39.51	38.83	36.83	39.02	38.95	39.18	37.96
4.18333	38.93	38.72	39.94	36.91	40.84	39.46	38.59	36.68	38.87	38.78	39.1	37.51
4.2	38.82	38.53	39.73	36.63	40.82	39.41	38.07	36.52	38.7	38.59	38.91	37.05
4.21667	38.71	38.32	39.5	36.31	40.83	39.35	37.57	36.32	38.52	38.38	38.66	36.69
4.23333	38.58	38.1	39.27	35.99	40.83	39.3	37.17	36.17	38.35	38.15	38.46	36.43
4.25	38.45	37.89	39.03	35.84	40.82	39.22	36.79	36.03	38.16	37.9	38.22	36.31
4.26667	38.31	37.68	38.78	35.69	40.75	39.14	36.47	35.96	37.97	37.65	38.03	36.26
4.28333	38.15	37.47	38.53	35.63	40.66	39.04	36.23	35.86	37.76	37.38	37.84	36.19
4.3	37.97	37.23	38.29	35.58	40.54	38.94	36.01	35.76	37.57	37.11	37.67	35.94
4.31667	37.8	36.99	37.97	35.59	40.47	38.83	35.83	35.64	37.38	36.84	37.51	35.72
4.33333	37.61	36.76	37.54	35.66	40.39	38.72	35.68	35.51	37.18	36.59	37.23	35.56
4.35	37.42	36.51	37.3	35.64	40.21	38.57	35.6	35.38	36.96	36.35	37.01	35.4
4.36667	37.22	36.3	37.07	35.55	40.04	38.37	35.51	35.28	36.76	36.13	36.77	35.4
4.38333	37.03	36.08	36.99	35.42	39.95	38.25	35.38	35.34	36.57	35.95	36.46	35.48
4.4	36.82	35.83	36.9	35.39	39.92	38.15	35.21	35.38	36.39	35.76	36.24	35.62
4.41667	36.61	35.6	36.71	35.53	39.98	38.04	35.03	35.36	36.23	35.58	36.07	35.62
4.43333	36.49	35.37	36.6	35.6	39.98	37.93	35.02	35.3	36.07	35.39	35.89	35.56
4.45	36.3	35.15	36.52	35.61	39.9	37.82	34.95	35.1	35.91	35.2	35.79	35.42
4.46667	36.04	34.94	36.45	35.56	39.75	37.72	34.84	34.98	35.74	35.02	35.66	35.34
4.48333	35.78	34.74	36.37	35.49	39.6	37.62	34.84	35.06	35.57	34.86	35.49	35.15
4.5	35.54	34.54	36.28	35.37	39.53	37.52	34.78	35.05	35.47	34.68	35.35	35.03
4.51667	35.38	34.35	36.18	35.27	39.54	37.41	34.92	34.97	35.38	34.4	35.35	35.19
4.53333	35.23	34.17	36.05	35.18	39.64	37.3	34.94	34.96	35.3	34.15	35.29	35.25
4.55	35.05	33.99	35.89	35.06	39.73	37.17	34.88	35.04	35.15	33.99	35.07	35.21
4.56667	34.86	33.8	35.74	34.97	39.6	37.04	34.95	35.14	35	33.85	34.89	35.16
4.58333	34.68	33.65	35.58	34.93	39.31	36.91	35.14	35.3	34.9	33.7	34.76	35.24
4.6	34.49	33.48	35.51	34.83	39.14	36.78	35.52	35.3	34.72	33.67	34.63	35.34
4.61667	34.31	33.33	35.45	34.7	39.06	36.65	35.63	35.26	34.68	33.67	34.52	35.34
4.63333	34.14	33.22	35.3	34.59	39.06	36.53	35.63	35.41	34.56	33.66	34.42	35.25
4.65	33.94	33.1	35.26	34.53	39.04	36.44	35.6	35.55	34.39	33.62	34.37	35.19
4.66667	33.72	32.99	35.32	34.51	38.96	36.37	35.55	35.66	34.35	33.46	34.2	35.1
4.68333	33.49	32.92	35.35	34.44	38.84	36.29	35.49	35.67	34.28	33.32	34.08	35.01
4.7	33.32	32.82	35.31	34.35	38.81	36.17	35.44	35.65	34.1	33.23	34.2	34.91
4.71667	33.2	32.71	35.21	34.27	38.77	36.04	35.38	35.57	34.08	33.18	34.35	34.83
4.73333	33.1	32.62	35.19	34.19	38.68	35.91	35.31	35.47	34.11	33.18	34.39	34.75
4.75	33.07	32.52	35.06	34.12	38.5	35.81	35.24	35.4	34.09	33.17	34.43	34.68
4.76667	32.95	32.42	34.99	34.04	38.38	35.71	35.21	35.43	34.12	33.13	34.51	34.6
4.78333	32.97	32.32	34.98	33.97	38.31	35.61	35.17	35.44	34.42	33.22	34.62	34.52
4.8	33.23	32.23	34.9	33.9	38.33	35.52	35.12	35.41	34.55	33.37	34.65	34.45
4.81667	33.34	32.14	35.07	33.84	38.61	35.43	35.05	35.39	34.67	33.37	34.65	34.4
4.83333	33.42	32.05	35.17	33.79	38.73	35.34	34.97	35.35	34.79	33.32	34.65	34.35
4.85	33.58	31.96	35.19	33.73	38.53	35.26	34.86	35.3	34.83	33.23	34.65	34.29
4.86667	33.72	31.8	35.17	33.67	38.38	35.15	34.78	35.25	34.83	33.16	34.63	34.25
4.88333	33.77	31.76	35.15	33.63	38.38	35.04	34.71	35.21	34.8	33.12	34.58	34.2
4.9	33.78	31.88	35.1	33.58	38.4	34.94	34.66	35.19	34.76	33.05	34.53	34.12
4.91667	33.81	32.05	35.01	33.51	38.82	34.86	34.62	35.13	34.71	32.98	34.48	34.06
4.93333	34.02	32.21	34.93	33.45	39.01	34.78	34.7	35.06	34.67	32.91	34.42	34.01
4.95	34.08	32.42	34.86	33.38	39.06	34.7	34.75	35.03	34.61	32.82	34.36	33.96
4.96667	33.85	32.58	34.78	33.32	39.09	34.62	34.73	35.01	34.54	32.75	34.31	33.97
4.98333	33.64	32.74	34.68	33.26	39.1	34.54	34.67	34.97	34.46	32.67	34.26	33.98
5	33.89	32.77	34.58	33.19	39.05	34.46	34.6	34.95	34.39	32.59	34.21	33.97
5.01667	34.17	32.48	34.49	33.13	38.94	34.38	34.54	34.92	34.32	32.51	34.17	33.95
5.03333	34.23	32.39	34.4	33.08	38.86	34.3	34.48	34.9	34.25	32.43	34.13	33.95
5.05	34.19	32.56	34.31	33.04	38.83	34.13	34.36	34.9	34.19	32.36	34.08	33.93
5.06667	34.19	32.94	34.22	32.98	38.9	33.84	34.28	34.9	34.18	32.26	34.03	33.92
5.08333	34.23	33.04	34.12	32.92	38.92	33.71	34.24	34.88	34.18	32.13	33.99	33.94
5.1	34.27	33.1	34.03	32.89	38.85	33.68	34.18	34.83	34.15	32.04	33.96	33.92
5.11667	34.32	33.22	33.94	32.89	38.8	33.67	34.14	34.8	34.1	32.05	33.93	33.88
5.13333	34.33	33.52	33.86	32.89	38.8	33.72	34.11	34.78	34.06	32.04	33.89	33.83
5.15	34.32	33.55	33.78	32.86	38.81	33.78	34.08	34.76	33.99	32.02	33.87	33.8
5.16667	34.31	33.66	33.66	32.82	38.82	33.84	34.03	34.75	33.94	32	33.83	33.75
5.18333	34.29	33.86	33.57	32.78	38.84	33.9	34	34.75	33.88	31.99	33.78	33.74
5.2	34.21	33.92	33.49	32.75	38.85	33.88	33.96	34.76	33.83	31.96	33.72	33.77
5.21667	34.14	33.93	33.46	32.71	38.82	33.79	33.93	34.76	33.78	31.94	33.66	33.77
5.23333	34.06	33.93	33.4	32.68	38.64	33.79	33.9	34.76	33.71	31.92	33.54	33.74
5.25	34.02	33.93	33.33	32.66	38.45	33.98	33.97	34.81	33.64	31.9	33.49	33.73
5.26667	33.96	33.91	33.26	32.64	38.26	34.06	34.02	34.84	33.54	31.87	33.49	33.74
5.28333	33.88	33.96	33.2	32.64	38.19	34.09	34.01	34.86	33.44	31.84	33.48	33.72
5.3	33.82	34.04	33.13	32.62	38.38	34.12	33.97	34.86	33.33	31.84	33.46	33.69
5.31667	33.76	34.06	33.07	32.6	38.78	34.25	33.83	34.86	33.25	31.83	33.43	33.67
5.33333	33.7	34.06	33.02	32.56	38.74	34.4	33.77	34.84	33.19	31.81	33.4	33.66
5.35	33.62	34.06	32.96	32.53	38.58	34.37	33.76	34.82	33.15	31.8	33.36	33.63
5.36667	33.56	34.05	32.93	32.53	38.7	34.3	33.65	34.79	33.16	31.79	33.32	33.63
5.38333	33.52	34.01	32.95	32.58	38.77	34.3	33.82	34.69	33.16	31.78	33.27	33.62
5.4	33.46	33.97	32.95	32.65	38.74	34.26	34.32	34.51	33.12	31.78	33.26	33.64
5.41667	33.38	33.93	32.92	32.79	38.68	34.2	34.36	34.44	33.08	31.77	33.27	33.64
5.43333	33.3	33.89	32.88	32.85	38.64	34.25	34.36	34.16	33.05	31.79	33.31	33.59
5.45	33.21	33.84	32.85	32.91	38.57	34.31	34.47	34.13	33.04	31.79	33.31	33.55
5.46667	33.13	33.81	32.82	33.15	38.55	34.53	34.66	34.54	33.02	31.79	33.32	33.52
5.48333	33.05	33.76	32.8	33.4	38.53	34.58	34.69	34.62	33.01	31.79	33.32	33.51
5.5	32.99	33.73	32.78	33.57	38.48	34.53	34.69	34.68	33.01	31.8	33.33	33.49
5.51667	32.91	33.7	32.76	33.53	38.46	34.35	34.66	34.96	32.99	31.82	33.36	33.45
5.53333	32.83	33.67	32.75	33.28	38.44	34.36	34.58	35.04	32.96	31.82	33.38	33.44
5.55	32.78	33.61	32.73	33.07	38.41	34.46	34.52	35.07	32.95	31.82	33.39	33.47
5.56667	32.77	33.58	32.72	32.97	38.38	34.48	34.48	35.05	32.95	31.82	33.43	33.47
5.58333	32.77	33.56	32.72	32.7	38.34	34.49	34.43	34.96	32.94	31.83	33.51	33.45
5.6	32.75	33.54	32.72	32.6	38.27	34.49	34.4	35.15	32.94	31.84	33.58	33.48
5.61667	32.72	33.5	32.72	32.88	38.21	34.49	34.37	35.33	32.94	31.85	33.62	33.48
5.63333	32.7	33.44	32.72	33.17	38.2	34.48	34.34	35.38	32.92	31.86	33.64	33.44
5.65	32.71	33.38	32.71	33.29	38.2	34.47	34.31	35.53	32.9	31.85	33.68	33.44
5.66667	32.72	33.35	32.68	33.34	38.18	34.37	34.27	35.6	32.88	31.72	33.69	33.43
5.68333	32.72	33.33	32.64	33.37	38.11	34.34	34.24	35.61	32.88	31.54	33.7	33.44
5.7	32.72	33.32	32.61	33.36	37.88	34.33	34.2	35.6	32.87	31.33	33.71	33.48
5.71667	32.72	33.32	32.6	33.32	37.76	34.29	34.18	35.58	32.87	31.35	33.7	33.56
5.73333	32.76	33.33	32.6	33.26	37.71	34.28	34.15	35.54	32.88	31.43	33.71	33.64
5.75	32.77	33.34	32.59	33.2	37.73	34.26	34.18	35.44	32.87	31.51	33.71	33.75
5.76667	32.78	33.36	32.57	33.15	37.79	34.21	34.2	35.39	32.82	31.54	33.7	33.79
5.78333	32.77	33.37	32.61	33.1	37.81	34.16	34.17	35.07	32.78	31.55	33.69	33.47
5.8	32.76	33.38	32.65	33.04	37.81	34.11	34.23	34.97	32.73	31.58	33.69	33.31
5.81667	32.75	33.39	32.67	32.96	37.78	34.08	34.34	35.25	32.7	31.6	33.69	33.53
5.83333	32.78	33.39	32.68	32.81	37.77	34.06	34.36	35.4	32.7	31.63	33.69	33.66
5.85	32.83	33.36	32.69	32.61	37.79	34.09	34.37	35.38	32.66	31.68	33.65	33.7
5.86667	32.88	33.34	32.69	32.48	37.78	34.09	34.37	35.41	32.64	31.71	33.64	33.55
5.88333	32.94	33.32	32.69	32.41	37.71	34.06	34.47	35.45	32.63	31.74	33.67	33.58
5.9	33.01	33.29	32.69	32.35	37.72	34	34.79	35.54	32.65	31.91	33.7	33.69
5.91667	33.07	33.29	32.71	32.27	37.74	33.9	34.97	35.54	32.69	32.09	33.71	33.74
5.93333	33.14	33.32	32.73	32.25	37.75	33.82	35.05	35.53	32.69	32.16	33.7	33.79
5.95	33.18	33.34	32.75	32.22	37.74	33.76	35.07	35.58	32.7	32.18	33.72	33.92
5.96667	33.2	33.35	32.78	32.16	37.73	33.7	35.07	35.6	32.72	32.21	33.73	34.15
5.98333	33.2	33.37	32.8	32.12	37.72	33.64	35.07	35.5	32.77	32.23	33.73	34.4
6	33.13	33.38	32.81	32.06	37.72	33.57	35.05	35.42	32.81	32.26	33.72	34.48
6.01667	33.01	33.39	32.81	31.99	37.82	33.52	35.01	35.65	32.92	32.28	33.7	34.49
6.03333	33.02	33.39	32.82	31.95	37.98	33.48	34.98	35.61	32.94	32.3	33.69	34.5
6.05	33.11	33.39	32.82	31.93	37.96	33.47	35.03	35.71	32.94	32.31	33.7	34.51
6.06667	33.24	33.38	32.8	31.9	37.92	33.47	35.12	36.03	32.94	32.31	33.71	34.49
6.08333	33.29	33.37	32.8	31.87	37.92	33.45	35.3	36.16	32.94	32.31	33.72	34.49
6.1	33.4	33.37	32.78	31.86	37.94	33.43	35.33	36.15	32.93	32.3	33.72	34.52
6.11667	33.56	33.36	32.75	31.84	37.94	33.41	35.28	36.1	32.91	32.3	33.69	34.55
6.13333	33.72	33.36	32.52	31.85	37.93	33.41	35.29	36.07	32.91	32.27	33.66	34.57
6.15	33.77	33.36	32.41	31.94	37.91	33.41	35.43	36.01	32.91	32.26	33.65	34.57
6.16667	33.78	33.37	32.32	32	37.9	33.4	35.5	36.02	32.91	32.28	33.65	34.55
6.18333	33.78	33.39	32.09	32.02	37.86	33.38	35.52	36.01	32.91	32.37	33.65	34.56
6.2	33.76	33.39	31.99	32.02	37.79	33.36	35.64	35.95	32.91	32.5	33.63	34.57
6.21667	33.73	33.41	32.07	32.01	37.97	33.37	35.99	35.91	32.91	32.52	33.62	34.56
6.23333	33.73	33.46	32.4	32	38.02	33.38	36.04	35.82	32.91	32.53	33.62	34.52
6.25	33.77	33.48	32.43	31.98	37.85	33.37	36.09	35.72	32.93	32.55	33.63	34.46
6.26667	33.77	33.53	32.51	31.95	37.62	33.37	36.14	35.62	32.94	32.61	33.63	34.41
6.28333	33.75	33.59	32.55	31.93	37.58	33.37	36.15	35.55	32.95	32.69	33.61	34.39
6.3	33.72	33.67	32.47	31.92	37.48	33.37	36.14	35.57	32.95	32.75	33.57	34.38
6.31667	33.69	33.69	32.38	31.9	37.44	33.37	36.24	35.64	32.96	32.8	33.54	34.38
6.33333	33.65	33.7	32.4	31.9	37.46	33.39	36.39	35.64	32.96	32.79	33.5	34.4
6.35	33.61	33.7	32.58	31.89	37.53	33.4	36.36	35.63	32.96	32.72	33.52	34.42
6.36667	33.59	33.75	32.66	31.9	37.57	33.43	36.06	35.61	32.94	32.7	33.56	34.46
6.38333	33.58	33.79	33.34	32.08	37.58	33.47	35.92	35.58	32.93	32.68	33.58	34.46
6.4	33.58	33.84	33.62	32.37	37.65	33.51	35.85	35.63	32.93	32.65	33.6	34.46
6.41667	33.56	33.86	33.66	32.4	37.75	33.56	35.82	35.66	32.93	32.63	33.63	34.47
6.43333	33.57	33.87	33.68	32.4	38.11	33.6	35.81	35.63	32.94	32.57	33.63	34.47
6.45	33.58	33.87	33.67	32.4	38.36	33.65	35.8	35.56	32.98	32.52	33.65	34.47
6.46667	33.55	33.88	33.69	32.43	38.4	33.72	35.84	35.51	33.01	32.47	33.7	34.47
6.48333	33.55	33.88	33.69	32.46	38.43	33.76	36.04	35.47	33.02	32.51	33.69	34.46
6.5	33.56	33.87	33.73	32.47	38.51	33.79	36.04	35.42	33.02	32.59	33.48	34.45
6.51667	33.6	33.87	33.99	32.48	38.54	33.79	35.96	35.38	33.03	32.57	33.08	34.45
6.53333	33.64	33.87	34.08	32.47	38.53	33.79	35.86	35.35	33.08	32.58	32.92	34.44
6.55	33.67	33.85	34.06	32.5	38.45	33.8	35.75	35.28	33.12	32.58	32.71	34.42
6.56667	33.67	33.83	34.06	32.52	38.33	33.8	35.67	35.21	33.19	32.6	32.59	34.41
6.58333	33.65	33.81	34.08	32.52	38.22	33.77	35.59	35.13	33.22	32.79	32.56	34.4
6.6	33.67	33.79	34.05	32.52	38.13	33.77	35.56	35.08	33.23	32.81	32.67	34.39
6.61667	33.67	33.81	33.87	32.5	38.04	33.79	35.53	35	33.23	32.7	32.69	34.38
6.63333	33.65	33.85	33.55	32.63	37.92	33.81	35.5	34.78	33.22	32.58	32.55	34.36
6.65	33.65	33.87	33.69	32.69	37.83	33.82	35.44	34.76	33.21	32.6	32.41	34.37
6.66667	33.65	33.93	33.79	32.69	37.78	33.86	35.36	34.62	33.2	32.66	32.48	34.37
6.68333	33.65	33.98	33.87	32.68	37.74	33.91	35.25	34.58	33.19	32.69	32.96	34.36
6.7	33.73	34.02	34.01	32.68	37.71	33.93	35.15	35.03	33.19	32.7	33.25	34.35
6.71667	33.99	34.07	34.03	32.84	37.73	33.93	35.08	35.47	33.22	32.73	33.31	34.32
6.73333	34.07	34.11	34.01	32.87	37.74	33.94	35.01	35.55	33.22	32.74	33.35	34.32
6.75	34.29	34.13	33.92	32.86	37.76	33.95	34.91	35.54	33.24	32.77	33.41	34.33
6.76667	34.23	34.14	34.03	32.87	37.8	33.95	34.84	35.66	33.26	32.78	33.45	34.32
6.78333	34.11	34.14	34.06	33.22	37.83	33.93	34.8	35.87	33.3	32.81	33.45	34.26
6.8	34.03	34.15	34.15	33.44	37.85	33.91	34.77	35.94	33.34	32.83	33.45	34.19
6.81667	33.83	34.17	34.19	33.54	37.85	33.81	34.72	36	33.36	32.85	33.48	34.18
6.83333	33.59	34.17	34.19	33.57	37.86	33.88	34.69	36.05	33.37	32.88	33.49	34.19
6.85	33.66	34.18	34.3	33.5	37.86	34.11	34.68	36.06	33.41	32.91	33.47	34.19
6.86667	33.77	34.2	34.35	33.59	37.88	34.23	34.71	36.06	33.42	32.93	33.44	34.26
6.88333	34.21	34.22	34.28	33.76	37.91	34.33	34.78	36.06	33.52	32.96	33.36	34.31
6.9	34.49	34.24	34.24	33.86	37.91	34.37	34.81	36.03	33.74	32.97	33.48	34.32
6.91667	34.4	34.24	34.3	34.02	37.9	34.37	34.82	35.64	33.77	32.97	33.55	34.31
6.93333	34.28	34.24	34.29	34.1	37.89	34.35	34.83	35.44	33.77	33.08	33.62	34.28
6.95	34.25	34.23	34.29	34.13	37.85	34.32	34.84	35.51	33.69	33.12	33.66	34.26
6.96667	34.47	34.23	34.35	34.18	37.87	34.3	34.86	35.74	33.54	33.1	33.61	34.24
6.98333	34.93	34.23	34.33	34.2	37.91	34.29	34.89	35.99	33.51	33.09	33.57	34.22
7	35.08	34.23	34.26	34.15	37.9	34.29	34.89	36.17	33.55	33.1	33.63	34.23
7.01667	34.98	34.23	34.22	34.08	37.84	34.3	34.87	36.27	33.61	33.1	33.71	34.21
7.03333	35.13	34.22	34.21	34.08	37.76	34.33	34.86	36.29	33.58	33.18	33.68	34.11
7.05	35.22	34.22	34.16	34.15	37.76	34.35	34.86	36.08	33.52	33.28	33.59	34
7.06667	35.23	34.22	34.05	34.4	37.78	34.37	34.85	35.8	33.61	33.33	33.52	33.93
7.08333	35.21	34.22	33.92	34.48	37.71	34.38	34.84	35.63	33.7	33.34	33.46	33.89
7.1	35.18	34.22	33.85	34.65	37.63	34.43	34.83	35.63	33.74	33.35	33.43	33.75
7.11667	35.09	34.22	33.79	34.83	37.57	34.46	34.84	35.7	33.75	33.36	33.38	33.91
7.13333	35.07	34.22	33.78	34.81	37.53	34.49	34.88	35.97	33.75	33.4	33.28	34.09
7.15	35.06	34.22	33.78	34.75	37.55	34.51	34.9	36.26	33.74	33.64	33.2	34.12
7.16667	35.04	34.24	33.77	34.72	37.59	34.55	34.93	36.53	33.74	33.71	33.13	34.07
7.18333	35	34.27	33.76	34.68	37.58	34.58	34.96	36.41	33.73	33.72	33.12	34.06
7.2	34.97	34.31	33.78	34.69	37.59	34.59	34.98	35.98	33.75	33.71	33.15	34.27
7.21667	34.91	34.32	33.76	34.67	37.59	34.59	35	35.87	33.75	33.69	33.17	34.4
7.23333	34.82	34.28	33.75	34.59	37.59	34.6	35.03	35.83	33.76	33.69	33.18	34.43
7.25	34.75	34.2	33.73	34.54	37.59	34.65	35.06	35.68	33.75	33.67	33.2	34.43
7.26667	34.86	34.16	33.7	34.52	37.52	34.69	35.05	35.86	33.73	33.66	33.23	34.45
7.28333	34.88	34.13	33.68	34.43	37.48	34.72	35.05	36.23	33.87	33.71	33.34	34.48
7.3	34.91	34.1	33.68	34.34	37.45	34.74	35.1	36.29	33.96	33.74	33.42	34.51
7.31667	34.9	34.08	33.69	34.25	37.52	34.93	35.19	36.23	33.98	33.77	33.45	34.48
7.33333	34.86	34.05	33.68	34.18	37.76	35	35.14	36.11	33.96	33.81	33.45	34.42
7.35	34.8	34.04	33.67	34.2	37.81	34.98	34.75	35.97	33.89	33.71	33.43	34.37
7.36667	34.77	34.03	33.68	34.17	37.79	34.87	34.67	35.91	33.83	33.57	33.43	34.32
7.38333	34.75	34.03	33.72	34.09	37.73	34.8	34.51	35.86	33.78	33.61	33.41	34.32
7.4	34.75	34.04	33.7	34.05	37.68	34.77	34.7	35.81	33.82	33.63	33.39	34.33
7.41667	34.74	34.04	33.66	34.15	37.65	34.9	34.93	35.81	33.82	33.57	33.52	34.34
7.43333	34.72	34.04	33.67	34.27	37.81	34.92	35.04	35.87	33.77	33.5	33.61	34.39
7.45	34.8	34.02	33.67	34.29	38.1	35.05	35.06	35.93	33.71	33.71	33.62	34.43
7.46667	34.9	34.01	33.67	34.23	37.94	35.16	35.08	36.03	33.71	33.87	33.62	34.44
7.48333	34.92	33.98	33.69	34.15	37.37	35.24	35.23	36.14	33.84	33.9	33.61	34.44
7.5	34.95	33.98	33.68	34.07	37.29	35.27	35.18	36.24	33.85	33.87	33.55	34.43
7.51667	35.01	34	33.69	34.01	37.36	35.3	35.11	36.33	33.85	33.87	33.48	34.41
7.53333	35.06	34.04	33.77	33.97	37.26	35.37	35.16	36.43	33.85	33.92	33.53	34.49
7.55	35.11	34.08	33.79	33.95	37.22	35.43	35.18	36.52	33.85	33.99	33.69	34.53
7.56667	35.19	34.11	33.79	33.9	37.45	35.5	35.25	36.53	33.85	34.04	33.76	34.54
7.58333	35.28	34.13	33.79	33.86	37.53	35.54	35.55	36.53	33.88	34.08	33.8	34.55
7.6	35.36	34.13	33.78	33.85	37.65	35.71	35.49	36.51	33.89	34.05	33.78	34.57
7.61667	35.3	34.15	33.74	33.92	37.71	35.77	35.25	36.38	33.86	34	33.73	34.61
7.63333	35.11	34.18	33.75	33.96	37.79	35.81	35.16	36.27	33.77	34	33.62	34.64
7.65	35.26	34.21	33.77	33.96	37.87	35.88	35.19	36.2	33.75	33.97	33.51	34.66
7.66667	35.31	34.24	33.78	33.93	37.71	36.02	35.36	36.26	33.75	33.86	33.56	34.74
7.68333	35.36	34.27	33.77	33.89	37.6	36.1	35.7	36.18	33.74	33.75	33.64	34.78
7.7	35.67	34.33	33.76	33.88	37.57	36.12	36.01	36.11	33.76	33.68	33.76	34.8
7.71667	35.89	34.34	33.77	33.87	37.56	36.18	35.94	36.44	33.79	33.62	33.83	34.83
7.73333	35.92	34.38	33.83	33.84	37.59	36.28	35.56	36.54	33.81	33.58	33.84	34.89
7.75	36.04	34.46	33.85	33.79	37.73	36.31	35.4	36.57	33.86	33.65	33.85	34.91
7.76667	36.24	34.46	33.8	33.72	37.85	36.1	35.3	36.59	33.9	33.89	33.92	34.92
7.78333	36.18	34.43	33.76	33.63	37.87	35.92	35.33	36.41	33.96	33.88	34.01	34.92
7.8	36.11	34.43	33.75	33.67	37.86	35.99	35.56	36.15	34.04	33.81	34.06	34.92
7.81667	36.13	34.39	33.8	33.65	37.84	36.12	35.74	36.11	34.1	33.63	34.1	34.91
7.83333	36.13	34.44	33.91	33.58	37.82	36.15	35.83	36.09	34.16	33.54	34.13	34.9
7.85	36.12	34.68	33.93	33.54	37.82	36.15	35.84	36.09	34.2	33.61	34.18	34.7
7.86667	36.06	34.78	34	33.55	37.85	36.13	35.85	36.12	34.24	33.63	34.27	34.33
7.88333	35.94	34.85	34.11	33.57	37.71	36.09	35.85	36.18	34.26	33.62	34.32	34.2
7.9	35.83	34.98	34.35	33.58	37.6	36.04	35.84	36.29	34.29	33.56	34.31	34.19
7.91667	35.74	35.11	34.57	33.58	37.59	35.98	35.82	36.36	34.32	33.57	34.22	34.21
7.93333	35.68	35.21	34.56	33.57	37.54	35.9	35.73	36.37	34.34	33.57	34.24	34.41
7.95	35.65	35.29	34.61	33.56	37.49	35.81	35.57	36.34	34.34	33.5	34.29	34.72
7.96667	35.73	35.23	34.87	33.66	37.47	35.76	35.45	36.41	34.34	33.44	34.29	34.73
7.98333	35.76	35.16	34.96	33.8	37.43	35.74	35.37	36.43	34.33	33.46	34.26	34.65
8	35.78	35.39	35.01	33.85	37.39	35.72	35.29	36.26	34.31	33.47	34.25	34.61
8.01667	35.8	35.58	35.04	33.94	37.42	35.71	35.23	36.25	34.3	33.46	34.42	34.71
8.03333	35.81	35.67	35.06	33.91	37.51	35.68	35.15	36.29	34.29	33.42	34.37	34.74
8.05	35.82	35.78	35.09	33.81	37.59	35.59	35.08	36.44	34.27	33.53	34.16	34.74
8.06667	35.81	35.89	35.07	33.79	37.69	35.52	35.01	36.5	34.18	33.59	34.04	34.69
8.08333	35.84	35.82	35.05	33.81	37.78	35.49	34.94	36.5	34.11	33.61	34.07	34.64
8.1	35.86	35.58	35.03	33.83	37.79	35.47	34.91	36.47	34.05	33.62	34.35	34.64
8.11667	35.87	35.57	35.05	33.93	37.74	35.46	34.88	36.33	34.03	33.7	34.52	34.76
8.13333	35.79	35.86	35.06	34.44	37.77	35.46	34.83	36.11	34.15	33.78	34.43	34.76
8.15	35.64	36.09	35.07	34.5	37.82	35.46	34.79	36.02	34.32	33.81	34.25	34.69
8.16667	35.76	36.15	35.06	34.49	37.82	35.47	34.75	36.03	34.25	33.8	34.57	34.94
8.18333	35.78	36.03	35.02	34.49	37.82	35.48	34.74	36.07	34.14	33.77	34.5	34.96
8.2	35.81	35.87	34.99	34.48	37.84	35.55	34.78	36.27	34.12	33.74	34.17	34.77
8.21667	35.83	35.77	35	34.51	38.39	35.6	34.78	36.5	34.12	33.72	33.96	34.9
8.23333	35.86	35.62	34.71	34.53	38.57	35.63	34.77	36.36	34.21	33.7	33.95	35.09
8.25	36.07	35.45	34.35	34.55	38.62	35.64	34.76	36.08	34.56	33.69	33.89	35.09
8.26667	36.29	35.44	34.37	34.59	38.61	35.67	34.75	36.14	34.69	33.68	34.04	35.14
8.28333	36.44	35.49	34.37	34.63	38.58	35.67	34.74	36.06	34.71	33.69	34.54	35.33
8.3	36.49	35.53	34.21	34.66	38.61	35.69	34.77	36.08	34.82	33.69	34.76	35.49
8.31667	36.55	35.48	34.17	34.65	38.61	35.78	34.8	36.15	34.88	33.68	34.92	35.62
8.33333	36.59	35.4	34.15	34.63	38.79	35.8	34.76	36.15	34.91	33.69	35.1	35.7
8.35	36.59	35.29	34.16	34.63	38.99	35.81	34.77	36.31	34.9	33.76	35.13	35.69
8.36667	36.62	35.16	34.16	34.65	38.89	35.82	34.79	36.49	35.09	33.8	35.14	35.75
8.38333	36.65	35.15	34.12	34.48	39.15	35.81	34.71	36.47	35.13	33.78	35.29	35.84
8.4	36.68	35.18	34.21	34.13	39.18	35.76	34.74	36.22	35.08	33.75	35.28	35.91
8.41667	36.67	35.25	34.48	34.3	38.9	35.81	35.01	36.07	35.21	33.73	35.21	35.97
8.43333	36.63	35.27	34.47	34.38	38.99	35.91	35.05	36.01	35.25	33.72	35.26	36.06
8.45	36.42	35.3	34.35	34.47	39.06	35.99	35	36.01	35.3	33.79	35.28	36.07
8.46667	36.33	35.34	34.62	34.63	38.99	35.99	34.97	35.99	35.33	33.84	35.38	36.1
8.48333	36.42	35.39	34.76	35.09	38.95	35.97	34.99	35.93	35.45	33.95	35.39	36.1
8.5	36.27	35.42	34.7	35.08	38.86	35.9	35.29	35.88	35.45	34.04	35.18	36.03
8.51667	36.35	35.41	34.37	34.88	38.82	35.75	35.55	35.96	35.35	34.2	34.98	36.03
8.53333	36.51	35.41	34.55	34.68	38.81	35.85	35.62	35.9	35.3	34.35	34.91	36.03
8.55	36.42	35.43	34.67	34.43	38.75	35.99	35.71	35.78	35.34	34.4	34.72	36.03
8.56667	36.41	35.4	34.54	34.28	38.63	35.97	35.72	35.96	35.35	34.42	34.54	36.01
8.58333	36.6	35.32	34.61	34.57	38.55	35.89	35.69	35.99	35.34	34.4	34.49	35.94
8.6	36.81	35.26	34.75	35.02	38.53	36.17	35.72	35.85	35.33	34.34	34.32	35.87
8.61667	37.1	35.21	35.14	35.16	38.37	36.39	35.88	35.82	35.31	34.33	34.55	35.78
8.63333	37.16	35.14	35.38	35.31	38.1	36.41	36.11	36.1	35.29	34.59	34.84	35.7
8.65	37.12	35.07	35.08	35.51	38.22	36.36	36.14	36.42	35.19	34.62	34.92	35.64
8.66667	36.96	35	34.91	35.52	38.2	36.3	36.21	36.49	35.14	34.5	34.93	35.59
8.68333	36.92	34.95	35.37	35.48	38	36.25	36.42	36.52	35.12	34.44	34.93	35.56
8.7	36.99	34.91	35.43	35.46	38.01	36.64	36.44	36.51	35.1	34.37	34.94	35.45
8.71667	37.01	34.77	35.46	35.36	38.03	36.75	36.42	36.34	35.1	34.29	35.03	35.38
8.73333	36.98	34.62	35.48	35.49	38.13	36.75	36.37	36.33	35.13	34.51	35.17	35.38
8.75	36.94	34.5	35.44	35.55	38.38	36.9	36.21	36.38	35.13	35.02	35.2	35.4
8.76667	36.79	34.42	35.52	35.56	38.45	36.93	35.82	36.5	35.14	35.14	35.27	35.46
8.78333	36.7	34.37	35.63	35.53	38.61	36.91	35.86	36.49	35.14	35.15	35.31	35.52
8.8	36.82	34.33	35.59	35.42	38.71	36.9	35.86	36.6	35.14	35.13	35.49	35.66
8.81667	37.01	34.3	35.54	35.46	38.69	36.88	35.88	36.77	35.13	35.05	35.72	35.75
8.83333	36.98	34.37	35.57	35.7	38.54	36.92	36.13	36.45	35.12	34.96	35.86	35.78
8.85	36.66	34.43	35.58	35.83	38.46	36.99	36.34	36.2	35.09	35.01	35.9	36.01
8.86667	36.59	34.48	35.47	35.84	38.38	37.01	36.74	36.14	35.03	35.25	35.89	36.07
8.88333	36.83	34.52	35.21	35.83	38.39	37	36.95	36.09	35.01	35.31	35.9	36.12
8.9	37.06	34.54	34.89	35.94	38.5	36.74	36.99	36.19	35.11	35.37	35.93	36.13
8.91667	37.17	34.55	34.8	36	38.45	36.22	36.93	36.24	35.17	35.49	36	35.92
8.93333	37.16	34.59	34.89	35.95	38.43	36.08	36.87	36.17	35.1	35.46	36.15	35.71
8.95	37.19	34.6	34.94	35.85	38.41	36.04	36.59	36.02	35.22	35.42	36.26	35.95
8.96667	37.45	34.62	35.19	35.74	38.34	35.89	36.19	36.05	35.33	35.45	36.3	36.28
8.98333	37.53	34.67	35.22	35.64	38.29	35.89	36.04	36.21	35.44	35.42	36.22	36.41
9	37.32	34.67	35.19	35.56	38.24	35.91	35.94	36.32	35.34	35.33	36.12	36.5
9.01667	37.11	34.66	35.17	35.48	38.21	35.97	35.63	36.54	35.38	35.31	36.17	36.53
9.03333	37.09	34.58	35.14	35.47	38.17	36.02	35.55	36.67	35.36	35.36	36.18	36.52
9.05	37.11	34.56	35.08	35.49	38.17	36	35.45	36.71	35.22	35.47	36.16	36.52
9.06667	37.16	34.5	35.03	35.47	38.18	35.9	35.69	36.75	35.2	35.48	36.09	36.47
9.08333	37.25	34.5	35	35.43	38.27	36.05	35.93	36.76	35.18	35.33	36.04	36.4
9.1	37.28	34.55	35	35.44	38.49	36.26	36.21	36.71	35.34	35.05	36.04	36.39
9.11667	37.16	34.84	35.04	35.52	39	36.43	36.65	36.58	35.87	34.95	36.24	36.36
9.13333	37.01	34.87	35.14	35.58	39.2	36.73	36.77	36.52	36.07	34.61	36.27	36.35
9.15	36.96	34.7	35.19	35.61	39.18	36.74	36.77	36.36	36.14	34.21	36.22	36.34
9.16667	37.1	34.36	35.2	35.63	39.17	36.46	36.79	36.39	36.22	34.14	36.21	36.33
9.18333	37.24	34.35	35.23	35.66	39.18	36.3	36.98	36.51	36.3	34.04	36.23	36.28
9.2	37.26	34.64	35.25	35.66	39.17	36.18	37.01	36.56	36.31	33.94	36.24	36.25
9.21667	37.21	34.75	35.34	35.68	39.24	36.42	37	36.7	36.27	33.99	36.25	36.24
9.23333	37.16	34.84	35.36	35.74	39.3	36.45	36.86	36.81	36.17	34.02	36.22	36.23
9.25	37.12	34.87	35.41	35.79	39.39	36.38	36.65	36.94	36.11	34.06	36.28	36.2
9.26667	37.1	34.71	35.45	35.83	39.44	36.28	36.58	36.98	36.06	34.25	36.44	36.09
9.28333	37.11	34.67	35.41	35.85	39.47	36.24	36.61	36.99	36.32	34.54	36.43	35.93
9.3	37.05	34.75	35.04	35.83	39.49	36.23	36.63	36.76	36.54	35.57	36.41	35.9
9.31667	36.87	34.76	34.95	35.77	39.47	36.27	36.65	36.6	36.55	35.72	36.41	35.96
9.33333	36.75	34.79	34.95	35.68	39.29	36.21	36.61	36.65	36.57	35.72	36.3	36
9.35	36.78	34.82	34.88	35.59	39.21	35.96	36.41	36.73	36.64	35.74	36.23	35.98
9.36667	36.82	34.77	34.86	35.46	39.32	35.88	36.15	36.8	36.73	35.64	36.29	35.97
9.38333	36.8	34.62	35.04	35.53	39.37	35.88	35.95	36.78	36.77	35.79	36.38	36.01
9.4	36.76	34.48	35.43	35.55	39.48	35.78	35.93	36.74	36.77	35.91	36.42	36.07
9.41667	36.58	34.45	35.61	35.39	39.7	35.77	36.1	36.73	36.69	35.95	36.58	36.38
9.43333	36.31	34.34	35.6	35.24	39.7	35.8	36.37	36.72	36.66	36	36.66	36.54
9.45	36.6	34.25	35.54	35.18	39.31	35.87	36.64	36.82	36.67	35.92	36.58	36.61
9.46667	36.76	34.44	35.71	35.37	39.38	36.06	36.68	36.86	36.68	35.78	36.42	36.67
9.48333	36.71	34.53	35.67	35.42	39.42	36.47	36.48	36.84	36.7	35.54	36.3	36.79
9.5	36.64	34.51	35.57	35.37	39.07	36.67	36.29	36.86	36.71	35.46	36.22	36.9
9.51667	36.73	34.49	35.64	35.25	38.86	36.77	36.26	36.84	36.71	35.59	36.31	37.15
9.53333	36.87	34.5	35.84	35.2	38.73	36.83	36.14	36.83	36.66	35.62	36.4	37.16
9.55	36.93	34.5	35.86	35.1	38.69	36.83	36.03	36.87	36.54	35.59	36.4	37.08
9.56667	37.04	34.52	35.77	35.35	38.64	36.82	36.07	36.9	36.47	35.59	36.38	37.01
9.58333	37.19	34.57	35.84	35.99	38.58	36.89	36.08	36.91	36.48	35.56	36.34	36.95
9.6	37.09	34.62	35.87	36.21	38.66	37.11	36.1	36.91	36.63	35.42	35.95	36.8
9.61667	36.94	34.75	35.94	36.3	38.99	37.15	36.23	37	36.73	35.39	35.54	36.64
9.63333	36.95	34.73	35.95	36.31	39	37.13	36.4	37.02	36.8	35.55	35	36.57
9.65	36.96	34.68	35.9	36.29	38.76	37.03	36.48	36.65	36.86	35.68	34.68	36.5
9.66667	36.95	34.79	36.03	36.27	38.58	37.17	36.46	36.62	36.91	35.67	35.02	36.48
9.68333	36.78	34.82	36.27	36.25	38.81	37.22	36.3	36.56	36.87	35.67	35.56	36.46
9.7	36.64	34.85	36.32	36.23	38.99	36.99	36.21	36.62	36.79	35.69	35.45	36.43
9.71667	36.54	34.75	36.34	36.19	39.08	36.76	36.14	36.74	36.67	35.62	35.66	36.44
9.73333	36.66	34.66	36.37	36.09	39.11	36.39	36.13	36.76	36.62	35.51	36.02	36.44
9.75	36.73	34.63	36.33	36.07	39.11	36.22	36.45	36.71	36.59	35.35	36.06	36.43
9.76667	36.7	34.79	36.18	36.11	39.12	36.36	36.47	36.51	36.57	34.99	36.06	36.44
9.78333	36.85	34.8	36.15	36.12	39.12	36.56	36.71	36.53	36.51	34.73	36.22	36.43
9.8	36.9	34.79	36.2	36.04	39.09	36.55	36.67	36.47	36.43	34.61	36.23	36.36
9.81667	36.92	34.93	36.14	35.9	39.08	36.47	36.56	36.53	36.35	34.54	36.16	36.35
9.83333	37	35.04	36.02	35.98	39.09	36.27	36.5	36.83	36.23	34.45	36.12	36.3
9.85	37.04	35.02	36.06	36.28	39.11	36.24	36.25	36.99	36.22	34.37	36.07	36.58
9.86667	37.04	35.02	36.13	36.32	39.02	36.27	36.24	37.26	36.41	34.32	35.96	36.83
9.88333	37.03	35.24	36.06	36.23	38.74	36.22	36.25	37.36	36.5	34.29	35.85	36.76
9.9	37.06	35.42	35.94	36.33	38.58	36.19	36.22	37.34	36.52	34.25	35.76	36.49
9.91667	37.3	35.47	35.94	36.53	38.46	36.16	36.19	37.23	36.51	34.3	35.73	36.73
9.93333	37.46	35.48	35.98	36.7	38.32	36.13	36.15	37.1	36.5	34.38	35.73	36.86
9.95	37.47	35.52	36.05	36.79	38.24	36.13	36.2	36.99	36.4	34.47	35.73	36.81
9.96667	37.39	35.52	36.1	36.81	38.23	36.09	36.21	36.85	36.45	34.56	35.75	36.76
9.98333	37.2	35.52	36.11	36.79	38.28	36.04	36.16	36.75	36.52	34.67	35.77	36.82
10	37	35.5	36.04	36.75	38.37	36.06	36.22	36.68	36.55	35.14	35.81	36.86

## Sheet: Tg(Myh11-CreERT2) Cool
Time	Tg(Myh11-CreERT2)	Tg(Myh11-CreERT2)	Tg(Myh11-CreERT2)	Tg(Myh11-CreERT2)	Tg(Myh11-CreERT2)	Tg(Myh11-CreERT2)	Tg(Myh11-CreERT2);Trpv1fl/fl	Tg(Myh11-CreERT2);Trpv1fl/fl	Tg(Myh11-CreERT2);Trpv1fl/fl	Tg(Myh11-CreERT2);Trpv1fl/fl	Tg(Myh11-CreERT2);Trpv1fl/fl	Tg(Myh11-CreERT2);Trpv1fl/fl
	S161	S562	T467	T469	T751	U288	S164	S166	S640	T502	T506	T896
-1	35.47	35.59	34.55	33.87	37.79	36.1	35.95	35.97	34.03	33.83	34.27	35.31
-0.98333	35.54	35.58	34.53	34.17	37.76	36.05	35.63	35.97	34.03	33.78	34.33	35.3
-0.96667	35.63	35.55	34.58	34.39	37.72	36.03	35.18	35.98	33.96	33.81	34.33	35.3
-0.95	35.67	35.53	34.72	34.44	37.67	36.05	35.08	35.95	34.04	33.84	34.31	35.32
-0.93333	35.63	35.52	34.74	34.56	37.66	36.03	35.01	35.99	34.08	33.86	34.23	35.4
-0.91667	35.67	35.52	34.64	34.82	37.66	35.94	35.13	36.03	34.1	33.85	34.13	35.44
-0.9	35.76	35.51	34.7	35.06	37.67	35.86	35.3	36.08	34.12	33.84	34.14	35.45
-0.88333	35.8	35.55	34.74	35.2	38.03	35.81	35.32	36.19	34.12	33.83	34.13	35.46
-0.86667	35.83	35.59	34.75	35.28	38.07	35.75	35.37	36.19	34.06	33.8	34.12	35.45
-0.85	35.93	35.58	34.9	35.32	38.01	35.7	35.43	36.14	34.02	33.76	34.09	35.44
-0.83333	35.85	35.57	35.07	35.39	37.89	35.8	35.45	36.1	34.02	33.71	34.06	35.43
-0.81667	35.55	35.54	35.12	35.52	37.81	35.93	35.43	36.06	34.02	33.69	34.03	35.4
-0.8	35.55	35.51	35.18	35.58	37.8	35.93	35.35	36.03	34.01	33.64	33.99	35.4
-0.78333	35.67	35.47	35.22	35.54	37.8	35.88	35.27	35.97	33.8	33.58	33.97	35.44
-0.76667	35.78	35.44	35.27	35.51	37.83	35.83	35.19	35.88	33.76	33.52	33.94	35.44
-0.75	35.81	35.43	35.36	35.64	37.87	35.78	35.13	35.83	33.79	33.46	33.9	35.44
-0.73333	35.89	35.4	35.41	35.76	37.97	35.75	35.07	35.77	33.81	33.4	33.89	35.48
-0.71667	35.97	35.35	35.38	35.75	38.11	35.76	35	35.76	33.89	33.4	33.89	35.52
-0.7	35.94	35.34	35.28	35.56	38.17	35.76	34.95	35.81	33.98	33.43	33.87	35.53
-0.68333	35.92	35.35	35.28	35.56	38.2	35.76	34.96	35.8	34.39	33.47	33.85	35.54
-0.66667	35.89	35.39	35.38	35.6	38.22	35.77	34.96	35.77	34.62	33.49	33.84	35.55
-0.65	35.84	35.41	35.49	35.46	38.29	35.8	34.94	35.74	34.77	33.49	33.82	35.6
-0.63333	35.79	35.42	35.45	35.4	38.4	35.81	34.91	35.72	34.96	33.54	33.8	35.61
-0.61667	35.72	35.43	35.42	35.29	38.47	35.82	34.87	35.7	35.02	33.55	33.77	35.59
-0.6	35.64	35.45	35.48	35.24	38.48	35.88	34.83	35.68	35.09	33.53	33.75	35.42
-0.58333	35.56	35.45	35.49	35.29	38.5	35.99	34.82	35.67	35.19	33.5	33.73	35.37
-0.56667	35.51	35.45	35.47	35.28	38.56	35.99	34.82	35.67	35.29	33.48	33.72	35.35
-0.55	35.49	35.45	35.42	35.38	38.6	35.95	34.81	35.71	35.32	33.46	33.7	35.31
-0.53333	35.47	35.45	35.37	35.48	38.58	35.87	34.79	35.72	35.38	33.45	33.68	35.25
-0.51667	35.44	35.45	35.32	35.5	38.29	35.8	34.76	35.71	35.45	33.46	33.67	35.17
-0.5	35.42	35.45	35.23	35.47	38.14	35.73	34.74	35.69	35.45	33.48	33.68	35.11
-0.48333	35.41	35.46	35.17	35.42	38.21	35.66	34.73	35.68	35.41	33.47	33.67	35.09
-0.46667	35.4	35.48	35.1	35.3	38.32	35.62	34.7	35.73	35.38	33.44	33.66	35.12
-0.45	35.37	35.51	35.03	35.17	38.55	35.59	34.66	35.82	35.26	33.4	33.65	35.23
-0.43333	35.35	35.52	34.89	35.07	38.74	35.57	34.62	35.9	35.09	33.36	33.63	35.24
-0.41667	35.34	35.55	34.8	35.03	38.67	35.57	34.59	35.94	35.12	33.41	33.66	35.22
-0.4	35.34	35.56	34.74	34.95	38.27	35.58	34.57	35.95	35.13	33.61	33.72	35.19
-0.38333	35.32	35.56	34.7	34.76	38.07	35.62	34.55	35.93	35.11	33.7	33.75	35.17
-0.36667	35.3	35.56	34.7	34.63	37.96	35.63	34.54	35.9	35.27	33.81	33.78	35.15
-0.35	35.3	35.56	34.68	34.51	38.01	35.63	34.51	35.88	35.4	33.84	33.79	35.14
-0.33333	35.34	35.56	34.62	34.41	38.17	35.7	34.49	35.87	35.42	33.95	33.79	35.13
-0.31667	35.35	35.56	34.61	34.35	38.54	35.78	34.48	35.83	35.31	34.29	33.77	35.11
-0.3	35.34	35.56	34.62	34.28	38.69	35.83	34.52	35.79	35.29	34.25	33.75	34.94
-0.28333	35.33	35.57	34.62	34.23	38.74	35.85	34.56	35.76	35.29	34.03	33.73	34.88
-0.26667	35.34	35.58	34.63	34.18	38.57	35.83	34.56	35.7	35.27	34.05	33.72	34.88
-0.25	35.33	35.6	34.66	34.12	38.29	35.82	34.56	35.77	35.21	34.12	33.7	34.88
-0.23333	35.3	35.6	34.66	34.07	38.19	35.81	34.56	35.89	35.09	34.13	33.66	35.05
-0.21667	35.26	35.6	34.66	34.04	38.23	35.76	34.57	35.97	34.98	34.11	33.62	35.14
-0.2	35.24	35.6	34.64	33.98	38.31	35.81	34.58	35.97	34.88	34.07	33.58	35.06
-0.18333	35.24	35.6	34.63	33.95	38.42	35.87	34.59	35.92	34.8	33.96	33.53	35.07
-0.16667	35.25	35.59	34.62	33.96	38.49	35.9	34.59	35.74	34.75	33.89	33.49	35.1
-0.15	35.26	35.59	34.59	33.94	38.53	35.91	34.6	35.6	34.75	33.82	33.46	35.49
-0.13333	35.25	35.57	34.54	33.93	38.56	35.93	34.6	35.6	34.73	33.72	33.51	35.69
-0.11667	35.24	35.56	34.5	33.92	38.56	35.95	34.62	35.63	34.69	33.58	33.6	35.81
-0.1	35.28	35.52	34.52	33.91	38.57	35.93	34.97	35.72	34.63	33.58	33.6	35.93
-0.08333	35.3	35.37	34.58	33.94	38.57	35.89	35.04	35.79	34.49	33.64	33.48	35.97
-0.06667	35.28	35.29	34.6	33.94	38.54	35.85	35.02	35.87	34.39	33.61	33.44	36
-0.05	35.23	35.2	34.74	33.91	38.52	35.82	34.98	35.89	34.31	33.62	33.41	36.02
-0.03333	35.23	35.18	34.76	33.9	38.53	35.81	34.94	35.85	34.28	33.65	33.53	36.01
-0.01667	35.25	35.47	34.55	33.9	38.54	35.77	34.92	35.81	34.26	33.68	33.66	35.96
0	35.27	35.57	34.49	33.89	38.53	35.73	34.91	35.79	34.17	33.71	33.71	35.84
0.016667	35.26	35.57	34.52	33.9	38.51	35.72	34.9	35.82	34.1	33.72	33.69	35.78
0.033333	35.26	35.75	34.62	33.9	38.44	35.71	34.89	35.85	34.05	33.72	33.68	35.78
0.05	35.26	35.93	34.6	33.92	38.44	35.67	34.87	35.81	34.1	33.72	33.78	35.79
0.066667	35.21	35.99	34.55	34.18	38.46	35.58	34.83	35.81	34.36	33.78	33.89	35.72
0.083333	35.17	36.08	34.66	34.46	38.49	35.6	34.79	35.94	34.4	33.85	33.95	35.62
0.1	35.11	36.15	34.83	34.85	38.52	35.67	34.77	36	34.46	33.85	34	35.55
0.116667	35.05	36.16	34.89	34.88	38.4	35.81	34.73	35.96	34.47	33.85	34.04	35.53
0.133333	34.99	36.18	34.97	34.96	38.44	35.96	34.71	35.92	34.43	33.91	34.03	35.48
0.15	34.92	36.23	35.09	35.2	38.53	36.1	34.59	35.91	34.44	33.92	34	35.45
0.166667	34.88	36.24	35.18	35.21	38.38	36.13	34.24	35.99	34.56	33.88	33.98	35.43
0.183333	34.8	36.26	35.19	35.1	38.24	36.06	34.22	35.99	34.65	33.89	33.95	35.38
0.2	34.69	36.28	35.07	35.07	38.03	36.14	34.25	35.91	34.81	33.91	33.92	35.33
0.216667	34.67	36.22	35.08	35.23	38.01	36.24	34.29	35.84	34.89	33.92	33.89	35.29
0.233333	34.79	36.2	34.98	35.4	37.98	36.35	34.3	35.78	34.98	33.92	33.85	35.21
0.25	34.85	36.27	35	35.57	37.95	36.35	34.2	35.71	34.92	33.94	33.81	35.27
0.266667	34.86	36.32	35.11	35.77	38.09	36.31	34.42	35.66	34.86	34.41	33.78	35.3
0.283333	34.87	36.32	35.08	35.97	38.18	36.32	35.05	35.67	34.86	34.48	33.76	35.38
0.3	34.85	36.32	35.08	36.01	38.2	36.28	35.62	35.77	34.78	34.45	33.77	35.53
0.316667	34.8	36.34	35.17	36.17	38.03	36.25	35.62	35.78	34.74	34.45	33.75	35.62
0.333333	34.73	36.32	35.28	36.34	37.7	36.29	35.33	35.82	34.73	34.5	33.72	35.67
0.35	34.58	36.2	35.27	36.41	37.57	36.39	35.5	35.99	34.69	34.57	33.71	35.78
0.366667	34.59	36.05	35.19	36.36	37.79	36.38	36.08	36.09	34.58	34.63	33.72	35.87
0.383333	34.77	35.99	35.09	36.36	37.77	36.25	36.1	36.2	34.42	34.69	33.71	35.86
0.4	34.95	36.06	35.1	36.43	37.5	36.09	35.48	36.33	34.37	34.75	33.71	35.84
0.416667	35.05	36.1	35.16	36.44	37.13	36.15	35.48	36.41	34.5	34.84	33.76	35.89
0.433333	35.24	36.01	35.17	36.44	37.06	36.14	35.54	36.43	34.51	34.63	33.84	35.87
0.45	35.43	35.96	35.22	36.52	37.44	36.11	35.39	36.44	34.44	34.49	33.89	35.82
0.466667	35.58	35.96	35.1	36.55	37.6	36.09	35.42	36.42	34.23	34.55	34.02	35.8
0.483333	35.65	35.94	34.95	36.52	37.65	36.03	35.17	36.4	33.98	34.36	34.02	35.78
0.5	35.74	35.86	34.93	36.55	37.44	35.9	34.97	36.4	34	34.28	34.05	35.81
0.516667	35.72	35.75	34.89	36.54	37.26	35.82	34.9	36.43	33.79	34.38	34.14	36.12
0.533333	35.8	35.65	34.8	36.39	37.29	35.79	34.83	36.45	33.51	34.36	34.47	36.13
0.55	35.82	35.52	34.66	36.34	37.38	35.79	34.55	36.41	33.53	34.21	34.73	35.93
0.566667	35.82	35.49	34.6	36.14	37.48	35.77	34.95	36.43	33.93	34.15	34.74	35.81
0.583333	35.93	35.44	34.52	35.98	37.66	35.73	35.41	36.39	34.03	34.32	34.71	36.01
0.6	36.09	35.39	34.43	35.84	37.76	35.62	35.32	36.08	34.05	34.52	34.66	36.04
0.616667	36.09	35.35	34.36	35.58	37.8	35.49	35.19	35.89	34.06	34.54	34.55	35.96
0.633333	35.98	35.29	34.27	35.38	37.81	35.43	35.11	35.95	34.09	34.49	34.49	35.98
0.65	35.91	35.22	34.21	35.39	37.8	35.35	35.22	36.11	34.14	34.31	34.42	36.15
0.666667	35.87	35.17	34.14	35.3	37.77	35.26	35.24	36.18	34.24	34.18	34.38	36.12
0.683333	35.84	35.11	34.06	35.12	37.73	35.3	35.09	36.26	34.38	34.19	34.45	35.85
0.7	35.79	35.07	34.01	35.24	37.68	35.48	34.97	36.32	34.36	34.16	34.44	35.82
0.716667	35.7	35.01	33.96	35.32	37.56	35.51	34.85	36.27	33.85	33.91	34.37	35.88
0.733333	35.68	34.99	33.92	35.44	37.43	35.6	34.72	36.14	33.41	34.11	34.23	35.97
0.75	35.67	34.96	33.87	35.61	37.13	35.76	34.62	36.12	33.16	34.4	34.13	36.17
0.766667	35.7	34.95	33.83	35.74	36.84	35.96	34.62	36.08	32.95	34.34	34.13	36.26
0.783333	35.83	34.93	33.81	35.72	36.69	36.08	34.61	35.96	32.8	34.21	34.08	36.17
0.8	35.83	34.88	33.78	35.55	36.62	36.25	34.56	35.83	32.73	33.99	34	35.98
0.816667	35.78	34.81	33.76	35.37	36.63	36.41	34.61	35.7	32.7	33.78	33.9	35.94
0.833333	35.73	34.78	33.77	35.24	36.67	36.46	34.69	35.55	32.68	33.6	33.73	35.86
0.85	35.64	34.77	33.99	35.01	36.74	36.47	34.72	35.36	32.69	33.44	33.59	35.73
0.866667	35.54	34.72	34.06	34.77	36.8	36.45	34.73	35.21	32.78	33.12	33.42	35.65
0.883333	35.43	34.65	34.12	34.67	36.85	36.49	34.72	35.16	32.91	32.92	33.29	35.57
0.9	35.33	34.64	34.3	34.55	36.89	36.65	34.7	35.06	32.99	33	33.21	35.53
0.916667	35.23	34.63	34.49	34.54	37.11	36.77	34.68	35.02	33.08	33.06	33.1	35.43
0.933333	35.13	34.64	34.68	34.47	37.4	36.74	34.62	34.97	33.1	33.11	32.92	35.39
0.95	35.03	34.69	35.02	34.38	37.41	36.59	34.25	34.8	33.09	33.39	32.79	35.4
0.966667	34.92	34.8	35.25	34.25	37.05	36.52	34.01	34.8	33.04	33.46	32.91	35.46
0.983333	34.8	34.78	35.35	33.95	36.86	36.34	33.63	34.86	32.96	33.38	32.94	35.49
1	34.7	34.76	35.39	33.7	36.81	36.18	33.57	34.85	32.94	33.27	32.78	35.49
1.01667	34.59	34.73	35.43	33.53	36.84	36.08	33.59	34.84	32.94	33.12	32.69	35.49
1.03333	34.44	34.7	35.46	33.4	36.89	35.91	33.61	34.87	32.94	32.96	32.76	35.45
1.05	34.28	34.63	35.48	33.23	36.86	35.85	33.84	34.84	33.06	32.86	32.92	35.37
1.06667	34.21	34.59	35.48	33.11	36.85	35.9	34.13	34.8	33.11	32.85	32.95	35.3
1.08333	34.18	34.54	35.43	33.05	36.83	35.91	34.33	34.74	33.06	32.71	32.96	35.23
1.1	34.15	34.54	35.39	33.02	36.74	35.84	34.35	34.56	32.99	32.58	32.99	35.15
1.11667	34.11	34.54	35.33	32.98	36.69	35.75	34.32	34.41	32.93	32.56	33.02	35.03
1.13333	34.07	34.54	35.33	32.95	36.95	35.7	34.3	34.53	32.8	32.63	33.01	34.9
1.15	34.01	34.49	35.33	32.95	36.97	35.69	34.29	34.68	32.74	32.66	33.03	34.85
1.16667	33.91	34.45	35.03	32.94	36.82	35.67	34.28	34.74	32.74	32.64	33.05	34.87
1.18333	33.84	34.47	34.93	32.85	36.98	35.6	34.3	34.75	32.64	32.57	33.03	34.88
1.2	33.87	34.49	35.01	32.74	37.23	35.5	34.3	34.73	32.54	32.46	33.03	34.86
1.21667	33.91	34.5	35.51	32.75	37.26	35.4	34.26	34.71	32.48	32.4	33.04	34.82
1.23333	33.93	34.61	35.69	32.75	37.21	35.31	34.22	34.69	32.52	32.33	33.02	34.8
1.25	34.01	34.8	35.51	32.73	37.16	35.3	34.21	34.61	32.55	32.17	32.86	34.78
1.26667	34.06	34.89	35.45	32.71	37.17	35.32	34.19	34.58	32.56	32.04	32.87	34.81
1.28333	34.12	34.94	35.52	32.67	37.09	35.33	34.19	34.6	32.57	31.96	32.91	34.81
1.3	34.13	34.97	35.53	32.65	36.98	35.28	34.27	34.61	32.57	31.9	32.95	34.76
1.31667	34.09	35.01	35.49	32.75	36.9	35.24	34.28	34.66	32.57	31.84	33.02	34.84
1.33333	34.05	35.04	35.46	33.01	36.76	35.18	34.26	34.69	32.56	31.76	33.09	34.9
1.35	34.04	35.05	35.46	33.39	36.66	35.15	34.19	34.71	32.57	31.75	33.17	34.95
1.36667	34.03	35.05	35.46	33.57	36.65	35.13	34.21	34.72	32.58	31.81	33.2	34.93
1.38333	34.03	35.04	35.43	33.81	36.64	35.2	34.27	34.73	32.57	31.76	33.22	34.92
1.4	33.98	35.01	35.36	33.97	36.55	35.22	34.29	34.77	32.54	31.59	33.26	34.91
1.41667	33.9	34.98	35.33	34.14	36.5	35.06	34.31	34.92	32.6	31.54	33.32	34.85
1.43333	33.9	34.95	35.27	34.18	36.49	34.9	34.32	35	32.79	31.49	33.34	34.82
1.45	34.01	34.93	35.21	34.28	36.6	34.94	34.32	35.08	32.81	31.5	33.34	34.81
1.46667	34.09	34.92	35.14	34.29	36.93	34.95	34.32	35.13	32.81	31.47	33.33	34.76
1.48333	34.11	34.92	35.12	34.28	37.03	34.89	34.3	35.21	32.87	31.37	33.23	34.75
1.5	34.16	34.9	35.12	34.27	36.96	34.8	34.18	35.25	32.99	31.34	33.27	34.72
1.51667	34.19	34.89	35.1	34.25	36.87	34.74	34.04	35.26	33.11	31.35	33.4	34.66
1.53333	34.19	34.86	35.05	34.17	36.83	34.73	33.64	35.28	33.21	31.39	33.67	34.57
1.55	34.41	34.81	35.01	34.15	36.76	34.7	33.2	35.34	33.28	31.47	33.71	34.52
1.56667	34.67	34.8	34.97	34.09	36.65	34.63	32.76	35.34	33.2	31.49	33.63	34.51
1.58333	34.58	34.84	34.93	34.04	36.54	34.56	32.51	35.32	33.02	31.49	33.65	34.61
1.6	34.51	34.88	34.87	33.99	36.51	34.53	32.6	35.31	33.03	31.51	33.77	34.67
1.61667	34.56	34.9	34.84	33.96	36.51	34.53	33.24	35.42	33.24	31.52	33.85	34.69
1.63333	34.64	34.9	34.83	33.95	36.57	34.57	33.65	35.53	33.38	31.5	34.02	34.67
1.65	34.75	34.81	34.81	33.89	36.84	34.47	34.36	35.63	33.44	31.43	34.3	34.56
1.66667	34.94	34.68	34.79	33.83	37.01	34.29	34.81	35.78	33.56	31.34	34.23	34.58
1.68333	35.07	34.63	34.77	33.82	36.96	34.16	35.08	35.89	33.53	31.28	34.2	34.62
1.7	35.08	34.63	34.72	33.87	36.85	34.14	35.15	35.92	33.64	31.25	34.36	34.59
1.71667	35.1	34.63	34.67	33.87	36.81	34.08	35.22	35.92	33.82	31.34	34.46	34.63
1.73333	35.15	34.62	34.62	33.85	36.72	34	35.25	35.98	33.86	31.49	34.63	34.66
1.75	35.29	34.67	34.59	33.85	36.58	34.28	35.36	36.05	33.86	31.49	34.57	34.63
1.76667	35.33	34.68	34.56	33.84	36.5	34.52	35.36	36.11	33.83	31.6	34.52	34.6
1.78333	35.35	34.63	34.53	33.84	36.5	34.64	35.2	36.13	33.77	32.08	34.67	34.62
1.8	35.47	34.62	34.54	33.84	36.52	34.72	35.05	36.2	33.64	32.32	34.78	34.69
1.81667	35.5	34.69	34.54	33.85	36.57	34.76	35.14	36.38	33.51	32.31	34.8	34.69
1.83333	35.46	34.68	34.59	33.88	36.58	34.8	35.42	36.43	33.33	32.32	34.79	34.64
1.85	35.48	34.62	34.66	33.92	36.54	34.78	35.55	36.28	33.18	32.33	34.75	34.53
1.86667	35.52	34.62	34.65	33.93	36.6	34.67	35.6	36.07	33.09	32.34	34.61	34.31
1.88333	35.55	34.87	34.61	34.02	36.64	34.62	35.56	36	33.04	32.37	34.47	34.13
1.9	35.64	35.06	34.57	34.1	36.58	34.71	35.46	35.86	32.99	32.38	34.47	34.15
1.91667	35.73	35.26	34.53	34.07	36.63	34.82	35.35	35.73	32.91	32.36	34.66	34.21
1.93333	35.75	35.45	34.51	34.02	36.66	34.89	35.29	35.8	32.8	32.21	34.66	34.25
1.95	35.69	35.67	34.48	34.16	36.66	34.97	35.23	35.78	32.87	32.08	34.51	34.32
1.96667	35.8	35.84	34.47	34.31	36.65	35	35.24	35.64	32.89	32.07	34.28	34.58
1.98333	35.83	35.93	34.6	34.36	36.66	34.99	35.23	35.47	32.87	32.13	34	34.67
2	35.79	35.95	34.75	34.34	36.69	35	35.18	35.27	32.86	32.14	33.79	34.78
2.01667	35.78	35.55	34.65	34.23	36.69	35.08	35.13	35.06	32.85	32.17	33.75	34.86
2.03333	35.76	34.69	34.39	34.14	36.66	35.12	35.07	34.81	32.86	32.21	33.69	34.92
2.05	35.68	34.49	34.44	33.99	36.63	35.14	35.02	34.57	32.99	32.23	33.58	34.98
2.06667	35.6	33.98	34.69	34.02	36.59	35.12	34.99	34.43	33.13	32.19	33.45	35.02
2.08333	35.51	33.6	34.55	34.04	36.58	35.02	34.94	34.33	33.01	32.06	33.09	35.06
2.1	35.4	33.53	34.63	34.02	36.54	34.97	34.89	34.2	32.78	32.08	32.95	35.07
2.11667	35.28	33.5	34.94	33.99	36.49	35.02	34.86	34.13	32.64	32.24	32.95	34.99
2.13333	35.18	33.52	35	33.94	36.45	35.26	34.83	34.19	32.59	32.46	32.99	34.86
2.15	35.08	33.79	35.18	33.9	36.39	35.47	34.78	34.23	32.58	32.58	33.04	34.61
2.16667	35.09	33.91	35.28	33.85	36.33	35.65	34.76	34.21	32.58	32.58	33.05	34.48
2.18333	35.09	33.86	35.32	33.84	36.29	35.75	34.75	34.3	32.58	32.43	33.05	34.37
2.2	35.06	34.16	35.53	33.88	36.26	36.05	34.74	34.38	32.59	32.25	33.04	34.58
2.21667	35	35.55	35.54	33.9	36.24	36.12	34.72	34.51	32.63	32.28	33.03	34.9
2.23333	34.92	35.99	35.57	33.95	36.26	36.13	34.69	34.5	32.63	32.35	33.01	34.96
2.25	34.82	35.93	35.51	34.03	36.29	36.14	34.68	34.35	32.64	32.31	32.99	35.03
2.26667	34.73	35.34	35.09	34.12	36.3	36.17	34.69	34.23	32.66	32.29	32.96	35.29
2.28333	34.73	34.19	35	34.23	36.52	36.13	34.7	34.22	32.72	32.3	32.92	35.45
2.3	34.82	33.78	35.38	34.28	37.01	36.37	34.7	34.21	32.76	32.29	32.89	35.5
2.31667	34.91	33.61	35.5	34.45	37.22	36.77	34.68	34.2	32.83	32.3	32.86	35.51
2.33333	34.94	33.57	35.78	34.93	37.15	36.73	34.66	34.21	32.83	32.33	32.79	35.55
2.35	34.94	33.56	36	35	36.84	36.4	34.61	34.23	32.81	32.33	32.66	35.59
2.36667	34.89	33.56	35.97	35.03	37.16	36.27	34.55	34.25	32.78	32.36	32.65	35.59
2.38333	34.83	33.59	35.93	35.15	37.18	35.92	34.48	34.29	32.73	32.36	32.66	35.5
2.4	34.79	33.59	35.95	35.28	37.05	35.75	34.4	34.34	32.55	32.35	32.66	35.59
2.41667	34.74	33.54	36	35.33	36.89	35.72	34.45	34.32	32.53	32.33	32.63	35.75
2.43333	34.67	33.4	36.01	35.47	36.79	35.5	34.53	34.29	32.61	32.32	32.6	35.75
2.45	34.64	33.16	35.99	35.52	36.65	35.27	34.54	34.33	32.65	32.29	32.57	35.78
2.46667	34.62	33.12	35.91	35.32	36.53	35.3	34.52	34.38	32.76	32.15	32.52	35.84
2.48333	34.59	33.27	35.92	35.06	36.45	35.34	34.48	34.39	32.84	32.09	32.47	35.82
2.5	34.56	33.5	35.97	35.02	36.39	35.38	34.41	34.36	32.88	32.1	32.44	35.79
2.51667	34.49	33.7	36.02	34.98	36.34	35.37	34.43	34.29	32.9	32.14	32.42	35.76
2.53333	34.33	34.32	36.03	34.82	36.27	35.32	34.44	34.27	33.22	32.21	32.42	35.66
2.55	34.25	34.39	36.02	34.79	36.37	35.45	34.44	34.25	33.43	32.24	32.4	35.6
2.56667	34.21	34.05	36.06	34.97	36.44	35.6	34.43	34.21	33.43	32.22	32.37	35.85
2.58333	34.16	33.88	36.12	35.16	36.43	35.59	34.38	34.15	33.32	32.17	32.34	36.14
2.6	34.2	33.85	36.24	35.2	36.42	35.58	34.27	34.14	33.34	32.07	32.32	36.19
2.61667	34.31	33.71	36.29	35.21	36.46	35.58	34.27	34.09	33.41	32.1	32.28	36.2
2.63333	34.34	33.45	36.32	35.22	36.59	35.56	34.34	34.05	33.41	32.11	32.25	36.15
2.65	34.34	33.88	36.22	35.18	37.15	35.52	34.4	34.08	33.37	32.11	32.25	36.11
2.66667	34.31	34.23	36.2	35.1	37.44	35.45	34.44	34.13	33.3	32.29	32.27	36.16
2.68333	34.26	34.26	36.27	34.92	37.48	35.38	34.45	34.21	33.3	32.49	32.27	36.15
2.7	34.2	33.95	36.13	34.72	37.45	35.3	34.47	34.32	33.23	32.53	32.23	36.01
2.71667	34.21	34.02	35.95	34.52	37.6	35.19	34.53	34.56	33.16	32.48	32.21	35.9
2.73333	34.24	34.07	35.83	34.31	37.76	35.1	34.55	34.82	33.01	32.42	32.26	35.83
2.75	34.32	34.08	35.83	34.19	37.72	35.1	34.59	34.87	32.78	32.5	32.36	35.72
2.76667	34.37	34.08	35.88	34.15	37.42	35.09	34.58	35.09	32.93	32.59	32.43	35.8
2.78333	34.37	34.08	35.87	34.11	37.16	35.04	34.55	35.26	33	32.66	32.53	36.14
2.8	34.41	34.06	35.81	34.1	37.26	34.99	34.56	35.38	32.95	32.66	32.52	36.27
2.81667	34.77	34	35.7	34.07	37.31	34.98	34.62	35.46	32.96	32.73	32.4	36.24
2.83333	34.96	34.05	35.58	34.05	37.19	34.96	34.66	35.59	32.96	32.86	32.23	36.07
2.85	34.99	34.2	35.54	34.06	36.63	34.91	34.74	35.8	32.97	32.97	32.23	35.93
2.86667	34.96	34.22	35.53	34.1	36.61	34.86	34.78	35.94	32.97	33.09	32.27	35.79
2.88333	34.94	34.21	35.48	34.09	36.97	34.8	34.82	35.97	32.97	33.23	32.32	35.67
2.9	34.93	34.16	35.42	34.04	37.16	34.7	34.76	35.98	32.97	33.4	32.43	35.54
2.91667	34.93	34.1	35.4	33.95	37.22	34.64	34.65	36.02	32.99	33.53	32.51	35.48
2.93333	34.89	34.07	35.35	33.84	37.17	34.63	34.89	36.01	33	33.49	32.54	35.44
2.95	34.84	34.06	35.25	33.67	37.14	34.65	35.13	35.91	32.96	33.47	32.55	35.4
2.96667	34.77	34.05	35.22	33.66	37.49	34.6	35.28	35.88	32.94	33.48	32.53	35.35
2.98333	34.72	34.02	35.19	33.78	37.53	34.55	35.4	35.84	32.92	33.49	32.48	35.26
3	34.67	34.01	35.18	33.8	37.48	34.53	35.53	35.78	32.91	33.48	32.54	35.14
3.01667	34.6	33.99	35.17	33.79	37.44	35.09	35.65	35.69	32.9	33.41	32.65	35.04
3.03333	34.53	33.98	35.11	33.79	37.25	35.45	35.75	35.64	32.9	33.23	32.68	35.03
3.05	34.48	33.97	34.86	33.75	37	35.56	35.84	35.5	32.91	33.12	32.59	34.98
3.06667	34.43	33.97	34.87	33.59	36.82	35.59	35.87	35.41	32.95	33.13	32.61	34.93
3.08333	34.47	33.92	35.35	33.55	36.9	35.46	35.9	35.32	32.95	33.17	33.22	35.02
3.1	34.53	33.91	35.91	33.53	37.16	35.26	35.91	35.27	32.93	33.18	33.46	35.1
3.11667	34.57	33.94	35.99	33.55	37.41	35.21	35.95	35.19	32.91	33.15	33.76	35.09
3.13333	34.64	33.98	36.1	33.56	37.5	35.22	36	35.09	32.9	33.21	33.99	35.08
3.15	34.7	34.01	36.2	33.52	37.23	35.18	35.99	34.98	32.91	33.33	34.11	35.01
3.16667	34.73	34.04	36.32	33.5	36.98	35.11	35.91	34.86	32.91	33.61	34.15	34.94
3.18333	34.71	34.01	36.38	33.52	36.92	35.12	35.79	34.92	32.93	33.74	34.16	34.92
3.2	34.6	33.96	36.38	33.59	36.68	35.13	35.72	35.12	33.21	33.64	34.22	34.91
3.21667	34.55	33.92	36.4	33.64	36.81	35.13	35.73	35.19	33.37	33.54	34.26	34.91
3.23333	34.61	33.88	36.26	33.61	36.9	35.13	35.73	35.2	33.39	33.52	34.25	34.9
3.25	34.64	33.83	35.6	33.48	36.86	35.09	35.7	35.19	33.37	33.64	34.2	34.88
3.26667	34.64	33.76	35.4	33.35	36.64	35.08	35.73	35.13	33.38	33.81	34.15	34.84
3.28333	34.64	33.65	35.43	33.34	36.78	35.08	35.75	35.13	33.46	33.8	34.07	34.79
3.3	34.64	33.53	35.42	33.39	37	35.07	35.91	35.15	33.49	33.73	33.98	34.71
3.31667	34.63	33.39	35.4	33.54	37.17	35.06	36.01	35.24	33.55	33.6	34.09	34.71
3.33333	34.61	33.32	35.44	33.66	37.37	35.06	36.03	35.29	33.67	33.39	34.36	34.72
3.35	34.55	33.29	35.45	33.52	37.42	35.07	36.01	35.29	33.62	33.49	34.34	34.68
3.36667	34.55	33.23	35.41	33.54	37.34	35.12	36.09	35.23	33.34	33.66	34.22	34.67
3.38333	34.6	33.18	35.44	33.59	37.14	35.17	36.09	35.09	33.2	33.72	34.13	34.73
3.4	34.63	33.16	35.4	33.69	36.83	35.21	36.06	34.92	33.28	33.74	33.98	34.74
3.41667	34.65	33.14	35.22	33.82	36.91	35.29	36.07	34.88	33.42	33.84	33.8	34.73
3.43333	34.73	33.84	35.23	33.9	37.36	35.36	36.06	34.88	33.53	33.83	33.73	34.71
3.45	34.77	33.92	35.24	33.99	37.69	35.38	35.91	34.85	33.58	33.78	33.64	34.69
3.46667	34.76	33.83	35.21	34.1	37.83	35.4	35.68	34.89	33.61	33.76	33.55	34.67
3.48333	34.68	33.73	35.16	34.28	37.78	35.46	35.58	34.9	33.65	33.77	33.39	34.66
3.5	34.68	33.74	35.06	34.6	37.55	35.71	35.66	34.86	33.61	33.72	33.23	34.63
3.51667	34.78	33.75	34.94	34.73	37.29	35.74	35.65	34.87	33.42	33.61	33.11	34.61
3.53333	34.78	33.79	34.79	34.76	37.28	35.53	35.51	35.07	33.16	33.49	33	34.59
3.55	34.53	33.8	34.68	34.7	37.32	35	35.35	35.31	32.98	33.47	32.96	34.53
3.56667	33.45	33.81	34.61	34.57	37.3	34.92	35.2	35.6	32.9	33.42	33	34.41
3.58333	33.35	33.83	34.53	34.56	37.28	35.63	35.06	35.52	32.96	33.32	33.12	34.32
3.6	33.73	33.85	34.44	34.57	37.28	36.4	34.99	35.14	32.94	33.22	33.17	34.24
3.61667	34.83	33.87	34.36	34.53	37.18	36.68	34.98	35.17	32.88	33.18	33.18	34.16
3.63333	35.37	33.88	34.28	34.46	37.04	36.76	34.98	35.24	32.84	33.15	33.17	34.19
3.65	35.47	33.88	34.2	34.41	36.98	36.8	34.94	35.28	32.8	33.11	33.08	34.35
3.66667	35.55	33.88	34.1	34.38	36.89	36.79	34.89	35.28	32.72	32.83	33.05	34.42
3.68333	35.64	33.89	34.07	34.38	36.78	36.78	34.84	35.37	32.49	32.6	33.02	34.48
3.7	35.67	34.19	34.07	34.36	36.65	36.76	34.8	35.43	32.35	32.35	33	34.56
3.71667	35.75	34.66	34.04	34.35	36.56	36.34	34.76	35.43	32.32	32.2	32.99	34.62
3.73333	35.76	34.76	33.96	34.34	36.5	35.97	34.74	35.42	32.32	32.07	32.94	34.66
3.75	35.64	34.82	33.88	34.32	36.34	35.75	34.75	35.54	32.32	31.89	32.89	34.69
3.76667	35.56	34.85	33.81	34.32	36.23	35.4	34.76	35.83	32.38	31.71	32.84	34.7
3.78333	35.61	34.84	33.75	34.3	36.13	35.29	34.76	35.83	32.42	31.66	32.77	34.72
3.8	35.55	34.84	33.7	34.27	36.1	35.23	34.76	35.77	32.48	31.6	32.68	34.91
3.81667	35.35	34.83	33.67	34.2	36.29	35.26	34.77	35.74	32.49	31.55	32.62	34.89
3.83333	35.44	34.88	33.63	34.03	36.23	35.24	34.83	35.69	32.49	31.5	32.58	34.74
3.85	35.58	35.31	33.6	34.01	36.15	35.1	34.85	35.64	32.48	31.42	32.55	34.8
3.86667	35.64	35.35	33.6	34.03	36.16	34.96	34.86	35.63	32.45	31.35	32.52	34.88
3.88333	35.58	35.13	33.61	34.04	36.19	34.96	34.85	35.57	32.4	31.3	32.67	34.96
3.9	35.53	35.08	33.59	34.04	36.17	35.01	34.83	35.53	32.3	31.23	32.7	35.04
3.91667	35.61	35.53	33.55	34.03	36.11	34.92	34.87	35.48	32.22	31.17	32.7	35.05
3.93333	35.6	35.93	33.53	34.03	36.04	34.81	34.93	35.41	32.22	31.11	32.7	35.04
3.95	35.48	36.23	33.51	34	35.98	34.69	34.95	35.36	32.21	31.08	32.68	35.04
3.96667	35.37	36.37	33.48	33.96	35.96	34.57	34.93	35.3	32.11	31.05	32.63	34.99
3.98333	35.3	36.37	33.46	33.94	36.02	34.52	34.82	35.21	31.97	31.03	32.61	34.98
4	35.23	36.3	33.45	33.93	36.01	34.46	34.77	35.15	31.91	30.99	32.71	35.02
4.01667	35.04	36.29	33.44	33.91	35.98	34.51	34.77	35.13	31.88	30.9	32.85	35.04
4.03333	34.82	36.3	33.44	33.88	35.97	34.55	34.74	35.1	31.92	30.82	32.87	35.05
4.05	34.71	36.26	33.43	33.83	35.94	34.51	34.69	35	31.94	30.81	32.87	35.05
4.06667	34.59	36.23	33.4	33.69	35.93	34.45	34.7	34.91	31.94	30.88	32.85	35.06
4.08333	34.49	36.25	33.36	33.72	36.23	34.35	34.72	34.9	31.97	30.93	32.84	35.11
4.1	34.42	36.3	33.31	33.75	36.24	34.26	34.72	34.83	32.04	30.96	32.88	35.13
4.11667	34.32	36.28	33.29	33.76	36.2	34.2	34.65	34.62	32.24	31.01	32.9	35.13
4.13333	34.22	36.38	33.3	33.78	36.19	34.17	34.6	34.65	32.47	31.03	32.9	35.14
4.15	34.18	36.61	33.47	33.74	36.24	34.14	34.59	34.74	32.72	31.07	32.9	35.24
4.16667	34.1	36.69	33.51	33.68	36.77	34.09	34.56	34.87	32.89	31.15	32.88	35.31
4.18333	34.04	36.66	33.6	33.81	37.21	34.09	34.7	34.94	32.93	31.2	32.85	35.35
4.2	34.03	36.67	33.8	33.84	37.53	34.13	34.9	34.99	33.05	31.26	32.8	35.36
4.21667	34.06	36.67	34.02	33.94	37.72	34.26	35.02	34.98	33.2	31.41	32.76	35.4
4.23333	34.08	36.7	34.26	34.28	37.82	34.22	35.24	34.97	33.32	31.62	32.76	35.59
4.25	34.11	36.81	34.41	34.56	37.84	34.18	35.66	34.96	33.44	31.78	32.8	35.69
4.26667	34.18	36.79	34.45	34.94	37.85	34.15	36.07	34.93	33.52	31.91	32.8	35.85
4.28333	34.21	36.75	34.48	35.51	37.94	34.12	36.16	34.92	33.52	32	32.81	35.88
4.3	34.26	36.79	34.66	35.68	37.99	34.5	36.2	34.87	33.54	32.11	32.85	36.11
4.31667	34.3	36.84	34.96	35.89	38.07	34.56	36.27	34.73	33.67	32.24	32.91	36.22
4.33333	34.35	36.9	35.72	36.07	38.14	34.64	36.24	34.63	33.75	32.31	33.06	36.27
4.35	34.39	36.9	36.17	36.04	38.15	34.8	36.07	34.59	34.08	32.35	33.14	36.27
4.36667	34.4	36.89	36.38	35.87	38.03	34.85	35.98	34.65	34.06	32.41	33.17	35.97
4.38333	34.39	36.87	36.49	35.69	38.05	34.97	36.13	34.93	33.89	32.48	33.18	35.96
4.4	34.45	36.8	36.59	35.59	38.18	35.09	36.22	35.14	33.85	32.6	33.21	36.05
4.41667	34.53	36.75	36.66	35.52	38.28	35.34	36.37	35.31	34.08	32.67	33.26	36.12
4.43333	34.63	36.76	36.62	35.48	38.35	35.4	36.53	35.54	34.3	32.68	33.24	36.16
4.45	34.71	36.77	36.45	35.45	38.3	35.18	36.56	35.62	34.53	32.67	33.28	36.22
4.46667	34.72	36.76	36.32	35.37	38.28	35.15	36.54	36.02	34.64	32.66	33.29	36.19
4.48333	34.74	36.75	36.3	35.22	38.44	35.47	36.53	36.27	34.72	32.72	33.25	36.09
4.5	34.73	36.72	36.28	35.14	38.52	35.54	36.52	36.34	34.81	32.82	33.27	35.95
4.51667	34.67	36.7	36.15	35.12	38.59	35.87	36.51	36.41	34.86	32.92	33.27	35.87
4.53333	34.64	36.67	36.07	35.09	38.63	36.17	36.28	36.5	34.88	32.96	33.25	35.86
4.55	34.63	36.6	36.08	35.13	38.69	36.28	36.15	36.54	34.89	32.98	33.28	35.88
4.56667	34.66	36.52	36.11	35.2	38.73	36.33	36.01	36.51	34.93	33.04	33.38	35.84
4.58333	34.68	36.44	36.13	35.29	38.7	36.47	35.89	36.5	34.93	33.18	33.57	35.95
4.6	34.69	36.4	36.15	35.31	38.68	36.76	35.94	36.45	34.94	33.58	33.66	35.98
4.61667	34.73	36.36	36.19	35.32	38.74	36.94	35.98	36.87	34.97	33.79	33.67	35.97
4.63333	34.75	36.36	36.2	35.31	38.76	36.94	36.12	37.01	34.97	34.02	33.65	36.01
4.65	34.78	36.36	36.17	35.28	38.67	37.11	36.26	36.82	34.97	34.13	33.62	36.34
4.66667	34.78	36.36	36.09	35.2	38.59	37.37	36.3	36.79	34.97	34.18	33.67	36.46
4.68333	34.77	36.4	35.86	35.14	38.56	37.45	36.31	36.8	34.97	34.21	33.74	36.6
4.7	34.9	36.48	35.61	35.12	38.41	37.42	36.3	36.71	34.97	34.24	33.79	36.67
4.71667	34.94	36.49	35.51	35.1	38.23	37.28	36.29	36.43	34.97	34.27	33.83	36.8
4.73333	34.99	36.49	35.37	35.09	38.09	37.18	36.23	36.41	34.96	34.29	33.86	36.8
4.75	35.02	36.49	35.08	35.07	37.99	37.04	36.15	36.78	34.97	34.29	33.89	36.77
4.76667	35.03	36.52	34.94	35.01	37.87	37.04	36.07	37.03	34.97	34.26	33.9	36.75
4.78333	35.05	36.57	34.95	34.96	37.85	37.05	35.99	37.11	34.97	33.98	33.9	36.69
4.8	35.08	36.62	35	34.93	37.88	37.02	35.94	37.14	34.96	33.87	33.88	36.56
4.81667	35.08	36.65	35.22	34.91	37.97	36.97	35.9	37.18	34.95	33.79	33.84	36.47
4.83333	35.09	36.65	35.37	34.89	38.22	36.95	35.88	37.29	34.95	33.77	33.82	36.39
4.85	35.2	36.66	35.44	34.85	38.32	36.96	35.85	37.37	34.95	33.76	33.78	36.41
4.86667	35.28	36.66	35.45	34.83	38.35	36.92	35.81	37.39	34.94	33.77	33.74	36.48
4.88333	35.32	36.66	35.4	34.82	38.38	36.69	35.75	37.31	34.94	33.81	33.74	36.46
4.9	35.33	36.66	35.31	34.81	38.38	36.57	35.68	37.14	34.94	33.83	33.77	36.31
4.91667	35.39	36.66	35.24	34.83	38.37	36.69	35.6	37.06	34.91	33.82	33.8	36.25
4.93333	35.45	36.69	35.14	34.83	38.36	36.7	35.62	36.97	34.89	33.86	33.86	36.29
4.95	35.43	36.7	34.99	34.77	38.38	36.75	35.77	36.73	34.89	34.19	33.92	36.17
4.96667	35.37	36.7	34.82	34.74	38.41	36.77	35.88	36.6	34.89	34.43	33.98	35.93
4.98333	35.31	36.69	34.64	34.81	38.3	36.72	35.92	36.52	34.91	34.28	34	35.85
5	35.27	36.68	34.56	34.99	38.19	36.65	36.03	36.61	34.96	34.16	33.99	35.95
5.01667	35.23	36.67	34.47	35.14	38.16	36.57	36.19	36.68	34.97	34.19	33.96	35.99
5.03333	35.21	36.66	34.32	35.16	38.15	36.5	36.31	36.62	35.01	34.3	33.91	36.03
5.05	35.2	36.65	34.16	35.28	38.16	36.44	36.38	36.53	35.1	34.33	33.84	36.05
5.06667	35.19	36.65	34.03	35.37	38.27	36.41	36.36	36.46	35.16	34.34	33.77	36.09
5.08333	35.19	36.65	33.94	35.36	38.38	36.37	36.28	36.4	35.25	34.33	33.71	36.12
5.1	35.24	36.65	33.9	35.35	38.6	36.34	36.38	36.27	35.36	34.33	33.65	36.14
5.11667	35.29	36.63	33.86	35.31	38.6	36.3	36.41	36.11	35.26	34.33	33.62	36.15
5.13333	35.42	36.61	33.8	35.24	38.57	36.27	36.41	35.95	35.15	34.33	33.57	36.15
5.15	35.45	36.6	33.75	35.12	38.52	36.31	36.38	35.76	35.25	34.32	33.51	36.16
5.16667	35.45	36.59	33.68	35.01	38.44	36.32	36.31	35.68	35.42	34.29	33.45	36.15
5.18333	35.44	36.58	33.6	34.92	38.41	36.29	36.35	35.68	35.51	34.27	33.5	36.1
5.2	35.45	36.58	33.51	34.84	38.4	36.26	36.55	35.65	35.49	34.26	33.62	36.06
5.21667	35.44	36.56	33.44	34.81	38.4	36.23	36.7	35.58	35.42	34.26	33.67	36.02
5.23333	35.45	36.56	33.36	34.92	38.4	36.2	36.59	35.51	35.57	34.27	33.69	35.99
5.25	35.47	36.56	33.37	35.06	38.39	36.14	36.63	35.53	35.82	34.29	33.71	35.94
5.26667	35.51	36.58	33.42	35.09	38.39	36.09	36.65	35.59	35.95	34.27	33.72	35.91
5.28333	35.53	36.73	33.48	35.08	38.44	36.07	36.36	35.61	35.86	34.22	33.72	35.91
5.3	35.6	36.77	33.53	35.1	38.44	36.1	36	35.6	35.85	34.2	33.71	35.94
5.31667	35.78	36.95	33.56	35.15	38.32	36.23	35.87	35.62	35.99	34.19	33.7	35.94
5.33333	35.86	37.16	33.58	35.1	38.31	36.27	35.94	35.76	36.06	34.16	33.69	35.99
5.35	35.86	37.24	33.58	35.12	38.32	36.28	36.13	35.84	36.03	34.17	33.67	36.08
5.36667	35.89	37.17	33.55	35.31	38.34	36.26	36.27	35.84	35.98	34.2	33.66	36.09
5.38333	36.01	37.17	33.54	35.52	38.36	36.24	36.42	35.79	35.94	34.19	33.63	36.09
5.4	36.14	37.2	33.53	35.7	38.37	36.23	36.49	35.77	35.91	34.11	33.7	36.07
5.41667	36.27	37.29	33.51	35.81	38.39	36.22	36.5	35.68	35.8	34.06	33.7	36.06
5.43333	36.4	37.29	33.52	35.88	38.38	36.2	36.48	35.64	35.61	34.02	33.59	36.06
5.45	36.57	37.27	33.56	35.9	38.27	36.15	36.43	35.68	35.48	33.98	33.57	36.06
5.46667	36.64	37.29	33.56	35.86	38.17	36.1	36.37	35.71	35.47	33.93	33.58	36.07
5.48333	36.69	37.32	33.54	35.82	38.08	36.07	36.31	35.69	35.72	33.91	33.57	36.07
5.5	36.74	37.32	33.52	35.75	38.11	36.05	36.24	35.71	35.85	33.93	33.63	36.06
5.51667	36.78	37.31	33.52	35.69	38.36	36.02	36.15	35.77	35.87	33.95	33.89	36.06
5.53333	36.79	37.3	33.51	35.63	38.6	36.01	36.06	35.78	35.85	33.95	34.01	36.07
5.55	36.84	37.31	33.51	35.59	38.58	36.07	36.01	35.82	35.73	33.96	34.02	36.11
5.56667	36.95	37.31	33.52	35.57	38.54	36.16	35.95	35.85	35.57	33.96	34.01	36.11
5.58333	36.87	37.29	33.52	35.55	38.53	36.18	35.89	35.85	35.51	33.96	34.04	36.11
5.6	36.84	37.24	33.54	35.53	38.52	36.17	35.83	35.81	35.45	34.05	34.02	36.09
5.61667	36.84	37.16	33.66	35.52	38.5	36.2	35.77	35.8	35.43	34.29	33.92	36.08
5.63333	36.78	37.12	33.74	35.53	38.45	36.18	35.72	35.93	35.44	34.55	33.82	36.07
5.65	36.7	37.07	33.82	35.51	38.37	36.16	35.66	35.95	35.47	34.63	33.76	36.04
5.66667	36.74	37.03	33.86	35.48	38.27	36.15	35.65	35.89	35.48	34.64	33.74	36.01
5.68333	36.97	36.99	33.9	35.47	38.24	36.12	35.67	35.85	35.49	34.54	33.68	35.93
5.7	37.04	36.96	33.92	35.46	38.24	36.09	35.66	35.81	35.49	34.48	33.62	35.81
5.71667	37	36.92	33.94	35.44	38.26	36.04	35.64	35.7	35.61	34.45	33.57	35.82
5.73333	36.87	36.87	33.96	35.46	38.26	36	35.61	35.61	35.82	34.4	33.58	35.83
5.75	36.76	36.78	33.99	35.48	38.26	35.94	35.55	35.59	35.84	34.35	33.58	35.85
5.76667	36.67	36.67	34.04	35.43	38.25	35.9	35.52	35.63	35.84	34.34	33.57	35.93
5.78333	36.58	36.57	34.03	35.24	38.25	35.91	35.49	35.64	35.82	34.41	33.55	35.92
5.8	36.52	36.46	34.03	35.05	38.23	35.91	35.47	35.66	35.81	34.43	33.54	35.86
5.81667	36.47	36.38	34.12	34.92	38.2	35.83	35.45	35.79	35.8	34.42	33.51	35.84
5.83333	36.42	36.36	34.21	34.83	38.14	35.77	35.42	35.84	35.8	34.44	33.51	35.89
5.85	36.36	36.39	34.3	34.75	38.12	35.74	35.41	35.93	35.78	34.44	33.54	35.97
5.86667	36.3	36.43	34.37	34.67	38.12	35.73	35.4	35.94	35.76	34.41	33.57	36.07
5.88333	36.24	36.43	34.41	34.6	38.11	35.79	35.41	35.92	35.72	34.47	33.61	36.15
5.9	36.18	36.43	34.44	34.54	38.17	35.79	35.45	35.88	35.69	34.72	33.76	36.2
5.91667	36.12	36.39	34.48	34.52	38.34	35.79	35.46	35.82	35.54	34.83	33.86	36.22
5.93333	36.07	36.37	34.58	34.53	38.45	35.8	35.46	35.77	35.42	34.83	33.89	36.23
5.95	36.01	36.37	34.65	34.54	38.48	35.8	35.45	35.66	35.35	34.75	33.87	36.25
5.96667	35.97	36.38	34.67	34.54	38.48	35.8	35.44	35.62	35.17	34.59	33.69	36.25
5.98333	35.91	36.38	34.71	34.53	38.52	35.8	35.42	35.64	35.11	34.44	33.71	36.25
6	35.86	36.37	34.86	34.49	38.47	35.78	35.43	35.61	35.09	34.43	33.75	36.07
6.01667	35.82	36.34	34.88	34.45	38.28	35.73	35.45	35.59	35.1	34.46	33.67	35.86
6.03333	35.77	36.35	35.15	34.4	38.21	35.85	35.45	35.66	35.16	34.6	33.52	35.73
6.05	35.75	36.37	35.51	34.35	38.13	35.91	35.45	35.7	35.21	34.7	33.51	35.76
6.06667	35.74	36.37	35.64	34.3	38.18	35.88	35.43	35.77	35.26	34.84	33.48	35.81
6.08333	35.76	36.37	35.75	34.27	38.29	35.82	35.41	35.89	35.3	34.94	33.51	35.99
6.1	35.79	36.35	35.73	34.27	38.38	35.78	35.41	36.05	35.37	34.99	33.59	36.09
6.11667	35.82	36.3	35.59	34.35	38.55	35.83	35.42	36.3	35.46	35.01	33.65	36.12
6.13333	35.91	36.23	35.58	34.39	38.58	35.87	35.43	36.55	35.56	34.99	33.65	36.12
6.15	35.95	36.2	35.73	34.42	38.59	35.85	35.4	36.69	35.6	34.94	33.58	36.11
6.16667	35.94	36.16	35.82	34.44	38.59	35.84	35.27	36.71	35.61	34.87	33.76	36.08
6.18333	35.91	36.1	35.93	34.44	38.54	35.83	35.27	36.73	35.61	34.87	33.87	36.02
6.2	35.93	36.05	35.89	34.44	38.53	35.81	35.4	36.76	35.61	34.8	33.9	35.94
6.21667	35.97	36.01	35.95	34.42	38.53	35.77	35.64	36.74	35.61	34.79	33.89	35.93
6.23333	35.98	35.97	36.27	34.4	38.67	35.74	35.74	36.78	35.61	35.02	33.87	35.95
6.25	35.97	35.96	36.39	34.37	38.75	35.73	35.79	36.9	35.61	35.1	33.85	35.92
6.26667	35.95	35.91	36.45	34.37	38.89	35.72	35.87	36.87	35.61	35.11	33.81	35.83
6.28333	35.93	35.86	36.51	34.37	39.08	35.72	35.88	36.73	35.61	35.08	33.76	35.76
6.3	35.9	35.82	36.61	34.36	39.23	35.71	35.86	36.72	35.6	35.04	33.68	35.76
6.31667	35.86	35.77	36.7	34.4	39.34	35.79	35.83	36.78	35.59	34.97	33.6	35.76
6.33333	35.82	35.76	36.58	34.44	39.4	36.01	35.82	36.88	35.58	34.89	33.57	35.75
6.35	35.79	35.74	36.35	34.44	39.43	36.13	35.79	36.92	35.55	34.79	33.57	35.75
6.36667	35.76	35.69	36.18	34.4	39.44	36.21	35.59	36.81	35.51	34.68	33.55	35.74
6.38333	35.74	35.67	36.06	34.36	39.43	36.38	35.4	36.74	35.46	34.53	33.54	35.78
6.4	35.73	35.66	36.06	34.31	39.41	36.5	35.45	36.71	35.43	34.44	33.51	35.85
6.41667	35.73	35.65	36.09	34.27	39.41	36.47	35.44	36.69	35.38	34.37	33.47	35.83
6.43333	35.74	35.65	36.14	34.19	39.39	36.45	35.44	36.64	35.35	34.27	33.44	35.71
6.45	35.75	35.66	36.21	34.25	39.35	36.57	35.53	36.52	35.33	34.24	33.42	35.61
6.46667	35.74	35.67	36.2	34.35	39.33	36.84	35.63	36.46	35.32	34.22	33.4	35.57
6.48333	35.73	35.77	36.18	34.36	39.28	36.92	35.55	36.51	35.34	34.16	33.36	35.54
6.5	35.73	35.86	36.19	34.35	39.25	36.94	35.27	36.57	35.38	34.1	33.35	35.52
6.51667	35.75	35.97	36.21	34.42	39.18	37.02	35.36	36.64	35.37	34.03	33.39	35.51
6.53333	35.66	36.12	36.24	34.43	39.16	37.08	35.54	36.77	35.33	33.91	33.39	35.49
6.55	35.61	36.38	36.2	34.41	39.2	37.05	35.56	36.82	35.22	33.87	33.38	35.5
6.56667	35.6	36.52	36.16	34.4	39.21	36.98	35.64	36.81	35.22	33.87	33.38	35.51
6.58333	35.62	36.51	36.17	34.42	39.2	36.99	35.91	36.75	35.11	33.87	33.4	35.52
6.6	35.63	36.5	36.18	34.45	39.2	36.96	36.21	36.46	35.13	33.87	33.4	35.52
6.61667	35.64	36.53	36.26	34.44	39.2	36.86	36.3	36.09	35.12	33.85	33.41	35.52
6.63333	35.64	36.73	36.35	34.4	39.24	36.72	36.16	35.94	35.11	33.84	33.42	35.48
6.65	35.74	36.76	36.48	34.58	39.27	36.63	36.13	35.93	35.39	33.88	33.43	35.47
6.66667	35.81	36.72	36.77	34.61	39.27	36.57	36.42	35.96	35.58	33.95	33.47	35.49
6.68333	35.83	36.77	36.7	34.41	39.23	36.48	36.54	35.96	35.64	33.99	33.48	35.5
6.7	35.89	36.92	36.55	34.45	39.15	36.35	36.53	35.94	35.7	33.99	33.48	35.51
6.71667	36.03	36.99	36.57	34.44	39.15	36.28	36.49	35.96	35.82	33.93	33.48	35.51
6.73333	36.13	37.12	36.63	34.24	39.2	36.26	36.36	35.96	35.79	33.93	33.5	35.51
6.75	36.17	37.19	36.68	34.16	39.2	36.22	36.39	35.94	35.6	33.99	33.51	35.5
6.76667	36.2	37.26	36.7	34.38	39.18	36.23	36.56	35.88	35.5	34.01	33.53	35.48
6.78333	36.35	37.35	36.66	34.61	39.18	36.23	36.53	35.81	35.39	34	33.55	35.48
6.8	36.38	37.37	36.66	34.75	39.19	36.22	36.37	35.73	35.39	33.98	33.57	35.52
6.81667	36.4	37.39	36.7	34.79	39.19	36.2	36.51	35.58	35.5	33.97	33.75	35.56
6.83333	36.44	37.38	36.76	34.88	39.17	36.17	36.57	35.43	35.51	34	33.79	35.52
6.85	36.47	37.37	36.79	35.06	39.17	36.19	36.66	35.33	35.39	34.04	33.8	35.46
6.86667	36.54	37.37	36.75	35	39.17	36.21	36.77	35.25	35.25	34	33.8	35.42
6.88333	36.67	37.37	36.74	34.87	39.17	36.21	36.84	35.21	35.24	33.93	33.82	35.41
6.9	36.79	37.38	36.85	34.88	39.19	36.22	36.87	35.18	35.42	33.93	33.84	35.41
6.91667	36.83	37.38	36.95	35.09	39.27	36.24	36.85	35.17	35.56	33.97	33.85	35.41
6.93333	36.83	37.36	36.96	35.34	39.3	36.22	36.64	35.14	35.64	33.97	33.85	35.41
6.95	36.81	37.34	37.01	35.33	39.29	36.22	36.05	35.06	35.68	33.96	33.85	35.41
6.96667	36.86	37.31	37.08	35.11	39.3	36.22	35.9	34.95	35.69	33.93	33.89	35.49
6.98333	36.87	37.3	37.08	35.03	39.33	36.19	35.97	34.84	35.76	33.94	34.01	35.68
7	36.87	37.32	37.07	34.98	39.35	36.12	36.07	34.84	35.8	34.05	34.2	35.71
7.01667	36.86	37.3	37.08	34.92	39.46	35.89	36.16	34.89	35.83	34.08	34.12	35.72
7.03333	36.8	37.16	37.08	34.9	39.7	35.82	36.2	34.93	35.84	34.08	33.79	35.73
7.05	36.69	37.17	36.91	34.89	39.78	35.89	36.2	34.93	35.84	34.08	33.69	35.76
7.06667	36.6	37.33	36.69	34.85	39.8	36.21	36.17	34.9	35.87	34.06	33.82	35.84
7.08333	36.72	37.4	36.73	34.78	39.73	36.25	36.14	34.87	35.9	34.04	33.97	35.83
7.1	36.82	37.46	36.94	34.7	39.65	36.26	36.14	34.85	35.91	34	33.98	35.79
7.11667	36.82	37.47	37.02	34.61	39.61	36.3	36.18	34.82	35.85	33.95	33.88	35.76
7.13333	36.79	37.44	37.1	34.5	39.6	36.31	36.18	34.8	35.81	33.91	33.89	35.69
7.15	36.75	37.32	37.08	34.41	39.57	36.34	36.16	34.79	35.63	33.87	34.1	35.59
7.16667	36.7	37.37	37.18	34.32	39.53	36.36	36.14	34.82	35.58	33.82	34.64	35.53
7.18333	36.65	37.44	37.28	34.16	39.52	36.36	36.16	34.82	35.56	33.77	34.85	35.49
7.2	36.61	37.48	37.12	34.08	39.54	36.42	36.17	34.8	35.5	33.75	34.96	35.53
7.21667	36.59	37.54	36.95	34.09	39.53	36.49	36.16	34.79	35.49	33.73	34.95	35.76
7.23333	36.57	37.57	36.86	34.14	39.42	36.47	36.14	34.81	35.53	33.7	34.97	35.87
7.25	36.55	37.58	36.77	34.16	39.41	36.32	36.08	34.82	35.71	33.68	35	35.9
7.26667	36.52	37.58	36.78	34.24	39.36	36.17	36	34.84	35.78	33.65	35.04	35.89
7.28333	36.51	37.57	36.82	34.41	39.14	36.09	35.92	34.89	35.8	33.62	35.11	35.82
7.3	36.49	37.51	36.82	34.44	39.08	36.17	35.87	34.99	35.86	33.56	35.18	35.7
7.31667	36.48	37.43	36.77	34.42	39.08	36.35	35.83	35.09	35.99	33.49	35.23	35.72
7.33333	36.48	37.38	36.69	34.34	39.09	36.83	35.78	35.21	36.01	33.47	35.25	35.97
7.35	36.49	37.32	36.64	34.11	39.17	36.96	35.74	35.32	35.83	33.66	35.31	35.99
7.36667	36.5	37.27	36.67	33.93	39.18	36.96	35.7	35.41	35.66	33.87	35.41	35.93
7.38333	36.48	37.21	36.67	33.89	39.18	36.91	35.67	35.42	35.67	34.03	35.5	35.87
7.4	36.37	37.15	36.66	33.85	39.13	36.87	35.62	35.46	35.65	34.28	35.56	35.81
7.41667	36.3	37.08	36.61	33.81	39.08	36.79	35.58	35.51	35.61	34.52	35.63	35.77
7.43333	36.26	37.02	36.52	33.78	39.1	36.79	35.54	35.53	35.63	34.62	35.74	35.71
7.45	36.22	36.98	36.52	33.79	39.16	36.84	35.49	35.53	35.65	34.95	35.8	35.64
7.46667	36.2	36.91	36.54	33.89	39.2	36.87	35.37	35.51	35.66	35.22	35.8	35.57
7.48333	36.2	36.89	36.62	34.06	39.19	37.09	35.31	35.52	35.68	35.28	35.68	35.5
7.5	36.19	36.89	36.69	34.14	38.97	37.03	35.34	35.65	35.63	35.22	35.56	35.45
7.51667	36.11	36.89	36.75	34.15	38.89	36.96	35.43	35.78	35.56	35.1	35.51	35.41
7.53333	36.01	36.86	36.75	34.21	38.96	37	35.49	35.97	35.62	34.98	35.55	35.36
7.55	35.99	36.81	36.66	34.22	38.99	37	35.69	35.97	35.64	34.92	35.61	35.31
7.56667	36.01	36.73	36.59	34.21	38.97	36.99	35.72	35.8	35.71	34.85	35.63	35.3
7.58333	36.05	36.68	36.6	34.29	38.9	36.96	35.77	35.83	35.72	34.96	35.61	35.29
7.6	36.06	36.63	36.56	34.42	38.92	36.92	35.78	35.94	35.7	35.33	35.66	35.28
7.61667	36.05	36.58	36.56	34.49	38.91	36.87	35.77	36.1	35.63	35.42	35.79	35.33
7.63333	36.05	36.56	36.56	34.64	38.86	36.84	35.72	36.22	35.59	35.44	35.88	35.35
7.65	36.06	36.55	36.52	35	38.85	36.82	35.69	36.28	35.59	35.43	35.89	35.35
7.66667	36.06	36.5	36.48	35.15	39.05	36.8	35.67	36.37	35.65	35.44	35.85	35.39
7.68333	36.06	36.42	36.49	35.18	39.34	36.74	35.67	36.48	35.68	35.43	35.88	35.52
7.7	36.07	36.35	36.58	34.9	39.44	36.71	35.7	36.61	35.7	35.3	35.89	35.6
7.71667	36.12	36.39	36.65	34.71	39.5	36.72	35.7	36.73	35.71	35.24	35.85	35.62
7.73333	36.24	36.5	36.64	34.96	39.32	36.74	35.69	36.77	35.72	35.25	35.87	35.68
7.75	36.49	36.59	36.57	35.01	38.82	36.75	35.67	36.77	35.8	35.25	35.88	36.02
7.76667	36.55	36.56	36.55	34.92	38.72	36.74	35.67	36.75	35.99	35.05	35.91	36.11
7.78333	36.55	36.58	36.57	34.91	38.59	36.71	35.71	36.57	36.08	34.86	35.87	36.1
7.8	36.67	36.7	36.59	34.9	38.45	36.68	35.73	36.29	36.04	34.83	35.74	36.12
7.81667	36.8	36.81	36.56	34.87	38.45	36.75	35.73	36.22	35.81	34.77	35.61	36.22
7.83333	36.89	36.82	36.47	34.88	38.52	36.75	35.7	36.31	35.83	34.76	35.39	36.31
7.85	36.91	36.81	36.52	35.06	38.57	36.7	35.68	36.41	36.05	34.86	35.33	36.41
7.86667	36.94	36.85	36.57	35.16	38.63	36.61	35.67	36.53	36.46	34.86	35.34	36.53
7.88333	36.98	36.88	36.57	35.16	38.67	36.61	35.7	36.62	36.56	34.88	35.35	36.6
7.9	36.98	36.93	36.61	35.24	38.7	36.62	35.75	36.65	36.49	34.91	35.33	36.63
7.91667	37.05	36.95	36.65	35.31	38.71	36.62	35.76	36.63	36.29	34.95	35.35	36.63
7.93333	37.19	36.96	36.69	35.29	38.72	36.72	35.69	36.61	36.12	35.12	35.4	36.68
7.95	37.28	36.96	36.71	35.23	38.72	36.76	35.55	36.6	36.02	35.29	35.47	36.74
7.96667	37.34	36.98	36.68	35.07	38.71	36.82	35.5	36.54	36.09	35.35	35.59	36.79
7.98333	37.4	36.98	36.63	34.92	38.68	36.85	35.47	36.4	36.09	35.37	35.67	36.87
8	37.42	36.93	36.61	34.76	38.62	36.91	35.52	36.27	36.08	35.37	35.7	36.89
