# Supplementary material for: TRPV1 drugs alter core body temperature via central projections of primary afferent sensory neurons
Source: eLife. 2022 Aug 15;11:e80139. doi: 10.7554/eLife.80139 (PMC9377796; doi:10.7554/eLife.80139)
Supplement: Figure 2—source data 3. [file elife-80139-fig2-data3.xlsx]

## Sheet: Tg(AvilCreERT2)
Genotype	Trpv1fl/fl	Trpv1fl/fl	Trpv1fl/fl	Tg(Avil-CreERT2); Trpv1fl/fl	Tg(Avil-CreERT2); Trpv1fl/fl	Tg(Avil-CreERT2); Trpv1fl/fl	Tg(Avil-CreERT2); Trpv1fl/fl
% responder	41.1765	32.5	52.8302	20	7.31707	9.52381	7.40741
