# Supplementary material for: TRPV1 drugs alter core body temperature via central projections of primary afferent sensory neurons
Source: eLife. 2022 Aug 15;11:e80139. doi: 10.7554/eLife.80139 (PMC9377796; doi:10.7554/eLife.80139)
Supplement: Figure 3—source data 1. [file elife-80139-fig3-data1.xlsx]

## Sheet: Hotplate reaction time
Genotype	Veh-IT	Cap-IT
Reaction time	3	18
	8	18
	5	20
	6	23.5
	8	25
		19.5
		18.5

## Sheet: Intraplantar AITC duration
Genotype	Veh-IT	Cap-IT
Nocifensive duration	72	4
	81	25
	79	10
	74	6
	57	0
		3
		0

## Sheet: Intraplantar AITC thickness
Genotype	Veh-IT	Cap-IT
% Paw thickness increase	72.2689	86.3014
	95.8549	86.7925
	76.5258	75
	95.6938	108.556
	63.964	44.3787
		69.8925
		59.009
