# Supplementary material for: TRPV1 drugs alter core body temperature via central projections of primary afferent sensory neurons
Source: eLife. 2022 Aug 15;11:e80139. doi: 10.7554/eLife.80139 (PMC9377796; doi:10.7554/eLife.80139)
Supplement: Figure 3—source data 2. [file elife-80139-fig3-data2.xlsx]

## Sheet: Cap-IT Cap
Time	Veh-IT	Veh-IT	Veh-IT	Veh-IT	Veh-IT	Cap-IT	Cap-IT	Cap-IT	Cap-IT	Cap-IT	Cap-IT	Cap-IT
	4214	4244	4248	4249	4246	4223	4229	42XX	4258	4241	4261	4273
-1	0.284426	0.387377	-0.29508	1.50459	-0.3641	-0.77246	-0.25508	0.244426	0.835574	0.12918	0.636557	0.241475
-0.98333	0.344426	0.277377	-0.26508	1.40459	-0.3641	-0.70246	-0.18508	0.204426	0.905574	0.03918	0.596557	0.291475
-0.96667	0.364426	0.407377	-0.28508	1.36459	-0.3541	-0.67246	-0.14508	0.204426	0.955574	-0.01082	0.636557	0.351475
-0.95	0.364426	0.617377	-0.43508	1.24459	-0.3341	-0.71246	-0.15508	0.284426	0.965574	-0.06082	0.626557	0.401475
-0.93333	0.164426	0.677377	-0.47508	1.19459	-0.2841	-0.75246	-0.18508	0.264426	0.935574	-0.02082	0.416557	0.461475
-0.91667	-0.09557	0.637377	-0.46508	1.19459	-0.2441	-0.77246	-0.25508	0.114426	0.825574	0.08918	0.246557	0.541475
-0.9	-0.05557	0.587377	-0.49508	1.13459	-0.1641	-0.76246	-0.29508	0.104426	0.695574	0.11918	0.126557	0.581475
-0.88333	0.104426	0.577377	-0.45508	1.15459	-0.1541	-0.77246	-0.34508	0.144426	0.485574	0.12918	0.036557	0.591475
-0.86667	0.264426	0.577377	-0.34508	1.24459	-0.1541	-0.79246	-0.39508	0.204426	0.415574	0.13918	-0.03344	0.571475
-0.85	-0.08557	0.497377	-0.25508	1.20459	-0.1541	-0.84246	-0.40508	0.354426	0.415574	0.13918	-0.03344	0.511475
-0.83333	-0.36557	0.417377	-0.21508	1.07459	-0.1441	-0.90246	-0.43508	0.414426	0.495574	0.15918	-0.01344	0.471475
-0.81667	-0.60557	0.367377	-0.18508	0.96459	-0.1741	-0.86246	-0.58508	0.344426	0.635574	0.15918	-0.00344	0.381475
-0.8	-0.68557	0.337377	-0.16508	0.77459	-0.2541	-0.82246	-0.61508	0.254426	0.805574	0.20918	-0.01344	0.291475
-0.78333	-0.69557	0.287377	-0.19508	0.47459	-0.1641	-0.81246	-0.55508	0.234426	0.855574	0.30918	0.006557	0.201475
-0.76667	-0.60557	0.217377	-0.21508	0.20459	0.005902	-0.77246	-0.53508	0.284426	0.895574	0.32918	-0.02344	0.141475
-0.75	-0.31557	0.177377	-0.23508	-0.00541	0.365902	-0.76246	-0.48508	0.344426	0.975574	0.31918	-0.05344	0.121475
-0.73333	-0.44557	0.147377	-0.28508	-0.06541	0.425902	-0.75246	-0.30508	0.404426	1.03557	0.29918	-0.02344	0.181475
-0.71667	-0.59557	0.117377	-0.30508	-0.16541	0.425902	-0.70246	-0.17508	0.404426	1.06557	0.32918	0.036557	0.261475
-0.7	-0.60557	0.027377	-0.27508	-0.34541	0.415902	-0.65246	-0.13508	0.344426	1.07557	0.29918	0.086557	0.361475
-0.68333	-0.65557	-0.03262	-0.17508	-0.45541	0.355902	-0.64246	-0.06508	0.304426	1.01557	0.43918	0.086557	0.441475
-0.66667	-0.74557	-0.00262	-0.13508	-0.44541	0.295902	-0.65246	0.024918	0.384426	0.865574	0.68918	0.036557	0.501475
-0.65	-0.74557	-0.01262	-0.13508	-0.52541	0.295902	-0.68246	0.124918	0.434426	0.655574	0.84918	-0.01344	0.561475
-0.63333	-0.68557	-0.04262	-0.08508	-0.67541	0.325902	-0.71246	0.314918	0.414426	0.475574	1.14918	-0.04344	0.601475
-0.61667	-0.61557	-0.05262	-0.07508	-0.72541	0.305902	-0.77246	0.494918	0.364426	0.395574	1.47918	-0.04344	0.511475
-0.6	-0.51557	-0.10262	-0.09508	-0.73541	0.195902	-0.74246	0.704918	0.324426	0.335574	1.43918	0.006557	0.301475
-0.58333	-0.38557	-0.14262	-0.15508	-0.73541	0.165902	-0.73246	0.744918	0.364426	0.265574	1.46918	0.056557	0.251475
-0.56667	-0.31557	-0.15262	-0.22508	-0.67541	0.195902	-0.63246	0.734918	0.424426	0.235574	1.90918	0.026557	0.301475
-0.55	-0.25557	-0.15262	-0.15508	-0.62541	0.345902	-0.55246	0.724918	0.394426	0.195574	1.86918	-0.08344	0.361475
-0.53333	-0.07557	-0.15262	-0.06508	-0.57541	0.385902	-0.49246	0.614918	0.294426	0.155574	1.82918	-0.17344	0.371475
-0.51667	0.094426	-0.19262	-0.01508	-0.57541	0.385902	-0.44246	0.494918	0.164426	0.085574	1.84918	-0.25344	0.301475
-0.5	0.344426	-0.18262	0.064918	-0.55541	0.375902	-0.40246	0.374918	0.044426	0.045574	1.60918	-0.44344	0.241475
-0.48333	0.524426	-0.17262	0.144918	-0.55541	0.365902	-0.43246	0.294918	-0.03557	0.045574	1.34918	-0.49344	0.141475
-0.46667	0.604426	-0.15262	0.164918	-0.56541	0.425902	-0.40246	0.154918	-0.11557	0.085574	1.20918	-0.42344	0.061475
-0.45	0.594426	-0.10262	0.124918	-0.57541	0.415902	-0.39246	0.124918	-0.18557	0.085574	0.84918	-0.30344	-0.02852
-0.43333	0.334426	-0.07262	0.034918	-0.61541	0.295902	-0.41246	0.024918	-0.31557	-0.24443	0.60918	-0.26344	-0.06852
-0.41667	0.084426	-0.02262	-0.03508	-0.65541	0.165902	-0.42246	0.074918	-0.40557	-0.42443	0.42918	-0.23344	-0.10852
-0.4	0.054426	0.027377	-0.17508	-0.74541	-0.0441	-0.40246	0.154918	-0.43557	-0.49443	0.21918	-0.19344	-0.13852
-0.38333	0.104426	0.067377	-0.27508	-0.74541	-0.1141	-0.35246	0.244918	-0.41557	-0.52443	-0.28082	-0.18344	-0.18852
-0.36667	0.394426	0.117377	-0.34508	-0.63541	-0.1741	-0.32246	0.334918	-0.40557	-0.52443	-0.70082	-0.17344	-0.23852
-0.35	0.444426	0.137377	-0.44508	-0.57541	-0.2341	-0.27246	0.444918	-0.38557	-0.55443	-0.94082	-0.13344	-0.16852
-0.33333	0.434426	0.117377	-0.57508	-0.58541	-0.3541	-0.24246	0.524918	-0.36557	-0.59443	-1.13082	-0.07344	-0.09852
-0.31667	0.414426	0.107377	-0.65508	-0.63541	-0.3741	-0.14246	0.564918	-0.29557	-0.64443	-1.20082	-0.03344	-0.01852
-0.3	0.344426	0.057377	-0.47508	-0.71541	-0.3341	-0.02246	0.574918	-0.10557	-0.68443	-1.27082	0.006557	0.061475
-0.28333	0.324426	-0.06262	-0.31508	-0.84541	-0.3441	0.277541	0.544918	-0.03557	-0.70443	-1.29082	0.016557	0.081475
-0.26667	0.284426	-0.11262	-0.21508	-0.86541	-0.3241	0.727541	0.494918	0.014426	-0.73443	-1.23082	-0.03344	0.091475
-0.25	0.204426	-0.08262	-0.22508	-0.70541	-0.2341	0.947541	0.494918	0.064426	-0.79443	-1.09082	-0.04344	0.081475
-0.23333	0.124426	-0.02262	-0.33508	-0.56541	-0.2041	1.26754	0.314918	0.054426	-0.83443	-0.98082	-0.00344	0.061475
-0.21667	0.134426	-0.10262	-0.14508	-0.55541	-0.2041	1.59754	0.184918	0.034426	-0.88443	-0.92082	0.066557	0.061475
-0.2	0.164426	-0.19262	0.294918	-0.58541	-0.1641	1.91754	0.124918	0.034426	-0.97443	-0.87082	0.136557	0.071475
-0.18333	0.174426	-0.17262	0.554918	-0.51541	-0.1241	2.15754	0.074918	0.024426	-1.00443	-0.88082	0.126557	0.081475
-0.16667	0.174426	-0.23262	0.784918	-0.36541	-0.0741	2.16754	-0.11508	0.024426	-1.06443	-0.88082	0.106557	-0.02852
-0.15	0.154426	-0.43262	1.01492	-0.19541	-0.0941	2.08754	-0.23508	0.024426	-1.11443	-0.92082	0.126557	-0.24852
-0.13333	0.154426	-0.66262	1.04492	-0.08541	-0.1241	2.01754	-0.19508	0.004426	-1.14443	-1.13082	0.126557	-0.39852
-0.11667	0.144426	-0.69262	0.934918	0.09459	-0.1241	1.84754	-0.08508	-0.29557	-1.14443	-1.15082	0.046557	-0.68852
-0.1	0.134426	-0.62262	0.894918	0.25459	-0.1341	1.55754	0.044918	-0.51557	-1.11443	-1.11082	-0.02344	-0.95852
-0.08333	0.184426	-0.55262	1.03492	0.40459	-0.0741	1.37754	-0.12508	-0.59557	-1.07443	-1.09082	-0.08344	-1.14852
-0.06667	0.204426	-0.48262	1.12492	0.47459	-0.0141	1.30754	-0.24508	-0.66557	-1.00443	-1.06082	-0.11344	-1.27852
-0.05	0.194426	-0.45262	1.04492	0.52459	0.045902	1.26754	-0.60508	-0.86557	-0.81443	-1.02082	-0.11344	-1.37852
-0.03333	0.224426	-0.47262	0.764918	0.71459	0.075902	1.31754	-0.88508	-0.95557	-0.51443	-0.99082	-0.09344	-1.56852
-0.01667	0.254426	-0.44262	0.694918	0.95459	0.075902	1.12754	-1.03508	-0.97557	-0.36443	-1.07082	-0.08344	-1.83852
0	0.254426	-0.43262	0.654918	1.21459	0.035902	0.907541	-1.11508	-0.97557	-0.24443	-1.13082	-0.07344	-1.90852
0.016667	0.254426	-0.39262	0.334918	1.30459	-0.1141	0.937541	-1.02508	-1.11557	-0.18443	-1.18082	-0.09344	-2.13852
0.033333	0.214426	-0.40262	0.114918	1.33459	-0.3641	1.06754	-0.91508	-1.40557	-0.09443	-1.19082	-0.27344	-2.11852
0.05	0.144426	-0.39262	-0.05508	1.34459	-0.5441	1.11754	-0.81508	-1.61557	0.025574	-1.15082	-0.40344	-2.02852
0.066667	0.094426	-0.00262	-0.20508	1.34459	-0.5941	-0.00246	-0.79508	-1.81557	0.495574	-1.08082	-0.50344	-2.11852
0.083333	-0.06557	-0.20262	-0.51508	1.38459	-0.6241	-0.36246	-0.67508	-1.48557	0.485574	-0.89082	-0.56344	-2.06852
0.1	-0.72	0.18	-0.06	3.53	-0.55	-0.39		-0.93	0.46	-1.36	-0.83	-2.62
0.116667	-0.65	-0.03	-0.38	1.2	-0.51	-0.59	-0.13	-0.42	0.15	0.58	-0.76	-2.59
0.133333	-0.39	-0.39	-1.08	1.19	-0.12	-0.63	-0.06	-0.53	0.71	-0.37	-0.6	-2.34
0.15	-0.23	-0.88	-1.69	0.72	0.58	-0.68	0.12	-0.52	0.89	-0.45	-0.67	-2.08
0.166667	0.94	-1.4	-1.8	-0.12	0.82	-0.72	0.47	-0.63	1.04	-0.5	0.2	-2.03
0.183333		-1.65	-1.99	-0.9	1.01	-0.49	0.68	-0.93	1.14	-0.38	0.16	-1.32
0.2	1.27	-2	-2.19	-1.57	1.1	-0.6	0.74	-1.26	1.35	-0.45	0.14	-1.36
0.216667	1.06	-2.27	-2.34	-2.04	1.05	-0.68	0.75	-1.42	1.54	-0.41	0.07	-1.36
0.233333	0.87	-2.73	-2.47	-2.3	1.04	-0.93	0.7	-1.78	1.73	-0.27	-0.32	-1.35
0.25	0.97	-2.83	-2.6	-2.48	0.94	-1.01	0.66	-1.96	1.75	-0.24	-0.64	-1.54
0.266667	0.41	-3.3	-2.81	-2.78	0.81	-0.95	0.52	-2.02	1.89	-0.1	-0.64	-1.65
0.283333	-0.08	-3.88	-3.39	-3.05	0.66	-1.08	0.51	-2.16	1.82	0.04	-0.63	-1.75
0.3	-0.47	-4.38	-3.53	-3.45	0.48	-1.22	0.4	-2.39	1.68	0.12	-0.87	-1.85
0.316667	-0.68	-4.72	-3.54	-4.11	0.4	-1.37	0.17	-2.66	1.53	0.15	-1.37	-1.76
0.333333	-0.93	-5.01	-3.8	-4.72	0.24	-1.87	0.05	-2.64	1.65	0	-1.73	-1.73
0.35	-1.43	-5.32	-4.14	-5.09	-0.01	-2.12	0.07	-2.79	1.78	0	-1.79	-1.69
0.366667	-1.68	-5.68	-4.23	-5.61	-0.15	-2.16	-0.06	-3.21	0.83	0.01	-1.83	-1.65
0.383333	-1.81	-5.96	-4.42	-6.09	-0.25	-2.14	-0.32	-3.62	0.52	0.06	-2	-1.61
0.4	-2.04	-6.16	-4.85	-6.41	-0.37	-2.28	-0.39	-3.64	0.2	-0.02	-2.24	-1.42
0.416667	-2.17	-6.38	-5	-6.61	-0.54	-2.63	-0.36	-3.68	-0.37	-0.22	-2.29	-1.28
0.433333	-2.26	-6.88	-4.84	-6.79	-0.69	-2.89	-0.32	-3.53	-0.76	-0.28	-2.22	-1.29
0.45	-2.44	-7.45	-4.77	-7.01	-0.92	-3.14	-0.25	-3.46	-1.07	-0.02	-2.27	-1.29
0.466667	-2.83	-7.72	-4.88	-7.14	-0.97	-3.12	-0.34	-3.81	-1.28	0.14	-2.26	-1.55
0.483333	-3.23	-7.94	-5.12	-7.12	-0.99	-2.71	-0.44	-3.92	-1.38	0.27	-2.28	-1.49
0.5	-3.57	-8.13	-5.21	-7.14	-1.2	-2.62	-0.61	-3.77	-1.41	0.29	-2.25	-1.42
0.516667	-3.81	-8.3	-5.29	-7.19	-1.71	-2.63	-0.86	-3.69	-1.32	0.31	-2.13	-1.09
0.533333	-3.96	-8.42	-5.32	-7.23	-2.22	-2.74	-0.98	-3.58	-1.03	0.51	-1.96	-1.08
0.55	-3.97	-8.48	-5.27	-7.25	-2.68	-2.86	-1.14	-3.51	-0.89	0.66	-1.93	-1.18
0.566667	-3.81	-8.62	-5.16	-7.03	-3.01	-3	-1.14	-3.52	-1.22	0.63	-1.88	-1.18
0.583333	-3.9	-8.57	-4.68	-6.94	-3.29	-3.11	-0.95	-3.46	-1.26	0.59	-1.8	-0.97
0.6	-4.3	-8.32	-4.64	-7	-3.57	-3.18	-0.89	-3.5	-1.16	0.64	-1.84	-0.76
0.616667	-4.59	-8.39	-4.58	-6.91	-3.88	-3.23	-0.79	-3.58	-0.54	0.69	-1.95	-0.64
0.633333	-4.81	-8.48	-4.44	-6.93	-4.14	-3.28	-0.81	-3.7	-0.28	0.35	-1.69	-0.47
0.65	-4.98	-8.67	-4.21	-6.96	-4.3	-3.33	-0.94	-3.69	-0.49	0.08	-1.32	-0.35
0.666667	-5.01	-8.81	-4.57	-7.07	-4.56	-3.36	-1.08	-3.36	-0.95	0.01	-1.14	-0.3
0.683333	-4.89	-8.83	-4.91	-7.13	-4.69	-3.37	-1.15	-3.13	-0.96	0.12	-1.06	-0.44
0.7	-4.88	-8.81	-4.94	-6.96	-4.68	-3.35	-1.15	-3.02	-0.93	0.16	-1.03	-0.53
0.716667	-4.74	-8.85	-4.91	-6.88	-4.71	-3.35	-1.19	-2.77	-0.91	0.17	-1.02	-0.62
0.733333	-4.73	-8.97	-4.85	-6.94	-4.64	-3.34	-1.25	-2.78	-0.84	0.24	-0.71	-0.48
0.75	-4.72	-8.89	-4.91	-6.94	-4.5	-3.33	-1.28	-2.82	-0.8	0.4	-0.39	-0.31
0.766667	-4.67	-8.76	-5.13	-6.81	-4.41	-3.3	-1.31	-2.8	-0.67	0.49	-0.28	-0.28
0.783333	-4.66	-8.76	-5.07	-6.59	-4.29	-3.27	-1.37	-2.76	-0.65	0.7	-0.35	-0.32
0.8	-4.97	-8.57	-4.74	-6.42	-4.18	-3.24	-1.41	-2.66	-0.84	0.77	-0.44	-0.26
0.816667	-5.15	-8.38	-4.79	-6.31	-4.09	-3.23	-1.39	-2.67	-0.9	0.82	-0.63	-0.28
0.833333	-5.18	-8.35	-4.75	-6.48	-4.11	-3.24	-1.4	-2.66	-0.89	0.89	-0.63	-0.26
0.85	-5.01	-8.34	-4.57	-6.59	-4.27	-3.26	-1.4	-2.45	-0.86	1.03	-0.64	-0.24
0.866667	-4.93	-8.37	-4.22	-6.63	-4.4	-3.47	-1.38	-2.39	-0.66	1.1	-0.68	-0.18
0.883333	-4.97	-8.34	-4.15	-6.57	-4.37	-3.76	-1.27	-2.31	-0.67	1.19	-0.56	-0.06
0.9	-4.94	-8.25	-4.17	-6.31	-4.2	-3.7	-1.24	-2.21	-0.7	1.05	-0.28	-0.02
0.916667	-4.95	-8.18	-3.9	-6.02	-3.88	-3.49	-1.22	-2.21	-0.62	0.88	-0.09	0
0.933333	-4.87	-8.09	-3.19	-5.85	-3.78	-3.45	-1.1	-2.21	-0.42	0.76	-0.01	0.1
0.95	-4.84	-8.12	-3.16	-5.81	-3.67	-3.48	-0.94	-2.15	-0.06	0.68	-0.1	0.12
0.966667	-4.85	-8.04	-3.17	-5.9	-3.47	-3.53	-0.83	-2.15	0.17	0.62	-0.29	0.23
0.983333	-4.76	-7.91	-3.05	-5.91	-3.17	-3.78	-0.68	-2.21	0.16	0.58	-0.42	0.29
1	-4.4	-7.87	-2.56	-5.77	-3.11	-3.93	-0.7	-2.24	0.21	0.53	-0.36	0.42
1.01667	-4.17	-7.86	-2.15	-5.62	-3.1	-4.06	-0.76	-2.15	0.28	0.51	-0.14	0.59
1.03333	-4.11	-7.72	-1.92	-5.54	-3.15	-4.1	-0.71	-2.06	0.37	0.38	-0.15	0.7
1.05	-4.18	-7.57	-1.89	-5.49	-3.09	-4.13	-0.53	-2.1	0.3	0.28	-0.15	0.86
1.06667	-4.31	-7.34	-2.05	-5.42	-2.99	-4.11	-0.55	-2.16	0.31	0.3	-0.07	0.87
1.08333	-4.29	-7.24	-2.02	-5.31	-3	-4.04	-0.67	-2.14	0.33	0.51	-0.22	0.67
1.1	-4.25	-7.24	-1.97	-5.33	-2.96	-4	-0.69	-2.12	0.34	0.72	-0.34	0.69
1.11667	-4.19	-7.41	-1.95	-5.24	-2.86	-3.95	-0.64	-2.12	0.31	0.92	-0.43	0.74
1.13333	-4.14	-7.47	-1.93	-4.85	-2.63	-3.89	-0.63	-2.05	0.44	1.05	-0.45	0.77
1.15	-4.05	-7.23	-2.02	-4.62	-2.51	-3.89	-0.59	-2.09	0.46	1.16	-0.38	0.91
1.16667	-3.94	-7.02	-2.52	-4.48	-2.71	-3.91	-0.54	-2.24	0.38	1.1	-0.32	1.18
1.18333	-3.87	-6.83	-2.56	-4.45	-2.9	-3.86	-0.42	-2.07	0.3	0.99	-0.28	1.2
1.2	-3.84	-6.84	-2.56	-4.6	-2.87	-3.78	-0.36	-1.87	0.28	0.99	-0.21	1.22
1.21667	-3.96	-6.92	-2.57	-4.54	-2.89	-3.69	-0.29	-1.76	0.33	0.94	-0.17	1.28
1.23333	-4.18	-6.98	-2.54	-4.47	-2.78	-3.59	-0.2	-1.7	0.39	0.99	-0.19	1.26
1.25	-4.34	-6.94	-2.46	-4.28	-2.69	-3.51	-0.13	-1.87	0.49	0.78	-0.2	1.16
1.26667	-4.4	-6.86	-2.39	-4.26	-2.54	-3.41	-0.07	-1.7	0.62	0.52	-0.2	1.24
1.28333	-4.4	-6.8	-2.38	-4.3	-2.55	-3.29	-0.01	-1.57	0.82	0.45	-0.22	1.26
1.3	-4.35	-6.68	-2.42	-3.88	-2.62	-3.12	0.02	-1.52	1.12	0.48	-0.27	1.18
1.31667	-4.28	-6.51	-2.46	-3.54	-2.37	-2.71	0.03	-1.45	1.39	0.5	-0.21	1.05
1.33333	-4.2	-6.34	-2.35	-3.39	-2.28	-2.4	0.04	-1.3	1.48	0.54	-0.01	0.96
1.35	-4.1	-6.19	-2.28	-3.43	-2.43	-2.21	0.08	-1.14	1.53	0.57	0.25	0.82
1.36667	-3.97	-6.09	-2.28	-3.41	-2.37	-2.08	0.1	-1.03	1.6	0.62	0.51	0.74
1.38333	-3.83	-5.97	-2.34	-3.46	-2.2	-1.99	0.07	-1.01	1.49	0.67	0.6	0.69
1.4	-3.75	-5.81	-2.41	-3.47	-2.14	-1.95	0	-1.06	1.3	0.69	0.6	0.74
1.41667	-3.58	-5.69	-2.22	-3.06	-2.17	-2.05	-0.02	-1.13	1.3	0.78	0.64	0.85
1.43333	-3.49	-5.58	-2.05	-2.94	-2.11	-2.4	-0.03	-1.18	1.24	0.86	0.68	1.02
1.45	-3.3	-5.45	-1.92	-2.96	-1.9	-3.08	-0.06	-1.22	1.09	0.88	0.61	1.01
1.46667	-2.97	-5.33	-1.81	-2.89	-1.78	-3.28	-0.04	-1.15	1.1	0.88	0.53	1.02
1.48333	-2.8	-5.21	-1.69	-2.65	-1.68	-3.41	0	-1.23	1.18	0.9	0.42	1.07
1.5	-2.72	-5.05	-1.57	-2.74	-1.62	-3.5	0.02	-1.59	1.26	0.81	0.39	1.06
1.51667	-2.75	-4.92	-1.47	-2.89	-1.5	-3.6	0.08	-1.71	1.33	0.69	0.37	1.04
1.53333	-2.82	-4.83	-1.29	-2.88	-1.43	-3.75	0.13	-1.69	1.38	0.59	0.25	0.97
1.55	-2.85	-4.69	-1.28	-2.7	-1.38	-3.9	0.16	-1.56	1.4	0.51	0.08	0.68
1.56667	-2.93	-4.55	-1.23	-2.55	-1.44	-4.03	0.15	-1.54	1.33	0.43	0.17	0.71
1.58333	-2.99	-4.4	-1.23	-2.4	-1.56	-3.96	0.11	-1.63	1.22	0.23	0.27	0.68
1.6	-3.04	-4.22	-1.46	-2.32	-1.48	-3.88	0.13	-1.66	1.17	0.04	0.32	0.58
1.61667	-3.03	-3.78	-1.65	-2.25	-1.21	-3.85	0.16	-1.71	1.05	-0.06	0.32	0.63
1.63333	-3	-3.53	-1.52	-2.18	-0.99	-3.79	0.16	-1.82	1.03	-0.1	0.22	0.77
1.65	-2.95	-3.46	-1.45	-2.11	-0.85	-3.74	0.15	-1.86	1.12	-0.1	0.1	0.84
1.66667	-2.86	-3.55	-1.54	-1.81	-0.81	-3.68	0.19	-1.86	1.21	-0.1	-0.05	0.87
1.68333	-2.75	-3.67	-1.39	-1.62	-0.78	-3.62	0.15	-1.87	1.24	-0.1	-0.16	0.95
1.7	-2.63	-3.6	-1.12	-1.53	-0.78	-3.54	0.14	-1.81	1.2	-0.11	-0.24	0.97
1.71667	-2.51	-3.45	-0.98	-1.28	-0.84	-3.47	0.25	-1.8	1.19	-0.06	-0.14	0.96
1.73333	-2.42	-3.21	-0.98	-1.14	-0.98	-3.43	0.29	-1.83	1.22	-0.01	-0.03	0.91
1.75	-2.37	-3.17	-1	-1.13	-1.06	-3.41	0.45	-1.82	1.29	0	0.06	0.89
1.76667	-2.29	-3.05	-0.98	-1.47	-1.32	-3.31	0.52	-1.76	1.34	-0.08	0.12	0.65
1.78333	-2.22	-2.96	-0.96	-1.43	-1.27	-3.16	0.52	-1.76	1.34	-0.17	0.13	0.7
1.8	-2.14	-2.91	-0.95	-1.41	-1.24	-3.03	0.47	-1.76	1.19	-0.26	0.04	0.99
1.81667	-2.07	-2.86	-0.92	-1.42	-1.27	-2.91	0.43	-1.7	1.06	-0.32	-0.05	1.01
1.83333	-2	-2.59	-0.9	-1.18	-1.25	-2.81	0.4	-1.63	0.96	-0.34	-0.04	0.92
1.85	-1.9	-2.47	-0.94	-0.99	-1.1	-2.72	0.35	-1.55	0.69	-0.32	-0.02	0.89
1.86667	-1.85	-2.52	-1.11	-0.97	-0.99	-2.63	0.28	-1.48	0.57	-0.27	-0.08	0.82
1.88333	-1.93	-2.5	-1.27	-0.93	-0.82	-2.72	0.24	-1.51	0.46	-0.19	-0.13	0.79
1.9	-1.97	-2.45	-1.28	-0.86	-0.53	-2.98	0.3	-1.53	0.37	0.04	0.18	0.75
1.91667	-1.83	-2.32	-1.16	-0.79	-0.32	-3.13	0.32	-1.52	0.39	0.26	0.26	0.69
1.93333	-1.7	-2.25	-0.93	-0.78	-0.35	-3.28	0.3	-1.49	0.3	0.4	0.11	0.59
1.95	-1.74	-2.19	-0.8	-0.72	-0.38	-3.43	0.29	-1.46	0.24	0.52	-0.17	0.58
1.96667	-1.85	-1.8	-0.76	-0.63	-0.3	-3.54	0.32	-1.44	0.29	0.61	-0.15	0.69
1.98333	-1.79	-1.75	-0.78	-0.53	-0.16	-3.58	0.27	-1.43	0.44	0.76	0.06	0.88
2	-1.72	-1.76	-0.89	-0.44	-0.1	-3.59	0.26	-1.45	0.42	0.76	-0.24	0.98
2.01667	-1.63	-1.64	-0.95	-0.76	0.01	-3.55	0.38	-1.48	0.3	0.7	-0.5	0.96
2.03333	-1.49	-1.52	-1.01	-0.88	0.17	-3.5	0.48	-1.43	0.3	0.57	-0.36	0.74
2.05	-1.45	-1.39	-1.01	-0.58	0.23	-3.44	0.57	-1.28	0.49	0.4	0.02	0.67
2.06667	-1.35	-0.99	-0.98	-0.23	0.18	-3.42	0.64	-1.16	0.64	0.24	0.21	0.69
2.08333	-1.28	-0.86	-0.93	-0.23	0.18	-3.34	0.73	-1.17	0.81	0.17	0.27	0.88
2.1	-1.25	-0.74	-0.91	-0.46	0.26	-3.27	0.77	-1.04	0.99	0.11	0.27	1.07
2.11667	-1.17	-0.62	-0.83	-0.46	0.31	-3.22	0.82	-0.88	1.15	0.09	0.44	1.15
2.13333	-1.1	-0.56	-0.8	-0.5	0.33	-3.16	0.83	-1	1.34	0.16	0.57	1.15
2.15	-1.04	-0.45	-0.82	-0.55	0.33	-3.08	0.83	-1.18	1.48	0.2	0.63	1.13
2.16667	-1.02	-0.33	-0.82	-0.66	0.36	-3	0.84	-1.53	1.53	0.15	0.61	1.09
2.18333	-1.04	-0.2	-0.81	-0.75	0.45	-2.9	0.84	-1.9	1.59	0.07	0.57	1.05
2.2	-1.03	-0.13	-0.77	-0.83	0.49	-2.73	0.84	-2.17	1.64	0.1	0.5	0.98
2.21667	-1.16	0	-0.74	-0.86	0.49	-2.65	0.83	-2.54	1.7	0.12	0.48	0.82
2.23333	-1.25	0.17	-0.72	-0.85	0.49	-2.69	0.8	-2.72	1.59	0.12	0.49	0.59
2.25	-1.27	0.18	-0.7	-0.86	0.48	-2.75	0.74	-2.76	1.42	0.13	0.48	0.2
2.26667	-1.2	0.29	-0.7	-0.77	0.38	-2.79	0.74	-3	1.33	0.22	0.42	-0.16
2.28333	-1.08	0.52	-0.64	-0.48	0.29	-2.79	0.78	-3.22	1.22	0.26	0.37	-0.42
2.3	-0.92	0.56	-0.49	-0.39	0.27	-2.7	0.79	-3.17	1.23	0.36	0.35	-0.51
2.31667	-0.88	0.61	-0.36	-0.57	0.29	-2.67	0.81	-3.13	1.24	0.41	0.3	-0.44
2.33333	-0.78	0.68	-0.24	-0.6	0.33	-2.63	0.83	-3.06	1.26	0.45	0.31	-0.53
2.35	-0.7	0.76	-0.19	-0.39	0.39	-2.66	0.85	-3.05	1.28	0.49	0.33	-0.64
2.36667	-0.6	0.85	-0.07	-0.46	0.36	-2.78	0.91	-3.04	1.32	0.5	0.39	-0.72
2.38333	-0.44	0.89	0.1	-0.47	0.3	-2.77	1	-2.92	1.31	0.43	0.41	-0.78
2.4	-0.28	1	0.38	-0.26	0.2	-2.77	1.06	-2.61	1.23	0.35	0.45	-0.88
2.41667	-0.27	1.15	1.16	-0.13	0.13	-2.75	1.1	-2.14	1.14	0.27	0.49	-0.91
2.43333	-0.32	1.22	1.24	-0.08	0.1	-2.73	1.12	-1.77	1	0.21	0.51	-0.89
2.45	-0.31	1.26	1.15	-0.03	0.04	-2.73	1.11	-1.63	0.86	0.19	0.42	-0.85
2.46667	-0.32	1.29	1.04	0.07	0.01	-2.72	1.1	-1.53	0.76	0.2	0.38	-0.79
2.48333	-0.33	1.28	1	0.14	0.11	-2.69	0.91	-1.44	0.7	0.24	0.37	-0.73
2.5	-0.32	1.24	0.94	0.21	0.17	-2.63	0.85	-1.29	0.64	0.27	0.33	-0.69
2.51667	-0.31	1.27	0.9	0.3	0.2	-2.55	0.89	-1.14	0.58	0.3	0.28	-0.58
2.53333	-0.31	1.34	0.76	0.28	0.26	-2.48	0.9	-1.05	0.52	0.34	0.29	-0.4
2.55	-0.26	1.21	0.61	0.25	0.34	-2.4	0.75	-1.04	0.4	0.38	0.28	-0.08
2.56667	-0.07	1.19	0.53	0.26	0.37	-2.32	0.66	-1.18	0.32	0.41	0.2	0.14
2.58333	0	1.22	0.51	0.27	0.4	-2.21	0.75	-1.32	0.27	0.48	0.15	0.37
2.6	0	1.05	0.59	0.41	0.41	-2.08	0.8	-1.37	0.26	0.54	0.13	0.6
2.61667	0.09	1.01	0.65	0.43	0.39	-1.97	0.79	-1.36	0.27	0.59	0.1	0.68
2.63333	0.1	0.95	0.23	0.39	0.39	-1.86	0.54	-1.33	0.27	0.58	0.12	0.81
2.65	0.15	0.92	0.11	0.45	0.42	-1.76	0.31	-1.3	0.24	0.59	0.13	0.97
2.66667	0.11	0.93	0.06	0.52	0.46	-1.69	0.27	-1.38	0.26	0.58	0.14	1.03
2.68333	0.04	0.97	-0.03	0.54	0.52	-1.61	0.37	-1.43	0.23	0.6	0.13	1.06
2.7	-0.01	1.01	-0.06	0.58	0.52	-1.52	0.33	-1.39	0.14	0.6	0.14	1.13
2.71667	0.03	1.05	-0.07	0.66	0.43	-1.46	-0.21	-1.31	-0.01	0.58	0.17	1.22
2.73333	0	1.08	-0.1	0.64	0.29	-1.4	-0.4	-1.21	-0.07	0.58	0.2	1.36
2.75	-0.19	1.03	-0.18	0.47	0.21	-1.32	-0.41	-1.09	-0.04	0.56	0.29	1.38
2.76667	-0.23	1	-0.25	0.33	0.17	-1.24	-0.38	-0.99	0.08	0.5	0.31	1.39
2.78333	-0.23	0.98	-0.34	0.06	0.15	-1.18	-0.22	-0.92	0.11	0.42	0.3	1.34
2.8	-0.31	0.97	-0.39	-0.25	0.15	-1.09	0	-0.87	0.04	0.35	0.31	1.31
2.81667	-0.32	0.99	-0.34	-0.29	0.19	-1.03	0.06	-0.87	0	0.29	0.31	1.23
2.83333	-0.25	1.05	-0.27	-0.25	0.22	-0.96	0.06	-0.95	-0.01	0.23	0.32	1.09
2.85	-0.2	1.11	-0.25	-0.44	0.23	-0.91	0.19	-1.06	0.03	0.17	0.34	0.88
2.86667	-0.15	1.16	-0.21	-0.5	0.31	-0.9	0.16	-1.14	0.06	0.11	0.36	0.76
2.88333	-0.05	1.19	-0.18	-0.47	0.42	-0.96	0.13	-1.14	0.07	0.11	0.32	0.83
2.9	0.08	1.24	-0.18	-0.72	0.47	-1.07	0.14	-1.1	0.07	0.17	0.28	0.89
2.91667	0.27	1.27	-0.35	-0.84	0.32	-1.23	0.11	-1.04	0.11	0.24	0.15	0.95
2.93333	0.35	1.28	-0.33	-0.52	0.19	-1.31	0.06	-0.97	0.13	0.25	0.07	1.02
2.95	0.32	1.26	-0.24	-0.37	0.14	-1.32	-0.01	-0.9	0.13	0.27	0.03	1.09
2.96667	0.22	1.23	-0.13	-0.22	0.26	-1.33	-0.07	-0.85	0.12	0.31	0.01	1.21
2.98333	0.33	1.24	0.02	0.04	0.38	-1.46	-0.1	-0.81	0.11	0.32	0.01	1.29
3	0.4	1.22	0.07	0.31	0.5	-1.63	-0.25	-0.82	0.05	0.25	0.02	1.32
3.01667	0.36	1.24	0.1	0.22	0.57	-1.8	-0.31	-0.92	0.03	0.16	-0.02	1.34
3.03333	0.32	1.26	0.11	0.23	0.53	-1.96	-0.33	-0.98	0.11	0.13	-0.09	1.33
3.05	0.29	1.25	0.15	0.15	0.47	-2.11	-0.36	-0.93	0.1	0.14	-0.11	1.31
3.06667	0.28	1.15	0.18	-0.18	0.48	-2.23	-0.37	-0.79	0.17	0.14	-0.11	1.27
3.08333	0.27	1.14	0.21	-0.34	0.52	-2.33	-0.35	-0.78	0.4	0.14	-0.09	1.21
3.1	0.23	1.2	0.21	-0.41	0.56	-2.37	-0.29	-0.78	0.62	0.16	-0.08	1.13
3.11667	0.24	1.25	0.14	-0.36	0.62	-2.38	-0.22	-0.75	0.78	0.2	-0.09	1.05
3.13333	0.27	1.26	-0.06	-0.3	0.68	-2.38	-0.16	-0.71	0.9	0.22	-0.11	1
3.15	0.28	1.26	-0.19	-0.24	0.68	-2.34	-0.11	-0.7	0.99	0.24	-0.16	0.98
3.16667	0.29	1.23	-0.13	-0.2	0.65	-2.26	-0.08	-0.74	1.02	0.21	-0.2	0.97
3.18333	0.26	1.15	-0.08	-0.17	0.73	-2.2	-0.08	-0.77	0.98	0.14	-0.2	0.95
3.2	0.23	1.23	-0.04	-0.16	0.76	-2.08	-0.07	-0.79	0.9	0.03	-0.22	0.93
3.21667	0.18	1.27	0.05	-0.23	0.55	-1.96	-0.03	-0.75	0.83	-0.1	-0.26	0.86
3.23333	0.1	1.29	0.12	-0.26	0.59	-1.99	0	-0.7	0.8	-0.16	-0.22	0.79
3.25	0.12	1.29	0.17	-0.19	0.98	-2.02	0.01	-0.65	0.78	-0.17	-0.17	0.75
3.26667	0.12	1.29	0.14	-0.08	1.05	-1.99	0.04	-0.59	0.7	-0.18	-0.15	0.71
3.28333	-0.03	1.3	0.12	0.04	0.86	-2.09	0.06	-0.41	0.65	-0.22	-0.14	0.66
3.3	-0.1	1.28	0.09	0.04	0.79	-2.19	0.06	-0.27	0.55	-0.13	-0.07	0.63
3.31667	-0.16	1.22	0.11	0.03	0.82	-2.35	0.1	-0.18	0.47	0.15	0.16	0.65
3.33333	-0.05	1.16	0.14	0.12	0.81	-2.64	0.16	-0.13	0.39	0.2	0.35	0.66
3.35	0.05	1.07	0.21	0.17	0.76	-2.53	0.22	-0.07	0.34	0.24	0.57	0.68
3.36667	0.07	1.05	0.38	0.18	0.79	-2.45	0.26	-0.03	0.3	0.58	0.8	0.7
3.38333	0.03	0.97	0.55	0.25	0.86	-2.49	0.27	-0.02	0.18	0.99	0.99	0.59
3.4	0.06	0.8	0.7	0.28	0.93	-2.8	0.3	-0.01	-0.05	0.91	1.18	0.54
3.41667	0.18	0.62	0.95	0.29	1.21	-2.95	0.29	-0.05	-0.25	0.84	1.37	0.51
3.43333	0.16	0.74	1.12	0.32	1.34	-2.87	0.28	-0.31	-0.38	1	1.54	0.47
3.45	0.13	0.87	1.17	0.41	1.27	-2.82	0.27	-0.53	-0.47	1.05	1.46	0.46
3.46667	0.15	0.93	1.22	0.41	1.23	-2.76	0.25	-0.52	-0.75	1.2	0.67	0.46
3.48333	0.17	0.67	1.31	0.42	1.24	-2.41	0.24	-0.54	-0.94	1.29	0.44	0.49
3.5	0.18	0.47	1.38	0.48	1.22	-2.24	0.22	-0.57	-1.06	1.33	0.09	0.49
3.51667	0.2	0.42	1.45	0.5	1.13	-2.35	0.15	-0.69	-1.12	1.24	-0.15	0.5
3.53333	0.21	0.56	1.48	0.46	1.03	-2.83	0.03	-0.8	-1.28	1.14	-0.05	0.56
3.55	0.23	0.87	1.46	0.39	0.96	-3.23	0.04	-0.84	-1.43	1.08	-0.06	0.62
3.56667	0.25	0.88	1.35	0.39	0.9	-3.31	0.09	-0.84	-1.51	1.04	-0.04	0.66
3.58333	0.3	0.8	1.35	0.4	0.84	-3.08	0.06	-0.85	-1.41	0.91	-0.05	0.57
3.6	0.28	0.59	1.3	0.44	0.86	-3.08	0.06	-0.86	-1.36	0.78	-0.19	0.43
3.61667	0.27	0.02	1.23	0.82	0.91	-3.11	0.05	-0.85	-1.39	0.6	-0.42	0.53
3.63333	0.29	-0.17	1.36	1.06	1.01	-3.14	-0.12	-0.88	-1.29	0.38	-0.66	0.72
3.65	0.3	-0.16	1.45	1.16	1.04	-3.03	-0.02	-0.92	-1.16	0.19	-0.81	0.7
3.66667	0.29	-0.1	1.5	1.17	1.03	-2.92	0.01	-0.91	-1.02	-0.11	-0.9	0.53
3.68333	0.29	-0.01	1.48	1.18	0.98	-2.79	0.02	-0.86	-0.89	-0.38	-1.07	0.5
3.7	0.29	0.09	1.58	1.21	0.89	-2.72	0.05	-0.77	-0.76	-0.52	-1.21	0.8
3.71667	0.27	0.16	1.56	1.19	0.85	-2.65	0.1	-0.6	-0.66	-0.84	-1.27	0.85
3.73333	0.3	0.22	1.47	1.17	0.8	-2.53	0.12	-0.53	-0.45	-1.05	-1.33	0.84
3.75	0.31	0.24	1.39	1.15	0.76	-2.43	0.09	-0.57	-0.35	-1.14	-1.38	0.82
3.76667	0.34	0.24	1.17	1.14	0.74	-2.41	0.18	-0.65	-0.28	-1.06	-1.36	0.86
3.78333	0.55	0.23	1.05	1.14	0.69	-2.37	0.25	-0.61	-0.16	-1.09	-1.33	0.88
3.8	0.6	0.26	0.94	1.14	0.62	-2.32	0.24	-0.54	-0.06	-1.1	-1.38	0.83
3.81667	0.6	0.24	1.02	1.13	0.61	-2.2	0.21	-0.48	-0.17	-1.04	-1.39	0.85
3.83333	0.57	0.19	1.1	1.11	0.61	-2.11	0.21	-0.44	-0.24	-0.94	-1.34	1.07
3.85	0.55	0.1	1	1.13	0.62	-2.09	0.2	-0.42	-0.25	-0.81	-1.27	1.26
3.86667	0.56	0.07	0.92	1.1	0.62	-2.09	0.19	-0.51	-0.23	-0.57	-1.1	1.46
3.88333	0.55	0.07	1.04	1.08	0.58	-2.2	0.2	-0.73	-0.15	-0.69	-0.9	1.22
3.9	0.52	0.07	0.95	1.31	0.53	-2.34	0.21	-0.85	0.08	-0.78	-0.85	0.88
3.91667	0.39	0.09	0.78	1.27	0.49	-2.36	0.21	-0.91	0.24	-0.78	-0.82	0.77
3.93333	0.32	0.15	0.76	0.94	0.49	-2.51	0.2	-0.93	0.26	-0.69	-0.87	0.65
3.95	0.36	0.21	0.98	0.83	0.48	-2.75	0.14	-0.9	0.24	-0.62	-0.85	0.33
3.96667	0.38	0.37	1.37	0.82	0.49	-2.88	0.17	-0.84	0.24	-0.56	-0.79	0.03
3.98333	0.39	0.49	1.41	0.93	0.46	-2.87	0.18	-0.79	0.21	-0.52	-0.82	-0.34
4	0.39	0.53	1.29	0.99	0.41	-3.04	0.23	-0.74	0.16	-0.46	-0.84	-0.66
4.01667	0.35	0.6	0.88	1	0.36	-3.25	0.29	-0.78	0.16	-0.44	-0.79	-0.82
4.03333	0.42	0.79	0.66	0.98	0.35	-3.53	0.27	-0.85	0.21	-0.45	-0.7	-0.96
4.05	0.46	0.99	0.7	0.92	0.3	-3.71	0.27	-0.88	0.19	-0.44	-0.62	-1.06
4.06667	0.12	1.02	0.53	0.75	0.19	-3.79	0.35	-0.93	0.12	-0.41	-0.55	-0.99
4.08333	0.07	1.08	0.43	0.74	0.2	-3.86	0.43	-1.2	-0.02	-0.41	-0.49	-0.81
4.1	0.05	1.17	0.39	0.62	0.25	-3.87	0.46	-1.58	-0.16	-0.44	-0.39	-0.82
4.11667	-0.04	1.2	0.2	0.12	0.26	-3.87	0.51	-1.89	-0.13	-0.47	-0.28	-0.84
4.13333	-0.13	1.22	-0.08	0.39	0.24	-3.84	0.62	-1.91	-0.08	-0.5	-0.21	-0.76
4.15	-0.23	1.2	-0.08	0.6	0.21	-3.78	0.67	-1.88	-0.01	-0.53	-0.15	-0.67
4.16667	-0.31	1.13	-0.09	-0.21	0.13	-3.77	0.64	-2.1	0.05	-0.56	-0.1	-0.45
4.18333	-0.3	1.06	-0.35	0.18	0.05	-3.75	0.57	-2.47	0.08	-0.58	0.07	-0.29
4.2	-0.33	1.06	-0.51	0.73	-0.01	-3.71	0.5	-2.58	0.05	-0.66	0.31	-0.29
4.21667	-0.48	1.05	-0.48	0.85	-0.01	-3.64	0.43	-2.19	0.13	-0.78	0.31	-0.37
4.23333	-0.6	1.07	-0.41	0.86	0	-3.6	0.22	-2.07	0.14	-0.89	0.32	-0.39
4.25	-0.7	1.05	-0.5	0.8	-0.02	-3.58	0.17	-1.96	0.13	-0.97	0.34	-0.37
4.26667	-0.66	1.02	-0.6	0.8	0.01	-3.54	0.22	-1.8	0.15	-1.01	0.37	-0.3
4.28333	-0.65	1.01	-0.64	0.85	-0.07	-3.51	0.24	-1.69	0.18	-1	0.33	-0.28
4.3	-0.62	0.99	-0.63	0.75	-0.12	-3.45	0.32	-1.73	0.23	-0.96	0.34	-0.26
4.31667	-0.52	0.9	-0.58	0.71	-0.16	-3.37	0.41	-1.82	0.27	-0.89	0.38	-0.21
4.33333	-0.41	0.82	-0.54	0.78	-0.17	-3.25	0.4	-1.78	0.28	-0.79	0.33	-0.14
4.35	-0.3	0.72	-0.48	0.71	-0.2	-3.18	0.4	-1.69	0.31	-0.65	0.18	-0.05
4.36667	-0.2	0.65	-0.42	0.5	-0.21	-3.16	0.41	-1.53	0.38	-0.53	-0.13	-0.02
4.38333	-0.27	0.59	-0.37	0.36	-0.05	-3.02	0.36	-1.39	0.44	-0.4	-0.19	-0.02
4.4	-0.36	0.62	-0.34	0.14	-0.01	-2.85	0.24	-1.27	0.3	-0.27	-0.21	-0.02
4.41667	-0.4	0.67	-0.28	0.12	-0.03	-2.72	0.11	-1.08	-0.07	-0.22	-0.26	0
4.43333	-0.36	0.63	-0.2	0.23	-0.09	-2.57	-0.08	-0.98	-0.35	-0.25	-0.32	0.09
4.45	-0.32	0.57	-0.17	0.3	-0.09	-2.38	-0.23	-0.91	-0.54	-0.31	-0.37	0.17
4.46667	-0.23	0.57	-0.19	0.38	-0.04	-2.3	-0.41	-0.79	-0.64	-0.32	-0.39	0.2
4.48333	-0.07	0.59	-0.26	0.44	-0.08	-2.3	-0.55	-0.65	-0.7	-0.33	-0.43	0.19
4.5	-0.03	0.62	-0.32	0.48	-0.13	-2.28	-0.69	-0.59	-0.8	-0.34	-0.45	0.12
4.51667	-0.03	0.62	-0.32	0.55	-0.13	-2.29	-0.79	-0.59	-0.95	-0.3	-0.44	0.09
4.53333	-0.03	0.57	-0.3	0.61	-0.13	-2.31	-0.93	-0.64	-1.14	-0.23	-0.43	0.08
4.55	-0.12	0.54	-0.27	0.59	-0.14	-2.3	-1.27	-0.79	-1.44	-0.16	-0.39	0.07
4.56667	-0.12	0.51	-0.26	0.6	-0.11	-2.25	-1.62	-0.9	-1.75	-0.12	-0.29	0.09
4.58333	-0.11	0.5	-0.26	0.62	-0.07	-2.2	-1.79	-0.93	-1.94	-0.03	-0.25	0.11
4.6	-0.07	0.47	-0.51	0.69	-0.04	-2.1	-1.82	-1	-1.89	0.11	-0.22	0.07
4.61667	-0.03	0.43	-0.69	0.63	0	-1.99	-1.81	-1.06	-1.88	0.19	-0.18	-0.01
4.63333	0	0.41	-0.73	0.55	0.04	-1.92	-1.74	-1.09	-1.94	0.28	-0.15	-0.06
4.65	0.02	0.43	-0.72	0.58	0.06	-1.85	-1.63	-1.11	-1.93	0.36	-0.05	-0.1
4.66667	0.06	0.43	-0.62	0.66	0.06	-1.81	-1.51	-1.1	-1.79	0.4	0.01	-0.11
4.68333	0.09	0.4	-0.55	0.73	0.01	-1.76	-1.36	-1.09	-1.59	0.39	0.08	-0.1
4.7	0.14	0.5	-0.55	0.63	0.02	-1.68	-1.24	-1.1	-1.55	0.36	0.1	-0.1
4.71667	0.21	0.49	-0.54	0.32	0.06	-1.65	-1.12	-1.1	-1.53	0.33	0.1	-0.18
4.73333	0.26	0.48	-0.52	0.26	0.07	-1.64	-1.04	-0.98	-1.49	0.32	0.11	-0.27
4.75	0.26	0.42	-0.51	0.37	0.04	-1.65	-0.87	-0.82	-1.47	0.32	0.18	-0.29
4.76667	0.26	0.38	-0.46	0.75	0	-1.56	-0.94	-0.75	-1.34	0.34	0.2	-0.28
4.78333	0.27	0.36	-0.29	0.9	-0.03	-1.49	-1	-0.72	-1.27	0.32	0.04	-0.4
4.8	0.28	0.37	-0.19	0.85	-0.06	-1.42	-0.99	-0.61	-1.22	0.27	-0.22	-0.42
4.81667	0.27	0.41	-0.17	0.79	-0.1	-1.28	-0.94	-0.58	-1.26	0.26	-0.31	-0.01
4.83333	0.26	0.43	-0.19	1	-0.16	-1.22	-0.9	-0.66	-1.24	0.3	-0.19	0.42
4.85	0.3	0.42	-0.22	1.33	-0.17	-1.15	-0.88	-0.72	-1.2	0.32	0.27	0.47
4.86667	0.34	0.38	-0.24	1.3	-0.13	-1.11	-0.82	-0.74	-1.29	0.32	0.46	0.49
4.88333	0.37	0.34	-0.27	1.17	-0.11	-1.06	-0.75	-0.78	-1.35	0.32	0.41	0.56
4.9	0.36	0.34	-0.27	1.21	-0.09	-1.02	-0.73	-0.81	-1.33	0.28	0.31	0.56
4.91667	0.28	0.33	-0.22	1.21	-0.08	-0.95	-0.78	-0.89	-1.37	0.2	0.61	0.63
4.93333	0.19	0.32	-0.21	1.45	-0.06	-0.93	-0.85	-0.95	-1.43	0.13	0.86	0.69
4.95	0.19	0.27	-0.22	1.68	-0.05	-0.88	-0.96	-0.87	-1.42	0.09	0.92	0.67
4.96667	0.23	0.24	-0.24	1.8	-0.16	-0.78	-0.99	-0.77	-1.37	0.03	1.05	0.55
4.98333	0.27	0.25	-0.22	1.86	-0.21	-0.74	-0.99	-0.75	-1.35	-0.12	1.23	0.58
5	0.29	0.26	-0.2	1.88	-0.24	-0.7	-1	-0.87	-1.36	-0.12	1.35	0.62
5.01667	0.34	0.28	-0.21	1.91	-0.24	-0.64	-1	-0.97	-1.35	-0.12	1.41	0.63
5.03333	0.31	0.28	-0.41	1.99	-0.13	-0.59	-1.03	-0.99	-1.32	-0.14	1.53	0.61
5.05	0.31	0.28	-0.71	2.05	-0.04	-0.54	-1.1	-0.95	-1.23	-0.1	1.62	0.59
5.06667	0.35	0.3	-0.88	2.05	0.11	-0.46	-1.15	-0.92	-1.09	-0.06	1.52	0.56
5.08333	0.38	0.3	-1.06	2.05	0.11	-0.39	-1.18	-0.96	-0.97	-0.05	1.4	0.55
5.1	0.4	0.3	-1.04	2.1	0.07	-0.43	-1.19	-0.97	-0.87	0	1.44	0.55
5.11667	0.38	0.33	-0.59	2.21	0.1	-0.31	-1.19	-0.89	-0.73	0.02	1.45	0.49
5.13333	0.34	0.35	-0.31	2.2	0.12	-0.26	-1.11	-0.64	-0.63	0.01	1.39	0.42
5.15	0.31	0.32	-0.23	2.15	0.15	-0.24	-1.04	-0.55	-0.54	-0.01	1.35	0.44
5.16667	0.3	0.3	-0.15	2.12	0.17	-0.19	-1.04	-0.5	-0.46	0.04	1.12	0.47
5.18333	0.3	0.25	-0.11	2.11	0.16	-0.31	-1	-0.52	-0.37	0.07	1.21	0.44
5.2	0.29	0.15	-0.09	2.06	0.15	-0.38	-0.92	-0.56	-0.31	0.05	1.61	0.45
5.21667	0.35	0.16	-0.13	2	0.11	-0.34	-0.87	-0.85	-0.28	0.04	1.75	0.54
5.23333	0.44	0.38	-0.15	1.94	0.06	-0.46	-0.81	-0.93	-0.27	0.06	1.82	0.59
5.25	0.48	0.51	-0.14	1.92	0.09	-0.62	-0.72	-0.87	-0.27	0.05	1.82	0.6
5.26667	0.51	0.28	-0.11	1.7	0.13	-0.76	-0.61	-0.84	-0.26	0.01	1.72	0.59
5.28333	0.55	0.04	-0.09	1.52	0.21	-0.86	-0.5	-0.81	-0.23	0.03	1.58	0.59
5.3	0.52	-0.1	-0.1	1.45	0.28	-0.89	-0.2	-0.66	-0.25	0.04	1.4	0.51
5.31667	0.46	-0.04	-0.17	1.56	0.33	-0.93	0.08	-0.56	-0.35	-0.07	1.21	0.33
5.33333	0.42	-0.11	-0.21	1.8	0.3	-1.04	0.17	-0.49	-0.42	-0.18	1.06	0.13
5.35	0.39	-0.13	-0.24	1.89	0.25	-1.1	0.09	-0.47	-0.49	-0.26	0.97	0.05
5.36667	0.4	-0.11	-0.21	1.89	0.21	-1.12	0.02	-0.57	-0.53	-0.32	0.94	0.02
5.38333	0.4	-0.09	-0.11	1.76	0.16	-1.11	-0.01	-0.56	-0.56	-0.39	0.8	0.05
5.4	0.4	-0.08	-0.08	1.42	0.12	-1.12	-0.04	-0.48	-0.59	-0.46	0.68	0.12
5.41667	0.42	-0.01	-0.09	1.19	0.17	-1.1	-0.1	-0.44	-0.57	-0.51	0.64	0.2
5.43333	0.43	0.08	-0.16	1.11	0.25	-1.03	-0.15	-0.43	-0.54	-0.54	0.6	0.24
5.45	0.41	0.25	-0.17	0.99	0.29	-0.88	-0.14	-0.45	-0.51	-0.53	0.46	0.21
5.46667	0.39	0.47	-0.12	0.89	0.32	-0.74	-0.12	-0.49	-0.48	-0.5	0.32	0.17
5.48333	0.41	0.77	-0.07	0.86	0.33	-0.61	-0.17	-0.51	-0.5	-0.44	0.14	0.22
5.5	0.41	0.91	-0.05	0.84	0.3	-0.42	-0.2	-0.52	-0.48	-0.37	0.01	0.36
5.51667	0.41	0.98	-0.11	0.77	0.36	-0.26	-0.22	-0.55	-0.45	-0.29	-0.17	0.47
5.53333	0.41	1.02	-0.22	0.75	0.41	-0.13	-0.33	-0.72	-0.5	-0.2	-0.33	0.51
5.55	0.39	1.12	-0.22	0.75	0.43	-0.05	-0.28	-0.83	-0.55	-0.12	-0.5	0.48
5.56667	0.41	1.24	-0.22	0.67	0.44	0	-0.18	-0.83	-0.55	0.08	-0.57	0.38
5.58333	0.41	1.34	-0.21	0.59	0.46	0.06	-0.07	-0.81	-0.53	0.35	-0.6	0.27
5.6	0.45	1.41	-0.21	0.55	0.46	0.23	0.05	-0.83	-0.55	0.55	-0.6	0.19
5.61667	0.65	1.5	-0.25	0.56	0.41	0.42	0.07	-0.87	-0.59	0.77	-0.6	0.15
5.63333	0.82	1.58	-0.23	0.6	0.3	0.51	0.01	-0.91	-0.61	1.08	-0.61	0.16
5.65	0.87	1.61	-0.2	0.7	0.21	0.59	0.04	-0.94	-0.44	1.19	-0.62	0.16
5.66667	0.98	1.61	-0.22	0.99	0.19	0.61	0.09	-0.95	-0.32	1.32	-0.61	0.12
5.68333	1.04	1.65	-0.2	1.1	0.12	0.56	0.04	-0.96	-0.25	1.45	-0.64	0.11
5.7	1.08	1.75	-0.25	0.85	0.06	0.49	-0.01	-0.92	-0.29	1.5	-0.6	0.12
5.71667	1.17	1.76	-0.25	0.36	0.05	0.35	0.02	-0.88	-0.41	1.47	-0.62	0.11
5.73333	1.24	1.79	-0.2	0.16	0.07	0.29	0.01	-0.85	-0.46	1.38	-0.62	0.08
5.75	1.16	1.82	-0.15	0.1	0.1	0.36	0.07	-0.78	-0.51	1.31	-0.56	0.07
5.76667	1.12	1.95	-0.06	-0.19	0.17	0.4	0.15	-0.67	-0.58	1.29	-0.51	0.08
5.78333	1.17	2.11	0.04	-0.62	0.28	0.41	0.24	-0.6	-0.62	1.23	-0.62	0.05
5.8	1.19	2.19	0.15	-0.7	0.17	0.4	0.31	-0.51	-0.59	1.29	-0.82	-0.08
5.81667	1.09	2.04	0.26	-0.88	-0.12	0.72	0.29	-0.45	-0.56	1.35	-1.02	-0.08
5.83333	1.05	1.85	0.35	-1.03	-0.25	0.88	0.28	-0.4	-0.54	1.31	-1.26	0.1
5.85	0.99	1.79	0.38	-1.08	-0.26	0.95	0.29	-0.43	-0.51	1.29	-1.42	0.3
5.86667	0.83	1.82	0.36	-1.2	-0.22	1.04	0.32	-0.45	-0.5	1.31	-1.48	0.54
5.88333	0.61	1.86	0.29	-1.2	-0.08	1.23	0.32	-0.59	-0.46	1.38	-1.42	0.71
5.9	0.71	1.93	0.2	-0.95	0.05	1.27	0.33	-0.63	-0.45	1.21	-1.36	0.73
5.91667	0.82	2.05	0.14	-1.1	0.23	1.09	0.39	-0.56	-0.46	1.15	-1.28	0.46
5.93333	0.84	2.15	0.11	-1.27	0.74	0.73	0.51	-0.32	-0.44	1.22	-1.2	0.38
5.95	0.83	2.13	0.06	-1.34	0.92	0.64	0.52	-0.35	-0.38	1.04	-1.18	0.39
5.96667	0.82	2.02	-0.06	-1.37	1.03	0.63	0.46	-0.55	-0.34	0.94	-1.14	0.33
5.98333	0.82	1.92	-0.15	-1.36	1.11	0.64	0.46	-0.56	-0.36	0.88	-1.09	0.28
6	0.8	1.91	-0.18	-1.29	1.07	0.67	0.52	-0.56	-0.41	0.63	-1.04	0.17

## Sheet: Cap-IT AMG517
Time	Veh-IT	Veh-IT	Veh-IT	Cap-IT	Cap-IT	Cap-IT	Cap-IT	Cap-IT
	4214	4244	4249	4223	4229	42XX	4258	4241
-1	0.001311	0.522295	-0.0577	-0.13738	0.905902	0.71918	-0.59492	-0.17279
-0.98333	0.111311	0.282295	-0.1577	-0.16738	0.845902	0.61918	-0.64492	-0.25279
-0.96667	0.161311	0.042295	-0.1977	-0.18738	0.805902	0.45918	-0.63492	-0.25279
-0.95	0.181311	-0.0977	-0.2177	-0.15738	0.835902	0.28918	-0.55492	-0.17279
-0.93333	0.151311	-0.1277	-0.2277	-0.17738	0.885902	0.09918	-0.51492	-0.19279
-0.91667	0.121311	-0.1777	-0.0277	-0.19738	0.875902	-0.12082	-0.43492	-0.13279
-0.9	0.041311	-0.0077	0.202295	-0.25738	0.755902	-0.24082	-0.18492	-0.03279
-0.88333	-0.17869	-0.0577	-0.0377	-0.35738	0.775902	-0.30082	-0.07492	0.007213
-0.86667	-0.31869	-0.2877	-0.2977	-0.32738	0.805902	-0.22082	-0.02492	0.027213
-0.85	-0.36869	-0.6577	-0.2277	-0.23738	0.795902	-0.08082	0.005082	0.067213
-0.83333	-0.38869	-1.0077	-0.0377	-0.14738	0.775902	0.01918	0.015082	0.107213
-0.81667	-0.38869	-1.0377	0.082295	-0.07738	0.775902	0.11918	0.045082	0.147213
-0.8	-0.40869	-0.6677	0.192295	0.022623	0.745902	0.18918	0.115082	0.147213
-0.78333	-0.42869	-0.4177	0.252295	0.002623	0.675902	0.29918	0.155082	0.117213
-0.76667	-0.45869	-0.1677	0.232295	-0.02738	0.645902	0.16918	0.225082	0.107213
-0.75	-0.49869	0.012295	0.182295	-0.03738	0.555902	-0.10082	0.295082	0.087213
-0.73333	-0.52869	-0.0077	0.112295	-0.03738	0.445902	-0.11082	0.295082	0.127213
-0.71667	-0.52869	-0.1177	0.032295	0.052623	0.335902	0.03918	0.285082	0.147213
-0.7	-0.49869	0.082295	-0.0477	0.102623	0.195902	0.06918	0.275082	0.137213
-0.68333	-0.44869	0.242295	-0.0677	0.102623	0.115902	0.01918	0.235082	0.137213
-0.66667	-0.21869	0.052295	-0.1377	0.082623	-0.1041	0.13918	0.215082	0.157213
-0.65	-0.05869	-0.5777	-0.1677	0.092623	-0.1941	0.15918	0.285082	0.177213
-0.63333	-0.08869	-0.9377	-0.0477	0.112623	-0.2441	0.04918	0.315082	0.197213
-0.61667	-0.15869	-0.7477	0.072295	0.102623	-0.4041	-0.04082	0.365082	0.197213
-0.6	-0.03869	-0.3677	0.132295	0.072623	-0.9641	-0.04082	0.485082	0.207213
-0.58333	0.191311	-0.1877	0.182295	0.092623	-1.0241	0.10918	0.625082	0.177213
-0.56667	0.541311	0.072295	0.202295	0.112623	-0.5241	0.22918	0.705082	0.107213
-0.55	0.511311	0.132295	0.192295	0.132623	-0.1841	0.27918	0.725082	0.027213
-0.53333	0.201311	-0.0777	0.202295	0.182623	-0.1441	0.31918	0.735082	-0.02279
-0.51667	-0.08869	-0.1877	0.212295	0.212623	-0.2841	0.36918	0.715082	-0.07279
-0.5	-0.25869	-0.0877	0.212295	0.212623	-0.2141	0.38918	0.685082	-0.09279
-0.48333	-0.27869	-0.0677	0.172295	0.232623	-0.1341	0.34918	0.685082	-0.07279
-0.46667	-0.10869	-0.0777	0.092295	0.272623	-0.1141	0.33918	0.695082	0.007213
-0.45	0.021311	0.002295	0.132295	0.302623	-0.0741	0.31918	0.725082	0.117213
-0.43333	0.061311	0.162295	0.302295	0.322623	-0.0641	0.29918	0.745082	0.227213
-0.41667	0.211311	0.712295	0.502295	0.332623	0.005902	0.22918	0.765082	0.427213
-0.4	0.281311	1.06229	1.06229	0.302623	0.085902	0.14918	0.795082	0.517213
-0.38333	0.271311	1.24229	1.56229	0.282623	0.075902	0.03918	0.825082	0.347213
-0.36667	0.221311	0.702295	1.57229	0.312623	0.045902	-0.07082	0.775082	0.087213
-0.35	0.241311	-0.1277	1.3623	0.342623	0.045902	-0.17082	0.695082	-0.02279
-0.33333	0.231311	-0.2777	0.992295	0.332623	-0.1241	-0.32082	0.585082	-0.19279
-0.31667	0.201311	-0.2477	0.902295	0.292623	-0.3641	-0.41082	0.465082	-0.34279
-0.3	0.171311	-0.2377	0.782295	0.242623	-0.3441	-0.46082	0.165082	-0.31279
-0.28333	0.241311	-0.1877	0.652295	0.222623	-0.2341	-0.50082	0.035082	-0.18279
-0.26667	0.341311	-0.2577	0.302295	0.132623	-0.2141	-0.53082	-0.09492	-0.04279
-0.25	0.341311	-0.4477	-0.1177	0.032623	-0.2941	-0.62082	-0.28492	-0.00279
-0.23333	0.231311	-0.2877	-0.2077	-0.10738	-0.3941	-0.66082	-0.38492	0.067213
-0.21667	0.161311	-0.0477	-0.3877	-0.21738	-0.3541	-0.64082	-0.51492	0.097213
-0.2	0.151311	0.092295	-0.4877	-0.29738	-0.3741	-0.59082	-0.67492	0.197213
-0.18333	0.161311	0.042295	-0.5277	-0.37738	-0.3841	-0.50082	-0.82492	0.347213
-0.16667	0.041311	0.102295	-0.5577	-0.34738	-0.3841	-0.42082	-0.85492	0.427213
-0.15	0.041311	0.432295	-0.5677	-0.28738	-0.4741	-0.32082	-0.78492	0.377213
-0.13333	0.081311	0.542295	-0.7277	-0.23738	-0.5241	-0.23082	-0.89492	0.257213
-0.11667	0.071311	0.552295	-0.8077	-0.19738	-0.4941	-0.08082	-1.03492	0.207213
-0.1	0.091311	0.532295	-0.8377	-0.13738	-0.4541	0.07918	-0.98492	0.187213
-0.08333	0.091311	0.512295	-0.9277	-0.10738	-0.6541	0.16918	-0.86492	0.077213
-0.06667	0.051311	0.462295	-1.0277	-0.09738	-0.7041	0.18918	-0.80492	-0.37279
-0.05	0.071311	0.452295	-0.9977	-0.10738	-0.6741	0.14918	-0.72492	-0.78279
-0.03333	0.111311	0.422295	-0.9577	-0.13738	-0.6241	0.13918	-0.73492	-0.90279
-0.01667	0.141311	0.392295	-1.0077	-0.18738	-0.5841	0.10918	-0.74492	-0.99279
0	0.191311	0.412295	-0.9877	-0.27738	-0.4941	0.07918	-0.88492	-0.96279
0.016667	0.261311	0.332295	-0.9877	-0.32738	-0.3741	0.05918	-0.99492	-0.67279
0.033333	0.321311	0.252295	-1.0377	-0.42738	-0.2341	-0.00082	-0.95492	-0.50279
0.05	0.321311	-0.0177	-1.0877	-0.59738	-0.1241	0.06918	-0.87492	0.067213
0.066667	0.381311	0.332295	-1.0677	-0.67738	-0.0741	0.23918	-0.81492	0.287213
0.083333	0.451311	0.382295	-2.2077	-0.71738	0.315902	0.27918	-0.68492	0.317213
0.1	0.511311	0.632295	-2.0777	-0.19738	0.085902	0.09918	-0.97492	0.217213
0.116667	0.611311	0.772295	-0.4377	-0.77738	-0.3041	0.19918	-0.42492	0.377213
0.133333	0.561311	0.602295	-0.7777	-0.74738	-0.7241	0.13918	-0.02492	0.237213
0.15	0.581311	0.652295	-0.7877	-0.47738	-0.8841	0.11918	0.075082	-0.09279
0.166667	0.591311	0.832295	-0.3177	-0.49738	-0.9441	0.13918	0.045082	-0.27279
0.183333	0.691311	0.772295	-0.2677	-0.74738	-1.1141	-0.07082	0.075082	-0.30279
0.2	0.671311	1.24229	-0.4777	-0.49738	-1.2041	0.03918	0.145082	-0.28279
0.216667	0.681311	1.57229	-0.4677	-0.53738	-1.1241	0.01918	0.245082	-0.48279
0.233333	0.721311	1.6223	-0.2477	-0.73738	-0.9341	0.02918	0.285082	-0.63279
0.25	0.621311	1.54229	-0.0877	-1.12738	-0.6741	0.17918	0.375082	-0.38279
0.266667	0.511311	1.6023	-0.0077	-1.10738	-0.3241	0.09918	0.505082	-0.04279
0.283333	0.481311	1.47229	0.092295	-0.84738	0.325902	0.00918	0.635082	0.307213
0.3	0.501311	1.02229	0.112295	-0.70738	0.865902	-0.06082	0.865082	0.497213
0.316667	0.501311	0.492295	0.052295	-0.58738	1.1459	0.06918	1.09508	0.607213
0.333333	0.651311	-0.0677	0.182295	-0.47738	1.4159	0.17918	1.08508	0.547213
0.35	0.981311	-0.2477	0.162295	-0.41738	1.6159	0.33918	0.935082	0.897213
0.366667	1.10131	-0.2477	0.082295	-0.33738	1.7459	0.48918	0.965082	1.21721
0.383333	0.681311	-0.1477	0.102295	-0.25738	1.4159	0.58918	1.01508	1.00721
0.4	0.671311	0.042295	0.152295	-0.26738	0.945902	0.74918	1.07508	0.637213
0.416667	0.721311	-0.1277	0.242295	-0.31738	0.745902	0.80918	1.08508	0.247213
0.433333	0.731311	-0.1777	0.252295	-0.11738	0.695902	0.89918	1.13508	0.157213
0.45	0.911311	-0.1077	0.152295	0.142623	0.585902	0.57918	1.24508	0.097213
0.466667	0.851311	-0.0777	-0.0077	0.072623	0.415902	0.56918	1.32508	0.117213
0.483333	0.561311	-0.1177	0.022295	-0.03738	0.555902	0.57918	1.38508	0.107213
0.5	0.451311	-0.0577	0.202295	0.052623	0.615902	0.59918	1.42508	0.067213
0.516667	0.411311	0.032295	0.272295	0.002623	0.585902	0.55918	1.29508	-0.00279
0.533333	0.351311	-0.1277	0.232295	-0.03738	0.655902	0.57918	1.24508	0.067213
0.55	0.281311	-0.1477	0.172295	0.102623	0.545902	0.58918	1.27508	0.147213
0.566667	0.271311	0.052295	0.242295	0.152623	0.565902	0.49918	1.30508	-0.00279
0.583333	0.391311	0.052295	0.332295	0.122623	0.785902	0.39918	1.30508	-0.16279
0.6	0.591311	0.042295	0.412295	0.282623	0.875902	0.37918	1.22508	-0.24279
0.616667	0.711311	0.022295	0.362295	0.482623	1.0059	0.40918	1.03508	-0.29279
0.633333	0.761311	-0.0477	0.302295	0.562623	1.1459	0.43918	1.03508	-0.43279
0.65	0.731311	-0.0077	0.262295	0.592623	1.2859	0.48918	1.06508	-0.50279
0.666667	0.751311	0.342295	0.172295	0.652623	1.3659	0.48918	1.07508	-0.26279
0.683333	0.771311	0.602295	0.132295	0.662623	0.915902	0.30918	1.08508	0.167213
0.7	0.751311	0.112295	0.112295	0.622623	0.745902	0.13918	1.10508	0.157213
0.716667	0.711311	-0.5577	0.252295	0.582623	0.715902	0.02918	1.17508	-0.37279
0.733333	0.691311	-0.9477	0.412295	0.632623	0.785902	-0.01082	1.15508	-0.52279
0.75	0.731311	-0.8577	0.132295	0.732623	0.795902	-0.16082	1.07508	-0.47279
0.766667	0.781311	-0.4077	0.282295	0.782623	0.745902	-0.35082	0.985082	-0.42279
0.783333	0.841311	-0.2477	0.542295	0.722623	0.755902	-0.53082	0.895082	-0.33279
0.8	0.901311	-0.1377	0.592295	0.542623	0.745902	-0.64082	0.785082	-0.26279
0.816667	0.911311	-0.0977	0.702295	0.452623	0.755902	-0.64082	0.725082	-0.19279
0.833333	0.891311	0.062295	0.792295	0.402623	0.805902	-0.62082	0.665082	-0.09279
0.85	0.881311	0.262295	0.782295	0.392623	0.825902	-0.57082	0.545082	-0.04279
0.866667	0.881311	0.202295	0.922295	0.362623	0.785902	-0.49082	0.385082	-0.11279
0.883333	0.901311	0.312295	1.1123	0.362623	0.635902	-0.42082	0.235082	-0.17279
0.9	0.931311	0.432295	1.31229	0.302623	0.435902	-0.34082	0.165082	-0.18279
0.916667	0.911311	0.592295	1.51229	0.282623	0.235902	-0.34082	0.115082	-0.19279
0.933333	0.871311	0.572295	1.6523	0.172623	0.055902	-0.39082	0.115082	-0.20279
0.95	0.841311	0.592295	1.73229	0.012623	-0.0841	-0.40082	0.155082	-0.16279
0.966667	0.741311	0.632295	1.9323	-0.06738	-0.1841	-0.33082	0.205082	-0.20279
0.983333	0.701311	0.552295	2.0223	-0.05738	-0.2841	-0.29082	0.255082	-0.20279
1	0.711311	0.362295	2.07229	-0.03738	-0.3341	-0.30082	0.315082	-0.10279
1.01667	0.751311	0.202295	2.18229	-0.00738	-0.3341	-0.28082	0.375082	-0.02279
1.03333	0.691311	0.122295	2.1323	0.062623	-0.3441	-0.29082	0.325082	0.247213
1.05	0.591311	0.152295	2.14229	0.152623	-0.3141	-0.29082	0.145082	0.577213
1.06667	0.631311	0.172295	2.1123	0.212623	-0.2441	-0.28082	-0.02492	0.697213
1.08333	0.691311	0.212295	2.12229	0.282623	-0.2241	-0.32082	-0.08492	0.727213
1.1	0.711311	0.312295	2.16229	0.272623	-0.2041	-0.42082	-0.11492	0.767213
1.11667	0.661311	0.592295	2.18229	0.262623	-0.0941	-0.49082	-0.10492	0.757213
1.13333	0.631311	0.682295	2.18229	0.232623	-0.0841	-0.50082	-0.03492	0.687213
1.15	0.621311	0.692295	2.16229	0.202623	-0.0741	-0.51082	0.055082	0.577213
1.16667	0.681311	0.702295	2.1323	0.262623	0.035902	-0.48082	0.155082	0.477213
1.18333	0.721311	0.752295	2.08229	0.382623	0.095902	-0.44082	0.235082	0.397213
1.2	0.741311	0.602295	2.0623	0.512623	0.135902	-0.42082	0.295082	0.317213
1.21667	0.761311	0.432295	1.8323	0.622623	0.165902	-0.50082	0.315082	0.247213
1.23333	0.791311	0.442295	1.6323	0.742623	0.195902	-0.51082	0.295082	0.177213
1.25	0.841311	0.752295	1.54229	0.852623	0.235902	-0.37082	0.245082	0.097213
1.26667	0.861311	0.762295	1.3923	0.782623	0.235902	-0.24082	0.195082	-0.04279
1.28333	0.891311	0.632295	1.32229	0.742623	0.225902	-0.16082	0.115082	-0.14279
1.3	0.921311	0.622295	1.1823	0.712623	0.265902	-0.17082	-0.00492	-0.22279
1.31667	0.931311	0.622295	1.03229	0.672623	0.285902	-0.22082	-0.13492	-0.29279
1.33333	0.941311	0.482295	1.1823	0.652623	0.225902	-0.28082	-0.28492	-0.36279
1.35	0.951311	0.442295	1.3923	0.632623	0.135902	-0.35082	-0.40492	-0.39279
1.36667	0.961311	0.492295	1.3623	0.602623	0.015902	-0.38082	-0.44492	-0.41279
1.38333	0.971311	0.692295	1.3323	0.592623	-0.0441	-0.35082	-0.41492	-0.48279
1.4	0.971311	0.862295	1.27229	0.582623	-0.0841	-0.33082	-0.28492	-0.59279
1.41667	0.941311	0.942295	1.25229	0.612623	-0.0741	-0.42082	-0.12492	-0.64279
1.43333	1.00131	0.762295	1.25229	0.682623	-0.0641	-0.53082	-0.01492	-0.74279
1.45	1.05131	0.322295	1.25229	0.712623	-0.0741	-0.59082	0.075082	-0.80279
1.46667	1.07131	0.162295	1.24229	0.732623	-0.2241	-0.64082	0.145082	-0.79279
1.48333	0.981311	0.222295	1.31229	0.782623	-0.2041	-0.63082	0.215082	-0.72279
1.5	0.941311	0.692295	1.3923	0.882623	-0.1341	-0.62082	0.265082	-0.66279
1.51667	0.941311	1.1323	1.4123	0.962623	-0.1141	-0.52082	0.265082	-0.69279
1.53333	0.881311	1.31229	1.4423	0.822623	-0.0941	-0.38082	0.255082	-0.85279
1.55	0.711311	1.3523	1.26229	0.642623	-0.0541	-0.25082	0.245082	-0.93279
1.56667	0.661311	1.3923	1.1923	0.602623	-0.0741	-0.17082	0.305082	-0.89279
1.58333	0.421311	1.07229	1.1423	0.522623	-0.0941	-0.12082	0.425082	-0.86279
1.6	0.301311	0.342295	1.1423	0.392623	-0.1641	-0.04082	0.555082	-0.75279
1.61667	0.351311	0.422295	1.1723	0.222623	-0.1941	-0.00082	0.655082	-0.68279
1.63333	0.451311	0.422295	1.1723	0.092623	-0.1941	-0.06082	0.725082	-0.61279
1.65	0.471311	0.112295	1.1923	-0.07738	-0.1941	-0.24082	0.705082	-0.52279
1.66667	0.541311	0.092295	1.1623	-0.29738	-0.1741	-0.39082	0.595082	-0.43279
1.68333	0.731311	0.192295	1.0923	-0.39738	-0.1541	-0.48082	0.455082	-0.34279
1.7	0.811311	0.182295	1.1023	-0.47738	-0.1741	-0.47082	0.355082	-0.26279
1.71667	0.841311	0.102295	1.03229	-0.48738	-0.1841	-0.43082	0.435082	-0.20279
1.73333	0.861311	0.142295	1.1423	-0.44738	-0.1641	-0.40082	0.495082	-0.13279
1.75	0.881311	0.062295	1.27229	-0.54738	-0.1541	-0.44082	0.545082	-0.05279
1.76667	0.871311	0.002295	1.31229	-0.55738	-0.1241	-0.51082	0.435082	0.037213
1.78333	0.871311	0.222295	1.27229	-0.49738	-0.1241	-0.58082	0.235082	0.107213
1.8	0.881311	0.262295	1.22229	-0.38738	-0.1141	-0.63082	0.085082	0.207213
1.81667	0.901311	0.162295	1.1823	-0.25738	-0.0141	-0.62082	-0.02492	0.237213
1.83333	0.901311	0.372295	1.1023	0.002623	0.055902	-0.63082	-0.19492	0.227213
1.85	0.871311	0.702295	1.02229	0.202623	0.055902	-0.63082	-0.94492	0.207213
1.86667	0.821311	0.812295	0.982295	0.392623	0.015902	-0.58082	-1.06492	0.197213
1.88333	0.901311	0.892295	0.932295	0.522623	-0.0541	-0.48082	-1.05492	0.177213
1.9	0.971311	0.902295	0.932295	0.652623	-0.2741	-0.29082	-0.97492	0.127213
1.91667	1.04131	0.872295	0.952295	0.742623	-0.6841	-0.18082	-0.86492	0.057213
1.93333	1.06131	0.862295	0.962295	0.802623	-0.7641	-0.11082	-0.82492	-0.02279
1.95	1.15131	0.882295	0.972295	0.812623	-0.8641	-0.10082	-0.83492	-0.00279
1.96667	1.18131	0.912295	1.01229	0.832623	-0.9641	-0.15082	-0.84492	-0.03279
1.98333	1.29131	0.992295	1.04229	0.782623	-1.2441	-0.17082	-0.76492	-0.09279
2	1.34131	0.962295	1.00229	0.712623	-1.9141	-0.18082	-0.72492	-0.02279
2.01667	1.29131	0.792295	0.992295	0.682623	-2.0941	-0.22082	-0.58492	0.047213
2.03333	1.35131	0.642295	1.05229	0.582623	-2.1841	-0.31082	-0.50492	-0.00279
2.05	1.60131	0.532295	1.05229	0.472623	-2.2841	-0.41082	-0.56492	-0.02279
2.06667	1.69131	0.432295	1.06229	0.362623	-2.2741	-0.50082	-0.58492	-0.02279
2.08333	1.55131	0.352295	1.1223	0.332623	-2.1341	-0.57082	-0.64492	0.007213
2.1	1.51131	0.382295	1.21229	0.302623	-1.7741	-0.66082	-0.63492	0.067213
2.11667	1.60131	0.512295	1.1823	0.272623	-1.6141	-0.65082	-0.62492	0.117213
2.13333	1.83131	0.552295	1.1123	0.272623	-1.4541	-0.60082	-0.70492	0.147213
2.15	2.03131	0.582295	1.04229	0.272623	-1.2741	-0.52082	-0.86492	0.247213
2.16667	1.81131	0.612295	1.01229	0.282623	-1.1141	-0.36082	-0.86492	0.327213
2.18333	1.72131	0.622295	1.03229	0.312623	-0.9541	-0.18082	-0.87492	0.367213
2.2	1.62131	0.602295	1.05229	0.322623	-0.8141	-0.14082	-0.88492	0.397213
2.21667	1.49131	0.562295	1.1723	0.322623	-0.7241	-0.15082	-0.70492	0.387213
2.23333	1.45131	0.492295	1.1323	0.342623	-0.6641	-0.20082	-0.57492	0.357213
2.25	1.49131	0.412295	0.962295	0.392623	-0.5441	-0.24082	-0.27492	0.357213
2.26667	1.52131	0.382295	0.802295	0.422623	-0.3941	-0.26082	0.275082	0.357213
2.28333	1.52131	0.372295	0.692295	0.432623	-0.2641	-0.47082	0.555082	0.327213
2.3	1.44131	0.382295	0.562295	0.372623	-0.1441	-0.70082	0.585082	0.307213
2.31667	1.30131	0.402295	0.692295	0.322623	-0.0541	-0.78082	0.585082	0.287213
2.33333	1.19131	0.412295	0.832295	0.362623	0.035902	-0.61082	0.745082	0.287213
2.35	0.861311	0.392295	0.872295	0.512623	0.155902	-0.55082	0.785082	0.257213
2.36667	0.761311	0.412295	0.922295	0.662623	0.205902	-0.61082	0.775082	0.217213
2.38333	0.741311	0.442295	0.942295	1.14262	0.215902	-0.33082	0.685082	0.177213
2.4	0.761311	0.432295	0.942295	1.40262	0.195902	-0.34082	0.615082	0.167213
2.41667	0.791311	0.482295	0.952295	1.44262	0.195902	-0.68082	0.545082	0.137213
2.43333	0.821311	0.682295	1.05229	1.41262	0.095902	-0.81082	0.475082	0.107213
2.45	0.801311	0.892295	1.0923	1.36262	0.015902	-0.81082	0.375082	0.107213
2.46667	0.691311	0.832295	1.0923	1.22262	-0.0041	-0.82082	0.255082	0.057213
2.48333	0.661311	0.672295	0.972295	1.12262	0.065902	-0.84082	0.155082	-0.00279
2.5	0.721311	0.392295	0.932295	1.09262	0.115902	-0.94082	0.065082	-0.10279
2.51667	0.851311	0.312295	1.03229	0.942623	0.315902	-1.02082	0.015082	-0.13279
2.53333	0.831311	0.322295	0.982295	0.502623	0.585902	-1.06082	0.005082	-0.11279
2.55	0.721311	0.352295	0.892295	0.192623	0.695902	-1.03082	-0.00492	0.087213
2.56667	0.671311	0.382295	0.932295	-0.03738	0.815902	-1.01082	-0.07492	0.177213
2.58333	0.701311	0.412295	0.792295	-0.26738	0.905902	-0.67082	-0.15492	0.127213
2.6	0.791311	0.362295	0.362295	-0.44738	0.925902	-0.74082	-0.18492	0.257213
2.61667	0.881311	0.322295	0.222295	-0.54738	0.975902	-1.00082	-0.19492	0.437213
2.63333	0.931311	0.282295	0.082295	-0.63738	1.1659	-1.00082	-0.17492	0.627213
2.65	1.02131	0.262295	-0.1577	-0.76738	1.2859	-1.06082	-0.08492	0.697213
2.66667	1.14131	0.302295	-0.2377	-0.79738	1.3359	-1.06082	0.025082	0.637213
2.68333	1.19131	0.332295	-0.1077	-0.82738	1.3059	-1.02082	0.095082	0.457213
2.7	1.18131	0.312295	-0.0277	-0.89738	1.3259	-1.02082	0.185082	0.417213
2.71667	1.10131	0.312295	-0.0977	-0.93738	1.4159	-1.18082	0.195082	0.517213
2.73333	0.951311	0.312295	-0.0077	-0.90738	1.4259	-1.31082	0.185082	0.597213
2.75	0.921311	0.322295	0.022295	-1.02738	1.4259	-1.47082	0.165082	0.607213
2.76667	0.951311	0.342295	-0.1477	-1.07738	1.4859	-1.32082	0.135082	0.607213
2.78333	0.931311	0.342295	-0.0977	-1.16738	1.4959	-1.35082	0.135082	0.587213
2.8	0.901311	0.312295	-0.1177	-1.22738	1.4559	-1.27082	0.125082	0.507213
2.81667	0.891311	0.312295	-0.2277	-1.24738	1.3559	-0.87082	0.115082	0.457213
2.83333	0.891311	0.302295	-0.1877	-1.19738	1.2259	-0.68082	0.095082	0.417213
2.85	0.911311	0.292295	-0.0977	-1.08738	1.2559	-0.71082	0.085082	0.307213
2.86667	0.941311	0.282295	0.192295	-1.03738	1.6159	-0.72082	0.055082	0.137213
2.88333	0.941311	0.262295	0.532295	-1.05738	1.5859	-0.79082	0.005082	0.067213
2.9	0.931311	0.252295	0.542295	-1.08738	1.5159	-0.87082	-0.07492	-0.14279
2.91667	0.931311	0.252295	0.192295	-1.10738	1.5159	-0.96082	-0.12492	-0.35279
2.93333	0.931311	0.242295	0.002295	-1.10738	1.5659	-1.06082	-0.08492	-0.85279
2.95	0.931311	0.232295	-0.3177	-1.06738	1.7059	-1.13082	-0.04492	-1.25279
2.96667	0.911311	0.242295	-0.5577	-1.07738	2.1159	-1.13082	0.095082	-1.24279
2.98333	0.921311	0.252295	-0.4177	-1.04738	2.2559	-1.08082	0.215082	-1.29279
3	0.921311	0.212295	-0.1577	-0.89738	2.1459	-1.04082	0.325082	-1.34279
3.01667	0.941311	0.182295	-0.0077	-0.82738	2.1159	-0.97082	0.405082	-1.36279
3.03333	0.961311	0.142295	0.362295	-0.73738	2.2059	-0.92082	0.395082	-1.35279
3.05	1.00131	0.112295	0.652295	-0.65738	2.1059	-0.88082	0.345082	-1.20279
3.06667	1.03131	0.312295	0.822295	-0.67738	1.9859	-0.83082	0.295082	-1.11279
3.08333	1.08131	0.362295	0.962295	-0.68738	1.9759	-0.44082	0.215082	-1.04279
3.1	1.10131	0.402295	1.20229	-0.57738	1.9759	-0.24082	0.155082	-1.03279
3.11667	1.13131	0.472295	1.25229	-0.48738	1.9759	-0.17082	0.105082	-1.03279
3.13333	1.10131	0.652295	1.23229	-0.40738	1.9359	-0.16082	0.005082	-1.03279
3.15	1.05131	0.852295	1.29229	-0.34738	1.9259	-0.16082	-0.08492	-0.98279
3.16667	1.01131	0.912295	1.1923	-0.29738	1.9359	-0.18082	-0.19492	-0.94279
3.18333	1.00131	0.642295	1.30229	-0.25738	1.9259	-0.17082	-0.26492	-1.06279
3.2	1.01131	0.372295	1.76229	-0.35738	1.9159	-0.13082	-0.30492	-1.25279
3.21667	1.05131	0.312295	1.8923	-0.38738	1.8759	-0.11082	-0.32492	-1.29279
3.23333	1.09131	0.222295	1.9123	-0.38738	1.8059	-0.13082	-0.33492	-1.23279
3.25	1.14131	-0.0277	1.97229	-0.28738	1.7059	-0.18082	-0.31492	-1.30279
3.26667	1.17131	-0.0677	2.0023	-0.10738	1.5859	-0.24082	-0.29492	-1.30279
3.28333	1.19131	-0.0777	1.8823	-0.05738	1.4759	-0.30082	-0.29492	-1.29279
3.3	1.13131	-0.1277	1.8323	-0.07738	1.3359	-0.36082	-0.28492	-1.27279
3.31667	1.13131	-0.2677	1.95229	-0.10738	1.2159	-0.36082	-0.27492	-1.22279
3.33333	1.19131	-0.4377	1.8523	-0.18738	1.1059	-0.33082	-0.26492	-1.20279
3.35	1.20131	-0.4677	1.9323	-0.29738	1.0659	-0.25082	-0.23492	-1.23279
3.36667	1.22131	-0.3877	2.01229	-0.41738	1.0359	-0.15082	-0.16492	-1.25279
3.38333	1.22131	-0.2777	2.01229	-0.59738	1.0259	-0.13082	-0.12492	-1.26279
3.4	1.22131	-0.1777	1.70229	-0.74738	1.0059	-0.16082	-0.09492	-1.21279
3.41667	1.21131	-0.1577	1.3923	-0.78738	0.985902	-0.15082	0.025082	-1.22279
3.43333	1.20131	-0.1977	1.30229	-0.76738	0.985902	-0.21082	0.245082	-1.43279
3.45	1.35131	-0.1777	1.26229	-0.73738	1.0059	-0.37082	0.315082	-1.51279
3.46667	1.42131	-0.2177	1.4323	-0.70738	0.985902	-0.37082	0.225082	-1.59279
3.48333	1.45131	-0.2277	1.8923	-0.67738	0.955902	-0.27082	0.085082	-1.58279
3.5	1.43131	-0.1677	1.5923	-0.67738	0.975902	-0.23082	0.195082	-1.54279
3.51667	1.45131	0.032295	1.56229	-0.63738	1.0459	-0.23082	0.345082	-1.50279
3.53333	1.67131	0.302295	2.1523	-0.55738	1.1159	-0.24082	0.485082	-1.49279
3.55	1.83131	0.372295	2.1723	-0.50738	1.1859	-0.25082	0.605082	-1.43279
3.56667	1.91131	0.582295	2.22229	-0.52738	1.2059	-0.22082	0.735082	-1.35279
3.58333	2.03131	0.702295	2.2323	-0.47738	1.2359	-0.20082	0.835082	-1.32279
3.6	2.11131	0.842295	2.37229	-0.31738	1.5859	-0.17082	0.825082	-1.28279
3.61667	2.23131	0.932295	2.4423	-0.26738	1.6859	-0.13082	0.835082	-1.09279
3.63333	2.45131	0.922295	2.1723	-0.24738	1.7159	-0.11082	0.915082	-0.94279
3.65	2.49131	0.962295	1.9323	-0.20738	1.6459	-0.06082	0.905082	-0.92279
3.66667	2.48131	0.972295	1.76229	-0.13738	1.6559	0.03918	0.865082	-0.82279
3.68333	2.42131	0.912295	1.6223	-0.13738	1.6659	0.06918	0.835082	-0.78279
3.7	2.44131	0.872295	1.55229	-0.18738	1.6659	0.04918	0.735082	-0.75279
3.71667	2.53131	0.812295	1.48229	-0.21738	1.6459	-0.01082	0.635082	-0.72279
3.73333	2.57131	0.802295	1.3923	-0.22738	1.6159	-0.16082	0.915082	-0.68279
3.75	2.60131	0.812295	1.31229	-0.23738	1.6059	-0.22082	0.995082	-0.68279
3.76667	2.60131	0.732295	1.26229	-0.24738	1.5959	-0.25082	0.835082	-0.66279
3.78333	2.51131	0.632295	1.30229	-0.26738	1.5559	-0.25082	0.765082	-0.62279
3.8	2.18131	0.582295	1.32229	-0.29738	1.5159	-0.25082	0.665082	-0.65279
3.81667	1.79131	0.572295	1.3323	-0.28738	1.5159	-0.25082	0.585082	-0.70279
3.83333	1.85131	0.532295	1.01229	-0.23738	1.5359	-0.29082	0.525082	-0.69279
3.85	1.97131	0.492295	0.692295	-0.15738	1.5759	-0.41082	0.545082	-0.68279
3.86667	1.92131	0.472295	0.862295	-0.10738	1.6459	-0.49082	0.615082	-0.68279
3.88333	1.45131	0.482295	0.912295	-0.06738	1.7859	-0.45082	0.595082	-0.67279
3.9	1.16131	0.482295	0.912295	0.022623	1.9159	-0.35082	0.595082	-0.65279
3.91667	1.01131	0.472295	0.972295	0.112623	2.0059	-0.30082	0.655082	-0.65279
3.93333	0.931311	0.432295	1.01229	0.132623	2.0759	-0.25082	0.855082	-0.69279
3.95	0.811311	0.362295	1.1423	0.122623	2.0859	-0.20082	0.975082	-0.69279
3.96667	0.671311	0.342295	1.27229	0.112623	2.0959	-0.18082	0.885082	-0.67279
3.98333	0.581311	0.342295	1.32229	0.152623	2.1359	-0.24082	0.935082	-0.61279
4	0.391311	0.322295	1.27229	0.212623	2.1459	-0.29082	0.825082	-0.56279
4.01667	0.281311	0.272295	1.27229	0.212623	2.1659	-0.31082	0.785082	-0.52279
4.03333	0.381311	0.242295	1.27229	0.212623	2.1559	-0.30082	1.33508	-0.53279
4.05	0.331311	0.222295	1.28229	0.252623	2.0959	-0.29082	1.52508	-0.55279
4.06667	0.261311	0.192295	1.28229	0.282623	2.0059	-0.27082	1.50508	-0.58279
4.08333	0.231311	0.172295	1.30229	0.312623	1.9159	-0.26082	1.27508	-0.46279
4.1	0.261311	0.162295	1.3423	0.302623	1.8559	-0.32082	1.01508	-0.31279
4.11667	0.491311	0.172295	1.3423	0.222623	1.8259	-0.38082	0.865082	-0.29279
4.13333	0.561311	0.202295	1.29229	0.162623	1.8259	-0.43082	0.885082	-0.30279
4.15	0.591311	0.192295	1.1523	0.152623	1.8359	-0.52082	0.935082	-0.30279
4.16667	0.541311	0.192295	1.06229	0.122623	1.8659	-0.55082	0.945082	-0.29279
4.18333	0.251311	0.202295	1.03229	0.072623	1.9959	-0.50082	0.925082	-0.28279
4.2	0.211311	0.232295	1.03229	0.022623	1.8559	-0.50082	0.835082	-0.27279
4.21667	0.291311	0.232295	1.01229	-0.10738	1.6259	-0.36082	0.715082	-0.25279
4.23333	0.361311	0.202295	1.03229	-0.26738	1.4359	-0.20082	0.605082	-0.21279
4.25	0.431311	0.212295	1.0823	-0.26738	1.4159	-0.13082	0.515082	-0.17279
4.26667	0.391311	0.262295	1.1023	-0.23738	1.4359	-0.12082	0.435082	-0.11279
4.28333	0.331311	0.272295	1.1223	-0.21738	1.0859	-0.13082	0.355082	-0.07279
4.3	0.371311	0.262295	1.1323	-0.18738	0.925902	-0.13082	0.285082	-0.16279
4.31667	0.441311	0.262295	1.20229	-0.14738	0.765902	-0.06082	0.175082	-0.26279
4.33333	0.511311	0.292295	1.23229	-0.06738	0.405902	-0.02082	0.095082	-0.24279
4.35	0.531311	0.322295	1.23229	0.042623	-0.0541	0.00918	0.075082	-0.10279
4.36667	0.571311	0.322295	1.31229	0.002623	-0.2341	0.10918	0.175082	0.047213
4.38333	0.581311	0.322295	1.3523	-0.10738	-0.3241	0.17918	0.175082	0.117213
4.4	0.591311	0.332295	1.28229	-0.14738	-0.3441	0.17918	0.085082	0.177213
4.41667	0.571311	0.302295	1.24229	-0.13738	-0.4041	0.16918	-0.18492	0.197213
4.43333	0.521311	0.222295	1.22229	-0.08738	-0.4041	0.16918	-0.39492	0.187213
4.45	0.491311	0.182295	1.1823	-0.04738	-0.2741	0.13918	-0.44492	0.177213
4.46667	0.521311	0.232295	1.1423	0.022623	-0.0841	0.17918	-0.48492	0.107213
4.48333	0.531311	0.252295	1.1523	0.102623	0.005902	0.21918	-0.37492	-0.02279
4.5	0.571311	0.282295	1.1323	0.152623	-0.1241	0.21918	-0.72492	-0.07279
4.51667	0.581311	0.312295	0.982295	0.182623	-0.2341	0.25918	-0.83492	-0.12279
4.53333	0.611311	0.342295	1.00229	0.172623	-0.5241	0.30918	-0.70492	-0.20279
4.55	0.631311	0.352295	1.06229	0.162623	-0.7141	0.31918	-0.39492	-0.24279
4.56667	0.651311	0.362295	0.952295	0.162623	-0.8141	0.06918	-0.11492	-0.28279
4.58333	0.631311	0.392295	1.03229	0.172623	-0.7841	-0.10082	-0.16492	-0.38279
4.6	0.621311	0.432295	1.3723	0.222623	-0.5841	-0.21082	-0.53492	-0.48279
4.61667	0.601311	0.452295	1.1523	0.252623	-0.2841	-0.30082	-0.78492	-0.42279
4.63333	0.611311	0.452295	0.952295	0.252623	-0.2841	-0.47082	-0.52492	-0.35279
4.65	0.621311	0.462295	1.05229	0.252623	-0.0341	-0.69082	-0.20492	-0.39279
4.66667	0.621311	0.512295	1.01229	0.262623	0.415902	-0.62082	-0.26492	-0.42279
4.68333	0.631311	0.552295	0.902295	0.252623	0.695902	-0.70082	-0.36492	-0.32279
4.7	0.831311	0.622295	0.902295	0.242623	0.595902	-0.85082	-0.41492	-0.22279
4.71667	0.891311	0.662295	0.872295	0.212623	0.275902	-0.93082	-0.35492	-0.06279
4.73333	0.901311	0.592295	0.822295	0.222623	0.285902	-0.93082	-0.25492	0.057213
4.75	0.901311	0.472295	0.812295	0.292623	0.545902	-0.67082	-0.19492	0.037213
4.76667	0.911311	0.362295	0.842295	0.422623	0.745902	-0.56082	-0.20492	0.047213
4.78333	0.941311	0.292295	0.902295	0.872623	0.715902	-0.49082	-0.23492	0.127213
4.8	0.981311	0.262295	0.962295	1.09262	0.685902	-0.33082	-0.26492	0.037213
4.81667	1.01131	0.272295	0.972295	1.49262	0.685902	-0.25082	-0.31492	0.107213
4.83333	0.881311	0.292295	0.992295	1.63262	0.515902	-0.41082	-0.31492	0.227213
4.85	0.801311	0.302295	1.05229	1.72262	0.365902	-0.45082	-0.31492	0.107213
4.86667	0.801311	0.382295	1.0823	1.68262	0.425902	-0.27082	-0.28492	0.077213
4.88333	0.891311	0.592295	1.07229	1.46262	0.495902	-0.09082	-0.25492	0.067213
4.9	0.931311	0.452295	1.05229	1.15262	0.575902	0.06918	-0.18492	0.107213
4.91667	0.931311	0.352295	1.05229	1.24262	0.675902	0.16918	-0.01492	0.277213
4.93333	0.921311	0.472295	1.05229	1.34262	0.875902	0.15918	0.015082	0.397213
4.95	0.921311	0.482295	0.972295	1.29262	1.0859	0.11918	0.005082	0.457213
4.96667	0.901311	0.422295	1.23229	1.21262	1.2759	-0.08082	0.045082	0.357213
4.98333	0.871311	0.172295	1.31229	1.13262	1.6859	-0.44082	0.065082	0.367213
5	0.821311	0.022295	1.3623	1.00262	2.2659	-0.18082	0.075082	0.537213
5.01667	0.741311	-0.0677	1.50229	0.952623	2.6859	0.06918	0.115082	0.627213
5.03333	0.681311	-0.1177	1.55229	0.882623	2.8259	0.39918	0.145082	0.647213
5.05	0.671311	-0.1877	1.3723	0.772623	2.8059	0.42918	0.155082	0.807213
5.06667	0.681311	-0.1877	1.01229	0.682623	2.7359	0.37918	0.175082	1.35721
5.08333	0.661311	-0.1577	0.862295	0.702623	2.6659	0.38918	0.175082	1.51721
5.1	0.691311	-0.1177	0.702295	0.842623	2.6859	0.29918	0.155082	1.56721
5.11667	0.771311	-0.0677	0.562295	0.922623	2.7059	0.25918	0.145082	1.61721
5.13333	0.761311	0.002295	0.372295	0.892623	2.7359	0.19918	0.125082	1.66721
5.15	0.751311	0.012295	0.262295	0.812623	2.6959	0.09918	0.115082	1.63721
5.16667	0.771311	0.012295	0.252295	0.972623	2.6559	0.09918	0.135082	1.58721
5.18333	0.801311	0.062295	0.142295	1.05262	2.6759	0.15918	0.115082	1.49721
5.2	0.821311	0.292295	0.142295	1.20262	2.6259	0.32918	-0.14492	1.39721
5.21667	0.811311	0.292295	0.272295	1.24262	2.5059	0.46918	-0.25492	1.27721
5.23333	0.801311	0.322295	0.232295	1.19262	2.4159	0.48918	-0.30492	1.17721
5.25	0.791311	0.352295	0.142295	1.10262	2.3459	0.49918	-0.31492	1.08721
5.26667	0.801311	0.322295	0.112295	1.07262	2.2159	0.48918	-0.33492	1.00721
5.28333	0.811311	0.332295	0.072295	1.14262	2.0359	0.34918	-0.34492	0.967213
5.3	0.811311	0.392295	0.072295	1.14262	1.9059	0.18918	-0.33492	0.937213
5.31667	0.781311	0.562295	0.122295	1.02262	1.7959	0.16918	-0.32492	0.927213
5.33333	0.701311	0.722295	0.192295	0.712623	1.6359	0.19918	-0.24492	0.907213
5.35	0.661311	0.802295	0.232295	0.552623	1.4059	0.17918	-0.17492	0.897213
5.36667	0.581311	0.782295	0.312295	0.372623	0.875902	0.12918	-0.18492	0.907213
5.38333	0.601311	0.762295	0.382295	0.162623	0.715902	0.05918	-0.17492	0.927213
5.4	0.661311	0.752295	0.442295	-0.04738	0.665902	-0.03082	-0.25492	1.00721
5.41667	0.701311	0.752295	0.452295	-0.23738	0.635902	-0.17082	-0.33492	1.04721
5.43333	0.701311	0.742295	0.452295	-0.24738	0.685902	-0.33082	-0.41492	1.09721
5.45	0.701311	0.742295	0.452295	-0.30738	0.755902	-0.43082	-0.45492	1.13721
5.46667	0.691311	0.722295	0.452295	-0.46738	0.775902	-0.51082	-0.46492	1.15721
5.48333	0.661311	0.702295	0.442295	-0.54738	0.765902	-0.60082	-0.43492	1.15721
5.5	0.621311	0.672295	0.402295	-0.49738	0.775902	-0.74082	-0.40492	1.08721
5.51667	0.581311	0.652295	0.322295	-0.47738	0.775902	-0.81082	-0.40492	0.987213
5.53333	0.561311	0.612295	0.242295	-0.43738	0.805902	-0.82082	-0.42492	0.997213
5.55	0.601311	0.562295	0.182295	-0.34738	0.815902	-0.83082	-0.41492	0.957213
5.56667	0.771311	0.542295	0.122295	-0.32738	0.815902	-0.84082	-0.36492	0.837213
5.58333	0.801311	0.512295	0.072295	-0.36738	0.885902	-0.87082	-0.19492	0.707213
5.6	0.841311	0.472295	0.092295	-0.48738	0.955902	-0.90082	-0.14492	0.607213
5.61667	0.811311	0.422295	0.162295	-0.56738	0.955902	-0.90082	-0.08492	0.537213
5.63333	0.751311	0.402295	0.242295	-0.65738	0.865902	-0.86082	-0.11492	0.267213
5.65	0.741311	0.372295	0.312295	-0.71738	0.805902	-0.73082	-0.10492	0.047213
5.66667	0.641311	0.332295	0.332295	-0.70738	0.815902	-0.62082	-0.04492	-0.01279
5.68333	0.401311	0.342295	0.352295	-0.76738	0.805902	-0.49082	0.045082	-0.01279
5.7	0.091311	0.392295	0.372295	-0.82738	0.785902	-0.35082	0.075082	0.017213
5.71667	0.071311	0.432295	0.392295	-0.80738	0.765902	-0.26082	0.105082	0.037213
5.73333	0.441311	0.492295	0.402295	-0.76738	0.775902	-0.21082	0.155082	0.077213
5.75	0.661311	0.522295	0.402295	-0.73738	0.795902	-0.24082	0.175082	0.137213
5.76667	0.781311	0.562295	0.382295	-0.68738	0.785902	-0.27082	0.155082	0.157213
5.78333	0.911311	0.592295	0.362295	-0.60738	0.775902	-0.29082	0.085082	0.197213
5.8	1.00131	0.642295	0.362295	-0.48738	0.775902	-0.28082	0.005082	0.257213
5.81667	1.06131	0.642295	0.412295	-0.37738	1.0659	-0.30082	-0.09492	0.277213
5.83333	1.08131	0.632295	0.492295	-0.32738	1.1559	-0.34082	-0.16492	0.237213
5.85	1.02131	0.602295	0.552295	-0.31738	1.2159	-0.37082	-0.21492	0.227213
5.86667	0.981311	0.612295	0.572295	-0.30738	1.2859	-0.38082	-0.21492	0.227213
5.88333	0.941311	0.622295	0.582295	-0.25738	1.3259	-0.37082	-0.14492	0.217213
5.9	0.861311	0.632295	0.552295	-0.26738	1.3359	-0.34082	-0.11492	0.227213
5.91667	0.821311	0.642295	0.462295	-0.30738	1.3459	-0.31082	-0.16492	0.257213
5.93333	0.821311	0.642295	0.392295	-0.26738	1.4059	-0.21082	-0.21492	0.287213
5.95	0.821311	0.692295	0.332295	-0.21738	1.4459	-0.13082	-0.25492	0.357213
5.96667	0.801311	0.812295	0.332295	-0.22738	1.4459	-0.05082	-0.29492	0.377213
5.98333	0.741311	0.862295	0.372295	-0.20738	1.4659	-0.06082	-0.37492	0.397213
6	0.691311	0.892295	0.392295	-0.17738	1.4559	-0.29082	-0.42492	0.407213
6.01667	0.671311	1.1723	0.382295	-0.14738	1.4059	-0.29082	-0.49492	0.357213
6.03333	0.681311	1.3923	0.482295	-0.12738	1.3559	-0.32082	-0.54492	0.187213
6.05	0.661311	1.52229	0.582295	-0.12738	1.2959	-0.37082	-0.60492	0.217213
6.06667	0.731311	1.54229	0.612295	-0.17738	1.2559	-0.40082	-0.69492	0.497213
6.08333	0.861311	1.4223	0.672295	-0.32738	1.2459	-0.42082	-0.72492	0.607213
6.1	0.951311	1.1023	0.692295	-0.43738	1.1959	-0.45082	-0.66492	0.577213
6.11667	0.901311	0.952295	0.652295	-0.51738	1.1159	-0.46082	-0.54492	0.547213
6.13333	0.901311	0.912295	0.662295	-0.47738	0.995902	-0.46082	-0.46492	0.447213
6.15	0.911311	0.902295	0.662295	-0.40738	0.945902	-0.47082	-0.11492	0.367213
6.16667	0.841311	1.28229	0.652295	-0.37738	0.925902	-0.52082	0.045082	0.337213
6.18333	0.761311	1.4423	0.692295	-0.36738	0.885902	-0.59082	0.055082	0.337213
6.2	0.711311	1.4023	0.702295	-0.38738	0.905902	-0.60082	0.025082	0.367213
6.21667	0.581311	1.49229	0.642295	-0.42738	0.915902	-0.60082	0.175082	0.347213
6.23333	0.491311	1.57229	0.612295	-0.44738	0.875902	-0.55082	0.315082	0.297213
6.25	0.261311	1.6723	0.602295	-0.47738	0.955902	-0.44082	0.285082	0.037213
6.26667	0.141311	1.8623	0.632295	-0.50738	1.0059	-0.42082	0.295082	-0.13279
6.28333	0.091311	1.71229	0.682295	-0.51738	0.945902	-0.45082	0.555082	-0.01279
6.3	0.011311	0.742295	0.722295	-0.49738	0.925902	-0.51082	0.855082	0.297213
6.31667	-0.10869	0.562295	0.712295	-0.49738	0.915902	-0.55082	1.31508	0.377213
6.33333	-0.23869	0.422295	0.702295	-0.45738	0.855902	-0.61082	1.78508	0.347213
6.35	-0.15869	0.492295	0.702295	-0.34738	0.825902	-0.55082	2.08508	0.417213
6.36667	-0.12869	0.712295	0.682295	-0.24738	0.825902	-0.47082	2.30508	0.447213
6.38333	-0.05869	0.822295	0.672295	-0.08738	0.835902	-0.42082	2.27508	0.317213
6.4	-0.08869	0.922295	0.662295	0.132623	0.875902	-0.32082	2.16508	0.197213
6.41667	-0.06869	0.972295	0.632295	0.172623	0.855902	-0.23082	2.19508	0.057213
6.43333	-0.04869	1.02229	0.612295	0.092623	0.775902	-0.19082	2.31508	-0.08279
6.45	-0.04869	1.07229	0.612295	-0.01738	0.735902	-0.17082	2.43508	-0.15279
6.46667	0.031311	1.04229	0.682295	-0.02738	0.655902	-0.17082	2.41508	-0.20279
6.48333	0.131311	0.982295	0.752295	-0.01738	0.635902	-0.21082	2.27508	-0.26279
6.5	0.311311	0.972295	0.772295	-0.04738	0.685902	-0.28082	1.86508	-0.30279
6.51667	0.491311	1.00229	0.772295	0.012623	0.685902	-0.31082	1.48508	-0.26279
6.53333	0.601311	0.972295	0.802295	0.092623	0.685902	-0.35082	1.16508	-0.27279
6.55	0.481311	0.852295	0.902295	0.192623	0.695902	-0.39082	0.965082	-0.33279
6.56667	0.261311	0.682295	0.992295	0.372623	0.655902	-0.40082	0.355082	-0.34279
6.58333	0.261311	0.652295	1.1023	0.492623	0.635902	-0.47082	-0.10492	-0.27279
6.6	0.271311	0.662295	1.21229	0.462623	0.915902	-0.65082	-0.00492	-0.29279
6.61667	0.351311	0.682295	1.1323	0.312623	1.1659	-0.75082	0.195082	-0.34279
6.63333	0.521311	0.692295	1.1823	0.182623	1.2759	-0.78082	0.205082	-0.40279
6.65	0.701311	0.702295	1.31229	0.082623	1.3459	-0.76082	-0.06492	-0.51279
6.66667	0.761311	0.672295	1.4023	0.062623	1.3559	-0.70082	0.045082	-0.51279
6.68333	0.761311	0.632295	1.1423	0.012623	1.3559	-0.66082	0.105082	-0.60279
6.7	0.851311	0.622295	1.1023	-0.03738	1.5459	-0.59082	0.075082	-0.77279
6.71667	0.901311	0.632295	1.1623	-0.06738	1.7659	-0.54082	0.055082	-1.02279
6.73333	0.901311	0.672295	1.1223	-0.03738	1.8059	-0.48082	0.045082	-1.19279
6.75	1.02131	0.672295	1.1123	0.032623	1.7259	-0.38082	0.195082	-1.44279
6.76667	1.13131	0.672295	1.0923	0.162623	1.7859	-0.28082	0.455082	-1.87279
6.78333	1.26131	0.672295	1.1023	0.212623	2.0259	-0.25082	0.485082	-2.19279
6.8	1.40131	0.652295	1.01229	0.212623	2.2059	-0.22082	0.495082	-2.32279
6.81667	1.61131	0.692295	0.822295	0.172623	2.3759	-0.28082	0.565082	-2.46279
6.83333	1.72131	0.732295	0.762295	0.152623	2.4559	-0.58082	0.065082	-2.52279
6.85	1.71131	0.802295	0.602295	0.142623	2.2859	-1.21082	-0.08492	-2.46279
6.86667	1.70131	0.882295	0.292295	-0.20738	2.1659	-1.53082	0.095082	-2.40279
6.88333	1.82131	0.862295	0.052295	-0.49738	1.8659	-1.68082	0.195082	-2.26279
6.9	1.91131	0.852295	0.052295	-0.50738	1.5859	-1.83082	0.165082	-2.17279
6.91667	1.95131	0.822295	0.132295	-0.45738	1.6259	-2.00082	0.135082	-2.10279
6.93333	1.97131	0.752295	0.102295	-0.00738	1.5259	-2.04082	0.135082	-2.07279
6.95	1.92131	0.742295	0.152295	0.132623	1.3259	-1.93082	0.205082	-1.90279
6.96667	1.91131	0.782295	0.282295	0.152623	1.0959	-1.90082	0.115082	-1.34279
6.98333	1.68131	0.772295	0.252295	0.412623	0.875902	-2.00082	0.005082	-0.98279
7	1.57131	0.682295	0.252295	0.642623	0.905902	-2.09082	0.015082	-0.96279
7.01667	1.57131	0.582295	0.282295	0.732623	0.935902	-2.13082	-0.13492	-1.08279
7.03333	1.57131	0.612295	0.332295	0.792623	0.865902	-2.19082	-0.13492	-1.15279
7.05	1.53131	0.632295	0.362295	0.772623	0.935902	-2.27082	-0.42492	-1.00279
7.06667	1.43131	0.652295	0.332295	0.742623	1.1359	-2.44082	-0.78492	-0.97279
7.08333	1.28131	0.632295	0.222295	0.782623	1.1159	-2.79082	-0.90492	-0.90279
7.1	1.02131	0.522295	0.192295	0.772623	1.0059	-3.10082	-0.96492	-0.66279
7.11667	0.801311	0.422295	0.192295	0.742623	0.985902	-3.29082	-1.00492	-0.61279
7.13333	0.641311	0.362295	0.202295	0.702623	0.865902	-3.32082	-1.04492	-0.54279
7.15	0.631311	0.382295	0.212295	0.572623	0.885902	-3.26082	-1.09492	-0.36279
7.16667	0.691311	0.432295	0.242295	0.212623	0.985902	-3.15082	-1.06492	-0.15279
7.18333	0.751311	0.452295	0.272295	0.222623	1.2759	-3.03082	-1.08492	-0.05279
7.2	1.02131	0.452295	0.322295	0.312623	2.0659	-2.83082	-1.09492	0.017213
7.21667	1.12131	0.442295	0.312295	0.392623	2.6859	-2.39082	-1.09492	-0.14279
7.23333	1.11131	0.402295	0.312295	0.532623	2.8359	-2.10082	-1.05492	-0.13279
7.25	1.03131	0.362295	0.322295	0.602623	2.5959	-1.99082	-0.99492	-0.01279
7.26667	0.961311	0.322295	0.332295	0.682623	2.4359	-2.04082	-0.96492	0.317213
7.28333	0.921311	0.302295	0.352295	0.802623	2.2359	-2.24082	-0.96492	0.137213
7.3	0.841311	0.322295	0.372295	0.972623	2.1559	-2.06082	-0.91492	-0.27279
7.31667	0.741311	0.362295	0.332295	1.12262	2.1159	-1.70082	-0.87492	-0.37279
7.33333	0.641311	0.382295	0.342295	1.21262	1.9959	-1.61082	-0.79492	-0.64279
7.35	0.541311	0.342295	0.322295	1.29262	1.8059	-1.50082	-0.45492	-0.80279
7.36667	0.391311	0.342295	0.292295	1.53262	1.6359	-1.31082	-0.28492	-0.76279
7.38333	0.231311	0.362295	0.352295	1.70262	1.5459	-1.26082	-0.16492	-0.91279
7.4	0.241311	0.362295	0.392295	1.79262	1.6259	-1.45082	-0.09492	-0.88279
7.41667	0.291311	0.402295	0.402295	1.90262	1.6159	-1.40082	0.025082	-0.60279
7.43333	0.331311	0.442295	0.422295	1.90262	1.5859	-1.14082	0.145082	-0.55279
7.45	0.491311	0.462295	0.462295	1.65262	1.2759	-0.89082	0.245082	-0.46279
7.46667	0.501311	0.432295	0.502295	1.54262	1.1659	-0.71082	0.335082	-0.17279
7.48333	0.471311	0.402295	0.472295	1.47262	1.1059	-0.61082	0.355082	0.047213
7.5	0.421311	0.362295	0.452295	1.45262	1.1259	-0.56082	0.345082	0.087213
7.51667	0.411311	0.372295	0.442295	1.24262	1.1659	-0.49082	0.275082	0.187213
7.53333	0.361311	0.372295	0.512295	1.17262	1.1759	-0.49082	0.115082	0.287213
7.55	0.321311	0.372295	0.532295	1.24262	1.1559	-0.37082	-0.10492	0.377213
7.56667	0.351311	0.402295	0.452295	1.41262	1.1559	-0.06082	-0.17492	0.617213
7.58333	0.391311	0.502295	0.432295	1.21262	1.2459	0.03918	-0.20492	0.737213
7.6	0.381311	0.532295	0.442295	0.742623	1.3259	0.00918	-0.34492	0.777213
7.61667	0.381311	0.602295	0.422295	0.602623	1.3859	-0.05082	-0.40492	0.997213
7.63333	0.401311	0.842295	0.382295	0.452623	1.3959	-0.10082	-0.39492	1.09721
7.65	0.421311	1.1223	0.272295	0.012623	1.3059	-0.20082	-0.39492	0.957213
7.66667	0.401311	1.1723	0.162295	-0.19738	1.1659	-0.26082	-0.43492	0.857213
7.68333	0.381311	1.1323	0.202295	-0.38738	1.0759	-0.35082	-0.42492	0.817213
7.7	0.351311	1.1023	0.452295	-0.57738	1.0259	-0.54082	-0.35492	0.787213
7.71667	0.361311	0.862295	0.602295	-0.69738	0.955902	-0.71082	-0.36492	0.667213
7.73333	0.431311	0.862295	0.642295	-0.74738	0.895902	-0.89082	-0.38492	0.547213
7.75	0.451311	0.922295	0.612295	-0.71738	0.885902	-1.02082	-0.38492	0.517213
7.76667	0.571311	1.24229	0.482295	-0.65738	0.875902	-1.10082	-0.40492	0.567213
7.78333	0.621311	1.27229	0.412295	-0.57738	0.875902	-1.10082	-0.37492	0.577213
7.8	0.631311	1.1523	0.392295	-0.50738	0.885902	-1.06082	-0.31492	0.737213
7.81667	0.631311	1.1423	0.472295	-0.45738	0.905902	-1.01082	-0.26492	0.687213
7.83333	0.601311	1.26229	0.562295	-0.45738	0.915902	-0.95082	-0.20492	0.537213
7.85	0.501311	1.3623	0.552295	-0.44738	0.845902	-0.87082	-0.02492	0.567213
7.86667	0.541311	1.3523	0.632295	-0.40738	0.795902	-0.82082	0.155082	0.557213
7.88333	0.601311	0.912295	0.712295	-0.39738	0.805902	-0.78082	0.245082	0.537213
7.9	0.721311	0.682295	0.702295	-0.35738	0.815902	-0.78082	0.155082	0.527213
7.91667	0.701311	0.782295	0.642295	-0.30738	0.705902	-0.75082	0.175082	0.517213
7.93333	0.681311	0.802295	0.522295	-0.25738	0.695902	-0.64082	0.165082	0.487213
7.95	0.521311	0.482295	0.412295	-0.21738	0.735902	-0.54082	0.165082	0.477213
7.96667	0.391311	0.372295	0.382295	-0.16738	0.805902	-0.46082	0.185082	0.467213
7.98333	0.361311	0.342295	0.482295	-0.14738	0.805902	-0.43082	0.285082	0.467213
8	0.181311	0.542295	0.482295	-0.10738	0.815902	-0.41082	0.335082	0.447213
8.01667	-0.16869	0.782295	0.582295	-0.06738	0.985902	-0.42082	0.365082	0.437213
8.03333	-0.50869	1.00229	0.702295	-0.03738	1.0759	-0.50082	0.375082	0.417213
8.05	-0.74869	1.31229	0.642295	-0.01738	0.905902	-0.72082	0.315082	0.387213
8.06667	-0.84869	1.5923	0.542295	0.002623	0.845902	-0.82082	0.295082	0.367213
8.08333	-0.75869	1.71229	0.492295	0.002623	1.3459	-0.93082	0.265082	0.437213
8.1	-0.59869	1.72229	0.592295	0.032623	1.4959	-1.00082	0.195082	0.457213
8.11667	-0.57869	1.75229	0.442295	0.002623	1.4659	-1.02082	0.175082	0.437213
8.13333	-0.56869	1.81229	0.312295	-0.02738	1.3459	-0.98082	0.135082	0.397213
8.15	-0.49869	1.8523	0.362295	-0.01738	1.3459	-0.90082	0.085082	0.327213
8.16667	-0.38869	1.8523	0.302295	0.042623	1.4659	-0.78082	0.045082	0.267213
8.18333	-0.06869	1.71229	0.182295	-0.01738	1.5559	-0.72082	0.005082	0.217213
8.2	0.501311	1.6923	0.112295	-0.20738	1.7959	-0.77082	-0.19492	0.177213
8.21667	0.711311	1.6823	0.002295	-0.24738	2.1359	-0.94082	-0.12492	0.167213
8.23333	0.751311	1.70229	-0.0977	-0.30738	2.5959	-1.25082	0.085082	0.207213
8.25	0.751311	1.8923	0.042295	-0.34738	2.6259	-1.42082	0.065082	0.257213
8.26667	0.861311	1.79229	0.062295	-0.29738	2.6259	-1.42082	0.015082	0.307213
8.28333	0.911311	1.6423	-0.0277	-0.27738	2.6059	-1.41082	-0.02492	0.337213
8.3	0.891311	1.6023	0.012295	-0.28738	2.6359	-1.62082	-0.14492	0.367213
8.31667	0.921311	1.6123	0.042295	-0.24738	2.7959	-1.78082	-0.21492	0.377213
8.33333	0.911311	1.5923	0.232295	-0.11738	2.8359	-1.76082	-0.21492	0.397213
8.35	0.881311	1.54229	0.312295	-0.08738	2.6459	-1.63082	0.145082	0.397213
8.36667	0.711311	1.50229	0.582295	-0.11738	2.5759	-1.49082	0.225082	0.367213
8.38333	0.401311	1.45229	0.832295	0.022623	2.6159	-1.47082	0.195082	0.377213
8.4	0.501311	1.3923	0.752295	0.042623	2.7459	-1.37082	0.105082	0.397213
8.41667	0.521311	1.3423	0.102295	0.062623	2.6959	-1.40082	0.095082	0.387213
8.43333	0.461311	1.31229	-0.0277	0.192623	2.4659	-1.49082	0.165082	0.397213
8.45	0.451311	1.25229	0.132295	0.422623	1.8759	-1.31082	0.175082	0.377213
8.46667	0.561311	1.1723	0.252295	0.692623	1.6759	-1.06082	0.175082	0.377213
8.48333	0.571311	1.1123	0.342295	0.692623	1.2259	-0.88082	0.155082	0.407213
8.5	0.481311	1.1023	0.362295	0.662623	1.0159	-0.80082	0.075082	0.427213
8.51667	0.381311	1.1523	0.432295	0.712623	0.975902	-0.78082	-0.02492	0.407213
8.53333	0.351311	1.1323	0.522295	0.892623	0.995902	-0.76082	-0.06492	0.357213
8.55	0.361311	1.1123	0.592295	0.972623	1.0759	-0.78082	-0.12492	0.317213
8.56667	0.371311	1.0823	0.542295	0.962623	1.1859	-0.85082	-0.11492	0.317213
8.58333	0.361311	1.03229	0.542295	0.972623	1.4259	-0.81082	-0.04492	0.347213
8.6	0.351311	0.982295	0.592295	0.982623	1.7559	-0.68082	-0.01492	0.357213
8.61667	0.341311	0.932295	0.542295	0.952623	1.8159	-0.48082	-0.01492	0.337213
8.63333	0.321311	0.852295	0.812295	0.752623	1.8259	-0.23082	0.175082	0.297213
8.65	0.311311	0.772295	0.852295	0.502623	1.8359	0.11918	0.315082	0.277213
8.66667	0.331311	0.692295	0.552295	0.542623	1.8059	0.26918	0.305082	0.207213
8.68333	0.361311	0.682295	0.492295	0.442623	1.7659	0.51918	0.225082	0.097213
8.7	0.371311	0.642295	0.442295	0.202623	1.7559	0.76918	0.275082	0.097213
8.71667	0.361311	0.662295	0.442295	0.322623	1.7559	0.80918	0.345082	-0.03279
8.73333	0.331311	0.792295	0.382295	0.552623	1.8359	0.89918	0.265082	-0.23279
8.75	0.391311	0.752295	0.272295	0.652623	1.8759	0.99918	0.295082	-0.16279
8.76667	0.511311	0.782295	0.232295	0.722623	1.8959	1.00918	0.155082	-0.21279
8.78333	0.581311	1.00229	0.222295	0.702623	1.9359	1.00918	0.135082	-0.39279
8.8	0.571311	0.972295	0.152295	0.612623	1.9659	0.99918	0.205082	-0.51279
8.81667	0.521311	1.03229	-0.0377	0.572623	1.9959	0.96918	0.235082	-0.75279
8.83333	0.471311	1.05229	-0.1877	0.572623	2.0259	1.02918	0.235082	-1.05279
8.85	0.381311	0.982295	-0.4077	0.522623	2.0559	1.13918	0.205082	-1.09279
8.86667	0.371311	1.0923	-0.7277	0.522623	2.1159	1.03918	0.155082	-0.99279
8.88333	0.451311	1.0823	-0.9277	0.462623	2.2159	0.96918	0.235082	-1.02279
8.9	0.521311	1.1023	-0.9077	0.402623	2.4159	1.06918	0.185082	-1.14279
8.91667	0.581311	1.27229	-0.8077	0.412623	2.5259	1.06918	0.075082	-1.05279
8.93333	0.611311	1.6423	-0.7177	0.392623	2.5159	1.00918	-0.11492	-0.78279
8.95	0.581311	1.4123	-0.6577	0.332623	2.4659	0.94918	-0.29492	-0.67279
8.96667	0.621311	0.732295	-0.5877	0.282623	2.4059	0.85918	-0.60492	-0.55279
8.98333	0.571311	0.452295	-0.5577	0.302623	2.3759	0.50918	-0.46492	-0.47279
9	0.531311	0.482295	-0.2577	0.322623	2.3959	0.34918	-0.24492	-0.41279
9.01667	0.601311	0.562295	0.162295	0.352623	2.3859	0.38918	-0.12492	-0.35279
9.03333	1.03131	0.742295	0.042295	0.372623	2.4059	0.51918	-0.24492	-0.29279
9.05	1.00131	0.872295	-0.4177	0.392623	2.4659	0.24918	-0.39492	-0.25279
9.06667	1.04131	1.00229	-0.6077	0.342623	2.6259	0.01918	-0.62492	-0.16279
9.08333	1.04131	1.1923	-0.5377	0.342623	2.8359	-0.22082	-0.75492	-0.04279
9.1	1.09131	1.1323	-0.5077	0.242623	2.4859	-0.43082	-0.72492	-0.02279
9.11667	1.21131	0.602295	-0.4977	0.282623	1.4159	-0.95082	-0.39492	-0.09279
9.13333	1.10131	0.612295	-0.3677	0.082623	1.2159	-1.33082	-0.04492	-0.22279
9.15	0.991311	0.942295	0.112295	0.012623	1.3359	-1.64082	0.045082	-0.20279
9.16667	0.761311	0.952295	0.342295	0.132623	1.4459	-1.84082	-0.00492	-0.17279
9.18333	0.821311	0.842295	0.132295	0.292623	1.1059	-1.94082	-0.02492	-0.15279
9.2	0.911311	0.802295	0.032295	0.412623	0.765902	-1.95082	-0.01492	-0.25279
9.21667	0.881311	0.882295	-0.0477	0.482623	0.555902	-1.90082	0.085082	-0.28279
9.23333	0.771311	1.25229	-0.0877	0.512623	0.565902	-1.90082	0.225082	-0.03279
9.25	0.641311	1.4223	0.082295	0.662623	0.615902	-1.97082	0.295082	0.377213
9.26667	0.511311	1.3323	0.112295	0.552623	0.635902	-1.91082	0.355082	0.457213
9.28333	0.731311	0.992295	0.052295	0.432623	0.705902	-1.69082	0.305082	0.417213
9.3	0.761311	0.952295	0.012295	0.332623	0.775902	-1.61082	0.185082	0.287213
9.31667	0.761311	1.00229	0.112295	0.272623	1.0459	-1.55082	0.175082	-0.06279
9.33333	0.691311	0.792295	0.082295	0.162623	0.925902	-1.25082	0.195082	-0.54279
9.35	0.311311	0.572295	0.322295	0.072623	0.805902	-1.18082	0.175082	-0.67279
9.36667	0.121311	0.472295	0.732295	0.182623	0.885902	-1.50082	0.185082	-0.67279
9.38333	0.161311	0.452295	1.1223	0.252623	1.1259	-1.04082	0.315082	-0.84279
9.4	0.351311	0.442295	1.4023	0.042623	1.2959	-0.50082	0.285082	-1.34279
9.41667	0.411311	0.562295	1.57229	-0.33738	1.4559	-0.27082	0.255082	-1.41279
9.43333	0.511311	0.882295	1.49229	-0.18738	1.5359	-0.25082	0.185082	-1.19279
9.45	0.581311	0.982295	0.912295	-0.16738	1.7459	-0.36082	0.055082	-0.81279
9.46667	0.581311	1.04229	0.802295	-0.14738	2.3459	-0.42082	-0.11492	-0.53279
9.48333	0.561311	1.1223	0.682295	-0.12738	2.0859	-0.41082	-0.24492	-0.18279
9.5	0.561311	1.03229	0.712295	-0.06738	1.7959	-0.72082	-0.38492	-0.11279
9.51667	0.531311	0.832295	0.722295	0.212623	1.8159	-0.93082	-0.49492	-0.09279
9.53333	0.571311	0.712295	0.562295	0.422623	1.6659	-1.00082	-0.51492	-0.17279
9.55	0.531311	0.702295	0.622295	0.382623	1.6059	-1.06082	-0.52492	-0.16279
9.56667	0.571311	0.932295	0.792295	0.372623	1.3459	-1.18082	-0.53492	-0.05279
9.58333	0.711311	1.02229	0.812295	0.692623	0.885902	-1.27082	-0.51492	-0.01279
9.6	0.841311	0.972295	1.1623	0.772623	0.765902	-1.25082	-0.48492	-0.02279
9.61667	0.811311	0.952295	1.6023	0.502623	0.765902	-1.19082	-0.41492	-0.12279
9.63333	0.481311	0.882295	1.6023	0.102623	1.0159	-1.17082	-0.31492	-0.31279
9.65	0.431311	0.672295	1.25229	-0.02738	1.8259	-1.22082	-0.33492	-0.40279
9.66667	0.691311	0.762295	1.24229	0.062623	1.9459	-0.99082	-0.46492	-0.50279
9.68333	0.921311	0.752295	1.01229	0.142623	1.6759	-0.92082	-0.32492	-0.52279
9.7	1.08131	0.642295	0.802295	0.082623	1.6059	-1.04082	-0.12492	-0.39279
9.71667	1.19131	0.362295	0.772295	-0.16738	1.5259	-1.08082	0.295082	-0.31279
9.73333	1.25131	-0.0277	0.752295	-0.26738	1.3559	-1.13082	0.485082	-0.25279
9.75	1.31131	0.182295	0.762295	-0.26738	1.3359	-1.18082	0.465082	-0.15279
9.76667	1.39131	0.162295	0.852295	-0.19738	1.4859	-1.02082	0.405082	-0.13279
9.78333	1.49131	0.102295	0.822295	-0.02738	1.5959	-1.00082	0.465082	-0.10279
9.8	1.53131	-0.0077	0.742295	0.302623	1.7659	-1.13082	0.555082	-0.03279
9.81667	1.56131	0.032295	0.722295	0.182623	1.7959	-1.48082	0.575082	0.037213
9.83333	1.69131	0.272295	0.882295	-0.28738	1.6259	-1.83082	0.595082	0.097213
9.85	1.82131	0.222295	1.1123	-0.23738	1.7359	-1.77082	0.555082	0.167213
9.86667	1.89131	0.152295	1.26229	-0.19738	1.8759	-1.67082	0.345082	0.207213
9.88333	2.00131	0.102295	1.04229	-0.44738	1.8059	-1.58082	0.105082	0.167213
9.9	1.97131	0.122295	1.07229	-0.61738	2.0059	-1.39082	0.195082	0.247213
9.91667	1.99131	0.162295	1.3423	-0.51738	2.2559	-1.45082	0.245082	0.287213
9.93333	2.13131	0.112295	1.4323	-0.30738	2.3759	-1.47082	0.215082	0.277213
9.95	2.17131	-0.0377	1.30229	-0.36738	2.4859	-1.48082	0.145082	0.367213
9.96667	2.28131	0.242295	0.922295	-0.36738	2.5359	-1.61082	0.055082	0.407213
9.98333	2.45131	0.942295	0.602295	-0.26738	2.3959	-1.59082	0.025082	0.417213
10	2.64131	1.02229	0.432295	-0.19738	2.1659	-1.61082	0.065082	0.367213
10.0167	2.58131	0.552295	0.462295	-0.18738	1.9159	-1.67082	0.095082	0.337213
10.0333	2.40131	0.092295	0.572295	-0.27738	1.8559	-1.67082	-0.09492	0.477213
10.05	2.20131	-0.1277	0.592295	-0.35738	1.8159	-1.53082	-0.18492	0.527213
10.0667	1.65131	0.092295	0.552295	-0.28738	1.8559	-1.45082	0.035082	0.487213
10.0833	1.50131	0.212295	0.632295	-0.28738	1.9759	-1.37082	0.355082	0.577213
10.1	1.38131	0.172295	0.762295	-0.41738	1.9559	-1.29082	0.785082	0.457213
10.1167	1.36131	0.242295	0.712295	-0.39738	1.3659	-1.26082	1.15508	0.047213
10.1333	1.43131	0.392295	0.562295	-0.26738	1.3559	-1.16082	0.885082	-0.05279
10.15	1.29131	0.642295	0.552295	0.052623	1.8059	-1.07082	0.655082	-0.14279
10.1667	1.15131	0.562295	0.522295	0.332623	1.9859	-1.01082	0.525082	-0.30279
10.1833	1.04131	0.292295	0.812295	0.282623	2.0759	-0.89082	0.495082	-0.19279
10.2	0.951311	0.032295	1.32229	0.362623	2.0659	-0.73082	0.535082	-0.02279
10.2167	0.851311	-0.3577	1.4023	0.502623	1.7259	-0.74082	0.595082	0.047213
10.2333	0.781311	-0.4377	0.752295	0.462623	1.3259	-0.78082	0.665082	-0.08279
10.25	0.691311	-0.5177	0.722295	0.452623	0.975902	-0.97082	0.725082	-0.08279
10.2667	0.631311	-0.6077	0.792295	0.462623	0.635902	-0.88082	0.735082	0.057213
10.2833	0.631311	-0.7277	0.922295	0.372623	0.465902	-0.70082	0.705082	-0.03279
10.3	0.661311	-0.7677	0.972295	0.142623	0.425902	-0.55082	0.775082	-0.08279
10.3167	0.881311	-0.6477	1.0823	0.192623	0.535902	-0.72082	0.865082	0.057213
10.3333	1.11131	-0.5077	1.28229	0.332623	0.725902	-0.74082	0.935082	-0.27279
10.35	1.18131	-0.3977	1.4423	0.462623	1.0259	-0.56082	1.04508	-0.40279
10.3667	1.18131	-0.3477	1.4323	0.242623	1.0859	-0.59082	1.19508	-0.24279
10.3833	1.10131	-0.0377	1.4123	0.112623	1.1359	-0.61082	1.12508	-0.33279
10.4	1.09131	0.412295	1.53229	0.042623	1.2059	-0.56082	1.12508	-0.42279
10.4167	1.13131	0.812295	1.6723	0.012623	1.1459	-0.51082	1.26508	-0.26279
10.4333	1.08131	0.852295	1.6723	0.172623	1.0559	-0.43082	1.32508	-0.24279
10.45	0.981311	0.832295	1.4423	0.122623	0.975902	-0.27082	1.41508	-0.23279
10.4667	0.991311	0.792295	1.3723	-0.11738	0.945902	-0.21082	1.47508	-0.22279
10.4833	1.08131	0.762295	1.4023	-0.23738	0.905902	-0.16082	1.36508	-0.20279
10.5	1.17131	0.762295	1.46229	-0.22738	0.755902	-0.07082	1.36508	-0.16279
10.5167	1.22131	0.992295	1.5923	0.422623	0.665902	0.04918	1.21508	-0.02279
10.5333	1.41131	1.06229	1.57229	0.452623	0.635902	0.05918	0.985082	0.017213
10.55	1.61131	0.812295	1.45229	0.422623	0.675902	0.01918	0.775082	-0.02279
10.5667	1.55131	0.572295	1.4223	0.552623	0.715902	0.13918	0.655082	0.037213
10.5833	1.48131	0.542295	1.3623	0.692623	0.725902	0.22918	0.555082	0.237213
10.6	1.41131	0.512295	1.71229	0.712623	0.735902	0.17918	0.535082	0.377213
10.6167	1.37131	0.542295	2.01229	0.632623	0.765902	-0.02082	0.475082	0.427213
10.6333	1.40131	0.492295	2.1323	0.572623	0.775902	-0.22082	0.375082	0.437213
10.65	1.38131	0.212295	1.98229	0.482623	0.745902	-0.26082	0.235082	0.627213
10.6667	1.26131	0.282295	1.52229	0.432623	0.755902	-0.17082	0.115082	0.897213
10.6833	0.961311	0.382295	1.4223	0.462623	0.845902	-0.18082	0.045082	0.727213
10.7	0.941311	0.392295	1.3823	0.402623	0.905902	-0.22082	-0.09492	0.577213
10.7167	1.06131	0.372295	1.24229	0.202623	1.0259	-0.16082	-0.29492	0.517213
10.7333	1.14131	0.422295	1.01229	0.022623	1.1459	0.01918	-0.42492	0.487213
10.75	1.24131	0.542295	1.05229	-0.08738	1.2759	0.06918	-0.43492	0.377213
10.7667	1.22131	0.572295	1.3423	-0.21738	1.1159	0.15918	-0.36492	0.117213
10.7833	1.08131	0.542295	1.24229	-0.33738	0.955902	0.44918	-0.13492	-0.02279
10.8	1.07131	0.632295	1.20229	-0.35738	0.935902	0.52918	0.305082	-0.12279
10.8167	1.09131	1.1923	1.24229	-0.39738	0.855902	0.58918	0.625082	-0.18279
10.8333	1.11131	1.27229	1.20229	-0.24738	0.945902	0.61918	1.16508	-0.16279
10.85	1.12131	1.0823	0.922295	-0.13738	1.1359	0.64918	1.23508	0.047213
10.8667	1.08131	1.05229	0.392295	-0.26738	1.2259	0.63918	0.745082	0.097213
10.8833	1.11131	0.952295	0.282295	-0.54738	1.3259	0.47918	0.745082	0.447213
10.9	1.06131	0.912295	0.232295	-0.52738	1.5759	0.19918	0.905082	0.637213
10.9167	0.981311	0.882295	0.022295	-0.49738	1.6459	0.10918	1.14508	0.347213
10.9333	0.881311	0.932295	-0.0477	-0.67738	1.6159	0.09918	1.49508	0.217213
10.95	0.831311	1.0823	0.182295	-0.76738	1.4259	0.23918	1.45508	0.067213
10.9667	1.05131	1.0923	0.362295	-0.67738	1.1259	0.70918	1.40508	0.017213
10.9833	1.08131	1.24229	-0.1277	-0.18738	0.975902	0.82918	1.51508	-0.10279
11	1.03131	1.1823	-0.2277	-0.43738	0.995902	0.73918	1.62508	-0.34279
11.0167	0.981311	0.892295	-0.1177	-0.71738	1.1259	0.53918	1.67508	-0.50279
11.0333	0.851311	0.752295	-0.4277	-0.43738	1.1559	0.51918	1.49508	-0.56279
11.05	0.421311	0.342295	-0.5577	-0.14738	1.1659	0.49918	1.09508	-0.55279
11.0667	0.071311	-0.0977	-0.1477	0.042623	1.0859	0.57918	0.985082	-0.75279
11.0833	-0.09869	-0.2877	0.352295	0.042623	0.905902	0.62918	1.27508	-0.67279
11.1	-0.26869	0.042295	0.742295	0.082623	0.925902	0.52918	1.40508	-0.50279
11.1167	-0.37869	0.132295	0.872295	0.032623	0.955902	0.45918	1.43508	-0.71279
11.1333	-0.38869	0.462295	0.872295	-0.24738	0.955902	0.51918	1.67508	-0.97279
11.15	-0.43869	0.802295	0.802295	-0.38738	0.985902	0.60918	1.73508	-0.83279
11.1667	-0.46869	0.982295	0.522295	-0.27738	1.0259	0.80918	1.68508	-0.49279
11.1833	-0.45869	0.922295	0.052295	-0.16738	0.975902	0.99918	1.44508	-0.25279
11.2	-0.77869	0.582295	-0.3277	0.142623	0.895902	1.10918	1.48508	-0.07279
11.2167	-0.82869	0.322295	-0.5677	0.602623	0.865902	1.00918	1.63508	-0.10279
11.2333	-0.78869	0.262295	-0.5977	0.852623	0.745902	0.74918	1.72508	0.017213
11.25	-0.59869	0.272295	-0.5477	0.872623	0.645902	0.43918	1.70508	0.017213
11.2667	-0.37869	0.362295	-0.4577	0.672623	0.675902	0.11918	1.72508	-0.06279
11.2833	-0.24869	0.352295	-0.4077	0.482623	0.755902	0.01918	2.03508	-0.05279
11.3	-0.21869	0.312295	-0.3177	0.472623	0.755902	0.00918	2.42508	-0.04279
11.3167	-0.25869	0.572295	-0.1277	0.562623	0.695902	0.01918	2.68508	-0.04279
11.3333	-0.28869	0.712295	-0.0477	0.542623	0.685902	0.09918	2.72508	0.317213
11.35	-0.25869	0.702295	-0.1077	0.332623	0.735902	0.11918	2.79508	0.437213
11.3667	-0.26869	0.472295	-0.7177	0.412623	0.755902	0.02918	2.53508	0.407213
11.3833	-0.17869	0.222295	-1.0877	0.712623	0.765902	-0.05082	2.27508	0.307213
11.4	0.071311	0.112295	-0.9777	0.792623	0.725902	-0.13082	2.39508	0.267213
11.4167	0.081311	0.122295	-0.8477	0.832623	0.725902	-0.36082	2.47508	0.247213
11.4333	0.181311	0.122295	-0.7077	0.762623	0.785902	-0.56082	2.60508	0.247213
11.45	0.321311	0.102295	-0.6877	0.652623	0.825902	-0.70082	2.49508	0.257213
11.4667	0.161311	0.162295	-0.7477	0.612623	0.785902	-0.76082	2.57508	0.247213
11.4833	0.021311	0.132295	-0.6977	0.622623	0.795902	-0.80082	2.60508	0.257213
11.5	0.051311	0.062295	-0.3577	0.382623	0.695902	-0.87082	2.43508	0.237213
11.5167	-0.04869	-0.4077	0.052295	0.282623	0.605902	-0.99082	2.21508	0.397213
11.5333	-0.13869	-0.8277	0.252295	0.192623	0.755902	-1.06082	2.14508	0.507213
11.55	-0.08869	-0.8677	0.302295	-0.07738	1.0559	-1.01082	1.77508	0.507213
11.5667	-0.08869	-0.6477	0.042295	-0.30738	1.1259	-0.91082	1.72508	0.447213
11.5833	-0.11869	-0.4977	0.042295	-0.43738	1.0659	-0.95082	1.69508	0.297213
11.6	-0.09869	-0.5077	0.092295	-0.33738	1.0359	-1.16082	1.66508	0.127213
11.6167	-0.29869	-0.1277	0.032295	-0.27738	0.825902	-1.28082	1.63508	0.177213
11.6333	-0.39869	-0.2977	-0.0277	-0.25738	0.705902	-1.44082	1.68508	0.277213
11.65	-0.51869	-0.3577	-0.0977	-0.03738	0.695902	-1.55082	1.73508	0.067213
11.6667	-0.50869	0.142295	-0.0477	0.022623	0.605902	-1.66082	1.83508	-0.02279
11.6833	-0.27869	0.632295	0.182295	0.112623	0.655902	-1.61082	2.01508	-0.10279
11.7	0.001311	0.712295	0.262295	0.312623	0.795902	-1.44082	2.18508	-0.23279
11.7167	0.291311	0.562295	0.292295	0.602623	0.825902	-1.27082	2.35508	-0.42279
11.7333	0.501311	0.272295	0.272295	0.512623	0.745902	-1.03082	2.43508	-0.46279
11.75	0.341311	0.202295	0.182295	0.082623	0.685902	-1.11082	2.52508	-0.32279
11.7667	0.111311	0.282295	0.032295	-0.20738	0.675902	-1.51082	2.63508	-0.04279
11.7833	0.021311	0.462295	0.142295	-0.23738	0.625902	-1.53082	2.33508	0.177213
11.8	0.271311	0.672295	0.202295	-0.31738	0.655902	-1.17082	2.18508	0.307213
11.8167	0.421311	0.742295	0.492295	-0.51738	0.755902	-0.31082	2.17508	0.407213
11.8333	0.471311	0.812295	0.872295	-0.50738	0.925902	0.01918	2.09508	0.537213
11.85	0.581311	0.782295	0.962295	-0.43738	0.955902	-0.04082	2.06508	0.427213
11.8667	0.451311	0.712295	0.982295	-0.11738	0.895902	-0.18082	2.26508	0.417213
11.8833	0.261311	0.802295	0.912295	-0.07738	0.845902	-0.40082	2.50508	0.477213
11.9	0.321311	0.782295	0.732295	-0.14738	0.795902	-0.40082	2.49508	0.667213
11.9167	0.481311	0.682295	0.662295	-0.14738	0.735902	-0.36082	2.30508	1.05721
11.9333	0.451311	0.572295	0.882295	-0.16738	0.695902	-0.55082	2.00508	1.21721
11.95	0.031311	0.272295	1.05229	-0.48738	0.585902	-0.68082	1.49508	1.23721
11.9667	-0.20869	0.162295	1.02229	-0.63738	0.585902	-0.80082	1.31508	1.09721
11.9833	-0.32869	0.112295	0.762295	-0.54738	0.645902	-0.80082	1.57508	1.10721
12	-0.07869	-0.0477	0.492295	-0.47738	0.665902	-0.85082	1.66508	1.33721

## Sheet: CalcaKO Cap
Time	Calca+/+	Calca+/+	Calca+/+	Calca-/-	Calca-/-	Calca-/-	Calca-/-	Calca-/-
	T995	U756	U989	U001	U755	U754	U988	U990
-1	0.479672	-0.32803	0.51459	0.161148	-0.86344	-1.47148	-0.56803	-0.40131
-0.98333	0.459672	-0.29803	0.74459	0.271148	-0.95344	-1.47148	-0.63803	-0.29131
-0.96667	0.379672	-0.28803	0.80459	0.191148	-0.98344	-1.63148	-0.66803	-0.09131
-0.95	-0.03033	-0.25803	0.81459	0.331148	-0.99344	-1.68148	-0.61803	0.298689
-0.93333	-0.36033	-0.24803	0.77459	0.381148	-1.01344	-1.64148	-0.49803	0.448689
-0.91667	-0.38033	-0.28803	0.69459	0.421148	-1.02344	-1.50148	-0.42803	0.458689
-0.9	-0.47033	-0.36803	0.68459	0.481148	-1.03344	-1.39148	-0.39803	0.418689
-0.88333	-0.58033	-0.41803	0.91459	0.561148	-1.04344	-1.08148	-0.41803	0.308689
-0.86667	-0.62033	-0.41803	1.00459	0.621148	-1.05344	-1.03148	-0.46803	0.078689
-0.85	-0.48033	-0.45803	1.11459	0.621148	-1.00344	-0.84148	-0.44803	0.038689
-0.83333	-0.37033	-0.53803	1.18459	0.611148	-1.00344	-0.54148	-0.44803	0.058689
-0.81667	-0.30033	-0.59803	1.11459	0.521148	-1.03344	-0.55148	-0.38803	-0.01131
-0.8	-0.29033	-0.61803	0.93459	0.461148	-1.05344	-0.69148	-0.51803	-0.18131
-0.78333	-0.28033	-0.58803	0.73459	0.631148	-1.00344	-0.77148	-0.25803	-0.29131
-0.76667	-0.25033	-0.54803	0.54459	0.691148	-0.95344	-0.74148	0.011967	-0.37131
-0.75	-0.27033	-0.48803	0.26459	0.691148	-0.81344	-0.56148	0.001967	-0.58131
-0.73333	-0.29033	-0.29803	-0.06541	0.661148	-0.56344	-0.49148	0.041967	-0.71131
-0.71667	-0.29033	-0.12803	-0.40541	0.691148	-0.55344	-0.33148	0.161967	-0.64131
-0.7	-0.26033	0.061967	-0.58541	0.721148	-0.66344	0.068525	0.211967	-0.49131
-0.68333	-0.24033	0.311967	-0.62541	0.701148	-0.60344	0.268525	0.211967	-0.38131
-0.66667	-0.21033	0.651967	-0.65541	0.641148	-0.41344	0.358525	0.341967	-0.40131
-0.65	-0.17033	0.821967	-0.55541	0.561148	-0.46344	0.458525	0.571967	-0.47131
-0.63333	-0.15033	0.721967	-0.35541	0.451148	-0.48344	0.538525	0.621967	-0.39131
-0.61667	-0.13033	0.581967	-0.30541	0.351148	-0.30344	0.428525	0.601967	-0.23131
-0.6	-0.09033	0.491967	-0.28541	0.171148	-0.18344	0.308525	0.601967	-0.15131
-0.58333	0.239672	0.311967	-0.23541	0.101148	-0.07344	0.188525	0.551967	-0.14131
-0.56667	0.379672	0.261967	-0.17541	0.081148	0.186557	0.088525	0.441967	-0.14131
-0.55	0.499672	0.341967	-0.11541	0.101148	0.516557	0.058525	0.151967	-0.05131
-0.53333	0.699672	0.491967	-0.24541	0.141148	0.616557	0.068525	0.021967	0.208689
-0.51667	0.859672	0.641967	-0.22541	0.131148	0.616557	0.158525	-0.11803	0.328689
-0.5	0.839672	0.741967	-0.29541	0.081148	0.536557	0.238525	-0.17803	0.338689
-0.48333	0.779672	0.701967	-0.43541	-0.00885	0.536557	0.298525	-0.15803	0.248689
-0.46667	0.869672	0.671967	-0.55541	-0.07885	0.566557	0.398525	-0.04803	0.178689
-0.45	0.889672	0.501967	-0.55541	-0.08885	0.576557	0.498525	-0.07803	-0.02131
-0.43333	0.809672	0.391967	-0.37541	-0.15885	0.586557	0.598525	-0.08803	-0.15131
-0.41667	0.629672	0.201967	-0.23541	-0.22885	0.666557	0.698525	0.001967	-0.18131
-0.4	0.459672	0.171967	-0.37541	-0.28885	0.686557	0.748525	0.041967	-0.18131
-0.38333	0.379672	0.331967	-0.44541	-0.28885	0.656557	0.798525	0.071967	-0.27131
-0.36667	0.319672	0.221967	-0.40541	-0.27885	0.656557	0.828525	0.151967	-0.34131
-0.35	0.259672	0.221967	-0.30541	-0.27885	0.706557	0.908525	0.321967	-0.33131
-0.33333	0.159672	0.291967	-0.19541	-0.23885	0.796557	1.02852	0.241967	-0.03131
-0.31667	0.239672	0.121967	-0.16541	-0.16885	0.846557	1.03852	0.141967	0.038689
-0.3	0.329672	-0.19803	-0.05541	-0.14885	0.866557	0.848525	0.231967	0.008689
-0.28333	0.169672	-0.21803	-0.05541	-0.16885	0.866557	0.378525	0.161967	0.018689
-0.26667	0.089672	-0.25803	-0.08541	-0.12885	0.856557	0.308525	0.071967	0.018689
-0.25	0.109672	-0.27803	-0.11541	-0.14885	0.816557	0.328525	0.111967	-0.00131
-0.23333	0.079672	-0.28803	-0.22541	-0.22885	0.736557	0.238525	0.131967	0.018689
-0.21667	-0.02033	-0.32803	-0.42541	-0.32885	0.696557	0.178525	0.111967	0.048689
-0.2	-0.21033	-0.25803	-0.49541	-0.41885	0.586557	0.158525	0.001967	0.148689
-0.18333	-0.21033	-0.20803	-0.48541	-0.50885	0.436557	0.188525	-0.17803	0.208689
-0.16667	-0.57033	-0.21803	-0.38541	-0.55885	0.466557	0.178525	-0.11803	0.258689
-0.15	-0.75033	-0.19803	-0.23541	-0.64885	0.536557	0.158525	-0.10803	0.308689
-0.13333	-0.72033	-0.07803	-0.17541	-0.73885	0.536557	0.188525	-0.07803	0.378689
-0.11667	-0.65033	-0.00803	-0.16541	-0.78885	0.606557	0.338525	0.001967	0.438689
-0.1	-0.49033	0.011967	-0.12541	-0.80885	0.646557	0.508525	0.051967	0.448689
-0.08333	-0.45033	0.021967	-0.11541	-0.74885	0.756557	0.508525	0.101967	0.448689
-0.06667	-0.34033	-0.00803	-0.11541	-0.74885	0.636557	0.528525	0.131967	0.398689
-0.05	-0.28033	-0.06803	-0.16541	-0.77885	0.186557	0.548525	0.161967	0.308689
-0.03333	-0.20033	-0.15803	-0.09541	-0.88885	0.006557	0.558525	0.291967	0.218689
-0.01667	0.049672	-0.17803	-0.03541	-1.08885	0.056557	0.618525	0.381967	0.318689
0	-0.05033	-0.17803	-0.10541	-1.24885	0.076557	0.588525	0.441967	0.488689
0.016667	-0.21033	-0.14803	-0.30541	-1.16885	-0.05344	0.568525	0.531967	0.668689
0.033333	-1.23033	-0.15803	-0.66541	-1.17885	-1.63344	0.578525	0.571967	0.668689
0.05	0.179672	-0.06803	-0.76541	-1.31885	-0.76344	0.568525	0.461967	0.618689
0.066667	0.319672	-0.40803	-0.64541	-1.34885	-0.14344	0.508525	0.211967	0.678689
0.083333	0.069672	-0.37803	-0.54541	-0.88885	0.176557	0.888525	-1.98803	0.638689
0.1	-0.23033	-0.53803	-0.52541	-1.43885	0.336557	0.748525	-2.12803	0.498689
0.116667	-0.30033	-0.65803	-0.89541	-1.80885	0.466557	0.518525	0.571967	0.438689
0.133333	-0.45033	-0.84803	-0.56541	-1.95885	0.566557	0.198525	0.681967	0.368689
0.15	-0.84033	-1.36803	-0.48541	-2.06885	0.536557	0.398525	0.291967	0.378689
0.166667	-1.15033	-1.87803	-0.59541	-2.29885	0.366557	0.598525	-0.36803	0.928689
0.183333	-1.34033	-2.36803	-0.76541	-2.52885	0.316557	0.418525	-0.86803	0.638689
0.2	-1.48033	-2.58803	-1.16541	-2.94885	0.316557	0.368525	-0.79803	0.008689
0.216667	-1.98033	-2.64803	-1.41541	-3.45885	0.256557	0.378525	-1.12803	-0.12131
0.233333	-2.53033	-2.79803	-1.63541	-3.92885	0.246557	0.308525	-1.78803	-0.18131
0.25	-2.85033	-2.92803	-1.88541	-4.15885	0.066557	0.178525	-1.95803	-0.61131
0.266667	-3.12033	-3.12803	-2.37541	-4.28885	-0.22344	0.028525	-2.17803	-0.85131
0.283333	-3.38033	-3.29803	-2.80541	-4.54885	-0.53344	0.038525	-2.26803	-1.06131
0.3	-3.47033	-3.34803	-3.17541	-4.71885	-0.73344	0.278525	-2.51803	-1.44131
0.316667	-3.61033	-3.39803	-3.40541	-4.91885	-0.96344	0.328525	-2.77803	-1.64131
0.333333	-3.80033	-3.40803	-3.71541	-5.14885	-1.23344	0.208525	-2.90803	-1.66131
0.35	-3.87033	-3.45803	-3.91541	-5.28885	-1.34344	0.008525	-3.02803	-1.83131
0.366667	-3.89033	-3.64803	-3.97541	-5.67885	-1.37344	0.028525	-3.15803	-1.92131
0.383333	-4.12033	-3.92803	-4.01541	-5.78885	-1.49344	0.198525	-3.27803	-2.83131
0.4	-4.31033	-3.92803	-4.07541	-5.75885	-1.87344	0.298525	-3.37803	-3.55131
0.416667	-4.34033	-3.74803	-4.26541	-5.88885	-2.20344	0.338525	-3.43803	-3.72131
0.433333	-4.47033	-3.68803	-4.41541	-5.97885	-2.50344	0.338525	-3.70803	-3.70131
0.45	-4.58033	-3.67803	-4.49541	-6.04885	-2.62344	0.228525	-4.02803	-3.80131
0.466667	-4.58033	-3.61803	-4.53541	-6.22885	-2.61344	0.208525	-4.29803	-4.08131
0.483333	-4.65033	-3.36803	-4.85541	-6.36885	-2.55344	0.248525	-4.33803	-4.30131
0.5	-4.82033	-3.57803	-5.00541	-6.43885	-2.62344	0.198525	-4.35803	-4.43131
0.516667	-4.84033	-3.46803	-5.01541	-6.38885	-2.68344	0.148525	-4.46803	-4.52131
0.533333	-4.74033	-3.26803	-4.99541	-6.31885	-2.66344	0.028525	-4.53803	-4.54131
0.55	-4.60033	-3.23803	-4.97541	-6.17885	-2.59344	-0.00148	-4.61803	-4.60131
0.566667	-4.46033	-3.22803	-4.74541	-5.93885	-2.64344	0.088525	-4.85803	-4.69131
0.583333	-4.39033	-3.14803	-4.71541	-5.92885	-2.87344	0.058525	-5.11803	-4.75131
0.6	-4.36033	-2.77803	-4.79541	-6.03885	-3.00344	-0.03148	-5.10803	-4.82131
0.616667	-4.26033	-2.57803	-4.92541	-5.99885	-3.11344	-0.02148	-5.12803	-4.90131
0.633333	-3.91033	-2.70803	-4.91541	-5.90885	-3.11344	-0.09148	-5.12803	-4.95131
0.65	-3.60033	-2.96803	-4.83541	-5.91885	-3.11344	-0.17148	-5.17803	-5.00131
0.666667	-3.59033	-3.03803	-4.72541	-5.83885	-3.20344	-0.27148	-5.23803	-4.98131
0.683333	-3.85033	-3.04803	-4.47541	-5.74885	-3.39344	-0.25148	-5.28803	-4.98131
0.7	-3.86033	-3.03803	-4.28541	-5.56885	-3.53344	-0.18148	-5.27803	-5.00131
0.716667	-3.65033	-2.98803	-4.16541	-5.34885	-3.52344	-0.19148	-5.20803	-4.99131
0.733333	-3.51033	-2.91803	-4.27541	-4.86885	-3.56344	-0.46148	-5.10803	-4.97131
0.75	-3.31033	-2.77803	-4.44541	-4.65885	-3.62344	-0.74148	-5.03803	-4.90131
0.766667	-3.58033	-2.73803	-4.59541	-4.61885	-3.62344	-0.84148	-4.96803	-4.80131
0.783333	-3.89033	-2.77803	-4.58541	-4.73885	-3.61344	-0.84148	-4.86803	-4.70131
0.8	-3.70033	-2.87803	-4.55541	-4.81885	-3.61344	-0.84148	-4.75803	-4.59131
0.816667	-3.39033	-2.84803	-4.47541	-4.76885	-3.54344	-0.85148	-4.64803	-4.41131
0.833333	-3.45033	-2.81803	-4.35541	-4.94885	-3.52344	-0.89148	-4.52803	-4.25131
0.85	-3.43033	-2.78803	-4.31541	-4.99885	-3.50344	-0.96148	-4.45803	-4.19131
0.866667	-3.38033	-2.75803	-4.34541	-4.90885	-3.45344	-0.97148	-4.58803	-4.15131
0.883333	-3.29033	-2.75803	-4.03541	-4.77885	-3.39344	-1.01148	-4.59803	-4.02131
0.9	-3.14033	-2.72803	-3.72541	-4.63885	-3.31344	-1.06148	-4.45803	-3.90131
0.916667	-3.09033	-2.70803	-3.59541	-4.53885	-3.43344	-1.03148	-4.33803	-3.89131
0.933333	-2.98033	-2.71803	-3.54541	-4.54885	-3.63344	-1.10148	-4.27803	-3.78131
0.95	-2.84033	-2.71803	-3.77541	-4.73885	-3.51344	-1.28148	-4.17803	-3.59131
0.966667	-2.75033	-2.68803	-3.83541	-4.67885	-3.29344	-1.38148	-4.04803	-3.53131
0.983333	-2.64033	-2.71803	-3.70541	-4.58885	-3.21344	-1.45148	-3.98803	-3.51131
1	-2.47033	-2.67803	-3.70541	-4.50885	-3.25344	-1.37148	-3.99803	-3.45131
1.01667	-2.41033	-2.59803	-3.79541	-4.40885	-3.28344	-1.23148	-3.92803	-3.42131
1.03333	-2.48033	-2.50803	-3.77541	-4.30885	-3.28344	-1.18148	-4.07803	-3.35131
1.05	-2.65033	-2.31803	-3.60541	-4.19885	-3.21344	-1.23148	-4.14803	-3.23131
1.06667	-2.68033	-2.19803	-3.41541	-4.13885	-3.15344	-1.22148	-3.99803	-3.13131
1.08333	-2.62033	-2.14803	-3.38541	-4.22885	-3.08344	-1.41148	-3.69803	-3.10131
1.1	-2.61033	-2.04803	-3.38541	-4.46885	-3.04344	-1.41148	-4.07803	-3.18131
1.11667	-2.56033	-1.99803	-3.18541	-4.49885	-2.95344	-1.45148	-4.36803	-3.07131
1.13333	-2.48033	-2.01803	-2.94541	-4.14885	-2.87344	-1.42148	-4.30803	-3.05131
1.15	-2.28033	-2.05803	-2.78541	-3.90885	-2.76344	-1.32148	-4.31803	-3.00131
1.16667	-2.08033	-2.06803	-2.69541	-3.61885	-2.65344	-1.26148	-4.42803	-2.91131
1.18333	-1.64033	-2.07803	-2.40541	-3.49885	-2.59344	-1.21148	-4.55803	-2.80131
1.2	-1.20033	-2.18803	-2.24541	-3.39885	-2.56344	-1.21148	-4.78803	-2.69131
1.21667	-1.20033	-2.27803	-2.12541	-3.29885	-2.70344	-1.35148	-4.86803	-2.56131
1.23333	-1.27033	-2.24803	-2.06541	-3.20885	-2.68344	-1.40148	-4.85803	-2.47131
1.25	-1.25033	-2.14803	-2.06541	-3.20885	-2.64344	-1.39148	-4.69803	-2.36131
1.26667	-1.17033	-2.03803	-1.97541	-3.38885	-2.61344	-1.17148	-4.47803	-2.23131
1.28333	-1.50033	-1.89803	-1.63541	-3.53885	-2.57344	-1.01148	-4.26803	-2.15131
1.3	-1.99033	-1.82803	-1.63541	-3.50885	-2.49344	-1.02148	-4.10803	-2.06131
1.31667	-2.14033	-1.78803	-1.66541	-3.43885	-2.44344	-1.04148	-4.12803	-2.04131
1.33333	-2.23033	-1.73803	-1.75541	-3.37885	-2.37344	-0.52148	-4.07803	-1.99131
1.35	-2.19033	-1.66803	-1.62541	-3.15885	-2.30344	-0.25148	-3.88803	-1.90131
1.36667	-2.29033	-1.61803	-1.31541	-3.10885	-2.28344	-0.18148	-3.62803	-1.85131
1.38333	-2.36033	-1.56803	-1.30541	-3.04885	-2.27344	-0.00148	-3.43803	-1.82131
1.4	-2.38033	-1.35803	-1.33541	-2.84885	-2.23344	0.088525	-3.13803	-1.73131
1.41667	-2.00033	-1.17803	-1.21541	-2.75885	-2.18344	0.088525	-2.95803	-1.62131
1.43333	-2.05033	-1.16803	-1.08541	-2.69885	-2.12344	0.078525	-2.95803	-1.58131
1.45	-2.25033	-1.29803	-1.01541	-2.77885	-2.01344	0.118525	-2.89803	-1.66131
1.46667	-2.21033	-1.47803	-0.97541	-3.05885	-2.00344	0.038525	-2.80803	-1.69131
1.48333	-1.27033	-1.49803	-0.97541	-3.04885	-1.97344	0.008525	-2.71803	-1.50131
1.5	-0.88033	-1.33803	-0.95541	-3.10885	-1.95344	0.078525	-2.69803	-1.34131
1.51667	-0.67033	-1.29803	-0.91541	-3.34885	-1.97344	0.138525	-2.47803	-1.27131
1.53333	-0.41033	-1.03803	-0.97541	-3.34885	-1.87344	0.188525	-1.91803	-1.11131
1.55	-0.20033	-0.95803	-0.76541	-3.18885	-1.82344	0.298525	-1.67803	-0.98131
1.56667	-0.07033	-0.93803	-0.52541	-2.99885	-2.00344	0.378525	-1.51803	-0.89131
1.58333	0.069672	-0.92803	-0.48541	-2.84885	-2.10344	0.358525	-1.25803	-0.71131
1.6	0.169672	-0.97803	-0.48541	-2.78885	-1.94344	0.358525	-1.15803	-0.58131
1.61667	0.189672	-1.09803	-0.59541	-2.64885	-2.02344	0.478525	-1.14803	-0.60131
1.63333	0.229672	-1.14803	-0.88541	-2.53885	-2.07344	0.628525	-1.22803	-0.68131
1.65	0.309672	-1.16803	-0.95541	-2.42885	-2.04344	0.658525	-1.24803	-0.74131
1.66667	0.369672	-1.17803	-0.87541	-2.35885	-2.10344	0.768525	-1.02803	-0.72131
1.68333	0.439672	-1.12803	-0.71541	-2.26885	-2.18344	0.878525	-0.96803	-0.70131
1.7	0.519672	-1.01803	-0.67541	-2.24885	-2.19344	0.948525	-0.94803	-0.66131
1.71667	0.559672	-0.96803	-0.63541	-2.24885	-2.19344	0.978525	-0.85803	-0.60131
1.73333	0.599672	-1.00803	-0.54541	-2.42885	-2.16344	1.02852	-0.60803	-0.55131
1.75	0.699672	-0.99803	-0.48541	-2.34885	-2.17344	1.03852	-0.43803	-0.46131
1.76667	0.769672	-1.00803	-0.15541	-1.96885	-2.26344	1.04852	-0.39803	-0.36131
1.78333	0.769672	-0.99803	0.00459	-1.81885	-2.38344	1.11852	-0.35803	-0.32131
1.8	0.769672	-0.98803	0.17459	-1.54885	-2.39344	1.14853	-0.11803	-0.22131
1.81667	0.789672	-1.03803	0.20459	-1.61885	-2.30344	1.07852	0.051967	-0.18131
1.83333	0.809672	-1.01803	0.30459	-1.69885	-2.25344	0.928525	0.291967	-0.06131
1.85	0.789672	-0.97803	0.34459	-1.61885	-2.23344	0.938525	0.421967	0.038689
1.86667	0.819672	-0.93803	0.38459	-1.57885	-2.19344	0.908525	0.501967	0.098689
1.88333	0.749672	-0.91803	0.40459	-1.52885	-2.17344	0.928525	0.471967	0.108689
1.9	0.539672	-0.90803	0.43459	-1.34885	-2.14344	1.04852	0.381967	0.168689
1.91667	0.799672	-0.92803	0.42459	-1.28885	-2.13344	1.10852	0.461967	0.198689
1.93333	0.929672	-0.94803	0.43459	-1.15885	-2.13344	1.09852	0.331967	0.208689
1.95	0.859672	-0.93803	0.46459	-1.08885	-2.13344	1.08852	0.221967	0.218689
1.96667	0.929672	-0.85803	0.41459	-1.01885	-2.14344	1.17853	0.211967	0.288689
1.98333	0.979672	-0.72803	0.45459	-1.05885	-2.10344	1.63853	0.161967	0.458689
2	0.829672	-0.66803	0.56459	-1.10885	-2.01344	1.80852	0.241967	0.488689
2.01667	0.609672	-0.65803	0.61459	-0.99885	-1.96344	1.91853	0.381967	0.228689
2.03333	0.249672	-0.66803	0.62459	-0.96885	-1.92344	1.76852	0.531967	-0.00131
2.05	-0.14033	-0.70803	0.64459	-1.32885	-1.93344	1.15853	0.581967	-0.05131
2.06667	-0.36033	-0.75803	0.65459	-1.53885	-1.95344	1.05852	0.711967	-0.12131
2.08333	-0.42033	-0.82803	0.63459	-1.61885	-1.83344	1.12853	0.811967	0.118689
2.1	-0.45033	-0.72803	0.57459	-1.65885	-1.79344	1.11852	0.851967	0.238689
2.11667	-0.42033	-0.59803	0.63459	-1.61885	-1.72344	1.04852	0.881967	0.348689
2.13333	-0.39033	-0.52803	0.61459	-1.53885	-1.66344	0.968525	0.881967	0.398689
2.15	-0.34033	-0.49803	0.55459	-1.36885	-1.64344	0.978525	0.851967	0.458689
2.16667	-0.14033	-0.40803	0.35459	-0.83885	-1.73344	1.09852	0.801967	0.468689
2.18333	-0.05033	-0.17803	0.01459	-0.66885	-1.83344	0.998525	0.761967	0.408689
2.2	0.239672	0.071967	-0.32541	-0.67885	-1.81344	0.898525	0.701967	0.338689
2.21667	0.219672	0.251967	-0.43541	-0.63885	-1.70344	1.04852	0.631967	0.398689
2.23333	0.179672	0.641967	-0.58541	-0.46885	-1.66344	1.25852	0.591967	0.438689
2.25	0.229672	0.961967	-0.63541	-0.32885	-1.66344	1.34852	0.581967	0.558689
2.26667	0.249672	1.11197	-0.96541	-0.32885	-1.67344	1.42853	0.531967	0.568689
2.28333	0.159672	0.681967	-2.13541	-0.36885	-1.66344	1.51852	0.411967	0.518689
2.3	-0.03033	0.341967	-2.61541	-0.39885	-1.61344	1.58852	0.341967	0.538689
2.31667	-0.02033	0.361967	-2.64541	-0.43885	-1.55344	1.62853	0.301967	0.468689
2.33333	0.109672	0.331967	-2.26541	-0.45885	-1.55344	1.59852	0.211967	0.508689
2.35	0.379672	0.361967	-2.11541	-0.50885	-1.56344	1.63853	0.171967	0.628689
2.36667	0.609672	0.331967	-1.89541	-0.68885	-1.55344	1.65853	0.061967	0.708689
2.38333	0.569672	0.061967	-1.47541	-0.80885	-1.54344	1.51852	-0.02803	0.728689
2.4	0.599672	-0.05803	-1.01541	-0.90885	-1.56344	1.46853	-0.01803	0.648689
2.41667	0.779672	-0.07803	-0.88541	-0.93885	-1.58344	1.46853	-0.03803	0.608689
2.43333	0.799672	0.011967	-0.98541	-1.04885	-1.58344	1.60852	-0.16803	0.618689
2.45	0.879672	0.251967	-0.88541	-1.15885	-1.58344	1.46853	-0.19803	0.498689
2.46667	0.779672	0.491967	-0.70541	-1.22885	-1.54344	1.06852	-0.18803	0.428689
2.48333	0.399672	0.591967	-0.53541	-1.19885	-1.41344	0.898525	-0.13803	0.478689
2.5	0.329672	0.541967	-0.25541	-1.02885	-1.32344	0.868525	-0.03803	0.588689
2.51667	0.339672	0.451967	-0.09541	-0.93885	-1.34344	1.08852	0.021967	0.708689
2.53333	0.229672	0.421967	-0.18541	-1.08885	-1.40344	0.848525	0.021967	0.638689
2.55	0.239672	0.371967	-0.32541	-1.43885	-1.39344	0.248525	0.021967	0.588689
2.56667	0.419672	0.351967	-0.33541	-1.39885	-1.30344	0.048525	0.031967	0.498689
2.58333	0.519672	0.311967	-0.33541	-1.33885	-1.16344	0.048525	0.061967	0.428689
2.6	0.559672	0.151967	-0.30541	-1.34885	-0.98344	0.208525	-0.04803	0.428689
2.61667	0.679672	0.191967	-0.27541	-1.45885	-0.91344	0.488525	-0.08803	0.458689
2.63333	0.829672	0.311967	-0.22541	-1.37885	-0.88344	0.498525	-0.13803	0.448689
2.65	0.949672	0.361967	-0.18541	-1.33885	-0.79344	0.458525	-0.38803	0.418689
2.66667	1.00967	0.341967	-0.18541	-1.42885	-0.78344	0.448525	-0.49803	0.408689
2.68333	0.929672	0.401967	-0.18541	-1.31885	-0.90344	0.288525	-0.44803	0.518689
2.7	0.659672	0.611967	-0.23541	-0.90885	-0.95344	-0.04148	-0.40803	0.678689
2.71667	0.579672	0.961967	-0.24541	-0.57885	-0.87344	-0.29148	-0.47803	0.748689
2.73333	0.589672	1.01197	-0.27541	-0.61885	-0.79344	-0.30148	-0.51803	0.968689
2.75	0.439672	0.971967	-0.39541	-0.59885	-0.74344	-0.25148	-0.51803	0.988689
2.76667	0.209672	0.781967	-0.41541	-0.55885	-0.67344	-0.30148	-0.52803	1.01869
2.78333	0.189672	0.661967	-0.34541	-0.58885	-0.61344	-0.18148	-0.62803	1.13869
2.8	0.329672	0.771967	-0.16541	-0.87885	-0.52344	-0.15148	-0.69803	1.21869
2.81667	0.449672	0.811967	0.09459	-1.51885	-0.42344	-0.15148	-0.61803	1.05869
2.83333	0.639672	0.861967	0.25459	-1.90885	-0.34344	-0.13148	-0.64803	0.928689
2.85	0.739672	0.921967	0.29459	-1.83885	-0.45344	-0.11148	-0.64803	0.908689
2.86667	0.719672	0.921967	0.42459	-1.57885	-0.33344	-0.08148	-0.53803	0.848689
2.88333	0.659672	0.831967	0.39459	-1.42885	-0.11344	-0.21148	-0.46803	0.798689
2.9	0.509672	0.731967	0.22459	-2.03885	-0.09344	-0.34148	-0.42803	0.768689
2.91667	0.339672	0.641967	0.20459	-2.19885	-0.08344	-0.30148	-0.51803	0.768689
2.93333	0.129672	0.571967	0.30459	-2.33885	-0.04344	-0.20148	-0.75803	0.758689
2.95	0.069672	0.531967	0.32459	-2.46885	0.016557	-0.10148	-0.87803	0.758689
2.96667	0.089672	0.461967	0.26459	-2.56885	0.046557	-0.03148	-0.85803	0.778689
2.98333	0.129672	0.351967	0.24459	-2.52885	0.046557	-0.02148	-0.88803	0.838689
3	0.319672	0.261967	0.19459	-2.48885	0.026557	0.048525	-0.77803	0.948689
3.01667	0.559672	0.171967	0.17459	-2.67885	-0.04344	0.198525	-0.62803	1.07869
3.03333	0.649672	0.091967	0.17459	-2.84885	-0.09344	0.278525	-0.38803	1.09869
3.05	0.669672	0.031967	0.01459	-2.96885	-0.13344	0.358525	-0.21803	1.17869
3.06667	0.769672	0.051967	-0.07541	-2.88885	-0.19344	0.418525	0.021967	1.19869
3.08333	0.829672	0.101967	-0.12541	-2.32885	-0.26344	0.948525	0.211967	1.23869
3.1	0.739672	0.131967	-0.17541	-2.18885	-0.45344	1.00852	0.351967	1.25869
3.11667	0.819672	0.081967	-0.24541	-2.08885	-0.58344	0.758525	0.471967	1.28869
3.13333	1.10967	0.011967	-0.40541	-2.09885	-0.65344	0.268525	0.501967	1.33869
3.15	1.25967	-0.03803	-0.47541	-2.25885	-0.68344	0.128525	0.461967	1.33869
3.16667	1.37967	-0.05803	-0.61541	-2.19885	-0.71344	0.158525	0.451967	1.30869
3.18333	1.44967	-0.07803	-0.82541	-2.07885	-0.73344	0.258525	0.451967	1.27869
3.2	1.32967	-0.10803	-0.94541	-2.05885	-0.77344	0.268525	0.461967	1.24869
3.21667	1.31967	-0.12803	-0.85541	-2.03885	-0.79344	0.238525	0.431967	1.26869
3.23333	1.41967	-0.14803	-0.75541	-2.04885	-0.79344	0.338525	0.371967	1.29869
3.25	1.58967	-0.14803	-0.68541	-2.12885	-0.76344	0.638525	0.371967	1.23869
3.26667	1.70967	-0.14803	-0.52541	-2.16885	-0.73344	0.688525	0.371967	1.09869
3.28333	1.80967	-0.15803	-0.30541	-2.16885	-0.72344	0.728525	0.551967	1.06869
3.3	1.99967	-0.10803	-0.24541	-2.14885	-0.73344	0.768525	0.861967	1.06869
3.31667	2.00967	-0.02803	-0.41541	-2.12885	-0.73344	0.738525	0.891967	0.978689
3.33333	1.95967	0.021967	-0.44541	-2.10885	-0.74344	0.728525	0.851967	0.888689
3.35	1.93967	0.011967	-0.42541	-2.06885	-0.73344	0.728525	0.811967	0.718689
3.36667	2.00967	-0.03803	-0.41541	-1.99885	-0.59344	0.728525	0.791967	0.508689
3.38333	2.11967	-0.05803	-0.39541	-1.71885	-0.57344	0.748525	0.811967	0.368689
3.4	2.22967	0.051967	-0.41541	-1.43885	-0.58344	0.768525	0.751967	0.238689
3.41667	2.19967	0.171967	-0.36541	-1.32885	-0.59344	0.828525	0.691967	0.138689
3.43333	2.01967	0.201967	-0.32541	-1.36885	-0.60344	0.928525	0.681967	0.168689
3.45	2.25967	0.181967	-0.34541	-1.48885	-0.62344	1.09852	0.641967	0.298689
3.46667	2.22967	0.181967	-0.58541	-1.38885	-0.63344	1.03852	0.811967	0.538689
3.48333	1.99967	0.201967	-0.56541	-1.31885	-0.62344	0.628525	0.801967	0.588689
3.5	1.69967	0.241967	-0.49541	-1.06885	-0.67344	0.498525	0.631967	0.488689
3.51667	1.51967	0.321967	-0.38541	-1.03885	-0.76344	0.488525	0.581967	0.588689
3.53333	1.45967	0.371967	-0.26541	-1.00885	-0.80344	0.498525	0.391967	0.708689
3.55	1.53967	0.391967	-0.02541	-0.99885	-0.79344	0.528525	0.401967	0.788689
3.56667	1.70967	0.401967	0.10459	-1.01885	-0.82344	0.558525	0.401967	0.888689
3.58333	1.97967	0.351967	0.24459	-1.08885	-0.83344	0.558525	0.371967	1.10869
3.6	2.19967	0.371967	0.12459	-1.50885	-0.83344	0.528525	0.311967	1.18869
3.61667	2.40967	0.421967	-0.02541	-1.59885	-0.82344	0.538525	0.301967	1.17869
3.63333	2.41967	0.401967	-0.04541	-1.56885	-0.83344	0.578525	0.511967	1.20869
3.65	2.39967	0.251967	-0.01541	-1.70885	-0.85344	0.578525	0.701967	1.24869
3.66667	2.35967	0.321967	-0.10541	-1.88885	-0.83344	0.568525	0.661967	1.21869
3.68333	2.25967	0.511967	0.02459	-1.76885	-0.76344	0.548525	0.541967	1.13869
3.7	2.24967	0.601967	0.13459	-1.55885	-0.71344	0.548525	0.481967	1.12869
3.71667	2.25967	0.661967	-0.09541	-1.51885	-0.67344	0.558525	0.351967	1.19869
3.73333	2.25967	0.701967	-0.22541	-1.44885	-0.63344	0.548525	0.321967	1.32869
3.75	2.26967	0.781967	-0.27541	-1.26885	-0.60344	0.528525	0.401967	1.40869
3.76667	2.23967	0.971967	-0.30541	-1.22885	-0.55344	0.498525	0.411967	1.38869
3.78333	2.17967	1.12197	-0.34541	-1.29885	-0.45344	0.478525	0.401967	1.30869
3.8	2.05967	1.31197	-0.46541	-1.38885	-0.37344	0.478525	0.411967	1.20869
3.81667	2.02967	1.42197	-0.55541	-1.36885	-0.29344	0.458525	0.381967	1.11869
3.83333	1.99967	1.46197	-0.57541	-0.73885	-0.18344	0.468525	0.321967	1.11869
3.85	1.69967	1.50197	-0.60541	-0.43885	-0.01344	0.488525	0.321967	1.16869
3.86667	1.45967	1.59197	-0.66541	-0.55885	0.116557	0.518525	0.381967	1.23869
3.88333	1.39967	1.61197	-0.64541	-1.15885	0.146557	0.448525	0.401967	1.30869
3.9	1.38967	1.58197	-0.78541	-1.16885	0.176557	0.438525	0.441967	1.35869
3.91667	1.31967	1.49197	-0.88541	-0.93885	0.236557	0.518525	0.491967	1.38869
3.93333	1.01967	1.43197	-0.99541	-0.78885	0.296557	0.538525	0.491967	1.43869
3.95	0.959672	1.32197	-1.04541	-0.43885	0.266557	0.458525	0.441967	1.47869
3.96667	0.949672	1.20197	-1.02541	0.111148	0.286557	0.488525	0.331967	1.48869
3.98333	0.929672	1.16197	-1.01541	0.201148	0.406557	0.498525	0.241967	1.49869
4	0.869672	1.12197	-0.98541	0.191148	0.436557	0.458525	0.121967	1.42869
4.01667	0.859672	1.10197	-0.99541	0.221148	0.406557	0.448525	-0.20803	1.35869
4.03333	0.829672	1.14197	-1.03541	0.211148	0.356557	0.428525	-0.56803	1.34869
4.05	0.819672	1.15197	-1.09541	0.001148	0.316557	0.428525	-0.79803	1.33869
4.06667	0.789672	1.21197	-1.15541	-0.15885	0.256557	0.398525	-0.94803	1.31869
4.08333	0.719672	1.26197	-1.19541	-0.27885	0.106557	0.458525	-1.11803	1.34869
4.1	0.729672	1.16197	-1.23541	-0.37885	-0.05344	0.438525	-0.99803	1.34869
4.11667	0.779672	0.961967	-1.27541	-0.42885	-0.15344	0.388525	-0.81803	1.32869
4.13333	0.969672	0.901967	-1.31541	-0.42885	-0.18344	0.378525	-0.75803	1.31869
4.15	1.05967	0.911967	-1.35541	-0.49885	-0.17344	0.458525	-0.53803	1.28869
4.16667	0.989672	1.02197	-1.39541	-0.54885	-0.17344	0.488525	-0.38803	1.23869
4.18333	1.09967	1.07197	-1.39541	-0.63885	-0.14344	0.498525	-0.34803	1.11869
4.2	1.17967	1.04197	-1.41541	-0.68885	-0.11344	0.498525	-0.29803	0.958689
4.21667	1.16967	0.931967	-1.37541	-0.68885	-0.09344	0.508525	-0.25803	0.878689
4.23333	1.27967	0.871967	-1.37541	-0.70885	-0.11344	0.548525	-0.22803	0.728689
4.25	1.35967	0.981967	-1.37541	-0.71885	-0.17344	0.588525	-0.18803	0.508689
4.26667	1.30967	1.10197	-1.27541	-0.66885	-0.18344	0.658525	-0.17803	0.308689
4.28333	1.28967	1.20197	-1.14541	-0.62885	-0.15344	0.678525	-0.15803	0.248689
4.3	1.31967	1.27197	-1.02541	-1.09885	-0.12344	0.538525	-0.14803	0.258689
4.31667	1.13967	1.29197	-0.97541	-1.22885	-0.08344	0.438525	0.011967	0.328689
4.33333	0.899672	1.30197	-0.91541	-1.07885	-0.00344	0.488525	0.081967	0.348689
4.35	1.18967	1.31197	-0.82541	-1.05885	0.126557	0.518525	0.161967	0.408689
4.36667	1.27967	1.34197	-0.77541	-1.20885	-0.02344	0.518525	0.241967	0.558689
4.38333	1.35967	1.25197	-0.69541	-1.16885	-0.20344	0.588525	0.261967	0.628689
4.4	1.34967	1.16197	-0.67541	-1.09885	-0.31344	0.958525	0.341967	0.668689
4.41667	1.29967	1.19197	-0.64541	-1.11885	-0.47344	1.65853	0.401967	0.578689
4.43333	1.21967	0.841967	-0.61541	-1.17885	-0.58344	1.95853	0.421967	0.528689
4.45	1.09967	0.661967	-0.60541	-1.14885	-0.86344	2.09852	0.421967	0.598689
4.46667	1.07967	0.641967	-0.60541	-1.09885	-1.00344	2.12852	0.411967	0.758689
4.48333	1.06967	0.521967	-0.58541	-0.94885	-1.07344	2.12852	0.411967	0.768689
4.5	1.06967	0.461967	-0.44541	-0.89885	-1.24344	2.04853	0.411967	0.718689
4.51667	1.12967	0.391967	-0.29541	-0.90885	-1.38344	1.89853	0.441967	0.758689
4.53333	1.18967	0.331967	-0.24541	-1.02885	-1.46344	1.77852	0.461967	0.818689
4.55	1.20967	0.401967	-0.32541	-1.01885	-1.60344	1.69853	0.471967	0.858689
4.56667	1.23967	0.561967	-0.28541	-0.89885	-1.68344	1.49853	0.501967	0.738689
4.58333	1.28967	0.711967	-0.11541	-1.10885	-1.71344	1.40853	0.621967	0.388689
4.6	1.27967	0.511967	-0.06541	-1.13885	-1.68344	1.32852	0.651967	0.308689
4.61667	1.20967	0.301967	-0.11541	-0.97885	-1.57344	1.17853	0.631967	0.348689
4.63333	1.05967	0.211967	-0.09541	-0.89885	-1.54344	1.13853	0.591967	0.448689
4.65	0.909672	0.321967	0.10459	-0.89885	-1.36344	1.18853	0.571967	0.478689
4.66667	0.799672	0.391967	0.74459	-0.97885	-1.24344	1.25852	0.571967	0.448689
4.68333	0.769672	0.191967	0.79459	-1.04885	-1.25344	1.27852	0.651967	0.388689
4.7	0.739672	-0.00803	0.44459	-0.99885	-1.40344	1.31852	0.671967	0.378689
4.71667	0.639672	-0.07803	0.10459	-0.91885	-1.93344	1.41853	0.671967	0.428689
4.73333	0.839672	-0.12803	-0.30541	-0.94885	-2.17344	1.51852	0.711967	0.538689
4.75	1.02967	-0.09803	-0.34541	-1.00885	-2.22344	1.54852	1.01197	0.648689
4.76667	0.979672	-0.01803	-0.36541	-1.11885	-2.28344	1.45853	1.20197	0.658689
4.78333	0.979672	0.041967	-0.53541	-0.95885	-2.30344	1.12853	0.971967	0.758689
4.8	0.639672	0.061967	-0.70541	-0.72885	-2.30344	0.908525	0.931967	0.928689
4.81667	0.409672	0.081967	-0.84541	-0.27885	-2.30344	0.828525	0.961967	0.938689
4.83333	0.189672	0.161967	-0.77541	0.091148	-2.29344	0.828525	1.03197	0.808689
4.85	0.089672	0.241967	-0.74541	0.121148	-2.24344	0.908525	1.05197	0.668689
4.86667	0.049672	0.301967	-0.88541	0.031148	-2.21344	0.978525	0.891967	0.668689
4.88333	0.069672	0.391967	-0.83541	-0.09885	-2.15344	0.928525	0.731967	0.708689
4.9	0.189672	0.491967	-0.60541	-0.19885	-2.06344	0.718525	0.641967	0.718689
4.91667	0.319672	0.541967	-0.38541	-0.23885	-1.88344	0.348525	0.401967	0.398689
4.93333	0.359672	0.541967	-0.32541	-0.30885	-1.79344	0.178525	0.181967	0.258689
4.95	0.269672	0.561967	-0.45541	-0.34885	-1.69344	0.168525	0.161967	0.278689
4.96667	0.189672	0.561967	-0.63541	-0.32885	-1.58344	0.198525	-0.00803	0.228689
4.98333	0.189672	0.521967	-0.85541	-0.28885	-1.51344	0.248525	-0.22803	0.238689
5	0.129672	0.551967	-0.95541	-0.31885	-1.48344	0.338525	-0.24803	0.018689
5.01667	0.109672	0.611967	-0.86541	-0.35885	-1.54344	0.448525	-0.03803	-0.20131
5.03333	0.149672	0.651967	-0.80541	-0.46885	-1.58344	0.538525	0.141967	0.118689
5.05	0.169672	0.681967	-0.73541	-0.51885	-1.57344	0.608525	0.241967	0.338689
5.06667	0.159672	0.731967	-0.59541	-0.49885	-1.54344	0.648525	0.281967	0.328689
5.08333	0.189672	0.751967	-0.38541	-0.35885	-1.55344	0.668525	0.371967	0.348689
5.1	0.239672	0.761967	-0.35541	-0.41885	-1.56344	0.658525	0.511967	0.448689
5.11667	0.269672	0.781967	-0.50541	-0.38885	-1.63344	0.658525	0.601967	0.368689
5.13333	0.279672	0.731967	-0.49541	-0.30885	-1.62344	0.618525	0.581967	0.128689
5.15	0.299672	0.691967	-0.41541	-0.40885	-1.61344	0.578525	0.601967	0.128689
5.16667	0.329672	0.691967	-0.34541	-0.67885	-1.62344	0.588525	0.721967	0.068689
5.18333	0.379672	0.671967	-0.27541	-0.86885	-1.62344	0.618525	0.871967	-0.07131
5.2	0.469672	0.641967	-0.24541	-1.06885	-1.61344	0.638525	0.951967	-0.13131
5.21667	0.569672	0.631967	-0.28541	-1.21885	-1.47344	0.678525	0.991967	-0.16131
5.23333	0.599672	0.721967	-0.23541	-1.30885	-1.29344	0.758525	1.07197	-0.14131
5.25	0.649672	0.831967	-0.15541	-1.20885	-1.21344	0.798525	1.36197	-0.06131
5.26667	0.679672	0.841967	0.04459	-1.08885	-1.15344	0.808525	1.55197	-0.03131
5.28333	0.679672	0.791967	0.20459	-1.06885	-1.14344	0.778525	1.51197	-0.05131
5.3	0.689672	0.901967	0.28459	-1.13885	-1.14344	0.778525	1.38197	-0.04131
5.31667	0.739672	0.991967	0.26459	-1.40885	-1.12344	0.748525	1.39197	0.048689
5.33333	0.849672	1.22197	0.14459	-1.58885	-1.05344	0.728525	1.41197	0.148689
5.35	1.18967	1.28197	0.02459	-1.29885	-1.07344	0.698525	1.38197	0.208689
5.36667	1.14967	1.34197	0.00459	-1.15885	-1.05344	0.688525	1.30197	0.258689
5.38333	0.819672	1.37197	-0.02541	-1.20885	-0.90344	0.748525	1.11197	0.318689
5.4	0.759672	1.37197	-0.02541	-1.58885	-0.76344	0.818525	1.01197	0.428689
5.41667	0.729672	1.41197	-0.01541	-1.91885	-0.66344	0.868525	1.08197	0.578689
5.43333	0.679672	1.46197	0.03459	-1.72885	-0.57344	0.848525	1.18197	0.598689
5.45	0.599672	1.52197	-0.01541	-1.37885	-0.44344	0.938525	1.20197	0.558689
5.46667	0.539672	1.57197	-0.10541	-1.34885	-0.31344	0.988525	1.34197	0.358689
5.48333	0.359672	1.62197	-0.16541	-1.43885	-0.20344	0.948525	1.46197	0.238689
5.5	0.419672	1.71197	-0.20541	-1.54885	-0.06344	0.898525	1.47197	0.168689
5.51667	0.499672	1.75197	-0.19541	-1.49885	-0.08344	0.878525	1.59197	0.098689
5.53333	0.449672	1.67197	-0.18541	-1.43885	-0.25344	0.838525	1.60197	0.038689
5.55	0.419672	1.56197	-0.13541	-1.43885	-0.31344	0.818525	1.43197	0.048689
5.56667	0.619672	1.63197	-0.16541	-1.49885	-0.07344	0.838525	1.28197	0.198689
5.58333	0.809672	1.66197	-0.32541	-1.54885	0.356557	0.838525	1.16197	0.288689
5.6	0.879672	1.61197	-0.33541	-1.55885	0.576557	0.858525	0.971967	0.318689
5.61667	0.939672	1.57197	-0.31541	-1.54885	0.636557	0.888525	0.861967	0.328689
5.63333	0.959672	1.51197	-0.30541	-1.58885	0.666557	0.908525	0.871967	0.348689
5.65	0.999672	1.47197	-0.31541	-1.61885	0.576557	0.928525	0.791967	0.378689
5.66667	1.07967	1.41197	-0.34541	-1.62885	0.666557	1.01852	0.791967	0.288689
5.68333	1.09967	1.37197	-0.32541	-1.59885	0.926557	1.19853	0.831967	0.248689
5.7	0.949672	1.33197	-0.24541	-1.61885	1.16656	1.35852	0.841967	0.258689
5.71667	0.819672	1.33197	-0.22541	-1.61885	1.08656	1.49853	0.891967	0.348689
5.73333	0.839672	1.27197	-0.18541	-1.61885	1.04656	1.56852	0.841967	0.738689
5.75	0.799672	1.17197	-0.05541	-1.60885	1.11656	1.70853	0.651967	0.768689
5.76667	0.769672	1.10197	-0.00541	-1.56885	1.07656	1.82852	0.501967	0.818689
5.78333	0.669672	1.04197	0.04459	-1.52885	1.03656	1.70853	0.411967	0.878689
5.8	0.469672	0.991967	0.05459	-1.51885	1.06656	1.67853	0.401967	0.948689
5.81667	0.209672	1.01197	-0.01541	-1.50885	1.02656	1.69853	0.441967	1.00869
5.83333	0.029672	1.13197	0.04459	-1.50885	0.916557	1.90853	0.461967	1.03869
5.85	0.079672	1.19197	0.11459	-1.42885	0.976557	1.89853	0.461967	0.958689
5.86667	0.149672	1.18197	0.12459	-1.32885	0.816557	1.87853	0.561967	1.05869
5.88333	0.109672	1.17197	0.11459	-1.21885	0.916557	2.02853	0.631967	1.20869
5.9	0.159672	1.14197	0.12459	-1.19885	1.22656	2.12852	0.681967	1.27869
5.91667	-0.01033	1.11197	0.23459	-1.04885	1.10656	2.23853	0.681967	1.30869
5.93333	-0.22033	1.05197	0.33459	-0.66885	0.966557	2.00853	0.671967	1.33869
5.95	0.009672	1.00197	0.36459	-0.58885	0.656557	1.77852	0.641967	1.31869
5.96667	0.149672	0.991967	0.35459	-0.54885	0.386557	1.86852	0.651967	1.32869
5.98333	0.109672	1.02197	0.40459	-0.65885	0.356557	1.93853	0.721967	1.33869
6	-0.05033	1.11197	0.42459	-0.99885	0.406557	2.32852	0.791967	1.36869
6.01667	-0.17033	1.18197	0.37459	-0.91885	0.446557	2.28852	0.921967	1.39869
6.03333	-0.30033	1.23197	0.34459	-0.70885	0.366557	2.04853	1.11197	1.45869
6.05	-0.37033	1.26197	0.33459	-0.54885	0.346557	1.80852	1.09197	1.46869
6.06667	-0.32033	1.29197	0.29459	-0.55885	0.376557	1.60852	0.971967	1.40869
6.08333	-0.17033	1.35197	0.34459	-0.54885	0.336557	1.68853	1.00197	1.28869
6.1	0.039672	1.40197	0.46459	-0.51885	0.276557	1.81852	1.00197	1.20869
6.11667	0.189672	1.49197	0.58459	-0.53885	0.166557	1.57852	0.831967	1.14869
6.13333	0.239672	1.56197	0.67459	-0.60885	0.086557	1.00852	0.741967	1.22869
6.15	0.239672	1.56197	0.77459	-0.62885	0.036557	0.798525	0.691967	1.19869
6.16667	0.269672	1.54197	0.81459	-0.63885	-0.03344	0.578525	0.601967	0.888689
6.18333	0.299672	1.55197	0.84459	-0.70885	-0.24344	0.568525	0.561967	0.708689
6.2	0.459672	1.57197	0.89459	-0.75885	-0.33344	0.688525	0.531967	0.668689
6.21667	0.579672	1.55197	0.94459	-0.78885	-0.41344	0.718525	0.601967	0.628689
6.23333	0.579672	1.55197	1.02459	-0.80885	-0.31344	0.688525	0.651967	0.558689
6.25	0.559672	1.62197	1.01459	-0.80885	-0.32344	0.728525	0.831967	0.488689
6.26667	0.639672	1.64197	1.04459	-0.74885	-0.51344	0.728525	0.841967	0.498689
6.28333	0.749672	1.62197	1.08459	-0.79885	-0.48344	0.668525	0.761967	0.478689
6.3	0.769672	1.61197	0.98459	-1.18885	-0.39344	0.588525	0.541967	0.398689
6.31667	0.699672	1.62197	0.87459	-1.32885	-0.57344	0.328525	0.531967	0.348689
6.33333	0.399672	1.61197	0.89459	-1.22885	-0.71344	0.218525	0.731967	0.418689
6.35	0.229672	1.58197	0.83459	-1.08885	-0.69344	0.168525	0.801967	0.528689
6.36667	0.159672	1.50197	0.75459	-1.07885	-0.63344	-0.04148	0.841967	0.558689
6.38333	0.199672	1.47197	0.68459	-1.16885	-0.58344	-0.16148	0.901967	0.498689
6.4	0.399672	1.48197	0.58459	-1.28885	-0.56344	-0.17148	0.991967	0.558689
6.41667	0.679672	1.43197	0.29459	-1.10885	-0.54344	-0.25148	1.01197	0.658689
6.43333	0.849672	1.30197	-0.10541	-0.94885	-0.50344	-0.40148	0.991967	0.598689
6.45	0.919672	1.21197	-0.25541	-1.00885	-0.49344	-0.51148	0.961967	0.658689
6.46667	0.969672	1.13197	-0.28541	-0.92885	-0.49344	-0.62148	0.981967	0.838689
6.48333	0.979672	1.06197	-0.26541	-0.67885	-0.49344	-0.82148	0.981967	0.948689
6.5	0.969672	0.941967	-0.35541	-0.74885	-0.48344	-0.85148	1.00197	1.01869
6.51667	0.879672	0.911967	-0.51541	-0.74885	-0.45344	-0.77148	1.19197	1.27869
6.53333	0.789672	0.881967	-0.54541	-0.38885	-0.37344	-0.72148	1.17197	1.12869
6.55	0.659672	0.661967	-0.44541	-0.42885	-0.38344	-0.77148	1.11197	0.938689
6.56667	0.509672	0.731967	-0.37541	-0.19885	-0.41344	-0.74148	0.951967	0.838689
6.58333	0.379672	0.751967	-0.61541	-0.02885	-0.49344	-0.78148	0.831967	0.688689
6.6	0.489672	0.741967	-0.89541	-0.02885	-0.73344	-0.76148	0.801967	0.688689
6.61667	0.519672	0.611967	-0.89541	-0.05885	-0.85344	-0.68148	0.771967	0.748689
6.63333	0.559672	0.491967	-0.88541	-0.10885	-0.81344	-0.59148	0.781967	0.808689
6.65	0.649672	0.441967	-0.94541	-0.16885	-0.81344	-0.51148	0.821967	0.858689
6.66667	0.749672	0.361967	-1.08541	-0.25885	-0.76344	-0.40148	0.841967	0.828689
6.68333	0.809672	0.201967	-1.21541	-0.32885	-0.71344	-0.26148	0.881967	0.848689
6.7	0.879672	0.091967	-1.18541	-0.35885	-0.77344	-0.17148	0.871967	0.908689
6.71667	0.919672	-0.05803	-1.16541	-0.49885	-0.93344	-0.09148	0.851967	0.918689
6.73333	0.919672	-0.21803	-1.21541	-0.61885	-1.05344	-0.01148	0.831967	0.828689
6.75	0.949672	-0.30803	-1.21541	-0.69885	-1.23344	-0.01148	0.831967	0.638689
6.76667	0.919672	-0.42803	-1.29541	-0.66885	-1.61344	0.038525	0.851967	0.678689
6.78333	0.989672	-0.54803	-1.40541	-0.63885	-1.71344	0.218525	0.791967	0.768689
6.8	1.29967	-0.63803	-1.38541	-0.67885	-1.81344	0.288525	0.781967	0.848689
6.81667	1.48967	-0.64803	-1.23541	-0.72885	-1.87344	0.318525	0.711967	1.06869
6.83333	1.70967	-0.64803	-1.22541	-0.73885	-1.90344	0.328525	0.631967	1.33869
6.85	1.78967	-0.59803	-1.13541	-0.74885	-1.99344	0.348525	0.661967	1.38869
6.86667	1.78967	-0.49803	-0.86541	-0.73885	-2.09344	0.448525	0.731967	1.28869
6.88333	1.82967	-0.46803	-0.65541	-0.77885	-2.13344	0.538525	0.851967	1.18869
6.9	1.83967	-0.64803	-0.71541	-0.84885	-2.15344	0.648525	0.891967	0.998689
6.91667	1.75967	-0.76803	-0.77541	-0.86885	-2.18344	0.688525	0.871967	0.858689
6.93333	1.73967	-0.85803	-0.85541	-0.68885	-2.13344	0.668525	0.811967	0.868689
6.95	1.73967	-0.88803	-0.83541	-0.22885	-2.00344	0.578525	0.721967	0.858689
6.96667	1.62967	-0.94803	-0.67541	-0.22885	-2.03344	0.538525	0.711967	0.768689
6.98333	1.46967	-0.96803	-0.54541	-0.18885	-2.09344	0.548525	0.721967	0.738689
7	1.36967	-1.00803	-0.35541	-0.06885	-2.16344	0.548525	0.671967	0.638689
7.01667	1.30967	-1.13803	-0.24541	0.091148	-2.21344	0.528525	0.681967	0.608689
7.03333	1.24967	-1.20803	-0.16541	0.121148	-2.23344	0.508525	0.851967	0.798689
7.05	1.28967	-1.25803	-0.13541	0.091148	-2.30344	0.468525	1.13197	0.988689
7.06667	1.43967	-1.15803	-0.12541	0.061148	-2.36344	0.388525	1.19197	1.06869
7.08333	1.50967	-0.99803	-0.07541	-0.07885	-2.35344	0.368525	1.14197	1.01869
7.1	1.59967	-1.02803	-0.00541	-0.67885	-2.36344	0.378525	1.06197	0.998689
7.11667	1.60967	-1.01803	0.07459	-1.14885	-2.46344	0.388525	1.19197	0.968689
7.13333	1.41967	-0.95803	0.16459	-1.12885	-2.50344	0.388525	1.28197	0.878689
7.15	1.33967	-0.99803	0.25459	-1.06885	-2.44344	0.408525	1.32197	0.818689
7.16667	1.36967	-0.93803	0.28459	-0.85885	-2.43344	0.468525	1.34197	0.968689
7.18333	1.25967	-0.78803	0.25459	-0.90885	-2.52344	0.518525	1.39197	1.04869
7.2	1.19967	-0.71803	-0.04541	-1.04885	-2.49344	0.518525	1.50197	0.938689
7.21667	1.35967	-0.86803	-0.48541	-0.98885	-2.48344	0.488525	1.56197	0.808689
7.23333	1.42967	-0.92803	-0.50541	-0.91885	-2.46344	0.418525	1.55197	0.848689
7.25	1.35967	-1.00803	-0.48541	-0.96885	-2.41344	0.378525	1.40197	0.928689
7.26667	1.31967	-1.07803	-0.45541	-1.03885	-2.39344	0.378525	1.34197	0.918689
7.28333	1.30967	-1.13803	-0.50541	-1.21885	-2.37344	0.408525	1.36197	0.838689
7.3	1.26967	-1.13803	-0.53541	-1.89885	-2.35344	0.498525	1.43197	0.708689
7.31667	1.23967	-1.12803	-0.35541	-2.37885	-2.31344	0.508525	1.57197	0.588689
7.33333	1.27967	-1.10803	-0.36541	-2.62885	-2.26344	0.528525	1.62197	0.518689
7.35	1.30967	-1.09803	-0.23541	-2.70885	-2.20344	0.618525	1.65197	0.518689
7.36667	1.32967	-1.07803	-0.00541	-2.78885	-2.25344	0.608525	1.67197	0.588689
7.38333	1.38967	-1.03803	-0.04541	-2.81885	-2.30344	0.578525	1.75197	0.648689
7.4	1.33967	-1.00803	-0.17541	-2.75885	-2.33344	0.578525	1.82197	0.718689
7.41667	1.32967	-0.99803	-0.20541	-2.71885	-2.31344	0.628525	1.75197	0.798689
7.43333	1.42967	-0.94803	-0.21541	-2.65885	-2.26344	0.748525	1.72197	0.798689
7.45	1.46967	-1.01803	-0.26541	-2.69885	-2.21344	0.748525	1.66197	0.758689
7.46667	1.45967	-1.05803	-0.24541	-2.74885	-2.14344	0.728525	1.62197	0.788689
7.48333	1.43967	-0.98803	-0.18541	-2.81885	-2.08344	0.798525	1.65197	0.938689
7.5	1.42967	-0.94803	-0.19541	-2.79885	-2.03344	0.918525	1.77197	1.00869
7.51667	1.36967	-0.87803	-0.11541	-2.20885	-1.97344	1.24853	1.90197	0.988689
7.53333	1.37967	-0.77803	-0.01541	-1.95885	-1.85344	1.33852	1.80197	0.978689
7.55	1.37967	-0.60803	0.03459	-1.94885	-1.73344	1.33852	1.49197	1.02869
7.56667	1.33967	-0.39803	0.13459	-1.88885	-1.63344	1.36852	1.36197	1.13869
7.58333	1.20967	-0.13803	0.19459	-1.80885	-1.49344	1.37853	1.40197	1.27869
7.6	1.05967	-0.14803	0.19459	-1.72885	-1.42344	1.32852	1.54197	1.41869
7.61667	1.05967	-0.27803	0.27459	-1.63885	-1.36344	1.28852	1.66197	1.37869
7.63333	1.20967	-0.67803	0.53459	-1.50885	-1.29344	1.26852	1.53197	1.28869
7.65	1.24967	-0.81803	0.57459	-1.44885	-1.21344	1.24853	1.41197	1.28869
7.66667	1.33967	-0.47803	0.57459	-1.42885	-1.15344	1.24853	1.29197	1.25869
7.68333	1.44967	-0.18803	0.57459	-1.38885	-1.10344	1.21853	1.25197	1.20869
7.7	1.47967	-0.03803	0.38459	-1.32885	-1.02344	1.15853	1.43197	1.18869
7.71667	1.37967	0.041967	0.17459	-1.38885	-0.93344	1.18853	1.50197	1.20869
7.73333	1.17967	0.061967	0.23459	-1.53885	-0.90344	1.38853	1.53197	1.23869
7.75	1.12967	0.051967	0.34459	-1.78885	-0.86344	1.40853	1.68197	1.24869
7.76667	1.18967	0.101967	0.38459	-2.01885	-0.88344	1.38853	1.84197	1.18869
7.78333	1.05967	0.101967	0.47459	-1.96885	-0.90344	1.37853	1.93197	1.06869
7.8	0.999672	0.031967	0.57459	-1.69885	-0.88344	1.33852	2.01197	1.00869
7.81667	1.18967	-0.04803	0.72459	-1.62885	-0.84344	1.26852	1.99197	0.958689
7.83333	1.36967	-0.07803	0.81459	-1.54885	-0.60344	1.02852	1.89197	0.868689
7.85	1.39967	-0.10803	0.93459	-1.52885	-0.46344	0.888525	1.77197	0.758689
7.86667	1.43967	-0.27803	1.10459	-1.61885	-0.23344	0.928525	1.63197	0.618689
7.88333	1.45967	-0.37803	1.10459	-1.52885	-0.11344	0.988525	1.59197	0.548689
7.9	1.04967	-0.43803	0.98459	-1.37885	-0.00344	0.998525	1.40197	0.548689
7.91667	1.03967	-0.36803	0.87459	-1.20885	0.246557	0.998525	1.28197	0.518689
7.93333	1.15967	-0.24803	0.83459	-1.18885	0.316557	1.05852	1.24197	0.428689
7.95	1.15967	-0.23803	0.78459	-1.11885	0.326557	1.13853	1.09197	0.388689
7.96667	1.18967	-0.12803	0.60459	-1.03885	0.406557	1.19853	1.03197	0.378689
7.98333	1.17967	-0.02803	0.38459	-1.02885	0.486557	1.24853	0.941967	0.408689
8	1.11967	0.041967	0.24459	-1.03885	0.516557	1.20853	0.741967	0.398689
8.01667	0.929672	0.181967	0.19459	-1.00885	0.466557	0.888525	0.691967	0.378689
8.03333	0.199672	0.241967	0.20459	-0.97885	0.446557	0.598525	0.681967	0.398689
8.05	-0.08033	0.281967	0.16459	-1.01885	0.466557	0.628525	0.681967	0.388689
8.06667	-0.09033	0.311967	0.09459	-1.18885	0.386557	0.808525	0.691967	0.438689
8.08333	0.049672	0.321967	0.00459	-1.19885	0.256557	0.788525	0.711967	0.438689
8.1	0.139672	0.301967	-0.12541	-1.15885	0.196557	0.628525	0.711967	0.428689
8.11667	0.269672	0.321967	-0.34541	-1.19885	0.106557	0.628525	0.661967	0.438689
8.13333	0.339672	0.391967	-0.58541	-1.31885	-0.04344	0.608525	0.641967	0.428689
8.15	0.449672	0.431967	-0.81541	-1.41885	-0.15344	0.868525	0.701967	0.428689
8.16667	0.539672	0.381967	-0.87541	-1.40885	-0.15344	0.868525	0.761967	0.508689
8.18333	0.589672	0.281967	-0.97541	-1.38885	-0.15344	0.998525	0.781967	0.538689
8.2	0.659672	0.221967	-1.00541	-1.34885	-0.14344	1.17853	0.611967	0.548689
8.21667	0.949672	0.211967	-1.09541	-1.33885	-0.15344	1.10852	0.611967	0.558689
8.23333	0.899672	0.351967	-1.17541	-1.36885	-0.20344	1.19853	0.801967	0.628689
8.25	0.209672	0.571967	-1.16541	-1.38885	-0.24344	1.43853	0.811967	0.658689
8.26667	0.059672	0.631967	-1.14541	-1.36885	-0.26344	1.47853	0.861967	0.658689
8.28333	0.109672	0.651967	-0.99541	-1.36885	-0.25344	1.45853	0.901967	0.698689
8.3	0.159672	0.681967	-0.78541	-1.40885	-0.20344	1.43853	0.941967	0.758689
8.31667	0.139672	0.701967	-0.66541	-1.31885	-0.19344	1.36852	0.981967	0.848689
8.33333	0.139672	0.671967	-0.66541	-1.21885	-0.20344	1.26852	1.03197	0.918689
8.35	0.009672	0.561967	-0.77541	-0.97885	-0.20344	1.17853	1.02197	1.06869
8.36667	-0.01033	0.651967	-0.81541	-0.85885	-0.30344	1.12853	1.08197	0.998689
8.38333	-0.03033	0.781967	-0.87541	-0.68885	-0.44344	1.16853	1.16197	0.648689
8.4	-0.06033	0.661967	-1.04541	-0.60885	-0.53344	1.17853	1.20197	0.598689
8.41667	-0.05033	0.481967	-1.09541	-0.64885	-0.49344	1.09852	1.25197	0.628689
8.43333	-0.03033	0.491967	-1.06541	-0.85885	-0.44344	0.958525	1.29197	0.668689
8.45	-0.08033	0.561967	-1.02541	-0.89885	-0.41344	0.858525	1.22197	0.808689
8.46667	-0.19033	0.701967	-1.03541	-0.85885	-0.47344	0.868525	1.18197	0.978689
8.48333	-0.16033	0.781967	-1.08541	-0.89885	-0.53344	0.678525	1.16197	1.03869
8.5	-0.13033	0.881967	-1.00541	-1.01885	-0.51344	0.398525	1.15197	1.13869
8.51667	-0.16033	0.921967	-0.89541	-1.22885	-0.49344	0.228525	1.15197	1.23869
8.53333	-0.14033	0.851967	-0.83541	-1.18885	-0.46344	0.178525	1.13197	1.38869
8.55	-0.15033	0.651967	-0.79541	-0.97885	-0.39344	0.198525	1.12197	0.998689
8.56667	-0.20033	0.711967	-0.71541	-0.85885	-0.43344	0.168525	1.21197	0.678689
8.58333	-0.18033	0.631967	-0.65541	-0.83885	-0.69344	0.138525	1.26197	0.428689
8.6	-0.09033	0.441967	-0.56541	-0.79885	-0.87344	0.118525	1.23197	0.588689
8.61667	-0.05033	-0.11803	-0.41541	-1.05885	-0.98344	0.018525	1.22197	0.628689
8.63333	0.119672	-0.37803	-0.30541	-1.37885	-1.23344	-0.05148	1.27197	0.648689
8.65	0.539672	-0.54803	-0.22541	-1.52885	-1.33344	-0.01148	1.38197	0.838689
8.66667	0.989672	-0.50803	-0.20541	-1.59885	-1.43344	-0.08148	1.60197	0.898689
8.68333	1.06967	-0.21803	-0.21541	-1.62885	-1.46344	-0.44148	1.68197	0.798689
8.7	0.989672	-0.14803	-0.12541	-1.78885	-1.51344	-0.63148	1.66197	0.618689
8.71667	0.829672	-0.19803	0.01459	-1.76885	-1.61344	-0.59148	1.64197	0.528689
8.73333	0.609672	-0.38803	0.17459	-1.63885	-1.65344	-0.11148	1.65197	0.398689
8.75	0.599672	-0.48803	0.32459	-1.71885	-1.74344	0.098525	1.66197	0.158689
8.76667	0.609672	-0.55803	0.31459	-1.77885	-1.77344	0.048525	1.68197	0.048689
8.78333	0.329672	-0.44803	0.37459	-1.79885	-1.70344	-0.05148	1.58197	0.068689
8.8	0.269672	-0.58803	0.38459	-1.88885	-1.54344	-0.06148	1.51197	0.038689
8.81667	0.489672	-0.76803	0.39459	-1.80885	-1.41344	-0.08148	1.53197	-0.05131
8.83333	0.529672	-0.92803	0.56459	-1.70885	-1.34344	-0.04148	1.52197	-0.14131
8.85	0.359672	-0.89803	0.46459	-1.71885	-1.32344	-0.00148	1.53197	-0.19131
8.86667	0.229672	-0.72803	0.17459	-1.73885	-1.31344	0.048525	1.58197	-0.21131
8.88333	-0.21033	-0.81803	0.32459	-1.86885	-1.33344	0.088525	1.59197	-0.22131
8.9	-0.19033	-0.89803	0.31459	-1.80885	-1.42344	0.138525	1.58197	-0.24131
8.91667	0.299672	-0.94803	0.30459	-1.78885	-1.54344	0.178525	1.60197	-0.30131
8.93333	0.849672	-1.01803	0.26459	-1.79885	-1.66344	0.208525	1.65197	-0.34131
8.95	1.17967	-0.98803	0.08459	-1.78885	-1.69344	0.228525	1.67197	-0.40131
8.96667	1.35967	-0.82803	0.04459	-1.67885	-1.80344	0.128525	1.64197	-0.43131
8.98333	1.43967	-0.69803	0.18459	-1.46885	-1.87344	0.068525	1.54197	-0.48131
9	1.60967	-0.71803	0.26459	-1.39885	-1.69344	0.098525	1.40197	-0.51131
9.01667	1.39967	-0.84803	0.31459	-1.39885	-1.58344	0.118525	1.35197	-0.42131
9.03333	1.10967	-0.87803	0.38459	-1.30885	-1.61344	0.168525	1.28197	-0.27131
9.05	1.21967	-0.86803	0.23459	-1.33885	-1.64344	0.378525	1.21197	-0.11131
9.06667	1.23967	-0.85803	0.05459	-1.50885	-1.69344	0.548525	1.31197	-0.00131
9.08333	1.18967	-0.83803	-0.09541	-1.42885	-1.62344	0.598525	1.37197	0.058689
9.1	1.17967	-0.76803	-0.28541	-1.18885	-1.55344	0.648525	1.42197	0.098689
9.11667	1.16967	-0.68803	-0.47541	-1.05885	-1.49344	0.598525	1.47197	0.178689
9.13333	1.18967	-0.74803	-0.51541	-1.11885	-1.54344	0.788525	1.50197	0.198689
9.15	1.16967	-0.83803	-0.42541	-1.16885	-1.55344	0.978525	1.54197	0.198689
9.16667	1.13967	-0.88803	-0.50541	-1.19885	-1.41344	1.06852	1.49197	0.228689
9.18333	1.09967	-0.90803	-0.82541	-1.13885	-1.15344	1.21853	1.24197	0.398689
9.2	1.06967	-0.87803	-0.90541	-1.05885	-1.05344	1.34852	1.21197	0.428689
9.21667	1.04967	-0.66803	-0.80541	-0.90885	-1.12344	1.47853	1.37197	0.438689
9.23333	1.05967	-0.35803	-0.68541	-0.76885	-1.20344	1.42853	1.40197	0.328689
9.25	1.16967	-0.46803	-0.50541	-0.72885	-1.30344	1.36852	1.02197	0.238689
9.26667	1.25967	-0.83803	-0.66541	-0.69885	-1.48344	1.26852	0.971967	0.308689
9.28333	1.20967	-0.87803	-0.85541	-0.71885	-1.55344	0.888525	1.16197	0.298689
9.3	1.14967	-0.86803	-0.84541	-0.75885	-1.57344	0.208525	1.38197	0.208689
9.31667	1.04967	-0.83803	-0.70541	-0.84885	-1.60344	0.058525	1.40197	0.228689
9.33333	0.799672	-0.81803	-0.56541	-0.88885	-1.54344	0.038525	1.51197	0.428689
9.35	0.589672	-0.73803	-0.52541	-0.86885	-1.35344	-0.01148	1.71197	0.558689
9.36667	0.569672	-0.72803	-0.82541	-0.79885	-1.25344	-0.16148	1.62197	0.618689
9.38333	0.459672	-0.75803	-0.79541	-0.77885	-1.13344	-0.24148	1.67197	0.648689
9.4	0.119672	-0.81803	-0.66541	-0.77885	-1.00344	-0.27148	1.82197	0.748689
9.41667	0.259672	-0.90803	-0.59541	-0.78885	-0.97344	-0.19148	1.94197	0.808689
9.43333	0.459672	-0.97803	-0.60541	-0.90885	-0.93344	-0.17148	2.03197	0.748689
9.45	0.449672	-1.15803	-0.59541	-0.84885	-0.91344	-0.17148	2.06197	0.658689
9.46667	0.549672	-1.19803	-0.55541	-0.78885	-0.86344	-0.17148	2.09197	0.538689
9.48333	0.619672	-1.23803	-0.50541	-0.75885	-0.75344	-0.27148	2.03197	0.388689
9.5	0.829672	-1.35803	-0.45541	-0.71885	-0.67344	-0.40148	1.87197	0.278689
9.51667	1.00967	-1.41803	-0.23541	-1.03885	-0.56344	-0.43148	1.68197	0.238689
9.53333	0.929672	-1.44803	-0.18541	-1.45885	-0.47344	-0.44148	1.64197	-0.11131
9.55	0.859672	-1.43803	-0.39541	-1.83885	-0.51344	-0.47148	1.68197	-0.34131
9.56667	0.819672	-1.43803	-0.43541	-1.87885	-0.62344	-0.41148	1.85197	-0.29131
9.58333	0.739672	-1.50803	-0.29541	-1.70885	-0.70344	-0.30148	2.02197	-0.22131
9.6	0.889672	-1.22803	-0.19541	-1.59885	-0.72344	-0.17148	2.16197	-0.17131
9.61667	0.969672	-1.14803	-0.23541	-1.56885	-0.77344	-0.07148	2.17197	-0.27131
9.63333	0.989672	-1.19803	-0.41541	-1.30885	-0.85344	0.028525	2.12197	-0.31131
9.65	0.959672	-1.25803	-0.57541	-1.01885	-0.92344	0.028525	2.14197	-0.24131
9.66667	1.04967	-1.39803	-0.52541	-0.85885	-1.10344	-0.14148	2.08197	-0.22131
9.68333	1.06967	-1.70803	-0.27541	-0.63885	-1.17344	-0.22148	2.08197	-0.34131
9.7	0.719672	-1.83803	-0.18541	-0.57885	-1.03344	-0.45148	2.07197	-0.34131
9.71667	0.719672	-1.91803	-0.21541	-0.58885	-0.86344	-0.60148	2.16197	-0.28131
9.73333	0.829672	-1.94803	-0.39541	-0.79885	-0.77344	-0.51148	2.20197	-0.17131
9.75	1.15967	-2.06803	-0.61541	-0.74885	-0.80344	-0.45148	2.16197	-0.09131
9.76667	1.18967	-2.15803	-0.49541	-0.86885	-0.96344	-0.54148	2.06197	0.038689
9.78333	1.18967	-2.03803	-0.52541	-0.79885	-1.08344	-0.68148	1.93197	0.258689
9.8	1.14967	-1.92803	-0.60541	-0.73885	-1.23344	-0.77148	1.76197	0.418689
9.81667	1.23967	-1.90803	-0.34541	-0.75885	-1.36344	-0.82148	1.52197	0.498689
9.83333	1.16967	-1.83803	-0.09541	-0.78885	-1.42344	-0.76148	1.30197	0.328689
9.85	1.13967	-1.81803	-0.09541	-0.76885	-1.30344	-0.56148	1.38197	0.168689
9.86667	1.12967	-1.78803	0.13459	-0.74885	-1.30344	-0.71148	1.41197	-0.03131
9.88333	1.09967	-1.69803	0.02459	-0.82885	-1.35344	-0.89148	1.44197	-0.03131
9.9	1.04967	-1.59803	-0.32541	-0.85885	-1.39344	-0.90148	1.41197	0.178689
9.91667	1.07967	-1.68803	-0.41541	-0.87885	-1.44344	-0.99148	1.33197	0.318689
9.93333	1.03967	-1.68803	-0.36541	-0.93885	-1.49344	-1.04148	1.27197	0.148689
9.95	1.02967	-1.72803	-0.33541	-1.15885	-1.59344	-0.86148	1.15197	-0.03131
9.96667	1.07967	-1.67803	-0.46541	-1.10885	-1.76344	-0.78148	1.00197	0.108689
9.98333	1.01967	-1.66803	-0.40541	-0.57885	-1.78344	-0.66148	0.931967	0.148689
10	1.01967	-1.71803	-0.15541	-0.51885	-1.72344	-0.59148	0.921967	0.228689
10.0167	1.00967	-1.70803	-0.08541	-0.48885	-1.64344	-0.71148	0.681967	0.188689
10.0333	0.819672	-1.65803	-0.08541	-0.64885	-1.61344	-0.75148	0.621967	0.168689
10.05	0.839672	-1.65803	-0.17541	-0.83885	-1.59344	-0.66148	0.611967	0.188689
10.0667	1.19967	-1.68803	-0.23541	-0.62885	-1.54344	-0.45148	0.621967	0.258689
10.0833	1.45967	-1.66803	-0.17541	-0.47885	-1.57344	-0.38148	0.711967	0.468689
10.1	1.39967	-1.57803	-0.18541	-0.46885	-1.74344	-0.30148	0.741967	0.328689
10.1167	1.08967	-1.09803	0.05459	-0.53885	-1.94344	-0.22148	0.731967	0.158689
10.1333	0.889672	-1.03803	0.36459	-0.72885	-1.98344	-0.14148	0.571967	-0.11131
10.15	0.609672	-1.34803	0.44459	-0.60885	-1.92344	-0.08148	0.381967	-0.34131
10.1667	0.269672	-1.46803	-0.02541	-0.47885	-1.80344	-0.03148	0.511967	-0.46131
10.1833	-0.11033	-1.42803	0.03459	-0.40885	-1.72344	0.078525	0.721967	-0.49131
10.2	-0.29033	-1.44803	0.07459	-0.30885	-1.64344	0.178525	0.831967	-0.49131
10.2167	-0.35033	-1.29803	-0.00541	-0.00885	-1.66344	0.278525	0.991967	-0.41131
10.2333	-0.32033	-1.04803	-0.17541	0.091148	-1.78344	0.388525	0.961967	-0.20131
10.25	-0.06033	-0.98803	-0.35541	0.051148	-1.83344	0.458525	1.10197	-0.01131
10.2667	0.109672	-1.08803	-0.25541	0.001148	-1.84344	0.528525	1.26197	0.098689
10.2833	0.379672	-1.10803	0.01459	-0.37885	-1.91344	0.718525	1.32197	0.218689
10.3	0.769672	-1.17803	0.34459	-0.80885	-1.97344	0.828525	1.36197	0.208689
10.3167	1.19967	-1.24803	0.43459	-0.83885	-1.90344	0.858525	1.61197	0.098689
10.3333	1.58967	-1.24803	0.17459	-0.91885	-1.80344	0.818525	1.67197	0.178689
10.35	1.76967	-1.19803	-0.53541	-0.84885	-1.85344	0.798525	0.911967	0.248689
10.3667	1.64967	-1.15803	-0.51541	-0.87885	-1.91344	0.818525	0.591967	0.098689
10.3833	1.39967	-1.21803	0.05459	-0.95885	-1.95344	0.918525	0.391967	0.018689
10.4	1.39967	-1.22803	0.03459	-0.63885	-1.96344	0.998525	0.321967	0.008689
10.4167	1.27967	-1.17803	-0.14541	-0.57885	-2.01344	0.958525	0.281967	-0.02131
10.4333	1.08967	-1.17803	0.11459	-0.64885	-2.03344	0.958525	0.131967	-0.07131
10.45	0.969672	-1.07803	0.35459	-0.77885	-1.90344	0.918525	0.071967	-0.09131
10.4667	0.669672	-0.98803	0.27459	-0.72885	-1.94344	0.848525	0.081967	-0.12131
10.4833	0.249672	-1.03803	0.17459	-0.46885	-2.01344	0.888525	0.291967	-0.05131
10.5	-0.00033	-1.09803	0.00459	-0.86885	-2.09344	1.08852	0.311967	0.048689
10.5167	-0.22033	-0.93803	-0.32541	-1.94885	-2.10344	1.12853	0.251967	0.318689
10.5333	-0.37033	-0.91803	-0.62541	-2.11885	-2.19344	1.09852	0.191967	0.438689
10.55	-0.39033	-0.95803	-0.73541	-2.16885	-2.16344	1.14853	0.141967	0.558689
10.5667	-0.10033	-0.98803	-0.48541	-2.41885	-2.00344	1.26852	0.231967	0.798689
10.5833	0.109672	-0.99803	-0.32541	-2.10885	-1.87344	1.25852	0.281967	0.958689
10.6	0.359672	-1.06803	-0.28541	-1.54885	-1.96344	1.18853	0.311967	0.868689
10.6167	0.499672	-1.30803	-0.04541	-1.06885	-2.09344	1.20853	0.421967	0.918689
10.6333	0.589672	-1.40803	0.13459	-0.79885	-2.23344	1.35852	0.491967	0.908689
10.65	0.789672	-1.36803	-0.04541	-1.03885	-2.36344	1.40853	0.491967	0.668689
10.6667	1.25967	-1.46803	-0.20541	-1.23885	-2.29344	1.33852	0.481967	0.318689
10.6833	1.22967	-1.60803	-0.32541	-0.86885	-2.17344	1.30852	0.531967	0.038689
10.7	0.649672	-1.67803	-0.26541	-0.84885	-2.05344	1.37853	0.501967	-0.12131
10.7167	0.419672	-1.68803	-0.31541	-0.87885	-2.01344	1.36852	0.401967	-0.37131
10.7333	0.289672	-1.65803	-0.51541	-0.89885	-1.94344	1.36852	0.371967	-0.67131
10.75	0.249672	-1.77803	-0.61541	-1.29885	-1.82344	1.32852	0.271967	-0.79131
10.7667	0.319672	-1.88803	-0.64541	-1.36885	-1.76344	1.39853	0.031967	-0.70131
10.7833	0.609672	-1.90803	-0.58541	-1.25885	-1.75344	1.59852	-0.17803	-0.34131
10.8	0.839672	-1.86803	-0.29541	-1.15885	-1.76344	1.60852	-0.20803	-0.20131
10.8167	0.969672	-1.94803	-0.18541	-0.80885	-1.78344	1.50852	0.071967	-0.19131
10.8333	1.27967	-2.08803	0.02459	-0.61885	-1.77344	1.49853	1.03197	-0.15131
10.85	1.28967	-2.22803	0.06459	-0.30885	-1.82344	1.47853	1.69197	-0.10131
10.8667	1.17967	-2.18803	-0.03541	-0.25885	-1.98344	1.43853	2.05197	-0.06131
10.8833	1.12967	-2.25803	-0.05541	-0.55885	-2.09344	1.24853	2.21197	-0.09131
10.9	1.17967	-2.31803	-0.24541	-0.95885	-2.17344	1.11852	2.37197	-0.12131
10.9167	0.949672	-2.32803	-0.14541	-1.04885	-2.21344	1.01852	2.44197	-0.11131
10.9333	0.739672	-2.24803	-0.07541	-1.07885	-2.14344	0.898525	2.46197	-0.17131
10.95	0.719672	-2.12803	0.03459	-1.11885	-2.15344	0.768525	2.59197	-0.29131
10.9667	0.979672	-2.13803	0.17459	-1.33885	-2.10344	0.538525	2.87197	-0.33131
10.9833	1.30967	-2.10803	-0.12541	-1.36885	-2.04344	0.378525	2.96197	-0.18131
11	1.40967	-2.13803	-0.34541	-0.95885	-2.00344	0.148525	2.81197	0.038689
11.0167	1.48967	-2.19803	-0.27541	-0.46885	-2.00344	-0.00148	2.69197	0.178689
11.0333	1.29967	-1.97803	-0.10541	-0.15885	-2.03344	-0.03148	2.59197	0.338689
11.05	1.02967	-2.03803	0.09459	-0.01885	-1.97344	-0.13148	2.49197	0.388689
11.0667	0.979672	-2.27803	-0.00541	-0.02885	-1.97344	-0.22148	2.31197	0.278689
11.0833	0.879672	-2.30803	-0.15541	0.061148	-2.00344	-0.36148	2.04197	0.138689
11.1	0.929672	-2.25803	-0.15541	0.271148	-2.04344	-0.39148	1.71197	0.048689
11.1167	1.09967	-2.47803	-0.09541	0.311148	-2.10344	-0.35148	1.34197	-0.00131
11.1333	1.65967	-2.48803	-0.13541	0.191148	-2.11344	-0.43148	1.14197	-0.05131
11.15	1.78967	-2.42803	-0.17541	0.051148	-1.99344	-0.39148	1.06197	0.058689
11.1667	1.76967	-2.43803	-0.18541	-0.09885	-1.87344	-0.34148	1.03197	0.168689
11.1833	1.66967	-2.43803	-0.25541	-0.23885	-1.87344	-0.38148	0.871967	0.278689
11.2	1.52967	-2.51803	-0.19541	-0.37885	-1.94344	-0.43148	1.00197	0.308689
11.2167	1.38967	-2.48803	-0.09541	-0.59885	-1.87344	-0.41148	1.15197	0.348689
11.2333	1.13967	-2.35803	-0.07541	-0.63885	-1.79344	-0.32148	1.04197	0.428689
11.25	1.21967	-2.01803	-0.20541	-0.67885	-1.88344	-0.37148	0.891967	0.338689
11.2667	1.43967	-1.82803	-0.29541	-0.71885	-1.96344	-0.43148	0.951967	0.138689
11.2833	1.75967	-1.77803	-0.17541	-0.68885	-1.95344	-0.60148	0.961967	-0.20131
11.3	1.79967	-1.66803	-0.26541	-0.59885	-1.98344	-0.67148	1.02197	-0.36131
11.3167	1.55967	-1.60803	-0.35541	-0.59885	-1.97344	-0.59148	1.04197	-0.18131
11.3333	1.45967	-1.55803	-0.55541	-0.38885	-1.91344	-0.64148	1.00197	0.048689
11.35	1.34967	-1.50803	-0.51541	-0.50885	-1.86344	-0.75148	0.991967	0.118689
11.3667	1.29967	-1.44803	-0.58541	-0.61885	-1.79344	-0.77148	0.931967	0.068689
11.3833	1.00967	-1.38803	-0.79541	-0.91885	-1.76344	-0.85148	0.521967	0.318689
11.4	0.949672	-1.37803	-0.78541	-1.53885	-1.79344	-0.89148	0.351967	0.638689
11.4167	1.26967	-1.29803	-0.72541	-1.88885	-1.81344	-0.89148	0.281967	0.578689
11.4333	1.38967	-1.20803	-0.73541	-2.06885	-1.72344	-0.97148	0.221967	0.558689
11.45	1.17967	-1.05803	-0.97541	-2.14885	-1.67344	-0.96148	0.221967	0.248689
11.4667	1.05967	-0.89803	-1.04541	-2.15885	-1.71344	-0.94148	0.241967	0.018689
11.4833	1.17967	-0.74803	-0.78541	-2.19885	-1.76344	-0.82148	0.291967	-0.05131
11.5	1.06967	-0.73803	-0.55541	-2.15885	-1.86344	-0.78148	0.371967	-0.25131
11.5167	0.999672	-0.75803	-0.55541	-2.05885	-1.88344	-0.83148	0.411967	-0.36131
11.5333	0.909672	-0.78803	-0.57541	-1.92885	-1.96344	-0.95148	0.421967	-0.28131
11.55	0.659672	-0.76803	-0.71541	-1.79885	-2.06344	-0.93148	0.421967	-0.20131
11.5667	0.529672	-0.61803	-0.74541	-1.82885	-2.07344	-0.77148	0.381967	-0.12131
11.5833	0.349672	-0.47803	-0.67541	-1.87885	-2.04344	-0.70148	0.341967	0.088689
11.6	0.229672	-0.39803	-0.55541	-1.87885	-1.98344	-0.58148	0.341967	0.418689
11.6167	0.149672	-0.35803	-0.47541	-1.73885	-1.96344	-0.55148	0.381967	0.568689
11.6333	0.159672	-0.30803	-0.45541	-1.01885	-1.99344	-0.52148	0.411967	0.448689
11.65	0.159672	-0.27803	-0.49541	-0.72885	-1.97344	-0.53148	0.541967	0.348689
11.6667	0.319672	-0.26803	-0.48541	-0.62885	-2.01344	-0.39148	0.621967	-0.32131
11.6833	0.359672	-0.23803	-0.43541	-0.56885	-2.14344	-0.22148	0.541967	-0.70131
11.7	0.279672	-0.29803	-0.14541	-0.59885	-2.13344	-0.19148	0.421967	-0.85131
11.7167	0.369672	-0.38803	-0.14541	-0.69885	-2.05344	-0.18148	0.571967	-0.71131
11.7333	0.489672	-0.41803	-0.60541	-0.84885	-1.97344	-0.22148	0.491967	-0.45131
11.75	0.589672	-0.42803	-0.89541	-1.11885	-1.95344	-0.19148	0.401967	-0.35131
11.7667	0.589672	-0.28803	-0.91541	-0.75885	-1.96344	-0.12148	0.191967	-0.25131
11.7833	0.569672	-0.26803	-0.76541	-0.62885	-1.92344	0.028525	0.381967	-0.24131
11.8	0.789672	-0.29803	-0.55541	-0.64885	-1.83344	0.168525	0.581967	-0.20131
11.8167	0.929672	-0.27803	-0.22541	-0.74885	-1.79344	0.178525	0.521967	-0.09131
11.8333	1.12967	-0.29803	-0.15541	-1.01885	-1.77344	0.438525	0.651967	-0.26131
11.85	1.18967	-0.31803	-0.24541	-1.27885	-1.83344	0.448525	1.04197	-0.55131
11.8667	1.25967	-0.34803	-0.16541	-1.62885	-1.88344	0.458525	1.44197	-0.64131
11.8833	1.39967	-0.48803	-0.14541	-1.68885	-1.96344	0.438525	1.71197	-0.72131
11.9	1.42967	-0.50803	-0.10541	-1.70885	-2.05344	0.348525	2.12197	-0.77131
11.9167	1.39967	-0.47803	0.08459	-1.57885	-2.08344	0.188525	2.24197	-0.49131
11.9333	1.35967	-0.41803	0.11459	-1.65885	-2.04344	0.048525	2.27197	-0.25131
11.95	1.31967	-0.42803	0.01459	-1.52885	-2.04344	-0.09148	2.37197	-0.03131
11.9667	1.20967	-0.46803	0.19459	-1.02885	-1.97344	-0.19148	2.39197	-0.15131
11.9833	1.21967	-0.45803	0.48459	-1.35885	-1.82344	-0.18148	2.43197	-0.68131
12	1.27967	-0.43803	0.52459	-1.48885	-1.76344	-0.12148	2.49197	-0.80131

## Sheet: CalcaKO AMG517
Time	Calca+/+	Calca+/+	Calca+/+	Calca-/-	Calca-/-	Calca-/-	Calca-/-	Calca-/-	Calca-/-
	T995	U756	U989	T999	U001	U754	U755	U988	U990
-1	-0.2671	0.216776	-0.4706	0.868361	0.071093	0.190656	0.271311	-0.0829	0.122951
-0.98333	-0.11377	0.196776	-0.4506	0.905027	0.174426	0.110656	0.254645	-0.00623	0.136284
-0.96667	-0.1071	0.183443	-0.3906	0.861694	0.151093	0.067322	0.197978	0.110437	0.186284
-0.95	-0.1671	0.130109	-0.20727	0.731694	0.141093	0.057322	0.181311	0.16377	0.186284
-0.93333	-0.2271	0.076776	-0.11727	0.635027	0.154426	0.037322	0.337978	0.060437	0.162951
-0.91667	-0.26377	0.036776	-0.05393	0.625027	0.181093	-0.02601	0.391311	0.070437	0.219617
-0.9	-0.2571	0.050109	-0.05393	0.648361	0.164426	-0.08268	0.351311	0.117104	0.179617
-0.88333	-0.28044	0.053443	-0.1406	0.615027	0.14776	-0.10601	0.344645	0.147104	0.216284
-0.86667	-0.34377	0.123443	-0.1806	0.561694	0.141093	-0.11934	0.364645	0.160437	0.239617
-0.85	-0.2871	0.200109	-0.1606	0.498361	0.084426	-0.17268	0.351311	0.13377	0.186284
-0.83333	-0.27377	0.230109	-0.12727	0.385027	0.014426	-0.18934	0.354645	0.10377	0.159617
-0.81667	-0.27044	0.193443	-0.20393	0.251694	-0.01891	-0.19268	0.344645	0.137104	0.136284
-0.8	-0.15377	0.146776	-0.28393	0.071694	-0.07891	-0.20268	0.314645	0.29377	0.136284
-0.78333	-0.04377	0.070109	-0.3606	-0.03497	-0.10224	-0.13601	0.284645	0.35377	0.089617
-0.76667	0.00623	-0.08322	-0.34393	-0.13164	-0.12891	-0.08268	0.201311	0.267104	0.059617
-0.75	0.082896	-0.25656	-0.14393	-0.18164	-0.16557	-0.04934	0.077978	0.25377	0.059617
-0.73333	0.47623	-0.28322	-0.1206	-0.20497	-0.23224	-0.03601	0.011311	0.297104	0.042951
-0.71667	0.529563	-0.21322	0.006066	-0.21164	-0.28224	-0.02268	0.031311	0.29377	0.029617
-0.7	0.51623	-0.11989	0.086066	-0.24164	-0.25224	-0.04601	0.011311	0.177104	0.042951
-0.68333	0.49623	-0.01322	0.236066	-0.24831	-0.17557	-0.06601	-0.08536	0.13377	0.112951
-0.66667	0.319563	0.056776	0.399399	-0.22497	-0.08224	-0.07601	-0.12869	0.150437	-0.02705
-0.65	0.12623	0.026776	0.476066	-0.17497	0.021093	-0.03268	-0.03202	0.130437	-0.08038
-0.63333	0.202896	0.096776	0.502732	-0.23164	-0.01891	-0.01934	0.131311	0.097104	-0.06372
-0.61667	0.302896	0.210109	0.506066	-0.21164	-0.02557	-0.10601	0.104645	0.090437	-0.09705
-0.6	0.139563	0.243443	0.526066	-0.27164	0.021093	-0.12601	-0.03202	0.097104	-0.16038
-0.58333	-0.0171	0.303443	0.439399	-0.34497	-0.00557	-0.11601	-0.11869	0.14377	-0.16372
-0.56667	-0.11377	0.273443	0.359399	-0.33497	0.024426	-0.10268	-0.16536	0.22377	-0.12038
-0.55	-0.09377	0.260109	0.249399	-0.35164	0.011093	-0.13934	-0.20869	0.090437	-0.04038
-0.53333	-0.10377	0.256776	0.059399	-0.37831	0.094426	-0.16268	-0.19202	0.06377	-0.11705
-0.51667	-0.0671	0.240109	-0.00393	-0.44831	0.151093	-0.11601	-0.18202	0.307104	-0.14372
-0.5	0.009563	0.250109	-0.01393	-0.48831	0.18776	-0.05934	-0.21536	0.45377	-0.12372
-0.48333	0.102896	0.223443	-0.05393	-0.49497	0.234426	-0.07601	-0.24536	0.480437	-0.20372
-0.46667	0.13623	0.193443	-0.17393	-0.32497	0.221093	-0.07601	-0.27536	0.490437	-0.23705
-0.45	0.182896	0.133443	-0.20727	-0.19164	0.171093	-0.05934	-0.21869	0.467104	-0.24038
-0.43333	0.209563	0.030109	-0.14727	-0.07497	0.074426	-0.01934	-0.09869	0.427104	-0.26372
-0.41667	0.18623	-0.01989	-0.1106	-0.01164	0.00776	0.040656	0.001311	0.45377	-0.28372
-0.4	0.109563	-0.04989	-0.14393	-0.04497	-0.06891	0.130656	0.051311	0.430437	-0.24038
-0.38333	0.15623	-0.02322	-0.15393	-0.14831	-0.15224	0.147322	0.087978	0.39377	-0.08372
-0.36667	0.149563	0.063443	-0.25393	-0.25831	-0.21891	0.147322	0.047978	0.390437	-0.05038
-0.35	0.15623	0.070109	-0.31727	-0.27497	-0.27891	0.030656	-0.04202	0.21377	-0.04705
-0.33333	0.25623	0.140109	-0.2806	-0.28497	-0.26557	0.047322	-0.00869	-0.1429	-0.15372
-0.31667	0.35623	0.220109	-0.1906	-0.30831	-0.22891	0.107322	0.007978	-0.25623	-0.12705
-0.3	0.339563	0.243443	-0.07393	-0.28497	-0.17224	0.140656	0.027978	-0.29956	0.066284
-0.28333	0.319563	0.246776	0.052732	-0.23831	-0.08891	0.157322	0.031311	-0.32623	0.232951
-0.26667	0.25623	0.210109	0.136066	-0.16164	-0.05557	0.150656	0.031311	-0.37956	0.219617
-0.25	0.202896	0.106776	0.156066	-0.10497	-0.04224	0.143989	0.044645	-0.3729	0.216284
-0.23333	0.122896	-0.03656	0.149399	-0.05497	-0.06557	0.147322	0.027978	-0.38956	0.282951
-0.21667	0.059563	-0.35322	0.156066	-0.04164	-0.08224	0.153989	0.004645	-0.40956	0.222951
-0.2	-0.02044	-0.43656	0.176066	-0.06831	-0.09224	0.180656	-0.03869	-0.48956	0.042951
-0.18333	-0.1171	-0.40322	0.206066	-0.05831	-0.14891	0.197322	-0.05869	-0.56956	-0.09038
-0.16667	-0.16044	-0.38656	0.269399	-0.09164	-0.20224	0.187322	-0.10869	-0.5529	-0.14038
-0.15	-0.25044	-0.37989	0.289399	-0.13497	-0.18557	0.223989	-0.09869	-0.53623	-0.13705
-0.13333	-0.23377	-0.40322	0.299399	-0.15497	-0.13224	0.277322	-0.12536	-0.5329	-0.18372
-0.11667	-0.2871	-0.40989	0.316066	-0.09831	-0.08557	0.143989	-0.21869	-0.4429	-0.11372
-0.1	-0.28044	-0.40989	0.302732	0.025027	0.184426	0.040656	-0.31869	-0.42623	-0.07038
-0.08333	-0.2271	-0.32322	0.229399	0.098361	0.27776	0.020656	-0.35202	-0.4829	-0.13038
-0.06667	-0.1871	-0.23989	0.126066	0.135027	0.27776	-0.06601	-0.36869	-0.48956	-0.12038
-0.05	-0.30377	-0.21322	-0.06727	0.158361	0.23776	-0.12934	-0.36536	-0.47956	0.019617
-0.03333	-0.3071	-0.29656	-0.2106	0.221694	0.204426	-0.16601	-0.32869	-0.4729	0.046284
-0.01667	-0.36377	-0.27656	-0.21727	0.225027	0.181093	-0.09934	-0.29536	-0.39623	-0.00372
0	-0.32044	-0.37656	-0.2806	0.105027	0.12776	-0.00268	-0.35202	-0.3329	0.002951
0.016667	-0.3371	-0.40989	-0.2806	0.055027	0.104426	-0.08601	-0.46202	-0.31623	0.019617
0.033333	-0.84044	-0.43656	-0.1206	0.061694	0.024426	-0.08268	-0.51536	-0.26623	0.039617
0.05	-0.1271	-0.52322	-0.05727	0.515027	-0.02224	-0.06934	-0.55202	-0.2329	0.056284
0.066667	-0.0971	-0.44322	-0.0706	0.205027	-0.02891	-0.03268	-0.51536	-0.11623	0.049617
0.083333	-0.1271	-0.41322	0.076066	-0.02497	-0.13557	0.177322	-0.48202	1.27044	0.092951
0.1	-0.2371	-0.57322	0.192732	-0.05497	0.054426	0.220656	-0.39869	0.707104	0.189617
0.116667	-0.10044	-0.64322	0.076066	-0.16831	0.181093	0.257322	-0.16536	-0.97956	0.202951
0.133333	-0.0671	-0.62322	0.292732	-0.28831	0.23776	0.397322	-0.15202	-0.71956	0.206284
0.15	0.009563	-0.62656	0.176066	-0.35164	0.10776	0.570656	-0.09202	-0.8829	0.169617
0.166667	0.13623	-0.72322	0.112732	-0.39497	-0.14891	0.720656	0.094645	-1.0529	0.052951
0.183333	0.199563	-0.71322	0.196066	-0.30497	-0.29224	0.837322	0.257978	-1.04956	0.036284
0.2	0.302896	-0.57322	0.192732	-0.04164	-0.42224	0.967322	0.247978	-1.00623	0.012951
0.216667	0.072896	-0.44989	0.149399	0.121694	-0.44224	1.02066	0.164645	-0.88956	0.026284
0.233333	-0.39044	-0.36656	0.216066	0.095027	-0.59891	0.897322	0.117978	-0.82956	0.022951
0.25	-0.1571	-0.15989	0.336066	0.068361	-0.70557	0.853989	0.114645	-0.9229	0.012951
0.266667	0.079563	0.020109	0.482732	0.218361	-0.60557	0.710656	0.264645	-0.81623	0.249617
0.283333	0.199563	-0.04656	0.642732	0.475027	-0.38224	0.620656	0.347978	-0.57956	0.376284
0.3	0.23623	-0.17656	0.712732	0.611694	-0.22557	0.767322	0.461311	-0.37956	0.449617
0.316667	0.14623	-0.35656	0.772732	0.775027	-0.10891	0.753989	0.597978	-0.3829	0.626284
0.333333	0.23623	-0.39656	0.862732	0.705027	-0.23224	0.573989	0.597978	-0.37956	0.606284
0.35	0.289563	-0.17989	0.896066	0.641694	-0.27891	0.463989	0.691311	-0.34623	0.469617
0.366667	0.212896	-0.06656	0.949399	0.741694	-0.13891	0.577322	0.817978	-0.42623	0.392951
0.383333	0.04623	0.036776	0.876066	0.848361	-0.01224	0.607322	0.787978	-0.4129	0.402951
0.4	0.052896	0.120109	0.942732	0.871694	-0.04224	0.600656	0.851311	-0.23623	0.486284
0.416667	0.18623	0.100109	0.876066	0.808361	-0.11224	0.373989	1.11798	-0.1629	0.596284
0.433333	0.19623	0.033443	0.819399	0.815027	-0.12891	0.247322	1.30131	-0.09623	0.522951
0.45	-0.12377	0.073443	0.716066	0.728361	-0.10891	0.227322	1.46131	-0.05956	0.472951
0.466667	0.092896	0.183443	0.732732	0.681694	-0.00891	0.233989	1.59465	-0.0329	0.596284
0.483333	0.48623	0.296776	0.782732	0.668361	-0.09557	0.043989	1.65798	0.087104	0.579617
0.5	0.432896	0.313443	0.726066	0.688361	-0.32224	-0.06268	1.68798	0.260437	0.379617
0.516667	0.319563	0.250109	0.802732	0.701694	-0.41224	-0.11601	1.69131	0.270437	0.369617
0.533333	0.23623	0.250109	0.896066	0.681694	-0.36557	-0.18934	1.69464	0.310437	0.292951
0.55	0.222896	0.283443	0.829399	0.718361	-0.26557	-0.14934	1.68798	0.387104	0.289617
0.566667	0.319563	0.336776	0.772732	0.765027	-0.17557	-0.02268	1.54131	0.36377	0.292951
0.583333	0.33623	0.306776	0.729399	0.705027	-0.08557	0.070656	1.35131	0.410437	0.259617
0.6	0.31623	0.273443	0.706066	0.541694	-0.11557	0.083989	1.26798	0.440437	0.242951
0.616667	0.462896	0.136776	0.742732	0.365027	-0.05224	0.120656	1.33798	0.40377	0.199617
0.633333	0.549563	0.180109	0.836066	0.265027	0.13776	0.173989	1.25131	0.44377	-0.01705
0.65	0.529563	0.343443	0.799399	0.201694	0.234426	0.227322	1.12131	0.47377	0.016284
0.666667	0.502896	0.573443	0.802732	0.145027	0.29776	0.320656	1.10465	0.487104	0.009617
0.683333	0.522896	0.846776	0.856066	0.158361	0.284426	0.373989	1.14464	0.45377	-0.07372
0.7	0.582896	0.866776	0.886066	0.368361	0.14776	0.347322	1.16464	0.280437	-0.17372
0.716667	0.689563	0.860109	0.809399	0.498361	0.084426	0.433989	1.19131	0.130437	-0.17705
0.733333	0.71623	0.860109	0.792732	0.601694	0.121093	0.410656	1.36131	0.317104	-0.21038
0.75	0.57623	0.803443	0.819399	0.655027	-0.04891	0.520656	1.40798	0.330437	-0.20705
0.766667	0.392896	0.726776	0.696066	0.651694	-0.24891	0.500656	1.33798	0.03377	-0.15038
0.783333	0.202896	0.670109	0.659399	0.725027	-0.22557	0.373989	1.31798	-0.00623	-0.05038
0.8	0.212896	0.683443	0.709399	0.768361	-0.13224	0.337322	1.26798	0.090437	0.086284
0.816667	0.299563	0.633443	0.792732	0.798361	-0.01224	0.323989	1.08798	0.14377	0.212951
0.833333	0.402896	0.533443	0.789399	0.801694	-0.00557	0.340656	0.961311	0.160437	0.259617
0.85	0.472896	0.433443	0.769399	0.851694	0.061093	0.420656	0.844645	0.167104	0.349617
0.866667	0.489563	0.453443	0.562732	0.918361	0.094426	0.497322	0.757978	0.130437	0.499617
0.883333	0.46623	0.393443	0.349399	1.04836	0.201093	0.540656	0.704645	0.087104	0.519617
0.9	0.359563	0.370109	0.219399	1.15503	0.22776	0.570656	0.637978	0.02377	0.459617
0.916667	0.272896	0.290109	0.156066	1.24169	0.19776	0.547322	0.601311	-0.0029	0.409617
0.933333	0.25623	0.160109	0.072732	1.35503	0.154426	0.503989	0.597978	0.030437	0.379617
0.95	0.322896	0.096776	0.022732	1.34836	0.144426	0.497322	0.621311	0.13377	0.339617
0.966667	0.362896	0.036776	-0.00393	1.33169	0.204426	0.540656	0.607978	0.197104	0.276284
0.983333	0.412896	-0.01989	-0.0006	1.32169	0.264426	0.600656	0.661311	0.207104	0.269617
1	0.439563	-0.01656	0.022732	1.23836	0.261093	0.617322	0.671311	0.23377	0.269617
1.01667	0.49623	0.076776	-0.00393	1.23836	0.304426	0.577322	0.687978	0.29377	0.386284
1.03333	0.499563	0.160109	0.006066	1.25836	0.36776	0.537322	0.707978	0.320437	0.472951
1.05	0.372896	0.163443	0.069399	1.32503	0.43776	0.463989	0.691311	0.390437	0.516284
1.06667	0.339563	0.116776	0.102732	1.31169	0.471093	0.287322	0.674645	0.370437	0.542951
1.08333	0.579563	0.073443	0.099399	1.20503	0.451093	0.233989	0.657978	0.367104	0.509617
1.1	0.55623	-0.00322	0.116066	1.18836	0.37776	0.187322	0.621311	0.54377	0.509617
1.11667	0.509563	-0.03656	0.226066	1.19169	0.254426	0.157322	0.637978	0.567104	0.496284
1.13333	0.542896	-0.00322	0.299399	1.27503	0.21776	0.167322	0.761311	0.477104	0.516284
1.15	0.629563	0.136776	0.226066	1.34503	0.22776	0.200656	0.847978	0.46377	0.542951
1.16667	0.68623	0.180109	0.212732	1.34169	0.22776	0.180656	0.877978	0.457104	0.549617
1.18333	0.699563	0.190109	0.246066	1.36169	0.261093	0.130656	0.867978	0.377104	0.512951
1.2	0.79623	-0.04656	0.256066	1.44503	0.321093	0.130656	0.764645	0.310437	0.499617
1.21667	0.682896	-0.26989	0.259399	1.46836	0.411093	0.057322	0.694645	0.29377	0.439617
1.23333	0.48623	-0.32989	0.332732	1.51503	0.50776	0.030656	0.711311	0.307104	0.382951
1.25	0.409563	-0.27989	0.392732	1.62836	0.524426	0.013989	0.704645	0.31377	0.356284
1.26667	0.422896	-0.26322	0.429399	1.69503	0.604426	-0.00268	0.731311	0.28377	0.336284
1.28333	0.42623	-0.30322	0.452732	1.71169	0.63776	0.007322	0.787978	0.237104	0.322951
1.3	0.332896	-0.21989	0.482732	1.76836	0.601093	0.040656	0.864645	0.18377	0.336284
1.31667	0.359563	-0.06656	0.572732	1.92169	0.584426	0.070656	0.934645	0.147104	0.342951
1.33333	0.399563	-0.05989	0.582732	1.98503	0.594426	0.177322	0.971311	0.137104	0.372951
1.35	0.272896	-0.02656	0.512732	1.93503	0.641093	0.167322	0.974645	0.100437	0.396284
1.36667	0.239563	-0.00989	0.446066	1.81503	0.611093	0.137322	0.964645	0.09377	0.336284
1.38333	0.399563	0.116776	0.392732	1.74169	0.50776	0.143989	0.977978	0.100437	0.236284
1.4	0.479563	0.223443	0.382732	1.68836	0.551093	0.187322	0.997978	0.07377	0.222951
1.41667	0.50623	0.240109	0.466066	1.63836	0.64776	0.150656	0.974645	0.05377	0.202951
1.43333	0.419563	0.233443	0.566066	1.61836	0.70776	0.147322	1.00798	0.090437	0.219617
1.45	0.17623	0.200109	0.622732	1.59503	0.73776	0.137322	1.09798	0.14377	0.219617
1.46667	0.20623	0.173443	0.689399	1.58503	0.751093	0.150656	1.23798	0.17377	0.172951
1.48333	0.269563	0.196776	0.716066	1.60169	0.824426	0.213989	1.28465	0.190437	0.136284
1.5	0.34623	0.223443	0.732732	1.62503	0.881093	0.357322	1.32465	0.207104	0.079617
1.51667	0.46623	0.196776	0.646066	1.61836	0.914426	0.403989	1.32798	0.127104	0.029617
1.53333	0.449563	0.223443	0.502732	1.58503	0.861093	0.330656	1.30465	0.03377	0.032951
1.55	0.492896	0.183443	0.399399	1.48169	0.84776	0.257322	1.22798	-0.00956	0.122951
1.56667	0.54623	0.160109	0.299399	1.40836	0.85776	0.230656	1.13798	-0.0329	0.182951
1.58333	0.569563	0.193443	0.259399	1.37836	0.694426	0.213989	1.08798	-0.0629	0.272951
1.6	0.60623	0.173443	0.239399	1.34169	0.48776	0.113989	1.13464	-0.06956	0.262951
1.61667	0.642896	0.133443	0.272732	1.33503	0.401093	-0.12268	1.17798	-0.0229	0.229617
1.63333	0.63623	0.060109	0.359399	1.38169	0.43776	-0.06934	1.21131	0.027104	0.256284
1.65	0.659563	0.053443	0.339399	1.43836	0.41776	0.160656	1.21798	0.07377	0.306284
1.66667	0.70623	0.003443	0.359399	1.40169	0.42776	0.187322	1.17464	0.130437	0.406284
1.68333	0.769563	-0.11656	0.372732	1.32836	0.42776	0.180656	1.11465	0.17377	0.492951
1.7	0.769563	-0.28322	0.316066	1.18836	0.381093	0.180656	1.11131	0.140437	0.509617
1.71667	0.799563	-0.33322	0.339399	1.05836	0.421093	0.177322	1.19798	0.11377	0.482951
1.73333	0.85623	-0.37322	0.252732	0.928361	0.434426	0.237322	1.23798	0.127104	0.409617
1.75	0.902896	-0.41989	0.256066	0.865027	0.394426	0.383989	1.24465	0.16377	0.242951
1.76667	0.982896	-0.41656	0.312732	0.858361	0.404426	0.397322	1.19131	0.20377	0.196284
1.78333	1.04956	-0.38989	0.276066	0.768361	0.38776	0.387322	1.19464	0.21377	0.172951
1.8	1.10623	-0.35989	0.286066	0.675027	0.481093	0.417322	1.24465	0.217104	0.166284
1.81667	1.07956	-0.22656	0.329399	0.671694	0.68776	0.470656	1.24465	0.25377	0.189617
1.83333	0.942896	-0.16656	0.372732	0.638361	0.73776	0.480656	1.25131	0.247104	0.239617
1.85	0.902896	-0.12656	0.369399	0.445027	0.704426	0.523989	1.28798	0.267104	0.279617
1.86667	0.912896	-0.11989	0.309399	0.408361	0.64776	0.593989	1.29131	0.357104	0.256284
1.88333	0.929563	-0.09989	0.249399	0.425027	0.721093	0.643989	1.27465	0.410437	0.249617
1.9	0.949563	-0.07322	0.172732	0.548361	0.814426	0.670656	1.31798	0.330437	0.322951
1.91667	0.92623	-0.05322	0.182732	0.721694	0.83776	0.680656	1.29465	0.207104	0.406284
1.93333	0.88623	0.006776	0.206066	0.771694	0.754426	0.697322	1.26131	0.140437	0.412951
1.95	0.852896	0.143443	0.282732	0.698361	0.664426	0.710656	1.26798	0.037104	0.389617
1.96667	0.739563	0.253443	0.492732	0.665027	0.58776	0.693989	1.36465	-0.0029	0.342951
1.98333	0.63623	0.266776	0.572732	0.621694	0.491093	0.670656	1.43464	0.000437	0.386284
2	0.629563	0.400109	0.542732	0.561694	0.484426	0.740656	1.50798	-0.0229	0.386284
2.01667	0.58623	0.503443	0.532732	0.518361	0.514426	0.853989	1.44798	-0.06956	0.356284
2.03333	0.539563	0.426776	0.492732	0.518361	0.50776	0.917322	1.38464	-0.10623	0.342951
2.05	0.49623	0.343443	0.312732	0.558361	0.501093	1.03732	1.37131	-0.12956	0.369617
2.06667	0.359563	0.403443	0.256066	0.548361	0.511093	1.05399	1.40464	-0.17956	0.399617
2.08333	0.259563	0.460109	0.279399	0.485027	0.614426	1.02399	1.38464	-0.19623	0.409617
2.1	0.192896	0.350109	0.379399	0.448361	0.611093	1.04066	1.33465	-0.20623	0.419617
2.11667	0.17623	0.336776	0.389399	0.505027	0.594426	1.10399	1.24798	-0.28956	0.436284
2.13333	0.142896	0.370109	0.342732	0.581694	0.56776	1.14732	1.14798	-0.37623	0.376284
2.15	0.19623	0.366776	0.269399	0.578361	0.51776	1.25066	1.07798	-0.2629	0.352951
2.16667	0.229563	0.426776	0.332732	0.661694	0.54776	1.32732	1.04131	-0.10623	0.352951
2.18333	0.322896	0.513443	0.436066	0.615027	0.53776	1.22732	1.00798	0.140437	0.332951
2.2	0.34623	0.566776	0.352732	0.475027	0.494426	1.19399	0.981311	0.167104	0.316284
2.21667	0.339563	0.606776	0.252732	0.415027	0.454426	1.19399	0.987978	0.097104	0.382951
2.23333	0.552896	0.633443	0.282732	0.515027	0.434426	1.18732	0.994645	0.020437	0.416284
2.25	0.71623	0.630109	0.279399	0.565027	0.46776	1.10066	0.974645	-0.0229	0.386284
2.26667	0.732896	0.623443	0.302732	0.571694	0.58776	0.963989	0.951311	0.020437	0.362951
2.28333	0.792896	0.606776	0.522732	0.551694	0.584426	1.05066	0.971311	0.047104	0.406284
2.3	0.762896	0.620109	0.786066	0.521694	0.514426	1.22732	1.00465	0.027104	0.409617
2.31667	0.62623	0.700109	0.926066	0.561694	0.57776	1.34066	1.05131	0.07377	0.432951
2.33333	0.53623	0.723443	0.956066	0.551694	0.711093	1.38732	1.10131	0.120437	0.399617
2.35	0.559563	0.766776	1.11273	0.428361	0.684426	1.36732	1.12464	0.150437	0.326284
2.36667	0.502896	0.873443	1.2994	0.365027	0.64776	1.26399	1.13131	0.05377	0.269617
2.38333	0.502896	0.836776	1.22273	0.375027	0.681093	1.26732	1.14798	-0.00956	0.232951
2.4	0.54623	0.810109	1.06273	0.385027	0.61776	1.31066	1.18798	0.01377	0.282951
2.41667	0.539563	0.793443	0.936066	0.338361	0.644426	1.33399	1.20131	0.080437	0.266284
2.43333	0.52623	0.790109	0.892732	0.305027	0.66776	1.34399	1.15464	0.19377	0.269617
2.45	0.542896	0.613443	0.916066	0.268361	0.621093	1.46066	1.09465	0.307104	0.282951
2.46667	0.569563	0.486776	0.916066	0.311694	0.58776	1.54732	1.00131	0.390437	0.269617
2.48333	0.529563	0.430109	0.996066	0.418361	0.614426	1.44732	0.874645	0.48377	0.279617
2.5	0.44623	0.386776	1.05607	0.525027	0.59776	1.37399	0.714645	0.567104	0.276284
2.51667	0.399563	0.370109	1.05607	0.618361	0.524426	1.34732	0.671311	0.547104	0.292951
2.53333	0.37623	0.363443	0.996066	0.601694	0.47776	1.30066	0.671311	0.47377	0.312951
2.55	0.392896	0.353443	0.916066	0.538361	0.43776	1.26399	0.681311	0.43377	0.339617
2.56667	0.509563	0.293443	0.882732	0.495027	0.38776	1.27399	0.684645	0.427104	0.332951
2.58333	0.57623	0.236776	0.909399	0.478361	0.301093	1.23066	0.594645	0.42377	0.349617
2.6	0.61623	0.190109	0.892732	0.468361	0.224426	1.13732	0.484645	0.447104	0.469617
2.61667	0.639563	0.166776	0.796066	0.521694	0.21776	1.09732	0.367978	0.510437	0.579617
2.63333	0.69623	0.130109	0.602732	0.568361	0.23776	1.09066	0.301311	0.547104	0.612951
2.65	0.689563	0.096776	0.536066	0.675027	0.241093	1.06399	0.254645	0.540437	0.582951
2.66667	0.672896	0.036776	0.766066	0.788361	0.201093	1.03399	0.241311	0.500437	0.526284
2.68333	0.702896	-0.00322	0.919399	0.805027	0.201093	1.03732	0.234645	0.407104	0.452951
2.7	0.71623	0.000109	1.0694	0.928361	0.24776	1.04399	0.217978	0.317104	0.322951
2.71667	0.699563	0.063443	1.02607	1.03503	0.18776	1.03066	0.217978	0.280437	0.319617
2.73333	0.61623	0.073443	0.969399	1.04503	0.131093	0.997322	0.221311	0.25377	0.352951
2.75	0.58623	0.056776	1.01607	1.07169	0.191093	0.970656	0.207978	0.24377	0.356284
2.76667	0.61623	0.090109	1.0194	1.04169	0.251093	0.930656	0.161311	0.20377	0.326284
2.78333	0.62623	0.123443	0.932732	0.951694	0.371093	0.927322	0.147978	0.157104	0.242951
2.8	0.639563	0.173443	0.999399	0.961694	0.364426	0.917322	0.151311	0.077104	0.249617
2.81667	0.60623	0.206776	1.09273	0.938361	0.321093	0.863989	0.167978	-0.07956	0.306284
2.83333	0.60623	0.200109	1.07273	0.895027	0.344426	0.837322	0.221311	-0.19956	0.256284
2.85	0.619563	0.163443	1.01273	0.888361	0.344426	0.820656	0.331311	-0.28623	0.242951
2.86667	0.602896	0.090109	0.916066	0.855027	0.31776	0.753989	0.357978	-0.36956	0.286284
2.88333	0.59623	0.050109	0.862732	0.801694	0.334426	0.737322	0.324645	-0.3929	0.246284
2.9	0.559563	0.096776	0.852732	0.761694	0.44776	0.773989	0.381311	-0.2629	0.189617
2.91667	0.532896	0.093443	0.829399	0.718361	0.544426	0.670656	0.411311	-0.15956	0.162951
2.93333	0.479563	0.046776	0.749399	0.748361	0.524426	0.577322	0.317978	-0.0729	0.089617
2.95	0.319563	0.073443	0.669399	0.745027	0.40776	0.553989	0.334645	-0.01956	0.062951
2.96667	0.16623	0.203443	0.562732	0.705027	0.36776	0.497322	0.391311	-0.0529	0.152951
2.98333	0.209563	0.283443	0.506066	0.725027	0.391093	0.403989	0.321311	-0.07623	0.192951
3	0.33623	0.360109	0.589399	0.718361	0.46776	0.440656	0.404645	-0.11623	0.112951
3.01667	0.292896	0.356776	0.659399	0.668361	0.574426	0.597322	0.471311	-0.20623	0.032951
3.03333	0.15623	0.256776	0.632732	0.615027	0.641093	0.730656	0.501311	-0.14956	0.119617
3.05	0.30623	0.180109	0.512732	0.571694	0.621093	0.800656	0.614645	-0.0929	0.269617
3.06667	0.409563	0.176776	0.389399	0.571694	0.60776	0.690656	0.694645	-0.13623	0.426284
3.08333	0.479563	0.113443	0.272732	0.525027	0.534426	0.403989	0.681311	0.01377	0.479617
3.1	0.502896	0.000109	0.162732	0.495027	0.301093	0.250656	0.654645	0.07377	0.529617
3.11667	0.50623	-0.13989	0.056066	0.485027	0.28776	0.157322	0.704645	0.130437	0.609617
3.13333	0.492896	-0.15656	-0.05727	0.478361	0.351093	0.063989	0.691311	0.190437	0.616284
3.15	0.449563	-0.18656	-0.0506	0.488361	0.354426	0.043989	0.691311	0.220437	0.656284
3.16667	0.429563	-0.23656	-0.07727	0.675027	0.291093	0.043989	0.747978	0.20377	0.692951
3.18333	0.332896	-0.17656	-0.11727	0.818361	0.291093	0.040656	0.731311	0.20377	0.642951
3.2	0.119563	-0.01989	0.019399	0.911694	0.231093	0.037322	0.677978	0.16377	0.552951
3.21667	0.08623	0.026776	0.086066	0.921694	0.151093	0.093989	0.684645	0.130437	0.522951
3.23333	0.039563	-0.02989	0.126066	0.915027	0.16776	0.147322	0.651311	0.09377	0.379617
3.25	0.042896	0.113443	0.112732	0.945027	0.37776	0.177322	0.624645	0.09377	0.252951
3.26667	0.092896	0.083443	0.226066	0.948361	0.521093	0.167322	0.647978	0.070437	0.159617
3.28333	0.112896	-0.06322	0.302732	0.968361	0.514426	0.077322	0.737978	0.02377	0.146284
3.3	0.29623	-0.03989	0.252732	0.975027	0.334426	0.097322	0.767978	0.000437	0.179617
3.31667	0.479563	-0.09989	0.456066	0.991694	0.15776	0.027322	0.797978	0.04377	0.242951
3.33333	0.55623	-0.19322	0.592732	1.01836	0.071093	-0.09601	0.854645	0.117104	0.362951
3.35	0.582896	-0.27322	0.706066	1.02836	0.084426	-0.20934	0.901311	0.15377	0.426284
3.36667	0.589563	-0.25989	0.626066	1.01169	0.134426	-0.20268	0.861311	0.190437	0.496284
3.38333	0.602896	-0.14989	0.579399	0.901694	0.181093	-0.26601	0.794645	0.150437	0.559617
3.4	0.682896	-0.17989	0.602732	0.885027	0.27776	-0.42601	0.714645	0.14377	0.509617
3.41667	0.759563	-0.25322	0.712732	0.865027	0.381093	-0.46934	0.727978	0.18377	0.439617
3.43333	0.84623	-0.29989	0.809399	0.851694	0.504426	-0.31268	0.691311	0.177104	0.416284
3.45	0.872896	-0.30322	0.879399	0.901694	0.591093	-0.21601	0.644645	0.110437	0.389617
3.46667	0.859563	-0.47656	0.792732	1.05169	0.611093	-0.19934	0.634645	0.09377	0.372951
3.48333	0.829563	-0.56322	0.659399	1.16836	0.564426	-0.26601	0.657978	0.10377	0.362951
3.5	0.782896	-0.44989	0.539399	1.20836	0.514426	-0.23934	0.694645	0.16377	0.382951
3.51667	0.772896	-0.28656	0.359399	1.25836	0.544426	-0.18601	0.784645	0.227104	0.336284
3.53333	0.76623	-0.29322	0.436066	1.52503	0.544426	-0.10934	0.851311	0.280437	0.302951
3.55	0.769563	-0.39989	0.736066	1.57836	0.48776	-0.05601	0.757978	0.35377	0.276284
3.56667	0.759563	-0.44656	0.859399	1.48503	0.474426	0.053989	0.694645	0.390437	0.222951
3.58333	0.72623	-0.40989	0.896066	1.33503	0.48776	0.163989	0.781311	0.420437	0.242951
3.6	0.692896	-0.35989	0.926066	1.26836	0.45776	0.167322	0.761311	0.44377	0.296284
3.61667	0.67623	-0.25322	0.952732	1.22503	0.47776	0.327322	0.661311	0.48377	0.382951
3.63333	0.659563	-0.03989	0.896066	1.15836	0.514426	0.363989	0.474645	0.480437	0.456284
3.65	0.62623	0.060109	0.816066	1.10169	0.554426	0.293989	0.397978	0.570437	0.389617
3.66667	0.559563	0.200109	0.696066	1.05503	0.63776	0.287322	0.384645	0.560437	0.379617
3.68333	0.522896	0.336776	0.729399	0.985027	0.754426	0.283989	0.424645	0.35377	0.382951
3.7	0.529563	0.426776	0.736066	0.921694	0.75776	0.373989	0.411311	0.220437	0.346284
3.71667	0.519563	0.466776	0.679399	0.875027	0.79776	0.400656	0.511311	0.250437	0.326284
3.73333	0.512896	0.423443	0.632732	0.838361	0.79776	0.430656	0.704645	0.197104	0.372951
3.75	0.502896	0.406776	0.649399	0.811694	0.71776	0.440656	0.744645	0.14377	0.442951
3.76667	0.512896	0.446776	0.696066	0.765027	0.564426	0.387322	0.804645	0.177104	0.562951
3.78333	0.469563	0.446776	0.706066	0.671694	0.534426	0.343989	0.851311	0.197104	0.586284
3.8	0.459563	0.433443	0.819399	0.601694	0.614426	0.413989	0.914645	0.147104	0.582951
3.81667	0.46623	0.423443	0.886066	0.521694	0.704426	0.503989	0.931311	0.18377	0.646284
3.83333	0.429563	0.376776	1.01607	0.568361	0.704426	0.440656	0.947978	0.19377	0.699617
3.85	0.429563	0.370109	1.05273	0.605027	0.63776	0.563989	0.934645	0.140437	0.669617
3.86667	0.47623	0.343443	0.922732	0.611694	0.594426	0.647322	0.857978	0.127104	0.839617
3.88333	0.54623	0.250109	0.886066	0.715027	0.524426	0.693989	0.847978	0.117104	0.946284
3.9	0.61623	0.303443	0.856066	0.808361	0.51776	0.697322	0.847978	0.09377	0.906284
3.91667	0.61623	0.360109	0.846066	0.738361	0.684426	0.553989	0.907978	0.110437	0.926284
3.93333	0.589563	0.393443	0.699399	0.685027	0.761093	0.450656	0.944645	0.147104	0.806284
3.95	0.699563	0.433443	0.609399	0.605027	0.691093	0.480656	0.881311	0.14377	0.722951
3.96667	0.65623	0.423443	0.656066	0.525027	0.731093	0.387322	0.871311	0.130437	0.689617
3.98333	0.529563	0.343443	0.676066	0.411694	0.771093	0.367322	0.874645	0.130437	0.656284
4	0.542896	0.370109	0.652732	0.165027	0.684426	0.400656	0.861311	0.067104	0.646284
4.01667	0.539563	0.336776	0.622732	0.061694	0.621093	0.410656	0.931311	-0.04623	0.666284
4.03333	0.492896	0.186776	0.686066	-0.02831	0.594426	0.317322	0.984645	-0.07956	0.559617
4.05	0.539563	0.153443	0.872732	-0.00164	0.624426	0.087322	1.01131	-0.06956	0.406284
4.06667	0.62623	0.133443	0.912732	0.121694	0.754426	-0.11934	0.971311	-0.10956	0.329617
4.08333	0.659563	0.130109	0.856066	0.085027	0.884426	-0.09601	0.984645	-0.14623	0.319617
4.1	0.722896	0.140109	0.762732	0.028361	0.89776	-0.08601	1.09798	-0.09623	0.306284
4.11667	0.792896	0.223443	0.786066	0.055027	0.93776	-0.10268	1.12464	0.140437	0.246284
4.13333	0.849563	0.280109	0.802732	0.075027	0.954426	-0.16601	1.09131	0.227104	0.256284
4.15	0.852896	0.313443	0.809399	0.068361	0.971093	-0.13601	1.13798	0.257104	0.266284
4.16667	0.779563	0.323443	0.789399	0.128361	0.944426	-0.07268	1.25798	0.420437	0.276284
4.18333	0.609563	0.263443	0.862732	0.215027	0.834426	-0.05601	1.32465	0.567104	0.339617
4.2	0.60623	0.280109	1.1494	0.268361	0.80776	0.037322	1.31798	0.67377	0.362951
4.21667	0.57623	0.360109	1.27607	0.258361	0.91776	0.053989	1.26131	1.05044	0.349617
4.23333	0.529563	0.333443	1.2694	0.251694	1.00776	0.047322	1.23798	1.12377	0.346284
4.25	0.589563	0.343443	1.29607	0.291694	0.964426	0.067322	1.22131	1.04044	0.332951
4.26667	0.63623	0.383443	1.33273	0.371694	1.00109	0.093989	1.21464	0.900437	0.426284
4.28333	0.619563	0.383443	1.38273	0.435027	0.93776	0.143989	1.20798	0.847104	0.529617
4.3	0.592896	0.146776	1.45273	0.388361	0.761093	0.153989	1.21131	0.810437	0.592951
4.31667	0.599563	0.156776	1.48607	0.328361	0.671093	0.157322	1.20798	0.85377	0.539617
4.33333	0.659563	0.213443	1.51273	0.278361	0.664426	0.187322	1.22798	0.977104	0.519617
4.35	0.772896	0.220109	1.32607	0.285027	0.614426	0.187322	1.24131	1.03044	0.469617
4.36667	0.80623	0.143443	1.20273	0.375027	0.524426	0.117322	1.20798	1.05044	0.306284
4.38333	0.759563	0.070109	1.1794	0.515027	0.511093	0.037322	1.13798	1.18377	0.209617
4.4	0.762896	0.186776	1.14607	0.671694	0.544426	-0.00268	1.09131	1.2771	0.099617
4.41667	0.76623	0.373443	1.13607	0.698361	0.601093	-0.02268	1.03798	1.2771	0.056284
4.43333	0.65623	0.413443	1.1894	0.718361	0.581093	-0.00268	0.961311	1.29044	0.019617
4.45	0.50623	0.340109	1.1594	0.695027	0.524426	0.040656	0.877978	1.32044	0.072951
4.46667	0.499563	0.300109	1.12607	0.605027	0.474426	0.033989	0.791311	1.32044	0.166284
4.48333	0.479563	0.326776	1.13273	0.565027	0.44776	0.047322	0.727978	1.31044	0.272951
4.5	0.392896	0.243443	1.1094	0.595027	0.404426	0.080656	0.704645	1.33044	0.402951
4.51667	0.349563	0.230109	1.12273	0.645027	0.364426	0.113989	0.714645	1.29377	0.322951
4.53333	0.192896	0.280109	1.16607	0.725027	0.361093	0.167322	0.721311	1.25377	0.199617
4.55	0.072896	0.303443	1.25607	0.761694	0.334426	0.187322	0.734645	1.21377	0.172951
4.56667	-0.11044	0.220109	1.21273	0.765027	0.264426	0.213989	0.774645	1.23044	0.262951
4.58333	-0.19377	0.186776	1.04273	0.638361	0.331093	0.253989	0.774645	1.23377	0.299617
4.6	-0.2571	0.163443	1.1694	0.625027	0.39776	0.130656	0.767978	1.2171	0.316284
4.61667	-0.3971	0.173443	1.2694	0.541694	0.43776	0.113989	0.764645	1.17377	0.349617
4.63333	-0.40377	0.166776	1.2694	0.481694	0.494426	0.090656	0.781311	1.0771	0.362951
4.65	-0.32044	0.260109	1.10607	0.498361	0.694426	0.137322	0.817978	0.927104	0.372951
4.66667	-0.28044	0.350109	1.06273	0.598361	0.791093	0.200656	0.734645	0.820437	0.402951
4.68333	-0.2771	0.430109	1.17273	0.598361	0.731093	0.243989	0.617978	0.760437	0.422951
4.7	-0.29377	0.536776	1.25607	0.515027	0.671093	0.243989	0.554645	0.75377	0.436284
4.71667	-0.3171	0.620109	1.2494	0.491694	0.624426	0.227322	0.534645	0.867104	0.516284
4.73333	-0.30044	0.713443	1.2394	0.471694	0.571093	0.237322	0.554645	0.90377	0.572951
4.75	-0.26044	0.740109	1.30273	0.395027	0.56776	0.253989	0.607978	0.85377	0.662951
4.76667	-0.2271	0.740109	1.36273	0.308361	0.564426	0.283989	0.591311	0.750437	0.749617
4.78333	-0.1471	0.713443	1.3394	0.278361	0.494426	0.287322	0.557978	0.677104	0.819617
4.8	0.042896	0.716776	1.25607	0.218361	0.464426	0.247322	0.534645	0.610437	0.802951
4.81667	0.122896	0.746776	1.2294	0.155027	0.40776	0.307322	0.511311	0.58377	0.746284
4.83333	0.139563	0.753443	1.2394	0.111694	0.401093	0.363989	0.437978	0.570437	0.742951
4.85	0.169563	0.730109	1.27273	0.081694	0.404426	0.443989	0.414645	0.507104	0.746284
4.86667	0.182896	0.660109	1.2694	0.088361	0.401093	0.607322	0.441311	0.35377	0.732951
4.88333	0.169563	0.630109	1.13607	0.101694	0.38776	0.617322	0.387978	0.270437	0.736284
4.9	0.169563	0.593443	0.956066	0.095027	0.374426	0.597322	0.257978	0.197104	0.752951
4.91667	0.21623	0.533443	0.809399	0.041694	0.311093	0.603989	0.227978	0.19377	0.719617
4.93333	0.249563	0.583443	0.679399	0.041694	0.281093	0.530656	0.197978	0.19377	0.662951
4.95	0.25623	0.640109	0.642732	0.131694	0.384426	0.480656	0.157978	0.110437	0.542951
4.96667	0.192896	0.646776	0.586066	0.201694	0.57776	0.450656	0.121311	0.04377	0.396284
4.98333	0.069563	0.680109	0.536066	0.341694	0.651093	0.413989	0.054645	0.087104	0.366284
5	-0.03044	0.690109	0.486066	0.391694	0.68776	0.437322	-0.08536	0.29377	0.336284
5.01667	-0.0471	0.706776	0.462732	0.418361	0.704426	0.483989	-0.22536	0.367104	0.302951
5.03333	-0.0071	0.680109	0.629399	0.475027	0.751093	0.533989	-0.25536	0.397104	0.322951
5.05	0.019563	0.620109	0.829399	0.608361	0.66776	0.520656	-0.27536	0.387104	0.379617
5.06667	0.012896	0.593443	0.852732	0.685027	0.62776	0.620656	-0.26536	0.287104	0.416284
5.08333	0.032896	0.576776	0.862732	0.725027	0.544426	0.713989	-0.22869	0.297104	0.436284
5.1	0.089563	0.543443	0.942732	0.818361	0.514426	0.723989	-0.15869	0.370437	0.452951
5.11667	0.089563	0.523443	0.989399	0.815027	0.47776	0.677322	0.041311	0.290437	0.459617
5.13333	0.09623	0.523443	0.992732	0.811694	0.391093	0.673989	0.361311	0.29377	0.456284
5.15	0.149563	0.536776	0.852732	0.868361	0.454426	0.683989	0.567978	0.48377	0.416284
5.16667	0.25623	0.540109	0.736066	0.941694	0.531093	0.737322	0.637978	0.520437	0.549617
5.18333	0.34623	0.563443	0.562732	0.928361	0.59776	0.773989	0.587978	0.64377	0.582951
5.2	0.34623	0.573443	0.469399	0.898361	0.59776	0.787322	0.511311	0.840437	0.582951
5.21667	0.339563	0.570109	0.459399	0.868361	0.51776	0.833989	0.524645	0.90377	0.542951
5.23333	0.29623	0.560109	0.509399	0.868361	0.461093	0.857322	0.654645	0.817104	0.496284
5.25	0.299563	0.543443	0.596066	0.971694	0.541093	0.877322	0.811311	0.727104	0.459617
5.26667	0.359563	0.550109	0.712732	1.08836	0.474426	0.870656	0.984645	0.680437	0.402951
5.28333	0.24623	0.730109	0.866066	1.06503	0.474426	0.837322	1.03798	0.64377	0.439617
5.3	0.162896	0.863443	0.972732	1.03836	0.46776	0.830656	1.07131	0.63377	0.452951
5.31667	0.15623	0.893443	1.08607	1.10169	0.45776	0.880656	1.18798	0.680437	0.459617
5.33333	0.129563	0.860109	1.0594	1.10503	0.39776	0.957322	1.25131	0.730437	0.449617
5.35	0.272896	0.783443	0.992732	1.08503	0.284426	1.00732	1.22798	0.727104	0.452951
5.36667	0.272896	0.713443	0.916066	1.09503	0.164426	0.960656	1.14464	0.740437	0.502951
5.38333	-0.00044	0.600109	0.726066	1.09503	0.154426	0.827322	1.08798	0.767104	0.492951
5.4	-0.15044	0.510109	0.502732	1.07169	0.22776	0.790656	1.08798	0.877104	0.542951
5.41667	-0.0971	0.323443	0.532732	1.02503	0.294426	0.773989	1.06131	0.990437	0.642951
5.43333	-0.09377	0.203443	0.602732	1.16169	0.401093	0.780656	1.00465	1.0371	0.639617
5.45	-0.06044	0.183443	0.709399	1.16169	0.424426	0.787322	1.05131	1.0471	0.612951
5.46667	0.00623	0.113443	0.816066	1.10836	0.36776	0.813989	1.08131	1.02044	0.606284
5.48333	0.062896	0.090109	0.872732	1.05503	0.28776	0.803989	1.06131	0.930437	0.546284
5.5	0.04623	0.073443	0.916066	1.03503	0.394426	0.797322	1.06131	0.877104	0.406284
5.51667	-0.0771	-0.01322	0.949399	1.13503	0.484426	0.743989	1.03465	0.917104	0.346284
5.53333	-0.24044	0.073443	0.962732	1.13503	0.55776	0.653989	0.911311	0.94377	0.312951
5.55	-0.26377	0.213443	0.969399	1.13169	0.591093	0.603989	0.727978	0.970437	0.346284
5.56667	-0.0671	0.293443	0.989399	1.14169	0.511093	0.610656	0.687978	0.89377	0.366284
5.58333	0.20623	0.280109	0.976066	1.12503	0.414426	0.663989	0.687978	0.807104	0.366284
5.6	0.33623	0.130109	0.786066	1.09503	0.391093	0.713989	0.547978	0.870437	0.392951
5.61667	0.29623	0.053443	0.596066	1.11503	0.371093	0.760656	0.407978	0.870437	0.486284
5.63333	0.269563	0.086776	0.509399	1.13836	0.284426	0.820656	0.341311	0.79377	0.576284
5.65	0.352896	0.100109	0.466066	1.10503	0.21776	0.820656	0.307978	0.720437	0.616284
5.66667	0.41623	-0.00989	0.402732	1.08836	0.08776	0.787322	0.271311	0.59377	0.559617
5.68333	0.41623	-0.09656	0.399399	1.19503	0.074426	0.827322	0.231311	0.500437	0.502951
5.7	0.279563	-0.13989	0.472732	1.22503	0.14776	0.873989	0.164645	0.450437	0.569617
5.71667	0.209563	-0.03989	0.532732	1.19503	0.211093	0.947322	0.094645	0.560437	0.549617
5.73333	0.199563	0.096776	0.572732	1.20169	0.26776	1.01732	0.071311	0.547104	0.449617
5.75	0.139563	0.156776	0.626066	1.22169	0.461093	1.07066	0.061311	0.47377	0.412951
5.76667	0.042896	0.170109	0.662732	1.19836	0.461093	1.08399	0.061311	0.400437	0.439617
5.78333	0.05623	0.153443	0.776066	1.18836	0.38776	1.16399	0.024645	0.300437	0.459617
5.8	0.152896	0.076776	0.842732	1.34169	0.344426	1.25732	0.004645	0.270437	0.466284
5.81667	0.189563	-0.00989	0.852732	1.42503	0.324426	1.32732	-0.00202	0.31377	0.442951
5.83333	0.09623	0.053443	0.866066	1.44169	0.26776	1.38066	-0.04202	0.317104	0.402951
5.85	0.039563	0.073443	0.822732	1.42503	0.35776	1.39732	-0.04869	0.347104	0.402951
5.86667	0.04623	0.070109	0.899399	1.38836	0.524426	1.41399	-0.09869	0.37377	0.382951
5.88333	0.029563	0.056776	0.936066	1.31503	0.524426	1.43399	-0.06202	0.270437	0.252951
5.9	0.099563	-0.03322	0.899399	1.29503	0.501093	1.45399	0.007978	0.277104	0.219617
5.91667	0.229563	-0.13322	0.939399	1.14169	0.501093	1.43732	0.027978	0.310437	0.252951
5.93333	0.272896	-0.21989	0.956066	0.925027	0.56776	1.43732	0.027978	0.320437	0.212951
5.95	0.249563	-0.25989	0.922732	0.835027	0.601093	1.42399	0.021311	0.307104	0.196284
5.96667	0.272896	-0.32322	0.899399	0.791694	0.574426	1.35732	0.027978	0.277104	0.266284
5.98333	0.352896	-0.35989	0.896066	0.758361	0.564426	1.36066	0.041311	0.280437	0.289617
6	0.40623	-0.38656	0.876066	0.748361	0.56776	1.41066	0.094645	0.357104	0.346284
6.01667	0.412896	-0.35656	0.889399	0.678361	0.594426	1.44066	0.194645	0.407104	0.412951
6.03333	0.449563	-0.31322	0.899399	0.521694	0.604426	1.40066	0.251311	0.407104	0.429617
6.05	0.489563	-0.45322	0.926066	0.421694	0.574426	1.37732	0.247978	0.40377	0.272951
6.06667	0.51623	-0.48989	0.936066	0.438361	0.561093	1.38732	0.214645	0.450437	0.239617
6.08333	0.602896	-0.52656	0.942732	0.535027	0.554426	1.30732	0.217978	0.48377	0.189617
6.1	0.66623	-0.52989	1.03607	0.618361	0.574426	1.15399	0.217978	0.52377	0.112951
6.11667	0.73623	-0.55989	1.0894	0.708361	0.594426	1.10066	0.201311	0.600437	0.082951
6.13333	0.702896	-0.56656	1.17607	0.735027	0.604426	1.06732	0.194645	0.67377	-0.03372
6.15	0.719563	-0.55989	1.2794	0.638361	0.574426	0.923989	0.204645	0.717104	0.049617
6.16667	0.78623	-0.53989	1.28273	0.611694	0.55776	0.780656	0.211311	0.67377	0.186284
6.18333	0.839563	-0.48656	1.24607	0.708361	0.58776	0.590656	0.237978	0.637104	0.286284
6.2	0.88623	-0.42322	1.11273	0.761694	0.664426	0.487322	0.294645	0.680437	0.299617
6.21667	0.802896	-0.35656	1.00273	0.695027	0.761093	0.393989	0.304645	0.73377	0.302951
6.23333	0.759563	-0.38989	0.849399	0.638361	0.864426	0.310656	0.224645	0.757104	0.329617
6.25	0.662896	-0.41656	0.822732	0.745027	0.91776	0.137322	0.161311	0.760437	0.092951
6.26667	0.599563	-0.38322	0.792732	0.895027	0.92776	-0.05601	0.297978	0.767104	-0.01705
6.28333	0.622896	-0.36322	0.769399	1.02169	0.891093	-0.19268	0.324645	0.797104	-0.17038
6.3	0.662896	-0.33322	0.766066	1.14503	0.801093	-0.32268	0.267978	0.700437	-0.30038
6.31667	0.649563	-0.25656	0.832732	1.29169	0.701093	-0.43268	0.301311	0.607104	-0.29038
6.33333	0.60623	-0.12989	0.859399	1.36503	0.624426	-0.46934	0.444645	0.64377	-0.24372
6.35	0.609563	0.000109	0.776066	1.47169	0.56776	-0.56601	0.547978	0.69377	-0.22038
6.36667	0.599563	0.026776	0.669399	1.54169	0.614426	-0.63601	0.574645	0.64377	-0.17372
6.38333	0.562896	0.040109	0.649399	1.54503	0.711093	-0.71601	0.614645	0.61377	-0.19372
6.4	0.562896	0.026776	0.706066	1.41836	0.784426	-0.71601	0.694645	0.670437	-0.19372
6.41667	0.529563	0.063443	0.612732	1.24169	0.87776	-0.69934	0.707978	0.67377	-0.20038
6.43333	0.499563	0.153443	0.686066	1.11169	0.85776	-0.67934	0.644645	0.64377	-0.15372
6.45	0.532896	0.180109	0.699399	1.02836	0.81776	-0.65934	0.544645	0.750437	-0.12038
6.46667	0.539563	0.183443	0.622732	0.955027	0.831093	-0.63268	0.534645	0.867104	-0.26372
6.48333	0.469563	0.176776	0.476066	1.02836	0.774426	-0.73268	0.521311	0.910437	-0.43038
6.5	0.442896	0.160109	0.356066	1.11836	0.611093	-0.79268	0.511311	0.87377	-0.42038
6.51667	0.492896	0.196776	0.429399	1.15503	0.521093	-0.78601	0.554645	0.880437	-0.40372
6.53333	0.47623	0.196776	0.479399	1.17169	0.47776	-0.79268	0.487978	0.907104	-0.33038
6.55	0.40623	0.063443	0.439399	1.21169	0.424426	-0.75934	0.464645	0.877104	-0.23705
6.56667	0.489563	0.036776	0.289399	1.25169	0.371093	-0.64934	0.484645	0.810437	-0.25038
6.58333	0.612896	-0.02656	0.299399	1.29169	0.37776	-0.47601	0.587978	0.790437	-0.29038
6.6	0.589563	0.026776	0.299399	1.26169	0.36776	-0.48268	0.717978	0.757104	-0.28038
6.61667	0.439563	0.083443	0.209399	1.25503	0.354426	-0.60934	0.737978	0.68377	-0.19038
6.63333	0.442896	0.036776	0.189399	1.25503	0.361093	-0.67268	0.787978	0.62377	-0.08038
6.65	0.429563	-0.02656	0.259399	1.24503	0.46776	-0.71934	0.751311	0.600437	0.072951
6.66667	0.419563	-0.02656	0.599399	1.17503	0.531093	-0.72934	0.624645	0.587104	0.196284
6.68333	0.342896	-0.00322	0.832732	1.03169	0.551093	-0.73601	0.624645	0.63377	0.276284
6.7	0.239563	-0.02656	1.02607	1.05169	0.564426	-0.70934	0.687978	0.657104	0.349617
6.71667	0.192896	-0.13989	1.03273	1.03503	0.60776	-0.68601	0.747978	0.617104	0.369617
6.73333	0.142896	-0.16656	0.899399	0.951694	0.601093	-0.64934	0.714645	0.59377	0.382951
6.75	0.179563	-0.23656	0.772732	0.885027	0.521093	-0.55934	0.671311	0.480437	0.366284
6.76667	0.199563	-0.29322	0.582732	0.875027	0.431093	-0.46934	0.794645	0.427104	0.309617
6.78333	0.149563	-0.31989	0.449399	0.831694	0.321093	-0.37268	0.774645	0.490437	0.426284
6.8	0.142896	-0.48322	0.472732	0.695027	0.20776	-0.26934	0.817978	0.597104	0.546284
6.81667	0.202896	-0.50656	0.436066	0.581694	0.141093	-0.17934	0.797978	0.630437	0.599617
6.83333	0.22623	-0.48656	0.429399	0.525027	0.234426	-0.11934	0.727978	0.690437	0.619617
6.85	0.342896	-0.36656	0.486066	0.538361	0.24776	-0.00601	0.654645	0.760437	0.576284
6.86667	0.419563	-0.24989	0.506066	0.448361	0.174426	0.040656	0.624645	0.83377	0.592951
6.88333	0.44623	-0.22989	0.562732	0.385027	-0.08224	0.087322	0.577978	0.83377	0.619617
6.9	0.282896	-0.20656	0.586066	0.355027	-0.31224	0.140656	0.437978	0.867104	0.632951
6.91667	0.219563	-0.22322	0.562732	0.321694	-0.30891	0.220656	0.361311	0.897104	0.666284
6.93333	0.30623	-0.07989	0.506066	0.291694	-0.14891	0.293989	0.281311	0.927104	0.659617
6.95	0.35623	-0.03656	0.509399	0.251694	-0.12557	0.333989	0.304645	0.98377	0.626284
6.96667	0.359563	0.013443	0.489399	0.228361	-0.18557	0.350656	0.467978	0.920437	0.582951
6.98333	0.152896	0.126776	0.462732	0.288361	-0.07224	0.390656	0.467978	0.850437	0.556284
7	0.09623	0.216776	0.449399	0.391694	0.174426	0.383989	0.454645	0.83377	0.496284
7.01667	0.17623	0.330109	0.456066	0.441694	0.20776	0.403989	0.441311	0.920437	0.539617
7.03333	0.199563	0.423443	0.326066	0.451694	0.22776	0.433989	0.381311	0.92377	0.716284
7.05	0.22623	0.460109	0.362732	0.485027	0.334426	0.437322	0.217978	0.947104	0.776284
7.06667	0.299563	0.520109	0.439399	0.505027	0.304426	0.447322	0.141311	0.99377	0.812951
7.08333	0.372896	0.583443	0.489399	0.481694	0.23776	0.480656	0.284645	1.08044	0.782951
7.1	0.349563	0.683443	0.356066	0.508361	0.22776	0.470656	0.287978	1.19377	0.729617
7.11667	0.26623	0.853443	0.436066	0.515027	0.20776	0.467322	0.207978	1.31044	0.559617
7.13333	0.242896	0.900109	0.232732	0.488361	0.144426	0.523989	0.127978	1.44044	0.426284
7.15	0.282896	0.900109	-0.09393	0.485027	0.091093	0.567322	0.124645	1.46044	0.476284
7.16667	0.342896	0.896776	-0.14727	0.521694	0.141093	0.530656	0.171311	1.40377	0.522951
7.18333	0.38623	0.920109	-0.19393	0.585027	0.201093	0.467322	0.247978	1.2771	0.542951
7.2	0.382896	0.946776	-0.2006	0.568361	0.25776	0.483989	0.344645	1.21044	0.589617
7.21667	0.39623	0.980109	-0.18393	0.551694	0.291093	0.447322	0.327978	1.13377	0.592951
7.23333	0.479563	1.10011	-0.06393	0.521694	0.271093	0.390656	0.321311	0.92377	0.572951
7.25	0.489563	1.03678	0.206066	0.471694	0.21776	0.343989	0.474645	0.880437	0.562951
7.26667	0.469563	0.983443	0.162732	0.441694	0.264426	0.317322	0.567978	0.91377	0.599617
7.28333	0.509563	0.923443	0.236066	0.448361	0.384426	0.220656	0.634645	0.910437	0.592951
7.3	0.44623	0.970109	0.626066	0.541694	0.404426	0.207322	0.694645	0.89377	0.592951
7.31667	0.39623	1.12678	0.992732	0.538361	0.321093	0.300656	0.707978	0.88377	0.589617
7.33333	0.30623	1.19011	1.04273	0.485027	0.254426	0.240656	0.637978	0.74377	0.582951
7.35	0.289563	1.18344	0.946066	0.451694	0.21776	0.210656	0.657978	0.500437	0.586284
7.36667	0.312896	1.18344	0.932732	0.495027	0.181093	0.187322	0.684645	0.44377	0.576284
7.38333	0.25623	1.20344	0.919399	0.431694	0.15776	0.227322	0.767978	0.480437	0.516284
7.4	0.112896	1.24011	0.916066	0.335027	0.154426	0.273989	0.864645	0.43377	0.426284
7.41667	-0.07044	1.22678	0.812732	0.271694	0.161093	0.300656	0.957978	0.390437	0.496284
7.43333	-0.09377	1.19344	0.772732	0.301694	0.171093	0.213989	1.07465	0.497104	0.516284
7.45	-0.0771	1.10678	0.826066	0.325027	0.18776	0.297322	1.07465	0.59377	0.506284
7.46667	-0.1271	0.963443	0.606066	0.378361	0.241093	0.450656	0.977978	0.600437	0.529617
7.48333	-0.24044	0.776776	0.356066	0.395027	0.28776	0.493989	0.937978	0.560437	0.556284
7.5	-0.35044	0.676776	0.189399	0.425027	0.28776	0.487322	0.954645	0.490437	0.486284
7.51667	-0.28044	0.670109	0.312732	0.355027	0.294426	0.467322	0.941311	0.39377	0.392951
7.53333	-0.15377	0.780109	0.546066	0.311694	0.13776	0.460656	0.907978	0.390437	0.352951
7.55	-0.04044	0.893443	0.616066	0.368361	0.011093	0.397322	0.897978	0.39377	0.332951
7.56667	0.019563	0.923443	0.689399	0.385027	-0.03891	0.393989	0.951311	0.400437	0.306284
7.58333	0.059563	0.926776	0.712732	0.365027	-0.06891	0.437322	1.09131	0.450437	0.282951
7.6	0.072896	0.816776	0.649399	0.391694	-0.14224	0.457322	0.994645	0.44377	0.299617
7.61667	0.05623	0.756776	0.632732	0.611694	-0.23224	0.477322	0.811311	0.447104	0.422951
7.63333	0.04623	0.750109	0.582732	0.668361	-0.23891	0.497322	0.707978	0.47377	0.496284
7.65	-0.06377	0.783443	0.612732	0.755027	-0.20224	0.510656	0.591311	0.420437	0.589617
7.66667	-0.27044	0.636776	0.592732	0.785027	-0.09891	0.520656	0.514645	0.447104	0.519617
7.68333	-0.35377	0.546776	0.552732	0.775027	-0.04891	0.530656	0.474645	0.480437	0.339617
7.7	-0.3771	0.580109	0.482732	0.818361	-0.03557	0.577322	0.454645	0.477104	0.226284
7.71667	-0.3971	0.680109	0.089399	0.891694	0.09776	0.530656	0.484645	0.500437	0.182951
7.73333	-0.3671	0.770109	0.036066	0.901694	0.16776	0.440656	0.487978	0.520437	0.186284
7.75	-0.39377	0.900109	0.159399	0.891694	0.15776	0.357322	0.454645	0.53377	0.212951
7.76667	-0.48377	1.10344	0.339399	0.978361	0.10776	0.273989	0.414645	0.507104	0.229617
7.78333	-0.48377	1.21678	0.459399	1.14836	0.15776	0.313989	0.234645	0.49377	0.236284
7.8	-0.42377	1.14011	0.572732	1.25503	0.26776	0.360656	0.071311	0.417104	0.209617
7.81667	-0.38377	0.850109	0.622732	1.28836	0.324426	0.337322	0.007978	0.357104	0.289617
7.83333	-0.43377	0.703443	0.672732	1.30169	0.45776	0.430656	-0.02202	0.427104	0.262951
7.85	-0.45377	0.686776	0.509399	1.36503	0.494426	0.417322	0.067978	0.447104	0.332951
7.86667	-0.48044	0.903443	0.342732	1.44836	0.48776	0.397322	0.181311	0.507104	0.319617
7.88333	-0.2971	1.06344	0.432732	1.46836	0.48776	0.317322	0.247978	0.647104	0.192951
7.9	-0.0571	1.16678	0.666066	1.34836	0.504426	0.230656	0.281311	0.747104	0.196284
7.91667	0.012896	1.11678	0.662732	1.28503	0.544426	0.080656	0.454645	0.700437	0.272951
7.93333	0.02623	0.826776	0.569399	1.25836	0.53776	0.147322	0.537978	0.590437	0.399617
7.95	0.132896	0.450109	0.599399	1.22503	0.474426	0.377322	0.627978	0.547104	0.526284
7.96667	0.212896	0.250109	0.729399	1.20836	0.41776	0.517322	0.777978	0.407104	0.536284
7.98333	0.379563	0.176776	0.786066	1.18503	0.404426	0.720656	0.811311	0.49377	0.429617
8	0.389563	0.116776	0.832732	1.09836	0.421093	0.853989	0.854645	0.587104	0.282951
8.01667	0.289563	0.013443	0.819399	1.05503	0.41776	0.880656	0.857978	0.480437	0.216284
8.03333	0.199563	-0.05989	0.642732	1.02169	0.441093	0.830656	0.787978	0.517104	0.132951
8.05	0.129563	-0.09989	0.409399	1.00169	0.434426	0.690656	0.717978	0.540437	0.029617
8.06667	0.14623	-0.05322	0.276066	0.858361	0.431093	0.623989	0.664645	0.567104	0.026284
8.08333	0.199563	0.053443	0.122732	0.795027	0.42776	0.590656	0.647978	0.627104	-0.02705
8.1	0.21623	0.000109	0.002732	0.791694	0.43776	0.623989	0.607978	0.650437	-0.16372
8.11667	0.242896	-0.06322	0.032732	0.855027	0.431093	0.683989	0.654645	0.600437	-0.05372
8.13333	0.322896	-0.08989	0.169399	0.865027	0.314426	0.740656	0.741311	0.61377	0.112951
8.15	0.39623	-0.12656	0.179399	0.855027	0.21776	0.710656	0.717978	0.54377	0.182951
8.16667	0.36623	-0.14656	0.119399	0.828361	0.18776	0.690656	0.711311	0.450437	0.152951
8.18333	0.359563	-0.18322	0.396066	0.825027	0.004426	0.607322	0.721311	0.350437	0.256284
8.2	0.402896	-0.21322	0.436066	0.985027	-0.05557	0.513989	0.621311	0.310437	0.349617
8.21667	0.42623	-0.19322	0.346066	1.10503	-0.05557	0.583989	0.334645	0.26377	0.442951
8.23333	0.462896	-0.15656	0.242732	1.04503	0.084426	0.683989	0.121311	0.19377	0.726284
8.25	0.53623	-0.18989	0.212732	0.881694	0.071093	0.773989	0.001311	0.177104	0.856284
8.26667	0.59623	-0.20656	0.199399	0.735027	0.07776	0.800656	-0.00869	0.170437	0.892951
8.28333	0.689563	-0.17322	0.269399	0.758361	0.154426	0.613989	0.014645	0.127104	0.872951
8.3	0.802896	-0.15656	0.346066	0.788361	0.22776	0.580656	0.047978	0.10377	0.789617
8.31667	0.762896	-0.11656	0.386066	0.781694	0.28776	0.657322	0.004645	0.07377	0.766284
8.33333	0.712896	-0.03322	0.316066	0.751694	0.42776	0.743989	-0.09536	0.020437	0.776284
8.35	0.76623	-0.02322	0.496066	0.708361	0.474426	0.777322	-0.22869	0.08377	0.569617
8.36667	0.80623	0.036776	0.849399	0.681694	0.48776	0.767322	-0.19202	-0.0029	0.436284
8.38333	0.89623	0.126776	1.03273	0.728361	0.58776	0.723989	-0.15869	-0.07623	0.426284
8.4	0.90623	0.216776	1.0594	0.881694	0.624426	0.573989	-0.18202	-0.06956	0.389617
8.41667	0.832896	0.276776	1.05273	0.931694	0.504426	0.547322	-0.30869	-0.0829	0.402951
8.43333	0.699563	0.293443	1.09273	0.935027	0.341093	0.597322	-0.29536	0.010437	0.442951
8.45	0.622896	0.323443	1.0694	0.971694	0.214426	0.613989	-0.26869	0.11377	0.519617
8.46667	0.732896	0.406776	0.919399	0.995027	0.141093	0.587322	-0.30202	0.240437	0.519617
8.48333	0.78623	0.466776	0.839399	1.01169	-0.06224	0.460656	-0.34202	0.26377	0.559617
8.5	0.752896	0.483443	0.906066	0.928361	-0.12891	0.477322	-0.30869	0.237104	0.616284
8.51667	0.632896	0.490109	0.902732	0.928361	-0.03557	0.590656	-0.26869	0.180437	0.662951
8.53333	0.559563	0.596776	0.929399	0.941694	0.034426	0.723989	-0.20536	0.137104	0.762951
8.55	0.58623	0.616776	0.922732	0.975027	0.09776	0.747322	-0.11202	0.200437	0.929617
8.56667	0.629563	0.563443	0.869399	0.945027	0.12776	0.783989	0.084645	0.300437	0.862951
8.58333	0.652896	0.610109	0.806066	0.901694	0.114426	0.703989	0.164645	0.357104	0.699617
8.6	0.609563	0.733443	0.796066	0.785027	0.144426	0.620656	0.154645	0.300437	0.612951
8.61667	0.562896	0.796776	0.822732	0.771694	0.081093	0.603989	0.111311	0.390437	0.546284
8.63333	0.499563	0.820109	0.949399	0.831694	-0.00557	0.647322	0.084645	0.640437	0.402951
8.65	0.50623	0.793443	1.02273	0.851694	-0.02224	0.680656	0.084645	0.767104	0.336284
8.66667	0.389563	0.796776	0.902732	0.838361	-0.03557	0.650656	0.141311	0.767104	0.299617
8.68333	0.48623	0.923443	0.776066	0.981694	-0.04891	0.653989	0.184645	0.75377	0.262951
8.7	0.699563	0.883443	0.786066	1.06503	-0.05891	0.683989	0.191311	0.687104	0.189617
8.71667	0.769563	0.813443	0.849399	1.02836	-0.04891	0.593989	0.224645	0.697104	0.156284
8.73333	0.779563	0.890109	0.712732	1.07169	-0.09224	0.457322	0.207978	0.63377	0.109617
8.75	0.84623	1.00344	0.666066	1.09169	-0.16891	0.427322	0.271311	0.527104	0.112951
8.76667	0.752896	1.05678	0.642732	1.14836	-0.25891	0.447322	0.357978	0.55377	0.116284
8.78333	0.61623	1.14344	0.649399	1.19836	-0.36891	0.497322	0.431311	0.490437	0.109617
8.8	0.58623	1.14678	0.849399	1.19503	-0.36224	0.550656	0.404645	0.46377	0.122951
8.81667	0.589563	1.09344	0.872732	1.11503	-0.18224	0.480656	0.481311	0.43377	0.132951
8.83333	0.532896	0.966776	0.779399	1.08169	0.021093	0.450656	0.597978	0.38377	0.159617
8.85	0.519563	0.913443	0.689399	1.04836	0.19776	0.503989	0.621311	0.327104	0.166284
8.86667	0.559563	0.890109	0.579399	1.00169	0.284426	0.410656	0.687978	0.300437	0.119617
8.88333	0.579563	0.823443	0.436066	1.07503	0.321093	0.557322	0.734645	0.26377	0.072951
8.9	0.45623	0.570109	0.262732	1.05503	0.411093	0.797322	0.691311	0.30377	0.069617
8.91667	0.289563	0.313443	0.192732	0.961694	0.38776	0.923989	0.604645	0.29377	0.082951
8.93333	0.382896	0.296776	0.249399	0.901694	0.381093	1.01399	0.511311	0.277104	0.099617
8.95	0.419563	0.286776	0.692732	0.768361	0.44776	1.19399	0.484645	0.317104	0.089617
8.96667	0.399563	0.270109	0.969399	0.631694	0.521093	1.47732	0.471311	0.30377	0.076284
8.98333	0.429563	0.196776	1.27273	0.488361	0.66776	1.52732	0.434645	0.23377	0.066284
9	0.469563	0.096776	1.35273	0.575027	0.714426	1.47732	0.371311	0.06377	0.012951
9.01667	0.44623	-0.06322	1.34607	0.525027	0.594426	1.53732	0.394645	-0.03623	0.062951
9.03333	0.47623	-0.13989	1.3394	0.341694	0.54776	1.54399	0.371311	-0.0929	0.162951
9.05	0.492896	-0.14322	1.30607	0.298361	0.764426	1.48399	0.354645	-0.20623	0.262951
9.06667	0.492896	-0.21322	1.1494	0.235027	0.901093	1.51066	0.364645	-0.16956	0.212951
9.08333	0.462896	-0.31656	0.956066	0.301694	1.05109	1.46399	0.311311	0.010437	0.186284
9.1	0.47623	-0.33656	0.789399	0.495027	1.05109	1.43399	0.247978	0.110437	0.439617
9.11667	0.57623	-0.32989	0.639399	0.545027	1.02443	1.40399	0.161311	0.13377	0.522951
9.13333	0.629563	-0.32989	0.576066	0.571694	1.03109	1.27732	0.111311	0.13377	0.452951
9.15	0.64623	-0.28322	0.552732	0.548361	1.00443	1.23399	0.111311	0.16377	0.349617
9.16667	0.499563	-0.23989	0.509399	0.601694	0.981093	1.19732	0.241311	0.140437	0.406284
9.18333	0.389563	-0.18989	0.479399	0.595027	0.904426	0.950656	0.221311	-0.00623	0.486284
9.2	0.469563	-0.18989	0.392732	0.581694	0.77776	0.763989	-0.01869	-0.0829	0.459617
9.21667	0.49623	-0.15989	0.326066	0.728361	0.764426	0.700656	-0.25869	-0.1429	0.399617
9.23333	0.372896	-0.07656	0.292732	0.731694	0.584426	0.627322	-0.35536	-0.1729	0.402951
9.25	0.252896	-0.10322	0.259399	0.518361	0.61776	0.513989	-0.43536	-0.1629	0.412951
9.26667	0.28623	-0.27989	0.352732	0.271694	0.734426	0.450656	-0.47202	-0.10956	0.502951
9.28333	0.39623	-0.44989	0.436066	0.178361	0.701093	0.367322	-0.56202	-0.04623	0.512951
9.3	0.40623	-0.58322	0.602732	0.168361	0.624426	0.370656	-0.59869	-0.0929	0.396284
9.31667	0.442896	-0.65989	0.676066	0.251694	0.594426	0.583989	-0.60202	-0.1629	0.286284
9.33333	0.419563	-0.66656	0.662732	0.248361	0.464426	0.817322	-0.61869	-0.04623	0.446284
9.35	0.479563	-0.51322	0.722732	0.378361	0.341093	0.937322	-0.61869	0.027104	0.612951
9.36667	0.52623	-0.44322	0.826066	0.641694	0.30776	0.933989	-0.58202	-0.09623	0.646284
9.38333	0.442896	-0.43989	0.552732	0.738361	0.301093	0.943989	-0.51202	0.007104	0.582951
9.4	0.402896	-0.34989	0.286066	0.735027	0.354426	1.01732	-0.41202	0.06377	0.459617
9.41667	0.352896	-0.23989	0.126066	0.825027	0.511093	0.927322	-0.34202	0.010437	0.399617
9.43333	0.319563	-0.12656	-0.15727	0.858361	0.514426	0.667322	-0.36202	-0.06623	0.429617
9.45	0.139563	-0.01989	-0.2406	0.711694	0.561093	0.523989	-0.50536	-0.1629	0.319617
9.46667	-0.0971	-0.01989	-0.20393	0.615027	0.45776	0.513989	-0.58202	-0.19956	0.376284
9.48333	-0.18377	-0.06322	-0.00727	0.638361	0.561093	0.580656	-0.57202	-0.14956	0.499617
9.5	-0.15044	-0.07989	0.372732	0.651694	0.65776	0.783989	-0.51536	-0.03623	0.536284
9.51667	-0.09377	-0.21989	0.606066	0.668361	0.75776	0.857322	-0.52536	0.10377	0.502951
9.53333	-0.0671	-0.19989	0.666066	0.685027	0.714426	0.853989	-0.55202	0.15377	0.479617
9.55	-0.35377	-0.15989	0.732732	0.698361	0.664426	0.780656	-0.57536	0.240437	0.446284
9.56667	-0.3471	-0.03656	0.789399	0.688361	0.64776	0.950656	-0.66202	0.18377	0.446284
9.58333	-0.3071	0.046776	0.829399	0.721694	0.66776	1.07399	-0.78869	0.140437	0.466284
9.6	-0.51377	0.130109	0.899399	0.711694	0.614426	1.06399	-0.90536	0.24377	0.456284
9.61667	-0.62044	0.356776	0.892732	0.591694	0.664426	0.987322	-0.96536	0.28377	0.479617
9.63333	-0.61044	0.343443	0.782732	0.421694	0.58776	0.910656	-0.97536	0.240437	0.546284
9.65	-0.67044	0.110109	0.629399	0.388361	0.531093	0.953989	-1.03869	0.017104	0.532951
9.66667	-0.67044	0.023443	0.479399	0.398361	0.67776	1.06066	-1.00536	-0.16623	0.502951
9.68333	-0.65044	0.003443	0.459399	0.468361	0.85776	1.13732	-0.88869	-0.1729	0.529617
9.7	-0.62044	-0.06656	0.396066	0.678361	0.86776	1.23399	-0.81536	-0.10956	0.429617
9.71667	-0.55044	-0.10656	0.169399	0.841694	0.89776	1.17732	-0.75202	-0.0729	0.476284
9.73333	-0.3971	-0.13656	0.019399	0.941694	0.901093	0.953989	-0.67869	-0.0329	0.566284
9.75	-0.3271	-0.20656	0.009399	1.10169	0.861093	0.890656	-0.64202	0.017104	0.446284
9.76667	-0.3371	-0.19656	0.082732	1.03169	0.791093	0.867322	-0.66536	0.067104	0.452951
9.78333	-0.38044	-0.15322	0.176066	0.891694	0.73776	0.760656	-0.72869	0.110437	0.616284
9.8	-0.40377	-0.03989	0.316066	0.891694	0.744426	0.703989	-0.74202	0.127104	0.636284
9.81667	-0.43044	-0.01656	0.272732	0.885027	0.891093	0.743989	-0.73536	0.280437	0.516284
9.83333	-0.45377	0.090109	0.279399	0.891694	1.00443	0.690656	-0.70869	0.247104	0.459617
9.85	-0.38044	0.106776	0.352732	1.11503	1.00109	0.790656	-0.68202	0.08377	0.399617
9.86667	-0.3871	0.033443	0.419399	1.38503	0.881093	1.15732	-0.71202	-0.1129	0.292951
9.88333	-0.4571	-0.02322	0.506066	1.46503	0.834426	1.33732	-0.78202	-0.16956	0.329617
9.9	-0.36044	-0.06989	0.692732	1.37836	0.531093	1.31732	-0.89202	-0.03623	0.446284
9.91667	-0.19377	-0.11989	0.882732	1.18836	0.53776	1.35066	-0.94869	-0.00623	0.589617
9.93333	-0.1471	-0.12322	0.876066	1.15836	0.79776	1.30732	-1.04202	0.02377	0.459617
9.95	-0.06377	-0.06989	0.789399	1.18169	0.90776	1.26399	-0.97202	0.060437	0.242951
9.96667	0.119563	-0.07989	0.742732	1.17836	0.88776	1.19066	-0.85869	0.01377	0.052951
9.98333	0.199563	-0.11656	0.702732	1.16836	0.58776	1.25732	-0.94869	-0.0629	0.026284
10	0.38623	-0.12322	0.662732	1.11169	0.414426	1.18066	-0.91869	-0.1029	0.182951
10.0167	0.649563	-0.00656	0.666066	1.15503	0.46776	1.08066	-0.88536	-0.11623	0.296284
10.0333	0.779563	0.083443	0.579399	1.19503	0.684426	1.04399	-0.90869	-0.17623	0.332951
10.05	0.86623	0.053443	0.586066	1.16169	0.911093	1.01732	-0.96202	-0.19956	0.339617
10.0667	0.829563	0.043443	0.619399	1.10169	1.14776	0.983989	-0.96536	-0.23623	0.246284
10.0833	0.792896	0.053443	0.669399	1.09169	1.26109	0.843989	-1.05869	-0.2729	0.296284
10.1	0.73623	0.240109	0.719399	1.09169	1.34109	0.700656	-1.07869	-0.21956	0.406284
10.1167	0.659563	0.470109	0.629399	1.09836	1.41776	0.703989	-1.00869	-0.1629	0.492951
10.1333	0.532896	0.550109	0.519399	1.17836	1.30109	0.773989	-0.93536	-0.01623	0.459617
10.15	0.319563	0.566776	0.499399	1.20503	1.27443	0.863989	-0.79536	0.137104	0.309617
10.1667	0.159563	0.563443	0.436066	1.16836	1.17776	1.00399	-0.71869	0.207104	0.236284
10.1833	0.132896	0.380109	0.576066	1.14836	1.16776	1.15066	-0.67869	0.237104	0.249617
10.2	0.159563	0.296776	0.856066	1.11503	1.10109	1.14399	-0.68202	0.23377	0.299617
10.2167	0.079563	0.136776	0.632732	1.08169	1.06776	0.963989	-0.77202	0.077104	0.359617
10.2333	-0.0171	-0.00322	0.512732	1.08503	1.14109	0.877322	-0.80202	-0.16956	0.352951
10.25	-0.09377	0.026776	0.432732	1.01503	1.23109	0.740656	-0.86202	-0.38623	0.322951
10.2667	-0.18377	0.076776	0.242732	0.868361	1.27109	0.593989	-0.77869	-0.34956	0.416284
10.2833	-0.18377	0.146776	0.226066	0.725027	1.31776	0.490656	-0.67869	-0.19956	0.629617
10.3	-0.16377	0.216776	0.196066	0.635027	1.25109	0.403989	-0.71202	-0.2029	0.989617
10.3167	-0.05377	0.376776	0.382732	0.751694	1.05109	0.453989	-0.74536	-0.26956	1.24962
10.3333	0.09623	0.490109	0.542732	0.805027	0.80776	0.583989	-0.69536	-0.41956	1.32962
10.35	0.109563	0.506776	0.619399	0.865027	0.78776	0.687322	-0.65869	-0.36623	1.36295
10.3667	0.119563	0.340109	0.612732	0.925027	0.824426	0.817322	-0.59869	-0.20623	1.37628
10.3833	0.062896	0.213443	0.206066	0.891694	0.941093	0.793989	-0.56869	-0.15623	1.38295
10.4	-0.1271	0.016776	0.136066	0.868361	0.994426	0.797322	-0.59202	-0.13956	1.43628
10.4167	-0.28044	-0.12989	0.226066	0.721694	1.03443	0.817322	-0.65869	-0.1429	1.32962
10.4333	-0.3871	-0.17989	0.412732	0.355027	0.884426	0.853989	-0.67536	-0.10956	1.04295
10.45	-0.33377	-0.20322	0.519399	0.061694	0.681093	0.863989	-0.62202	-0.05623	0.712951
10.4667	-0.18044	-0.20989	0.516066	0.078361	0.701093	0.797322	-0.57536	-0.0829	0.636284
10.4833	-0.1071	-0.26322	0.496066	0.068361	0.684426	0.740656	-0.54202	-0.20956	0.682951
10.5	-0.0571	-0.20989	0.432732	0.035027	0.634426	0.707322	-0.64869	-0.2829	0.686284
10.5167	0.09623	-0.21322	0.519399	0.015027	0.654426	0.640656	-0.80536	-0.26623	0.692951
10.5333	0.27623	-0.19989	0.542732	-0.02164	0.794426	0.623989	-0.80536	0.06377	0.579617
10.55	0.382896	-0.14989	0.539399	0.161694	0.89776	0.617322	-0.78536	0.23377	0.596284
10.5667	0.29623	-0.15322	0.596066	0.195027	0.881093	0.633989	-0.72536	0.32377	0.622951
10.5833	0.26623	-0.18656	0.496066	0.195027	0.87776	0.570656	-0.49869	0.45377	0.649617
10.6	0.282896	-0.19989	0.472732	0.308361	0.824426	0.413989	-0.43202	0.530437	0.736284
10.6167	0.229563	-0.05989	0.549399	0.451694	0.734426	0.123989	-0.44536	0.52377	0.832951
10.6333	0.199563	0.026776	0.532732	0.455027	0.67776	-0.04934	-0.37536	0.540437	0.852951
10.65	0.11623	-0.00989	0.599399	0.411694	0.68776	-0.08268	-0.37202	0.590437	0.782951
10.6667	0.05623	-0.10656	0.626066	0.451694	0.634426	0.227322	-0.43536	0.530437	0.839617
10.6833	0.049563	-0.07322	0.462732	0.421694	0.61776	0.387322	-0.55869	0.37377	1.01628
10.7	-0.07044	-0.13656	0.382732	0.365027	0.67776	0.497322	-0.57536	0.13377	1.08295
10.7167	-0.11044	-0.28656	0.282732	0.415027	0.654426	0.413989	-0.61536	-0.32956	1.05628
10.7333	-0.1571	-0.26656	0.269399	0.651694	0.58776	0.390656	-0.66202	-0.5129	1.00962
10.75	-0.16377	-0.18322	0.246066	0.908361	0.591093	0.380656	-0.87202	-0.4229	0.936284
10.7667	-0.13044	-0.18322	0.302732	0.925027	0.72776	0.177322	-0.95869	-0.29623	0.882951
10.7833	-0.05044	-0.31656	0.486066	0.861694	0.861093	0.180656	-1.14202	-0.1229	0.929617
10.8	-0.0971	-0.51989	0.762732	0.918361	0.884426	0.180656	-1.21202	0.00377	0.996284
10.8167	-0.10044	-0.55989	0.792732	0.858361	0.851093	0.260656	-1.16202	0.040437	1.07628
10.8333	-0.02044	-0.48656	0.682732	0.941694	0.82776	0.263989	-1.04869	0.167104	1.04628
10.85	-0.0871	-0.34989	0.469399	1.05169	0.851093	0.233989	-0.91536	0.300437	0.992951
10.8667	-0.17377	-0.29322	0.432732	1.10836	0.83776	0.227322	-0.86869	0.26377	1.02628
10.8833	-0.3671	-0.34656	0.692732	1.12836	0.74776	0.243989	-0.87202	0.180437	0.989617
10.9	-0.48044	-0.39656	0.909399	1.17169	0.88776	0.187322	-0.81869	0.16377	0.919617
10.9167	-0.4371	-0.43989	0.966066	1.16836	0.974426	0.177322	-0.79536	0.17377	0.636284
10.9333	-0.3371	-0.44989	0.822732	1.20503	0.974426	0.097322	-0.78202	0.08377	0.432951
10.95	-0.2271	-0.57322	0.552732	1.25836	0.941093	0.010656	-0.73536	0.040437	0.336284
10.9667	-0.13044	-0.67989	0.679399	1.33836	0.771093	-0.00268	-0.63869	0.177104	0.376284
10.9833	0.092896	-0.73656	0.746066	1.32503	0.671093	0.087322	-0.55869	0.407104	0.526284
11	0.18623	-0.71656	0.699399	1.33836	0.65776	0.193989	-0.58869	0.54377	0.536284
11.0167	0.199563	-0.65989	0.669399	1.38503	0.561093	0.430656	-0.66869	0.637104	0.339617
11.0333	0.242896	-0.59656	0.739399	1.44503	0.431093	0.543989	-0.69202	0.670437	0.312951
11.05	0.302896	-0.59322	0.776066	1.42836	0.304426	0.617322	-0.72202	0.717104	0.239617
11.0667	0.362896	-0.56656	0.789399	1.35836	0.344426	0.743989	-0.83536	0.77377	0.132951
11.0833	0.459563	-0.63656	0.722732	1.38169	0.481093	0.887322	-0.95869	0.84377	0.092951
11.1	0.592896	-0.89989	0.542732	1.40169	0.674426	0.893989	-0.94536	0.87377	0.079617
11.1167	0.61623	-0.96322	0.342732	1.34836	0.821093	0.797322	-0.85869	0.837104	0.092951
11.1333	0.492896	-0.82656	0.356066	1.34836	0.83776	0.633989	-0.83202	0.730437	0.112951
11.15	0.399563	-0.61656	0.376066	1.39836	0.654426	0.627322	-0.84536	0.580437	0.162951
11.1667	0.419563	-0.57989	0.289399	1.52503	0.65776	0.710656	-0.88869	0.387104	0.089617
11.1833	0.392896	-0.58322	0.419399	1.56836	0.54776	0.760656	-0.83869	0.320437	-0.10705
11.2	0.372896	-0.50656	0.646066	1.42836	0.42776	0.723989	-0.73202	0.29377	-0.11705
11.2167	0.299563	-0.41322	0.702732	1.10169	0.32776	0.603989	-0.64202	0.270437	0.072951
11.2333	0.22623	-0.43989	0.689399	0.965027	0.351093	0.390656	-0.64202	0.170437	0.106284
11.25	0.119563	-0.36322	0.732732	0.898361	0.334426	0.257322	-0.64536	0.230437	-0.08705
11.2667	-0.0471	-0.31322	0.796066	0.718361	0.434426	0.277322	-0.65869	0.217104	-0.07705
11.2833	-0.17377	-0.33656	0.796066	0.705027	0.481093	0.303989	-0.76202	0.19377	0.026284
11.3	-0.28377	-0.34656	0.712732	0.661694	0.47776	0.273989	-0.77536	0.19377	0.189617
11.3167	-0.32377	-0.43322	0.549399	0.625027	0.501093	0.270656	-0.80536	0.290437	0.529617
11.3333	-0.3071	-0.59989	0.346066	0.601694	0.494426	0.273989	-0.82869	0.407104	0.786284
11.35	-0.3571	-0.63656	0.309399	0.501694	0.42776	0.323989	-0.87536	0.39377	0.709617
11.3667	-0.32044	-0.76989	0.299399	0.545027	0.461093	0.333989	-0.90536	0.297104	0.612951
11.3833	-0.3171	-0.82989	0.242732	0.478361	0.524426	0.250656	-0.86536	0.227104	0.636284
11.4	-0.34044	-0.83989	0.166066	0.405027	0.471093	0.340656	-0.77536	0.050437	0.636284
11.4167	-0.19377	-0.76322	0.266066	0.185027	0.494426	0.447322	-0.72202	-0.17623	0.696284
11.4333	-0.03044	-0.63989	0.359399	0.098361	0.684426	0.437322	-0.72202	-0.36956	0.719617
11.45	0.069563	-0.49322	0.526066	0.241694	0.774426	0.490656	-0.85869	-0.37956	0.756284
11.4667	0.06623	-0.39656	0.719399	0.338361	0.83776	0.603989	-1.00869	-0.32623	0.892951
11.4833	0.002896	-0.37989	0.796066	0.385027	0.851093	0.500656	-1.12202	-0.26956	0.876284
11.5	-0.04377	-0.34322	0.889399	0.435027	0.94776	0.353989	-1.14202	-0.2229	0.639617
11.5167	-0.17377	-0.35322	0.836066	0.441694	0.781093	0.320656	-0.98869	-0.16623	0.549617
11.5333	-0.30044	-0.34656	0.669399	0.448361	0.72776	0.190656	-0.71869	-0.17623	0.446284
11.55	-0.3871	-0.31656	0.506066	0.485027	0.774426	0.107322	-0.65202	-0.1629	0.442951
11.5667	-0.53044	-0.26656	0.336066	0.391694	0.661093	0.110656	-0.58869	-0.1229	0.526284
11.5833	-0.6171	-0.23322	0.346066	0.398361	0.654426	0.117322	-0.57536	-0.12956	0.689617
11.6	-0.61377	-0.18656	0.546066	0.458361	0.674426	-0.04268	-0.57202	-0.22956	0.799617
11.6167	-0.55044	-0.15989	0.716066	0.568361	0.70776	-0.15601	-0.60869	-0.31956	0.832951
11.6333	-0.41377	-0.15322	0.786066	0.551694	0.691093	-0.08934	-0.71536	-0.33956	0.699617
11.65	-0.25377	-0.14322	0.719399	0.491694	0.66776	0.053989	-0.66202	-0.25956	0.652951
11.6667	-0.0671	0.013443	0.772732	0.608361	0.644426	0.107322	-0.64536	-0.2129	0.699617
11.6833	-0.0271	0.160109	1.01607	0.671694	0.551093	0.210656	-0.64869	-0.25956	0.696284
11.7	-0.16044	0.186776	1.1294	0.608361	0.484426	0.407322	-0.73869	-0.2629	0.579617
11.7167	-0.20044	0.176776	0.946066	0.618361	0.541093	0.683989	-0.72202	-0.16956	0.432951
11.7333	-0.2271	0.213443	0.562732	0.605027	0.564426	0.613989	-0.76869	-0.0729	0.356284
11.75	-0.23044	0.233443	0.502732	0.525027	0.621093	0.417322	-0.79869	0.030437	0.366284
11.7667	-0.19377	0.173443	0.482732	0.375027	0.834426	0.223989	-0.72202	0.16377	0.452951
11.7833	-0.0671	0.043443	0.499399	0.308361	0.79776	0.250656	-0.63536	0.21377	0.412951
11.8	0.039563	-0.04989	0.566066	0.238361	0.744426	0.427322	-0.49869	0.160437	0.262951
11.8167	-0.0371	0.023443	0.519399	0.168361	0.931093	0.537322	-0.41869	0.02377	0.126284
11.8333	-0.12044	0.080109	0.406066	0.211694	1.11443	0.687322	-0.38536	-0.02623	-0.01372
11.85	-0.04044	0.130109	0.419399	0.358361	1.05443	0.567322	-0.47869	-0.13623	-0.07372
11.8667	0.07623	0.230109	0.386066	0.611694	0.871093	0.373989	-0.60536	-0.32623	-0.03372
11.8833	0.149563	0.380109	0.309399	0.791694	0.801093	0.290656	-0.65202	-0.53623	0.029617
11.9	0.039563	0.446776	0.236066	0.871694	0.83776	0.420656	-0.67536	-0.62623	-0.02372
11.9167	-0.13044	0.513443	0.226066	0.855027	0.76776	0.393989	-0.72202	-0.7029	0.032951
11.9333	-0.18044	0.400109	0.252732	0.841694	0.741093	0.277322	-0.79202	-0.7229	0.176284
11.95	-0.22377	0.123443	0.302732	0.805027	0.84776	0.220656	-0.81869	-0.6929	0.212951
11.9667	-0.3871	-0.08656	0.449399	0.705027	0.884426	0.043989	-0.72869	-0.7829	0.379617
11.9833	-0.63377	-0.20656	0.552732	0.601694	0.871093	-0.04601	-0.56202	-0.83623	0.442951
12	-0.94377	-0.00656	0.562732	0.558361	0.77776	-0.03268	-0.57869	-0.76956	0.569617
